# Supplementary material for: Prevalence of type 2 diabetes mellitus and impaired fasting glucose, and their associated lifestyle factors among teachers in the CLUSTer cohort
Source: PeerJ. 2024 Jan 22;12:e16778. doi: 10.7717/peerj.16778 (PMC10809994; doi:10.7717/peerj.16778)
Supplement: Data S1 [file peerj-12-16778-s011.xlsx]

## Sheet: Sheet1
Data	Age_CAT	Disease	Proportion	CI_Lower	CI_upper
NHMS	25-29	DM	1.4	1	2.2
NHMS	30-34	DM	3.4	2.4	4.8
NHMS	35-39	DM	3.4	2.6	4.5
NHMS	40-44	DM	6.9	5.6	8.6
NHMS	45-49	DM	10.5	8.9	12.2
NHMS	50-54	DM	14.8	12.8	17.1
NHMS	55-59	DM	20.6	18.2	23.2
NHMS	25-29	Undiagnosed_DM	7.4	6.1	9
NHMS	30-34	Undiagnosed_DM	7.2	5.8	8.9
NHMS	35-39	Undiagnosed_DM	9.5	7.9	11.3
NHMS	40-44	Undiagnosed_DM	11	8.9	13.5
NHMS	45-49	Undiagnosed_DM	11.5	9.7	13.6
NHMS	50-54	Undiagnosed_DM	12.2	10.4	14.2
NHMS	55-59	Undiagnosed_DM	12.4	10.5	14.5
NHMS	25-29	IFG	3.9	2.9	5.1
NHMS	30-34	IFG	3.9	2.9	5.3
NHMS	35-39	IFG	4.6	3.5	6.1
NHMS	40-44	IFG	6	4.7	7.6
NHMS	45-49	IFG	5.8	4.7	7.3
NHMS	50-54	IFG	5.8	4.6	7.3
NHMS	55-59	IFG	5.9	4.7	7.5
CLUSTer	25-29	DM	0.9	0.570548	1.43297
CLUSTer	30-34	DM	1.7	1.09921	2.4708
CLUSTer	35-39	DM	2.5	1.74289	3.68244
CLUSTer	40-44	DM	4	3.06522	5.25829
CLUSTer	45-49	DM	5.4	4.41709	6.59801
CLUSTer	50-54	DM	8.5	6.82804	10.501
CLUSTer	55-59	DM	9.4	6.95928	12.6363
CLUSTer	25-29	Undiagnosed_DM	1.4	0.852965	2.42398
CLUSTer	30-34	Undiagnosed_DM	2.3	1.63501	3.2056
CLUSTer	35-39	Undiagnosed_DM	4.4	3.00105	5.34857
CLUSTer	40-44	Undiagnosed_DM	6.6	5.34135	8.01973
CLUSTer	45-49	Undiagnosed_DM	7.9	6.62951	9.4817
CLUSTer	50-54	Undiagnosed_DM	8.8	7.06618	10.8226
CLUSTer	55-59	Undiagnosed_DM	11.3	8.35119	15.142
CLUSTer	25-29	IFG	2.1	1.31945	3.22094
CLUSTer	30-34	IFG	2.7	2.02415	3.72531
CLUSTer	35-39	IFG	4.1	3.05785	5.38949
CLUSTer	40-44	IFG	5.3	4.17478	6.78461
CLUSTer	45-49	IFG	10.5	8.89628	12.4497
CLUSTer	50-54	IFG	8.1	6.52069	10.061
CLUSTer	55-59	IFG	10.4	7.0934	14.9946
