# Supplementary material for: Prevalence of type 2 diabetes mellitus and impaired fasting glucose, and their associated lifestyle factors among teachers in the CLUSTer cohort
Source: PeerJ. 2024 Jan 22;12:e16778. doi: 10.7717/peerj.16778 (PMC10809994; doi:10.7717/peerj.16778)
Supplement: Data S2 [file peerj-12-16778-s012.xlsx]

## Sheet: Sheet1
No	School_weight	States	School	Age	Sex	Ethnic	Edu_level	marital	Fam_His_DM_CAT	Fruit	Vege	Fruit_Vege_adequate	sleep_hr_day_cleaned	sleep_hr_end_cleaned	Total_Mets	sit_min	smoke_ever	alcohol	waist_cleaned	Waist_CAT	Total_Depression	Total_Anxiety	Total_Stress	glucose_cleaned	sys1_cleaned	dias1_cleaned	tc_cleaned	tg_cleaned	hdl_cleaned	ldl_cleaned	DM	IFG
1	103.333	1_Johor	SMK JEMENTAH	49	Male	Malay	Degree	Married	No	1			7	7	1572	240	No	No	99.5	No	2	0	2	5.5	123	73	5.5		1.1	2.95	Healthy	Healthy
2	103.333	1_Johor	SMK JEMENTAH	34	Male	Malay	Degree	Married	Yes	0	0	Inadequate	5	5	6426		No	No	103	No	8	14	12	5	128	80	5.2	2.5	1.2	2.86	Healthy	Healthy
3	103.333	1_Johor	SMK JEMENTAH	36	Female	Chinese	Degree	Married	Yes	0	1	Inadequate	6	8	0	120	No	No	78.1	Abdominal obese	14	6	16	4.7	129	75	6.2	2.5	1.6	3.46	Healthy	Healthy
4	103.333	1_Johor	SMK JEMENTAH	30	Female	Malay	Degree	Married	No	1			5	5	6570	180	No	No	65.5	Abdominal obese	2	8	6	4.5	103	66		0.4	1.7		Healthy	Healthy
5	103.333	1_Johor	SMK JEMENTAH	48	Male	Indian	Master and above	Married	No	1	1	Inadequate	6	8	720	60	No	No	100.5	No	0	0	0	5.4	152	94	5.6	1	1.3	3.85	Healthy	Healthy
6	103.333	1_Johor	SMK JEMENTAH	40	Female	Malay									0				66.4	Abdominal obese				5	113	77	4.5	0.7	1.5	2.68	Healthy	Healthy
7	103.333	1_Johor	SMK JEMENTAH	49	Female	Chinese	Degree	Single	Yes	2	2	Inadequate	6	8	0		No	No	75.3	Abdominal obese	8	2	10	5.2	161	96	6.1	1.6	1.4	3.97	Healthy	Healthy
8	103.333	1_Johor	SMK JEMENTAH	35	Male	Malay	Degree	Married	No	0	0	Inadequate	6	5	358	480		No	102.2	No	0	8	2	4.7	140	100	4.6	1.7	1.3	2.53	Healthy	Healthy
9	103.333	1_Johor	SMK JEMENTAH	47	Male	Malay	Degree	Married	Yes	1	2	Inadequate	4	4	3234	480	Yes	No	94.5	No	8	16	6	6.8	152	95	4.9	1.3	1.6	2.71	T2DM
10	103.333	1_Johor	SMK JEMENTAH	34	Female	Malay	Degree	Married	No	2	3	Adequate	8	9	3360		No	No	90.2	No	8	10	14	4.6	115	73	5.1	1.3	1.3	3.21	Healthy	Healthy
11	103.333	1_Johor	SMK JEMENTAH	37	Female	Malay	Degree	Married	No	0	1	Inadequate	7	7	951		No	No	98	No	4	10	8	4.7	164	95	4.5	0.8	1.3	2.84	Healthy	Healthy
12	103.333	1_Johor	SMK JEMENTAH	29	Male	Malay	Degree	Married	Yes	1	2	Inadequate	7	6	1680		Yes	No	113	No	0	4	8	4.8	167	94	4.9	0.7	1.1	3.48	Healthy	Healthy
13	103.333	1_Johor	SMK JEMENTAH	43	Female	Chinese	Degree	Married	No	2	2	Inadequate	6	7	2226	240	No	Yes	82	No	0	0	0	4.8	145	90	4	0.5	1.5	2.27	Healthy	Healthy
14	103.333	1_Johor	SMK JEMENTAH	41	Female	Indian									0				72	Abdominal obese				4.9	111	60	6.3	1	1.8	4.05	Healthy	Healthy
15	103.333	1_Johor	SMK JEMENTAH	56	Male	Malay	Degree	Married	No	2	1	Inadequate	5	6	11706	120	Yes	No	110	No	4	16	12	4	155	85	5	1.4	1.5	2.86	Healthy	Healthy
16	103.333	1_Johor	SMK JEMENTAH	39	Female	Malay	Degree	Married	No	1	1	Inadequate	5	6	4626	270	No	No	72	Abdominal obese	4	2	2	5.1	116	64	3.8	0.4	1.4	2.22	Healthy	Healthy
17	103.333	1_Johor	SMK JEMENTAH	48	Male	Malay									0				93.5	No				4.8	168	106	4.4	0.9	1.4	2.59	Healthy	Healthy
18	103.333	1_Johor	SMK JEMENTAH	29	Male	Malay	Degree	Married	Yes	2	7	Adequate	8	7	1884	120	No		86	Abdominal obese	2	2	0	4.1	118	74	4.1	0.7	1.6	2.18	Healthy	Healthy
19	103.333	1_Johor	SMK JEMENTAH	48	Male	Malay	Degree	Married	No	1	1	Inadequate	6	6	1920		No		79	Abdominal obese	0	0	0	5.4	109	74	5.2	0.8	1.6	3.24	Healthy	Healthy
20	103.333	1_Johor	SMK JEMENTAH	39	Male	Malay									0				102.1	No				4.8	147	93	4.6	1.7	1.4	2.43	Healthy	Healthy
21	103.333	1_Johor	SMK JEMENTAH	34	Female	Chinese	Degree	Married	Yes	1	1	Inadequate	6	5	240	30	No		76	Abdominal obese	10	8	12	4.5	109	70	5.3	0.6	1.8	3.23	Healthy	Healthy
22	103.333	1_Johor	SMK JEMENTAH	34	Female	Malay	Degree	Married	Yes				8	9	2826		No		99.5	No	2	6	12	4.5	159	99		0.7	1.3	1.68	Healthy	Healthy
23	90.933	1_Johor	SMK LABIS	46	Female	Malay	Degree	Married		0	0	Inadequate	7	6	0		No	No	94	No	2	12	8	4.9	123	88	5.3	1.1	1.2	3.6	Healthy	Healthy
24	90.933	1_Johor	SMK LABIS	52	Male	Malay	Degree	Married	No	1	1	Inadequate	5	6	964.5	180	No	No	84	Abdominal obese	18	12	16	5.3	130	79	7.7	1.4	1.7	5.36	Healthy	Healthy
25	90.933	1_Johor	SMK LABIS	48	Female	Malay	Degree	Married	No	1	1	Inadequate	7	7	2647.5	60	No	No	87	No	0	8	2	11.5	149	96	4.4	1.2	1.1	2.76	Undiagnosed T2DM
26	90.933	1_Johor	SMK LABIS	45	Female	Malay	Degree	Married		7	1	Inadequate	5	5	825	180		No	99	No	0	0	0	5.7	139	96	4.4	0.6	1.3	2.83	T2DM
27	90.933	1_Johor	SMK LABIS	44	Male	Malay	Degree	Married	No	1	1	Inadequate	7	8	0	120	No	No	90	No	18	20	14	4.9	142	90	5.6	1.1	1	4.1	Healthy	Healthy
28	90.933	1_Johor	SMK LABIS	39	Female	Malay	Degree	Married	Yes	1			5	5	3045	60	No	No	84	No	10	10	14	4.7	119	86	6.3		1.3	3.09	Healthy	Healthy
29	90.933	1_Johor	SMK LABIS	41	Male	Malay	Degree	Married	Yes				6	8	1980	240	No	No	70.5	Abdominal obese	4	4	8	4.8	128	80	6.5	0.7	1.8	4.38	Healthy	Healthy
30	90.933	1_Johor	SMK LABIS	52	Male	Malay	Degree	Married	No		1		5	6	1207.5		No	No	72	Abdominal obese	2	8	6	4.7	167		5.5	1.6	1	3.77	Healthy	Healthy
31	90.933	1_Johor	SMK LABIS	50	Female	Malay	Degree	Married	No	0			6	5	1920	720		No	97.5	No	4	8	10	4.8	140	88	3.6	0.4	1.4	2.02	Healthy	Healthy
32	90.933	1_Johor	SMK LABIS	32	Female	Malay	Degree	Married	No	7	4	Adequate	4	6	914	180		No	81	No	0	2	0	4.9	127	83	4.5	1.4	1.2	2.66	Healthy	Healthy
33	90.933	1_Johor	SMK LABIS	34	Female	Malay	Degree	Single	Yes	1	2	Inadequate	7	8	240	30	No	No	93	No	2	4	2	6.5	152		4.1	1.1	1.1	2.5	Undiagnosed T2DM
34	90.933	1_Johor	SMK LABIS	48	Female	Malay	Degree	Married	Yes	1	2	Inadequate	5	6	1215	300	No	No	92	No	24	18	24	7.6	149	92	5.9	1.7	1.4	3.73	Undiagnosed T2DM
35	90.933	1_Johor	SMK LABIS	28	Female	Malay	Degree	Married		1	1	Inadequate	5	5	0		No	No	65.8	Abdominal obese	6	6	8	4.2	101	62	3.7	0.4	1.4	2.12	Healthy	Healthy
36	90.933	1_Johor	SMK LABIS	29	Female	Malay	Degree	Single	No				7	9	0		No	No	99	No	12	16	16	5.5	132	85	5.7	1.2	1	4.16	Healthy	Healthy
37	90.933	1_Johor	SMK LABIS	57	Male	Chinese	Diploma	Married	Yes						297		No	No	69.5	Abdominal obese	14	14	14	4.8	138	89	5.3	0.6		2.33	Healthy	Healthy
38	90.933	1_Johor	SMK LABIS	44	Female	Indian	Degree	Married	No	0	1	Inadequate	6	6	3084	480	No	No	89	No	14	14	14	4.5	126	79	6.7	2.1	1.2	4.55	Healthy	Healthy
39	90.933	1_Johor	SMK LABIS	51	Female	Malay	Master and above	Widowed	No	0	1	Inadequate	6	6	1017	20	No	No	82.5	No	0	4	6	5.3		97	6.4	0.9	1.9	4.09	Healthy	Healthy
40	90.933	1_Johor	SMK LABIS	51	Female	Indian	Degree	Widowed	No	1	1	Inadequate	6	6	480	270		No	80	No	0	6	10	4.7	143	88	4.5	0.8	0.8	3.34	Healthy	Healthy
41	90.933	1_Johor	SMK LABIS	31	Female	Malay	Degree	Married	No	0	1	Inadequate		7	5064	300	No	No	69	Abdominal obese	14	18	14	4.4	124	75	5.8	0.6	1.5	4.03	Healthy	Healthy
42	90.933	1_Johor	SMK LABIS	29	Male	Malay	Degree	Married	Yes	1	1	Inadequate	7	8	0		No	No	89	Abdominal obese	0	0	2	4.6	129	82	4.9	1.4	1.1	3.16	T2DM
43	162.381	1_Johor	SMK (LKTP) MAOKIL	45	Female	Malay	Degree	Single	Yes	1	1	Inadequate	8	8	0	210	No	No			0	0	6	4.7	119	64	6.4	0.9	2.13	3.83	Healthy	Healthy
44	162.381	1_Johor	SMK (LKTP) MAOKIL	46	Female	Malay	Master and above	Single	Yes	1	7	Inadequate	6	7	0		No	No	80	No	2	8	6	5.1	159	88	5.5	1.2	1.43	3.54	Healthy	Healthy
45	162.381	1_Johor	SMK (LKTP) MAOKIL	46	Male	Indian	Master and above	Married	Yes	1	2	Inadequate	6	6	1095		No	No	80	Abdominal obese	4	8	14	4.7	105	61	4.7	1	1.2	3.08	Healthy	Healthy
46	162.381	1_Johor	SMK (LKTP) MAOKIL	30	Female	Malay	Degree	Single	No	0			5	6	960	180	No	No			4	0	2	4.9	134	76	5.3	0.9	1.91	2.99	Healthy	Healthy
47	162.381	1_Johor	SMK (LKTP) MAOKIL	30	Male	Malay	Degree	Single	No	2	0	Inadequate	5	6	6426	120	Yes	No	71	Abdominal obese	10	10	20	4.7	129	84	4.2	1	1.26	2.41	Healthy	Healthy
48	162.381	1_Johor	SMK (LKTP) MAOKIL	45	Female	Malay	Master and above	Married	No	1	1	Inadequate	5	5	1866	150	No	No	92	No	0	2	0	5.2	131	81	6	1.6	1.19	4.07	Healthy	Healthy
49	162.381	1_Johor	SMK (LKTP) MAOKIL	38	Female	Malay	Degree	Single	Yes	1	5	Inadequate	4	8	1040		No	No	91	No	4	10	14	5.6	122	79	5.5	0.8	1.22	3.93	Healthy	Impaired fasting glucose
50	162.381	1_Johor	SMK (LKTP) MAOKIL	48	Male	Malay	Degree	Married	No	0			6	7	3930	210	No	No	98	No	6	8	12	5.1	158	96	7.7	2	1.46	5.36	Healthy	Healthy
51	162.381	1_Johor	SMK (LKTP) MAOKIL	48	Male	Malay	Degree	Married	No	1	1	Inadequate	5	5	942	30	No	No	72	Abdominal obese	4	6	10	5.3	150	108	6.2	2.4	1.3	3.81	Healthy	Healthy
52	162.381	1_Johor	SMK (LKTP) MAOKIL	42	Male	Malay	Degree	Married	Yes	1	1	Inadequate	6	6	2970	180	Yes	No	92.5	No	6	8	10	4.6	143	83	4.8	2.2	1.03	2.77	Healthy	Healthy
53	162.381	1_Johor	SMK (LKTP) MAOKIL	52	Male	Malay	Degree	Married	No	3	1	Inadequate			462		No	No	92	No	0	0	0	5.2	134	87	4	1	1.14	2.47	Healthy	Healthy
54	162.381	1_Johor	SMK (LKTP) MAOKIL	46	Male	Malay	Degree	Married	Yes	1	1	Inadequate	4		657	130	No	No	82	Abdominal obese	8	12	14	4.7	146	91	4.3	1.2	1	2.75	Healthy	Healthy
55	119.649	1_Johor	SMK DATO' AHMAD ARSHAD	31	Female	Malay	Degree	Married	No	1	1	Inadequate	7	7	720		No	No	67.5	Abdominal obese	0	8	6	4.6	122	76	4.2	0.9	1.06	2.71	Healthy	Healthy
56	119.649	1_Johor	SMK DATO' AHMAD ARSHAD	41	Female	Malay	Master and above	Married	Yes	0	1	Inadequate	5	6	1620	150	No	No	92	No	10	12	14	5.2	161	92	4.4	1.4	1.05	2.75	Healthy	Healthy
57	119.649	1_Johor	SMK DATO' AHMAD ARSHAD	32	Female	Malay	Degree	Married	Yes	1	2	Inadequate	5	6	1680		No	No	83	No	6	4	6	5.1	120	74	4.5	1.1	1.07	2.89	Healthy	Healthy
58	119.649	1_Johor	SMK DATO' AHMAD ARSHAD	29	Female	Malay	Degree	Married	No	0	1	Inadequate	6	7	740		No	No	81	No	26	14	24	5	112	67	4.7	1.6	1.03	2.99	Healthy	Healthy
59	119.649	1_Johor	SMK DATO' AHMAD ARSHAD	30	Female	Malay	Degree	Married	Yes	0	2	Inadequate	5	5	0		No	No	75.5	Abdominal obese	6	4	4	4.9	114	76	4.1	0.6	1.29	2.59	Healthy	Healthy
60	119.649	1_Johor	SMK DATO' AHMAD ARSHAD	32	Female	Malay	Degree	Married	No	0	0	Inadequate	7	5	2586	120	No	No	81	No	2	2	8	4.4	120	77	3.8	1.9	1.63		Healthy	Healthy
61	119.649	1_Johor	SMK DATO' AHMAD ARSHAD	44	Female	Malay	Degree	Married	No	4	2	Inadequate			2586	420	No	No	82	No	0	8	4	5	109	73	7.6	1.3	2.21	4.81	Healthy	Healthy
62	119.649	1_Johor	SMK DATO' AHMAD ARSHAD	54	Male	Malay	Degree	Married	Yes	0	1	Inadequate	6	7	5652	120	No	No	86	Abdominal obese	12	12	12	5.8	128	79	7.4	3	1.4	4.66	Healthy	Impaired fasting glucose
63	119.649	1_Johor	SMK DATO' AHMAD ARSHAD	36	Female	Malay	Degree	Married	Yes	1	2	Inadequate	6	7	0		No	No	74.2	Abdominal obese	2	8	10	4.1	104	66	4.4	0.4	1.72	2.48	Healthy	Healthy
64	119.649	1_Johor	SMK DATO' AHMAD ARSHAD	27	Female	Malay	Degree	Married	No	1	1	Inadequate	7	8	2880	60	No	No	94	No		4	2	4.5	131	64	6.8	1.5	1.32	4.81	Healthy	Healthy
65	119.649	1_Johor	SMK DATO' AHMAD ARSHAD	34	Female	Malay	Degree	Married	Yes	0	1	Inadequate	6	7	1687.5	600	No	No	67	Abdominal obese	14	10	18	4.5	116	75	5.3	0.8	1.74	3.23	Healthy	Healthy
66	119.649	1_Johor	SMK DATO' AHMAD ARSHAD	28	Female	Malay	Degree	Married	Yes	0	1	Inadequate	6	6	0	180		No	60	Abdominal obese	4	0	4	4.9	103	68	4.9	0.9	1.9	2.56	Healthy	Healthy
67	119.649	1_Johor	SMK DATO' AHMAD ARSHAD	44	Male	Indian	Degree	Married	No	0	1	Inadequate	5	7	1687.5	180	No	No	87	Abdominal obese	2	6	14	4.5	153	87	4.6	2.6	0.86	2.53	Healthy	Healthy
68	119.649	1_Johor	SMK DATO' AHMAD ARSHAD	52	Female	Malay	Degree	Married	Yes	1	1	Inadequate	6	6	3870		No	No	76.5	Abdominal obese	0	0	0	5	128	72	7.5	1.2	1.84	5.06	Healthy	Healthy
69	119.649	1_Johor	SMK DATO' AHMAD ARSHAD	48	Female	Malay	Degree	Married	Yes		1		6	8	0		No	No	77	Abdominal obese	0	0	2	5.1	109	68	5.8	2	1.43	3.47	T2DM
70	119.649	1_Johor	SMK DATO' AHMAD ARSHAD	43	Female	Malay	Degree	Married	Yes	0	0	Inadequate	6		0		No	No	79.4	Abdominal obese	0	2	8	5.2	118	72	3.8	0.7	1.47	2	Healthy	Healthy
71	119.649	1_Johor	SMK DATO' AHMAD ARSHAD	30	Male	Malay	Degree	Married	Yes	1	1	Inadequate	7	8	186	180	No	No	82.5	Abdominal obese	2	4	2	4.1	122	81	4.5	1	1.25	2.84	Healthy	Healthy
72	119.649	1_Johor	SMK DATO' AHMAD ARSHAD	37	Female	Malay	Degree	Married	No						600				78	Abdominal obese				4.6	110	75	4.4	0.9	1.2	2.82	Healthy	Healthy
73	119.649	1_Johor	SMK DATO' AHMAD ARSHAD	44	Female	Malay	Degree	Married	Yes	1	1	Inadequate	6	6	1950	180	No	No	91	No	0	0	0	4.2	144	80	6	1.1	1.41	4.07	Healthy	Healthy
74	109.382	1_Johor	SMK SUNGAI ABONG	53	Male	Malay	Diploma	Married	Yes	0	1	Inadequate	5	6	1200	180	No	No	93.5	No	2	0	2	5.5	142	88	5.5	1.2	1.4	3.56	Healthy	Healthy
75	109.382	1_Johor	SMK SUNGAI ABONG	50	Female	Chinese	Degree	Married	Yes	1	1	Inadequate	5	6	2373	90	No	No	69.5	Abdominal obese	6	10	8	4.6	123	60	5.2	0.6	2.1	2.83	Healthy	Healthy
76	109.382	1_Johor	SMK SUNGAI ABONG	47	Female	Chinese	Degree	Married	No	1			7	8	798	360	No	No	64	Abdominal obese	4	6	8	5	133	80		1.2	1.5		Healthy	Healthy
77	109.382	1_Johor	SMK SUNGAI ABONG	51	Female	Malay	Degree	Married	No	1	5	Inadequate			0		No	No	73.5	Abdominal obese	4	2	6	5.6	130	75	6.7	2.8	1.3	4.13	Healthy	Impaired fasting glucose
78	109.382	1_Johor	SMK SUNGAI ABONG	48	Female	Malay	Degree	Divorced	No	2	0	Inadequate	6	6	4320	210	No	No	66	Abdominal obese	2	8	10	4.5	134		4.7	1	1.3	2.95	Healthy	Healthy
79	109.382	1_Johor	SMK SUNGAI ABONG	56	Male	Chinese	Degree	Married	Yes	3	1	Inadequate	7	8	3012	240	No	No	93.5	No	12	4	12	6.6	126	89	5.2	1.3	1.1	3.51	Undiagnosed T2DM
80	109.382	1_Johor	SMK SUNGAI ABONG	41	Female	Chinese	Degree	Married	Yes	1	4	Inadequate	6	5	3210	120	No	No	82	No	2	2	2	5.2	129	77	6.2	1.9	1.9	3.44	Healthy	Healthy
81	109.382	1_Johor	SMK SUNGAI ABONG	26	Female	Malay	Degree	Married	No	0	0	Inadequate	5	6	0	390	No	No	67	Abdominal obese	4	2	2	4.6	116	68		0.5	1.5		Healthy	Healthy
82	109.382	1_Johor	SMK SUNGAI ABONG	48	Female	Malay	Master and above	Married	No	0	1	Inadequate	7	8	960		No	No	88	No	4	14	10	5.2	123	79	7	2.6	1.3	4.52	Healthy	Healthy
83	109.382	1_Johor	SMK SUNGAI ABONG	27	Female	Malay	Degree	Married	Yes	1	2	Inadequate	6	6	975	150	No	No	69	Abdominal obese	8	4	10	5	103		4.9	0.6	1.6	3.03	Healthy	Healthy
84	109.382	1_Johor	SMK SUNGAI ABONG	49	Female	Malay	Degree	Married	No	1	1	Inadequate	6	7	720	180			85	No	4	8	12	4.9	120	76	4.3	1.1	0.9	2.9	Healthy	Healthy
85	109.382	1_Johor	SMK SUNGAI ABONG	57	Male	Malay	Master and above	Married	Yes	0	1	Inadequate	5	4	3600				97	No				5	131	88	5.7	1.6	1.3	3.67	Healthy	Healthy
86	109.382	1_Johor	SMK SUNGAI ABONG	28	Female	Malay	Degree	Married	Yes	0	1	Inadequate	6	5	5040	240	No	No	68	Abdominal obese	4	10	14	4.5	127	99	4.4	0.5	2.1	2.07	Healthy	Healthy
87	109.382	1_Johor	SMK SUNGAI ABONG	56	Male	Malay	Diploma	Married		1	1	Inadequate	6		247.5	420			92.5	No				5.3	157	97	5	1.7	1	3.23	Healthy	Healthy
88	109.382	1_Johor	SMK SUNGAI ABONG	54	Male	Chinese	Diploma	Married	No				5	7	1350	180			89.5	Abdominal obese	4		8	5.4	129	74	5.2	1.8	1	3.38	Healthy	Healthy
89	109.382	1_Johor	SMK SUNGAI ABONG	27	Female	Malay									0				97	No				4.8	120	73	6.7	1.6	1.5	4.47	Healthy	Healthy
90	109.382	1_Johor	SMK SUNGAI ABONG	44	Male	Malay	Degree	Married	No	1	2	Inadequate	6	6	5226		No	No	83.5	Abdominal obese	20	20	22	5.2	112	83	3.8	2	1.2	1.69	Healthy	Healthy
91	109.382	1_Johor	SMK SUNGAI ABONG	27	Female	Malay	Secondary	Married	No	4	2	Inadequate			1386				68	Abdominal obese				4.4	112	66	4.7	0.9	1.6	2.69	Healthy	Healthy
92	109.382	1_Johor	SMK SUNGAI ABONG	32	Male	Malay	Degree	Married	Yes	1	7	Inadequate	7	8	960		No	No	70	Abdominal obese	0	4	6	5.5	112	71	5.3	0.5	1.2	3.87	Healthy	Healthy
93	109.382	1_Johor	SMK SUNGAI ABONG	47	Male	Malay									0				108.5	No				9.6		111	5.7	1.5	1.2	3.82	Undiagnosed T2DM
94	109.382	1_Johor	SMK SUNGAI ABONG	31	Female	Malay	Degree	Married	No	1	3	Inadequate	7	8	297	2	No	No	88.5	No	0	0	8	4.7	105	60	4.3	0.4	1.2	2.92	Healthy	Healthy
95	109.382	1_Johor	SMK SUNGAI ABONG	31	Female	Malay	Degree	Married	No	2	4	Adequate	7	8	1953	120	No	No	87	No	6	6	6	4.7	98		4.5	1.2	1.3	2.66	Healthy	Healthy
96	109.382	1_Johor	SMK SUNGAI ABONG	54	Male	Malay	Degree	Married	No	0	0	Inadequate	6	6	240		No	No	88	Abdominal obese	0	4	6	5.1	148	87	6.7	2.2	1.3	4.4	Healthy	Healthy
97	109.382	1_Johor	SMK SUNGAI ABONG	38	Male	Malay	Degree	Married	No	1	1	Inadequate	5	5	1215	120	Yes	No	85	Abdominal obese		0	10	5.2	135	79	6.3	1.8	1.1	4.38	Healthy	Healthy
98	109.382	1_Johor	SMK SUNGAI ABONG	31	Male	Malay	Degree	Married	No	0	2	Inadequate	7	8	2280		Yes	No	74	Abdominal obese	0	4	6	5.1	130	84	5.9	1	1.1	4.35	Healthy	Healthy
99	105.175	1_Johor	SMK SULTAN ALAUDDIN RIAYAT SHAH 1	55	Male	Malay	Degree	Married	Yes		1		7	7	0		No	No	96.5	No	0	2	0	5.4	148	89	4.7	1.2	1.5	2.66	Healthy	Healthy
100	105.175	1_Johor	SMK SULTAN ALAUDDIN RIAYAT SHAH 1	30	Female	Malay	Degree	Married	No	0	1	Inadequate	6	7	546	60	No	No	64.5	Abdominal obese	0	8	4	4	127	83		0.6	1.4	1.83	Healthy	Healthy
101	105.175	1_Johor	SMK SULTAN ALAUDDIN RIAYAT SHAH 1	33	Female	Malay	Degree	Married	Yes	0	1	Inadequate	6	7	546	60	No	No	62	Abdominal obese	0	4	4	4.5	111	74	4.4	0.6	2.1	2.03	Healthy	Healthy
102	105.175	1_Johor	SMK SULTAN ALAUDDIN RIAYAT SHAH 1	33	Female	Indian	Degree	Married	Yes	1	7	Inadequate	7	8	2373	90		No	83	No	6	12	8	4.8	124	69	4.7	1.3	1.4	2.71	Healthy	Healthy
103	105.175	1_Johor	SMK SULTAN ALAUDDIN RIAYAT SHAH 1	42	Female	Malay	Degree	Married	Yes	1	1	Inadequate	6	7	240		No	No	78	Abdominal obese	6	8	8	5.2	117	77	4.8	0.6	1	3.53	Healthy	Healthy
104	105.175	1_Johor	SMK SULTAN ALAUDDIN RIAYAT SHAH 1	33	Female	Indian	Degree	Married	Yes		2				4398	60	No	No	83.5	No	42	42	42	4.5	118	72	5.4	2	1.1	3.39	Healthy	Healthy
105	105.175	1_Johor	SMK SULTAN ALAUDDIN RIAYAT SHAH 1	30	Female	Malay	Degree	Married	Yes	0	0	Inadequate	7	6	1290		No	No	70.5	Abdominal obese	10	10	10	4.4	117	69	5	0.6	1.7	3.03	Healthy	Healthy
106	105.175	1_Johor	SMK SULTAN ALAUDDIN RIAYAT SHAH 1	34	Female	Malay	Degree	Married	No	7	7	Adequate	6	7	0		No	No	98	No	14	18	16	4.8	119	82	5.2	0.8	1.3	3.54	Healthy	Healthy
107	105.175	1_Johor	SMK SULTAN ALAUDDIN RIAYAT SHAH 1	31	Female	Malay	Degree	Married	Yes	0	1	Inadequate	6	6	360	15	No	No	89	No	6	6	4	4.4	109	63		2.9	0.7		Healthy	Healthy
108	105.175	1_Johor	SMK SULTAN ALAUDDIN RIAYAT SHAH 1	40	Female	Malay	Degree	Married	No	0	2	Inadequate	6	6	5040	120	No	No	82	No	12	4	10	4.5	132	78	4.1	0.8	1.3	2.44	Healthy	Healthy
109	105.175	1_Johor	SMK SULTAN ALAUDDIN RIAYAT SHAH 1	40	Female	Malay	Degree	Married	No	1	1	Inadequate	4	8	7518	360	No	No	65	Abdominal obese	0	4	8	4.2	113	65	3.8	0.6	1.6	1.93	Healthy	Healthy
110	105.175	1_Johor	SMK SULTAN ALAUDDIN RIAYAT SHAH 1	29	Female	Chinese	Degree	Single	Yes	0	0	Inadequate	6	8	99		No	No	65	Abdominal obese	10	6	12	4.5	100	78	4.6	0.9	1.3	2.89	Healthy	Healthy
111	105.175	1_Johor	SMK SULTAN ALAUDDIN RIAYAT SHAH 1	33	Female	Chinese	Degree	Married	Yes	1	2	Inadequate	8	9	153	240	No	No	79	Abdominal obese	14	10	28	5.2	117	68	4.3	0.6	1.1	2.93	Healthy	Healthy
112	105.175	1_Johor	SMK SULTAN ALAUDDIN RIAYAT SHAH 1	40	Female	Chinese									0				75.7	Abdominal obese				5.1	116	74	4	1.2	1.2	2.26	Healthy	Healthy
113	105.175	1_Johor	SMK SULTAN ALAUDDIN RIAYAT SHAH 1	43	Female	Malay	Degree	Married	No	0	2	Inadequate	5	7	0		No	No			4	8	4	5	98	60	5.8	0.7	1.6	3.88	Healthy	Healthy
114	105.175	1_Johor	SMK SULTAN ALAUDDIN RIAYAT SHAH 1	50	Male	Malay	Degree	Married	Yes	1	1	Inadequate	4	4	3615	120	Yes	No	87.5	Abdominal obese	2	12	6	5.9	145	87	5.6	0.7	1.4	3.88	Healthy	Impaired fasting glucose
115	105.175	1_Johor	SMK SULTAN ALAUDDIN RIAYAT SHAH 1	38	Male	Malay									0				90	No				4.6	176		6.2	1.2	1.1	4.56	Healthy	Healthy
116	105.175	1_Johor	SMK SULTAN ALAUDDIN RIAYAT SHAH 1	33	Female	Malay									0				76	Abdominal obese					113	65	5.3	0.6	2.1	2.93	Healthy	Healthy
117	105.175	1_Johor	SMK SULTAN ALAUDDIN RIAYAT SHAH 1	44	Female	Malay	Degree	Married	No	1	1	Inadequate			1200	20	No	No	96	No	6	10	14	6.3	136	80	5.7		1	3.11	Undiagnosed T2DM
118	105.175	1_Johor	SMK SULTAN ALAUDDIN RIAYAT SHAH 1	39	Female	Chinese	Degree	Single	No	1			7	9	0		No	Yes	71	Abdominal obese	2	6	10	5.3	112	67	4.2	0.9	1.4	2.39	Healthy	Healthy
119	105.175	1_Johor	SMK SULTAN ALAUDDIN RIAYAT SHAH 1	35	Female	Malay	Degree	Married	Yes	0	0	Inadequate	6	7	5130	300	Yes	No	60	Abdominal obese	0	4	0	4.3	99	71	4.5	0.6	1.6	2.63	Healthy	Healthy
120	105.175	1_Johor	SMK SULTAN ALAUDDIN RIAYAT SHAH 1	28	Female	Malay									0				79	Abdominal obese				4.8	116	66	4	0.8	1.4	2.24	Healthy	Healthy
121	105.175	1_Johor	SMK SULTAN ALAUDDIN RIAYAT SHAH 1	28	Female	Malay									0				74.2	Abdominal obese				5.2	117	68	6	0.9	1.6	3.99	Healthy	Healthy
122	105.175	1_Johor	SMK SULTAN ALAUDDIN RIAYAT SHAH 1	53	Male	Malay	Master and above	Married	Yes	1	1	Inadequate	6	6	3213	360	No	No			2	10	2	5.4	105	74		1.8	1.1		Healthy	Healthy
123	105.175	1_Johor	SMK SULTAN ALAUDDIN RIAYAT SHAH 1	46	Female	Malay	Degree	Married	No	1	1	Inadequate			720	30		No	89	No	6	6	2	4.8	122	65	5.4	1	1.4	3.55	T2DM
124	105.175	1_Johor	SMK SULTAN ALAUDDIN RIAYAT SHAH 1	32	Female	Malay									0				62	Abdominal obese				4.6	109	67	4.4	1.1	1.4	2.5	Healthy	Healthy
125	278.749	1_Johor	SMK SUNGAI TIRAM	29	Female	Malay	Degree	Married	Yes	0	1	Inadequate	5	6	606	150	No	No	69	Abdominal obese	4	8	12	5	113	76	4.3	0.5	1.72	2.35	Healthy	Healthy
126	278.749	1_Johor	SMK SUNGAI TIRAM	31	Male	Malay	Degree	Married	Yes	1	1	Inadequate	6	6	0		Yes	No	78	Abdominal obese	10	12	10	4.4	121	73	4	1.4	1.15	2.21	Healthy	Healthy
127	278.749	1_Johor	SMK SUNGAI TIRAM	30	Female	Malay	Degree	Single	No	2	3	Adequate			2970		No	No	68	Abdominal obese	0		2	4.7	105	69	4.9	1.3	1.15	3.16	Healthy	Healthy
128	278.749	1_Johor	SMK SUNGAI TIRAM	26	Female	Malay	Degree	Single	Yes	1	1	Inadequate			693		No	No	94	No	4	6	0	4.6	122	86	5.1	1.4	1.18	3.28	Healthy	Healthy
129	278.749	1_Johor	SMK SUNGAI TIRAM	27	Female	Malay	Degree	Single	Yes	1	3	Inadequate	8	6	1980	420	No	No	64	Abdominal obese	14	18	22	4.8	115	67	5.1	0.5	1.29	3.58	Healthy	Healthy
130	278.749	1_Johor	SMK SUNGAI TIRAM	27	Female	Malay	Master and above	Single	Yes	1	1	Inadequate	5	7	693	60	No	No	91	No	8	16	20	4.5	156	107	4.7	1.3	1.22	2.89	Healthy	Healthy
131	278.749	1_Johor	SMK SUNGAI TIRAM	25	Female	Malay	Master and above	Single	No	2	3	Adequate	6	6	0		No	No	68	Abdominal obese	2	4	4	4.8	129	74	4.5	0.9	1.47	2.62	Healthy	Healthy
132	278.749	1_Johor	SMK SUNGAI TIRAM	26	Female	Malay	Degree		Yes	2	1	Inadequate	5	7	628.5	120	No	No	75	Abdominal obese	14	24	18	4.2	123	84	5	0.6	1.44	3.29	Healthy	Healthy
133	278.749	1_Johor	SMK SUNGAI TIRAM	44	Female	Malay	Degree	Married	No	1	1	Inadequate	5	5	49.5	120	No	No	75	Abdominal obese	6	4	12	4.5	115	72	4	0.6	1.57	2.16	Healthy	Healthy
134	278.749	1_Johor	SMK SUNGAI TIRAM	38	Female	Malay	Degree	Divorced	Yes	0	2	Inadequate			0		No	No	77	Abdominal obese	8	10	8	6.2	112	62	5.6	1.3	1.27		Undiagnosed T2DM
135	278.749	1_Johor	SMK SUNGAI TIRAM	33	Female	Indian	Degree	Married	No	1	1	Inadequate	6	8	330	120	No	No	73	Abdominal obese	4	4	12	4.8	108	79	4.5	0.7	1.39	2.79	Healthy	Healthy
136	278.749	1_Johor	SMK SUNGAI TIRAM	26	Female	Indian	Degree	Married	No	2	2	Inadequate	7	8	12078	60	No	No	69	Abdominal obese	0	4	0	4.7	110	67	3.6	0.6	1.07	2.26	Healthy	Healthy
137	278.749	1_Johor	SMK SUNGAI TIRAM	48	Female	Malay	Degree	Married	Yes	0	1	Inadequate	6	8	0	180			75	Abdominal obese				5.2	132	99	7.4	2	1.6	4.89	Healthy	Healthy
138	278.749	1_Johor	SMK SUNGAI TIRAM	47	Female	Malay	Degree	Married	No	1	2	Inadequate	6	6	0				96	No				4.9	151	88	3.6	0.9	1.18	2.01	Healthy	Healthy
139	278.749	1_Johor	SMK SUNGAI TIRAM	31	Male	Malay	Degree	Married					6	6	2970	180			76	Abdominal obese				5.3	117	72	4.9	1.4	0.89	3.37	Healthy	Healthy
140	278.749	1_Johor	SMK SUNGAI TIRAM	26	Female	Malay	Degree	Single	Yes	1	1	Inadequate	6	8	120	15	No	No	86	No	16	16	18		136	89		0.4	1.19		Healthy	Healthy
141	278.749	1_Johor	SMK SUNGAI TIRAM	34	Female	Malay	Degree	Married	Yes	1	1	Inadequate	5	6	693	30			65	Abdominal obese				4.2	102	66	5.1	0.5	1.63	3.24	Healthy	Healthy
142	278.749	1_Johor	SMK SUNGAI TIRAM	48	Female	Malay	Degree	Married	Yes	1	1	Inadequate	8	7	0		No	No	84	No	14	16	14	5.1	144	79	4.3	0.8	1.49	2.45	Healthy	Healthy
143	278.749	1_Johor	SMK SUNGAI TIRAM	53	Male	Malay	Master and above	Married	No				6	8	1770	180			111	No				8.5		100	4.3	1.2	0.91	2.85	Undiagnosed T2DM
144	278.749	1_Johor	SMK SUNGAI TIRAM	26	Female	Malay	Degree	Single	Yes	1	1	Inadequate	6	7	480				89	No				4.4	111	73	6.6	1.3	1.85	4.16	Healthy	Healthy
145	278.749	1_Johor	SMK SUNGAI TIRAM	26	Female	Malay	Degree	Single	Yes				7	8	1386	840			82	No				4.6	133	82	4.1	0.6	1.37	2.46	Healthy	Healthy
146	278.749	1_Johor	SMK SUNGAI TIRAM	31	Female	Malay	Degree	Married	No	1	1	Inadequate	5	6	440		No	No	80	No	6	16	12	4.5	111	66	4.2	1.1	1.04	2.66	Healthy	Healthy
147	278.749	1_Johor	SMK SUNGAI TIRAM	36	Female	Other races	Degree	Married	Yes	0	1	Inadequate	5	5	0		No	No	82	No	6	8	12	4.3	114	66	5.6	0.7	1.6	3.68	Healthy	Healthy
148	278.749	1_Johor	SMK SUNGAI TIRAM	29	Female	Malay	Degree	Married	No	2	2	Inadequate	6	6	1080		No	No	78	Abdominal obese	0	4	4	4.1	103	64	3.8	0.4	1.53	2.09	Healthy	Healthy
149	278.749	1_Johor	SMK SUNGAI TIRAM	28	Female	Malay	Degree	Married	No	3	3	Adequate	6	7	2346	150	No	No	73	Abdominal obese	4	4	10	5.2	141	80	4.6	0.8	1.11	3.13	Healthy	Healthy
150	278.749	1_Johor	SMK SUNGAI TIRAM	27	Female	Malay	Degree	Single	No	1	1	Inadequate	7	6	0		No	No	64	Abdominal obese	6	4	12	4.3	116	72	4.9	0.8	1.12	3.42	Healthy	Healthy
151	278.749	1_Johor	SMK SUNGAI TIRAM	45	Female	Indian	Secondary	Married	No	0	1	Inadequate	5	7	2940	61	No	No	93	No	0	6	4	4.1	113	72	4.1	0.8	1.24	2.5	Healthy	Healthy
152	278.749	1_Johor	SMK SUNGAI TIRAM	25	Female	Malay	Secondary	Married	Yes	1	0	Inadequate	7		9012		No	No	75	Abdominal obese	14	16	16	4.2	114	73	4.7	0.6		3.02	Healthy	Healthy
153	278.749	1_Johor	SMK SUNGAI TIRAM	26	Male	Malay	Secondary	Single	No	0	0	Inadequate	8	8	0	300		No	107	No	0	6	14	10.9	159	87	4.8	2.6	0.8	2.82	Undiagnosed T2DM
154	278.749	1_Johor	SMK SUNGAI TIRAM	30	Female	Malay									0				64	Abdominal obese				4.1	111	68	5.1	0.7	1.77	3.01	Healthy	Healthy
155	278.749	1_Johor	SMK SUNGAI TIRAM	30	Female	Malay	Degree	Married	No	2	2	Inadequate	6	7	0		No	No	70	Abdominal obese	8	14	8	4.6	117	73	3.8	0.7	1.49	1.99	Healthy	Healthy
156	109.172	1_Johor	SMK SULTAN ALAUDDIN	43	Female	Malay	Degree	Married	Yes	2	4	Adequate	7	8	1440	180	No	No	80	No	4	10	12	5.2	129	78	5	1.4	1.2	3.16	Healthy	Healthy
157	109.172	1_Johor	SMK SULTAN ALAUDDIN	48	Female	Malay	Degree	Married	Yes	1	3	Inadequate	7	5	4524	120	No	No	93	No	4	4	2	10.4			5	1.3	1.3	3.11	T2DM
158	109.172	1_Johor	SMK SULTAN ALAUDDIN	31	Female	Malay									0				66	Abdominal obese				4.7	106	70	4.1	0.7	1.5	2.28	Healthy	Healthy
159	109.172	1_Johor	SMK SULTAN ALAUDDIN	31	Female	Malay	Degree	Married	No	2	2	Inadequate	6	7	2826	120	No	No	74	Abdominal obese	2	14	12	4.8	107	78	4.4	0.5	1.8	2.37	Healthy	Healthy
160	109.172	1_Johor	SMK SULTAN ALAUDDIN	30	Female	Malay	Degree	Single	No	0	2	Inadequate	6	6	720	180	No	No	92	No	10	8	8	4.9	129	87	5.8	1.6	1.1	3.97	Healthy	Healthy
161	109.172	1_Johor	SMK SULTAN ALAUDDIN	34	Male	Malay									0				80	Abdominal obese				4.6	104	63	4.8	0.6	1.2	3.33	Healthy	Healthy
162	109.172	1_Johor	SMK SULTAN ALAUDDIN	48	Male	Malay	Degree	Married	Yes	4	7	Adequate	5	6	1485		No	No	106	No	0	6	8	5	156	87	5.9	1.4	1.4	3.86	Healthy	Healthy
163	109.172	1_Johor	SMK SULTAN ALAUDDIN	49	Male	Malay	Secondary	Married	No						1440		No	No	80	Abdominal obese				4.8	134	75	5.9	0.8	1.2	4.34	Healthy	Healthy
164	109.172	1_Johor	SMK SULTAN ALAUDDIN	33	Female	Malay	Degree	Married	No	2	2	Inadequate	6	7	2826	120	No	No	83	No	2	16	12	4.7	116		4.8	1.1	1.2	3.1	Healthy	Healthy
165	109.172	1_Johor	SMK SULTAN ALAUDDIN	34	Male	Malay	Master and above	Married	Yes	1	1	Inadequate	6	6	0	480	No	No	102	No	6	10	14	5.5	124	76	5.4	1.1	1.2	3.7	Healthy	Healthy
166	109.172	1_Johor	SMK SULTAN ALAUDDIN	41	Female	Malay	Degree	Married	Yes	0	1	Inadequate	6	5	4638	360	No	No	102	No	4	8	10	5.3	131	80	5.8	1.3	1.1	4.11	Healthy	Healthy
167	109.172	1_Johor	SMK SULTAN ALAUDDIN	37	Male	Malay	Secondary	Married	No	0	1	Inadequate	8	6	0		Yes	No			14	14	18	5.4	144	99	5	1.6	0.9	3.37	Healthy	Healthy
168	109.172	1_Johor	SMK SULTAN ALAUDDIN	52	Male	Malay	Degree	Married	No	1	2	Inadequate	7	7	6480		No	No	71	Abdominal obese	0	0	0	5	114	79	5	0.5	1.5	3.27	Healthy	Healthy
169	109.172	1_Johor	SMK SULTAN ALAUDDIN	28	Female	Malay	Degree	Single	No	1	0	Inadequate	6	5	1186.5	60	No	No	87	No	8	10	4	5.1	155		4.5	1	1.2	2.85	Healthy	Healthy
170	109.172	1_Johor	SMK SULTAN ALAUDDIN	42	Female	Malay	Degree	Married	Yes	1	2	Inadequate	5	6	4158	360	No	No	80	No	4	8	14	5	118	70	5.8	0.8	1.6	3.84	Healthy	Healthy
171	109.172	1_Johor	SMK SULTAN ALAUDDIN	39	Female	Malay	Degree	Married	No	2	1	Inadequate	5	5	4053	120		No	85	No	0	6	2	5.2	110	78	5	0.6	1.6	3.13	Healthy	Healthy
172	109.172	1_Johor	SMK SULTAN ALAUDDIN	31	Female	Malay	Degree	Married	Yes	0	1	Inadequate	5	7	1893	30	No	No	89	No	0	6	6	5.2	105	66	5.4	0.5	1.4	3.77	Healthy	Healthy
173	109.172	1_Johor	SMK SULTAN ALAUDDIN	34	Male	Malay	Master and above	Married	Yes	2	1	Inadequate	8	7	4518	60	No	No	87	Abdominal obese	2	10	4	5.2	113	66	4.6	1.4	1	2.96	Healthy	Healthy
174	109.172	1_Johor	SMK SULTAN ALAUDDIN	33	Female	Malay	Degree	Married	No	0	7	Inadequate	6	6	2493	20	No	No	67	Abdominal obese	4	10	6	4.9	124	81	4.8	0.8	1.4	3.04	Healthy	Healthy
175	109.172	1_Johor	SMK SULTAN ALAUDDIN	41	Female	Malay	Degree	Divorced	Yes	1	0	Inadequate	8	8	0	120	No	No	99	No	0	4	8	4.7	132	97	4.4	1.9	1.2	2.34	Healthy	Healthy
176	109.172	1_Johor	SMK SULTAN ALAUDDIN	58	Male	Malay									0				95	No				9.8	100	63	5	1.9	0.9	3.24	Undiagnosed T2DM
177	109.172	1_Johor	SMK SULTAN ALAUDDIN	37	Female	Malay	Degree	Married	Yes	1			4	5	2358	180	No	No	91	No	2	4	6	5.1	102	67	4.9	1.1	1.2	3.2	Healthy	Healthy
178	109.172	1_Johor	SMK SULTAN ALAUDDIN	54	Male	Malay	Degree	Married	No	0	7	Inadequate	4	4	7470	600	Yes	No	94	No	22	18	22	5.1	118	81	4.9	2.5	0.9	2.86	Healthy	Healthy
179	109.172	1_Johor	SMK SULTAN ALAUDDIN	29	Female	Malay	Secondary	Married	Yes	3	3	Adequate	5	6	5838	180	No	No	70	Abdominal obese	0	4	4	4.2	108	66	5	0.7	1.6	3.08	Healthy	Healthy
180	109.172	1_Johor	SMK SULTAN ALAUDDIN	43	Female	Malay	Degree	Married	Yes	1	0	Inadequate	5	5	345		No	No	83	No	0	0	4	4.6	121	70	4.8	1	1.2	3.15	Healthy	Healthy
181	109.172	1_Johor	SMK SULTAN ALAUDDIN	28	Female	Malay	Secondary	Married	Yes	1	1	Inadequate	6	7	720	30	No	No	76	Abdominal obese	10	14	8	4.8	110	63	4.3	0.6	1.3	2.73	Healthy	Healthy
182	109.172	1_Johor	SMK SULTAN ALAUDDIN	49	Female	Malay	Degree	Married	Yes	1	2	Inadequate	6	7	0	300	No	Yes	78	Abdominal obese	4	10	12	5.8	123	85	5.7	1.2	1.3	3.86	Healthy	Impaired fasting glucose
183	109.172	1_Johor	SMK SULTAN ALAUDDIN	54	Female	Malay	Diploma	Married	Yes	1	1	Inadequate	6	7	2019	60	No	No	68	Abdominal obese	0	0	4	4.9	120	74	5.8	1	1.9	3.45	Healthy	Healthy
184	109.172	1_Johor	SMK SULTAN ALAUDDIN	25	Female	Malay									0				83	No				4.7	129	77	4.4	0.8	1.3	2.74	Healthy	Healthy
185	109.172	1_Johor	SMK SULTAN ALAUDDIN	36	Female	Malay	Degree	Married	Yes	0	1	Inadequate			1314		No	No	98	No	8	4	14	5.1	113	73	3.7	0.6	1.4	2.03	Healthy	Healthy
186	109.172	1_Johor	SMK SULTAN ALAUDDIN	49	Female	Malay	Degree	Divorced	Yes	2	4	Adequate	8	8	1920	180	No	No	93	No	14	12	12	5.9	121	76	6.6	1.2	1.5	4.56	Healthy	Impaired fasting glucose
187	109.172	1_Johor	SMK SULTAN ALAUDDIN	40	Female	Malay	Degree	Married	Yes	0	1	Inadequate	6	7	2640	60	No	No	76	Abdominal obese	6	0	10	4.7	134	83	5.6	1.3	1.4	3.61	Healthy	Healthy
188	243.738	1_Johor	SMK TAMAN TUN AMINAH	47	Female	Malay	Degree	Married	Yes	1	7	Inadequate	6	6	594	300	No	No	88	No	8	10	12	6.4	125	88	3.7	0.5	0.9	2.57	Undiagnosed T2DM
189	243.738	1_Johor	SMK TAMAN TUN AMINAH	25	Female	Malay									0				79	Abdominal obese				4.8	132	88	5.2	0.5	1.8	3.17	Healthy	Healthy
190	243.738	1_Johor	SMK TAMAN TUN AMINAH	28	Female	Malay	Degree	Married	Yes	1	1	Inadequate	8	9	2142	10		No	80	No	0	2	4	4.7	114	73	4.8	0.9	1.3	3.09	Healthy	Healthy
191	243.738	1_Johor	SMK TAMAN TUN AMINAH	34	Female	Other races	Degree	Married	Yes	1	1	Inadequate	5	6	1398	180	No	No	104	No	0	4		5	139	89	6.6	2.2	1.4	4.2	T2DM
192	243.738	1_Johor	SMK TAMAN TUN AMINAH	36	Female	Indian									0				72	Abdominal obese				4.9	119	88	6.5	1.2	1.3	4.66	Healthy	Healthy
193	243.738	1_Johor	SMK TAMAN TUN AMINAH	41	Female	Indian	Degree	Married	No	1	3	Inadequate	5	6	247.5	60	No	No	84	No	0	2	8	5.7	137	77	5.9	1.3	1.2	4.11	Healthy	Impaired fasting glucose
194	243.738	1_Johor	SMK TAMAN TUN AMINAH	59	Male	Indian	Degree	Married	Yes	2	2	Inadequate	6	7	8097	330	Yes	Yes	98	No	14	12	14	8.1	127	85	4.8	1.4	1.2	2.96	T2DM
195	243.738	1_Johor	SMK TAMAN TUN AMINAH	28	Male	Malay	Degree	Married	No	1	1	Inadequate		4	6720	480	Yes	No	103	No	0	2	4	4.8	149	92	5.7	0.8	1.6	3.74	Healthy	Healthy
196	243.738	1_Johor	SMK TAMAN TUN AMINAH	33	Female	Malay	Degree	Married	No	1	2	Inadequate	5	6	0		No	No	76	Abdominal obese	6	8	12	4.3	135	81	4.8	0.8	1.4	3.04	Healthy	Healthy
197	243.738	1_Johor	SMK TAMAN TUN AMINAH	52	Female	Chinese	Master and above	Married	No	2	1	Inadequate	6	9	2772	300	No	No	64	Abdominal obese	8	8	12	5.5		72	5.5	0.6	2.3	2.93	Healthy	Healthy
198	243.738	1_Johor	SMK TAMAN TUN AMINAH	43	Female	Malay	Degree	Married	No	1	1	Inadequate	7	8	0	160	No	No	80	No	6	8	10	4.6	119	72	5.1	0.6	1.6	3.23	Healthy	Healthy
199	243.738	1_Johor	SMK TAMAN TUN AMINAH	38	Female	Malay	Degree	Married	No	1	1	Inadequate	6	7	1116		No	No	81	No	6	8	16	4.6	116	73	4.6	0.8	1.7	2.54	Healthy	Healthy
200	243.738	1_Johor	SMK TAMAN TUN AMINAH	34	Male	Malay	Degree	Married	Yes	0			5	5	2118	120	No	No	103	No		2	2	5	130	80	4.7	1.5	1.1	2.92	Healthy	Healthy
201	243.738	1_Johor	SMK TAMAN TUN AMINAH	34	Male	Indian									0				109	No				5.1	139	85	4.7	1.8	0.9	2.98	Healthy	Healthy
202	243.738	1_Johor	SMK TAMAN TUN AMINAH	40	Male	Malay									0				88	Abdominal obese				4.9	129	87	4.4		0.9		Healthy	Healthy
203	243.738	1_Johor	SMK TAMAN TUN AMINAH	36	Male	Malay	Degree	Single	Yes	1	1	Inadequate	6	7	2142	10	No	No	71	Abdominal obese	0	2	4	4.9	135	92		0.7	0.9	1.88	Healthy	Healthy
204	243.738	1_Johor	SMK TAMAN TUN AMINAH	40	Female	Indian	Degree	Married	Yes	1	2	Inadequate	8	9	198		No	No	79	Abdominal obese	2		4	5	117	80	7.1	1.1	2.2	4.4	Healthy	Healthy
205	243.738	1_Johor	SMK TAMAN TUN AMINAH	33	Female	Malay	Degree	Single	No	0	0	Inadequate	6	7	0	120		No	77	Abdominal obese	4	12	12	5.3	137	97	4.8	1	1.2	3.15	Healthy	Healthy
206	243.738	1_Johor	SMK TAMAN TUN AMINAH	42	Female	Malay	Degree	Married	No	1	0	Inadequate	5	8	1040	270	No	No	74	Abdominal obese	8	0	4	4.4	127	80	5.3	0.7	1.9	3.08	Healthy	Healthy
207	243.738	1_Johor	SMK TAMAN TUN AMINAH	32	Female	Malay	Degree	Married	Yes	0	1	Inadequate	6	7	0		No	No	102	No	10	10	12	5.2	136	86	8.1	1.4	1.8	5.66	Healthy	Healthy
208	243.738	1_Johor	SMK TAMAN TUN AMINAH	34	Male	Malay									0				92	No				4.7	122	79	4.3	0.8	1	2.94	Healthy	Healthy
209	243.738	1_Johor	SMK TAMAN TUN AMINAH	26	Female	Malay	Degree	Married	Yes	1	1	Inadequate	7	7	0		No	No	80	No	8	2	8		99	71		1.1	0.9	1.7	Healthy	Healthy
210	243.738	1_Johor	SMK TAMAN TUN AMINAH	47	Female	Malay	Degree	Married	Yes	0	1	Inadequate	4	5	5265	180	No	No	85	No	4	6	4	5	128	75	4.7	1.2	1.3	2.86	Healthy	Healthy
211	243.738	1_Johor	SMK TAMAN TUN AMINAH	34	Female	Malay	Degree	Married	Yes	3	2	Inadequate	7	7	360		No	No	81	No	8	10	14	4.8	127	85	4.7	0.6	1.2	3.23	Healthy	Healthy
212	243.738	1_Johor	SMK TAMAN TUN AMINAH	37	Female	Malay		Married	Yes	1	0	Inadequate	8		0	30	No	No	107	No	0	0	0	4.7	134	84	5.5	1.5	1	3.82	Healthy	Healthy
213	243.738	1_Johor	SMK TAMAN TUN AMINAH	30	Female	Malay	Degree	Married	Yes	0	1	Inadequate	6	7	219	120	No	No	74	Abdominal obese	4	8	8	4.5	115	75	5.8	0.8	1.6	3.84	Healthy	Healthy
214	243.738	1_Johor	SMK TAMAN TUN AMINAH	29	Female	Malay									0				84	No				4.3	126	85	4.7	1.1	1.8	2.4	Healthy	Healthy
215	243.738	1_Johor	SMK TAMAN TUN AMINAH	46	Female	Chinese	Degree	Married	No	0			7	8	4878		No	No	79	Abdominal obese	14	16	16	5.2	127	88	5.3	0.9	1.5	3.39	Healthy	Healthy
216	243.738	1_Johor	SMK TAMAN TUN AMINAH	50	Female	Chinese	Degree	Married	No	1	0	Inadequate	6	7	693	300	No	No	73	Abdominal obese	6	0	6	5.2	127	84	6	0.9	2	3.59	Healthy	Healthy
217	123.368	1_Johor	SMK SRI PERHENTIAN	46	Female	Malay	Degree	Married	Yes	1			5	6	1485	180	No	No	73	Abdominal obese	0	0	6	4.9	141	74	5.9	0.8	1.7	3.84	Healthy	Healthy
218	123.368	1_Johor	SMK SRI PERHENTIAN	44	Female	Malay	Degree	Married	No	1	1	Inadequate			1786.5	240	No	No	72	Abdominal obese	0	10	4	4.8	105	60	5.9	0.7	2.1	3.48	Healthy	Healthy
219	123.368	1_Johor	SMK SRI PERHENTIAN	26	Female	Chinese	Degree	Single	Yes	1	1	Inadequate	6	8	660		No	No	82	No	18	22	26	5	130	74	3.7	0.6	1	2.43	Healthy	Healthy
220	123.368	1_Johor	SMK SRI PERHENTIAN	40	Female	Malay									0				76	Abdominal obese				5.5	166	108	5.4	1.9	1.3	3.24	Healthy	Healthy
221	123.368	1_Johor	SMK SRI PERHENTIAN	42	Female	Chinese	Degree	Married	No	1	1	Inadequate	8	9	0	420	No	No	81	No	10	8	18	5	112	64	5.7	1.3	1.4	3.71	Healthy	Healthy
222	123.368	1_Johor	SMK SRI PERHENTIAN	36	Female	Malay	Master and above	Married	No	0	2	Inadequate	5	6	4110	120	No	No	76	Abdominal obese	0	2	0	4.2	106	62	4.8	0.8	1.4	3.04	Healthy	Healthy
223	123.368	1_Johor	SMK SRI PERHENTIAN	42	Female	Malay	Degree	Married	Yes	1	2	Inadequate	6	7	240	90	No	No	67	Abdominal obese	6	8	8	4.7	104	65	4.9	0.7	2.3	2.28	Healthy	Healthy
224	123.368	1_Johor	SMK SRI PERHENTIAN	42	Female	Malay	Degree	Married	Yes	1	1	Inadequate	6	6	487.5	120	No	No	81	No	6	4	14	6.8	163	105	5.8	1.3	1.2	4.01	T2DM
225	123.368	1_Johor	SMK SRI PERHENTIAN	56	Female	Malay									0				78	Abdominal obese				4.5	128	66	6.2	1.2	1.4	4.26	Healthy	Healthy
226	123.368	1_Johor	SMK SRI PERHENTIAN	41	Female	Malay	Degree	Married	Yes	1	1	Inadequate	5	6	0			No	78	Abdominal obese	4	12	8	4.3	104	67	4	0.5	1.4	2.37	Healthy	Healthy
227	123.368	1_Johor	SMK SRI PERHENTIAN	43	Male	Malay	Degree	Married	No	1	1	Inadequate			1272	180	Yes	No	109	No	10	4	10	5.3	134	78	8	2	1.3	5.79	Healthy	Healthy
228	123.368	1_Johor	SMK SRI PERHENTIAN	55	Female	Malay	Degree	Married	No	1	1	Inadequate	5	6	0		No	No	81	No	0	6	6	6.1	118		5.4	0.5	1.8	3.37	Undiagnosed T2DM
229	123.368	1_Johor	SMK SRI PERHENTIAN	51	Female	Malay	Degree	Married	No	2	2	Inadequate	6	6	7125	90	No	No	86	No	10	12	10	5.8	136	81	5.3	0.8	1.3	3.64	Healthy	Impaired fasting glucose
230	98.99	1_Johor	SMK AIR TAWAR	31	Female	Malay		Married	No				8	9	240		No	No	99	No	10	6	14	5	155	94	6.4	1.2	1.2	4.66	Healthy	Healthy
231	98.99	1_Johor	SMK AIR TAWAR	32	Male	Malay		Married	Yes				7	7	1520		No	No	73	Abdominal obese	2	8	4	4.9	117	72	4.6	0.8	2	2.24	Healthy	Healthy
232	98.99	1_Johor	SMK AIR TAWAR	49	Male	Malay	Degree	Married	Yes	0	1	Inadequate	6	6	1513		No	No	87	Abdominal obese	6	6	6	5.8	141	96	5.7	1.3	1.04	4.07	Healthy	Impaired fasting glucose
233	98.99	1_Johor	SMK AIR TAWAR	29	Male	Malay		Married	Yes				5	6	2160		No	No	91	No	8	10	16	4.6	129	82	5.8	0.6	1.52	4.01	Healthy	Healthy
234	98.99	1_Johor	SMK AIR TAWAR	35	Female	Malay	Master and above	Married	Yes	0	0	Inadequate	6	7	5778	250	No	No	68	Abdominal obese	0	6	4	4.9	114	63	5.7	0.6		2.68	Healthy	Healthy
235	98.99	1_Johor	SMK AIR TAWAR	46	Male	Malay		Married	Yes				7	7	1440		No	No	88.5	Abdominal obese	0	0	0	4.9	117	67	5	1	1.08	3.47	Healthy	Healthy
236	98.99	1_Johor	SMK AIR TAWAR	32	Male	Malay		Married	Yes				7	6	1080		No	No	85	Abdominal obese	0	4	2	5.3	124	67	5.6	0.8	2	3.24	Healthy	Healthy
237	98.99	1_Johor	SMK AIR TAWAR	41	Male	Malay		Married	Yes				5	5	3600		No	No	96.5	No	12	12	18	6.1	128	79	5.8	1.1	1.29	4.01	Undiagnosed T2DM
238	98.99	1_Johor	SMK AIR TAWAR	29	Female	Malay		Married	Yes				7	7	120		No	No	74	Abdominal obese	2	2	4	4.7	105	70	5.4	0.5	1.65	3.52	Healthy	Healthy
239	98.99	1_Johor	SMK AIR TAWAR	49	Female	Malay									0				70	Abdominal obese				5.3	128	69	6.4	0.7	2.12	3.96	Healthy	Healthy
240	98.99	1_Johor	SMK AIR TAWAR	30	Male	Malay		Married	No				6	7	0			No	81	Abdominal obese	0	2	0	6	119	67	4.8	0.5	1.52	3.05	Healthy	Impaired fasting glucose
241	98.99	1_Johor	SMK AIR TAWAR	36	Male	Malay	Degree	Married	Yes	1	1	Inadequate	6	6	198	60	No	No	92	No	2	6	10	4.7	132	95	5.2	0.5	1.78	3.19	Healthy	Healthy
242	98.99	1_Johor	SMK AIR TAWAR	51	Male	Malay									0				95	No				4.6	127	65	5	1.4	0.85	3.51	Healthy	Healthy
243	98.99	1_Johor	SMK AIR TAWAR	36	Male	Malay	Degree	Married	No	1			5	5	0	180	No	No	65	Abdominal obese	4	16	8	4.7	121		5.8	0.8	1.76	3.68	Healthy	Healthy
244	98.99	1_Johor	SMK AIR TAWAR	35	Male	Malay	Degree	Married	No				6	6	165	60	No	No	92	No	2	2	4	5.1	142	87	6.2	1.6	1.35	4.12	Healthy	Healthy
245	98.99	1_Johor	SMK AIR TAWAR	26	Female	Malay									0				69	Abdominal obese				5.4	90	60	6.3	0.7		3.31	Healthy	Healthy
246	960.137	1_Johor	SMK TAMAN DESA TEBRAU	44	Female	Malay	Degree	Married	Yes	1	1	Inadequate	6	6	3816	120	No	No	104	No	2	0	4	4.6	156	87	5.2	1.5	1.1	3.42	Healthy	Healthy
247	960.137	1_Johor	SMK TAMAN DESA TEBRAU	32	Female	Malay	Degree	Married	Yes	0	0	Inadequate	8	8	4746	120	No	No	81	No	4	4	10	5	118	80		0.6	1	2.23	Healthy	Healthy
248	960.137	1_Johor	SMK TAMAN DESA TEBRAU	33	Female	Malay	Degree	Married	Yes	1	1	Inadequate	6	7	0		No	No	63	Abdominal obese	20	26	24	5.1	107	70	4.4	0.8	1.4	2.64	Healthy	Healthy
249	960.137	1_Johor	SMK TAMAN DESA TEBRAU	50	Female	Chinese	Degree	Married	Yes	1			6	6	1687.5	300	No	No	88	No	10	8	10	4.7	129	74	4.6	1.7	1	2.83	Healthy	Healthy
250	960.137	1_Johor	SMK TAMAN DESA TEBRAU	28	Female	Malay	Degree	Single	No	0	1	Inadequate	6	7	1920		No	No	74	Abdominal obese	16	24	16	5.3	125	87	4.4	0.8	1.7	2.34	Healthy	Healthy
251	960.137	1_Johor	SMK TAMAN DESA TEBRAU	25	Female	Malay	Degree	Single	Yes	1	4	Inadequate	4	6	5580	260	No	No	77	Abdominal obese	4	4	2	4.4	126	82	5.2	1.6	1.5	2.97	Healthy	Healthy
252	960.137	1_Johor	SMK TAMAN DESA TEBRAU	24	Female	Malay									0				63	Abdominal obese				4.7	96	65	5.4	0.7	1.6	3.48	Healthy	Healthy
253	960.137	1_Johor	SMK TAMAN DESA TEBRAU	24	Female	Malay	Degree	Single	No	1	2	Inadequate	9	6	1710	120	No	No	69	Abdominal obese	8	6	8	4.3	118	68	4.5	0.6	1.6	2.63	Healthy	Healthy
254	960.137	1_Johor	SMK TAMAN DESA TEBRAU	33	Female	Malay	Degree	Single	No	1	1	Inadequate	5	7	233	120	No	No	72	Abdominal obese	0	2	4	4.6	118	73	6	0.7	2	3.68	Healthy	Healthy
255	72.899	1_Johor	SMK AYER BALOI	46	Female	Malay	Degree	Married	No	1	1	Inadequate	6	7	693	120		No	69	Abdominal obese	4	6	8	5.1	115	68	5.8	1	1.4	3.95	Healthy	Healthy
256	72.899	1_Johor	SMK AYER BALOI	34	Female	Malay	Degree	Married	Yes	0	1	Inadequate	7	7	1800	267	No	No	70	Abdominal obese	2	8	8	5.2	110	71	5	0.6	1.4	3.33	Healthy	Healthy
257	72.899	1_Johor	SMK AYER BALOI	47	Female	Malay	Degree	Married	Yes	0	1	Inadequate	5	6	1440		No	No	82	No	0	0	2	6.1	136	82	5.4	1	1.5	3.45	Undiagnosed T2DM
258	72.899	1_Johor	SMK AYER BALOI	45	Female	Malay	Degree	Married	Yes	0	1	Inadequate	6	6	720	840		No	79	Abdominal obese	0	4	2	5.1	147	73	4.9	0.7	1.4	3.18	Healthy	Healthy
259	72.899	1_Johor	SMK AYER BALOI	50	Female	Malay	Degree	Married	Yes	1			5	5	918	180	No	No	78	Abdominal obese	0	4	4	5.2	119	64	5.6	0.5	2.3	3.07	Healthy	Healthy
260	72.899	1_Johor	SMK AYER BALOI	54	Female	Malay	Degree	Married	No	1	2	Inadequate	5	6	2019	180	No	No	65	Abdominal obese	2	8	8	4.7	133	70	4	0.7	1.1	2.58	Healthy	Healthy
261	72.899	1_Johor	SMK AYER BALOI	32	Female	Malay	Degree	Married	Yes	0	2	Inadequate	8	7	720	240	No	No	62	Abdominal obese	4	2	4	4.6	107	71	5.2	0.5	1.6	3.37	Healthy	Healthy
262	72.899	1_Johor	SMK AYER BALOI	38	Male	Malay	Degree	Married	No	2			6	6	5370	180	No	No	115	No	4	0	2	6.2	153	94	5.9	1	1.6	3.85	Undiagnosed T2DM
263	72.899	1_Johor	SMK AYER BALOI	54	Male	Malay	Degree	Married	No	0	1	Inadequate	5	6	180		Yes	No	91	No	0	0	0	6.2	146	90	5.4	1.7	1.1	3.53	Undiagnosed T2DM
264	72.899	1_Johor	SMK AYER BALOI	39	Male	Malay	Degree	Married	Yes	1	1	Inadequate	8	9	1092	180	No	No	94	No	8	16	18	4.9	127	82	5.1	1.3	1.4	3.11	Healthy	Healthy
265	72.899	1_Johor	SMK AYER BALOI	28	Female	Malay	Degree	Married	No	5			6	6	1271	300	No	No	60	Abdominal obese	4	2	4	4.4	108	74	4.1	0.8	1.3	2.44	Healthy	Healthy
266	72.899	1_Johor	SMK AYER BALOI	51	Female	Malay	Degree	Married	No	1	7	Inadequate	6	5	537	780		No	97	No	8	12	14	5.3	146	74	5.4	1.3	1.1	3.71	Healthy	Healthy
267	72.899	1_Johor	SMK AYER BALOI	46	Male	Malay	Degree	Married	Yes	0	2	Inadequate	5	5	3870	120		No	99	No	4	8	6	10.1	125	85	5		1.1	2.4	T2DM
268	72.899	1_Johor	SMK AYER BALOI	51	Female	Malay	Degree	Married	Yes	0	1	Inadequate	7	7	819	120	No	No	95	No	4	6	12	5.8	124	76	7.8	2.1	1.5	5.35	Healthy	Impaired fasting glucose
269	72.899	1_Johor	SMK AYER BALOI	42	Female	Malay	Degree	Married	No	0	1	Inadequate	5	7	1572	240	No	No	102	No	6	16	16	5.3	135	95	6.7	1.5	1.4	4.62	Healthy	Healthy
270	72.899	1_Johor	SMK AYER BALOI	30	Male	Malay	Degree	Married	Yes	1	1	Inadequate	5	6	2472	240	No	No	81	Abdominal obese	2	2	4	4.7	135	84	4.4	0.6	1.4	2.73	Healthy	Healthy
271	72.899	1_Johor	SMK AYER BALOI	49	Male	Malay	Degree	Married	Yes	1	1	Inadequate			0		No	No	95	No	2	8	10	7.2	144	75	4.1	1.1	1.4	2.2	T2DM
272	72.899	1_Johor	SMK AYER BALOI	27	Female	Malay	Degree	Single	Yes	0	2	Inadequate	7	6	0	720	No	No	64	Abdominal obese	10	4	20	4.9	122	77	5.7	0.7	1.7	3.68	Healthy	Healthy
273	72.899	1_Johor	SMK AYER BALOI	27	Male	Malay	Degree	Single	Yes	1	2	Inadequate	5	7	1440		No	No	90	No	2	8	8	4.7	124	94	4.7	1.3	1.3	2.81	Healthy	Healthy
274	72.899	1_Johor	SMK AYER BALOI	46	Female	Malay	Degree	Married	No	1	2	Inadequate	6	6	1080		No	No	62	Abdominal obese	2	10	10	4.9	135	77	4.2	0.7	1.4	2.48	Healthy	Healthy
275	72.899	1_Johor	SMK AYER BALOI	44	Female	Malay	Degree	Married	No	0	1	Inadequate	5	6	1470	300	No	No	82	No		0	2	4.9	122	72	4.7	1	1.3	2.95	Healthy	Healthy
276	72.899	1_Johor	SMK AYER BALOI	39	Female	Malay	Degree	Married	Yes	1			6	6	3360		No	No	63	Abdominal obese	4	10	8	4.7	118	73	5.8	1.2	1.7	3.56	Healthy	Healthy
277	111.898	1_Johor	SMK BANDAR T6	43	Female	Malay	Degree	Married	No	1	1	Inadequate	6	8	5118			No	91.5	No	12		8	5.2	124	69	5.8	1.5	1.1	4.02	Healthy	Healthy
278	111.898	1_Johor	SMK BANDAR T6	46	Female	Malay									0				91	No				4.9	123	69	4.5	0.7	1.5	2.68	Healthy	Healthy
279	111.898	1_Johor	SMK BANDAR T6	41	Female	Malay	Degree	Married	No	1	1	Inadequate	6	7	240	120	No	No	63	Abdominal obese	8	6	10	5.2	106	65	5.2	0.8	1.9	2.94	Healthy	Healthy
280	111.898	1_Johor	SMK BANDAR T6	46	Female	Malay	Degree	Married	Yes	1			6	7	0			No	73	Abdominal obese	8	10	20	5.3	124	71	5.2	0.8	1.4	3.44	Healthy	Healthy
281	111.898	1_Johor	SMK BANDAR T6	33	Female	Malay	Degree	Married		1	2	Inadequate			0		No	No	75	Abdominal obese	10	12	16	4.4	105	59	4	0.6	1.6	2.13	Healthy	Healthy
282	111.898	1_Johor	SMK BANDAR T6	33	Female	Malay	Degree	Married	Yes	1	2	Inadequate	4	5	459	30	No	No	78	Abdominal obese	10	10	14	4.9	100	67		0.5	1.5		Healthy	Healthy
283	111.898	1_Johor	SMK BANDAR T6	40	Female	Malay	Degree	Married	No	1	1	Inadequate	7	8	1152	180	No	No	76	Abdominal obese	6	2	2	5	126	74	5.4	0.8	1.6	3.44	Healthy	Healthy
284	111.898	1_Johor	SMK BANDAR T6	41	Female	Malay	Degree	Married	No				6	8	0			No	75	Abdominal obese	8	12	16	4.7	124	75	5.2	1.7	1.4	3.03	Healthy	Healthy
285	111.898	1_Johor	SMK BANDAR T6	30	Female	Malay	Degree	Single	Yes	0	1	Inadequate	6	7	198		No	No	80	No				5.6	129	86	6.4	1.6	1.3	4.37	Healthy	Impaired fasting glucose
286	111.898	1_Johor	SMK BANDAR T6	25	Female	Malay	Degree	Married	No	1	1	Inadequate	8	8	3210		No	No	67	Abdominal obese	10	16	18	4.9	137	84	5.4	0.8	1.3	3.74	Healthy	Healthy
287	111.898	1_Johor	SMK BANDAR T6	44	Female	Malay	Degree	Married	Yes	2	2	Inadequate	5	6	6426	60	No	No	69	Abdominal obese	4	4	12	4.6	116	75	4.1	0.4	1.3	2.62	Healthy	Healthy
288	111.898	1_Johor	SMK BANDAR T6	44	Female	Malay	Degree	Married	No	1	3	Inadequate	4	5	1746	120	No	No	75	Abdominal obese	0	0	4	4.3	113	72	4.8	1		2.45	Healthy	Healthy
289	111.898	1_Johor	SMK BANDAR T6	31	Female	Malay	Degree	Married	Yes	1	1	Inadequate	6	7	591	360		No	68	Abdominal obese	0	4	4	4.7	114	77	4.3	0.6	1.6	2.43	Healthy	Healthy
290	111.898	1_Johor	SMK BANDAR T6	39	Female	Malay	Degree	Married	No	0	1	Inadequate	6	7	904	80	No	No	83	No	12	16	16	5.5	124	84	6.3	1.7	1.2	4.33	Healthy	Healthy
291	111.898	1_Johor	SMK BANDAR T6	27	Female	Malay	Degree	Single	Yes	1	1	Inadequate	7	7	2026.5	30		No	68	Abdominal obese	10	10	14	4.5	102	65	5.4	0.9	1.9	3.09	Healthy	Healthy
292	111.898	1_Johor	SMK BANDAR T6	36	Female	Malay	Degree	Married	No	1	1	Inadequate	5	6	4398	20	No	No	94	No	0	0	2	5.6	110	61	5.3	1	1.4	3.45	Healthy	Impaired fasting glucose
293	111.898	1_Johor	SMK BANDAR T6	40	Female	Malay	Master and above	Married	Yes	1	2	Inadequate	6	7	4182	240	No	No	77	Abdominal obese	14	20	22	5	126	75	4.2	0.5	1.5	2.47	Healthy	Healthy
294	111.898	1_Johor	SMK BANDAR T6	55	Female	Malay	Degree	Married		4	7	Adequate	5	6	960	540		No	80	No				5.1	118	64	6.4		1.9	4.14	Healthy	Healthy
295	111.898	1_Johor	SMK BANDAR T6	28	Female	Malay	Degree	Married	Yes	0	2	Inadequate	7	7	2274		No	No	64.5	Abdominal obese	8	4	14	4.6	92	60	3.8	0.4	1.4	2.22	Healthy	Healthy
296	111.898	1_Johor	SMK BANDAR T6	29	Female	Malay	Degree	Married	No	1	1	Inadequate	8	8	180	120	No	No	67	Abdominal obese	8	14	12	4.5				0.5	1.3	1.97	Healthy	Healthy
297	111.898	1_Johor	SMK BANDAR T6	46	Female	Malay	Degree	Married	Yes	1	1	Inadequate	6	7	0	330	No	No	80	No	6	8	14	8.5	156	89	5.8	1.6	1.2	3.87	T2DM
298	111.898	1_Johor	SMK BANDAR T6	50	Female	Malay	Degree	Married	Yes	0	1	Inadequate	6	6	1626	240	No	No	103	No	4	4	6	9.9	135	79	8.1	2	1.6	5.59	T2DM
299	111.898	1_Johor	SMK BANDAR T6	33	Male	Malay									0				115	No				4.3	112	74	6	1.5	1.2	4.12	Healthy	Healthy
300	111.898	1_Johor	SMK BANDAR T6	33	Female	Malay	Degree	Married	No	1	1	Inadequate	8	7	1440	60	No	No	60	Abdominal obese	6	8	12	4.5	102	69	4	0.5	1.5	2.27	Healthy	Healthy
301	111.898	1_Johor	SMK BANDAR T6	28	Female	Malay	Degree	Married	No				7	8	3546		No	No	79	Abdominal obese	2	2	6	4.9			5.3	1.1	1.5	3.3	Healthy	Healthy
302	111.898	1_Johor	SMK BANDAR T6	30	Male	Malay	Degree	Married	Yes	1	1	Inadequate	6	7	240		No	No	100	No	8	8	10	4.9	146	80	5.4	2	1.2	3.29	Healthy	Healthy
303	111.898	1_Johor	SMK BANDAR T6	38	Female	Malay									0				95	No				4.7	151	88	5.1	2.1	1.4	2.75	Healthy	Healthy
304	111.898	1_Johor	SMK BANDAR T6	49	Male	Malay	Degree	Married	No		0		5	4	1812	60	No	No	96	No	6	8	2	5	118	71	5.7	1.9	1	3.84	Healthy	Healthy
305	111.898	1_Johor	SMK BANDAR T6	39	Male	Malay	Diploma	Married	Yes	0	1	Inadequate	7	7	4320	300	No	No	103	No	4	6	6	8.5	134	87	5.3	1.6	1.4	3.17	Undiagnosed T2DM
306	111.898	1_Johor	SMK BANDAR T6	33	Male	Malay	Degree	Married	Yes	1	1	Inadequate	7	8	4434	120	Yes	No	89	Abdominal obese		14	16	5.1	119	72	5.8	2.4	0.9	3.81	Healthy	Healthy
307	111.898	1_Johor	SMK BANDAR T6	28	Female	Malay	Degree	Married	No	0	1	Inadequate	7	8	396	120	No	No	66.5	Abdominal obese	2	2	10		126	77	6.7	1	2.3	3.95	Healthy	Healthy
308	111.898	1_Johor	SMK BANDAR T6	47	Female	Malay	Degree	Married	No	0	1	Inadequate	8	8	1116	120	No	No	90.5	No	0	2	8	13.5	149	89	6.6	2.2	1.3	4.3	T2DM
309	111.898	1_Johor	SMK BANDAR T6	26	Male	Malay	Degree	Married	Yes	1	1	Inadequate	6	6	1755	100		No	81	Abdominal obese	0	0	0	4.2	108	68	4.7	1	1.1	3.15	Healthy	Healthy
310	111.898	1_Johor	SMK BANDAR T6	39	Female	Malay	Degree	Married		0	1	Inadequate	5	5	1440	840		No	70	Abdominal obese	2	4	8	4.4	128	76	5.2	0.6	1.2	3.73	Healthy	Healthy
311	181.169	1_Johor	SMK LKTP BELITONG	36	Female	Malay	Degree	Married	No	0			6	7	480			No	76	Abdominal obese			2	5.1	135	89	5.6	1.4	1.68	3.28	Healthy	Healthy
312	181.169	1_Johor	SMK LKTP BELITONG	37	Male	Malay	Degree	Married	Yes	0	1	Inadequate	5	5	720	60	No	No	93	No	0	8	12	5.1	136	77		3	0.78		Healthy	Healthy
313	181.169	1_Johor	SMK LKTP BELITONG	46	Female	Malay	Diploma	Divorced	No	1	1	Inadequate	5	8	0	60	No	No	83	No	6	4	8	5.1	130	87	5.1	0.9	1.44	3.25	Healthy	Healthy
314	181.169	1_Johor	SMK LKTP BELITONG	41	Female	Malay	Degree	Married	Yes	1	1	Inadequate	7	7	1680	60	No	No	102	No	0	8	12	5.8	140	80	4.9	1.6	1.33	2.84	Healthy	Impaired fasting glucose
315	181.169	1_Johor	SMK LKTP BELITONG	29	Female	Malay	Degree	Married	No	0	0	Inadequate	6	7	1365	120	No	No	69	Abdominal obese	6	6	8	4.6	124	69	4.7	0.6	1.4	3.03	Healthy	Healthy
316	181.169	1_Johor	SMK LKTP BELITONG	42	Male	Malay	Degree	Married	No	1	1	Inadequate	4	5	2613	210	No	No	102	No	0	4	4	6.1	147	102	5.2	1.4	0.99	3.57	Undiagnosed T2DM
317	181.169	1_Johor	SMK LKTP BELITONG	30	Female	Malay	Degree	Married	Yes	0	1	Inadequate	7		693	240	No	No	87	No	16	20	26	5.1	124	75	3.9	0.8	1.25	2.29	Healthy	Healthy
318	181.169	1_Johor	SMK LKTP BELITONG	28	Female	Malay									0				93	No				4.3	125	88	4.8	1.3	1.45	2.76	Healthy	Healthy
319	181.169	1_Johor	SMK LKTP BELITONG	50	Female	Malay	Degree	Divorced	No	0	1	Inadequate	5	5	4638	120	No	No	68	Abdominal obese	4	20	10	5.1	155	109	5.3	0.7	1.94	3.04	Healthy	Healthy
320	181.169	1_Johor	SMK LKTP BELITONG	30	Male	Malay									0				100	No				5.2	138	81	6.3	2.4	1.35	3.86	Healthy	Healthy
321	181.169	1_Johor	SMK LKTP BELITONG	43	Female	Malay	Degree	Married	Yes				5	6	1893	120	No	No	83.5	No	4	6	8	5	154	100	6.2	1	1.23	4.52	Healthy	Healthy
322	181.169	1_Johor	SMK LKTP BELITONG	30	Male	Malay	Degree	Married	No	0	1	Inadequate	6	6	1146	90	Yes	No	86	Abdominal obese	0	0	0	4.8	136	92	5.3	1.6	0.95	3.62	Healthy	Healthy
323	181.169	1_Johor	SMK LKTP BELITONG	46	Female	Malay	Degree	Married	No	1	2	Inadequate	5		9198	300	No	No	81	No	6	10	10	4.6	135	78	5.1	1.7	1.34	2.99	Healthy	Healthy
324	181.169	1_Johor	SMK LKTP BELITONG	41	Female	Malay	Degree	Married	No	10			6	6	1080		No	No	99	No	6	4		5.1	142	76	5.5	0.7	1.49	3.69	Healthy	Healthy
325	181.169	1_Johor	SMK LKTP BELITONG	33	Female	Malay	Degree	Married	Yes	0	1	Inadequate	6	7	4419	60		No	76	Abdominal obese	0	4	8	5.2	131	91	5.1	0.8	1.34	3.4	Healthy	Healthy
326	181.169	1_Johor	SMK LKTP BELITONG	30	Female	Malay	Degree	Married	No	1	1	Inadequate	8	7	4292	480	No	No	85	No	4	4	4	4.8	123	84	5.1	0.9	1.44	3.25	Healthy	Healthy
327	181.169	1_Johor	SMK LKTP BELITONG	26	Female	Malay	Degree	Single	Yes	1	1	Inadequate	5	5	4132	480	No	No	70	Abdominal obese	4	6	6	4.6	120	79	6	0.7	1.31	4.37	Healthy	Healthy
328	181.169	1_Johor	SMK LKTP BELITONG	49	Female	Malay	Degree	Married	No	1	1	Inadequate	6	6	1800		No	No	83	No	4	10	4	5	127	73	4.6	0.7	1.29	2.99	Healthy	Healthy
329	181.169	1_Johor	SMK LKTP BELITONG	40	Female	Malay									0				73	Abdominal obese				4.3	138	76	5.1	0.7	2.06	2.72	Healthy	Healthy
330	181.169	1_Johor	SMK LKTP BELITONG	48	Male	Malay	Degree	Married	No	1	1	Inadequate	6	6	0		No	No	86	Abdominal obese	6	10	6	5.2	160	90	6.4	1	1.48	4.47	Healthy	Healthy
331	181.169	1_Johor	SMK LKTP BELITONG	54	Female	Malay	Diploma	Married	Yes	1	1	Inadequate	4	6	960			No	84	No	10	18	20	6	122	67	4.9	1.3	1	3.31	Healthy	Impaired fasting glucose
332	64.167	1_Johor	SMK BUKIT GAMBIR	47	Female	Malay	Degree	Married	Yes	1	1	Inadequate	6	7	1440		No	No	80	No	20	8	24	5.8	127	70	4.3	0.8	1.21	2.7	Healthy	Impaired fasting glucose
333	64.167	1_Johor	SMK BUKIT GAMBIR	45	Female	Malay	Degree	Married	Yes	1	1	Inadequate	7	8	339	120	No	No	82	No		20	24	5.4	129	75	5	0.8	1.55	3.09	Healthy	Healthy
334	64.167	1_Johor	SMK BUKIT GAMBIR	56	Male	Chinese	Degree	Married	Yes	1	1	Inadequate	6	6	5733	120	No	No	75.5	Abdominal obese	6	0	8	5.3	117	67	5.7	1	1.48	3.79	Healthy	Healthy
335	64.167	1_Johor	SMK BUKIT GAMBIR	37	Female	Malay	Degree	Married	No	1	2	Inadequate	6	6	1440	60	No	No	71.3	Abdominal obese	4	12	8	5.3	125	78	4.4	0.7	1.59	2.47	Healthy	Healthy
336	64.167	1_Johor	SMK BUKIT GAMBIR	53	Female	Malay	Degree	Married	No	0			6	8	4158	240	No	No	71	Abdominal obese	8	16	12	5	122	71	5.4	0.8	1.36	3.73	Healthy	Healthy
337	64.167	1_Johor	SMK BUKIT GAMBIR	53	Female	Malay	Degree	Married	No	2	2	Inadequate	6	6	0		No	No	80.4	No	4	8	2	5.1	102		5.8	1.6	1.25	3.87	Healthy	Healthy
338	64.167	1_Johor	SMK BUKIT GAMBIR	55	Male	Malay									0				89.5	Abdominal obese				4.9		97	6.8	2.5	1.37	4.24	Healthy	Healthy
339	64.167	1_Johor	SMK BUKIT GAMBIR	29	Male	Malay	Degree	Married	Yes	1	1	Inadequate	6	5	612	40	No	No	90	No	14	14	22	4.6	146	81	5.9		1.09		Healthy	Healthy
340	64.167	1_Johor	SMK BUKIT GAMBIR	37	Female	Malay									0				75	Abdominal obese				5	129	68	6.4	1.6	1.5	4.18	Healthy	Healthy
341	64.167	1_Johor	SMK BUKIT GAMBIR	44	Female	Chinese	Degree	Married	No	4	2	Inadequate	6	8	918	420	No	No	76	Abdominal obese	0	2	0	4.5	134	69	5.8	1.5	2.07	3.07	Healthy	Healthy
342	64.167	1_Johor	SMK BUKIT GAMBIR	42	Female	Malay				0	2	Inadequate			0				97	No				5.3			6.7	1	1.53	4.78	Healthy	Healthy
343	64.167	1_Johor	SMK BUKIT GAMBIR	47	Female	Malay	Degree	Married	No				6	6	0		No	No	68	Abdominal obese	4	2	2	5.4	117	74	5.7	0.8	1.53	3.77	Healthy	Healthy
344	64.167	1_Johor	SMK BUKIT GAMBIR	45	Female	Chinese	Degree	Single	No	1	3	Inadequate	7	8	4128		No	No	68	Abdominal obese	2	8	16	4.3	118	66	4.6	1.9	1.66	2.13	Healthy	Healthy
345	64.167	1_Johor	SMK BUKIT GAMBIR	30	Male	Malay	Degree	Married	No		1		6	7	3840		No	No	82	Abdominal obese	6	18	12	5.2	122	76	5.5	1.1	1.42	3.61	Healthy	Healthy
346	64.167	1_Johor	SMK BUKIT GAMBIR	46	Female	Malay		Married	No	0	1	Inadequate	4	5	1777.5	120	No	No	90	No	6	4	14	4.3	118	67	4.8	1.8	1.08	2.85	Healthy	Healthy
347	64.167	1_Johor	SMK BUKIT GAMBIR	48	Female	Malay	Degree	Married	No	1	1	Inadequate	7	8	1605	480	No	No	70	Abdominal obese	2	2	2	4.9	128	85	6.1	1.7	1.54	3.81	Healthy	Healthy
348	64.167	1_Johor	SMK BUKIT GAMBIR	30	Female	Malay	Degree	Married	Yes	0	1	Inadequate	9		1350		No	No	78	Abdominal obese	16	14	16	4.6	130	78	4.9	0.7	1.59	2.96	Healthy	Healthy
349	64.167	1_Johor	SMK BUKIT GAMBIR	55	Female	Malay	Diploma	Married	Yes	1	3	Inadequate	8	7	0	90	No	No	109	No	12		4	11.8	140	78	4.7	2.2	1.08	2.6	T2DM
350	282.736	1_Johor	SMK TAMAN BUKIT INDAH	49	Female	Chinese	Master and above	Married	No	0	1	Inadequate	4	8	0	300	No	No	78.5	Abdominal obese	24	30	30	6.1	132	82	5.3	0.7	1.3	3.68	T2DM
351	282.736	1_Johor	SMK TAMAN BUKIT INDAH	47	Female	Chinese	Degree	Married	Yes	1	1	Inadequate	6	7	1710	300	No	No	77	Abdominal obese	14	12	16	5.5	120	73	4.8	1.3	1.2	3.01	Healthy	Healthy
352	282.736	1_Johor	SMK TAMAN BUKIT INDAH	34	Female	Malay	Degree	Married	Yes	1	1	Inadequate	6	6	1440	120	No	No	74	Abdominal obese	4	10	6	4.8	121	67	4.7	0.7	1.6	2.78	Healthy	Healthy
353	282.736	1_Johor	SMK TAMAN BUKIT INDAH	29	Female	Chinese	Degree	Married	Yes	0			8	9	219	360	No	No	74	Abdominal obese	8	6	14	5	124	72	5	1.6	1.1	3.17	Healthy	Healthy
354	282.736	1_Johor	SMK TAMAN BUKIT INDAH	33	Female	Malay	Degree	Married	Yes	1	0	Inadequate	5	6	0		No	No	88	No	6	10	14	5.2	120	68	5.1	1.7	1.4	2.93	Healthy	Healthy
355	282.736	1_Johor	SMK TAMAN BUKIT INDAH	53	Female	Chinese	Master and above	Married	Yes	1	1	Inadequate	5	6	1372	240	No	No	78.5	Abdominal obese	4	8	16	7.3	142	75	6.8	1.2	1.6	4.66	T2DM
356	282.736	1_Johor	SMK TAMAN BUKIT INDAH	32	Female	Malay	Secondary	Married	No	1			7	8	0		No	No	72.5	Abdominal obese	6	10	14	4.7	142	89	4.9	1.8	1.8	2.28	Healthy	Healthy
357	282.736	1_Johor	SMK TAMAN BUKIT INDAH	32	Female	Malay	Degree	Married	No	1	2	Inadequate	5	6	0		No	No	82	No	0	0	0	4.9	115	74	3.7	0.7	1.6	1.78	Healthy	Healthy
358	282.736	1_Johor	SMK TAMAN BUKIT INDAH	36	Female	Indian									0				87	No				5.1	113	68	4.7	0.7	1.1	3.28	Healthy	Healthy
359	282.736	1_Johor	SMK TAMAN BUKIT INDAH	37	Female	Indian	Degree	Married	Yes	0	2	Inadequate	6	8	1257		No	No	69	Abdominal obese	8	8	18	4.9	117	79	5.2	1	1.8	2.95	Healthy	Healthy
360	282.736	1_Johor	SMK TAMAN BUKIT INDAH	36	Female	Chinese	Degree	Married	Yes	0	7	Inadequate	6	7	0	90	No	No	87	No	14	12	14	5.6	128	83	4.9	1.2	1.1	3.26	Healthy	Impaired fasting glucose
361	282.736	1_Johor	SMK TAMAN BUKIT INDAH	32	Female	Malay	Degree	Single	No	0	1	Inadequate	6	6	132		No	No	69	Abdominal obese	4	10	12	4.6	100		6	0.9	1.4	4.19	Healthy	Healthy
362	282.736	1_Johor	SMK TAMAN BUKIT INDAH	41	Female	Indian	Master and above	Married	Yes	2	4	Adequate	5	6	412	600	No	No	77	Abdominal obese	6			7.4	129	80	5.1	2.3	1.5	2.56	Undiagnosed T2DM
363	282.736	1_Johor	SMK TAMAN BUKIT INDAH	36	Female	Malay	Degree	Married	Yes	0	1	Inadequate	7	8	960		No	No	84	No	8	6	10	5.8	120	72	5.5	2.7	1	3.27	Healthy	Impaired fasting glucose
364	282.736	1_Johor	SMK TAMAN BUKIT INDAH	34	Male	Malay									0				91	No				6	158	98	4.3	1.3	1	2.71	Healthy	Impaired fasting glucose
365	282.736	1_Johor	SMK TAMAN BUKIT INDAH	31	Female	Malay	Secondary	Single	Yes	2	1	Inadequate	8	8	1314	240	No	No	81	No	0	6	6	5.3	141	81	5.9	1.4	1.4	3.86	Healthy	Healthy
366	282.736	1_Johor	SMK TAMAN BUKIT INDAH	48	Female	Malay	Degree	Married	Yes	0	1	Inadequate	5	5	0		No	No	79	Abdominal obese	2	10	8	7.2	105	74	5.1	2.3	1.2	2.86	T2DM
367	282.736	1_Johor	SMK TAMAN BUKIT INDAH	43	Female	Malay	Degree	Married	No	0			5	6	3450		No	No	73.5	Abdominal obese	0	2	2	4.9	128	65	4.8	0.6	1.9	2.63	Healthy	Healthy
368	282.736	1_Johor	SMK TAMAN BUKIT INDAH	46	Female	Malay	Degree	Married	No	2	2	Inadequate	5	6	3412	240	No	No	84	No	2	6	4	5.1	148	86	5.2	1.3	1.3	3.31	Healthy	Healthy
369	282.736	1_Johor	SMK TAMAN BUKIT INDAH	38	Female	Malay									0				82	No				5	113	76	5.5	1.5	1.2	3.62	Healthy	Healthy
370	282.736	1_Johor	SMK TAMAN BUKIT INDAH	37	Female	Malay	Master and above	Single	Yes	1	2	Inadequate	6	7	1893	840		No	76	Abdominal obese	4	8	6	4.9	110	70	5.8	1.6	1.3	3.77	Healthy	Healthy
371	282.736	1_Johor	SMK TAMAN BUKIT INDAH	35	Female	Chinese	Degree	Married	Yes	1			6	7	546		No	No	68	Abdominal obese	22	20	26	4.8	103	68	5	0.8	1.4	3.24	Healthy	Healthy
372	282.736	1_Johor	SMK TAMAN BUKIT INDAH	39	Male	Malay	Degree	Married	Yes	0	0	Inadequate	6	7	4638	120	Yes	No	113	No	0	4	8	5.5	135	88	4.8	2	1.1	2.79	Healthy	Healthy
373	282.736	1_Johor	SMK TAMAN BUKIT INDAH	32	Female	Malay	Degree	Married	Yes	1	1	Inadequate	8	8	1506		No	No	104	No	2	8	10	5.1	131	82	5.3	1.3	1.3	3.41	Healthy	Healthy
374	282.736	1_Johor	SMK TAMAN BUKIT INDAH	35	Female	Indian									0				71	Abdominal obese				5.2	120	87	3.9	0.4	1.4	2.32	Healthy	Healthy
375	190.179	1_Johor	SMK BANANG JAYA	37	Female	Malay	Degree	Married	No	5			8	8	2880	120	No	No	82.5	No	0	0	2	5.5	145	78	4.6	0.7	1.2	3.08	Healthy	Healthy
376	190.179	1_Johor	SMK BANANG JAYA	39	Female	Malay	Degree	Married	No	0	1	Inadequate	6	7	480		No	No	81	No	6	4	4	4.3	122	74	4.9	0.9	1.6	2.89	Healthy	Healthy
377	190.179	1_Johor	SMK BANANG JAYA	43	Female	Malay	Degree	Married	Yes	1			5	6	0		No	No	87.5	No	6	16	18	4.7	124	76	5.6	1.6	1.3	3.57	Healthy	Healthy
378	190.179	1_Johor	SMK BANANG JAYA	46	Female	Chinese	Degree	Married	No	0	2	Inadequate	7	8	438		No	No	70	Abdominal obese	6	4	10	4.9	115	74	4.9	1.4	1.5	2.76	Healthy	Healthy
379	190.179	1_Johor	SMK BANANG JAYA	58	Male	Malay	Master and above	Married	Yes	0	0	Inadequate	5	6	2550	90	No	No	87	Abdominal obese	2	2	4	11.8	118	64	3.7	2.6	1		T2DM
380	190.179	1_Johor	SMK BANANG JAYA	37	Male	Malay	Degree	Married	No	1	1	Inadequate	6	5	2880		Yes	No	86.4	Abdominal obese	4	6	2	4.6	131	82	5.9		1.2	3.06	Healthy	Healthy
381	190.179	1_Johor	SMK BANANG JAYA	38	Female	Malay	Degree	Married	No	0	1	Inadequate	7	5	5865	90	No	No	79.2	Abdominal obese	0	0	2	4.6	143	91	5.2	1.1	1.3	3.4	Healthy	Healthy
382	190.179	1_Johor	SMK BANANG JAYA	35	Female	Chinese	Degree	Married	No	2			7	8	3159	120	No	No	70	Abdominal obese	0	0	0	4.6	105	63	4.8	1.3	1.4	2.81	Healthy	Healthy
383	190.179	1_Johor	SMK BANANG JAYA	31	Female	Malay	Degree	Married	No	1	0	Inadequate	5	6	600	60	No	No	63	Abdominal obese	4	10	12	4.8	95		3.7	0.9	1.2	2.09	Healthy	Healthy
384	190.179	1_Johor	SMK BANANG JAYA	34	Female	Malay	Degree	Married	Yes	1	1	Inadequate	7	6	699	120	No	No	79	Abdominal obese	12	24	26	6.7	125	83	5.6	2.8	1.2	3.13	Undiagnosed T2DM
385	190.179	1_Johor	SMK BANANG JAYA	41	Female	Malay	Degree	Married	No	2	7	Adequate	6	7	0	360	No	No	105	No	10	16	18	4.7	130	98	5	2.4	1.1	2.81	Healthy	Healthy
386	190.179	1_Johor	SMK BANANG JAYA	41	Female	Chinese	Degree	Single	No	1			7	7	3210	450	No	No	65	Abdominal obese	4	0	2	4.3	114	70	4.8	0.8	1.6	2.84	Healthy	Healthy
387	190.179	1_Johor	SMK BANANG JAYA	47	Male	Malay	Master and above	Married	Yes	1	1	Inadequate	6	6	0	180	No	No	103	No	4	4	8	5.4	127	78	4.1	1.1	1.1	2.5	Healthy	Healthy
388	190.179	1_Johor	SMK BANANG JAYA	47	Female	Chinese	Degree	Single	Yes	1	1	Inadequate	7	9	198		No	No	67	Abdominal obese	2	4	2	5	145	88	6.3	0.8	2	3.94	Healthy	Healthy
389	190.179	1_Johor	SMK BANANG JAYA	40	Female	Malay	Degree	Married	Yes	1	3	Inadequate	5	5	0	240	No	No	67	Abdominal obese	4	8	6	4.8	131	69	5	0.6	1.8	2.93	Healthy	Healthy
390	190.179	1_Johor	SMK BANANG JAYA	48	Male	Malay	Degree	Married	Yes	1	1	Inadequate	7	6	1609.5	240	No	No	95	No	6	8	8	5.7	151	95	6.1	2.8	1.2	3.63	Healthy	Impaired fasting glucose
391	190.179	1_Johor	SMK BANANG JAYA	33	Male	Malay	Degree	Married	No	0	0	Inadequate	4	5	1386	300	No	No	87	Abdominal obese	0	6	4	4.6	128	72	4.7	1.4	1.4	2.66	Healthy	Healthy
392	190.179	1_Johor	SMK BANANG JAYA	32	Female	Malay	Degree	Married	Yes	1	1	Inadequate	6	7	1998	360	No	No	88.5	No	6	6	14	4.1	133	82	4.7	0.7	1.1	3.28	Healthy	Healthy
393	190.179	1_Johor	SMK BANANG JAYA	46	Female	Malay	Degree	Married	Yes	0	0	Inadequate	6	7	480	300	No	No	69.5	Abdominal obese	10	8	14	4.8	110	62	6.5	0.8	2.2	3.94	Healthy	Healthy
394	190.179	1_Johor	SMK BANANG JAYA	32	Male	Malay	Degree	Single	No	0	5	Inadequate	6	8	1440	120	No	No	77	Abdominal obese	10	6	14	4.9	115	66	5.4	0.6	1.6	3.53	Healthy	Healthy
395	190.179	1_Johor	SMK BANANG JAYA	51	Male	Malay	Degree	Married	Yes	1	1	Inadequate	5	6	8730	300	No	No	87	Abdominal obese	12	18	12	5.6	139	81	5.7		1	3.29	Healthy	Impaired fasting glucose
396	190.179	1_Johor	SMK BANANG JAYA	29	Female	Malay	Degree	Married	Yes				6	6	4053	60	No	No	83.5	No	0	4	0	4.9	116	76		1.6	1	1.67	Healthy	Healthy
397	189.444	1_Johor	SMK BULUH KASAP	39	Female	Malay									0				97.5	No				8.5	142	88	5.5	1.7	1.2	3.53	Undiagnosed T2DM
398	189.444	1_Johor	SMK BULUH KASAP	41	Female	Malay									0				97	No				5.4	146	79	5.3	0.9	1.8	3.09	Healthy	Healthy
399	189.444	1_Johor	SMK BULUH KASAP	36	Female	Malay	Degree	Married	No	0	1	Inadequate	5	7	937		No	No	76.5	Abdominal obese	12	16	12	4.8	117	60	5.1	0.5	1.3	3.57	Healthy	Healthy
400	189.444	1_Johor	SMK BULUH KASAP	43	Male	Malay	Degree	Married	Yes	1	2	Inadequate	5	5	0		No	No	92	No	0	4	2	4.8	155	86	5.2	2.5	1	3.06	Healthy	Healthy
401	189.444	1_Johor	SMK BULUH KASAP	40	Female	Malay									0				88	No				4.4	121	79	5.2	1.1	1.6	3.1	Healthy	Healthy
402	189.444	1_Johor	SMK BULUH KASAP	44	Male	Malay	Degree	Married	No	0	1	Inadequate	5	6	1845	60	No	No	108.5	No	4	0	2	6.4		95	5.7	1	1.2	4.05	Undiagnosed T2DM
403	189.444	1_Johor	SMK BULUH KASAP	34	Female	Indian	Degree	Married	Yes	0	0	Inadequate	6	7	1866		No	No	83	No	0	2	12	4.7	120	66	4.1	0.9	1.2	2.49	Healthy	Healthy
404	189.444	1_Johor	SMK BULUH KASAP	43	Female	Malay	Degree	Married	No	0	2	Inadequate	4		1311	30	No	No	80.5	No	12	10	20	4.2	157	62	4.7	1.5	1.2	2.82	Healthy	Healthy
405	189.444	1_Johor	SMK BULUH KASAP	27	Female	Malay	Degree	Married	No	0	1	Inadequate	7	8	66	40	No	No	97	No	4	12	10	4.5	132	76	4.7	1.4	1.2	2.86	Healthy	Healthy
406	189.444	1_Johor	SMK BULUH KASAP	44	Female	Malay	Degree	Married	No	0	1	Inadequate	7	5	2148	180	No	No	79	Abdominal obese	10	14	16	4.8	126	70	5.7	1.9	1.3	3.54	Healthy	Healthy
407	189.444	1_Johor	SMK BULUH KASAP	35	Female	Malay	Degree	Married	Yes	1	1	Inadequate	6	6	1440		No	No	74	Abdominal obese	10	6	10	4.4	120	75	5.2	0.9	1.4	3.39	Healthy	Healthy
408	189.444	1_Johor	SMK BULUH KASAP	40	Female	Malay	Master and above	Married	Yes	1	2	Inadequate	7		3459	120	No	No	80.5	No	2	8	6	4.8	110	71	5.9	1.1	1.8	3.6	Healthy	Healthy
409	51.091	1_Johor	SMK BANDAR MAS	29	Female	Malay	Degree	Single	Yes	0	1	Inadequate	6	8	179	30	No	No	77	Abdominal obese	4	12	6	4.8	136	78	6.2	0.7	1.66	4.18	Healthy	Healthy
410	51.091	1_Johor	SMK BANDAR MAS	34	Female	Malay	Degree	Married	Yes	1	1	Inadequate	6	6	240		No	No	84	No	12	14	14	5.3	118	79	4.3	1.3	1.11	2.55	Healthy	Healthy
411	51.091	1_Johor	SMK BANDAR MAS	52	Male	Malay	Degree	Married	Yes		1		8		6330		No	No	84.5	Abdominal obese	0	2	0	5.4	134	86	7.1	1	1.62	5.01	Healthy	Healthy
412	51.091	1_Johor	SMK BANDAR MAS	51	Male	Malay									0				91.5	No				5	119	67	5	1.8	1.2	2.99	Healthy	Healthy
413	51.091	1_Johor	SMK BANDAR MAS	46	Male	Malay	Degree	Married	No	1	1	Inadequate	7	6	66	120	Yes	No	80	Abdominal obese	14	16	16	4.8	109	68	6.8	1.4	1.32	4.78	Healthy	Healthy
414	51.091	1_Johor	SMK BANDAR MAS	55	Male	Malay									0				99.5	No				5	136	74	3.8	1.1	1.29	2.01	Healthy	Healthy
415	51.091	1_Johor	SMK BANDAR MAS	43	Male	Malay	Degree	Married	Yes	0	0	Inadequate	5	6	120	60	No	No	89.5	Abdominal obese	8	8	2	4.9	142	98	5.2	1	1.01	3.74	Healthy	Healthy
416	51.091	1_Johor	SMK BANDAR MAS	44	Female	Malay	Degree	Married	Yes	1	2	Inadequate	7	8	6480	120	No	No	65	Abdominal obese				4.8	108		5	0.6	1.67	3.01	Healthy	Healthy
417	51.091	1_Johor	SMK BANDAR MAS	46	Female	Malay	Degree	Married	No	1	2	Inadequate	7	7	528		No	No	74	Abdominal obese	0	2	2	5.2	111	67	4.8	0.9	1.8	2.61	Healthy	Healthy
418	51.091	1_Johor	SMK BANDAR MAS	32	Female	Malay	Degree	Married	No	1	2	Inadequate	6	7	486		No	No	67	Abdominal obese	0	0	0	4.6	106	59	4.3	0.5	2.12	1.95	Healthy	Healthy
419	51.091	1_Johor	SMK BANDAR MAS	36	Female	Malay	Degree	Married	Yes	1	1	Inadequate	6	6	0		No	No	82	No	0	0	8	7.5	120	75	6.5	2.5	1.33	4.07	Undiagnosed T2DM
420	51.091	1_Johor	SMK BANDAR MAS	27	Female	Malay	Degree	Married	No	0	2	Inadequate	5	6	120		No	No	83	No	4	6	12	4.7	115	78	6.2	1.6	1.35	4.1	Healthy	Healthy
421	51.091	1_Johor	SMK BANDAR MAS	45	Female	Malay	Degree	Married	No	1	1	Inadequate	5	6	8826	120	No	No	77	Abdominal obese	0	18	8	5.1	128	76	6.2	0.9	1.72	4.05	Healthy	Healthy
422	51.091	1_Johor	SMK BANDAR MAS	43	Female	Malay	Degree	Married	No	1	1	Inadequate	6	8	4158	360	No	No	75	Abdominal obese	0	6	24	4.8	99		4.1	1.3	0.99	2.48	Healthy	Healthy
423	51.091	1_Johor	SMK BANDAR MAS	45	Female	Malay	Degree	Married	Yes	1	1	Inadequate	6	5	0		No	No	71	Abdominal obese	10	6	12	5.4	121	72	6.2	1.3	1.78	3.86	Healthy	Healthy
424	51.091	1_Johor	SMK BANDAR MAS	33	Male	Malay	Degree	Married	Yes	0	1	Inadequate	6	6	0		No	No	100	No	4	10	2	14.9	134	80	5.8	2.6	1.33	3.25	Undiagnosed T2DM
425	51.091	1_Johor	SMK BANDAR MAS	28	Female	Indian	Degree	Single	Yes	0	1	Inadequate	5	7	0		No	No	86	No	0	4	4	5.2	116	68		0.5	1.06	2.09	Healthy	Healthy
426	51.091	1_Johor	SMK BANDAR MAS	45	Female	Malay	Degree	Married	Yes	0	0	Inadequate	6	6	495	60	No	No	71	Abdominal obese	0	4	2	6.4	115	74	6.2	0.8	1.46	4.41	Undiagnosed T2DM
427	51.091	1_Johor	SMK BANDAR MAS	32	Female	Malay	Degree	Married	No	0	2	Inadequate	5	5	0		No	No	76	Abdominal obese	0	2	0	5	106	69	3.9	0.9	1.18	2.3	Healthy	Healthy
428	51.091	1_Johor	SMK BANDAR MAS	54	Male	Malay	Diploma	Single	No	0	0	Inadequate	5	6	405	30	No	No	78	Abdominal obese	0	2	4	5.2	128	76	4.6	0.8	1.58	2.6	Healthy	Healthy
429	51.091	1_Johor	SMK BANDAR MAS	31	Female	Malay	Degree	Single	No	1	1	Inadequate	6	8	1314	30	No	No	100	No	8	6	4	5.2	128	62	6.4	1.5	1.07	4.67	Healthy	Healthy
430	51.091	1_Johor	SMK BANDAR MAS	40	Male	Malay	Degree	Married	Yes	0	1	Inadequate	6	5	4425	180	Yes	No	81	Abdominal obese	6	4	12	4.6	110	75	7.7	2	1.95	4.8	Healthy	Healthy
431	51.091	1_Johor	SMK BANDAR MAS	36	Female	Malay	Degree	Married	Yes	0	1	Inadequate	6	5	396		No	No	71	Abdominal obese	0	0	2	4.3	105	66	3.8	0.5	1.6	1.94	Healthy	Healthy
432	51.091	1_Johor	SMK BANDAR MAS	53	Female	Malay	Secondary		No				6	6	0		No	No	79	Abdominal obese	2	8	10	5.1	174	104	6.2	1.3	1.29	4.32	Healthy	Healthy
433	51.091	1_Johor	SMK BANDAR MAS	46	Male	Malay	Degree	Married	No	0	0	Inadequate	6	6	1650	120	No	No	93	No	6	2	2	5.5	122	76	5.6	1.8	1.04	3.79	Healthy	Healthy
434	51.091	1_Johor	SMK BANDAR MAS	30	Female	Malay	Degree	Married	No	0	1	Inadequate	6	7	120		No	No	66	Abdominal obese	0	2	2	4.6	109	71	3.8	0.5	1.21	2.37	Healthy	Healthy
435	51.091	1_Johor	SMK BANDAR MAS	32	Female	Malay	Degree	Married	No	0	0	Inadequate	6	6	0		No	No	71	Abdominal obese	14	8	16	4.9	99	59	5	0.7	1.64	3.06	Healthy	Healthy
436	51.091	1_Johor	SMK BANDAR MAS	33	Female	Malay		Married	No	0	0	Inadequate	7	8	480	480	No	No	83.5	No	0	6	4	4.8	123	74	5	2	1.02	3.07	Healthy	Healthy
437	51.091	1_Johor	SMK BANDAR MAS	47	Female	Malay	Degree	Married	No	1	2	Inadequate	8	9	693		No	No	73	Abdominal obese	0	0	0	4.4	151	94	5.4	1.9	1.64	2.91	Healthy	Healthy
438	51.091	1_Johor	SMK BANDAR MAS	37	Male	Malay	Master and above	Married	No	1			5	4	4398	240	No	No	114	No	2	6	6	6.6	149	94	6.8		1.4	3.85	Undiagnosed T2DM
439	51.091	1_Johor	SMK BANDAR MAS	52	Female	Malay	Degree	Married	Yes		7		4	5	1440	240	No	No	113	No	8	2	6	11.7	143	89	4.9	1.2	1.43	2.94	T2DM
440	170.909	1_Johor	SMK BUKIT NANING	40	Female	Malay	Degree	Married	Yes	1	1	Inadequate	5	6	2520		No	No	86.1	No	2	4	4	5.6	122	85	4.3	0.7	1.2	2.78	Healthy	Impaired fasting glucose
441	170.909	1_Johor	SMK BUKIT NANING	29	Male	Malay	Degree	Married	No	0	0	Inadequate	6	6	2880	360	Yes	No	83	Abdominal obese	0	2	0	4.8	129	79	4.5	0.6	1.1	3.13	Healthy	Healthy
442	170.909	1_Johor	SMK BUKIT NANING	46	Male	Malay	Degree	Married	Yes	1	1	Inadequate			3870	120			92.6	No				4.7	154	95	5.9		1.1	2.8	Healthy	Healthy
443	170.909	1_Johor	SMK BUKIT NANING	29	Male	Malay	Degree	Married	Yes	1	0	Inadequate	5	6	633	240	No	No	75.5	Abdominal obese	4	18	14	5.1	124	65	4.2	0.5	1.4	2.57	Healthy	Healthy
444	170.909	1_Johor	SMK BUKIT NANING	46	Female	Malay	Degree	Divorced	No	0	2	Inadequate	6	7	1386	240	No	No	69	Abdominal obese				4.5	107	64	5	0.4	2	2.82	Healthy	Healthy
445	170.909	1_Johor	SMK BUKIT NANING	35	Female	Malay	Degree	Married	No	1	1	Inadequate	5	5	5040		No	No	84	No	4	10	12	4.8	125	82	5.3	0.6	2	3.3	Healthy	Healthy
446	170.909	1_Johor	SMK BUKIT NANING	46	Male	Malay	Degree	Married		1	1	Inadequate	5	5	2040		Yes	No	89.1	Abdominal obese	0	0	0	4.5	132	85	6.6	1.3	1.5	4.51	Healthy	Healthy
447	170.909	1_Johor	SMK BUKIT NANING	47	Female	Malay	Degree	Married	Yes	0	1	Inadequate	7	9	280	420	No	No	68	Abdominal obese	4	6	10	4.6	145	81	4.6	1	1.7	2.45	Healthy	Healthy
448	170.909	1_Johor	SMK BUKIT NANING	49	Female	Malay	Degree	Married	Yes	0	1	Inadequate	6	5	480			No	69	Abdominal obese	2		6	5.2	108	70	8	0.8	2.3	5.34	Healthy	Healthy
449	170.909	1_Johor	SMK BUKIT NANING	44	Female	Malay	Degree	Married	No	1	1	Inadequate	7	8	819		No	No	86.5	No	6	8	8	5.5	113		3.6	0.7	1.3	1.98	Healthy	Healthy
450	170.909	1_Johor	SMK BUKIT NANING	28	Female	Malay									0				74	Abdominal obese				5.1	109	62	5.8	1.7	1.5	3.53	Healthy	Healthy
451	170.909	1_Johor	SMK BUKIT NANING	30	Female	Malay	Degree	Married	No	0	1	Inadequate	6	6	360	60	No	No	67	Abdominal obese	2	4	4	4.8	111	79	4.4	0.9	1.4	2.59	Healthy	Healthy
452	170.909	1_Johor	SMK BUKIT NANING	47	Male	Malay	Degree	Married	Yes	1	1	Inadequate	5	6	0		No	No	98.2	No	0	0	0	14.5	166	95	5	1.4	1.1	3.26	T2DM
453	170.909	1_Johor	SMK BUKIT NANING	40	Female	Malay	Degree	Married	No	2	1	Inadequate	6	7	1365	180	No	No	77.8	Abdominal obese	14	14	14	4.6	149	103	6.6	1.6	1.8	4.07	Healthy	Healthy
454	170.909	1_Johor	SMK BUKIT NANING	44	Female	Malay	Degree	Married	No	0	1	Inadequate	6	6	480	180	No	No	77.5	Abdominal obese	8	6	8	5.3	147	74	4.8	0.6	1.8	2.73	Healthy	Healthy
455	170.909	1_Johor	SMK BUKIT NANING	54	Female	Malay	Degree	Married	Yes	2	4	Adequate	5	6	1737	420	No	No	99.2	No	4	8	6	5.1	167	69	6.1	1.8	1.3	3.98	Healthy	Healthy
456	508.308	1_Johor	SMK BANDAR SERI ALAM	52	Female	Malay	Degree	Married	Yes	1	2	Inadequate	4	6	3465	90	No	No	76	Abdominal obese	6	4	10	6	152	88	5.7	1.1	1.5	3.7	Healthy	Impaired fasting glucose
457	508.308	1_Johor	SMK BANDAR SERI ALAM	52	Male	Malay	Degree	Married	No	1	2	Inadequate	5	5	231	120	No	No	80	Abdominal obese	0	4	6	5.1	150	83	5.8		1.21	3.14	Healthy	Healthy
458	508.308	1_Johor	SMK BANDAR SERI ALAM	28	Female	Malay	Degree	Married	No	1			7	7	612	120	No	No	62	Abdominal obese	8	8	8	5.4	98	71	4.1	0.7	1.99	1.79	Healthy	Healthy
459	508.308	1_Johor	SMK BANDAR SERI ALAM	27	Female	Malay	Degree	Married	No	0	1	Inadequate	6	7	0			No	80	No	4	12	8	4.7	116	69	7.5	1	1.54	5.51	Healthy	Healthy
460	508.308	1_Johor	SMK BANDAR SERI ALAM	45	Female	Malay									0				105	No				9.5	156	90	4.6	1.2	1	3.06	Undiagnosed T2DM
461	508.308	1_Johor	SMK BANDAR SERI ALAM	24	Female	Malay	Degree	Single	No	0	0	Inadequate			0		No	No	70	Abdominal obese	6	4	8	4.6	107	72	4.8	0.5	1.48	3.09	Healthy	Healthy
462	508.308	1_Johor	SMK BANDAR SERI ALAM	43	Female	Malay	Degree	Divorced	Yes	0	0	Inadequate	6	7	1280	70	No	No	80	No	10	10	12	5.5	141	97	6.9	2.8	1.42	4.21	Healthy	Healthy
463	508.308	1_Johor	SMK BANDAR SERI ALAM	46	Female	Malay	Degree	Married	No	1	1	Inadequate	4	7	4158	120	No	No	79	Abdominal obese	0	2	0	6.2	91	66	5.4	0.7	2.28	2.8	Undiagnosed T2DM
464	508.308	1_Johor	SMK BANDAR SERI ALAM	26	Female	Malay	Degree	Married	No				5		99	30	No	No	86	No	0	10	12	5.2	131	82	4.5	0.8	0.98	3.16	Healthy	Healthy
465	508.308	1_Johor	SMK BANDAR SERI ALAM	35	Female	Malay	Degree	Married	Yes	1	1	Inadequate	6	4	0	240	No	No	84	No	0	0	0	7	121	67	5.3	1.2	1.17	3.59	Undiagnosed T2DM
466	508.308	1_Johor	SMK BANDAR SERI ALAM	44	Female	Malay	Diploma	Married	No	0	1	Inadequate	6	7	0	480	No	No	97	No	6	2	2	4.6	122	83	5.7	1.1	1.45	3.75	Healthy	Healthy
467	508.308	1_Johor	SMK BANDAR SERI ALAM	23	Female	Malay	Degree	Single	No						0				65	Abdominal obese				4.6	104	65	4.1	0.6	1.42	2.41	Healthy	Healthy
468	508.308	1_Johor	SMK BANDAR SERI ALAM	39	Female	Malay	Degree	Married	No	0	2	Inadequate	5	6	0		No	No	92	No	4	8	8	4.7	123	66	4.8	0.7	1.35	3.13	Healthy	Healthy
469	508.308	1_Johor	SMK BANDAR SERI ALAM	27	Female	Malay	Degree	Single	Yes	1	1	Inadequate	7	7	2772	180	No	No			14	14	14	4.5	106	68	4	0.6	1.33	2.4	Healthy	Healthy
470	508.308	1_Johor	SMK BANDAR SERI ALAM	28	Female	Malay	Degree	Married	Yes	1	1	Inadequate	5	6	0	120	No	No	78	Abdominal obese	16	16		4.3	116	65	5	0.9	2.23	2.36	Healthy	Healthy
471	508.308	1_Johor	SMK BANDAR SERI ALAM	34	Female	Malay	Degree	Married	Yes	1	0	Inadequate	5	6	1980	120	No	No	77	Abdominal obese	4	2	8	5.2	98		4.3	0.5	1.25	2.82	Healthy	Healthy
472	508.308	1_Johor	SMK BANDAR SERI ALAM	32	Female	Malay	Degree	Married	No	0	1	Inadequate	6	7	0	240	No	No	73	Abdominal obese	4	4	2	4.9	102	59	5.7	0.9	1.31	3.98	Healthy	Healthy
473	205.5	1_Johor	SMK BANDAR TENGGARA	44	Female	Malay	Degree	Married	Yes	0	1	Inadequate	7	6	0		No	No	78	Abdominal obese	6	18	18	5	107	66	4.2	0.8	1.4	2.44	Healthy	Healthy
474	205.5	1_Johor	SMK BANDAR TENGGARA	43	Female	Malay	Secondary	Married	No	1	1	Inadequate	6	6	3360		No	No	75	Abdominal obese	4	10	10	4.6	113	77	6.3	1	1.7	4.15	Healthy	Healthy
475	205.5	1_Johor	SMK BANDAR TENGGARA	56	Female	Malay	Diploma	Married	Yes	1	1	Inadequate	6	6	852	120	No	No	109	No	2	4	4	4.4	127	65	6.7	0.6	2.3	4.13	Healthy	Healthy
476	205.5	1_Johor	SMK BANDAR TENGGARA	33	Female	Malay	Master and above	Single	No	2	1	Inadequate	8	9	0	240	No	No	86	No	2	20	16	4.1	121	73	5.3	1.6	1	3.57	Healthy	Healthy
477	205.5	1_Johor	SMK BANDAR TENGGARA	28	Female	Malay	Degree	Single	No	1	0	Inadequate	5	5	406.5	330	No	No	67	Abdominal obese	2	10	6	4.4	101	65	4.4	0.5	1.7	2.47	Healthy	Healthy
478	205.5	1_Johor	SMK BANDAR TENGGARA	51	Female	Malay	Degree	Married	Yes	1	2	Inadequate	5	5	0		No	No	88	No	4	12	12	14.1	149	83	6.6		1.1	3.82	T2DM
479	205.5	1_Johor	SMK BANDAR TENGGARA	26	Female	Malay	Degree	Single	Yes	0	0	Inadequate	6	8	0		No	No			6	6	6	4.2	116	72	4.5	0.6	2	2.23	Healthy	Healthy
480	205.5	1_Johor	SMK BANDAR TENGGARA	35	Female	Malay	Secondary	Married	Yes	1	1	Inadequate	4	4	546	60	No	No	89	No	10			4.2	127	75	4.6	1.5	1.5	2.42	Healthy	Healthy
481	205.5	1_Johor	SMK BANDAR TENGGARA	48	Female	Malay	Degree	Married	No	0	1	Inadequate	8	6	273	180	No	No	86	No	4	10	20	5.2			5.6	1.3	1.2	3.81	Healthy	Healthy
482	205.5	1_Johor	SMK BANDAR TENGGARA	28	Female	Malay									0				65	Abdominal obese				4.7	114	80	3.9	0.7	1.6	1.98	Healthy	Healthy
483	205.5	1_Johor	SMK BANDAR TENGGARA	29	Female	Malay	Degree	Married	No	1	1	Inadequate	6	8	0		No	No	83	No	0	8	12	6.1	106	78	4.6	0.9	1.3	2.89	Undiagnosed T2DM
484	205.5	1_Johor	SMK BANDAR TENGGARA	39	Female	Malay	Degree	Married	Yes	0	1	Inadequate	6	5	2415	240	No	No	81	No	4	10	8	4.7	128	77	7.4	1.2	1.6	5.26	Healthy	Healthy
485	205.5	1_Johor	SMK BANDAR TENGGARA	38	Female	Malay	Degree	Single	No	3	1	Inadequate			598	30		No	76	Abdominal obese	6	12	10	4.9	123	73	4.6	0.5	1.6	2.77	Healthy	Healthy
486	205.5	1_Johor	SMK BANDAR TENGGARA	54	Male	Malay									0				87	Abdominal obese				4.8	110	80	6.8	0.9	1.7	4.69	Healthy	Healthy
487	205.5	1_Johor	SMK BANDAR TENGGARA	28	Female	Malay									0				76	Abdominal obese				4.3	132	88	3.9	1	1.2	2.25	Healthy	Healthy
488	205.5	1_Johor	SMK BANDAR TENGGARA	32	Female	Malay	Degree	Married	No	1	1	Inadequate			1224		No	No	73	Abdominal obese	14	14	14	5.4	123	75	5.8	0.7	1.8	3.68	Healthy	Healthy
489	205.5	1_Johor	SMK BANDAR TENGGARA	55	Female	Malay	Degree	Married	No				5	5	2866.5	30	No	No	75	Abdominal obese	2	6	4	4.8	131	79	5.5	1.7	1.5	3.23	Healthy	Healthy
490	62.149	1_Johor	SMK BUKIT PASIR	49	Male	Malay	Master and above	Married	Yes	0			8	8	4158	480	No	No	107.5	No	0	2	0			90	5.9	1.7	1.5	3.63	T2DM
491	62.149	1_Johor	SMK BUKIT PASIR	47	Male	Indian	Master and above	Married	Yes	1	1	Inadequate	6	8	7852.5	330	No	No	110.8	No	0	6	0	4.6	132	75	4.5	0.8	1.2	2.94	Healthy	Healthy
492	62.149	1_Johor	SMK BUKIT PASIR	46	Female	Malay	Degree	Married	No	0	2	Inadequate	9	9	240		No	No	102	No	2	18	18	4.7	145	77	5.6	2.5	1.1	3.36	Healthy	Healthy
493	62.149	1_Johor	SMK BUKIT PASIR	46	Female	Chinese	Degree	Married	No	1	1	Inadequate	7	9	1980		No	No	89	No	8	2	10	4.8	125	69	6.7	1.2	1.5	4.66	Healthy	Healthy
494	62.149	1_Johor	SMK BUKIT PASIR	45	Male	Malay	Degree	Married	Yes	1	1	Inadequate	8		7116	180	Yes	No	102	No	8	10	14	4.9	139	92	4.3	2.1	1	2.35	Healthy	Healthy
495	62.149	1_Johor	SMK BUKIT PASIR	40	Female	Malay	Degree	Married	No	1	1	Inadequate	6	5	873	120	No	No	98.2	No	14	18	16	4.5	155	96	6.2	2.3	1.5	3.66	Healthy	Healthy
496	62.149	1_Johor	SMK BUKIT PASIR	25	Female	Malay	Degree	Single	Yes	0	2	Inadequate	6		960		No	No	65.5	Abdominal obese	0	0	4	4.7	113	78	5.6	0.5		2.77	Healthy	Healthy
497	62.149	1_Johor	SMK BUKIT PASIR	29	Female	Malay	Degree	Married	Yes	1	2	Inadequate	6	6	600		No	No	85	No	2	12	6	4.5	121	61	6.6	0.6	1.9	4.43	Healthy	Healthy
498	62.149	1_Johor	SMK BUKIT PASIR	39	Female	Malay	Degree	Married	Yes	0	2	Inadequate	5	6	645		No	No	105	No	4	8	8		137	86	4.4	1.9	1.4	2.14	T2DM
499	62.149	1_Johor	SMK BUKIT PASIR	33	Female	Malay	Degree	Married	No	1	1	Inadequate	6	7	4308	120	No	No	85.5	No	0	10	8		128	79	5.7	1.9	1	3.84	Healthy	Healthy
500	62.149	1_Johor	SMK BUKIT PASIR	29	Female	Malay	Degree	Married	Yes				7	6	1980	120	No	No	80.5	No	4	2	8		105	60	5.8	0.6	2.3	3.23	Healthy	Healthy
501	62.149	1_Johor	SMK BUKIT PASIR	29	Female	Malay	Degree	Married	No	1	1	Inadequate	6	6	1786.5	300	No	No	110	No	16	18	16	4.8	117	82	4	0.9	1.5	2.09	Healthy	Healthy
502	62.149	1_Johor	SMK BUKIT PASIR	40	Male	Malay	Degree	Married	Yes	1	2	Inadequate	5	6	80		Yes	No			2	6	10	10.6		100	5.5	0.9	1.5	3.59	T2DM
503	62.149	1_Johor	SMK BUKIT PASIR	51	Female	Malay	Degree	Widowed	Yes	1	1	Inadequate	6	6	2160	60	No	No	78.1	Abdominal obese	0	8	4	4.9	130	84	5.1	0.7	1.9	2.88	Healthy	Healthy
504	62.149	1_Johor	SMK BUKIT PASIR	32	Female	Malay	Degree	Married	No	1	4	Inadequate	7	5	6570	600	No	No	71.8	Abdominal obese	22	12	18	4.8	117	76	5	0.6	1.6	3.13	Healthy	Healthy
505	62.149	1_Johor	SMK BUKIT PASIR	36	Female	Malay	Degree	Married	No	1	2	Inadequate	5	6	0		No	No	65.1	Abdominal obese	2	6	8	4.2	95	62	4.6	0.8	1.6	2.64	Healthy	Healthy
506	62.149	1_Johor	SMK BUKIT PASIR	30	Female	Malay	Degree	Single	Yes	2	2	Inadequate	7	7	4293	60	No	No	84.1	No	0	2	4	5.3	114	77	5.3	0.6	1.7	3.33	Healthy	Healthy
507	62.149	1_Johor	SMK BUKIT PASIR	54	Male	Malay	Diploma	Single	Yes	0	1	Inadequate	6	6	0		No	No	103.6	No	8	14	16	6.8	133	76	7.7		1.5	4.61	Undiagnosed T2DM
508	62.149	1_Johor	SMK BUKIT PASIR	38	Female	Malay	Degree	Married	No	0	1	Inadequate	6	5	289.5			No	81.7	No	4	2	2	5.2	120	72	4	0.6	1.4	2.33	Healthy	Healthy
509	62.149	1_Johor	SMK BUKIT PASIR	27	Female	Chinese		Married							0				77	Abdominal obese				4.7	117	74	3.9	1.1	1.1	2.3	Healthy	Healthy
510	62.149	1_Johor	SMK BUKIT PASIR	49	Male	Malay		Married							0				96.5	No				5.5	172	102	4.3	2.1	1	2.35	Healthy	Healthy
511	62.149	1_Johor	SMK BUKIT PASIR	46	Female	Malay	Degree	Married	Yes	1			6	7	1548	240	No	No	90.8	No	4	0	6	5.8	143	79	4.5	0.7	1.4	2.78	Healthy	Impaired fasting glucose
512	62.149	1_Johor	SMK BUKIT PASIR	53	Female	Malay	Degree	Married	Yes	1	1	Inadequate	6	6	10758	240	No	No	83	No	2	2	4	6.4	136	68	5.3	0.7	1.4	3.58	Undiagnosed T2DM
513	62.149	1_Johor	SMK BUKIT PASIR	30	Female	Chinese	Degree	Married	No	2	5	Adequate	9	9	4758	300	No	No	73.6	Abdominal obese	0	2	2	4.7	111	66	4.7	0.6	1.5	2.93	Healthy	Healthy
514	62.149	1_Johor	SMK BUKIT PASIR	33	Female	Chinese	Degree	Single	No	1	1	Inadequate	5	7	1386	240	No	No	74.5	Abdominal obese	20	20	28	5.2	150	83	4.7	1	1.5	2.75	Healthy	Healthy
515	62.149	1_Johor	SMK BUKIT PASIR	31	Female	Chinese	Degree	Married	Yes	0	1	Inadequate	6	8	3132	420	No	No	73	Abdominal obese	4	8	6	4.8	105	69	4.1	0.5	1.6	2.27	Healthy	Healthy
516	62.149	1_Johor	SMK BUKIT PASIR	55	Female	Malay	Diploma	Married	Yes	1	1	Inadequate	5	5	459		No	No	92	No	4	8	8	4.9	145	97	6	1.3	1.6	3.81	Healthy	Healthy
517	62.149	1_Johor	SMK BUKIT PASIR	48	Male	Malay	Master and above	Married	Yes	3			7		8718		No	No	94.6	No	0	10	8	5.5	134	82	6.1		1.68		Healthy	Healthy
518	62.149	1_Johor	SMK BUKIT PASIR	53	Female	Malay	Degree	Married	No	1	4	Inadequate	6	6	1506	120	No	No	85.6	No	2	2	6	4.7	94	60	5.6	0.8	1.6	3.64	Healthy	Healthy
519	62.149	1_Johor	SMK BUKIT PASIR	50	Female	Malay	Diploma	Married	No	1	2	Inadequate	6	5	165		No	No	91.6	No	10	18	24	5.3	127	72	5.7	0.8	1.5	3.84	Healthy	Healthy
520	62.149	1_Johor	SMK BUKIT PASIR	56	Male	Malay	Diploma	Married	No				6	7	8052		No	No	84.9	Abdominal obese	0	10	8	4.6	172	76	5.2	0.9	1.3	3.49	Healthy	Healthy
521	62.149	1_Johor	SMK BUKIT PASIR	27	Female	Chinese	Degree	Single	Yes	1	2	Inadequate	8	9	1434		No	No	73	Abdominal obese	4	4	6	4.9	117	73	3.9	0.5	1.8	1.87	Healthy	Healthy
522	62.149	1_Johor	SMK BUKIT PASIR	41	Female	Malay	Diploma	Married	Yes	1	1	Inadequate	5	6	0		No	No	108.1	No	0	4	10	4.7	132	75	5.2	1.6	1.3	3.17	Healthy	Healthy
523	62.149	1_Johor	SMK BUKIT PASIR	40	Female	Malay	Degree	Married	No	0	1	Inadequate	5	4	0	60	No	No	103	No	12	18	24	5.5	144	76	5.3	0.9	1.2	3.69	Healthy	Healthy
524	62.149	1_Johor	SMK BUKIT PASIR	50	Male	Malay	Master and above	Married	Yes	3	2	Inadequate	6	6	6852	240	No	No	113.5	No	0	6	4	8.2	116	77	3.9	2.8	0.8	1.83	T2DM
525	62.149	1_Johor	SMK BUKIT PASIR	47	Female	Chinese	Degree	Married	No	1	0	Inadequate	6	7	4345.5	90	No	No	91.1	No	12	14	14	4.4	129	86	5.9	1	1.4	4.05	Healthy	Healthy
526	62.149	1_Johor	SMK BUKIT PASIR	44	Female	Malay	Degree	Widowed	No	1	1	Inadequate	5	5	306		No	No	73.5	Abdominal obese	2	6	10	5.4	105	63	5.7	0.9	1.6	3.69	Healthy	Healthy
527	62.149	1_Johor	SMK BUKIT PASIR	38	Female	Malay	Degree	Married	No	1	1	Inadequate	5	6	6318	180	No	No	76	Abdominal obese	8	8	4	4.4	106		4.8	0.9	1.2	3.19	Healthy	Healthy
528	62.149	1_Johor	SMK BUKIT PASIR	40	Female	Malay	Degree	Married	No	1	1	Inadequate	5	5	0		No	No	83.5	No	30	26	38	4.9	107	67	5.6	0.7	2	3.28	Healthy	Healthy
529	62.149	1_Johor	SMK BUKIT PASIR	49	Male	Malay	Degree	Married	Yes	1	0	Inadequate	5	5	8514	300	No	No	111	No	4	4	12	4.5	135	99	6.3	1.3	1.6	4.11	Healthy	Healthy
530	62.149	1_Johor	SMK BUKIT PASIR	43	Female	Chinese	Degree	Single	No	1	1	Inadequate	7	8	0		No	No			4	2	8	4.5	124	80	5.1	1.1	1.7	2.9	Healthy	Healthy
531	62.149	1_Johor	SMK BUKIT PASIR	48	Male	Malay	Degree	Married	Yes	0	0	Inadequate	6	5	1920	360	No	No	84.5	Abdominal obese	8	14	14	5.2	98	60	7.2				Healthy	Healthy
532	62.149	1_Johor	SMK BUKIT PASIR	32	Female	Malay	Degree	Married	Yes	2	2	Inadequate	9	7	1031	480	No	No	85	No	2	6	2	4.3	128	76	4.2	0.6	1.3	2.63	Healthy	Healthy
533	62.149	1_Johor	SMK BUKIT PASIR	53	Male	Malay	Degree	Married	No	2	7	Adequate	6	6	7290	180	No	No	89	Abdominal obese	0	0	0	5.5	164	90	5.2	1.5	1.1	3.42	Healthy	Healthy
534	55.447	1_Johor	SMK CHAAH	27	Female	Malay	Master and above	Single	Yes	0	0	Inadequate	6	7	2746.5	10	No	No	74	Abdominal obese	0	0	2	4.8	118	75	4.9	0.8	1.2	3.34	Healthy	Healthy
535	55.447	1_Johor	SMK CHAAH	27	Female	Indian									0				63	Abdominal obese				4.3	101	62	4.9	0.5	1.8	2.87	Healthy	Healthy
536	55.447	1_Johor	SMK CHAAH	51	Female	Malay									0				75	Abdominal obese				14.1	128	80	5.3	1	1.4	3.45	Undiagnosed T2DM
537	55.447	1_Johor	SMK CHAAH	48	Female	Malay									0				92	No				6.9	148	93	6.5	2.4	1.5	3.91	Undiagnosed T2DM
538	55.447	1_Johor	SMK CHAAH	39	Female	Malay	Degree	Single	Yes	0	1	Inadequate	7	6	0		No	No	87.1	No	10	10	12	4.7	131	79	5.3	0.6	1.7	3.33	Healthy	Healthy
539	55.447	1_Johor	SMK CHAAH	41	Female	Malay	Master and above	Married	Yes	1	1	Inadequate	7	7	960		No	No	70	Abdominal obese	10	12	10	4.6	141	81	5.2	0.8	1.6	3.24	Healthy	Healthy
540	55.447	1_Johor	SMK CHAAH	40	Female	Malay	Degree	Married	Yes	1	2	Inadequate	6	7	586.5	180	No	No	74	Abdominal obese	16	10	16	4.9	126	92	5	0.5	1	3.77	Healthy	Healthy
541	55.447	1_Johor	SMK CHAAH	47	Male	Malay	Secondary	Married	Yes	2	0	Inadequate	5	5	1386	300	No	No	90	No	2	4	8	9.3	115	73	4.9	1.5	1.3	2.92	T2DM
542	55.447	1_Johor	SMK CHAAH	42	Female	Malay	Degree	Married	Yes				6	6	0		No	No	82.5	No	12	14	20	5.1	150	93	5.1	1.2	1.4	3.16	Healthy	Healthy
543	55.447	1_Johor	SMK CHAAH	46	Female	Malay	Degree	Married	Yes	1	1	Inadequate	5	5	0		No	No	91	No	0	2	2	4.9	137	86	7.1	1.8	2	4.28	Healthy	Healthy
544	55.447	1_Johor	SMK CHAAH	50	Female	Malay	Degree	Married	No	3	3	Adequate	5	6	0	120	No	No	82	No	0	4	4	4.8	159	100	6.9	1.5	1.2	5.02	Healthy	Healthy
545	55.447	1_Johor	SMK CHAAH	37	Male	Malay	Degree	Married	No	1	0	Inadequate	6	6	3828		No	No			0	10	2	5.8	154	103	4.4	1	1.1	2.85	Healthy	Impaired fasting glucose
546	55.447	1_Johor	SMK CHAAH	35	Male	Malay	Master and above	Married	No	1	1	Inadequate	6	6	7773	120	No	No	98.5	No	2	6	8	5.6	125	90	4.5	2	0.8	2.79	Healthy	Impaired fasting glucose
547	55.447	1_Johor	SMK CHAAH	39	Female	Malay	Degree	Married	No	0	1	Inadequate	7	8	2400		No	No	76.5	Abdominal obese	14	10	14	4.5	124	62	4.4	0.8	1.6	2.44	Healthy	Healthy
548	55.447	1_Johor	SMK CHAAH	50	Female	Malay	Master and above	Married	No	2	1	Inadequate	5	6	1506	240	No	No	75	Abdominal obese	8	10	12	4.4	111	70	6.2	0.6		3.53	Healthy	Healthy
549	55.447	1_Johor	SMK CHAAH	42	Female	Malay	Degree	Married	No	0	4	Inadequate	6	7	960		No	No	81.1	No	2	8	2	4.6	122	80	6.9	1.2	1.9	4.46	Healthy	Healthy
550	55.447	1_Johor	SMK CHAAH	30	Female	Malay	Degree	Married	No	0	1	Inadequate	5	6	99	30	No	No	62	Abdominal obese	4	8	10		110	64	5.2	0.5		2.37	Healthy	Healthy
551	55.447	1_Johor	SMK CHAAH	31	Female	Malay									0				75	Abdominal obese				4.4	133	85	4.1	0.6	1.5	2.33	Healthy	Healthy
552	55.447	1_Johor	SMK CHAAH	37	Female	Malay	Master and above	Married	Yes	0	1	Inadequate	6	8	0	300	No	No	70	Abdominal obese	0	6	2	4.2	117	73	4.8	0.7	1.8	2.68	Healthy	Healthy
553	55.447	1_Johor	SMK CHAAH	32	Female	Malay	Degree	Married	No	1	1	Inadequate	7	7	1386	60	No	No	67.8	Abdominal obese	2	10	8	4.2	119	69	4.6	0.6	1.6	2.73	Healthy	Healthy
554	55.447	1_Johor	SMK CHAAH	49	Male	Malay	Degree	Married	Yes	1	2	Inadequate	6	6	360	120	No	No	102	No	4	6	6	10.4	147	105	5.7		1.1	3.1	Undiagnosed T2DM
555	55.447	1_Johor	SMK CHAAH	51	Female	Malay									0				91.5	No				5.3	122	89	5	2.3	1.4	2.56	Healthy	Healthy
556	55.447	1_Johor	SMK CHAAH	43	Male	Indian									0				89	Abdominal obese				12.1	143	92	6.2		1.3	3.04	Undiagnosed T2DM
557	55.447	1_Johor	SMK CHAAH	39	Female	Indian	Master and above	Married	No	0	1	Inadequate	8	8	0	180	No	No	85	No	2	6	10	4.5	123	89	5.4	0.8	1.2	3.84	Healthy	Healthy
558	55.447	1_Johor	SMK CHAAH	33	Female	Malay	Degree	Married	Yes	0	2	Inadequate	7	8	720	120	No	No	67.5	Abdominal obese	6	10	12	4.2	123	69	3.9	0.7	1.2	2.38	Healthy	Healthy
559	55.447	1_Johor	SMK CHAAH	43	Female	Chinese	Degree	Single	No	4	3	Adequate	5	7	546	120	No	No	87	No	4	8	6	4.9	110	74	5.3	0.9	1.4	3.49	Healthy	Healthy
560	55.447	1_Johor	SMK CHAAH	43	Male	Chinese	Degree	Single	No	0	2	Inadequate	7	8	960	120	No	No	62	Abdominal obese	0	4	0	4.4	104	63	4.4	0.5	1.5	2.67	Healthy	Healthy
561	55.447	1_Johor	SMK CHAAH	51	Female	Malay	Degree	Married	Yes	2	1	Inadequate	7	8	4293	120	No	No	80	No	0	4	2	4.7	167	82	6.1	2.1	1.5	3.65	Healthy	Healthy
562	55.447	1_Johor	SMK CHAAH	33	Male	Malay	Secondary	Married	No	0	2	Inadequate	6	7	4824	240	Yes	No	79	Abdominal obese	8	6	14	4.6	110	62	5.3	0.9	1.3	3.59	Healthy	Healthy
563	55.447	1_Johor	SMK CHAAH	37	Male	Chinese	Degree	Married	Yes	1	2	Inadequate	8	8	4212	120	No	No	62	Abdominal obese	10	0	8	4.4	108	68	5.3	0.7	2.3	2.68	Healthy	Healthy
564	55.447	1_Johor	SMK CHAAH	44	Female	Chinese	Degree	Married	Yes				6	7	2400	35	No	No	74	Abdominal obese	14	16	16	4.4	130	85	5.5	1.2	1.9	3.06	Healthy	Healthy
565	55.447	1_Johor	SMK CHAAH	39	Female	Chinese	Degree	Married	No	1	1	Inadequate	5	6	0		No	No	76	Abdominal obese	12	14	24	4.6	110	75	5.6	0.7	1.6	3.68	Healthy	Healthy
566	55.447	1_Johor	SMK CHAAH	38	Male	Malay									0				110.5	No				5.3	143	90	6	1.8	1.1	4.08	Healthy	Healthy
567	55.447	1_Johor	SMK CHAAH	36	Male	Malay									0				91	No				4.3	119	74	4.8	1.6	1	3.07	Healthy	Healthy
568	55.447	1_Johor	SMK CHAAH	47	Male	Indian	Degree	Married	Yes	1	1	Inadequate	6	6	918		No	No	88	Abdominal obese	0	0	0	4.6	127	81	5	1.4	1.2	3.16	Healthy	Healthy
569	55.447	1_Johor	SMK CHAAH	50	Male	Indian	Degree	Married	Yes	1	2	Inadequate	6	6	1470	180	No	No	93.5	No	6	2	4	6.3	149	91	4.4	2	1	2.49	T2DM
570	55.447	1_Johor	SMK CHAAH	46	Male	Malay	Degree	Married	Yes	2	4	Adequate	7	8	6834	300	Yes	No	91	No	0	0	0	4.6	136	99		1.6	0.9		Healthy	Healthy
571	55.447	1_Johor	SMK CHAAH	28	Female	Malay	Secondary	Married	No	0	0	Inadequate	8	9	0		No	No	77	Abdominal obese	14	14	14	4.6	113	69	4.4	2.6	0.9	2.32	Healthy	Healthy
572	55.447	1_Johor	SMK CHAAH	24	Female	Malay	Degree	Single	Yes	1	1	Inadequate	6	5	240		Yes	No			4	0	4	4.5	118	69	5.7	0.8	1.9	3.44	Healthy	Healthy
573	55.447	1_Johor	SMK CHAAH	29	Male	Malay	Degree	Married	Yes	1	1	Inadequate	5	8	7866	180	Yes	No			6	8	10	4.7	133	88	5.4	1.2	1.2	3.66	Healthy	Healthy
574	55.447	1_Johor	SMK CHAAH	35	Male	Malay	Degree	Married	No	1	2	Inadequate	4	6	0		No	No	78	Abdominal obese	12	4	12	4.7	123	79	4.9	1.2	1.1	3.26	Healthy	Healthy
575	261.496	1_Johor	SMK CONVENT (M)	28	Female	Malay	Degree	Single	No	0	2	Inadequate	4	6	678	360	No	No	66	Abdominal obese	0	2	4	4.4	107	75	4.9	0.6	1.7	2.93	Healthy	Healthy
576	261.496	1_Johor	SMK CONVENT (M)	46	Female	Malay	Master and above	Married	Yes	0	2	Inadequate	7	7	480	120	No	No	81.3	No	4	8	12	5.9	174	93	5.3	2.9	1.2	2.78	Healthy	Impaired fasting glucose
577	261.496	1_Johor	SMK CONVENT (M)	53	Female	Malay	Degree	Single	Yes	0	1	Inadequate	6	6	2400	195	No	No			14	14	14	4.6	126		6.1	1.2	2.1	3.46	Healthy	Healthy
578	261.496	1_Johor	SMK CONVENT (M)	42	Female	Chinese	Degree	Single	No	2	1	Inadequate	5	7	0		No	No	66.9	Abdominal obese	20	16	24	4.6	100	59	5.3	1.1	1.5	3.3	Healthy	Healthy
579	261.496	1_Johor	SMK CONVENT (M)	46	Female	Malay	Degree	Married	Yes	1	7	Inadequate	6	6	1188	180	No	No	81	No	8	12	10	7.9	132	71		2.1	1		T2DM
580	261.496	1_Johor	SMK CONVENT (M)	55	Female	Malay	Degree	Married	Yes	0	2	Inadequate	5	6	0		No	No	78	Abdominal obese	0	0	0	6	125	73	4.7	0.8	1.7	2.74	T2DM
581	261.496	1_Johor	SMK CONVENT (M)	53	Male	Malay	Master and above	Widowed	No	1	1	Inadequate	5	6	3550	540	No	No	80	Abdominal obese	2	4	2	5.2	154	96	4.8	0.6	1.3	3.23	Healthy	Healthy
582	261.496	1_Johor	SMK CONVENT (M)	44	Female	Malay	Degree	Married	No	1	1	Inadequate	6	6	480	30	No	No	68	Abdominal obese	10	12	14	4.6	138	73	6	0.5		3.27	Healthy	Healthy
583	261.496	1_Johor	SMK CONVENT (M)	52	Female	Chinese	Degree	Married	No	1	0	Inadequate	6	7	1464	300	No	No	71.5	Abdominal obese	10	18	22	4.5	109	70	5.3	1.3	1.5	3.21	Healthy	Healthy
584	261.496	1_Johor	SMK CONVENT (M)	57	Female	Malay	Master and above	Married	Yes	1	1	Inadequate	8	9	2514	120	No	No	108.5	No	14	14	14	5.9	157	96	4.8	1.3	1.7	2.51	T2DM
585	261.496	1_Johor	SMK CONVENT (M)	42	Female	Malay	Degree	Married	Yes	1	1	Inadequate	6	7	960	120	No	No	71.5	Abdominal obese	4	4	6	4.9	124	77	5.2	1.1	2	2.7	Healthy	Healthy
586	261.496	1_Johor	SMK CONVENT (M)	43	Female	Malay	Degree	Married	No	0	0	Inadequate	6	7	2019	180	No	No	67	Abdominal obese	6	24	16	4.6	117	78	5.8	2	1.9	2.99	Healthy	Healthy
587	261.496	1_Johor	SMK CONVENT (M)	26	Female	Malay									0				70.5	Abdominal obese				4.8	112	70		0.4	1.8		Healthy	Healthy
588	261.496	1_Johor	SMK CONVENT (M)	42	Female	Malay									0				79	Abdominal obese				4.4	109	64	5.8	0.9	1.4	3.99	Healthy	Healthy
589	261.496	1_Johor	SMK CONVENT (M)	44	Female	Malay	Degree	Married	Yes	0	1	Inadequate	7	6	1980	240	No	No	104	No	12	22	26	4.2	137	91	5.3	1.6	1.6	2.97	Healthy	Healthy
590	261.496	1_Johor	SMK CONVENT (M)	53	Female	Malay									0				100	No				5.3	120	84	4.7	1.4	1.6	2.46	Healthy	Healthy
592	72.899	1_Johor	SMK DATO` ALI HJ AHMAD	58	Female	Malay	Degree	Married	No				5	5	0		No	No	70	Abdominal obese	4	4	6	5	124	66	5.4	0.5	2.3	2.87	Healthy	Healthy
593	72.899	1_Johor	SMK DATO` ALI HJ AHMAD	48	Female	Malay	Degree	Married	No				6	6	4518	240	No	No	85	No	0	0	0	5.7	119	70	4.8	0.7	1.7	2.78	Healthy	Impaired fasting glucose
594	72.899	1_Johor	SMK DATO` ALI HJ AHMAD	39	Female	Malay	Degree	Married	Yes	1	2	Inadequate	5	6	367.5	60	No	No	81	No	4	6	6	6.1	103	63	6.2	1	1.4	4.35	Undiagnosed T2DM
595	72.899	1_Johor	SMK DATO` ALI HJ AHMAD	45	Female	Malay	Degree	Married	No	3	1	Inadequate	4	4	3012	480	No	No	82	No	0	4	6	5	149	86	6.2	0.8	1.6	4.24	Healthy	Healthy
596	72.899	1_Johor	SMK DATO` ALI HJ AHMAD	44	Female	Malay	Master and above	Divorced	Yes	1	7	Inadequate	6	6	1680		No	No	85	No	2	2	10	4.7	126	76	6.5		1.6	3.31	T2DM
597	72.899	1_Johor	SMK DATO` ALI HJ AHMAD	51	Female	Malay	Degree	Married	No	0	1	Inadequate	6	6	2700		No	No	86	No	4	2	12	11.5	129	80	5.1	1.8	1.6	2.68	Undiagnosed T2DM
598	72.899	1_Johor	SMK DATO` ALI HJ AHMAD	50	Female	Malay	Degree	Married	Yes	1	2	Inadequate	5	6	0		No	No	90	No	0	0	2	5.6	121	77	4.3	2.4	1.3	1.91	Healthy	Impaired fasting glucose
599	72.899	1_Johor	SMK DATO` ALI HJ AHMAD	33	Female	Malay	Master and above	Married	Yes	1			6	6	2160	840	No	No	76	Abdominal obese	4	14	18	4.5	119	70	4.8		1.6	2.93	Healthy	Healthy
600	72.899	1_Johor	SMK DATO` ALI HJ AHMAD	49	Female	Malay	Degree	Married	No	2	2	Inadequate	6	6	4410		No	No	81	No	0	0	0	5.1	164	92	5.5	1.3	1.6	3.31	Healthy	Healthy
601	72.899	1_Johor	SMK DATO` ALI HJ AHMAD	48	Female	Malay	Degree	Married	Yes	1	1	Inadequate	5	5	0		No	No	100	No	0	0	2	5	154	94	4.7	1.4	1.1	2.96	Healthy	Healthy
602	72.899	1_Johor	SMK DATO` ALI HJ AHMAD	53	Male	Malay	Degree	Married	Yes	1			4	4	918	60	Yes	No	80	Abdominal obese	4	0	0	10.3	146	70	4	1	1	2.55	T2DM
603	72.899	1_Johor	SMK DATO` ALI HJ AHMAD	43	Male	Malay	Degree	Married	No	0	1	Inadequate	6	6	480		No	No	89	Abdominal obese	2	6	6	4.7	115	79	4.7	1.3	1	3.11	Healthy	Healthy
604	72.899	1_Johor	SMK DATO` ALI HJ AHMAD	32	Female	Chinese	Master and above	Married	No	1	1	Inadequate	6	7	993	120	No	Yes	76	Abdominal obese	8	10	14	4.3	102	63	5.1	0.4	2.1	2.82	Healthy	Healthy
605	72.899	1_Johor	SMK DATO` ALI HJ AHMAD	37	Female	Chinese	Degree	Single	Yes	1	1	Inadequate	6	8	2712	60	No	No	93	No	10	8	12	4.5	127	76	4.8	0.9	1.6	2.79	Healthy	Healthy
606	72.899	1_Johor	SMK DATO` ALI HJ AHMAD	43	Female	Malay	Degree	Married	Yes	2			4	4	231		No	No	85	No	26	28	28	5.8	142	97	6.2	0.8	2	3.84	Healthy	Impaired fasting glucose
607	72.899	1_Johor	SMK DATO` ALI HJ AHMAD	37	Female	Malay	Degree	Married	No	0	2	Inadequate	5	6	0		No	No	65	Abdominal obese	4	14	10	4	112	69	5.8	0.5	1.8	3.77	Healthy	Healthy
608	72.899	1_Johor	SMK DATO` ALI HJ AHMAD	47	Female	Malay	Master and above	Married	Yes	1	2	Inadequate	5	8	690	90	No	No	80	No	6	4	12	4.8	101	70	6.8	1.6	1.5	4.57	Healthy	Healthy
609	72.899	1_Johor	SMK DATO` ALI HJ AHMAD	41	Female	Malay	Degree	Married	Yes	1	2	Inadequate	5	5	4572	540	No	No	73	Abdominal obese	6	16	18	5.9	120	84	5.2	0.8	1.5	3.34	Healthy	Impaired fasting glucose
610	72.899	1_Johor	SMK DATO` ALI HJ AHMAD	26	Female	Malay	Degree	Single	No	1	2	Inadequate	7	8	1794	780	No	No	60	Abdominal obese	0	0	2	4.8	110	67	4.6	0.4	2	2.42	Healthy	Healthy
611	61.441	1_Johor	SMK DATO' BENTARA DALAM	28	Female	Malay	Degree	Single	No	0	3	Inadequate	6	6	0		No	No	68	Abdominal obese	8	10	10	4.6	125	85	5.4	1.5	1.4	3.32	Healthy	Healthy
612	61.441	1_Johor	SMK DATO' BENTARA DALAM	50	Male	Malay	Degree	Married	Yes	0	1	Inadequate	5	5	720		No	No	104.5	No	0	2	4	5	169	103	5.7	1.5	1.5	3.52	Healthy	Healthy
613	61.441	1_Johor	SMK DATO' BENTARA DALAM	33	Female	Malay	Degree	Single	Yes	1	1	Inadequate	8	8	2506.5	30	No	No			2	4	10	4.6	95		4.5	0.5	1.9	2.37	Healthy	Healthy
614	61.441	1_Johor	SMK DATO' BENTARA DALAM	33	Female	Chinese	Degree	Single	Yes	1	2	Inadequate	5	6	0		No	Yes	79	Abdominal obese	6	16	10	4.6	132	82		0.6	1	1.93	Healthy	Healthy
615	61.441	1_Johor	SMK DATO' BENTARA DALAM	38	Female	Malay	Diploma	Married	Yes	1	1	Inadequate	5	6	720	270	No	No	79	Abdominal obese	2	6	8	6.4	142	76	5.7	1.2	1.6	3.56	Undiagnosed T2DM
616	61.441	1_Johor	SMK DATO' BENTARA DALAM	46	Female	Chinese	Degree	Single	Yes				6	7	1964	210	No	No	75	Abdominal obese	4	8	8	4.7	115	73	4.3	0.6	1.7	2.33	Healthy	Healthy
617	61.441	1_Johor	SMK DATO' BENTARA DALAM	28	Female	Malay	Degree	Married	Yes	0	2	Inadequate	5	6	2880		No	No	77	Abdominal obese	4	12	14	4.2	115	81	5	0.6	1.2	3.53	Healthy	Healthy
618	61.441	1_Johor	SMK DATO' BENTARA DALAM	29	Female	Malay	Degree	Single	Yes	0			7	8	1155	120	No	No			16	14	16	5	146		5.3	1.4	1.2	3.46	Healthy	Healthy
619	61.441	1_Johor	SMK DATO' BENTARA DALAM	29	Female	Malay	Secondary	Married	No	1	1	Inadequate	8		0		No	No	79	Abdominal obese	24	18	18	4.3	117	70	5.1	1.2	1.8	2.76	Healthy	Healthy
620	61.441	1_Johor	SMK DATO' BENTARA DALAM	25	Female	Malay	Degree	Married	No	1	0	Inadequate	4	5	6078		No	No	66	Abdominal obese	6	10	10	4.2	115	68	5.7	0.8	2.2	3.14	Healthy	Healthy
621	61.441	1_Johor	SMK DATO' BENTARA DALAM	44	Female	Chinese	Degree	Married	No	2	3	Adequate	6	8	0		No	No	79	Abdominal obese	2	4	6	5	168	101	4.2	1.2	1.1	2.56	Healthy	Healthy
622	61.441	1_Johor	SMK DATO' BENTARA DALAM	50	Female	Malay	Degree	Married	No	2	2	Inadequate	5	6	8388	300	No	No	77	Abdominal obese	0	2	0	5	127	66	6.7	1.1	1.6	4.6	Healthy	Healthy
623	61.441	1_Johor	SMK DATO' BENTARA DALAM	51	Female	Malay	Degree	Married	No	2	2	Inadequate	6	5	396		No	No	71.5	Abdominal obese	0	0	2	4.5	166	90	4.6	0.5	1.5	2.87	Healthy	Healthy
624	61.441	1_Johor	SMK DATO' BENTARA DALAM	50	Female	Malay	Degree	Married	No	1	1	Inadequate	7	6	513		No	No	78.5	Abdominal obese	0	0	0	4	142	77	4.4	1	1.4	2.55	Healthy	Healthy
625	61.441	1_Johor	SMK DATO' BENTARA DALAM	29	Female	Malay	Degree	Married	No	1	2	Inadequate	6	6	918	360	No	No	72.5	Abdominal obese	6	2	8	4.1	105	62	4.6	0.6	1.8	2.53	Healthy	Healthy
626	61.441	1_Johor	SMK DATO' BENTARA DALAM	54	Male	Malay	Degree	Married	Yes	0	1	Inadequate	5	8	240	10	No	No	109	No	0	0	4	4.9	148	75	6	2.2	1.2	3.8	Healthy	Healthy
627	61.441	1_Johor	SMK DATO' BENTARA DALAM	40	Female	Chinese	Degree	Single	No	4	2	Inadequate	7	7	318	180	No	No	73	Abdominal obese	8	6	10	4.6	107	67	4.5	0.9	1.5	2.59	Healthy	Healthy
628	61.441	1_Johor	SMK DATO' BENTARA DALAM	33	Female	Malay	Degree	Married	No	0	2	Inadequate	4	8	1680		No	No	73	Abdominal obese	2	18	14	4.6	117	65	5	0.6	1.7	3.03	Healthy	Healthy
629	61.441	1_Johor	SMK DATO' BENTARA DALAM	40	Female	Malay	Degree	Married	No	0	1	Inadequate	6	6	1026		No	No	76	Abdominal obese	2	4	8	5.2	106		5.2	1	1.4	3.35	Healthy	Healthy
630	61.441	1_Johor	SMK DATO' BENTARA DALAM	50	Female	Chinese	Master and above	Married	No	1	1	Inadequate	5	6	720		No	Yes	82	No	10	12	14	4.9	120	67	4.7	1	1.4	2.85	Healthy	Healthy
631	61.441	1_Johor	SMK DATO' BENTARA DALAM	27	Female	Malay	Degree	Married	Yes	2	1	Inadequate	6	7	3972	720	No	No	68	Abdominal obese	4	6	8	4	94		5.1	0.4	2	2.92	Healthy	Healthy
632	320.046	1_Johor	SMK TAMAN DESA JAYA	49	Female	Indian	Degree	Married	No	0	2	Inadequate	6	9	2697	120	No	No	90	No	0	4	2	4.9	120	77	5.4	1.1	1.4	3.5	Healthy	Healthy
633	320.046	1_Johor	SMK TAMAN DESA JAYA	39	Female	Malay	Degree	Married		1	7	Inadequate	6	6	5040		No	No	76	Abdominal obese	10	14	10	4.8	98	61	5.6	0.8	1.6	3.64	Healthy	Healthy
634	320.046	1_Johor	SMK TAMAN DESA JAYA	29	Female	Malay	Degree	Single	Yes	1	1	Inadequate	5	6	2142		No	No	68	Abdominal obese	0	6	12	4.5	105	62	4.4	0.4	1.4	2.82	Healthy	Healthy
635	320.046	1_Johor	SMK TAMAN DESA JAYA	28	Female	Malay	Degree	Single	Yes	0	1	Inadequate	4		2812	540	No	No	73	Abdominal obese	2	4	8	4.6	108	72	4.3	0.6	2	2.03	Healthy	Healthy
636	320.046	1_Johor	SMK TAMAN DESA JAYA	33	Female	Chinese	Degree	Married	No	0	1	Inadequate	5	6	9198	60	No	Yes	67	Abdominal obese	28	26	30	4.6	110	76	4.5	0.6	1.6	2.63	Healthy	Healthy
638	320.046	1_Johor	SMK TAMAN DESA JAYA	29	Male	Malay	Degree	Married	No	1	2	Inadequate	6	6	1245	180		No	104	No	4	2	4	4.9	134	85	5.8	1.6	1.2	3.87	Healthy	Healthy
639	320.046	1_Johor	SMK TAMAN DESA JAYA	30	Female	Malay	Degree	Married	No	2			4	6	4638	420	No	No	69	Abdominal obese				4.9	113	70		0.5	2.1	2.77	Healthy	Healthy
640	320.046	1_Johor	SMK TAMAN DESA JAYA	35	Female	Malay	Degree	Married	No	0			6	7	693	30	No	No	89	No	4	6	12	4.4	111	75	4	0.7	1.6	2.08	Healthy	Healthy
641	320.046	1_Johor	SMK TAMAN DESA JAYA	47	Male	Malay	Degree	Married	Yes	1	3	Inadequate	5	8	0		Yes	No	100	No	4	6	4	6.1	156	102	6		1.3	2.66	Undiagnosed T2DM
642	320.046	1_Johor	SMK TAMAN DESA JAYA	26	Female	Malay	Degree	Married	Yes	1			6	6	567.5	180	No	No	79	Abdominal obese	16	24	22	4.3	113	70	5.8	0.7	1.4	4.08	Healthy	Healthy
643	320.046	1_Johor	SMK TAMAN DESA JAYA	25	Female	Malay	Degree	Married	Yes	0	0	Inadequate	5	8	0		No	No	73	Abdominal obese	10	2	12	4.3	128	75	3.7	0.5	1.3	2.17	Healthy	Healthy
644	320.046	1_Johor	SMK TAMAN DESA JAYA	35	Male	Malay									0				79	Abdominal obese				4.3	109	70	4	0.8	1.2	2.44	Healthy	Healthy
645	320.046	1_Johor	SMK TAMAN DESA JAYA	35	Male	Malay	Degree	Married	Yes	0	1	Inadequate	8	8	1440		No	No	107	No	2	0	10	5.2	137	83	4.1	1.1	1.2	2.4	Healthy	Healthy
646	320.046	1_Johor	SMK TAMAN DESA JAYA	27	Female	Malay	Degree	Single	Yes	1	1	Inadequate	8	8	1980	300	No	No	65	Abdominal obese	14	16	18	5.1	130	74	4.9	0.8	1.6	2.94	Healthy	Healthy
647	320.046	1_Johor	SMK TAMAN DESA JAYA	25	Female	Chinese	Degree	Single	Yes	0	1	Inadequate	7		2160		No	No	68	Abdominal obese	14	16	20	4.6	116	77	5.3	0.9	1.5	3.39	Healthy	Healthy
648	320.046	1_Johor	SMK TAMAN DESA JAYA	42	Female	Malay									0				87	No				5.1	111	75	5.2	0.6	1.4	3.53	Healthy	Healthy
649	320.046	1_Johor	SMK TAMAN DESA JAYA	29	Female	Malay	Degree	Married	No				5	6	1862	120	No	No	82	No	14	18	18	4	106	62		0.4	1.2	1.62	Healthy	Healthy
650	320.046	1_Johor	SMK TAMAN DESA JAYA	35	Female	Malay									0				71	Abdominal obese				4.7	142	99	5.1	0.7	1.3	3.48	Healthy	Healthy
651	320.046	1_Johor	SMK TAMAN DESA JAYA	45	Female	Malay	Degree	Married	Yes	1	1	Inadequate	8	8	0		No	No	71	Abdominal obese	22	22	24	4.7	146	86	5.5	1.3	1.4	3.51	Healthy	Healthy
652	320.046	1_Johor	SMK TAMAN DESA JAYA	27	Female	Malay	Secondary	Single	No	3			5	6	0		No	No	97	No	14	14	16	5.3	115	73	4.9	0.6	1.6	3.03	Healthy	Healthy
653	320.046	1_Johor	SMK TAMAN DESA JAYA	34	Female	Malay	Degree	Married	Yes	0	0	Inadequate	7	9	0		No	No	87	No	0	0	10	4.6	106	64	4.7	2.6	1.8	1.72	Healthy	Healthy
654	320.046	1_Johor	SMK TAMAN DESA JAYA	27	Female	Other races	Degree	Married	Yes	1	1	Inadequate	6		1332	60	No	No	91	No	0	0	6	6.2	119	60	6.2	0.9	1.4	4.39	Undiagnosed T2DM
655	320.046	1_Johor	SMK TAMAN DESA JAYA	41	Female	Malay									0				75	Abdominal obese				4.6	117	72	6.7	0.8	1.4	4.94	Healthy	Healthy
656	320.046	1_Johor	SMK TAMAN DESA JAYA	27	Female	Malay	Degree	Single	No				4	8	0			No	80	No	10	12	14	5.6	106	62	3.9	0.7	1.2	2.38	Healthy	Impaired fasting glucose
657	320.046	1_Johor	SMK TAMAN DESA JAYA	41	Female	Chinese	Degree	Married	No	0			7	7	0		No	No	68	Abdominal obese	8	14	14	4.8	102	60	4.2	0.6	1.5	2.43	Healthy	Healthy
658	320.046	1_Johor	SMK TAMAN DESA JAYA	53	Female	Malay	Degree	Married	Yes	1	1	Inadequate	5	7	1674		No	No	96	No	2	6	0	6	131	79	5.4	2.8	1.4	2.73	Healthy	Impaired fasting glucose
659	360.051	1_Johor	SMK PASIR GUDANG 2	38	Female	Chinese	Degree	Married	Yes	1	1	Inadequate	7	8	1095	120	No	No	67	Abdominal obese	12	10	22	4.5	111	67		0.5	1.39	1.88	Healthy	Healthy
660	360.051	1_Johor	SMK PASIR GUDANG 2	27	Female	Malay	Degree	Single	Yes	1	4	Inadequate	6	7	775	150	No	No	88	No	16	16	18	5.1	124	85	4.9	1.6	1.34	2.83	Healthy	Healthy
661	360.051	1_Johor	SMK PASIR GUDANG 2	30	Female	Malay	Degree	Single	No	0	1	Inadequate	5	5	0		No	No	67	Abdominal obese	14	22	20	5	103	69	3.7	0.6	1.39	2.04	Healthy	Healthy
662	360.051	1_Johor	SMK PASIR GUDANG 2	29	Female	Malay	Degree	Married	Yes	1	2	Inadequate	6	7	3412	240	No	No	62	Abdominal obese	8	6	12	4.5	111	70	5.3	0.6	2.05	2.98	Healthy	Healthy
663	360.051	1_Johor	SMK PASIR GUDANG 2	37	Female	Malay	Degree	Married	Yes	1	1	Inadequate	7	6	3351	30	No	No	73	Abdominal obese	0	2	4	5	123	62	6.2	1.4		2.94	Healthy	Healthy
664	360.051	1_Johor	SMK PASIR GUDANG 2	47	Female	Malay	Master and above	Married	No	1	1	Inadequate	7	6	1440		No	No	90	No	2	4	4	5.2	122	73	5.8	1.4	1.58	3.58	Healthy	Healthy
665	360.051	1_Johor	SMK PASIR GUDANG 2	34	Female	Malay	Degree	Married	No	0	1	Inadequate	7	6	840		No	No	81	No	0	4	0	5	113	69	5.8	1.1	1.44	3.86	Healthy	Healthy
666	360.051	1_Johor	SMK PASIR GUDANG 2	33	Male	Malay	Degree	Married	Yes	1	1	Inadequate	8	9	678		No	No	65	Abdominal obese	0	14	8	4.5	116	66	4.5	0.5	1.79	2.48	Healthy	Healthy
667	360.051	1_Johor	SMK PASIR GUDANG 2	33	Female	Malay	Diploma	Married	No	1	1	Inadequate	7	8	998		No	No	86	No	0	4	0	5.1	117	72	4.9	1.5	1.16	3.06	Healthy	Healthy
668	360.051	1_Johor	SMK PASIR GUDANG 2	41	Female	Indian	Master and above	Married	No	2	2	Inadequate	5	5	0	150	No	No	84	No	0	0	0	4.9	138	80	4.4	0.9	1	2.99	Healthy	Healthy
669	360.051	1_Johor	SMK PASIR GUDANG 2	41	Female	Malay	Degree	Married	Yes				5	6	0		No	No	68	Abdominal obese	4	6	2	4.9	105	66	5.5	0.9	1.69	3.4	Healthy	Healthy
670	360.051	1_Johor	SMK PASIR GUDANG 2	42	Female	Malay	Degree	Married	Yes	0	1	Inadequate	6	6	1146	30	No	No	92	No	2	6	6	4.9	150	95	5.8	1	2.12	3.23	Healthy	Healthy
671	360.051	1_Johor	SMK PASIR GUDANG 2	33	Male	Malay	Master and above	Married	No	0	1	Inadequate	5	5	1426.5	30	No	No	89	Abdominal obese	8	16	14	5	128	92	5.9	1.5	1.11	4.11	Healthy	Healthy
672	360.051	1_Johor	SMK PASIR GUDANG 2	34	Female	Malay	Degree	Married	Yes	0	1	Inadequate	4		1866	60	No	No	78	Abdominal obese	4	10	12	4.9	139	89	5.5	0.9	1.69	3.4	Healthy	Healthy
673	360.051	1_Johor	SMK PASIR GUDANG 2	29	Female	Malay	Degree	Married	No	0	1	Inadequate	6	8	4158	180	No	No	72	Abdominal obese	16	24	24	4.5	95	63	4.3	0.7	1.1	2.88	Healthy	Healthy
674	360.051	1_Johor	SMK PASIR GUDANG 2	30	Female	Malay	Degree	Married	Yes	1	1	Inadequate	7	9	720		No	No	73	Abdominal obese	0	0	0	5	112	71	6	1	1.89	3.66	Healthy	Healthy
675	360.051	1_Johor	SMK PASIR GUDANG 2	45	Female	Malay	Degree	Married	No	0	2	Inadequate	5	5	1920	120	No	No	70	Abdominal obese	4	6	2	4.5	127	62	4.6	1.2	1.74	2.32	Healthy	Healthy
676	360.051	1_Johor	SMK PASIR GUDANG 2	37	Female	Malay	Degree	Married	No	1			6	7	10773		No	No	69	Abdominal obese	4	8	12	4.7	107	70	3.7	0.4	1.59	1.93	Healthy	Healthy
677	360.051	1_Johor	SMK PASIR GUDANG 2	36	Female	Malay	Degree	Married	No	1	1	Inadequate	6	7	0	120	No	No	75	Abdominal obese	14	16	16	4.4	104	65	4.8	0.7	1.57	2.91	Healthy	Healthy
678	360.051	1_Johor	SMK PASIR GUDANG 2	39	Female	Malay	Degree	Single	No	1			6	6	1182		No	No	70	Abdominal obese	4	6	12	4.5	103	63	5.9	0.9	1.74	3.75	Healthy	Healthy
679	1178.07	1_Johor	SMK MAJIDI BARU 2	41	Female	Malay	Degree	Married	Yes	0			6	6	0	900	No	No	94	No	4	10	12	5.6	138	82	7.5	1.1	1.65	5.38	Healthy	Impaired fasting glucose
680	1178.07	1_Johor	SMK MAJIDI BARU 2	39	Male	Malay	Degree	Married	No	0	1	Inadequate	5	5	960			No	73	Abdominal obese	10	6	12	5	114	66	5	0.9	1.28	3.35	Healthy	Healthy
681	1178.07	1_Johor	SMK MAJIDI BARU 2	47	Male	Malay	Degree	Married	Yes	1	0	Inadequate	5	5	4104	360	No	No	106	No	0	2	4	4.9	110	70	5.3	1.2	1.74	2.99	Healthy	Healthy
682	1178.07	1_Johor	SMK MAJIDI BARU 2	48	Female	Malay	Degree	Divorced	Yes	1	1	Inadequate	6	6	1884	120	No	No	80	No	6	4	6	5.1	131	78	7.2	1	1.35	5.36	Healthy	Healthy
683	1178.07	1_Johor	SMK MAJIDI BARU 2	46	Female	Malay	Degree	Married	No	0	1	Inadequate	6	6	40		No	No	78	Abdominal obese	8	8	12	5.2	116	74	5.2	1	1.29	3.47	Healthy	Healthy
684	1178.07	1_Johor	SMK MAJIDI BARU 2	25	Male	Malay									0				77	Abdominal obese				4.5	126	70	5.5	1.1	1.43	3.57	Healthy	Healthy
685	130.748	1_Johor	SMK DATO ONN	47	Female	Malay	Degree	Married	Yes				5	6	0	60	No	No	81.5	No	0	2	2	4.7	145	83	5.3	2.6	1.2	2.92	Healthy	Healthy
686	130.748	1_Johor	SMK DATO ONN	42	Female	Malay									0				82.2	No				5.2	113	72		0.5	1.8		Healthy	Healthy
687	130.748	1_Johor	SMK DATO ONN	47	Male	Malay	Diploma	Married	Yes	1			5	5	753	240	No	No	103.3	No	6	10	2	5.1	151	94	3.9	1.9	0.8	2.24	Healthy	Healthy
688	130.748	1_Johor	SMK DATO ONN	49	Male	Malay	Degree	Married	No	1	2	Inadequate	6	6	4080	60	Yes	No	88.1	Abdominal obese	2	6	10	4.9	139	91	6.6	1.1	1.9	4.2	Healthy	Healthy
689	130.748	1_Johor	SMK DATO ONN	34	Male	Malay									0				114.8	No				4.6	143	80	5	1.3	0.8	3.61	Healthy	Healthy
690	130.748	1_Johor	SMK DATO ONN	38	Female	Malay	Degree	Married	No				5	5	5280		No	No	78.1	Abdominal obese	2	0	8	4.8	94	59	4.2	0.9	1.4	2.39	Healthy	Healthy
691	130.748	1_Johor	SMK DATO ONN	37	Male	Malay									0				98.6	No				4.7	125	69	5.8	2.5	1.5	3.16	Healthy	Healthy
692	130.748	1_Johor	SMK DATO ONN	31	Female	Malay									0				69.7	Abdominal obese				4.8	125	74	5.8	0.8	2	3.44	Healthy	Healthy
693	130.748	1_Johor	SMK DATO ONN	50	Male	Malay									0				117.2	No				4.7	146	85	6.3	2.3	1.2	4.06	Healthy	Healthy
694	130.748	1_Johor	SMK DATO ONN	45	Male	Malay									0				89	Abdominal obese				4.4	127	63	5.8	0.8	1.7	3.74	Healthy	Healthy
695	130.748	1_Johor	SMK DATO ONN	35	Female	Malay									0				77.8	Abdominal obese				4.4	123	76	5.9	0.5	1.8	3.87	Healthy	Healthy
696	130.748	1_Johor	SMK DATO ONN	47	Male	Malay									0				110.5	No				11.4		96	7.3	2.9	1.3	4.68	Undiagnosed T2DM
697	130.748	1_Johor	SMK DATO ONN	55	Male	Malay									0				115	No				7	142	83	4.2	1.4	1.4	2.16	Undiagnosed T2DM
698	130.748	1_Johor	SMK DATO ONN	49	Female	Malay									0				82.5	No				4.7	113	63	4.1	0.7	1.7	2.08	Healthy	Healthy
699	130.748	1_Johor	SMK DATO ONN	52	Female	Malay									0				94.4	No				4.7	126	62	4.8	1.5	1.2	2.92	Healthy	Healthy
700	130.748	1_Johor	SMK DATO ONN	39	Female	Malay									0				75.5	Abdominal obese				4.7	97	65	4.7	1.1	1.5	2.7	Healthy	Healthy
701	130.748	1_Johor	SMK DATO ONN	58	Female	Malay									0				85	No				5.2	152	81	6.3	1	1.5	4.35	Healthy	Healthy
702	130.748	1_Johor	SMK DATO ONN	33	Female	Malay									0				84.5	No				4.7	147	98	4.2	1.6	1.2	2.27	Healthy	Healthy
703	130.748	1_Johor	SMK DATO ONN	59	Female	Malay									0				87.8	No				4.9	142	78	6	1.2	1.8	3.66	Healthy	Healthy
704	130.748	1_Johor	SMK DATO ONN	49	Female	Malay	Degree	Married	No						0	180		No	78	Abdominal obese	6	10	10	4.9	173	87	5.6	1.5	2	2.92	Healthy	Healthy
705	130.748	1_Johor	SMK DATO ONN	48	Female	Malay									0				77.9	Abdominal obese				5	98		6.1	1	2	3.65	Healthy	Healthy
706	130.748	1_Johor	SMK DATO ONN	29	Female	Malay									0				82.5	No					101	60	6.3	0.7	2	3.98	Healthy	Healthy
707	130.748	1_Johor	SMK DATO ONN	28	Male	Malay									0				109.4	No				4.7	126	70	6.8	2.2	1.2	4.6	Healthy	Healthy
708	130.748	1_Johor	SMK DATO ONN	46	Female	Malay									0				76.5	Abdominal obese				4.7	131	76	5.4	1.5	1.3	3.42	Healthy	Healthy
709	130.748	1_Johor	SMK DATO ONN	29	Female	Malay	Degree	Married	Yes	0	2	Inadequate	5	6	3853.5		No	No	85	No	8	16	18	4.6	131	84	5.9	0.9	2.1	3.39	Healthy	Healthy
710	130.748	1_Johor	SMK DATO ONN	39	Female	Malay	Master and above	Married	No				6	6	240		No	No	76	Abdominal obese	12	12	18	4.9	94	67	3.8	0.8	1.3	2.14	Healthy	Healthy
711	130.748	1_Johor	SMK DATO ONN	35	Female	Malay									0				78.2	Abdominal obese				4	109	70	5	0.7	1.4	3.28	Healthy	Healthy
712	130.748	1_Johor	SMK DATO ONN	41	Female	Malay									0				77	Abdominal obese				4.4	112	67	5.1	0.7	1.5	3.28	Healthy	Healthy
713	130.748	1_Johor	SMK DATO ONN	34	Female	Malay									0				71	Abdominal obese				4.2	96		3.9	0.4	1.6	2.12	Healthy	Healthy
714	130.748	1_Johor	SMK DATO ONN	40	Female	Malay		Married	Yes	0	0	Inadequate	5	7	5400			No	93.5	No	0	2	0	4.6	119	75	4.6	1.8	1	2.78	Healthy	Healthy
715	130.748	1_Johor	SMK DATO ONN	51	Female	Malay									0				77.8	Abdominal obese				5.1	121	79	6.3	1.5	1.7	3.92	Healthy	Healthy
716	130.748	1_Johor	SMK DATO ONN	39	Female	Malay									0				78.2	Abdominal obese				4.7	104	68	4.9	1.1	1.8	2.6	Healthy	Healthy
717	149.426	1_Johor	SMK DATO SULAIMAN	52	Male	Malay	Diploma	Married	Yes	1	1	Inadequate	6	6	1173	350	No	No	84	Abdominal obese	4	4	8	8.3	134	87	5.9	1.9	1.4	3.64	Undiagnosed T2DM
718	149.426	1_Johor	SMK DATO SULAIMAN	51	Female	Malay	Secondary	Married	No	1	1	Inadequate	6	6	0		No	No	85	No	0	2	0	6.2	162	103	7.8	2	1.5	5.39	Undiagnosed T2DM
719	149.426	1_Johor	SMK DATO SULAIMAN	51	Female	Malay	Diploma	Married	No	1	0	Inadequate	5	7	2880	60	No	No	82	No	8	12	8	4.3	156	91	6.5	2.4	1.7	3.71	Healthy	Healthy
720	149.426	1_Johor	SMK DATO SULAIMAN	38	Female	Malay	Degree	Married	Yes	2	2	Inadequate	5	7	2730	90	No	No	82	No	6	4	6	5.5	132	82	6.2	2.6	1.4	3.62	Healthy	Healthy
721	149.426	1_Johor	SMK DATO SULAIMAN	42	Female	Malay	Degree	Married	Yes	1	1	Inadequate	6	7	5346	180	No	No	104.2	No	2	4	2	4	140	77	4.9	2	1.2	2.79	Healthy	Healthy
722	149.426	1_Johor	SMK DATO SULAIMAN	46	Female	Malay	Degree	Married	No	1	2	Inadequate	6	6	4212	30	No	No	72	Abdominal obese	2	4	4	4.9	130	79	7.1	1.1	1.7	4.9	Healthy	Healthy
723	149.426	1_Johor	SMK DATO SULAIMAN	49	Female	Malay	Degree	Single	No	2	1	Inadequate	5	6	1613	120	No	No	78.7	Abdominal obese	4	6	6	4.5	126	82	4.7	0.8	1.6	2.74	Healthy	Healthy
724	149.426	1_Johor	SMK DATO SULAIMAN	43	Female	Malay	Degree	Married	Yes	2			5	6	0		No	No	79	Abdominal obese	12	12	18	8	137	95	4.5		1.7		T2DM
725	149.426	1_Johor	SMK DATO SULAIMAN	48	Male	Malay	Degree	Married	No	1	1	Inadequate			3672	120	No	No	84	Abdominal obese	30	36	32	5.4	139	93	6.7		1.1	3.96	Healthy	Healthy
726	149.426	1_Johor	SMK DATO SULAIMAN	53	Male	Malay	Degree	Married	No	0	4	Inadequate	6	6	3450	300	No	No	87	Abdominal obese	2	12	14	4.2	154	91	6.1	1.4	1.6	3.86	Healthy	Healthy
727	149.426	1_Johor	SMK DATO SULAIMAN	38	Female	Malay	Master and above	Married	Yes	0	0	Inadequate	5	6	0		No	No	93	No	10	10	10	4.1	132	83	5.9	2.6	1.5	3.22	Healthy	Healthy
728	149.426	1_Johor	SMK DATO SULAIMAN	53	Female	Malay	Degree	Married	No	0	2	Inadequate	5	6	240		No	No	85	No	0	0	0	4.8		110	4.7	0.7	1.3	3.08	Healthy	Healthy
729	149.426	1_Johor	SMK DATO SULAIMAN	34	Female	Malay	Degree	Married	Yes	0	1	Inadequate	5	7	1311	420	No	No	66	Abdominal obese	0	4	2	4.6	144	86	5.5	1.2	1.8	3.16	Healthy	Healthy
730	149.426	1_Johor	SMK DATO SULAIMAN	40	Male	Malay	Degree	Married	Yes	1	2	Inadequate	5	5	4998	240	No	No	101	No	8	14	16	5.4	143	89	5.4	1	1.1	3.85	Healthy	Healthy
731	149.426	1_Johor	SMK DATO SULAIMAN	29	Male	Malay	Degree	Married	Yes	2	2	Inadequate	7	6	6468	120	No	No	86	Abdominal obese	4	2	4	4.3	138	86	5.4	2.1	1.1	3.35	Healthy	Healthy
732	149.426	1_Johor	SMK DATO SULAIMAN	37	Female	Malay	Degree	Married	Yes	1	2	Inadequate	5	6	2466	90	No	No	68	Abdominal obese	0	8	6	4.6	130	82		0.9	1.4	1.69	Healthy	Healthy
733	149.426	1_Johor	SMK DATO SULAIMAN	27	Female	Malay	Degree	Single	Yes	1	1	Inadequate	6	9	1200	300	No	No	95.5	No	4	12	12	4.9	130	77	4.6	1.1	1.1	3	Healthy	Healthy
734	149.426	1_Johor	SMK DATO SULAIMAN	40	Female	Malay	Degree	Married	No	1	2	Inadequate	8	7	720	60	No	No	73	Abdominal obese	0	0	0	4.2	122	101	6.1	1.2	1.5	4.06	Healthy	Healthy
735	149.426	1_Johor	SMK DATO SULAIMAN	47	Male	Malay	Master and above	Married	No	1	1	Inadequate	5	5	5100	300	No	No	91.2	No	0	2	4	5	121	76	5.7	1	1.3	3.95	Healthy	Healthy
736	149.426	1_Johor	SMK DATO SULAIMAN	36	Female	Malay	Degree	Married	Yes	2			6	6	2226	120	No	No	69	Abdominal obese	2	12	12		142	98	5.8	1	1.4	3.95	Healthy	Healthy
737	149.426	1_Johor	SMK DATO SULAIMAN	48	Female	Malay	Degree	Married	No	1	1	Inadequate	5	5	2475	450	No	No	70	Abdominal obese	2	0	4	4.5	116	74	6.4	1.2	1.3	4.56	Healthy	Healthy
738	149.426	1_Johor	SMK DATO SULAIMAN	51	Female	Malay	Degree	Married	Yes	1	2	Inadequate	6	7	3474	60	No	No	83	No	14	12	18	4.3	123	83	6	0.8		3.24	Healthy	Healthy
739	149.426	1_Johor	SMK DATO SULAIMAN	45	Female	Malay	Degree	Married	No	1	4	Inadequate	8	9	965	360	No	No	76	Abdominal obese	0	0	6	4.2	125	86	5.8	2.3	1.5	3.26	Healthy	Healthy
740	149.426	1_Johor	SMK DATO SULAIMAN	45	Male	Malay	Degree	Married	No	1	4	Inadequate			8403	65	Yes	No	88	Abdominal obese	2	4	4	4.8	141	85	7.2	1.1	1.8	4.9	Healthy	Healthy
741	149.426	1_Johor	SMK DATO SULAIMAN	49	Male	Malay	Degree	Married	No	1	1	Inadequate	5	6	1468.5	210	Yes	No	80	Abdominal obese	14	16	16	4.9	118	72	5.8	1	1.6	3.75	Healthy	Healthy
742	149.426	1_Johor	SMK DATO SULAIMAN	44	Female	Malay	Degree	Married	Yes	1			5	6	1440	300	No	No	76	Abdominal obese	2	2	10	4.2	131	78	4.8	1.7	1.1	2.93	Healthy	Healthy
743	71.992	1_Johor	SMK BANDAR EASTER	44	Female	Malay	Degree	Married	Yes	1	2	Inadequate	6	7	5502	60	No	No	95	No	16	16	16	4.5	116	81	7.5	1.3	1.49	5.42	Healthy	Healthy
744	71.992	1_Johor	SMK BANDAR EASTER	46	Female	Malay	Degree	Married	No	1	1	Inadequate	4	7	1746		No	No	77	Abdominal obese	2	2	6	4.7	129	69	6.1	1.1	1.79	3.81	Healthy	Healthy
745	71.992	1_Johor	SMK BANDAR EASTER	38	Male	Malay	Degree	Married	No	1	1	Inadequate	6	7	2700	120	No	No	107	No	12	14	14	5.7	141	77	6.9	2.7	1.34	4.33	Healthy	Impaired fasting glucose
746	71.992	1_Johor	SMK BANDAR EASTER	49	Male	Malay	Degree	Married	No	0	0	Inadequate	5	5	876	120	No	No	89	Abdominal obese	0	4	2	4.8	144	78	5.6	1	1.27	3.88	Healthy	Healthy
747	71.992	1_Johor	SMK BANDAR EASTER	34	Female	Malay	Degree	Married	No	1	1	Inadequate	4	8	686.5	30	No	No	82	No	2	6	4	5	111	61	7.2	1.1	1.86	4.84	Healthy	Healthy
748	71.992	1_Johor	SMK BANDAR EASTER	44	Female	Malay	Degree	Married	No	0	1	Inadequate	5	6	558	120	No	No	82.5	No	0	8	2	5.7	117	62	6.4	0.9	1.87	4.12	Healthy	Impaired fasting glucose
749	71.992	1_Johor	SMK BANDAR EASTER	34	Female	Malay	Degree	Married	No	0	1	Inadequate	7	8	1257	120	No	No	67	Abdominal obese	4	6	8	4.8	107	66	5.5	0.9	1.89	3.2	Healthy	Healthy
750	71.992	1_Johor	SMK BANDAR EASTER	31	Female	Malay	Degree	Married	No	0	2	Inadequate	7	7	240	240	No	No	75	Abdominal obese	12	16	16	4.9	107	71	4.9	0.4	1.6	3.12	Healthy	Healthy
751	71.992	1_Johor	SMK BANDAR EASTER	46	Male	Malay	Degree	Married	No	1	1	Inadequate	5	5	4302	120	No	No	85	Abdominal obese	0	4	2	5.3	120	72	6.4	1.5	1.43	4.29	Healthy	Healthy
752	71.992	1_Johor	SMK BANDAR EASTER	39	Female	Malay	Degree	Married	Yes	0	0	Inadequate	5	5	73	10	No	No	66	Abdominal obese	12	14	14	4.8	112	67	4.8	0.5	1.86	2.71	Healthy	Healthy
753	71.992	1_Johor	SMK BANDAR EASTER	56	Female	Malay	Degree	Married	Yes	0	1	Inadequate	7	7	99		No	No	90	No	0	4	8	9.3	141	89	5.4	1.7	1.21	3.42	T2DM
754	71.992	1_Johor	SMK BANDAR EASTER	41	Male	Malay	Degree	Married	No	0	1	Inadequate	6	6	0		No	No	83	Abdominal obese	8	8	10	5	138	91	5.7	1.2	1.3	3.86	Healthy	Healthy
755	71.992	1_Johor	SMK BANDAR EASTER	28	Female	Malay	Degree	Married	No	1	1	Inadequate	8	8	1998	40	No	No	62.5	Abdominal obese	4	4	6	4.7	103	66	7	0.9	2.1	4.49	Healthy	Healthy
756	71.992	1_Johor	SMK BANDAR EASTER	27	Male	Malay	Degree	Single	No	1	1	Inadequate	6		960		No	No	95	No	12	4	18	5.2	134	86	5.4	1.1	1.33	3.57	Healthy	Healthy
757	71.992	1_Johor	SMK BANDAR EASTER	35	Female	Malay	Master and above	Married	No	7	2	Inadequate	5	7	582		No	No	83	No	0	2	4	5.3	123	67	4.4		0.79		Healthy	Healthy
758	71.992	1_Johor	SMK BANDAR EASTER	29	Female	Malay	Degree	Single	Yes	1	1	Inadequate	6	8	0	90	No	No			6	10	14	5.8	145	98	5.7	1.9	1.52	3.32	Healthy	Impaired fasting glucose
759	71.992	1_Johor	SMK BANDAR EASTER	29	Male	Malay	Degree	Married	Yes	1	1	Inadequate	6	6	1440			No	81	Abdominal obese	0	6	4	4.8	130	71	5.2	1.5	1.09	3.43	Healthy	Healthy
760	71.992	1_Johor	SMK BANDAR EASTER	49	Male	Chinese	Degree	Married	No	0	1	Inadequate	6	5	1230	120	No	No	95	No	2	0	2	5.5	123	86	4.7	1.6	1.28	2.69	Healthy	Healthy
761	71.992	1_Johor	SMK BANDAR EASTER	39	Female	Malay	Degree	Married	Yes	0	0	Inadequate	7	7	706.5		No	No	74	Abdominal obese	4	4	6	5.2	113	66	5.7	1.4	1.28	3.78	Healthy	Healthy
762	71.992	1_Johor	SMK BANDAR EASTER	43	Female	Malay	Degree	Married	Yes	2	2	Inadequate	6	7	1786.5	120	No	No	66.5	Abdominal obese	10	16	18	4.6	125	76	4.1	0.7	1.73	2.05	Healthy	Healthy
763	284.167	1_Johor	SMK TENANG STESEN	42	Male	Malay	Degree	Married		0	1	Inadequate	5	6	0		Yes	No	105	No	10	14	14	7.1	140	95	5.2	1.6	1.3	3.17	Undiagnosed T2DM
764	284.167	1_Johor	SMK TENANG STESEN	38	Male	Malay	Degree	Married	Yes	0	4	Inadequate	7	7	0		Yes	No	97	No	2	8	2	4.4	131	91	5.5	0.8	1.5	3.64	Healthy	Healthy
765	284.167	1_Johor	SMK TENANG STESEN	38	Male	Malay	Degree	Married	Yes	0	1	Inadequate	6	5	339		No	No	103	No	2	8	6	9.8	135	79	5.3	1	0.9	3.95	Undiagnosed T2DM
766	284.167	1_Johor	SMK TENANG STESEN	45	Female	Malay									0				81	No				5.9	121	76	5.4	1.6	1.4	3.27	Healthy	Impaired fasting glucose
767	284.167	1_Johor	SMK TENANG STESEN	53	Male	Malay	Degree	Married	Yes						0		No	No	98	No				9.5	170	110		1.2	2		Undiagnosed T2DM
768	284.167	1_Johor	SMK TENANG STESEN	38	Male	Malay	Degree	Married	Yes	1	1	Inadequate	5	6	0		No	No	103	No	12	6	14	7.2	162	111	5.9	2.2	1.3	3.6	Undiagnosed T2DM
769	284.167	1_Johor	SMK TENANG STESEN	52	Female	Malay	Degree	Married	Yes	1	2	Inadequate	5	5	1575	480	No	No	83	No	6	4	10	6.4	136	88	6.4	1.4	1.9	3.86	Undiagnosed T2DM
770	284.167	1_Johor	SMK TENANG STESEN	31	Female	Malay									0				84	No				5.8	132	94	5.7	1.1	1.3	3.9	Healthy	Impaired fasting glucose
771	170.909	1_Johor	SMK ST ANDREW	32	Male	Malay	Degree	Married	No	2	2	Inadequate	7	8	4158	45	No	No	94.5	No	6	2	12	5.4	158	110	5.8	1.5	1.23	3.85	Healthy	Healthy
772	170.909	1_Johor	SMK ST ANDREW	36	Male	Chinese	Degree	Single	Yes	0	1	Inadequate	5	7	247.5	210	No	No	79	Abdominal obese	6	4	14	5.1	146	88	4.9	1	1.17	3.31	Healthy	Healthy
773	170.909	1_Johor	SMK ST ANDREW	48	Male	Malay	Degree	Married	Yes	2	1	Inadequate	6	5	198	360	Yes	No	93	No	6	12	14	4.5	169	105	6.7	1.3	1.75	4.32	Healthy	Healthy
774	170.909	1_Johor	SMK ST ANDREW	32	Male	Malay	Degree	Married	No	0	1	Inadequate	8	8	0			No	66	Abdominal obese	0	0	2	4.7	123	80	4.8	0.6	1	3.47	Healthy	Healthy
775	170.909	1_Johor	SMK ST ANDREW	54	Male	Malay	Degree	Married	Yes	1	1	Inadequate	7	8	1386		Yes	No	76	Abdominal obese	2	6	8	4.6	123	80	4.8	1.4	1.17	3.04	Healthy	Healthy
776	170.909	1_Johor	SMK ST ANDREW	48	Female	Chinese	Degree	Married	No	2	2	Inadequate	7	8	6078	180	No	Yes	64	Abdominal obese	16	14	22	4.8	121	73	6.7	0.8	1.9	4.45	Healthy	Healthy
777	170.909	1_Johor	SMK ST ANDREW	58	Male	Malay		Married	Yes	0			8	8	2079	360	Yes	No	99.5	No	10	10	10	5.3	148	82	6.6	1.2	1.16	4.86	Healthy	Healthy
778	170.909	1_Johor	SMK ST ANDREW	56	Female	Chinese	Degree	Married	No	2	2	Inadequate	6	7	0		No	No	79.5	Abdominal obese	2	2	2	4.1	111	74	4.3	0.9	1.28	2.57	Healthy	Healthy
779	170.909	1_Johor	SMK ST ANDREW	32	Male	Malay	Degree	Married	No	1	1	Inadequate	6	4	5985	30	Yes	No	76.5	Abdominal obese	0	4	6	5.1	127	83	6.2	0.9	1.55	4.2	Healthy	Healthy
780	170.909	1_Johor	SMK ST ANDREW	51	Male	Malay	Degree	Married	Yes	2	1	Inadequate			0		No	No	80.5	Abdominal obese	0	0	0	5.4	131	76	4.9	0.9	1.17	3.3	Healthy	Healthy
781	170.909	1_Johor	SMK ST ANDREW	56	Female	Chinese	Degree	Married	No	3			5	6	2970	300	No	Yes	74.5	Abdominal obese	12	10	6	4.8	113	61	5.5	0.8		2.72	Healthy	Healthy
782	170.909	1_Johor	SMK ST ANDREW	35	Female	Malay	Degree	Single	No	1	7	Inadequate	5	7	198		No	No	66.9	Abdominal obese	36	38	30	4.4	112	70	7	0.8	2.1	4.55	Healthy	Healthy
783	170.909	1_Johor	SMK ST ANDREW	53	Male	Chinese	Degree	Married	Yes	3	1	Inadequate		7	49.5	300	No	No	92	No	2	2	0	6.7	130	76			1.25		Undiagnosed T2DM
784	170.909	1_Johor	SMK ST ANDREW	27	Female	Malay	Degree	Single		0	1	Inadequate	6	8	165	120	No	No	81	No	14	14	14	4.8	139	79	5.2	0.8	1.58	3.21	Healthy	Healthy
785	170.909	1_Johor	SMK ST ANDREW	44	Female	Malay	Degree	Married	Yes	0	1	Inadequate	4	5	495	120	No	No	70.5	Abdominal obese	0	4	0	4.6	144	83	4.3	1.6	1.55	1.98	Healthy	Healthy
786	174.872	1_Johor	SMK GEMEREH	56	Female	Malay	Degree	Married	Yes	0	1	Inadequate	5	5	198		No	No	96	No	0	2	2	11.7	152	88	6.4	1.4	1.61	4.15	Undiagnosed T2DM
787	174.872	1_Johor	SMK GEMEREH	51	Male	Malay									0				102.5	No				9.6	130	85	6.5	2.5	1.21	4.15	Undiagnosed T2DM
788	174.872	1_Johor	SMK GEMEREH	27	Female	Malay	Degree	Married	Yes	2	1	Inadequate	7	8	2388	300	No	No	86	No	4	4	6	4.4	112	59	5.1	1	1.24	3.41	Healthy	Healthy
789	174.872	1_Johor	SMK GEMEREH	40	Male	Malay	Degree	Married	Yes	1	3	Inadequate	7	8	1110	120	No	No	96	No	16	18	22	5.1	126	85	5.4	1.7	1.76	2.87	Healthy	Healthy
790	174.872	1_Johor	SMK GEMEREH	52	Female	Malay									0				78	Abdominal obese				6.5	161	93	5.8	1.9	1.77	3.17	Undiagnosed T2DM
791	174.872	1_Johor	SMK GEMEREH	46	Female	Malay	Degree	Married	No	0	2	Inadequate	6	8	0	420	No	No	77	Abdominal obese	0	2	0	4.4	108	68	5.1	1.3	1.45	3.06	Healthy	Healthy
792	174.872	1_Johor	SMK GEMEREH	28	Male	Malay	Degree	Married	Yes	2	1	Inadequate		5	1828	480	No	No			14	14	14		143	77					Healthy	Healthy
793	174.872	1_Johor	SMK GEMEREH	28	Male	Malay	Degree	Married	Yes	0	1	Inadequate	6	6	780		No	No	99	No	0	0	2	5.2	133	77	5.5	1.3	1.28	3.63	Healthy	Healthy
794	174.872	1_Johor	SMK GEMEREH	44	Female	Malay	Degree	Married	Yes	2			5	6	2232	300	No	No	95	No	2	16	12	10.2	143	78	6		1.33	3.22	T2DM
795	174.872	1_Johor	SMK GEMEREH	25	Female	Malay	Degree	Married	No	1	1	Inadequate	5	6	1965	30	No	No	62.5	Abdominal obese	14	22	22	4.7	103	70	5.1	0.6	2.07	2.76	Healthy	Healthy
796	174.872	1_Johor	SMK GEMEREH	32	Female	Malay	Degree	Single	Yes	0	2	Inadequate	7	7	360		No	No	70.5	Abdominal obese	14	6	12	4.4	113	59	6.5	1.4	1.52	4.34	Healthy	Healthy
797	174.872	1_Johor	SMK GEMEREH	46	Female	Malay	Degree	Married	No	2	1	Inadequate	7	7	3591	3	No	No	71	Abdominal obese	12	10	14	4.9	133	83	5.8	0.8	2.17	3.27	Healthy	Healthy
798	174.872	1_Johor	SMK GEMEREH	28	Female	Malay	Degree	Married	Yes	0	0	Inadequate	7	7	960	90	No	No	69.5	Abdominal obese	10	24	18	4.7	115	60		0.4	1.43	1.79	Healthy	Healthy
799	170.909	1_Johor	SMK LENGA	39	Male	Malay	Degree	Married	Yes	1	1	Inadequate	5	6	528	180	No	No	104	No	4	14	8	5.3	153	95	5.5	1.1	1.2	3.78	Healthy	Healthy
800	170.909	1_Johor	SMK LENGA	46	Male	Malay	Degree	Married	No	1	1	Inadequate	6	7	2514	300	No	No	77	Abdominal obese	4	12	8	4.5	131	87	6	1.3	1.77	3.7	Healthy	Healthy
801	170.909	1_Johor	SMK LENGA	42	Male	Malay	Degree	Married	No	1	1	Inadequate	5	5	1373	45	No	No	90	No	2	2	4	4.8	136	89	4.7	1.9	1.11	2.72	Healthy	Healthy
802	170.909	1_Johor	SMK LENGA	49	Male	Malay	Diploma	Married	No	1	3	Inadequate	8	8	9828	135	No	No	94	No	8	6	8	5	150	94	6.7	1.3	1.56	4.51	Healthy	Healthy
803	170.909	1_Johor	SMK LENGA	46	Male	Malay	Master and above	Married	No	0	0	Inadequate	5	6	1422	120	No	No	85	Abdominal obese	0	4	4	5.6	124	80	6.3	1	1.71	4.18	Healthy	Impaired fasting glucose
804	170.909	1_Johor	SMK LENGA	55	Male	Malay	Degree	Married	Yes	1			5	5	15222		No	No	89	Abdominal obese	4	2	4	4.2	127	75	6.3	1.8	1.41	4.03	Healthy	Healthy
805	170.909	1_Johor	SMK LENGA	31	Male	Malay	Degree	Married	Yes	1	1	Inadequate	7	7	240		No	No	66	Abdominal obese	12	14	14	4.4	110	68		0.8	0.86	2.2	Healthy	Healthy
806	170.909	1_Johor	SMK LENGA	32	Male	Malay	Secondary	Married	No	1	0	Inadequate	8	6	99	300	No	No			26	28	24	7	159	91	6	2.4	1.04	3.92	Undiagnosed T2DM
807	170.909	1_Johor	SMK LENGA	30	Female	Malay	Degree	Married	Yes	1	2	Inadequate	4	6	678	180	No	No	70	Abdominal obese	8	4	10	4.5	107	59	4.8	0.8	1.35	3.08	Healthy	Healthy
808	170.909	1_Johor	SMK LENGA	33	Female	Malay	Degree	Single	Yes	0			6	7	720		No	No	81	No	0	4	0	5	137	72	6.1	1.3	1.35	4.15	Healthy	Healthy
809	170.909	1_Johor	SMK LENGA	32	Male	Malay	Degree	Married	No	0	1	Inadequate	5	6	1257		No	No	81	Abdominal obese	0	0	2	4.8	139	70	4.9	1.4	1.16	3.08	Healthy	Healthy
810	170.909	1_Johor	SMK LENGA	45	Female	Malay	Degree	Married	No	1	7	Inadequate	7	6	720	120	No	No	73	Abdominal obese	0	0	0	4.9	142	75	6.4	0.8	1.98	4.11	Healthy	Healthy
811	170.909	1_Johor	SMK LENGA	34	Female	Malay	Degree	Married	No	2	1	Inadequate	5	7	189.5	240	No	No	90	No	0	0	0	4.9		100	5.4	1	1.34	3.56	Healthy	Healthy
812	170.909	1_Johor	SMK LENGA	36	Female	Chinese	Secondary	Married	No	1	1	Inadequate	6	8	289.5	90	No	No	71	Abdominal obese	0	0	0	4.8	122	85	4.8	1.3	1.04	3.21	Healthy	Healthy
813	232.44	1_Johor	SMK SERI GADING	50	Male	Malay	Diploma	Married	Yes				5	6	462	180		No	92	No	0	0	0	5.1	133	95	5.6		1	3.15	Healthy	Healthy
814	232.44	1_Johor	SMK SERI GADING	46	Female	Malay	Degree	Married	No	1	0	Inadequate	6	7	5838	480	No	No	67	Abdominal obese	0	4	0	5.1	122	75	5	0.7	1.7	2.98	Healthy	Healthy
815	232.44	1_Johor	SMK SERI GADING	36	Female	Malay	Degree	Married	Yes	1	2	Inadequate	7	6	0		No	No	87	No	8	14	12	4.3	150	80	6.2	1.2	1.4	4.26	Healthy	Healthy
816	232.44	1_Johor	SMK SERI GADING	33	Female	Malay	Degree	Married	No	1	1	Inadequate	7	8	525	30	No	No	80	No	2	4	4	4.9	114	67	4.2	0.8	1.6	2.24	Healthy	Healthy
817	232.44	1_Johor	SMK SERI GADING	32	Female	Malay	Degree	Married	Yes	1	2	Inadequate	6	7	702	120	No	No	63	Abdominal obese	4	6	10	4.8	125	74	4.4	1.6	1.8	1.87	Healthy	Healthy
818	232.44	1_Johor	SMK SERI GADING	32	Female	Malay	Degree	Married	Yes	1	1	Inadequate	7	8	2400		No	No	77	Abdominal obese	2	6	10	4.6	111	63	5.3	0.8	1.5	3.44	Healthy	Healthy
819	232.44	1_Johor	SMK SERI GADING	35	Female	Malay	Degree	Married	Yes	0	1	Inadequate	5	4	1140		No	No	75	Abdominal obese	12	8	10	4.3	100		5.5	1	1.6	3.45	Healthy	Healthy
820	232.44	1_Johor	SMK SERI GADING	28	Female	Malay	Degree	Married	Yes	0	2	Inadequate	6	6	2586	30	No	No	64	Abdominal obese	14	12	18	4.9	131	86	4.7	0.8	1.9	2.44	Healthy	Healthy
821	232.44	1_Johor	SMK SERI GADING	33	Female	Malay	Master and above	Married	No	1	1	Inadequate	6	8	306	120	No	No	74	Abdominal obese				4.5	114	66	5.5	1.8	1.2	3.48	Healthy	Healthy
822	232.44	1_Johor	SMK SERI GADING	24	Female	Malay	Degree	Single	Yes	0	1	Inadequate	6	7	0		No	No	70	Abdominal obese	10	16	22	4.7	111	62	5.6	1	1.9	3.25	Healthy	Healthy
823	232.44	1_Johor	SMK SERI GADING	43	Male	Malay									0				96	No				4.3	142	90	6.3	2.6	1.3	3.82	Healthy	Healthy
824	232.44	1_Johor	SMK SERI GADING	29	Female	Malay	Degree	Married		0	1	Inadequate	6	7	1071	60		No	70	Abdominal obese	4	6	4	4.4	118	76	4.5	0.6	1.6	2.63	Healthy	Healthy
825	232.44	1_Johor	SMK SERI GADING	52	Male	Malay	Master and above	Married	No	3	7	Adequate	6	6	2772	120		No	86.5	Abdominal obese	6	8	4	5.6	122	72	4.6	2.7	1	2.37	Healthy	Impaired fasting glucose
826	232.44	1_Johor	SMK SERI GADING	32	Female	Malay	Degree	Married	Yes	1	0	Inadequate	4	7	0		No	No	71.5	Abdominal obese	6	4	12	5.3	125	79	6.5	2.9	1.2	3.98	Healthy	Healthy
827	232.44	1_Johor	SMK SERI GADING	57	Female	Malay	Degree	Married	No	2	7	Adequate	7	7	0		No	No	69	Abdominal obese	0	0	0	4.7	151	82	6.5	1.2	1.9	4.06	Healthy	Healthy
828	232.44	1_Johor	SMK SERI GADING	50	Male	Malay	Master and above	Married	No	0	1	Inadequate	6	6	198	60	Yes	No	76.5	Abdominal obese	0	0	0	4.8	128	81	5.2	1.1	1.4	3.3	Healthy	Healthy
829	232.44	1_Johor	SMK SERI GADING	31	Female	Malay									0				75	Abdominal obese				4.4	108	74	5.5	1.3	2.2	2.71	Healthy	Healthy
830	232.44	1_Johor	SMK SERI GADING	54	Male	Malay	Degree	Married		1	7	Inadequate	6	6	1440	120	No	No	90	No	0	0	4	5.9	124	81	6.1	0.9	1.4	4.29	Healthy	Impaired fasting glucose
831	883.55	1_Johor	SMK TAMAN PELANGI	26	Female	Malay	Degree	Married	Yes	0	2	Inadequate	7	6	487.5		No	No	70	Abdominal obese	6	10	14	5.1	116	82		1.2	1	1.96	Healthy	Healthy
832	883.55	1_Johor	SMK TAMAN PELANGI	31	Female	Malay	Degree	Married	Yes	1	2	Inadequate	6	6	0		No	No	83	No	10	10	12	4.7	118	78	6.1	1.5	1.8	3.62	Healthy	Healthy
833	883.55	1_Johor	SMK TAMAN PELANGI	27	Female	Malay	Degree	Married	No	0	1	Inadequate	7	8	7812	300	No	No	79	Abdominal obese	0	8	4	4.6	105	68	5.3	1.2	1.7	3.06	Healthy	Healthy
834	883.55	1_Johor	SMK TAMAN PELANGI	32	Female	Malay	Degree	Married	No	1	2	Inadequate	8	8	1200		No	No	83	No	10	2	8	4.9	108		4.9	0.7	1.4	3.18	Healthy	Healthy
835	883.55	1_Johor	SMK TAMAN PELANGI	29	Female	Malay	Degree	Married	No	2	1	Inadequate	6	8	2160		No	No	61	Abdominal obese	6	8	12		105	66	6.6	0.4	2.1	4.32	Healthy	Healthy
836	883.55	1_Johor	SMK TAMAN PELANGI	42	Female	Malay	Degree	Married	Yes	2			5	5	165		No	No	77	Abdominal obese	6	14	14	9.8	131	77	6.7		1.5	3.79	T2DM
837	883.55	1_Johor	SMK TAMAN PELANGI	32	Female	Malay	Degree	Single	No	1	1	Inadequate	4	5	1866	60	No	No	65	Abdominal obese	0	4	2	5.4	111	73	4.6	0.7	2.1	2.18	Healthy	Healthy
838	883.55	1_Johor	SMK TAMAN PELANGI	36	Female	Malay	Master and above	Married	Yes	1	4	Inadequate	4	6	2400		No	No	91	No	8	8	8	4.6	143	91	4.1	0.7	1.4	2.38	Healthy	Healthy
839	336.59	1_Johor	SMK GELANG PATAH	44	Female	Chinese	Degree	Married	Yes	0	1	Inadequate	8	8	0		No	No	94	No	16	12	16	4.6	155	86	5.3	0.8	1.7	3.24	Healthy	Healthy
840	336.59	1_Johor	SMK GELANG PATAH	40	Female	Malay									0				70	Abdominal obese				4.9	120		3.8	0.8	1.2	2.24	Healthy	Healthy
841	336.59	1_Johor	SMK GELANG PATAH	45	Female	Malay	Degree	Married	Yes	1	1	Inadequate	6	7	2085		No	No	96	No	4	0	8	6.3	120	78	5.8	1.9	1.3	3.64	Undiagnosed T2DM
842	336.59	1_Johor	SMK GELANG PATAH	29	Female	Malay	Degree	Single	No	0	4	Inadequate	5	5	480		No	No	73	Abdominal obese	2	4	4	4.6	108	75	5.7	1.2	1.5	3.66	Healthy	Healthy
843	336.59	1_Johor	SMK GELANG PATAH	34	Female	Malay	Degree	Married	No	0	1	Inadequate	5	6	5118	180	No	No	73	Abdominal obese	12	12	12	4.4	116	78	4.6	0.8	1.4	2.84	Healthy	Healthy
844	336.59	1_Johor	SMK GELANG PATAH	38	Male	Malay	Degree	Married	Yes	0	1	Inadequate	6	6	12030	120	Yes	No	111	No	0	0	0	5.1	117	71	5.9	2.7	1	3.67	Healthy	Healthy
845	336.59	1_Johor	SMK GELANG PATAH	46	Female	Malay	Degree	Married	Yes	2	2	Inadequate	5		3159	60	No	No	81	No	14	10	16	4.9	117	79	5.9	1.2	1.7	3.66	Healthy	Healthy
846	336.59	1_Johor	SMK GELANG PATAH	32	Female	Malay	Degree	Single		0	1	Inadequate	8		240	120	No	No	69	Abdominal obese	0	2	0	4.8	114	65	5.2	0.8	1.5	3.34	Healthy	Healthy
847	336.59	1_Johor	SMK GELANG PATAH	48	Female	Malay	Degree	Married	Yes	0	1	Inadequate	6	7	2880	120	No	No	81	No	4	14	8	5.1	109	59	4.2	0.4	1.8	2.22	Healthy	Healthy
848	336.59	1_Johor	SMK GELANG PATAH	34	Male	Malay	Secondary	Married	Yes	0	0	Inadequate	6	8	1188	180		No	102	No	8	6	10	5	139	81	6.4		1.1	3.57	Healthy	Healthy
849	336.59	1_Johor	SMK GELANG PATAH	28	Female	Malay	Degree	Single	No	0	1	Inadequate	6	6	1191		No	No	82	No	4	6	8	4.6	115	73	3.7	0.8	1.5	1.84	Healthy	Healthy
850	336.59	1_Johor	SMK GELANG PATAH	37	Female	Malay	Degree	Married	Yes	1	0	Inadequate	5	8	1920	120	No	No	88	No	16	12	14	5.2	126	64	4.6	1.6	1.2	2.67	Healthy	Healthy
851	336.59	1_Johor	SMK GELANG PATAH	29	Female	Malay	Degree	Married	Yes	0	1	Inadequate	5	5	0	300	No	No	73	Abdominal obese	0	2	2	4.6	111	59	3.7	0.8	1.2	2.14	Healthy	Healthy
852	336.59	1_Johor	SMK GELANG PATAH	37	Female	Indian	Degree	Married	Yes	1	1	Inadequate	4	6	4026		No	No	88	No	6	8	10	4.6	112	68	5.3	1	1.4	3.45	Healthy	Healthy
853	336.59	1_Johor	SMK GELANG PATAH	30	Female	Malay	Degree	Married	No	0	1	Inadequate	6	6	645		No	No	80	No	8	12	12	4.1	126	74	5	0.6	2.2	2.53	Healthy	Healthy
854	336.59	1_Johor	SMK GELANG PATAH	31	Female	Malay	Degree	Single		0	0	Inadequate	6	7	1440		No	No	68	Abdominal obese	0	2	4	5.2	122	64	4	0.8	1.6	2.04	Healthy	Healthy
855	336.59	1_Johor	SMK GELANG PATAH	42	Female	Malay	Degree	Married	Yes	0	1	Inadequate	5	7	5226	360	No	No	80	No	6	2	14	5.2	138	67	5.8	1.2	1.3	3.96	Healthy	Healthy
856	336.59	1_Johor	SMK GELANG PATAH	37	Female	Malay	Degree	Married	No	4			5	5	1009.5	180	No	No	69	Abdominal obese	10	14	14	4.9	120	80	4.6	0.7	1.7	2.58	Healthy	Healthy
857	336.59	1_Johor	SMK GELANG PATAH	34	Female	Indian	Degree	Married	Yes	1	2	Inadequate	7	7	777		No	No	84	No	10	12	14	5.2	128		3.6	0.7	1.1	2.18	Healthy	Healthy
858	336.59	1_Johor	SMK GELANG PATAH	40	Female	Malay	Degree	Married		1	2	Inadequate	5	6	2772		No	No	83	No	0	2	2	5.2	109	71	4.1	0.8	1.4	2.34	Healthy	Healthy
859	336.59	1_Johor	SMK GELANG PATAH	31	Female	Malay	Degree	Married	Yes	0	1	Inadequate	5	6	586.5	30		No	89	No	2	2	2	4.8	116	75	5.5	0.8	1.8	3.34	Healthy	Healthy
860	169.436	1_Johor	SMK PASIR GUDANG	56	Female	Malay	Degree	Married					6	7	198		No	No	76	Abdominal obese				4.7	120	81	5	1.5	1.4	3.06	Healthy	Healthy
861	169.436	1_Johor	SMK PASIR GUDANG	46	Female	Malay	Degree	Married		1	4	Inadequate	4	4	5040				88	No	10	16	16	4.8	120	82	5.1	1.2	1.5	3.06	Healthy	Healthy
862	169.436	1_Johor	SMK PASIR GUDANG	41	Female	Malay									0				82	No				15.8	129	76	6.8	1.3	1.3	4.91	Undiagnosed T2DM
863	169.436	1_Johor	SMK PASIR GUDANG	42	Female	Malay	Degree	Married	Yes	0			5	5	7920	220		No	62	Abdominal obese	14	12	12	5.1	107	72	5	0.4	1.7	3.12	Healthy	Healthy
864	169.436	1_Johor	SMK PASIR GUDANG	29	Male	Malay	Degree	Married	Yes	1	1	Inadequate			3588	360		No	92	No	4	4	6	5	128	76	7.1	2.2	1.2	4.9	Healthy	Healthy
865	169.436	1_Johor	SMK PASIR GUDANG	53	Female	Malay									0				100	No				5.1	142	92	5.3	2.4	1.2	3.01	Healthy	Healthy
866	169.436	1_Johor	SMK PASIR GUDANG	35	Female	Malay		Married	Yes	0	1	Inadequate	6	7	0	120	No	No	90	No	4	8	8	5.4	131	72	5.2	1.3	1.2	3.41	Healthy	Healthy
867	169.436	1_Johor	SMK PASIR GUDANG	43	Female	Malay	Degree	Married	Yes	1	0	Inadequate			7038		No		99	No	4	12	18	5.3	140	85	4.5	0.8	1.8	2.34	Healthy	Healthy
868	169.436	1_Johor	SMK PASIR GUDANG	43	Female	Malay	Degree	Married	No				6	7	5118	300	No	No	89	No	8	10	12	4.7	114	74	4	1.3	1.4	2.01	Healthy	Healthy
869	169.436	1_Johor	SMK PASIR GUDANG	35	Male	Malay	Degree	Married	No	1	1	Inadequate	5	6	2400	270	No	No	82	Abdominal obese	12	14	16		116	76	5.3	0.8	2	2.94	Healthy	Healthy
870	169.436	1_Johor	SMK PASIR GUDANG	29	Female	Malay	Secondary	Married	Yes	1	1	Inadequate	5	6	346.5		No	No	66	Abdominal obese	14	6	10	4.7	121	66	4.5	2.1	1	2.55	Healthy	Healthy
871	169.436	1_Johor	SMK PASIR GUDANG	31	Female	Malay	Degree	Married	Yes	1	1	Inadequate	6	6	0		No	No	68	Abdominal obese	6	4	8	4.8	107	67	3.8	1.2	1.4	1.86	Healthy	Healthy
872	169.436	1_Johor	SMK PASIR GUDANG	39	Female	Malay	Degree	Married	Yes	2	1	Inadequate	6	6	240		No	No	78	Abdominal obese	0	4	16	5.3	113	76	4.6	0.7	1.1	3.18	Healthy	Healthy
873	169.436	1_Johor	SMK PASIR GUDANG	27	Male	Malay	Degree	Single	Yes	0	0	Inadequate	4	6	0		No	No	74	Abdominal obese	2	0	0	5	118	64	4.2	0.8	1.5	2.34	Healthy	Healthy
874	169.436	1_Johor	SMK PASIR GUDANG	43	Male	Malay	Master and above	Married	Yes	1	1	Inadequate	4	4	2772		Yes	No	90	No	2	8	6	4.8	114	73	4.6	2.7	1.9	2.47	Healthy	Healthy
875	169.436	1_Johor	SMK PASIR GUDANG	31	Male	Malay	Degree	Married	Yes	1	1	Inadequate	5	7	8052	180		No	88	Abdominal obese	12	10	20	4.7	140	93	5.4	1	1.3	3.65	Healthy	Healthy
876	169.436	1_Johor	SMK PASIR GUDANG	30	Female	Malay									0				72	Abdominal obese				4.4	100	59	4.3	0.4	1.6	2.52	Healthy	Healthy
877	169.436	1_Johor	SMK PASIR GUDANG	32	Female	Malay	Degree	Married	No	1	0	Inadequate	5		0	60	No	No	73	Abdominal obese	6	4	8	4.9	90		5.3	0.9	1.4	3.49	Healthy	Healthy
878	169.436	1_Johor	SMK PASIR GUDANG	34	Male	Malay									0				117	No				4.7	143	97	4.4	0.8	1.3	2.74	Healthy	Healthy
879	169.436	1_Johor	SMK PASIR GUDANG	34	Female	Malay	Degree	Married	Yes	0	1	Inadequate	5	6	247.5		No	No	87	No	8	10	16	4.6	116	61	4.5	0.8	1.6	2.54	Healthy	Healthy
880	169.436	1_Johor	SMK PASIR GUDANG	36	Female	Malay	Degree	Married	No	1			7	6	5118		No	No	73	Abdominal obese	2	2	8	4.4	102	64	4.2	0.6	1.4	2.53	Healthy	Healthy
881	169.436	1_Johor	SMK PASIR GUDANG	29	Female	Malay	Degree	Married	No	1	1	Inadequate	7	7	727.5		No	No	77	Abdominal obese		6	8	4.6	110	70	4.3	0.7	1.1	2.88	Healthy	Healthy
882	169.436	1_Johor	SMK PASIR GUDANG	28	Female	Malay	Degree	Married	Yes	0	0	Inadequate	8	8	834	30	No	No	70	Abdominal obese	2	0	14	4.4	99	61	3.9	0.4	1.4	2.32	Healthy	Healthy
883	169.436	1_Johor	SMK PASIR GUDANG	48	Female	Malay	Degree	Married	Yes	2	2	Inadequate	5	6	5358	900	No	No	84	No	2	6	6	10.8	170	86	5.9	2.1	1.4	3.55	Undiagnosed T2DM
884	169.436	1_Johor	SMK PASIR GUDANG	47	Female	Malay	Diploma	Married	No	1	1	Inadequate			0		No	No	85	No	2	8	8	5.5	142	84	4.6	1	1.5	2.65	Healthy	Healthy
885	169.436	1_Johor	SMK PASIR GUDANG	51	Male	Malay	Degree	Married	Yes	0	1	Inadequate	5	5	742.5	120			91	No	12	8	16	4.8	146	70	6.7	2.2	1.3	4.4	Healthy	Healthy
886	169.436	1_Johor	SMK PASIR GUDANG	41	Male	Malay	Degree	Married	No	1	3	Inadequate	8		1828				85	Abdominal obese				4.4	116	82	5.1	1.5	1.2	3.22	Healthy	Healthy
887	169.436	1_Johor	SMK PASIR GUDANG	32	Male	Malay	Degree	Married	No	0	1	Inadequate	5	5	1053		Yes	No	86	Abdominal obese	10	10	14	5.2	123	63	4.8	0.8	1.1	3.34	Healthy	Healthy
888	169.436	1_Johor	SMK PASIR GUDANG	32	Female	Malay	Master and above	Married	No	0	2	Inadequate	6	7	471	300	No	No	73	Abdominal obese	6	8	10	4.2	111		4.6	0.7	1.9	2.38	Healthy	Healthy
889	169.436	1_Johor	SMK PASIR GUDANG	32	Female	Malay	Degree	Married	No	7	4	Adequate			3078	300	No	No	92	No	2	8	8	4.9	122	77	4.9	0.8	1.4	3.14	Healthy	Healthy
890	169.436	1_Johor	SMK PASIR GUDANG	31	Female	Malay	Degree	Married	No	0	1	Inadequate	5	6	2400	120	No	No	67	Abdominal obese	0	2	0	4.5	96	63	4.1	0.5	2	1.87	Healthy	Healthy
891	169.436	1_Johor	SMK PASIR GUDANG	34	Female	Malay									0				82	No				4.4	106	65	5	0.5	1.4	3.37	Healthy	Healthy
892	169.436	1_Johor	SMK PASIR GUDANG	28	Male	Malay	Degree	Married	No	0	1	Inadequate	5	5	1920			No	100	No	8	10	14	4.7	115	76	5	1.6	1.2	3.07	Healthy	Healthy
893	169.436	1_Johor	SMK PASIR GUDANG	41	Female	Malay	Degree	Married	Yes	0	1	Inadequate	5	7	0		No		98	No	14	18	14	5.3	140	90	5	0.7	1.5	3.18	Healthy	Healthy
894	169.436	1_Johor	SMK PASIR GUDANG	28	Female	Malay	Degree	Married	No	2	0	Inadequate	4	4	0		No	No	64	Abdominal obese	14	6	14		106	71	4.3	0.4	1.9	2.22	Healthy	Healthy
895	169.436	1_Johor	SMK PASIR GUDANG	29	Female	Malay									0				100	No				5.2	121	69	5.3	0.6	1.7	3.33	Healthy	Healthy
896	169.436	1_Johor	SMK PASIR GUDANG	40	Female	Malay	Degree	Married	No	1	1	Inadequate	5	5	699		No	No	90	No	6	6	2	4.6	103	73	6.6	0.7	1.6	4.68	Healthy	Healthy
897	169.436	1_Johor	SMK PASIR GUDANG	27	Female	Malay									0				62	Abdominal obese				4.3	99		4.7	0.4	1.8	2.72	Healthy	Healthy
898	169.436	1_Johor	SMK PASIR GUDANG	53	Female	Malay	Degree	Married	Yes	0	3	Inadequate	6	6	720	180		No	96	No	0	2	2	4.6	128	75	6.2	1.3	2	3.61	Healthy	Healthy
899	169.436	1_Johor	SMK PASIR GUDANG	32	Female	Malay	Degree	Married	Yes	2	1	Inadequate	6	8	1786.5	180	No	No	88	No	8	8	12	4.7	131	67	3.9	0.8	1.3	2.24	Healthy	Healthy
900	169.436	1_Johor	SMK PASIR GUDANG	26	Female	Malay	Degree	Single	Yes	1	4	Inadequate	8	8	0	120	No	No	66	Abdominal obese	0	0	0	4.3	100	59	5.9	0.7	1.6	3.98	Healthy	Healthy
901	169.436	1_Johor	SMK PASIR GUDANG	33	Female	Malay	Degree	Married	Yes	1	1	Inadequate			3828	135	No	No	85	No	4	0	2	4.6	110	65	4.9	0.7	1.4	3.18	Healthy	Healthy
902	169.436	1_Johor	SMK PASIR GUDANG	38	Female	Malay	Degree		Yes	1	2	Inadequate	4	4	1533			No	88	No	28	30	28	4.3	124	75	5.2	0.9	1.3	3.49	Healthy	Healthy
903	169.436	1_Johor	SMK PASIR GUDANG	33	Female	Malay	Master and above	Married	No	0	1	Inadequate	5	6	1440		No	No	74	Abdominal obese	0	12	12	4.2			5.8	0.6	1.6	3.93	Healthy	Healthy
904	169.436	1_Johor	SMK PASIR GUDANG	31	Female	Malay									0				72	Abdominal obese					109	63	5.4	0.8	2.1	2.94	Healthy	Healthy
905	169.436	1_Johor	SMK PASIR GUDANG	38	Female	Malay	Degree	Married	No	1	2	Inadequate	6	7	5910	30	No	No	81	No	12	12	16	4.8	135	89	4.9	1.6	1	3.17	Healthy	Healthy
906	169.436	1_Johor	SMK PASIR GUDANG	41	Female	Malay	Degree	Married	Yes	2	2	Inadequate	8	8	240		No	No	108	No				4.7	167	104	4.8	1.6	1.4	2.67	T2DM
907	169.436	1_Johor	SMK PASIR GUDANG	36	Female	Indian	Degree	Married	Yes	0	1	Inadequate	6	9	4518	180	No	No	103	No	0	4	6	7.5	118	64	4.5	1.5	0.9	2.92	Undiagnosed T2DM
908	169.436	1_Johor	SMK PASIR GUDANG	32	Female	Malay	Degree	Married		2	4	Adequate	6	6	579		No	No	74	Abdominal obese	8	12	14	5	107		5	0.8	1.8	2.84	Healthy	Healthy
909	169.436	1_Johor	SMK PASIR GUDANG	31	Female	Malay	Degree	Married	No	1	1	Inadequate	5	6	6586.5	45	No	No	70	Abdominal obese	8	10	14	5.5	101	63		0.8	1.2		Healthy	Healthy
910	169.436	1_Johor	SMK PASIR GUDANG	30	Male	Malay	Degree	Married	No	1	1	Inadequate	5	8	0		No	No	63	Abdominal obese	10	10	16	4.6	118	76		1	1.3	1.75	Healthy	Healthy
911	68.862	1_Johor	SMK SEMENCHU	39	Female	Malay	Degree	Married	Yes	1	2	Inadequate	7	6	0		No	No	82	No	4	6	10	4.9	134	80	5	0.6	1.66	3.02	Healthy	Healthy
912	68.862	1_Johor	SMK SEMENCHU	24	Female	Malay	Degree	Single	No	0	1	Inadequate	5	6	3804	300	No	No	72	Abdominal obese	18	24	20	4.9	102	60	4.2	0.6	1.19	2.69	Healthy	Healthy
913	68.862	1_Johor	SMK SEMENCHU	41	Male	Malay	Secondary	Married	No	1	1	Inadequate	5	5	396	30	Yes	No	99	No	8	12	12	5.3	137	85	4.3	1.1	0.99	2.82	Healthy	Healthy
914	68.862	1_Johor	SMK SEMENCHU	47	Female	Malay	Degree	Married	No	0	0	Inadequate	8	8	960		No	No	72	Abdominal obese	8	10	10	5	121	87	4.6	0.7	1.16	3.08	Healthy	Healthy
915	68.862	1_Johor	SMK SEMENCHU	43	Female	Malay	Degree	Married		0	0	Inadequate	8	8	0	180	No	No	79	Abdominal obese	10	6	10	5	144	91	4.6	1.2	1.51	2.59	Healthy	Healthy
916	68.862	1_Johor	SMK SEMENCHU	44	Female	Malay									0				73	Abdominal obese				4.9	121	78	5.4	0.5	1.76	3.47	Healthy	Healthy
917	68.862	1_Johor	SMK SEMENCHU	43	Female	Malay	Degree	Married	No	1	2	Inadequate	6	6	1695	30	No	No	68	Abdominal obese	4	8	6	5	127	81	4.2	0.9	1.15	2.66	Healthy	Healthy
918	68.862	1_Johor	SMK SEMENCHU	38	Male	Malay	Degree	Married	No	0			7	7	0		Yes	No	83	Abdominal obese	2	6	0	4.8	124	78	7	1.2	1.52	4.94	Healthy	Healthy
919	68.862	1_Johor	SMK SEMENCHU	44	Female	Malay	Degree	Married	Yes	1	1	Inadequate	5	6	0		No	No	112	No	6	8	6	4.4	171	101	3.9	1.1	1.25	2.14	Healthy	Healthy
920	68.862	1_Johor	SMK SEMENCHU	31	Female	Malay	Degree	Married	No	0	1	Inadequate	7	6	570	20	No	No	74	Abdominal obese	2	2	4	4.7	135	80	5.5	0.9	1.56	3.56	Healthy	Healthy
921	68.862	1_Johor	SMK SEMENCHU	53	Male	Malay									0				93.5	No				5.6	132	83	4.5	0.7	1.01	3.14	Healthy	Impaired fasting glucose
922	68.862	1_Johor	SMK SEMENCHU	28	Male	Malay	Degree	Married	No	0	1	Inadequate	5	6	1440				72	Abdominal obese	6	4	14	4.7	133	73	5.4	0.8	1.53	3.45	Healthy	Healthy
923	68.862	1_Johor	SMK SEMENCHU	45	Female	Malay	Degree	Married	No	1	1	Inadequate	7	7	360	2	No	No	89	No	0	2	2	5.4	145	99	5	1.3	1.36	2.99	Healthy	Healthy
924	68.862	1_Johor	SMK SEMENCHU	25	Female	Malay	Degree	Single	Yes	1	1	Inadequate	5	6	0	180	No	No	65	Abdominal obese	8	12	12	5.2	132	80	5.5	0.6	1.94	3.27	Healthy	Healthy
925	68.862	1_Johor	SMK SEMENCHU	42	Female	Malay	Degree	Single	No	1	5	Inadequate	6	6	2970	60	No	No	64	Abdominal obese	0	0	4	4.8	111	67	5.3	0.5	1.46	3.6	Healthy	Healthy
926	68.862	1_Johor	SMK SEMENCHU	46	Female	Malay	Degree	Married	Yes	1	7	Inadequate	5	5	2970	60	No	No	74.5	Abdominal obese	4	2	8	4.4	149	88	4.6	1.4	1.14	2.75	Healthy	Healthy
927	68.862	1_Johor	SMK SEMENCHU	28	Female	Malay	Degree	Married	No	0	0	Inadequate	8	8	0		No	No	68	Abdominal obese	4	6	8	4	107	70	4.9	0.6	2	2.65	Healthy	Healthy
928	68.862	1_Johor	SMK SEMENCHU	30	Male	Malay	Degree	Married	Yes	0	1	Inadequate	5	5	459		Yes	No	85	Abdominal obese	6	4	14	5.2	135	90	5.4	1	0.94	4.02	Healthy	Healthy
929	68.862	1_Johor	SMK SEMENCHU	37	Female	Malay	Degree	Married	Yes	2	1	Inadequate	5	7	951	90	No	No	91	No	8	14	16	5.5	129	77	6.1	1.5	1.14	4.3	Healthy	Healthy
930	68.862	1_Johor	SMK SEMENCHU	29	Male	Malay	Degree	Married	Yes	0	0	Inadequate	5	5	480	120	No	No	81	Abdominal obese	6	4	14	4.6	112	71	4	1.3	1.24	2.19	Healthy	Healthy
931	68.862	1_Johor	SMK SEMENCHU	25	Female	Malay	Degree	Married	No	1	1	Inadequate	8	8	231	10	No	No	68	Abdominal obese	0	0	2	4.6	114	71	4.3	0.5	1.95	2.14	Healthy	Healthy
932	68.862	1_Johor	SMK SEMENCHU	28	Female	Malay									0				69	Abdominal obese				4.8	114	66	4.1	0.9	1.15	2.56	Healthy	Healthy
933	68.862	1_Johor	SMK SEMENCHU	30	Female	Malay									0				73	Abdominal obese				5	102	65	4.2	0.9	1.26	2.48	Healthy	Healthy
934	75.778	1_Johor	SMK SEG HWA	46	Female	Malay	Degree	Divorced	Yes	0	1	Inadequate	6	6	720		No	No	75	Abdominal obese	0	2	8	4.9	142	80	4.8	1	1.5	2.85	Healthy	Healthy
935	75.778	1_Johor	SMK SEG HWA	43	Female	Chinese	Degree	Married	No	0	1	Inadequate	6	8	1687.5	180	No	No	97.5	No	12	12	20	4.4	127	80	4.5	1.3	1.1	2.81	Healthy	Healthy
936	75.778	1_Johor	SMK SEG HWA	52	Female	Chinese	Diploma	Married	No	1	1	Inadequate	7	9	678		No	No	73	Abdominal obese		2	4	4.9	107	61	5.4	1	1.6	3.35	Healthy	Healthy
937	75.778	1_Johor	SMK SEG HWA	29	Female	Chinese	Degree	Single	No	0	1	Inadequate	7	9	0	540	No	No	62	Abdominal obese	4	8	10	4.4	111	67	4.8	0.9	1.7	2.69	Healthy	Healthy
938	75.778	1_Johor	SMK SEG HWA	33	Male	Chinese	Degree	Married	Yes	0	1	Inadequate	6	7	0	720	No	No	83	Abdominal obese	30	14	30	5.1	129	78	5.9		1.4	3.05	Healthy	Healthy
939	75.778	1_Johor	SMK SEG HWA	39	Female	Chinese	Degree	Married	Yes	2	2	Inadequate	8	8	960		No	Yes	82	No	2	2	10	4.8	116	72	4.2	0.6	1.6	2.33	Healthy	Healthy
940	75.778	1_Johor	SMK SEG HWA	34	Female	Chinese	Degree	Married	No	1	2	Inadequate	7	9	3238.5	435	No	No	66.5	Abdominal obese	12	14	14	4.5	100	63	4.9	0.5	1.7	2.97	Healthy	Healthy
941	75.778	1_Johor	SMK SEG HWA	38	Female	Chinese	Degree	Married	Yes	5	1	Inadequate	7	8	2205	240	No	No	80	No	8	8	14	4.6	118	69	4	1	1.2	2.35	Healthy	Healthy
942	75.778	1_Johor	SMK SEG HWA	29	Female	Malay	Degree	Married	Yes	0	0	Inadequate	4	6	1386	60	No	No	70	Abdominal obese	8	18	22	6.1	123	73	4.4	0.5	1.3	2.87	Undiagnosed T2DM
943	75.778	1_Johor	SMK SEG HWA	42	Female	Malay	Degree	Married	Yes	1	4	Inadequate	5	7	5118	240	No	No	85	No	6	16	12	9.9	142	88	5.4	1.1	1.2	3.7	T2DM
944	75.778	1_Johor	SMK SEG HWA	50	Male	Indian	Degree	Married	No	0	2	Inadequate	6	8	198	330	No	No	96	No	8	10	14	5.6	126	80		1.4	0.9	1.86	Healthy	Impaired fasting glucose
945	75.778	1_Johor	SMK SEG HWA	49	Male	Chinese	Degree	Married	No	0	1	Inadequate	6	7	852	120	No	Yes	85	Abdominal obese	14	14	14	5	126	75	4.6	1.3	1.1	2.91	Healthy	Healthy
946	75.778	1_Johor	SMK SEG HWA	33	Female	Malay	Degree	Married	Yes	1	1	Inadequate	6	7	1260	180	No	No	90	No	6	16	14	4.3	114	59	4.3	0.6	1.2	2.83	Healthy	Healthy
947	75.778	1_Johor	SMK SEG HWA	29	Female	Malay	Degree	Married	No	0	1	Inadequate	4	5	3360		No	No	96	No	2	6	6	4.5	132	86	5.6	1.8	1.3	3.48	Healthy	Healthy
948	75.778	1_Johor	SMK SEG HWA	45	Female	Chinese	Degree	Married	Yes	1	0	Inadequate	6	8	1386	120	No	Yes	73	Abdominal obese	12	14	14	6.4	115	71	5.5	1.4	1.3	3.56	T2DM
949	75.778	1_Johor	SMK SEG HWA	36	Male	Chinese	Degree	Married	Yes	0	1	Inadequate	5	8	306	240	No	Yes	96	No	10	18	22	4.6	127	75	3.9	0.7	1.1	2.48	Healthy	Healthy
950	75.778	1_Johor	SMK SEG HWA	47	Female	Chinese	Degree	Single	Yes	1	1	Inadequate	8	9	810	90	No	Yes	73	Abdominal obese	8	10	18	5.1	116	65	6.1	1.9	1.8	3.44	Healthy	Healthy
951	75.778	1_Johor	SMK SEG HWA	40	Female	Malay	Degree	Married	No	0	0	Inadequate	8	7	120	120	No	No	84	No	6	12	10	4.6	111	67	5.4	2	1.4	3.09	Healthy	Healthy
952	75.778	1_Johor	SMK SEG HWA	32	Female	Malay	Degree	Married	Yes	0	0	Inadequate	5	5	0	180	No	No	69	Abdominal obese	8	4	12	5.2	112	73	4.3	0.6	1.8	2.23	Healthy	Healthy
953	75.778	1_Johor	SMK SEG HWA	48	Female	Chinese	Degree	Married	No	1	0	Inadequate	7	8	180	120	No	No	84	No	6	2	4	4.5	130	76	3.9	0.9	1.3	2.19	Healthy	Healthy
954	75.778	1_Johor	SMK SEG HWA	30	Female	Malay	Master and above	Married	Yes	1	0	Inadequate	7	8	480		No	No	60.3	Abdominal obese	12	4	4	5.5	110	68	6.5	0.6	2.3	3.93	Healthy	Healthy
955	75.778	1_Johor	SMK SEG HWA	29	Female	Malay	Degree	Single	No	0	0	Inadequate	6	6	607.5	120	No	No	83.5	No	2	8	2	5	123	68	4.1	1.1	1.4	2.2	Healthy	Healthy
956	75.778	1_Johor	SMK SEG HWA	31	Female	Malay	Degree	Married	No	2	1	Inadequate			960		No	No	68.5	Abdominal obese	8	12	6	4.9	107	67	3.8	0.4	1.2	2.42	Healthy	Healthy
957	75.778	1_Johor	SMK SEG HWA	42	Female	Chinese	Degree	Married	No	2			8	9	822	60	No	No	85	No	0	2	0	4.6	111	66	4.5	0.6	2.1	2.13	Healthy	Healthy
958	75.778	1_Johor	SMK SEG HWA	49	Male	Indian	Master and above	Married	No	1	2	Inadequate	8		720	780	Yes	No	104	No	28	28	28	4.9	145	78	4.2	1.8	0.9	2.48	Healthy	Healthy
959	75.778	1_Johor	SMK SEG HWA	33	Female	Chinese	Degree	Married	No	0	1	Inadequate	6	8	2613	180	No	Yes	82	No	0	2	10	5.2	116	68		0.8	1.1	1.64	Healthy	Healthy
960	75.778	1_Johor	SMK SEG HWA	51	Male	Malay	Degree	Married	Yes	0	0	Inadequate	4	4	0		Yes	No	92	No	0		0	4.7	135	87	5.9		1.1	2.89	Healthy	Healthy
961	75.778	1_Johor	SMK SEG HWA	33	Female	Malay	Degree	Divorced	Yes	1	0	Inadequate	8	9	353		No	No	64	Abdominal obese	4	4	6	4.4	100	70	6.1	0.9	1.6	4.09	Healthy	Healthy
962	75.778	1_Johor	SMK SEG HWA	46	Female	Indian	Degree	Single	Yes	2	2	Inadequate	5	8	450	600	No	No	93	No	4	8	14	5	138	93	5.6	1.1	1.4	3.7	Healthy	Healthy
963	75.778	1_Johor	SMK SEG HWA	26	Female	Malay	Degree	Single	Yes	0	1	Inadequate	5	6	2506.5	300	No	No	71	Abdominal obese	18	6	22	4.8	109	67	4.8	1.1	1.6	2.7	Healthy	Healthy
964	422.727	1_Johor	SMK DATO' IBRAHIM MAJID	38	Female	Malay	Degree	Married	Yes	0	2	Inadequate	4	6	591	120	No	No	65	Abdominal obese	16	22	22	5.5	98	67	6.1	1.5	1.6	3.82	Healthy	Healthy
965	422.727	1_Johor	SMK DATO' IBRAHIM MAJID	31	Female	Malay	Degree	Married	Yes	0	0	Inadequate	8	9	540	90	No	No	67	Abdominal obese	2	4	4	4.8	107	68	3.9	0.7	1.4	2.18	Healthy	Healthy
966	422.727	1_Johor	SMK DATO' IBRAHIM MAJID	47	Male	Malay	Degree	Married	No	0	1	Inadequate	5	6	720	4	Yes	No	92	No	20	20	20	4.9	129	82	5.2	0.9	1.2	3.59	Healthy	Healthy
967	422.727	1_Johor	SMK DATO' IBRAHIM MAJID	50	Female	Malay	Degree	Married	Yes	2	1	Inadequate	5	5	0		Yes	No	76	Abdominal obese	8	4	8	5.4	121	66	4.4	0.6	1.3	2.83	Healthy	Healthy
968	422.727	1_Johor	SMK DATO' IBRAHIM MAJID	42	Male	Malay	Degree	Married	Yes	0	0	Inadequate	7	7	13626	420		No	77	Abdominal obese	2	0	8	4.5	110	70	5.8	1.2	1.2	4.06	Healthy	Healthy
969	422.727	1_Johor	SMK DATO' IBRAHIM MAJID	44	Female	Malay	Diploma	Single	No	1			5	6	693		No	No	79	Abdominal obese	14	8	8	4.6	147	95	4.6	1.3	1	3.01	Healthy	Healthy
970	422.727	1_Johor	SMK DATO' IBRAHIM MAJID	52	Female	Malay	Degree	Married	No				6	6	480	60	No	No	73	Abdominal obese	4	0	2	5.4	114	65	6.3	1.5	1.3	4.32	Healthy	Healthy
971	422.727	1_Johor	SMK DATO' IBRAHIM MAJID	26	Male	Malay									0				76	Abdominal obese				4.6	125	73	4.8	2.2	1.2	2.6	Healthy	Healthy
972	422.727	1_Johor	SMK DATO' IBRAHIM MAJID	38	Female	Malay	Degree	Married	No	1	4	Inadequate	6	6	132		No	No	80	No	12	6	8	5.7	122	66	4.8	1	1.1	3.25	Healthy	Impaired fasting glucose
973	375.706	1_Johor	SMK PASIR PUTIH	51	Female	Malay	Degree	Married	No	1	1	Inadequate	6	7	4158	120		No	81	No	16	22	18	7.1	137	82	4.4	0.9	1.1	2.89	Undiagnosed T2DM
974	375.706	1_Johor	SMK PASIR PUTIH	36	Female	Malay	Master and above	Married	Yes	1	1	Inadequate	5	7	6000	120	No		81	No	2	8	4	4.3	122	71	4.8	0.7	1.7	2.78	Healthy	Healthy
975	375.706	1_Johor	SMK PASIR PUTIH	40	Female	Indian									0									4.9	93	61	5.3	0.6	1.6	3.43	Healthy	Healthy
976	375.706	1_Johor	SMK PASIR PUTIH	49	Female	Malay	Master and above	Married	Yes	3	3	Adequate	6	7	4386	120			74	Abdominal obese	2	2	2	4.6	132	85	5.5	1.2	1.4	3.56	Healthy	Healthy
977	375.706	1_Johor	SMK PASIR PUTIH	42	Female	Malay	Degree	Married	No	0			5	6	0	480	No	No	66	Abdominal obese	2	0	0	5	124		4	0.5	1.7	2.07	Healthy	Healthy
978	375.706	1_Johor	SMK PASIR PUTIH	45	Female	Malay									0				98	No				7.4	145	76	4.2	1.2	1.2	2.46	Undiagnosed T2DM
979	375.706	1_Johor	SMK PASIR PUTIH	38	Female	Malay									0				83	No				5.6	127	74	4.7	1.6	1	2.97	Healthy	Impaired fasting glucose
980	375.706	1_Johor	SMK PASIR PUTIH	26	Female	Malay	Degree	Single	No	0			5	5	99		No	No	61	Abdominal obese	0	8	4	4.3	102	63	5.5	0.5	2.1	3.17	Healthy	Healthy
981	375.706	1_Johor	SMK PASIR PUTIH	46	Female	Malay	Master and above	Married	Yes	0			5	5	800	20	No	No	81	No	8	16	16	5.4	117	76	4.8	1	1.4	2.95	Healthy	Healthy
982	375.706	1_Johor	SMK PASIR PUTIH	27	Female	Malay	Degree	Married		0	1	Inadequate	6	7	5370	60	No	No	99	No	2	6	12	4.9	134	86	4.6	1.4	1.2	2.76	Healthy	Healthy
983	375.706	1_Johor	SMK PASIR PUTIH	35	Female	Malay									0				66	Abdominal obese				4	104		4.6	0.8	1.4	2.84	Healthy	Healthy
984	375.706	1_Johor	SMK PASIR PUTIH	32	Female	Malay									0				72	Abdominal obese				4.8	101	61	5	0.8	1.2	3.44	Healthy	Healthy
985	375.706	1_Johor	SMK PASIR PUTIH	29	Female	Indian	Degree	Single	Yes	0	1	Inadequate	5	7	240	240	No	No	86	No	8	10	18	4.7	110	65	5.1	1	1	3.65	Healthy	Healthy
986	375.706	1_Johor	SMK PASIR PUTIH	46	Female	Malay	Degree	Married	No	0	0	Inadequate	5	7	10158	120	No	No	71	Abdominal obese	4	14	12	4.3	108	65	5.2	1.7	1.2	3.23	Healthy	Healthy
987	375.706	1_Johor	SMK PASIR PUTIH	40	Female	Malay									0				79	Abdominal obese				5	112	64	4.3	0.6	1.5	2.53	Healthy	Healthy
988	375.706	1_Johor	SMK PASIR PUTIH	46	Female	Malay	Degree	Married	Yes	1	1	Inadequate	7	8	120		No	No	92	No	20	18	28	5.9	139	89	5.4	1	1.7	3.25	Healthy	Impaired fasting glucose
989	375.706	1_Johor	SMK PASIR PUTIH	36	Female	Malay	Degree	Married	Yes	0	3	Inadequate	5	6	240		No	No	63	Abdominal obese	12	8	18	5	129	70	4.7	0.6	1.6	2.83	Healthy	Healthy
990	375.706	1_Johor	SMK PASIR PUTIH	31	Female	Malay	Degree	Married	Yes	0	1	Inadequate	6	7	240		No	No	77	Abdominal obese	10	8	16	5.3	122	69	6.1	0.7	1.9	3.88	Healthy	Healthy
991	375.706	1_Johor	SMK PASIR PUTIH	30	Female	Malay	Degree	Married	Yes	1	1	Inadequate	5	7	3094.5	330	No	No	85	No	16	16	16	5.3	119	76	6.7	1.7	1.4	4.53	Healthy	Healthy
992	375.706	1_Johor	SMK PASIR PUTIH	29	Female	Malay	Degree	Single	No	0	1	Inadequate	7	7	405	40	No	No	64	Abdominal obese	8	2	12	4.5	114	71	5.1	0.9	1.6	3.09	Healthy	Healthy
993	375.706	1_Johor	SMK PASIR PUTIH	26	Female	Malay	Degree	Married	No	1			4	5	4638	60		No	72	Abdominal obese	12	16	18	5.3	127	67	5.2	1.1	1.4	3.3	Healthy	Healthy
994	375.706	1_Johor	SMK PASIR PUTIH	32	Female	Malay	Degree	Married	Yes	0	0	Inadequate	6	6	0	240	No	No	87	No	4	18	20	5.4	120	82	5.7	1	1.2	4.05	Healthy	Healthy
995	375.706	1_Johor	SMK PASIR PUTIH	29	Female	Malay	Master and above	Single	Yes	2	2	Inadequate	7	6	0	300	No	No	64	Abdominal obese	4	6	14	4.7	105	70	3.9	0.7	1.1	2.48	Healthy	Healthy
996	138.596	1_Johor	SMK IMPIAN EMAS	45	Male	Malay	Degree	Married			4		6	6	1165		No	No	79	Abdominal obese		2	0			102	6.3	1.4	1.5	4.16	T2DM
997	138.596	1_Johor	SMK IMPIAN EMAS	36	Male	Chinese	Degree	Married	No	0			7	8	405	60	No	No	63	Abdominal obese	4	2	10	4.5	121	78	5.2	0.7	1.9	2.98	Healthy	Healthy
998	138.596	1_Johor	SMK IMPIAN EMAS	48	Male	Malay	Degree	Married	Yes	1	1	Inadequate	4	6	727.5	120	No	No	108	No	4	6	10	4.9	127	74	5.2	0.5	1.7	3.27	Healthy	Healthy
999	138.596	1_Johor	SMK IMPIAN EMAS	34	Male	Chinese	Degree	Married	Yes	0	2	Inadequate	7	8	1377	120	No	No	96	No	8	0	6	4.7	127	78	5	1.7	1.3	2.93	Healthy	Healthy
1000	138.596	1_Johor	SMK IMPIAN EMAS	55	Male	Malay	Degree	Married		0	5	Inadequate	8	8	720	180	No	No	76	Abdominal obese	0	2	4	5.6	126	62	8.3	1.2	1.8	5.96	Healthy	Impaired fasting glucose
1001	138.596	1_Johor	SMK IMPIAN EMAS	42	Male	Malay	Degree	Married	No	1	0	Inadequate	6	6	2217	120	No	No	97	No	2	4	8	6.2	105	61	5.6	0.9	1.3	3.89	Undiagnosed T2DM
1002	138.596	1_Johor	SMK IMPIAN EMAS	31	Male	Malay	Degree	Single	No	1	1	Inadequate	6	6	165		No	No	94	No	14	14	14	4.7	125	69	4.8	1.2	1.1	3.16	Healthy	Healthy
1003	138.596	1_Johor	SMK IMPIAN EMAS	39	Male	Malay	Degree	Married	No		1		5	6	975	120	No	No	83	Abdominal obese	2	6	6	4.9	127	78	5.7	1.1	1.3	3.9	Healthy	Healthy
1004	138.596	1_Johor	SMK IMPIAN EMAS	41	Male	Indian	Degree	Married	Yes	1	2	Inadequate	8	9	0		No	No	80	Abdominal obese	2	4	4	5.7	122	73	4.9	1	1.1	3.35	Healthy	Impaired fasting glucose
1005	138.596	1_Johor	SMK IMPIAN EMAS	30	Male	Malay	Degree	Married	Yes	1	1	Inadequate	8	9	1782	30	No	No	88	Abdominal obese	8	8	14	4.8	124	76	4.1	0.7	1.7	2.08	Healthy	Healthy
1006	138.596	1_Johor	SMK IMPIAN EMAS	34	Male	Indian	Degree	Married	No	1	1	Inadequate	6	7	3186	180	No	No	89	Abdominal obese	14	14	14	5.6	117	76	6.2	1.2	0.9	4.76	Healthy	Impaired fasting glucose
1007	138.596	1_Johor	SMK IMPIAN EMAS	53	Male	Chinese	Degree	Married	Yes	0	1	Inadequate	6	7	2700	300	No	No	75	Abdominal obese	14	14	14	5.3	113	63	6.1	1.7	1.5	3.83	Healthy	Healthy
1008	138.596	1_Johor	SMK IMPIAN EMAS	34	Male	Malay	Degree	Married	Yes	1	1	Inadequate	8	7	0		No	No	74	Abdominal obese	14	14	14	5.3	115	75	4.3	0.7	2	1.98	Healthy	Healthy
1009	138.596	1_Johor	SMK IMPIAN EMAS	29	Male	Malay	Degree	Married	Yes	0	1	Inadequate	7	8	1293	60	No	No	85	Abdominal obese	2	4	4	4.1	116	74	7	1.7	1.6	4.63	Healthy	Healthy
1010	138.596	1_Johor	SMK IMPIAN EMAS	38	Male	Malay	Degree	Married	Yes	0	1	Inadequate	5	5	99		No	No	84	Abdominal obese	0	2	2	4.9	106	72	7.5	2.4	1.1	5.31	Healthy	Healthy
1011	138.596	1_Johor	SMK IMPIAN EMAS	29	Male	Malay	Degree	Married	No	1	1	Inadequate	7	8	3210	180	Yes	No	97	No	2	10	10	4.8	120	73	4.3	0.6	1.4	2.63	Healthy	Healthy
1012	138.596	1_Johor	SMK IMPIAN EMAS	47	Male	Chinese	Degree	Married	Yes	1	1	Inadequate	6	7	99	720	No	No	81	Abdominal obese	8	8	10	4.6	112	74	4.1	1.2	1.2	2.36	Healthy	Healthy
1013	138.596	1_Johor	SMK IMPIAN EMAS	47	Female	Malay				0	7	Inadequate	6	6	0		No	No	74	Abdominal obese	0	0	2	15.1	146	80	6.3	0.9	2	3.89	Undiagnosed T2DM
1014	138.596	1_Johor	SMK IMPIAN EMAS	33	Male	Malay	Degree	Married	Yes	0	1	Inadequate	6	8	480		No	No	82	Abdominal obese	6	6	12	4.8	113	73	4.2	0.5	1.6	2.37	Healthy	Healthy
1015	138.596	1_Johor	SMK IMPIAN EMAS	33	Male	Malay	Degree	Married	No	1			6	7	1200		No	No	72	Abdominal obese	8	6	24	4.8	118	68	5.5	1.1	1.4	3.6	Healthy	Healthy
1016	138.596	1_Johor	SMK IMPIAN EMAS	32	Female	Malay	Degree			0	1	Inadequate	4	5	3172	180	No	No	92	No	14	12	12	4.6	96		4	0.6	1.3	2.43	Healthy	Healthy
1017	138.596	1_Johor	SMK IMPIAN EMAS	32	Male	Malay	Secondary	Married		1	1	Inadequate	4	6	0	120		No	80	Abdominal obese	4	10	10	4.9	113	70	4.7	0.6	1.1	3.33	Healthy	Healthy
1018	138.596	1_Johor	SMK IMPIAN EMAS	50	Male	Malay	Degree	Married	No	0	1	Inadequate			1230	300	No	No	78	Abdominal obese				4.8	116	66	6.2	0.9	1.7	4.09	Healthy	Healthy
1019	138.596	1_Johor	SMK IMPIAN EMAS	36	Male	Malay	Degree	Married	Yes	0	1	Inadequate	8	7	49.5		No	No	76	Abdominal obese	8	26	26	4.5	107		6.9	0.7		3.88	Healthy	Healthy
1020	138.596	1_Johor	SMK IMPIAN EMAS	34	Male	Malay	Degree	Married	No	0	1	Inadequate	7	7	2786		No	No	84	Abdominal obese	22	6	22	4.5	122	64	5	0.4	1.7	3.12	Healthy	Healthy
1021	138.596	1_Johor	SMK IMPIAN EMAS	29	Male	Malay	Degree	Married	Yes	1	2	Inadequate	5	7	4053	480	No	No	71	Abdominal obese	4	8	12	4.8	117	74	4.5	0.7	1.7	2.48	Healthy	Healthy
1022	138.596	1_Johor	SMK IMPIAN EMAS	40	Male	Malay	Degree	Married	Yes	1	1	Inadequate	5	6	0		No	No	90	No	14	14	14	4.4	117	82	5.8	0.7	1.6	3.88	Healthy	Healthy
1023	138.596	1_Johor	SMK IMPIAN EMAS	41	Female	Malay									0				88	No				4.8	132	82	5.2	0.9	1.5	3.29	Healthy	Healthy
1024	138.596	1_Johor	SMK IMPIAN EMAS	35	Male	Malay	Degree	Married	Yes	1	1	Inadequate	7	7	3732	480	No	No	80	Abdominal obese	2	2	2	4.5	119	81	5	0.9	1.6	2.99	Healthy	Healthy
1025	138.596	1_Johor	SMK IMPIAN EMAS	47	Male	Malay	Degree	Married	Yes	0	1	Inadequate	5	5	1539	60	No	No	91	No	6	6	6	5.3	142	82	4.9	0.7	2	2.58	Healthy	Healthy
1026	138.596	1_Johor	SMK IMPIAN EMAS	30	Male	Chinese	Degree	Married	Yes	0	1	Inadequate	6	8	240	300	No	No	71	Abdominal obese	2	8	14	4.7	104	72	4.4	1	1.7	2.25	Healthy	Healthy
1027	138.596	1_Johor	SMK IMPIAN EMAS	27	Male	Malay	Degree	Married	Yes	0	7	Inadequate	6	8	687.5	120	No	No	91	No	0	12	6	4.3	95		4.6	0.6	1.7	2.63	Healthy	Healthy
1028	138.596	1_Johor	SMK IMPIAN EMAS	33	Male	Malay	Degree	Married	No	0	2	Inadequate	8	7	480		No	No	74	Abdominal obese	2	8		5.3	119	93	6.1	1	1.4	4.25	Healthy	Healthy
1029	138.596	1_Johor	SMK IMPIAN EMAS	40	Male	Malay	Degree	Married	Yes	0	7	Inadequate	7	6	219	30	No	No	76	Abdominal obese	14	14	14	4.4	126	81	5.8	0.6	1.8	3.73	Healthy	Healthy
1030	138.596	1_Johor	SMK IMPIAN EMAS	37	Male	Indian	Degree	Married	No	0	2	Inadequate	6	8	1087.5	120	No	No	80	Abdominal obese	4	10	12	5.4	93	60	4.9	1.1	1.3	3.1	Healthy	Healthy
1031	138.596	1_Johor	SMK IMPIAN EMAS	39	Male	Malay	Diploma	Married	Yes	1	1	Inadequate	5	6	960		No	No	106	No	8	8	10	5.2	160	91	5.2	1	1.5	3.25	Healthy	Healthy
1032	138.596	1_Johor	SMK IMPIAN EMAS	41	Male	Malay	Degree	Married	Yes	1	1	Inadequate	7	6	504	60	Yes	No	93	No	0	2	8	4.6	130	79	4.2	0.7	0.9	2.98	Healthy	Healthy
1033	138.596	1_Johor	SMK IMPIAN EMAS	28	Male	Indian	Degree	Widowed	No	0	2	Inadequate			2964	240	No	No	86	Abdominal obese	2	14	10	4.7	116	75	4.8	0.8	1.3	3.14	Healthy	Healthy
1034	138.596	1_Johor	SMK IMPIAN EMAS	57	Male	Malay	Degree	Married	No	1	1	Inadequate			5902	140	No	No	87	Abdominal obese	0	4	2	4.8	96	59	4.3	0.7	1.2	2.78	Healthy	Healthy
1035	138.596	1_Johor	SMK IMPIAN EMAS	39	Male	Malay	Degree	Married	Yes	1	2	Inadequate	7	7	1302	60		No	84	Abdominal obese	8	20	22	5.2	107	69	6.7	1.1	1.2	5	Healthy	Healthy
1036	138.596	1_Johor	SMK IMPIAN EMAS	46	Male	Malay	Master and above	Married	Yes						0		No	No	85	Abdominal obese	0	0	0	4.8	122	73	5.8	1	1.5	3.85	Healthy	Healthy
1037	138.596	1_Johor	SMK IMPIAN EMAS	45	Male	Malay	Degree	Married	No	0	1	Inadequate	5	6	2586	120		No	90	No				5.4	121	80	5.9	1.1	1.3	4.1	Healthy	Healthy
1038	138.596	1_Johor	SMK IMPIAN EMAS	32	Male	Malay	Master and above	Single	Yes	0	0	Inadequate	6	5	0	90	No	No	72	Abdominal obese	16	10	14	5.1	94		5.6	0.7	1.7	3.58	Healthy	Healthy
1039	138.596	1_Johor	SMK IMPIAN EMAS	39	Male	Malay	Master and above	Married	No	1	2	Inadequate	7	4	2970	120	No	No	79	Abdominal obese	2	2	0	4.7	100	59	6.4	0.8	2	4.04	Healthy	Healthy
1040	138.596	1_Johor	SMK IMPIAN EMAS	33	Male	Malay	Degree	Married	No	1	0	Inadequate	6	7	240	180	No	No	69	Abdominal obese	2	6	0	4.7	101	63	5.4	0.6	1.6	3.53	Healthy	Healthy
1041	138.596	1_Johor	SMK IMPIAN EMAS	31	Male	Malay	Degree	Married	Yes	0	7	Inadequate	7	7	346.5		No	No	79	Abdominal obese	4	6	14	4.3	109	72	5.8	1.1	1.4	3.9	Healthy	Healthy
1042	138.596	1_Johor	SMK IMPIAN EMAS	37	Male	Indian	Degree	Married	No	2	2	Inadequate	8	8	279	120	No	No	81	Abdominal obese	0	0	2	4.7	91		3.9	1.2	0.8	2.56	Healthy	Healthy
1043	138.596	1_Johor	SMK IMPIAN EMAS	49	Male	Malay									0				98	No				4.7	146	96	3.8	0.9	1	2.39	Healthy	Healthy
1044	138.596	1_Johor	SMK IMPIAN EMAS	37	Male	Malay	Degree	Married	Yes	0	1	Inadequate	6	8	6216	240	Yes	No	83	Abdominal obese	8	8	14	4.4	125	67	6.3	1.5	1.2	4.42	Healthy	Healthy
1045	138.596	1_Johor	SMK IMPIAN EMAS	27	Male	Malay	Degree	Single	No	0	1	Inadequate	6	7	1150	780	No	No	71	Abdominal obese	6	10	10	4.6	103	63	4.6	0.5	1.6	2.77	Healthy	Healthy
1046	138.596	1_Johor	SMK IMPIAN EMAS	27	Male	Malay	Degree	Married	Yes	1	1	Inadequate	7	8	3759		No	No	72	Abdominal obese	10	8	10	4.6	121	69	6.1	1.1	1.2	4.4	Healthy	Healthy
1047	181.169	1_Johor	SMK SERI INTAN	28	Male	Malay	Degree	Married	Yes	1	1	Inadequate	4	6	0	120	No	No	81	Abdominal obese	0	6	4	4.6	116	65	4.3	0.7	1.14	2.82	Healthy	Healthy
1048	181.169	1_Johor	SMK SERI INTAN	42	Male	Malay	Degree	Married		5	2	Inadequate	7	8	6318	420	No	No	94	No	4	10	6	6.3	146	88	6.3	1.5	1.3	4.36	Undiagnosed T2DM
1049	181.169	1_Johor	SMK SERI INTAN	41	Male	Malay	Degree	Married	Yes	2	3	Adequate	6	7	0		No		79.5	Abdominal obese	10	14	16	5.5	131	78	5.4	1.2	1.33	3.48	Healthy	Healthy
1050	181.169	1_Johor	SMK SERI INTAN	54	Male	Malay	Degree	Married	No	2	2	Inadequate	5	6	960		Yes	No	115	No	0	0	2	7.5	145	85	6.2		0.89	3.75	Undiagnosed T2DM
1051	181.169	1_Johor	SMK SERI INTAN	48	Male	Malay	Degree	Married	Yes	2			7	7	480	120	No	No	79	Abdominal obese	0	10	4	4.9	130	80	3.8	1.8	1.12	1.88	Healthy	Healthy
1052	181.169	1_Johor	SMK SERI INTAN	32	Male	Malay	Degree	Married	Yes	2	1	Inadequate	4	5	0		No	No	104	No	2	2	10	4.7	134	84	5.9		1.07		Healthy	Healthy
1053	181.169	1_Johor	SMK SERI INTAN	43	Male	Malay	Degree	Married	No	1	1	Inadequate	6	7	8613	120	Yes	No	84	Abdominal obese	2	0	2	7.1	119	69	5.4	1	1.12	3.84	Undiagnosed T2DM
1054	181.169	1_Johor	SMK SERI INTAN	33	Male	Malay	Degree	Married	Yes	0	0	Inadequate	7	7	1440	120		No	89	Abdominal obese	6	6	12	5.4	125	68	4.3	1	1.31	2.48	Healthy	Healthy
1055	181.169	1_Johor	SMK SERI INTAN	54	Male	Malay	Degree	Married	No	1	0	Inadequate	6	7	2160	60		No	70	Abdominal obese	16	18	22	4.5	143	79	7.5	1		4.49	Healthy	Healthy
1056	181.169	1_Johor	SMK SERI INTAN	27	Male	Malay	Degree	Married	No	2	4	Adequate	7	8	1575	30	No	No	75	Abdominal obese	0	2	0	4.8	117	64	5.1	1.2	1.5	3.07	Healthy	Healthy
1057	181.169	1_Johor	SMK SERI INTAN	42	Male	Malay	Degree	Married	Yes	1	1	Inadequate	4	6	4170	240	No	No	96	No	10	2	6	4.7	123	85	4.8	1.5	1.24	2.84	Healthy	Healthy
1058	181.169	1_Johor	SMK SERI INTAN	48	Male	Malay	Degree	Married	No				4	6	810	20	No	No	96	No	14	14	14	4.4	138	83	4.6	1.2	1.26	2.79	Healthy	Healthy
1059	181.169	1_Johor	SMK SERI INTAN	26	Male	Malay	Degree	Married	Yes	0	1	Inadequate	7	8	813	180	No	No	71	Abdominal obese	0	4	4	5	104	67	5.5	1.4	1.69	3.2	Healthy	Healthy
1060	181.169	1_Johor	SMK SERI INTAN	38	Male	Malay	Degree	Married	Yes	2	1	Inadequate	5	6	9438	180	No	No	92	No	4	16	10	13.8	116	76	3.9	1.8	0.93	2.13	Undiagnosed T2DM
1061	181.169	1_Johor	SMK SERI INTAN	42	Male	Malay	Degree	Married		1	2	Inadequate	6	6	7866	90	No	No	68	Abdominal obese		8	16	4.6	117	67	5.2	0.7	1.74	3.19	Healthy	Healthy
1062	181.169	1_Johor	SMK SERI INTAN	49	Male	Malay	Degree	Married		0	4	Inadequate	5	6	4638	300	No	No	73	Abdominal obese	4	0	6	4.3	134	78	5.6	0.7	1.63	3.61	Healthy	Healthy
1063	181.169	1_Johor	SMK SERI INTAN	45	Male	Malay	Degree	Married	Yes	0	1	Inadequate	6	6	1200	120	Yes	No	88	Abdominal obese	2	8	10	5.2	137	93	4.6	2.4	0.92	2.59	Healthy	Healthy
1064	181.169	1_Johor	SMK SERI INTAN	30	Male	Malay	Degree	Single	Yes	0	0	Inadequate	5		1800	30		No			0	0	6	4.7	133	75	7.8	2	1.43	5.46	Healthy	Healthy
1065	181.169	1_Johor	SMK SERI INTAN	43	Male	Malay	Degree	Married	Yes	0	0	Inadequate	5	6	2340	120	No	No	80	Abdominal obese	14	18	14	5.7	142	83	7.4	1.9	1.7	4.79	Healthy	Impaired fasting glucose
1066	181.169	1_Johor	SMK SERI INTAN	45	Male	Indian	Degree	Married	No	0	1	Inadequate	6	7	1059	40	No	No	105	No	6	6	10	5.1	111	68	3.8	1.2	0.96	2.25	Healthy	Healthy
1067	181.169	1_Johor	SMK SERI INTAN	35	Male	Malay		Married	Yes	0	1	Inadequate		9	4170	600	No	No	84	Abdominal obese	4	0	4	4.3	103	67	3.9	0.7	1.07	2.48	Healthy	Healthy
1068	196.344	1_Johor	SMK (P) SULTAN IBRAHIM	52	Female	Malay	Master and above	Married	Yes	1	1	Inadequate	5	5	2826			No	101	No	4	12	10	5.9	136	91	5.7	2.6	1.2	3.32	Healthy	Impaired fasting glucose
1069	196.344	1_Johor	SMK (P) SULTAN IBRAHIM	36	Female	Malay	Degree	Married	No	1	2	Inadequate	4	5	9918	120	No	No	94	No	0	2	2	4.8	124	86	5.2	1.5	1.01	3.51	Healthy	Healthy
1070	196.344	1_Johor	SMK (P) SULTAN IBRAHIM	26	Female	Malay	Degree	Single	Yes	1	1	Inadequate	5	8	862	180	No	No	66	Abdominal obese	18	22	24	5.1	119	78		0.7	1.25	1.93	Healthy	Healthy
1071	196.344	1_Johor	SMK (P) SULTAN IBRAHIM	56	Female	Malay	Diploma	Married	No	1	1	Inadequate	6	7	2316	120	No	No	62.5	Abdominal obese	0	0	0	5.2	100	68	5.6	1	1.33	3.82	Healthy	Healthy
1072	196.344	1_Johor	SMK (P) SULTAN IBRAHIM	44	Female	Chinese	Degree	Married	No						0				74	Abdominal obese				5.3	110	68	4.2	0.9	1.47	2.32	Healthy	Healthy
1073	196.344	1_Johor	SMK (P) SULTAN IBRAHIM	29	Female	Malay	Degree	Married	Yes	0	1	Inadequate	6	8	3786	240	No	No	88.5	No	6	12	14	6.5	137	85	6.2	2.2	1.54	3.66	Undiagnosed T2DM
1074	196.344	1_Johor	SMK (P) SULTAN IBRAHIM	27	Female	Malay	Degree	Married	No	2	1	Inadequate	6	6	2034		No	No	75	Abdominal obese	2	6	10	4.8	111	78	5.3	0.7	1.67	3.31	Healthy	Healthy
1075	196.344	1_Johor	SMK (P) SULTAN IBRAHIM	33	Female	Malay	Secondary	Married	No	1	2	Inadequate	7	7	1398	60	No	No	79	Abdominal obese	0	8	10	4.8	99	68	3.9	0.8	1.18	2.36	Healthy	Healthy
1076	196.344	1_Johor	SMK (P) SULTAN IBRAHIM	34	Female	Malay	Degree	Married	No	0			6	8	0		No	No	70	Abdominal obese	18	10	14	4.6	102	72	4.9	0.8	1.43	3.11	Healthy	Healthy
1077	196.344	1_Johor	SMK (P) SULTAN IBRAHIM	27	Female	Malay	Master and above	Married	Yes	1	2	Inadequate	7	7	2133	240	No	No	75	Abdominal obese	2	0	8	5.2	125	84	5	0.8	1.45	3.19	Healthy	Healthy
1078	196.344	1_Johor	SMK (P) SULTAN IBRAHIM	44	Female	Malay	Degree	Married	Yes	0	1	Inadequate	4	6	2346	150	No	No	93	No	18	16	14	4.6	121	70	4.6	0.8	1.28	2.96	Healthy	Healthy
1079	196.344	1_Johor	SMK (P) SULTAN IBRAHIM	35	Female	Malay	Degree	Married	Yes	1	2	Inadequate	6	7	3066		No	No	84	No	2	0	8	4.8	116	66	4.5	0.5	1.29	2.98	Healthy	Healthy
1080	196.344	1_Johor	SMK (P) SULTAN IBRAHIM	47	Female	Malay	Degree	Married		1	7	Inadequate	6	6	2826	60	No	No	94	No	0	2	4	6.2		99	4.7	1.1	1.08	3.12	Undiagnosed T2DM
1081	196.344	1_Johor	SMK (P) SULTAN IBRAHIM	45	Female	Malay	Degree	Married	Yes	1	2	Inadequate	4	7	1365	120	No	No	85	No	0	8	4	5	130	86	6.2	1.7	1.27	4.16	Healthy	Healthy
1082	196.344	1_Johor	SMK (P) SULTAN IBRAHIM	29	Female	Malay	Secondary	Married	Yes	1	5	Inadequate	8	8	0		No	No	87	No	2	8	8	5.2	136	94	4.9	1.2	1.45	2.91	Healthy	Healthy
1083	196.344	1_Johor	SMK (P) SULTAN IBRAHIM	25	Female	Malay	Degree	Single	No	1	1	Inadequate	6	8	1554	3	No	No	75.5	Abdominal obese	8	6	10	4.8	123	75	5.7	0.5	1.56	3.91	Healthy	Healthy
1084	196.344	1_Johor	SMK (P) SULTAN IBRAHIM	51	Male	Malay	Degree	Married	Yes	1	1	Inadequate	6	6	2730	150	Yes	No	99	No	16	14	22	7.1	129	86	5.8	1.6	1.35	3.72	T2DM
1085	196.344	1_Johor	SMK (P) SULTAN IBRAHIM	49	Female	Other races	Master and above	Single	Yes				5	6	1878	300	No	No	71.5	Abdominal obese	14	14	14	5	117	92	6.1	1.6	1.4	3.97	Healthy	Healthy
1086	196.344	1_Johor	SMK (P) SULTAN IBRAHIM	43	Female	Malay	Secondary	Married	Yes	0	1	Inadequate			0		No	No	97	No	12	12	14	6.5	131	90	6.3	1.7	1.32	4.21	Undiagnosed T2DM
1087	196.344	1_Johor	SMK (P) SULTAN IBRAHIM	31	Female	Malay	Diploma	Married	No	0	3	Inadequate	6	6	1746	300	No	No	74	Abdominal obese	0	0	0	5.1	103	71	5	0.6	1.62	3.11	Healthy	Healthy
1088	196.344	1_Johor	SMK (P) SULTAN IBRAHIM	37	Female	Malay	Master and above	Single	No	1	1	Inadequate	8	8	0		No	No	98	No	0	10	10	5.3	120	84	6.2	1.7	1.12	4.31	Healthy	Healthy
1089	196.344	1_Johor	SMK (P) SULTAN IBRAHIM	31	Female	Malay	Degree	Married	No	0	1	Inadequate	6	8	1200			No	67	Abdominal obese	28	26	28	4.1	114	79	4.8	1	1.22	3.13	Healthy	Healthy
1090	196.344	1_Johor	SMK (P) SULTAN IBRAHIM	45	Male	Chinese	Master and above	Married	Yes	0			5	7	2640		No	Yes	99	No	8	6	10	5.6	118	76	4.9	1.1	1.07	3.33	Healthy	Impaired fasting glucose
1091	196.344	1_Johor	SMK (P) SULTAN IBRAHIM	34	Female	Malay	Secondary	Married	Yes	1	1	Inadequate	6	8	666		No	No	70.5	Abdominal obese	0	2	2	4.7	103	63	5	0.8	1.32	3.32	Healthy	Healthy
1092	196.344	1_Johor	SMK (P) SULTAN IBRAHIM	33	Female	Chinese	Degree	Married	No	0	1	Inadequate	6	9	2082		No	No	64	Abdominal obese	8	4	10	5.2	119	75	5.1	0.7	1.55	3.23	Healthy	Healthy
1093	196.344	1_Johor	SMK (P) SULTAN IBRAHIM	31	Female	Malay	Master and above	Single	Yes	0	1	Inadequate	7	8	3564	180	No	No	72.5	Abdominal obese	10	8	12	4.6	103		3.8	1.9	1.2	1.74	Healthy	Healthy
1094	196.344	1_Johor	SMK (P) SULTAN IBRAHIM	53	Female	Malay	Degree	Single	No	0	2	Inadequate	5	6	3210		No	No	72.5	Abdominal obese	2	8	8	5.1	120	79	5.4	0.6	1.88	3.25	Healthy	Healthy
1095	196.344	1_Johor	SMK (P) SULTAN IBRAHIM	43	Female	Malay	Degree	Married	No	0	7	Inadequate	6	7	720	180	No	No	77.5	Abdominal obese	8	22	26	4.6	107	72	4.6	0.8	1.46	2.78	Healthy	Healthy
1096	196.344	1_Johor	SMK (P) SULTAN IBRAHIM	47	Female	Chinese	Degree	Single	Yes	1	1	Inadequate	6	8	540		No	No	85	No	0	0	8	5.4	121	75	6.1	1.2	1.36	4.2	Healthy	Healthy
1097	196.344	1_Johor	SMK (P) SULTAN IBRAHIM	42	Female	Indian	Master and above	Married	No	1	1	Inadequate	6	7	2106	120	No	No	84	No	4	4	12	5	118		4.9	1.4	1.08	3.18	Healthy	Healthy
1098	196.344	1_Johor	SMK (P) SULTAN IBRAHIM	28	Female	Malay	Degree	Married	No	1			7	6	487.5	360		No	69	Abdominal obese	14	18	18	4.4	122	75	6.3	2.7	1.31	3.76	Healthy	Healthy
1099	196.344	1_Johor	SMK (P) SULTAN IBRAHIM	31	Female	Malay	Degree	Married	Yes	1	2	Inadequate	5	7	0		No	No	82.5	No	26	16	20	4.7	121	72	4.6	0.7	1.93	2.35	Healthy	Healthy
1100	89.099	1_Johor	SMK PARIT BETAK	50	Male	Malay	Degree	Married	No	1	1	Inadequate	5	5	720	60	Yes	No	94	No	16	18	16	5.2	138	85	6.7	2.3	1.2	4.46	Healthy	Healthy
1101	89.099	1_Johor	SMK PARIT BETAK	29	Female	Malay	Degree	Married	Yes	0	0	Inadequate	7	8	1518	210	No	No	70	Abdominal obese	8	10	8	4.6	92	60	4	0.4	2	1.82	Healthy	Healthy
1102	89.099	1_Johor	SMK PARIT BETAK	35	Female	Malay	Degree	Married	No	1			6	7	0		No	No	79	Abdominal obese	8	10	8	5.2	118	78	5.3	0.5	2.1	2.97	Healthy	Healthy
1103	89.099	1_Johor	SMK PARIT BETAK	34	Female	Malay	Degree	Married	No	0	1	Inadequate	5	6	628.5	60	No	No	62	Abdominal obese	0	2	6	5	119	74	3.6	0.6	1.4	1.93	Healthy	Healthy
1104	89.099	1_Johor	SMK PARIT BETAK	39	Female	Malay	Degree	Married	No				6	7	960	240	No	No	74	Abdominal obese	6	14	10	5.1	107	66	5.5	1.3	1.6	3.31	Healthy	Healthy
1105	89.099	1_Johor	SMK PARIT BETAK	58	Female	Malay	Degree	Married	No	1	7	Inadequate	6	6	3337.5	487	No	No	112	No				4.6	139	71	5.8	1.7	1.2	3.83	Healthy	Healthy
1106	89.099	1_Johor	SMK PARIT BETAK	48	Female	Malay	Degree	Married	No	1	1	Inadequate	5	5	4158		No	No	71	Abdominal obese	0	0	0	5.3	124	71	4.6	0.9	1.8	2.39	Healthy	Healthy
1107	89.099	1_Johor	SMK PARIT BETAK	40	Female	Malay	Degree	Married	No	2	2	Inadequate	5	6	2973		No	No	70	Abdominal obese	2	4	8	4.7	107	71	4.6	0.7	1.5	2.78	Healthy	Healthy
1108	89.099	1_Johor	SMK PARIT BETAK	28	Female	Malay	Degree	Married	Yes	0	0	Inadequate	5	6	3690	180	No	No	72	Abdominal obese	8	12	14	5.1	122	78	5.5	0.6	2.2	3.03	Healthy	Healthy
1109	89.099	1_Johor	SMK PARIT BETAK	34	Female	Malay	Degree	Married	No	1	1	Inadequate	6	7	198		No	No	101	No	12	8	12	7.4	145	92	6.2	1.9	1.2	4.14	Undiagnosed T2DM
1110	89.099	1_Johor	SMK PARIT BETAK	49	Female	Malay	Degree	Married	Yes	1	1	Inadequate	5	5	2400		No	No	79	Abdominal obese	0	0	0	6.7	156	90	6.3	1.2	1.6	4.16	Undiagnosed T2DM
1111	89.099	1_Johor	SMK PARIT BETAK	48	Female	Malay	Degree	Married	No	0	2	Inadequate	5	5	198		No	No	84	No	0	0	4	6.4	158	99	4.7	0.6	1.2	3.23	Undiagnosed T2DM
1112	89.099	1_Johor	SMK PARIT BETAK	34	Female	Malay	Degree	Married	Yes	0	1	Inadequate	6	7	1920		No	No	99	No	12	22	20	9.1	123	83	5.6	1.2	1.2	3.86	T2DM
1113	89.099	1_Johor	SMK PARIT BETAK	46	Female	Malay	Degree	Married	Yes	3	2	Inadequate	5	6	960		No	No	91	No	6	12	10	7.2	127	78	6.2	1.6	1.5	3.97	T2DM
1114	89.099	1_Johor	SMK PARIT BETAK	25	Female	Malay	Master and above	Single	Yes	0	1	Inadequate	7	7	0		No	No			6	8	6	4.8	111	74	6	0.7	2	3.68	Healthy	Healthy
1115	158.383	1_Johor	SMK LINGGIU	30	Female	Malay									0				75	Abdominal obese				4.5	96		5	0.8	1.59	3.1	Healthy	Healthy
1116	158.383	1_Johor	SMK LINGGIU	45	Female	Malay		Married	No	1			8	6	480		No	No	63.5	Abdominal obese	6	16	14	4.7	123	76	5.6	1		2.63	Healthy	Healthy
1117	158.383	1_Johor	SMK LINGGIU	41	Female	Malay	Degree	Married	No	0	2	Inadequate	6	7	466.5	120	No	No	77	Abdominal obese	2	6	6	4.9	161	95	4.2	0.8	1.6	2.22	Healthy	Healthy
1118	158.383	1_Johor	SMK LINGGIU	31	Female	Malay	Secondary	Single	No	0	1	Inadequate	7	6	537		No	No	98	No	10	10	10	5.9	155	79	3.9	0.7	1.81	1.75	Healthy	Impaired fasting glucose
1119	158.383	1_Johor	SMK LINGGIU	38	Female	Malay	Degree	Married	No	1	2	Inadequate	6	7	231	840	No	No	88	No	6	6	6	4.7	122	67	5.8	0.9	1.43	3.93	Healthy	Healthy
1120	158.383	1_Johor	SMK LINGGIU	52	Male	Malay	Degree	Married	Yes	0	1	Inadequate	6	7	360		No	No	101	No	4	16	0	6	147	81	4.1	1.2	1.09	2.45	T2DM
1121	158.383	1_Johor	SMK LINGGIU	33	Female	Malay									0				79	Abdominal obese				4.7	136	91	4.4	0.8	1.52	2.54	Healthy	Healthy
1122	158.383	1_Johor	SMK LINGGIU	40	Female	Malay	Degree	Married	No	0	2	Inadequate	6	7	0		No	No	71	Abdominal obese	10	10	10	5	103	64	6.1	0.7	1.86	3.97	Healthy	Healthy
1123	158.383	1_Johor	SMK LINGGIU	31	Female	Malay		Married	No	0	1	Inadequate	5	5	1200	60	No	No	104	No	0	0	0	4.9	144	90	5.6	2	1.09	3.6	Healthy	Healthy
1124	158.383	1_Johor	SMK LINGGIU	25	Male	Malay	Degree	Single	No				7	7	2217		No	No	80	Abdominal obese	20	12	16	4.5	144	72	4.5	0.8	1.22	2.91	Healthy	Healthy
1130	864.123	1_Johor	SMK PERMAS JAYA 3	31	Female	Malay									0				67	Abdominal obese				4.5	117	69	4.2	0.7	1.4	2.48	Healthy	Healthy
1133	864.123	1_Johor	SMK PERMAS JAYA 3	25	Female	Malay									0				73	Abdominal obese				4.4	95	62	5	0.4	1.2	3.62	Healthy	Healthy
1134	864.123	1_Johor	SMK PERMAS JAYA 3	31	Female	Malay									0				77	Abdominal obese				5.1	111	72	5.9	0.7	1.6	3.98	Healthy	Healthy
1135	243.738	1_Johor	SMK DATO JAAFAR	49	Female	Chinese	Degree	Married	No	1	1	Inadequate	5	6	1800	120	No	No	84	No	14	14	22	5.4	155	98	5	1	1.3	3.25	Healthy	Healthy
1136	243.738	1_Johor	SMK DATO JAAFAR	44	Female	Indian	Degree	Married	No	7	2	Inadequate	5	7	8772		No	No	82	No	4	10	8	4.1	127	86	7.5	1.2	2.2	4.76	Healthy	Healthy
1137	243.738	1_Johor	SMK DATO JAAFAR	38	Female	Malay	Degree	Married	Yes	1	2	Inadequate	6	5	1497	270	No	No	63.5	Abdominal obese	2	6	4	5.2	110	60	6.5	0.7	2.3	3.88	Healthy	Healthy
1138	243.738	1_Johor	SMK DATO JAAFAR	34	Female	Malay	Degree	Married	No	1	2	Inadequate	6	7	1470	150	No	No	86	No	6	8	12	4.9	134	89	5.1	1.8	1	3.28	Healthy	Healthy
1139	243.738	1_Johor	SMK DATO JAAFAR	30	Female	Malay	Degree	Married	Yes	2			8	8	1440	120	Yes	No	75	Abdominal obese	0	6	10	4.7	101	68	4.7	0.4	1.8	2.72	Healthy	Healthy
1140	243.738	1_Johor	SMK DATO JAAFAR	40	Female	Malay	Degree	Married	No	0	1	Inadequate	6	8	2799		No	No	78	Abdominal obese	0	2	8	5.4	141	94	5.4	0.7	1.7	3.38	Healthy	Healthy
1141	243.738	1_Johor	SMK DATO JAAFAR	40	Female	Malay	Degree	Married	Yes	0	2	Inadequate	6	7	240		No	No	72	Abdominal obese	0	8	6	5.2	118	81	5.2	0.8	1.1	3.74	Healthy	Healthy
1142	243.738	1_Johor	SMK DATO JAAFAR	56	Male	Malay	Degree	Married	Yes	5	3	Adequate	6	6	3465		Yes	No	101	No	0	4	0	8	119	80		1.3	1.2	1.61	T2DM
1143	243.738	1_Johor	SMK DATO JAAFAR	41	Female	Malay	Degree	Married	No	0			6	8	495	120	No	No	77.5	Abdominal obese	2	6	12	4.7	119	59	6.9		1.9	3.41	Healthy	Healthy
1144	243.738	1_Johor	SMK DATO JAAFAR	39	Female	Malay	Degree	Married	Yes	0	2	Inadequate	8	8	0	30	No	No	81	No	0	0	6	5.1	107	63	4.7	0.8	1.6	2.74	Healthy	Healthy
1145	243.738	1_Johor	SMK DATO JAAFAR	32	Female	Chinese	Degree	Married	Yes	1	2	Inadequate	8	9	1440		No	No	76.5	Abdominal obese	14	6	16	5.1	122	75	5.4	1.2	1.1	3.76	Healthy	Healthy
1146	243.738	1_Johor	SMK DATO JAAFAR	31	Female	Chinese	Degree	Married	Yes	0	1	Inadequate	6	8	1356	180	No	No	70	Abdominal obese	2	0	4	5.3	112	69	5.2	0.6		2.53	Healthy	Healthy
1147	243.738	1_Johor	SMK DATO JAAFAR	31	Male	Malay	Degree	Married	Yes	1	1	Inadequate	7	8	579	120	No	No	71	Abdominal obese	6	12	12	4.6	146	82	4.1	1.1	1.6	2	Healthy	Healthy
1148	243.738	1_Johor	SMK DATO JAAFAR	24	Male	Malay	Secondary	Single	Yes	0	0	Inadequate	6	8	0		Yes	No	71	Abdominal obese	6	8	8	4.6	117	72	5.3	0.7	2	2.98	Healthy	Healthy
1149	243.738	1_Johor	SMK DATO JAAFAR	50	Male	Indian	Degree	Married	No	0	1	Inadequate	6	7	2772	180	No	No	79	Abdominal obese	10	16	14	5.2	110	76	4.5	0.8	1.6	2.54	Healthy	Healthy
1150	243.738	1_Johor	SMK DATO JAAFAR	47	Female	Indian	Degree	Married	No	2	7	Adequate	6	8	1546	40	No	No	71	Abdominal obese	0	6	6	5.6	108	73	6.2	1.6	1.2	4.27	Healthy	Impaired fasting glucose
1151	243.738	1_Johor	SMK DATO JAAFAR	28	Female	Malay	Degree	Married	Yes	0	1	Inadequate	6	7	3066		No	No	87	No	8	10	14	4.4	121	68	5.1	1	1.7	2.95	Healthy	Healthy
1152	243.738	1_Johor	SMK DATO JAAFAR	27	Female	Malay	Degree	Married	Yes	0	1	Inadequate	7	6	1462.5	20	No	No	70.5	Abdominal obese	0	2	0	4.4	112		5.7	0.7	1.8	3.58	Healthy	Healthy
1153	243.738	1_Johor	SMK DATO JAAFAR	42	Male	Malay	Degree	Married	No	0			6	6	2670	60	No	No	83	Abdominal obese	0	8	4	5	124	78	5.6	1.2	1.2	3.86	Healthy	Healthy
1154	243.738	1_Johor	SMK DATO JAAFAR	28	Male	Malay	Degree	Married	Yes	1	1	Inadequate	5	5	1668		No	No	77	Abdominal obese	22	12	24	4.4	126	72	4.2	0.8	1.1	2.74	Healthy	Healthy
1155	243.738	1_Johor	SMK DATO JAAFAR	53	Male	Malay									0				90	No				5.3	138	80	5.2	2.6	0.9	3.12	Healthy	Healthy
1156	243.738	1_Johor	SMK DATO JAAFAR	57	Male	Malay	Degree	Married	Yes				9	9	6426	720	No	No	95	No	0	2	4		138	78	5.2	1.5	1.2	3.32	T2DM
1157	243.738	1_Johor	SMK DATO JAAFAR	41	Female	Malay	Degree	Married	Yes	3	7	Adequate	6	7	1379	240	No	No	72	Abdominal obese	2	14	12	5	112	66	5.5	0.9	1.4	3.69	Healthy	Healthy
1158	243.738	1_Johor	SMK DATO JAAFAR	27	Female	Malay	Degree	Married	No	2	1	Inadequate	4	5	2073	300	No	No	72	Abdominal obese	2	14	22	4.2	110	65	4.2	1.1	1.6	2.1	Healthy	Healthy
1159	243.738	1_Johor	SMK DATO JAAFAR	57	Female	Malay	Degree	Married	Yes	1	1	Inadequate	6	6	1299	210	No	No	104.5	No	10	10	14	13.1	122	80	6.7	2	1.6	4.19	T2DM
1160	243.738	1_Johor	SMK DATO JAAFAR	40	Female	Malay	Degree	Single	No	1	1	Inadequate	7	8	1866	120	No	No	69	Abdominal obese	10	12	14	5.2	103	65	4.1	0.6	1.3	2.53	Healthy	Healthy
1161	243.738	1_Johor	SMK DATO JAAFAR	25	Male	Malay	Degree	Single	No	1	0	Inadequate	5	5	560		No	No	111.5	No	10	12	14	5	122	76	4	0.9	0.9	2.69	Healthy	Healthy
1162	243.738	1_Johor	SMK DATO JAAFAR	54	Female	Chinese	Degree	Married	No	1	1	Inadequate	8	8	438	30	No	No	80	No	0	0	0	4.6	116		5.9	1.6	1.4	3.77	Healthy	Healthy
1163	243.738	1_Johor	SMK DATO JAAFAR	47	Female	Chinese	Degree	Married	Yes	2			6	7	579	60	No	No	90	No	6	6	8	5.5	114	80	6.2	2.7	1.3	3.67	Healthy	Healthy
1164	133.725	1_Johor	SMK SERI JEMENTAH	31	Female	Malay	Degree	Married	No	1	1	Inadequate	5	6	885		No	No			10	12	16								Healthy	Healthy
1165	133.725	1_Johor	SMK SERI JEMENTAH	40	Male	Malay									0																Healthy	Healthy
1166	133.725	1_Johor	SMK SERI JEMENTAH	35	Female	Chinese	Degree	Married	No	0	1	Inadequate	8	7	495		No	No			16	4	18								Healthy	Healthy
1167	133.725	1_Johor	SMK SERI JEMENTAH	32	Female	Chinese	Degree	Single	No	1	2	Inadequate	6	7	1440		No	No			12	14	14								Healthy	Healthy
1168	133.725	1_Johor	SMK SERI JEMENTAH	30	Female	Chinese	Secondary	Single	Yes	0	3	Inadequate	6	5	0	540	No	No			0	0	0								Healthy	Healthy
1169	133.725	1_Johor	SMK SERI JEMENTAH	41	Female	Malay									0																Healthy	Healthy
1170	133.725	1_Johor	SMK SERI JEMENTAH	44	Female	Malay	Degree	Married	Yes	1			7	7	0	90	No	No			0	4	2								Healthy	Healthy
1171	133.725	1_Johor	SMK SERI JEMENTAH	51	Male	Chinese	Degree	Married	No	1	2	Inadequate	6	6	5118	240	No	No			8	12	12								Healthy	Healthy
1172	133.725	1_Johor	SMK SERI JEMENTAH	50	Male	Malay	Degree	Married	No	0	0	Inadequate	6	7	3210		No	No			2	6	8								Healthy	Healthy
1173	133.725	1_Johor	SMK SERI JEMENTAH	32	Male	Malay	Degree	Married	Yes	0	2	Inadequate	6	8	1902		No	No			0	0	0								Healthy	Healthy
1174	133.725	1_Johor	SMK SERI JEMENTAH	44	Male	Chinese	Degree	Married	No	1	1	Inadequate	7	8	495	1	No	No			22	16	26								Healthy	Healthy
1175	133.725	1_Johor	SMK SERI JEMENTAH	33	Female	Malay	Degree	Married	Yes	0	0	Inadequate	6	8	0	2	No	No			0	0	14								Healthy	Healthy
1176	133.725	1_Johor	SMK SERI JEMENTAH	38	Female	Malay	Degree	Married	No	2	2	Inadequate	5	5	840		No	No			0	2	6								Healthy	Healthy
1177	133.725	1_Johor	SMK SERI JEMENTAH	52	Male	Malay	Degree	Married	No	1	1	Inadequate	5	5	0	5	No	No			0	0	2								Healthy	Healthy
1178	133.725	1_Johor	SMK SERI JEMENTAH	33	Female	Malay	Degree	Married	No	1	1	Inadequate	5	5	930	60	No	No			0	2	0								Healthy	Healthy
1179	133.725	1_Johor	SMK SERI JEMENTAH	50	Female	Malay									0																Healthy	Healthy
1180	133.725	1_Johor	SMK SERI JEMENTAH	29	Female	Indian	Degree	Married	Yes	0	1	Inadequate	8	8	231	80	No	No			10	6	12								Healthy	Healthy
1181	158.523	1_Johor	SMK JALAN KOTA TINGGI	48	Male	Malay	Degree	Married	Yes	3	1	Inadequate	5	5	2520		Yes	No	80	Abdominal obese	0	0	4	5.9	113	78	4.7	1.6	1.4	2.57	Healthy	Impaired fasting glucose
1182	158.523	1_Johor	SMK JALAN KOTA TINGGI	53	Male	Malay	Degree	Married	No	1	7	Inadequate	6	5	720	420	Yes	No	88	Abdominal obese	6	12	16	5.3	133	85	7.9	1.1	1.2		Healthy	Healthy
1183	158.523	1_Johor	SMK JALAN KOTA TINGGI	56	Female	Malay	Degree	Married	No	2	1	Inadequate	7	9	3600		No	No	66.5	Abdominal obese	0	0	0	5.5	118	73	5.9	0.9	1.9	3.59	Healthy	Healthy
1184	158.523	1_Johor	SMK JALAN KOTA TINGGI	46	Female	Malay									0				82	No				5.3	126	76	4.3	1	1.5	2.35	Healthy	Healthy
1185	158.523	1_Johor	SMK JALAN KOTA TINGGI	31	Female	Malay									0				72.5	Abdominal obese				5.1	127	80	3.8	0.8	1.1	2.34	Healthy	Healthy
1186	158.523	1_Johor	SMK JALAN KOTA TINGGI	50	Male	Malay	Degree	Married	No	1	1	Inadequate	7	5	1440		No	No	87	Abdominal obese	16	12	14	4.7	119	62	6.6		1.2	3.9	Healthy	Healthy
1187	158.523	1_Johor	SMK JALAN KOTA TINGGI	39	Female	Malay									0				86	No				5.4	116	70	5.5	0.8	1.5	3.64	Healthy	Healthy
1188	158.523	1_Johor	SMK JALAN KOTA TINGGI	45	Male	Malay	Degree	Married	Yes	1			5	6	6636	510	No	No	109	No	10	6	10	5	117	74	4.9	1	1.4	3.05	Healthy	Healthy
1189	158.523	1_Johor	SMK JALAN KOTA TINGGI	55	Female	Malay	Master and above	Married	Yes	1	1	Inadequate	6	7	3930	180	No	No	85	No	14	12	14	6.1	124	75	4	1.9	1	2.14	T2DM
1190	158.523	1_Johor	SMK JALAN KOTA TINGGI	40	Female	Malay	Degree	Married	Yes	0	1	Inadequate	5	6	0		No	No	85	No	8	16	8	5.3	124	76	4.7	1.6	1.2	2.77	Healthy	Healthy
1191	158.523	1_Johor	SMK JALAN KOTA TINGGI	55	Male	Malay	Degree	Married	No	0	1	Inadequate	6	7	462	120	No	No	69	Abdominal obese	6	14	8	4.8	118	77	3.8	0.6	1.4	2.13	Healthy	Healthy
1192	158.523	1_Johor	SMK JALAN KOTA TINGGI	58	Male	Malay	Diploma	Married	Yes	3	2	Inadequate	7	6	0		No	No	103	No	2	8	8	5.6			6.8	1.5	1.1	5.02	Healthy	Impaired fasting glucose
1193	158.523	1_Johor	SMK JALAN KOTA TINGGI	44	Female	Malay									0				91	No				5.3	128	83	4.4	1	1	2.95	Healthy	Healthy
1194	158.523	1_Johor	SMK JALAN KOTA TINGGI	35	Female	Malay									0				83	No				4.8	133	89	5	0.8	1.7	2.94	Healthy	Healthy
1195	158.523	1_Johor	SMK JALAN KOTA TINGGI	39	Female	Malay	Degree	Divorced	Yes	1	2	Inadequate	5	6	2880	240	No	No	72	Abdominal obese	14	12	14	5.1	98		5.3	0.7	1.5	3.48	Healthy	Healthy
1196	158.523	1_Johor	SMK JALAN KOTA TINGGI	50	Female	Malay	Degree	Single	Yes	2	2	Inadequate	6	6	297	360	No	No	88.5	No	2	4	8	4.8	125	70	6.9	2.5	1.4	4.36	Healthy	Healthy
1197	158.523	1_Johor	SMK JALAN KOTA TINGGI	34	Female	Malay	Degree	Married	No	0	4	Inadequate	6	8	2565			No	67	Abdominal obese	0	0	0	4.1	118	72	4.5	0.4	1.6	2.72	Healthy	Healthy
1198	158.523	1_Johor	SMK JALAN KOTA TINGGI	38	Female	Malay	Degree	Married	Yes	0	2	Inadequate	5	6	1398		No	No	111	No	0	0	6	5.1	146	93	6.4	3	1.1	3.94	Healthy	Healthy
1199	158.523	1_Johor	SMK JALAN KOTA TINGGI	42	Female	Chinese	Degree	Married	No	3	2	Inadequate	6	7	3348	120	No	No	71.5	Abdominal obese	14	14	12	4.8	135	85	4.8	1.2	2	2.26	Healthy	Healthy
1200	158.523	1_Johor	SMK JALAN KOTA TINGGI	37	Male	Malay	Degree	Married	Yes	0	2	Inadequate	5	5	330			No	81	Abdominal obese	4	2	4	4.8	127	78	4.1	1.5	0.8	2.62	Healthy	Healthy
1201	158.523	1_Johor	SMK JALAN KOTA TINGGI	43	Male	Malay	Degree	Married	Yes	7	7	Adequate	4	5	1215		Yes	No	102	No	2	0	8	10.4	138	87	5.2	1.6	1.5	2.97	Undiagnosed T2DM
1202	158.523	1_Johor	SMK JALAN KOTA TINGGI	28	Female	Malay	Degree	Married	Yes	2	2	Inadequate	5	5	3906		No	No	63	Abdominal obese	8	6	14	4.7	105	73	5	1	2.1	2.45	Healthy	Healthy
1203	158.523	1_Johor	SMK JALAN KOTA TINGGI	32	Female	Malay	Degree	Married	Yes	0	0	Inadequate	5	4	240	60	No	No	84	No	0	0	0	5	119	73	6.4	1.4	1.2	4.56	Healthy	Healthy
1204	158.523	1_Johor	SMK JALAN KOTA TINGGI	43	Female	Malay	Degree	Married	No	0	0	Inadequate	6	6	942	30	No	No	108	No	0	0	0	6.6	154		6.4	1.8	1.2	4.38	Undiagnosed T2DM
1205	307.322	1_Johor	SMK SAINT JOSEPH	58	Male	Malay	Master and above	Married	No	1	1	Inadequate	6	7	1230	240	Yes	No	95.5	No	0	0	0	4.7	140	83	5.6	1.8	1.2	3.58	Healthy	Healthy
1206	307.322	1_Johor	SMK SAINT JOSEPH	55	Male	Malay	Degree	Married	Yes	1	1	Inadequate	6	6	393	90	No	No	112	No	0	6	4	6	149	88	6	2	1	4.09	T2DM
1207	307.322	1_Johor	SMK SAINT JOSEPH	51	Female	Malay	Degree	Married	Yes	2	2	Inadequate	6	7	1332	90	No	No	76	Abdominal obese	2	12	10	4.4	122	70	4.4	0.5	1.7	2.47	Healthy	Healthy
1208	307.322	1_Johor	SMK SAINT JOSEPH	34	Male	Malay	Degree	Married	Yes	1	1	Inadequate	6		0		Yes	No	98	No	0	10	2	5.2	124	78	6.8		1	4.39	Healthy	Healthy
1209	307.322	1_Johor	SMK SAINT JOSEPH	28	Male	Indian	Degree	Single	Yes	0	1	Inadequate	6		0	180	No	No	94	No	4	14	22	5.1	108		5.6	0.9	1.2	3.99	Healthy	Healthy
1210	307.322	1_Johor	SMK SAINT JOSEPH	40	Female	Malay	Degree	Married			1		6	5	834	420	No	No	71	Abdominal obese	2	2	4	4.3	128	79	5.9	1.7	1.3	3.83	Healthy	Healthy
1211	307.322	1_Johor	SMK SAINT JOSEPH	27	Male	Malay	Degree	Married	Yes	0	0	Inadequate	6	6	11118	60	Yes	No	76	Abdominal obese	4	8	10	5.1	120	63	4.2	1.1	1.5	2.2	Healthy	Healthy
1212	307.322	1_Johor	SMK SAINT JOSEPH	47	Male	Malay	Diploma	Married			0		6	6	11358	60	No	No	96	No	4	8	10	5.1	147	96	6.9		1.2	4.06	Healthy	Healthy
1213	307.322	1_Johor	SMK SAINT JOSEPH	44	Male	Malay	Degree	Married	Yes	1	0	Inadequate	6	6	1588.5	300	No	No	105	No	4	0	2	6	166		5	1.7	1	3.23	Healthy	Impaired fasting glucose
1214	307.322	1_Johor	SMK SAINT JOSEPH	32	Male	Malay	Degree	Married	No	1	2	Inadequate			1137	60	Yes	No	83	Abdominal obese	16	26	16	4.4	112	68	4.5	0.8	1	3.14	Healthy	Healthy
1215	307.322	1_Johor	SMK SAINT JOSEPH	30	Male	Malay	Degree	Married	Yes	1	1	Inadequate	5	5	3972	60	No	No	86	Abdominal obese	10	12	12	6	121	74	5.3	1.7	1.1	3.43	Healthy	Impaired fasting glucose
1216	307.322	1_Johor	SMK SAINT JOSEPH	26	Male	Malay	Degree	Married	Yes	1	1	Inadequate	7	6	1612	120	No	No	87	Abdominal obese	4	2	4	4.8	119	67	3.9	0.9	1	2.49	Healthy	Healthy
1217	307.322	1_Johor	SMK SAINT JOSEPH	28	Female	Malay	Degree	Married	No	1	1	Inadequate	6	7	2647.5	240	No	No	70	Abdominal obese	2	8	8	4.3	114	66	5.2	0.8	1.5	3.34	Healthy	Healthy
1218	307.322	1_Johor	SMK SAINT JOSEPH	30	Female	Malay	Master and above	Married	Yes	2	1	Inadequate	5	6	0		No	No	91	No	12	16	20	4.1	123	86	5.3	1.2	1.2	3.56	Healthy	Healthy
1219	307.322	1_Johor	SMK SAINT JOSEPH	26	Female	Malay	Degree	Single	Yes	1	1	Inadequate	8	9	0		No	No			10	18	16	4.4	117	80	4.9	0.5	2.2	2.47	Healthy	Healthy
1220	307.322	1_Johor	SMK SAINT JOSEPH	33	Female	Malay	Degree	Married	No	1			5	6	80	100	No	No	83	No	8	6	8	4.7	117	72	4.2	0.6	1.6	2.33	Healthy	Healthy
1221	307.322	1_Johor	SMK SAINT JOSEPH	48	Female	Malay	Master and above	Married	No	1	1	Inadequate	6	7	4692	60	No	No	74.5	Abdominal obese	0	0	0	5	117	67	6.5	0.8	1.7	4.44	Healthy	Healthy
1222	307.322	1_Johor	SMK SAINT JOSEPH	46	Female	Malay	Degree	Married	Yes	1	2	Inadequate	7	8	5013	120	No	No	78	Abdominal obese	8	12	10	5	141	76	5.8	1.5	1.1	4.02	Healthy	Healthy
1223	307.322	1_Johor	SMK SAINT JOSEPH	40	Female	Malay	Degree	Married	Yes	1	1	Inadequate	6	7	720	60	No	No	95	No	8	2	10	5.5	144	75	8	1.4	1.7	5.66	Healthy	Healthy
1224	307.322	1_Johor	SMK SAINT JOSEPH	50	Female	Malay	Degree	Divorced	Yes	1	1	Inadequate	5	7	720	210	No	No	103	No	16	10	10	5.3	166	101	5	1.2	1	3.46	Healthy	Healthy
1225	307.322	1_Johor	SMK SAINT JOSEPH	49	Female	Indian	Degree	Married	Yes	3	1	Inadequate	5	8	528		No	No	91	No	8	14	6	4.9	128	76	4.6	1.1	1.7	2.4	Healthy	Healthy
1226	307.322	1_Johor	SMK SAINT JOSEPH	35	Female	Malay	Master and above	Married	No	1	1	Inadequate	6	8	0	60	No	No	83	No	14	16	24	4.4	117	71	5	1.4	1.2	3.16	Healthy	Healthy
1227	307.322	1_Johor	SMK SAINT JOSEPH	46	Female	Malay	Diploma	Married	No	1	1	Inadequate	6	8	720		No	No	86	No	8	12	10	5.5	128	74	7.1	1.3	1.5	5.01	Healthy	Healthy
1228	62.182	1_Johor	SMK ANJUNG BATU	37	Female	Malay	Degree	Married	Yes	1	1	Inadequate	6	7	0		No	No	70.5	Abdominal obese	6	6	12	4.5	107	68	5.7	1.5	1.92	3.05	Healthy	Healthy
1229	62.182	1_Johor	SMK ANJUNG BATU	44	Female	Malay									0				86	No				8.4	138	78	5.2	0.8	1.33	3.45	Undiagnosed T2DM
1230	62.182	1_Johor	SMK ANJUNG BATU	31	Female	Malay	Degree	Married	No	1	1	Inadequate	7	7	0		No	No	95	No	0	10	4	4.2	126	82	4.1	1.5	1.56	1.87	Healthy	Healthy
1231	62.182	1_Johor	SMK ANJUNG BATU	49	Female	Malay	Degree	Married	No	1	2	Inadequate	5	5	4932	180	No	No	77	Abdominal obese	6	12	8	4.9	133	88	6	1.9	1.72	3.39	Healthy	Healthy
1232	62.182	1_Johor	SMK ANJUNG BATU	42	Female	Malay									0				74	Abdominal obese				4.7	123	76	4.6	1.9	2.24		Healthy	Healthy
1233	62.182	1_Johor	SMK ANJUNG BATU	43	Female	Malay	Degree	Married	No	1	0	Inadequate	8	8	1920		No	No	82	No	4	2	4	4.8	109	82	4.6	1	1.25	2.91	Healthy	Healthy
1234	62.182	1_Johor	SMK ANJUNG BATU	49	Female	Malay									0				91	No				4.4	173	100	5.5	2.1	1.33	3.18	Healthy	Healthy
1235	62.182	1_Johor	SMK ANJUNG BATU	50	Male	Malay									0				92	No				5.3	147	99	8.2		1.33		Healthy	Healthy
1236	62.182	1_Johor	SMK ANJUNG BATU	31	Female	Malay									0				104	No				5.4	140	91	6.4	0.9	1.17	4.88	Healthy	Healthy
1237	62.182	1_Johor	SMK ANJUNG BATU	33	Female	Malay									0				99	No				5	155	94	6.9	0.9	2.06	4.43	Healthy	Healthy
1238	62.182	1_Johor	SMK ANJUNG BATU	30	Female	Malay	Degree	Married	No	1	1	Inadequate	8	9	0		No	No	80	No	14	14	14	4.5	136	85	6.3		1.29	3.55	Healthy	Healthy
1239	62.182	1_Johor	SMK ANJUNG BATU	33	Female	Malay	Degree	Married	No	1	1	Inadequate		4	3450		No	No	64	Abdominal obese	12	12	12	4.7	102		5.4	0.7	1.9	3.19	Healthy	Healthy
1240	62.182	1_Johor	SMK ANJUNG BATU	42	Female	Malay									0				88	No				4.7	123	79	4.8	0.6	1.36	3.12	Healthy	Healthy
1241	62.182	1_Johor	SMK ANJUNG BATU	42	Male	Malay									0				104	No				5	155	99	7.1	1.6	1.39	4.96	Healthy	Healthy
1242	62.182	1_Johor	SMK ANJUNG BATU	42	Female	Malay									0				87	No				4.8	115	72	5.2	1	1.57	3.13	Healthy	Healthy
1243	62.182	1_Johor	SMK ANJUNG BATU	32	Male	Malay	Degree	Married	Yes	1	1	Inadequate	4	4	480		No	No	81	Abdominal obese	2	2	8	4.3	117	76	5.2	1.2	1.22	3.43	Healthy	Healthy
1244	62.182	1_Johor	SMK ANJUNG BATU	28	Female	Malay	Degree	Married	Yes	1	1	Inadequate	6	8	0	60	No	No	67	Abdominal obese	8	14	16	4.7	110	67	5.7	1	1.59	3.63	Healthy	Healthy
1245	62.182	1_Johor	SMK ANJUNG BATU	24	Female	Malay									0				67	Abdominal obese				4.8	117	75	5.1	0.6	1.54	3.22	Healthy	Healthy
1246	62.182	1_Johor	SMK ANJUNG BATU	41	Female	Malay									0				111	No				5.4	130	79	5.3	1.1	1.34	3.45	Healthy	Healthy
1247	62.182	1_Johor	SMK ANJUNG BATU	32	Female	Malay	Degree	Married	Yes		1		9	9	2866.5	180	No	No	95	No	10	14	12	4.5	122		3.8	1.4	1.12	2.04	Healthy	Healthy
1248	62.182	1_Johor	SMK ANJUNG BATU	49	Male	Malay	Degree	Married	Yes	1	2	Inadequate	7	8	3111	120	Yes	No	98	No	8	6	8	5.6	165	92	6.5	1.2	1.23	4.69	Healthy	Impaired fasting glucose
1249	62.182	1_Johor	SMK ANJUNG BATU	42	Male	Malay									0				104	No				13.8	141	84	6.7	2.2	1.24	4.46	Undiagnosed T2DM
1250	353.42	1_Johor	SMK TAMAN SELESA JAYA 2	34	Female	Malay	Degree	Married		1	1	Inadequate	5		2415	40	No	No	88	No	0	6	4	5.3	120	74	5.7	2	1.2	3.59	Healthy	Healthy
1251	353.42	1_Johor	SMK TAMAN SELESA JAYA 2	32	Female	Malay	Degree	Married	Yes	1	0	Inadequate	6	7	120		No	No	75	Abdominal obese	6	8	4	4.6	113		4.7	0.9	2	2.29	Healthy	Healthy
1252	353.42	1_Johor	SMK TAMAN SELESA JAYA 2	31	Male	Indian	Degree	Married	No	0	1	Inadequate	7	9	240	240	No	No	73	Abdominal obese	2	6	12	4.7	120	77	5.5	1.7	1.2	3.53	Healthy	Healthy
1253	353.42	1_Johor	SMK TAMAN SELESA JAYA 2	53	Female	Malay	Degree	Married	Yes	0	1	Inadequate	5	6	198		No	No	86	No	12	14	14	7.1	122	79		1.4	1.1	1.76	T2DM
1254	353.42	1_Johor	SMK TAMAN SELESA JAYA 2	47	Female	Malay	Master and above	Divorced	No	1	1	Inadequate	5	6	960		No	No	98	No	0	12	8	8		105	7.3		1.2	4.15	Undiagnosed T2DM
1255	353.42	1_Johor	SMK TAMAN SELESA JAYA 2	46	Female	Malay	Degree	Single	No	3	3	Adequate	6		5718	30		No	61	Abdominal obese	14	14	26	4.5	100	65	5.4	0.4	2	3.22	Healthy	Healthy
1256	353.42	1_Johor	SMK TAMAN SELESA JAYA 2	25	Female	Malay	Degree	Married	Yes	0	1	Inadequate	5	6	0	60	No	No	65	Abdominal obese	12	12	18	4.6	103	59	4.5	0.5	1.4	2.87	Healthy	Healthy
1257	353.42	1_Johor	SMK TAMAN SELESA JAYA 2	26	Female	Malay	Degree	Single	Yes	1	1	Inadequate	6	8	405	120	No	No	61	Abdominal obese	6	4	8	4.6	94	66	5.8	0.8	1.6	3.84	Healthy	Healthy
1258	353.42	1_Johor	SMK TAMAN SELESA JAYA 2	30	Female	Malay	Degree	Married	Yes	1	1	Inadequate	6	7	810	30	No	No	74	Abdominal obese	8	8	16	5.1	115	70	5.3	0.8	1.8	3.14	Healthy	Healthy
1259	353.42	1_Johor	SMK TAMAN SELESA JAYA 2	29	Female	Malay									0				91	No				5.2	127	78	5.4	1.2	1.4	3.46	Healthy	Healthy
1260	353.42	1_Johor	SMK TAMAN SELESA JAYA 2	32	Female	Malay	Degree	Married	No	1	7	Inadequate	6	6	720		No	No	62	Abdominal obese	2	6	6	4.9	102		5.1	0.7	1.6	3.18	Healthy	Healthy
1261	353.42	1_Johor	SMK TAMAN SELESA JAYA 2	31	Male	Malay	Degree	Married	No	0	1	Inadequate	5	6	0		No	No	77	Abdominal obese	0	2	2	4.9	122	82	4.3	0.5	1.5	2.57	Healthy	Healthy
1262	353.42	1_Johor	SMK TAMAN SELESA JAYA 2	31	Female	Chinese	Degree	Married	No	0	3	Inadequate	5	6	706.5	30	No	No	69	Abdominal obese	8	8	12	5.2	108	65		0.3	1.6	1.76	Healthy	Healthy
1263	353.42	1_Johor	SMK TAMAN SELESA JAYA 2	38	Male	Malay	Master and above	Married	Yes	1	1	Inadequate	7	7	0	270	Yes	No	97	No	14	14	14	5.2	127	91	4.6	1.3	1.3	2.71	Healthy	Healthy
1264	353.42	1_Johor	SMK TAMAN SELESA JAYA 2	35	Female	Malay	Degree	Single	Yes	1	1	Inadequate	6	5	1120	150	No	No	72	Abdominal obese	12	24	20	4.6	119	70	4.9	1.1	1.5	2.9	Healthy	Healthy
1265	353.42	1_Johor	SMK TAMAN SELESA JAYA 2	31	Female	Malay	Degree	Married	No	0	1	Inadequate	5	5	0		No	No			2	4	4	4.7	104	69	4.6	0.6	2.1	2.23	Healthy	Healthy
1266	353.42	1_Johor	SMK TAMAN SELESA JAYA 2	24	Female	Malay									0				62	Abdominal obese				4.5	108	77	4.3	0.9	1.2	2.69	Healthy	Healthy
1267	353.42	1_Johor	SMK TAMAN SELESA JAYA 2	24	Female	Malay	Degree	Single	Yes	0	1	Inadequate	8	8	967.5	30	No	No	66	Abdominal obese	8	4	10	4.5	103		3.8	0.7	1.1	2.38	Healthy	Healthy
1268	353.42	1_Johor	SMK TAMAN SELESA JAYA 2	24	Female	Other races	Degree	Single		1	1	Inadequate	8		480		No	No	66	Abdominal obese	6	4	14	4.7	117	70	4.3	0.7	1.7	2.28	Healthy	Healthy
1269	353.42	1_Johor	SMK TAMAN SELESA JAYA 2	26	Female	Malay	Degree	Single	Yes	1	2	Inadequate	8	8	2079	600	No	No	82	No	2	6	4	5.8	138	84	5.6	1.5	1.5	3.42	Healthy	Impaired fasting glucose
1270	148.987	1_Johor	SMK KOTA MASAI 2	28	Female	Malay	Degree	Single	No	0	1	Inadequate	7	8	1440	120	No	No	78	Abdominal obese	0	8	4	4.6	128	82	3.7	0.6	1.7	1.73	Healthy	Healthy
1271	148.987	1_Johor	SMK KOTA MASAI 2	29	Female	Malay	Degree	Married	Yes	0	1	Inadequate	7	7	918		No	No	77	Abdominal obese	0	2	2	4.7	119	69	4.6	0.7	1.5	2.78	Healthy	Healthy
1272	148.987	1_Johor	SMK KOTA MASAI 2	29	Female	Malay									0				68	Abdominal obese				4.6	99	60	5.8	1.8	1.2	3.78	Healthy	Healthy
1273	148.987	1_Johor	SMK KOTA MASAI 2	28	Female	Malay									0				71	Abdominal obese				4.8	121	82	4.7	0.6	1.5	2.93	Healthy	Healthy
1274	148.987	1_Johor	SMK KOTA MASAI 2	27	Female	Malay	Degree	Married	No	1	7	Inadequate	6	6	1893	60	No	No	72	Abdominal obese	0	2	0	4.6	113		6.1	0.7	1.9	3.88	Healthy	Healthy
1275	148.987	1_Johor	SMK KOTA MASAI 2	28	Female	Malay									0				70	Abdominal obese				4.2	106	62	5.8	0.9	2	3.39	Healthy	Healthy
1276	148.987	1_Johor	SMK KOTA MASAI 2	35	Male	Malay	Degree	Married		0			6	8	2694	372	No	No	91	No	10	14	16	4.6	122	73	5.6	2.6	1	3.42	Healthy	Healthy
1277	148.987	1_Johor	SMK KOTA MASAI 2	26	Female	Malay	Degree	Married	Yes	0	1	Inadequate	7	7	360	120	No	No			2	12	10	4.3	112	69	4.7	0.8	1.2	3.14	Healthy	Healthy
1278	148.987	1_Johor	SMK KOTA MASAI 2	26	Male	Malay									0				89	Abdominal obese				5.1	143	99	4.3	0.9	1.6	2.29	Healthy	Healthy
1279	148.987	1_Johor	SMK KOTA MASAI 2	43	Female	Malay	Degree	Married		0			6	7	0		No	No	80	No	10	16	18	4.9	107	64	4.8	0.4	1.9	2.72	Healthy	Healthy
1280	148.987	1_Johor	SMK KOTA MASAI 2	27	Female	Malay	Degree	Married		1	0	Inadequate	7	6	2598	60	No	No	81	No	4	12	8	4.7	110	77	6.4	0.7	2	4.08	Healthy	Healthy
1281	148.987	1_Johor	SMK KOTA MASAI 2	28	Female	Malay	Degree	Married	No	1	1	Inadequate	5	6	960		No	No	89	No	2	2	6	4.4	120	80	5.8	0.9	1.6	3.79	Healthy	Healthy
1282	148.987	1_Johor	SMK KOTA MASAI 2	32	Female	Malay	Degree	Married		1	7	Inadequate			0		No	No	67	Abdominal obese	10	10	14	4.3	113	69	3.6	0.3	1.1	2.36	Healthy	Healthy
1283	148.987	1_Johor	SMK KOTA MASAI 2	31	Female	Malay	Degree	Married	Yes	0	1	Inadequate	6	8	0		No	No	77	Abdominal obese	2	4	10	4.8	157	90	4.9	0.5	1.6	3.07	Healthy	Healthy
1284	148.987	1_Johor	SMK KOTA MASAI 2	27	Female	Malay	Degree	Single	No	1	1	Inadequate	6	6	4158		No	No			4	2	4	4.5	113	66	4.7	0.6	2.2	2.23	Healthy	Healthy
1285	148.987	1_Johor	SMK KOTA MASAI 2	27	Female	Malay									0				74	Abdominal obese				4.4	123	80	5.2	0.9	1.3	3.49	Healthy	Healthy
1286	148.987	1_Johor	SMK KOTA MASAI 2	30	Female	Malay	Degree	Single	No	1	0	Inadequate	7	7	1440		No	No	68	Abdominal obese	0	2	2	4.4	124	70	6.5	0.6		3.83	Healthy	Healthy
1287	148.987	1_Johor	SMK KOTA MASAI 2	27	Female	Malay	Degree	Married	No	0	1	Inadequate	6	7	5115	420	No	No	65	Abdominal obese	2	8	8	4.1	112	65	4.7	0.5	1.6	2.87	Healthy	Healthy
1288	148.987	1_Johor	SMK KOTA MASAI 2	43	Female	Malay	Master and above	Married	No	1	1	Inadequate	6	6	1710		No	No	80	No	0	0	2	5.5	166	73	5.5	0.9	1.5	3.59	Healthy	Healthy
1289	148.987	1_Johor	SMK KOTA MASAI 2	32	Female	Malay									0				66	Abdominal obese				4.2	112	73	7.5	0.8		4.74	Healthy	Healthy
1290	148.987	1_Johor	SMK KOTA MASAI 2	27	Female	Malay	Degree	Single	Yes	1	1	Inadequate	5	5	810	300	No	No	87	No	4	6	8	5	117	80	4.3	0.4	1.2	2.92	Healthy	Healthy
1291	148.987	1_Johor	SMK KOTA MASAI 2	30	Female	Malay	Degree	Married	No	0	0	Inadequate	8	5	480		No	No	67	Abdominal obese	6	8	12	4.3	121	67	4.9	0.8	1.7	2.84	Healthy	Healthy
1292	148.987	1_Johor	SMK KOTA MASAI 2	44	Female	Malay	Degree	Married	Yes	0	1	Inadequate	5	7	960	300	No	No	72	Abdominal obese	8	14	10	4.8	101	60	5.3	0.6	2	3.03	Healthy	Healthy
1293	148.987	1_Johor	SMK KOTA MASAI 2	27	Female	Malay									0				77	Abdominal obese				4.2	101	60	6.1	0.6	1.4	4.43	Healthy	Healthy
1294	148.987	1_Johor	SMK KOTA MASAI 2	26	Female	Malay	Degree	Married	No	1	1	Inadequate	5	5	1695	300	No	No	67	Abdominal obese	0	24	8	4.5	92		5.2	1	1.6	3.15	Healthy	Healthy
1295	148.987	1_Johor	SMK KOTA MASAI 2	24	Female	Malay									0				61	Abdominal obese				4.7	109	69	4.4	0.6	1.8	2.33	Healthy	Healthy
1296	148.987	1_Johor	SMK KOTA MASAI 2	31	Female	Malay	Degree	Single	No	0	1	Inadequate	6	6	2970	180	No	No	73	Abdominal obese	8	14	16	4.8	107	66	4.7	0.3	2	2.56	Healthy	Healthy
1297	148.987	1_Johor	SMK KOTA MASAI 2	31	Female	Malay	Degree	Married	Yes	0	1	Inadequate	5	6	2400	120	No	No	83	No	0	2	0	4.7	120	80	6.4	1	1.6	4.35	Healthy	Healthy
1298	148.987	1_Johor	SMK KOTA MASAI 2	28	Female	Malay	Degree	Married	No	7	4	Adequate	6	6	1365		No	No	67	Abdominal obese	0	4	2	4.1	99	63	4.6	0.5	2.2	2.17	Healthy	Healthy
1299	148.987	1_Johor	SMK KOTA MASAI 2	33	Female	Malay									0				92	No				4.4	105	68	6.1	2.2	1.4	3.7	Healthy	Healthy
1300	148.987	1_Johor	SMK KOTA MASAI 2	29	Male	Indian									0				87	Abdominal obese				4.8	105	64	5	1	1.1	3.45	Healthy	Healthy
1301	148.987	1_Johor	SMK KOTA MASAI 2	41	Female	Malay	Degree	Married	No	1	1	Inadequate	6	6	720	300	No	No	80	No	8	10	14	4.5	111	67	5.5	0.8	1.7	3.44	Healthy	Healthy
1302	148.987	1_Johor	SMK KOTA MASAI 2	29	Female	Malay	Degree	Married	Yes	0	2	Inadequate	8	7	960	360	No	No	74	Abdominal obese	0	2	0	4.7	100	61	4.8	1.1	1.2	3.1	Healthy	Healthy
1303	148.987	1_Johor	SMK KOTA MASAI 2	40	Female	Malay									0				104	No				4.9	117	71	4.5	1	1.2	2.85	Healthy	Healthy
1304	148.987	1_Johor	SMK KOTA MASAI 2	54	Male	Malay		Widowed	No	0	0	Inadequate	6	6	0		No	No	79	Abdominal obese	6	10	10	13	109	59	6	2.8	1.4	3.33	T2DM
1305	148.987	1_Johor	SMK KOTA MASAI 2	32	Female	Malay	Degree	Married	No	0	0	Inadequate	5	7	0	15	No	No	69	Abdominal obese	2	10	8	4.2	101	69	5.2	1	1.4	3.35	Healthy	Healthy
1306	148.987	1_Johor	SMK KOTA MASAI 2	27	Male	Malay	Degree	Married	No	0	2	Inadequate	6	7	480	60	Yes	No	81	Abdominal obese	10	14	16	5	132	82	3.8	1	1.2	2.15	Healthy	Healthy
1307	148.987	1_Johor	SMK KOTA MASAI 2	25	Male	Malay									0				100	No				5.1	131	88	6.1	1.5	1.5	3.92	Healthy	Healthy
1308	148.987	1_Johor	SMK KOTA MASAI 2	25	Female	Malay	Secondary	Single	No	1	4	Inadequate	9	9	480	180	No	No	67	Abdominal obese	0	10	10	4.2	109	69	4.8	0.6	1.6	2.93	Healthy	Healthy
1309	148.987	1_Johor	SMK KOTA MASAI 2	31	Female	Malay	Degree	Married	Yes	0	1	Inadequate	7	7	0		No	No			4	4	8	4.3	115	72	6.2	0.5	2	3.97	Healthy	Healthy
1310	148.987	1_Johor	SMK KOTA MASAI 2	33	Female	Chinese	Degree	Married	Yes	1	2	Inadequate	7	9	2772		No	No	64	Abdominal obese	2	2	4	4.7	109	70		0.6	1.5	1.73	Healthy	Healthy
1311	148.987	1_Johor	SMK KOTA MASAI 2	27	Female	Chinese	Degree	Single	No	0			7	8	1386	180	No	No	62	Abdominal obese	8	12	20	4.4	107	73	3.9	0.4	1.7	2.02	Healthy	Healthy
1312	148.987	1_Johor	SMK KOTA MASAI 2	44	Female	Malay									0				80	No				4.6	113	79	6.2	1.6	1.4	4.07	Healthy	Healthy
1313	148.987	1_Johor	SMK KOTA MASAI 2	48	Male	Indian									0				95	No				4.6	140	92	5.4	1.8	0.9	3.68	Healthy	Healthy
1314	148.987	1_Johor	SMK KOTA MASAI 2	28	Female	Malay	Degree	Single	Yes	0	1	Inadequate	6	6	306	180	No	No	79	Abdominal obese	10	12	12	5.1	110	59	4.4	0.6	1.3	2.83	Healthy	Healthy
1316	148.987	1_Johor	SMK KOTA MASAI 2	49	Female	Malay									0				88	No				4.6	152	96	5.4	1.7	1.1	3.53	Healthy	Healthy
1317	148.987	1_Johor	SMK KOTA MASAI 2	29	Male	Malay	Secondary			0	1	Inadequate	8	8	2712	30	No	No	79	Abdominal obese	4	8	8	4.7	146	71	4.7	1.1	1.1	3.1	Healthy	Healthy
1318	148.987	1_Johor	SMK KOTA MASAI 2	30	Female	Malay									0				88	No				4.7	129	90	4.3	0.7	1.5	2.48	Healthy	Healthy
1319	148.987	1_Johor	SMK KOTA MASAI 2	27	Male	Malay	Degree	Married	Yes	1	1	Inadequate	9	8	0		No	No	81	Abdominal obese	4	14	12		122	64	4.7	0.6	1.8	2.63	Healthy	Healthy
1320	148.987	1_Johor	SMK KOTA MASAI 2	39	Female	Malay									0				67	Abdominal obese				4.2	117	81	5.6	0.5	2.2	3.17	Healthy	Healthy
1321	148.987	1_Johor	SMK KOTA MASAI 2	31	Female	Malay	Degree			0	0	Inadequate	7	7	1314	210	No	No	84	No	12	12	14	4.4	118	84	5.4	2	1.1	3.39	Healthy	Healthy
1322	148.987	1_Johor	SMK KOTA MASAI 2	26	Male	Malay	Degree	Married	Yes	0	1	Inadequate	5	5	1440		No	No	91	No	6	10	4	5.6	159	90	5.1	3	1	2.74	Healthy	Impaired fasting glucose
1323	148.987	1_Johor	SMK KOTA MASAI 2	24	Female	Malay	Degree	Single	Yes	1	3	Inadequate	6	8	1386	60	No	No	68	Abdominal obese	2	8	10	4.2	114	81	4	0.4	1.6	2.22	Healthy	Healthy
1324	148.987	1_Johor	SMK KOTA MASAI 2	44	Female	Chinese	Degree	Married	No	1	1	Inadequate	6	6	2460	420	No	No	102	No	2	8	10	4.9	126	95	5.2	1	1.6	3.15	Healthy	Healthy
1325	148.987	1_Johor	SMK KOTA MASAI 2	27	Female	Malay	Degree	Married	No	1			5	7	438	420	No	No	76	Abdominal obese	8	16	18	4.8	119	75	4.1	0.5	1.3	2.57	Healthy	Healthy
1326	148.987	1_Johor	SMK KOTA MASAI 2	27	Male	Malay									0				102	No				5.1	142	90	5.6	2.1	1.2	3.45	Healthy	Healthy
1327	1902.27	1_Johor	SMK KAHANG	49	Male	Malay	Degree	Married	No	1	7	Inadequate	5	5	1752		Yes	No	115	No	2	4	4	5.1	135	81	5	1	1.2	3.35	Healthy	Healthy
1328	1902.27	1_Johor	SMK KAHANG	28	Male	Indian	Degree	Married	Yes	0	0	Inadequate	6	8	3276	120	No	No	94	No	0	12	8	5.5	129	85	7	1.3	1.5	4.91	Healthy	Healthy
1329	294.517	1_Johor	SMK AMINUDDIN BAKI	59	Female	Malay	Degree	Married	No				6	6	1280		No	No	96	No	6	6	10	5.6	110	68	4.9	1.2	1.1	3.26	Healthy	Impaired fasting glucose
1330	294.517	1_Johor	SMK AMINUDDIN BAKI	28	Female	Malay	Degree	Married	No				5	6	0		No	No	66	Abdominal obese	4	4	4	4.8	115	66	5.4	0.6	1.9	3.23	Healthy	Healthy
1331	294.517	1_Johor	SMK AMINUDDIN BAKI	48	Female	Malay	Degree	Married							0		No	No	75	Abdominal obese		14	16	4.7	111	66	4.9	0.6	1.9	2.73	Healthy	Healthy
1332	294.517	1_Johor	SMK AMINUDDIN BAKI	27	Female	Malay	Degree	Single					7	8	80		No	No	69	Abdominal obese	6	10	8	5	114	79	5	1	1.6	2.95	Healthy	Healthy
1333	294.517	1_Johor	SMK AMINUDDIN BAKI	34	Female	Malay	Degree	Married	No				4	6	0		No	No	76	Abdominal obese	4	6	10	5.4	110	77	3.8	1	1.2	2.15	Healthy	Healthy
1334	294.517	1_Johor	SMK AMINUDDIN BAKI	28	Female	Malay	Degree	Divorced					5	6	2160		No	No	93	No	6	10	10	4.7	120	80	5.3	1	1.5	3.35	Healthy	Healthy
1335	294.517	1_Johor	SMK AMINUDDIN BAKI	38	Female	Malay	Degree	Married	No				5	5	960		No	No	80	No	0	6	4	5.5	141	88	5.7	1.4	1.5	3.56	Healthy	Healthy
1336	294.517	1_Johor	SMK AMINUDDIN BAKI	51	Female	Malay	Degree	Married	Yes				6	7	0		No	No	80	No	8	10	10	5.5	121	79	6	1.5	1.6	3.72	Healthy	Healthy
1337	294.517	1_Johor	SMK AMINUDDIN BAKI	31	Female	Malay	Degree	Married	No				5	6	480			No	63	Abdominal obese	0	4	8	4.8	123	73	4.2	0.6	1.4	2.53	Healthy	Healthy
1338	294.517	1_Johor	SMK AMINUDDIN BAKI	26	Male	Other races	Degree	Single	No				8		720		No	No	69	Abdominal obese	2	8	4	4.3	114	65	3.6	0.7	0.9	2.38	Healthy	Healthy
1339	294.517	1_Johor	SMK AMINUDDIN BAKI	29	Male	Malay	Degree	Married	Yes				5	7	2880		No	No	106	No	4	6	12	4.4	138	90	5.7	1.2	1.3	3.86	Healthy	Healthy
1340	294.517	1_Johor	SMK AMINUDDIN BAKI	28	Female	Malay	Degree	Married	Yes				8	7	0		No	No	76	Abdominal obese	6	2	2	4.4	109	61	5.2	0.4	1.8	3.22	Healthy	Healthy
1341	294.517	1_Johor	SMK AMINUDDIN BAKI	31	Female	Indian	Degree	Single	Yes					8	0		No	No	72	Abdominal obese	12	2	4	5.6	116	76	6.6	2.6	1.2	4.22	Healthy	Impaired fasting glucose
1342	294.517	1_Johor	SMK AMINUDDIN BAKI	26	Male	Malay									0				100	No				5	125	75	5.4	1	1.4	3.55	Healthy	Healthy
1343	294.517	1_Johor	SMK AMINUDDIN BAKI	28	Female	Malay									0				82	No				4.7	102	59	5.4	1.6	1.4	3.27	Healthy	Healthy
1344	294.517	1_Johor	SMK AMINUDDIN BAKI	52	Female	Malay	Degree	Married	Yes				4	7	960		No	No	91	No	4	10	10	5.7	129	65	4.6	1.4	1.2	2.76	Healthy	Impaired fasting glucose
1345	294.517	1_Johor	SMK AMINUDDIN BAKI	30	Male	Malay									0				80	Abdominal obese				4.8	125	79	6.8	2.8	1.2	4.33	Healthy	Healthy
1346	294.517	1_Johor	SMK AMINUDDIN BAKI	31	Female	Malay	Degree	Single	No				6	7	0		No	No	72	Abdominal obese	0	2	0	5.4	122	80	4.6	1.2	1.1	2.96	Healthy	Healthy
1347	294.517	1_Johor	SMK AMINUDDIN BAKI	39	Female	Malay	Degree	Married	No				5	6	0		No	No	94	No	0	8	4	5.6	135	77	5.9		1		Healthy	Impaired fasting glucose
1348	294.517	1_Johor	SMK AMINUDDIN BAKI	25	Male	Malay	Degree	Single	Yes				5	8	1920			No	80	Abdominal obese	4	12	10	4.6	125	70	4.6	0.7	1.2	3.08	Healthy	Healthy
1349	294.517	1_Johor	SMK AMINUDDIN BAKI	53	Female	Malay	Secondary	Married	No				4	5	0		No	No	89	No	4	8	10	4.8	105	64	5.6	0.8	1.2	4.04	Healthy	Healthy
1350	294.517	1_Johor	SMK AMINUDDIN BAKI	33	Female	Malay	Degree	Single	No				6	5	0		No	No	72	Abdominal obese	0	2	4	5.1	112	65	4.4	0.9	1.5	2.49	Healthy	Healthy
1351	294.517	1_Johor	SMK AMINUDDIN BAKI	59	Male	Malay	Degree	Married	No				6	6	1200		Yes	No	107	No	6	6	10	6.5	133	78	3.9	1.6	1.2	1.97	Undiagnosed T2DM
1352	294.517	1_Johor	SMK AMINUDDIN BAKI	32	Female	Malay	Degree	Single	Yes				6	8	0		No	No	76	Abdominal obese	16	16	18	5.1	125	88	3.9	0.8	1.6	1.94	Healthy	Healthy
1354	91.934	1_Johor	SMK KELAPA SAWIT	27	Female	Chinese	Degree	Single		0			6	7	748.5	60	No	No			4	6	8	4.4	130	84	4.9	0.7	1.13	3.4	Healthy	Healthy
1355	91.934	1_Johor	SMK KELAPA SAWIT	35	Female	Chinese	Degree	Married		0			5	7	99		No	No			8	22	16	4.4	123	83	5.6	0.5	1.4	3.99	Healthy	Healthy
1356	91.934	1_Johor	SMK KELAPA SAWIT	48	Male	Malay	Degree	Married		0	1	Inadequate	4	4	946.5	120					2	4	8	5.3	126	76	6.1	1.5	1.32	4.15	Healthy	Healthy
1357	91.934	1_Johor	SMK KELAPA SAWIT	34	Male	Malay	Degree	Married		0	7	Inadequate	6	6	5040	240		No			2	6	8	5.2	111	67	4.6	0.6	1.21	3.08	Healthy	Healthy
1358	91.934	1_Johor	SMK KELAPA SAWIT	29	Male	Malay	Degree	Married		1	4	Inadequate	5	5	8559	210	No	No			4	6	4	4.8	131	86	6.8	2.2	1.09	4.72	Healthy	Healthy
1359	91.934	1_Johor	SMK KELAPA SAWIT	46	Female	Chinese	Master and above	Single		0			5	5	720	120	No	No			12	18		4.4	122	84	5	1	2	2.56	Healthy	Healthy
1360	91.934	1_Johor	SMK KELAPA SAWIT	26	Female	Chinese	Degree	Single		0			6	6	0	240	No	No			2	10	10	5.5	106	64	4	0.6	1.24	2.5	Healthy	Healthy
1361	91.934	1_Johor	SMK KELAPA SAWIT	27	Male	Malay	Degree	Single		0	0	Inadequate	7	8	1158	60	No	No			4	2	10	5.3	148	91	4.5	0.9	1.18	2.91	Healthy	Healthy
1362	91.934	1_Johor	SMK KELAPA SAWIT	38	Female	Chinese	Degree	Married		1	1	Inadequate	7	8	14190	60	No	No			2	4	6	4.7	133	84	6.4	1.2	1.69	4.18	Healthy	Healthy
1363	91.934	1_Johor	SMK KELAPA SAWIT	39	Female	Chinese	Degree	Married		1	1	Inadequate	6	6	5370	120								5	145	94	4.7	0.7	1.13	3.21	Healthy	Healthy
1364	91.934	1_Johor	SMK KELAPA SAWIT	53	Female	Malay		Married			7		6	6	6426	240					8	10	14	5.2	136	88	6.8	1.6	1.2	4.89	Healthy	Healthy
1365	91.934	1_Johor	SMK KELAPA SAWIT	28	Female	Chinese	Degree	Married		1	2	Inadequate	6	8	2772		No	No			8	6	14	4.6	118	74	5.9	1	2.07	3.36	Healthy	Healthy
1366	91.934	1_Johor	SMK KELAPA SAWIT	45	Male	Malay	Master and above	Married		1	1	Inadequate	6	7	1764	120	No	No			2	14	18	5.4	148	95	5.5	2.6	0.96	3.33	Healthy	Healthy
1367	91.934	1_Johor	SMK KELAPA SAWIT	30	Female	Chinese	Degree	Married		7	1	Inadequate	5	8	802.5		No	No			12	10	12	4.6	119	61	4.6	0.8	1.47	2.77	Healthy	Healthy
1368	91.934	1_Johor	SMK KELAPA SAWIT	28	Male	Malay	Degree	Married		0	0	Inadequate	5	8	1215		No	No			14	10	12	4.9	125	83	5.5	1.4	1.44	3.44	Healthy	Healthy
1369	91.934	1_Johor	SMK KELAPA SAWIT	34	Female	Chinese	Degree	Married		1	2	Inadequate	4	6	4746		No	No			12	14	16	5.5	102	75	5	1.5	1.1	3.21	Healthy	Healthy
1370	91.934	1_Johor	SMK KELAPA SAWIT	38	Female	Chinese	Degree	Married		1			8	8	1920		No	No			10	16	18	5.1	132	92	5.7	1	1.67	3.63	Healthy	Healthy
1371	91.934	1_Johor	SMK KELAPA SAWIT	27	Female	Chinese	Degree	Married		0	2	Inadequate	7		960	120	No	No			2	4	14	4.7	115	72	5.9	2.3	1.1	3.74	Healthy	Healthy
1372	91.934	1_Johor	SMK KELAPA SAWIT	27	Female	Chinese	Degree	Single		1	1	Inadequate	7	5	711	60	No	No			4	6	6	4.8	136	78	5.3	0.8	1.54	3.39	Healthy	Healthy
1373	91.934	1_Johor	SMK KELAPA SAWIT	24	Female	Chinese	Degree	Single		1	1	Inadequate	7	8	804	300	No	No			10	8	22	5	110	63	4.1	0.8	1.19	2.56	Healthy	Healthy
1374	91.934	1_Johor	SMK KELAPA SAWIT	49	Female	Chinese	Degree	Married		1	1	Inadequate	6	6	0		No	No			10	10	12	5.5	151	92	6.4	2	1.62	3.85	Healthy	Healthy
1375	91.934	1_Johor	SMK KELAPA SAWIT	48	Male	Malay	Degree	Single		1	1	Inadequate	5	4	1440	120	No	No			6	16	14	7	166	84	5.5	2.5	0.98	3.34	Undiagnosed T2DM
1376	91.934	1_Johor	SMK KELAPA SAWIT	45	Female	Chinese	Degree	Married		0	2	Inadequate	6	7	1605	120		No			8	12	14	5.1	128	68		0.6	1.08	1.86	Healthy	Healthy
1377	91.934	1_Johor	SMK KELAPA SAWIT	29	Female	Chinese	Degree	Married		1	0	Inadequate	5	5	735	30	No	No			12	14	18	4.4	101	64	3.9	1.2	1.24	2.18	Healthy	Healthy
1378	91.934	1_Johor	SMK KELAPA SAWIT	42	Female	Chinese	Degree	Married		2	2	Inadequate	5	7	4320	60	No	No			8	8	8	5.1	123	74	4.7	0.5	1.46	3	Healthy	Healthy
1379	91.934	1_Johor	SMK KELAPA SAWIT	30	Female	Chinese	Degree	Married		1	1	Inadequate	4	6	4662	240	No	No			24	24	18	4.1	118	64	6	0.7	1.89	3.8	Healthy	Healthy
1380	91.934	1_Johor	SMK KELAPA SAWIT	50	Male	Malay	Degree	Married		0	1	Inadequate	5	5	0	60	Yes	No			6	4	2	5	120	81	6.5	0.9	1.42	4.7	Healthy	Healthy
1381	91.934	1_Johor	SMK KELAPA SAWIT	39	Male	Malay	Master and above	Married		0	1	Inadequate	6	7	0	180	No	No			4	8	2	4.6	130	88	6.2	1.3	1	4.57	Healthy	Healthy
1382	91.934	1_Johor	SMK KELAPA SAWIT	33	Female	Chinese	Degree	Married		0	2	Inadequate	7	7	0		No	No			4	8	12	4.5	126	68	4.7	1.1	1.39	2.78	Healthy	Healthy
1383	91.934	1_Johor	SMK KELAPA SAWIT	30	Female	Chinese	Degree	Single		1	1	Inadequate	7	8	804	300	No	No			6	4	8	4.7	126	80	4.4	1.3	1.51	2.25	Healthy	Healthy
1384	91.934	1_Johor	SMK KELAPA SAWIT	30	Female	Chinese	Degree	Single	Yes	0	0	Inadequate	5	5	0		No	No			0	0	2	4.4	144	88	5.3	0.9	1.31	3.61	Healthy	Healthy
1385	91.934	1_Johor	SMK KELAPA SAWIT	33	Female	Chinese	Degree	Single	Yes	0	0	Inadequate	5	6	0		No	No			6	10	4	4.6	121	81	7.6	2.8	1.46	4.91	Healthy	Healthy
1386	91.934	1_Johor	SMK KELAPA SAWIT	46	Female	Chinese	Degree	Married	Yes	1	1	Inadequate	6	6	6810		No	No			2	6	4	4.3	139	80	6.6	0.8	2.01	4.21	Healthy	Healthy
1387	91.934	1_Johor	SMK KELAPA SAWIT	30	Female	Chinese	Degree	Single	No	2	2	Inadequate	5	5	0		No	No			0	0	2	7.5	162	97	5.2	1.2	0.99	3.65	Undiagnosed T2DM
1388	91.934	1_Johor	SMK KELAPA SAWIT	26	Female	Chinese	Degree	Single	Yes	0	0	Inadequate	7	7	504	360	No	No			8	14	14	4.2	141	83	5.9	0.6	2.03	3.65	Healthy	Healthy
1389	211.364	1_Johor	SMK (FELDA) KAHANG TIMUR	41	Female	Malay	Degree	Married	Yes	1	1	Inadequate	6	7	3930	240	No	No	91	No	0	0	0	7.2	124	68	6.2	2.7	1.4	3.57	Undiagnosed T2DM
1390	211.364	1_Johor	SMK (FELDA) KAHANG TIMUR	34	Female	Malay	Degree	Married	No	0	1	Inadequate	8	6	933	150	No	No	78	Abdominal obese	6	6	6	4.8	111	60	4.1	0.4	1.4	2.52	Healthy	Healthy
1391	211.364	1_Johor	SMK (FELDA) KAHANG TIMUR	32	Female	Malay	Degree	Married	Yes	0	3	Inadequate	5	6	2259	360	No	No	77	Abdominal obese	6	12	8	4.6	107	66	4.2	0.4	1.4	2.62	Healthy	Healthy
1392	211.364	1_Johor	SMK (FELDA) KAHANG TIMUR	39	Female	Malay	Degree	Married	No	1	1	Inadequate	5	6	2160		No	No	80	No	0	6	4		99		4.1	0.5	1.4	2.47	Healthy	Healthy
1393	211.364	1_Johor	SMK (FELDA) KAHANG TIMUR	53	Female	Malay	Degree	Married	Yes	0	3	Inadequate	6	6	525	60	No	No	73	Abdominal obese	4	14	8	4.7	106	67	5.2	1.2	1.4	3.26	Healthy	Healthy
1394	211.364	1_Johor	SMK (FELDA) KAHANG TIMUR	54	Female	Malay	Degree	Married	Yes	1	1	Inadequate	5	5	4716	360	No	No	86	No	0	0	0	7.7	148	71	5.5	1.2	1	3.96	T2DM
1395	211.364	1_Johor	SMK (FELDA) KAHANG TIMUR	35	Female	Malay	Degree	Married	Yes	0	1	Inadequate	5	7	99		No	No	84	No	6	14	12	4.2	111	76	4.3	0.6	1.5	2.53	Healthy	Healthy
1396	211.364	1_Johor	SMK (FELDA) KAHANG TIMUR	34	Female	Malay	Degree	Married	Yes	0	1	Inadequate	6	7	480	240	No	No	69	Abdominal obese	12	16	16	4.7	106		4.5	1.6	1.2	2.57	Healthy	Healthy
1397	211.364	1_Johor	SMK (FELDA) KAHANG TIMUR	25	Female	Malay	Degree	Married	No	0	1	Inadequate	6	7	4378	240	No	No	76	Abdominal obese	18	2	14	4.8	116	62	4.3	0.6	1.8	2.23	Healthy	Healthy
1398	211.364	1_Johor	SMK (FELDA) KAHANG TIMUR	43	Female	Malay	Degree	Married	No	1	1	Inadequate	5	6	1440		No	No	86	No	0	2	2	4.7	136	82	6.8	0.9	1.6	4.79	Healthy	Healthy
1399	211.364	1_Johor	SMK (FELDA) KAHANG TIMUR	29	Male	Malay	Degree	Single	Yes	1	1	Inadequate	5	6	2619		No	No	85	Abdominal obese	2	14	14	5	140	79	6.6	1.2	1.5	4.56	Healthy	Healthy
1400	211.364	1_Johor	SMK (FELDA) KAHANG TIMUR	42	Female	Malay	Degree	Married	Yes	2			7	8	5118	120	No	No	93	No	4	0	0	5.8	143	85	4.4	0.9	1.5	2.49	T2DM
1401	211.364	1_Johor	SMK (FELDA) KAHANG TIMUR	37	Female	Malay	Degree	Married	Yes	2	2	Inadequate	8	8	1053	30	No	No	74	Abdominal obese	8	12	12	4.9	110	61	4.7	0.6	1.8	2.63	Healthy	Healthy
1402	211.364	1_Johor	SMK (FELDA) KAHANG TIMUR	52	Male	Malay	Master and above	Married	No				6	5	3912	60	Yes	No	86	Abdominal obese	6	6	14	10.2	140	93	7.1	2.1	1.2	4.95	Undiagnosed T2DM
1403	211.364	1_Johor	SMK (FELDA) KAHANG TIMUR	40	Male	Malay	Degree	Married	Yes	0	1	Inadequate	5	6	360		No	No	100	No	0	4	8	4.9		103	5.5	1.3	1.1	3.81	Healthy	Healthy
1404	211.364	1_Johor	SMK (FELDA) KAHANG TIMUR	44	Female	Malay	Degree	Married	Yes	1	1	Inadequate	5	5	2196	60	No	No	83	No	28	28	28	4.8	124	66	5.3	0.9	1.1	3.79	Healthy	Healthy
1405	211.364	1_Johor	SMK (FELDA) KAHANG TIMUR	33	Female	Malay	Secondary	Married	Yes	1	1	Inadequate	7	7	1311	30	No	No	94	No	8	6	2	5.8	133	79	3.8	0.6	1.4	2.13	Healthy	Impaired fasting glucose
1406	211.364	1_Johor	SMK (FELDA) KAHANG TIMUR	35	Male	Malay	Degree	Married		0	1	Inadequate	6	5	0		No	No	102	No	0	0	0	4.8	127	78	4.4	1.6	0.9	2.77	Healthy	Healthy
1407	268.731	1_Johor	SMK KULAI BESAR	50	Female	Malay	Degree	Married	Yes	0	0	Inadequate	8		2475	330	No	No	79	Abdominal obese	6	20	12		165	98	4.2	2.4	1.6		T2DM
1408	268.731	1_Johor	SMK KULAI BESAR	44	Female	Malay	Master and above	Married	Yes	1	2	Inadequate	5	5	0	150	No	No	77	Abdominal obese	0	0	0	5.3	146	86	3.8	0.7	1.2	2.28	Healthy	Healthy
1409	268.731	1_Johor	SMK KULAI BESAR	37	Female	Malay	Degree	Married	Yes	0	1	Inadequate	5	5	2746.5	180	No	No	76	Abdominal obese	10	24	28	5.3	120	81	4	0.7	1.4	2.28	T2DM
1410	268.731	1_Johor	SMK KULAI BESAR	30	Male	Malay	Degree	Married	No	2	1	Inadequate	5	5	3252		No	No	74	Abdominal obese	4	10	8	4.8	115	70	4.3	1	1.2	2.65	Healthy	Healthy
1411	268.731	1_Johor	SMK KULAI BESAR	42	Female	Malay	Degree	Married	Yes	1	0	Inadequate	4	6	5358	60	No	No	77	Abdominal obese	6	12	6	4.9	114	66	3.6	0.9	1.6		Healthy	Healthy
1412	268.731	1_Johor	SMK KULAI BESAR	30	Male	Malay	Degree	Married	No	1	0	Inadequate	5	4	993	360	Yes	No	85	Abdominal obese	2	4	8	5.2	139	83	4.8	1.5	1.2	2.92	Healthy	Healthy
1413	268.731	1_Johor	SMK KULAI BESAR	44	Female	Malay	Degree	Married		1	0	Inadequate	6	6	5118	360	No	No	83	No	4	2	2	5.1	130	72	5	1.6	1.2	3.07	Healthy	Healthy
1414	268.731	1_Johor	SMK KULAI BESAR	49	Male	Malay	Master and above	Married	No	0	1	Inadequate	6		240	300	Yes	No	108	No	16	18	20	5.1			6.7	2	1.3	4.49	Healthy	Healthy
1415	268.731	1_Johor	SMK KULAI BESAR	48	Male	Malay	Degree	Married		0	0	Inadequate	6	7	4518	180	No	No	92	No	16	12	16	4.8	164		5.9	1.6	1.4	3.77	Healthy	Healthy
1416	268.731	1_Johor	SMK KULAI BESAR	40	Female	Malay	Degree	Married	Yes	2	1	Inadequate	6	6	586.5		No	No	94	No	2	2	2	6.4	149	94	5.6	2.3	1.2	3.36	Undiagnosed T2DM
1417	268.731	1_Johor	SMK KULAI BESAR	30	Female	Malay	Degree	Married	Yes		1		6	6	4320		No	No	92	No	12	10	6	4.2	123	83	5	1.1	1.3	3.2	Healthy	Healthy
1418	268.731	1_Johor	SMK KULAI BESAR	34	Female	Malay	Master and above	Married	No		4		6	7	1638	120	No	No	71	Abdominal obese	12	14	18	4.3	105	73	6.1	0.4	2.2	3.72	Healthy	Healthy
1419	268.731	1_Johor	SMK KULAI BESAR	33	Female	Malay	Degree	Married	Yes	0	1	Inadequate	7	8	2133	40	No	No	82	No	0	6	6	5	107	82	4	0.8	1.4	2.24	Healthy	Healthy
1420	400.944	1_Johor	SMK KAYU ARA PASONG	56	Female	Malay	Degree	Married		1	1	Inadequate	5	6	3822	60	No	No	76	Abdominal obese	8	2	12	5	124	67	6.5	0.9	1.88	4.21	Healthy	Healthy
1421	400.944	1_Johor	SMK KAYU ARA PASONG	29	Female	Malay	Degree	Married	No	1	1	Inadequate	5	5	0		No	No	73	Abdominal obese	6	18	14	4.3	114	64	3.9	0.4	1.69	2.03	Healthy	Healthy
1422	400.944	1_Johor	SMK KAYU ARA PASONG	36	Female	Malay	Degree	Married	No	1	1	Inadequate	5	6	0		No	No	71	Abdominal obese	4	14	8	4.6	117	69	4.5	1.2	1.11	2.85	Healthy	Healthy
1423	65.993	1_Johor	SMK ADELA	34	Female	Malay	Degree	Married	Yes	1	1	Inadequate	8	8	6942	240	No	No	61.5	Abdominal obese	0	0	0	4.6	100	62	5.2	0.8	1.69	3.12	Healthy	Healthy
1424	65.993	1_Johor	SMK ADELA	39	Female	Malay	Degree	Married	Yes	0	2	Inadequate	6	6	1471		No	No	81	No	2	2	6	4.8	103		4.1	0.8	1.38	2.39	Healthy	Healthy
1425	65.993	1_Johor	SMK ADELA	40	Female	Malay	Degree	Married	No	2	7	Adequate	6	7	4551	120	No	No	109	No	0	4	0	8.6		99	4.5	2.1	1.03	2.5	Undiagnosed T2DM
1426	65.993	1_Johor	SMK ADELA	31	Female	Malay	Degree	Married	Yes	1	1	Inadequate	6	6	462		No	No	88	No	4	6	8	5.1	115	79	5.7	1	1.25	4.02	Healthy	Healthy
1427	65.993	1_Johor	SMK ADELA	42	Female	Malay	Degree	Married	Yes	1	1	Inadequate	7	8	220		No	No	73	Abdominal obese	4	4	2	4.9	109	66	5.7	1	1.56	3.68	Healthy	Healthy
1428	65.993	1_Johor	SMK ADELA	27	Male	Malay	Degree	Married	Yes	0	1	Inadequate	6	8	0		No	No	73	Abdominal obese	8	18	14	4.8	97		5.4	0.7	1.52	3.59	Healthy	Healthy
1429	65.993	1_Johor	SMK ADELA	33	Male	Malay	Degree	Married	Yes	0	0	Inadequate	5	5	1182	120	No	No	69	Abdominal obese	6	6	12	4.9	129	75	6.1	1.3	1.55	3.93	T2DM
1430	65.993	1_Johor	SMK ADELA	36	Female	Malay	Degree	Married	Yes	1	2	Inadequate	7	6	0	180	No	No	70	Abdominal obese	2	2	2	5.1	119		5.1	0.5	1.69	3.23	Healthy	Healthy
1431	65.993	1_Johor	SMK ADELA	27	Female	Malay	Degree	Single	Yes	2	1	Inadequate	6	7	320		No	No	66	Abdominal obese	4	6	0	4.8	102	61	3.9	0.7	1.53	2.04	Healthy	Healthy
1432	65.993	1_Johor	SMK ADELA	25	Female	Malay	Secondary	Single	Yes	0	3	Inadequate	5	6	5598		No	No	96	No	4	4	10	5.6	159	92	4.6	1.2	1.06	3.03	Healthy	Impaired fasting glucose
1433	65.993	1_Johor	SMK ADELA	45	Female	Malay	Master and above	Married	Yes	1	1	Inadequate	6	6	0		No	No	84	No	4	6	8	4.4	134	81	3.6	0.8	1.96		Healthy	Healthy
1434	65.993	1_Johor	SMK ADELA	43	Female	Malay	Degree	Married	Yes	0	1	Inadequate	6	6	1455	240	No	No	75	Abdominal obese	12	16	14	5.5	116	68	5.7	0.8	1.6	3.76	Healthy	Healthy
1435	65.993	1_Johor	SMK ADELA	39	Female	Malay	Degree	Single	Yes	0	2	Inadequate	8	7	3396	120	No	No	106	No	0	8	4	5.3	155	88	5	1	1.07	3.53	Healthy	Healthy
1436	65.993	1_Johor	SMK ADELA	41	Female	Malay	Secondary	Married		1	1	Inadequate	6	7	2167.5	120		No	76	Abdominal obese	2	0	0	4.8	117	70	5.5	0.9	1.76	3.31	Healthy	Healthy
1437	65.993	1_Johor	SMK ADELA	51	Female	Malay	Degree	Married	Yes	1	1	Inadequate	6	6	0			No	117	No	0	6	2	5.8	117	65	6.6	1.6	1.05	4.8	Healthy	Impaired fasting glucose
1438	65.993	1_Johor	SMK ADELA	48	Male	Malay	Degree	Married	No	0	1	Inadequate	6	6	487.5	20	Yes	No	82	Abdominal obese	0	2	2	4.4	127	83	7	1.3	1.57	4.87	Healthy	Healthy
1439	65.993	1_Johor	SMK ADELA	41	Male	Malay	Master and above	Married	Yes	0	1	Inadequate	6	6	1518	30		No	91	No	0	4	2	4.9	133	87	6.3	2.1	1.57	3.74	Healthy	Healthy
1440	65.993	1_Johor	SMK ADELA	34	Female	Malay	Degree	Married	Yes	2	1	Inadequate	4	5	1293	120	No	No	86	No		12	10	6.1	108	72	4.4	1	1.08	2.85	Undiagnosed T2DM
1441	65.993	1_Johor	SMK ADELA	32	Female	Malay	Degree	Divorced	No	0	1	Inadequate	5	6	1920		No	No	62	Abdominal obese	4	2	2	4.3	115	66	5.6	0.9	1.64	3.56	Healthy	Healthy
1442	65.993	1_Johor	SMK ADELA	44	Male	Malay	Degree	Married	No	0	0	Inadequate	5	6	720		Yes	No	94	No	0	2	0	5.1	139	93	6.2		1.09	3.73	Healthy	Healthy
1443	65.993	1_Johor	SMK ADELA	29	Male	Malay	Master and above	Married	No		2		8	8	4644	10	No	No	88	Abdominal obese	2	6	0	4.9	139	82	5	1.1	1.27	3.28	Healthy	Healthy
1444	65.993	1_Johor	SMK ADELA	53	Female	Malay	Degree	Married	No	2	3	Adequate	6	6	1207.5	340		No	78	Abdominal obese	4	2	2	4.6	134	77	6.8	1	1.72	4.7	Healthy	Healthy
1445	65.993	1_Johor	SMK ADELA	47	Male	Malay	Master and above	Married	No	0	1	Inadequate	6	7	3252	420	No	No	86	Abdominal obese	6	6	12	4.8	123	79	7.2	2.6	1.27	4.73	Healthy	Healthy
1446	44.423	1_Johor	SMK LEDANG	47	Female	Malay	Degree	Married	No	1	2	Inadequate	6	6	0		No	No	107	No		8	10	5.8	149	97	3.7	0.8	0.95	2.4	Healthy	Impaired fasting glucose
1447	44.423	1_Johor	SMK LEDANG	56	Male	Malay	Degree	Married		1	0	Inadequate	8	9	3822	60	No	No	74	Abdominal obese		6	6	4.4	108	64	6.1	0.9	1.63	4.07	Healthy	Healthy
1448	44.423	1_Johor	SMK LEDANG	52	Female	Malay	Degree	Married	No	1			6	7	0		No	No	87	No		2	2	13.4	141	77	6.9	1.8	1.64	4.43	Undiagnosed T2DM
1449	44.423	1_Johor	SMK LEDANG	39	Female	Malay		Married		1	2	Inadequate	4	5	0			No	62	Abdominal obese		2	4	5.1	94		4.6	0.6	1.95	2.37	Healthy	Healthy
1450	44.423	1_Johor	SMK LEDANG	46	Female	Chinese		Married		0	1	Inadequate	6	7	0			Yes	60.4	Abdominal obese		10	12	4.4	131	63	5	0.7	1.78	2.85	Healthy	Healthy
1451	44.423	1_Johor	SMK LEDANG	29	Male	Indian		Married		1	1	Inadequate	8		0			No	97	No		6	4	4.9	118	75	4.2	0.9	1.12	2.64	Healthy	Healthy
1452	44.423	1_Johor	SMK LEDANG	49	Female	Malay	Degree	Married	Yes	2	1	Inadequate	6	7	7800		No	No	95	No		2	4	5.9	171	96	5.6	2.8	1.57	2.77	Healthy	Impaired fasting glucose
1453	44.423	1_Johor	SMK LEDANG	30	Female	Malay	Degree	Married	No	2	7	Adequate	6	8	0		Yes	No	67	Abdominal obese		4	2	4.4	105	77	4.1	0.5	1.67	2.18	Healthy	Healthy
1454	44.423	1_Johor	SMK LEDANG	39	Female	Chinese	Degree	Married	No	0	3	Inadequate	6	7	0		No	No	96.5	No		4	8	5	128	73	5.3	1.1	1.32	3.48	T2DM
1455	44.423	1_Johor	SMK LEDANG	56	Male	Malay	Degree	Married	No	3	3	Adequate	6	5	360		No	No	85	Abdominal obese	0	2	6	10.1	156	98	6.2	1.7	1.09	4.3	Undiagnosed T2DM
1456	44.423	1_Johor	SMK LEDANG	45	Female	Malay	Degree	Married	Yes	1	2	Inadequate	7	7	3545	180	No	No	91	No	2	2	2	6.7	121	78	5.8	1.7	1.29	3.74	Undiagnosed T2DM
1457	44.423	1_Johor	SMK LEDANG	48	Male	Malay	Degree	Widowed					6	6	4158		No	No	83	Abdominal obese	2	8	10	4.8	136	83	5	0.6	1.27	3.45	Healthy	Healthy
1458	44.423	1_Johor	SMK LEDANG	32	Female	Malay	Degree	Married	Yes	1	2	Inadequate	6	8	4638		No	No	70	Abdominal obese	4	0	2	5.2	106	63	3.8	0.8	1.44	2.04	Healthy	Healthy
1459	44.423	1_Johor	SMK LEDANG	54	Male	Indian	Degree	Married	No	1	1	Inadequate	5	7	1173	300	No	No	88	Abdominal obese	12	14	8	4.6	136	83	5.3	1.8	1.24	3.2	Healthy	Healthy
1460	44.423	1_Johor	SMK LEDANG	34	Female	Malay	Degree	Married	No	0	0	Inadequate	7	6	537		No	No	60.5	Abdominal obese	2	12	8	4.6	90	59	6.2	0.8	1.89	3.92	Healthy	Healthy
1461	44.423	1_Johor	SMK LEDANG	34	Female	Malay	Degree	Married	No	1			7	8	3905	150		No	60	Abdominal obese	2	0	2	4.7	112	69	4.1	0.5	1.38	2.48	Healthy	Healthy
1462	44.423	1_Johor	SMK LEDANG	29	Male	Malay	Degree	Single	Yes				6	5	3324	180	No	No	73	Abdominal obese	14	14	14	5	133	87	4.5	1.7	0.96	2.81	Healthy	Healthy
1463	44.423	1_Johor	SMK LEDANG	36	Male	Chinese	Master and above	Married	Yes	1	1	Inadequate	6	7	4080	240		Yes	86	Abdominal obese	2	2	2	4.4	135	76	5.2	0.7	1.63	3.26	Healthy	Healthy
1464	44.423	1_Johor	SMK LEDANG	31	Female	Malay	Degree	Married	No	1	1	Inadequate	8	7	1026.5	25	No	No	97.5	No	0	0	0	4.5	140	82	5.7	1.4	1.42	3.61	Healthy	Healthy
1465	44.423	1_Johor	SMK LEDANG	52	Male	Indian	Secondary	Married	No	1	2	Inadequate	6	7	2259	360	No	No	100	No	2	2	0	5.3	125	78	4.7	0.6	1.71	2.69	Healthy	Healthy
1466	44.423	1_Johor	SMK LEDANG	49	Female	Chinese	Degree	Single	Yes	0	1	Inadequate	7	8	120		No		72.5	Abdominal obese	0	0	0	5.7	118	72	6.3	1		3.31	Healthy	Impaired fasting glucose
1467	44.423	1_Johor	SMK LEDANG	47	Female	Malay	Degree	Married	No	1	1	Inadequate	7	7	471		No		78	Abdominal obese	0	8	6	5.7	125	70	6.2	1.6	2.11	3.38	Healthy	Impaired fasting glucose
1468	44.423	1_Johor	SMK LEDANG	59	Female	Chinese	Degree	Married	No	1			7	8	1252	120	Yes	No	66	Abdominal obese	0	2	4	5.2	148	77	4.8	1	1.96	2.36	Healthy	Healthy
1469	44.423	1_Johor	SMK LEDANG	37	Female	Malay		Married		1	2	Inadequate	5	8	4158		No	No	82	No	4	2	6	5.2	129	81	4.9	1.1	1.95	2.46	Healthy	Healthy
1470	44.423	1_Johor	SMK LEDANG	34	Male	Malay		Married		0	0	Inadequate	5	6	1215	240	No	No	83.5	Abdominal obese	2	4	4	5.1	129	91	6	0.9	1.32	4.22	Healthy	Healthy
1471	44.423	1_Johor	SMK LEDANG	30	Female	Malay		Married		0	0	Inadequate	8	9	1626		No	No	78.5	Abdominal obese	2	12	8		126	65	4.4	1.7	1.15	2.47	Healthy	Healthy
1472	71.992	1_Johor	SMK LOKMAN HAKIM	41	Female	Malay	Degree	Married	Yes	1	1	Inadequate	7	6	5850	120	No	No	94	No	2	4	6	5	143	89	4.2	1.5	1.14	2.4	Healthy	Healthy
1473	71.992	1_Johor	SMK LOKMAN HAKIM	30	Female	Malay	Degree	Married	No	0	4	Inadequate	7	8	866	300	No	No	68	Abdominal obese	6	0	6	4.5	99	66	4.3	0.9	1.45	2.47	Healthy	Healthy
1474	71.992	1_Johor	SMK LOKMAN HAKIM	34	Female	Malay	Degree	Married		1	2	Inadequate	6	7	6132	300		No	104	No	0	4	10	5.4	164	101	3.8	1.8	0.98	2.04	Healthy	Healthy
1475	71.992	1_Johor	SMK LOKMAN HAKIM	41	Female	Malay	Master and above		Yes	1	2	Inadequate	5	5	4158		No	No	82	No	4	8	16	11.7	115	77	5.6	1.1	1.52	3.57	Undiagnosed T2DM
1476	71.992	1_Johor	SMK LOKMAN HAKIM	26	Female	Malay	Degree	Married		0	0	Inadequate	6	8	120		No	No	62	Abdominal obese	14	18	18	4.3	101	64	3.8	0.5	1.16	2.42	Healthy	Healthy
1477	71.992	1_Johor	SMK LOKMAN HAKIM	33	Female	Malay	Master and above	Married	Yes	2	2	Inadequate	6	7	6132	240	No	No	86	No	0	4	10	4.4	106	64	5.2	1.4	1.64	2.94	Healthy	Healthy
1478	71.992	1_Johor	SMK LOKMAN HAKIM	35	Female	Malay	Degree	Married	Yes	0	1	Inadequate	8	8	2148	120		No	78	Abdominal obese	0	4	10	10.3	116	76	6.4	1.1	1.33	4.57	T2DM
1479	71.992	1_Johor	SMK LOKMAN HAKIM	41	Male	Malay	Degree	Married	No	1	1	Inadequate	7	7	560		No	No	97	No	10	10	12	4.3	160	90	4.8	1	1.11	3.22	Healthy	Healthy
1480	71.992	1_Johor	SMK LOKMAN HAKIM	25	Female	Malay	Degree	Married		1	2	Inadequate	6	7	787.5	180	No	No	64	Abdominal obese	2	4	2	4.8	102	62	4.7	0.5	1.65	2.8	Healthy	Healthy
1481	71.992	1_Johor	SMK LOKMAN HAKIM	53	Female	Malay	Degree	Married		1	1	Inadequate	7	7	0	60	No	No	84	No	12	16	18	5.1	134	78	6.5	0.8	1.98	4.12	Healthy	Healthy
1482	71.992	1_Johor	SMK LOKMAN HAKIM	42	Female	Malay	Degree	Married	No	1	2	Inadequate	6	7	240		No	No	80	No	0	0	2	4.6	107		4.6	0.6	1.25	3.05	Healthy	Healthy
1483	71.992	1_Johor	SMK LOKMAN HAKIM	49	Male	Malay	Degree	Married	No	1	2	Inadequate	7	8	367.5	180	Yes	No	98	No	18	8		5.7	162	109	6	1.6	1.18	4.07	Healthy	Impaired fasting glucose
1484	71.992	1_Johor	SMK LOKMAN HAKIM	40	Female	Malay	Degree	Married	Yes	0	1	Inadequate	5	5	486		No	No	79.5	Abdominal obese	0	2	6	5.1	118	75	5.6	0.4	1.72	3.66	Healthy	Healthy
1485	71.992	1_Johor	SMK LOKMAN HAKIM	40	Female	Malay	Degree	Married	Yes	2	2	Inadequate	8	8	3360	60	No	No	82.5	No	0	4	10	4.9	107	64	5.7	1.3	1.36	3.73	Healthy	Healthy
1486	71.992	1_Johor	SMK LOKMAN HAKIM	26	Male	Malay	Degree	Married	No	0	0	Inadequate	5	5	600		No	No	82	Abdominal obese	12	12	12	4.3	119	68	4.2	0.7	1.02	2.82	Healthy	Healthy
1487	71.992	1_Johor	SMK LOKMAN HAKIM	54	Female	Malay	Master and above	Married	Yes	2					198	60		No	91	No	16	24	22	6	129	71	6.7	1.2	1.39	4.81	Healthy	Impaired fasting glucose
1488	71.992	1_Johor	SMK LOKMAN HAKIM	44	Female	Malay	Degree	Married	Yes	1	2	Inadequate	7	8	1455	120	No	No	67	Abdominal obese	4	12	6	4.5	100	67	5.8	1.4	1.91	3.2	Healthy	Healthy
1489	71.992	1_Johor	SMK LOKMAN HAKIM	41	Female	Malay	Degree	Married	No		1		6	5	0		No	No	88	No	2	20	16	5.2	118	72	4.1	1.4	0.98	2.48	Healthy	Healthy
1490	71.992	1_Johor	SMK LOKMAN HAKIM	41	Female	Malay	Degree	Married	No	1	1	Inadequate	6	6	885	120		No	72	Abdominal obese	0	2	6	4.7	150	93	5.2	1	1.74	2.99	Healthy	Healthy
1491	71.992	1_Johor	SMK LOKMAN HAKIM	36	Male	Malay	Degree	Married	Yes	0	0	Inadequate	5	5	0		No	No	99	No	12	6	16	4.7	120	73	6.3	1.9	1.28	4.22	Healthy	Healthy
1492	71.992	1_Johor	SMK LOKMAN HAKIM	28	Female	Malay	Degree	Married	Yes	1	1	Inadequate	7	8	300		No	No	74	Abdominal obese	4	6	6	4.5	125	82	5.2	1.6	1.15	3.29	Healthy	Healthy
1493	42.806	1_Johor	SMK LAKSAMANA	45	Female	Malay	Secondary	Married	No	1	2	Inadequate	7	8	2382	420	No	No	85	No	6	14	10	4.8	109	77	4.9	1.2	1.49	2.82	Healthy	Healthy
1494	42.806	1_Johor	SMK LAKSAMANA	42	Male	Malay	Degree	Married	Yes	1	7	Inadequate	6	6	4290	210	No	No	89	Abdominal obese	0	0	0	5.1	125	87	5	2	1.05	3.06	Healthy	Healthy
1495	42.806	1_Johor	SMK LAKSAMANA	41	Female	Malay	Degree	Married	Yes	0	7	Inadequate	5	7	2133	15	No	No	81.5	No	0	6	4	6.6	148	82	6.8	1.9	1.14	4.84	Undiagnosed T2DM
1496	42.806	1_Johor	SMK LAKSAMANA	41	Male	Malay	Diploma	Married	Yes	0	1	Inadequate	5	6	1440	120	Yes	No			12	14	18	5.6	122	84	5.9	2	1.16	3.87	Healthy	Impaired fasting glucose
1497	42.806	1_Johor	SMK LAKSAMANA	56	Female	Malay	Degree	Married	Yes	1	0	Inadequate	6	6	80			No	79.5	Abdominal obese	0	8	2	4.4	127	63	6.6	1.3	1.83	4.12	Healthy	Healthy
1498	42.806	1_Johor	SMK LAKSAMANA	54	Male	Malay	Diploma	Married		8	2	Inadequate	6	6	0	30		No	90	No	0		0	5.3	128	66	5.9	2.4	1.1	3.76	Healthy	Healthy
1499	42.806	1_Johor	SMK LAKSAMANA	51	Female	Chinese	Degree	Single	Yes	1	2	Inadequate	5	7	3492	180	No	No	88	No	14	14	16	5.4	134	78	6.3	1.4	1.59	4.04	Healthy	Healthy
1500	42.806	1_Johor	SMK LAKSAMANA	26	Female	Malay	Degree	Single	Yes	0	1	Inadequate	6	6	99	120	No	No	72	Abdominal obese	12	6	12	4.6	110	66	5.1	0.5	1.54	3.34	Healthy	Healthy
1501	42.806	1_Johor	SMK LAKSAMANA	36	Female	Malay	Master and above	Married	Yes	0	1	Inadequate			720		No	No	115.5	No	0	6	8	7.4	118	81	7	2.4	1.3	4.57	Undiagnosed T2DM
1502	42.806	1_Johor	SMK LAKSAMANA	44	Female	Malay	Degree	Married	No	7	7	Adequate	6	6	1257			No	72	Abdominal obese	0	2	2	5	106	62	4.5	1.5	1.47	2.3	Healthy	Healthy
1503	42.806	1_Johor	SMK LAKSAMANA	43	Female	Chinese	Degree	Married	No	2	1	Inadequate	6	7	1038	60		No	86.5	No	12	12	14	5.6	151	100	4.9	1.7	1.15	3.01	Healthy	Impaired fasting glucose
1504	42.806	1_Johor	SMK LAKSAMANA	52	Female	Malay	Master and above	Married		0	5	Inadequate	5	7	4638		No	No	73	Abdominal obese	14	12	14	4.4	108	66	5.1	1.5	1.82	2.54	Healthy	Healthy
1505	42.806	1_Johor	SMK LAKSAMANA	50	Female	Malay	Degree	Married	No	1			5	6	0		No	No	71	Abdominal obese	2	6	4	5	105	71	5.3	0.7	1.75	3.17	Healthy	Healthy
1506	42.806	1_Johor	SMK LAKSAMANA	36	Female	Malay	Degree	Married		0	0	Inadequate			99		No	No	106	No	6	8	10	4.9	139	92	6.2	1.8	1.37	3.99	Healthy	Healthy
1507	42.806	1_Johor	SMK LAKSAMANA	47	Male	Malay	Degree	Married	No	1	1	Inadequate	6	7	1012	180	No	No	99	No	0	2	4	5.3	153	87	6.8	2.9	1.12	4.32	Healthy	Healthy
1508	42.806	1_Johor	SMK LAKSAMANA	47	Male	Malay	Degree	Married	Yes	1	1	Inadequate	5	5	2430	60	No	No	84	Abdominal obese	4	12	10	5.6	173	87	5.8	1.1	1.4	3.94	Healthy	Impaired fasting glucose
1509	42.806	1_Johor	SMK LAKSAMANA	31	Female	Malay	Degree	Married	No	1	1	Inadequate			0		No	No	78.5	Abdominal obese	12	14	14	4.8	119	66	4.8	0.8	1.32	3.15	Healthy	Healthy
1510	42.806	1_Johor	SMK LAKSAMANA	46	Female	Malay	Degree	Married	No	0	1	Inadequate	5	5	1066.5	20		No	72.5	Abdominal obese	0	2	2	4.7	137	81	5.5	1.6	1.47	3.29	Healthy	Healthy
1511	42.806	1_Johor	SMK LAKSAMANA	45	Female	Indian	Degree	Married	Yes	1	3	Inadequate	6	7	8730	450	No	No	94.5	No				9.1	141	78	5	2.8	1.38	2.4	T2DM
1512	42.806	1_Johor	SMK LAKSAMANA	44	Female	Malay	Degree	Married	No	1			5	6	1506	60	No	No	77.5	Abdominal obese	0	2	2	4.8	110	65	4.6	0.7	1.41	2.87	Healthy	Healthy
1513	42.806	1_Johor	SMK LAKSAMANA	38	Male	Malay	Degree	Married	No	0	2	Inadequate	7	6	4650	480		No	85.5	Abdominal obese	12	10	12	4.8	111	68	4.9	1.3	1.14	3.14	Healthy	Healthy
1514	42.806	1_Johor	SMK LAKSAMANA	38	Male	Malay	Degree	Married	Yes	1	2	Inadequate	5	6	0		No	No	113	No	4	8	14	5.4	116	72	7.5	1	1.51	5.5	Healthy	Healthy
1515	42.806	1_Johor	SMK LAKSAMANA	27	Female	Malay	Degree	Single	Yes	0	4	Inadequate	6	7	1626		No	No	75.5	Abdominal obese	4	4	2	4.5	114	72	3.6	0.5	1.03	2.32	Healthy	Healthy
1516	42.806	1_Johor	SMK LAKSAMANA	47	Female	Malay	Degree	Married		1	1	Inadequate		8	0		No	No	63	Abdominal obese	10	6	12	4.6	108	67	4.5	0.5	1.65	2.64	Healthy	Healthy
1517	42.806	1_Johor	SMK LAKSAMANA	45	Female	Malay	Degree	Married	Yes	1			5	6	1200	60	No	No	72.5	Abdominal obese	2	12	12	4.7	123	69	4.5	1.3	1.25	2.66	Healthy	Healthy
1518	42.806	1_Johor	SMK LAKSAMANA	45	Male	Indian	Degree	Married	No	0	0	Inadequate	6	8	918	90	Yes	No	84	Abdominal obese	2	2	4	5.1	146	95	4.8	1	1.03	3.28	Healthy	Healthy
1519	42.806	1_Johor	SMK LAKSAMANA	29	Female	Chinese	Degree	Single	No	0	4	Inadequate	8	8	240		No		61	Abdominal obese	2	2	6	4.9	96	65	4.8	0.7	1.89	2.54	Healthy	Healthy
1520	42.806	1_Johor	SMK LAKSAMANA	25	Female	Chinese	Secondary	Single	Yes	1	1	Inadequate	8	6	0	360	No		76.5	Abdominal obese	0	2	4	5.1	106	63	6	0.7	2.05	3.63	Healthy	Healthy
1521	42.806	1_Johor	SMK LAKSAMANA	48	Female	Malay	Degree	Married	Yes	0	2	Inadequate	7	8	2970	180	No		81	No	8	22	16	4.8	134	72	5.4		1.18	2.76	Healthy	Healthy
1522	42.806	1_Johor	SMK LAKSAMANA	30	Female	Chinese	Degree	Married	No	2			7		4398	120	No		67	Abdominal obese	2	8	14	4.8	112	67	4.3	0.7	1.28	2.73	Healthy	Healthy
1523	42.806	1_Johor	SMK LAKSAMANA	33	Female	Malay	Degree	Married	Yes	1	0	Inadequate	6	6	3445		No		74.5	Abdominal obese	0	4	0	4.8	95	64	4.5	1.5	1.47	2.39	Healthy	Healthy
1524	181.169	1_Johor	SMK LAYANG-LAYANG	33	Female	Malay	Degree	Single	Yes	0	1	Inadequate	6	6	462	720	No	No	69	Abdominal obese	4	6	8	5	111	70	6.3	0.9	1.7	4.19	Healthy	Healthy
1525	181.169	1_Johor	SMK LAYANG-LAYANG	39	Female	Malay	Degree	Married	Yes	1	1	Inadequate			120	180	No	No	73	Abdominal obese	4	6	12	4.5	132	75	5.2	1.1	1.5	3.2	Healthy	Healthy
1526	181.169	1_Johor	SMK LAYANG-LAYANG	49	Female	Malay	Degree	Married	Yes	1			6	8	706.5	60	No	No	83	No	0	4	4	5.7	128	69	5	0.9	1.8	2.79	Healthy	Impaired fasting glucose
1527	181.169	1_Johor	SMK LAYANG-LAYANG	44	Female	Chinese	Degree	Married	No	1	1	Inadequate	7	8	0		No	No	89	No	34	24	32	5.7	135	76	4.5	2	1.4	2.19	Healthy	Impaired fasting glucose
1528	181.169	1_Johor	SMK LAYANG-LAYANG	40	Female	Malay	Degree	Single	No	1	1	Inadequate	5	8	600		No	No	67	Abdominal obese	2	8	10	5.5	133	77	6.1	0.6	2.3	3.53	Healthy	Healthy
1529	181.169	1_Johor	SMK LAYANG-LAYANG	53	Male	Malay	Degree	Married	Yes		5		6	7	1653			No	87	Abdominal obese		0	2	5.1	127	82	5.6		0.9	3.25	Healthy	Healthy
1530	181.169	1_Johor	SMK LAYANG-LAYANG	31	Female	Chinese	Degree	Single	Yes	1	3	Inadequate	6		2253	300	No	Yes	79	Abdominal obese	8	10	20	5	105	78	5	0.7	1.5	3.18	Healthy	Healthy
1531	181.169	1_Johor	SMK LAYANG-LAYANG	25	Male	Indian	Degree	Single	Yes	1	1	Inadequate	5	7	240			No	87	Abdominal obese	14	14	16	4.3	126	81	4.4	1	0.9	3.05	Healthy	Healthy
1532	181.169	1_Johor	SMK LAYANG-LAYANG	25	Female	Indian	Degree	Single	No	0	2	Inadequate	8	8	480		No	No	71.5	Abdominal obese	2	4	6	4.7	101	64	5.6	1.1	1.1	4	Healthy	Healthy
1533	181.169	1_Johor	SMK LAYANG-LAYANG	36	Female	Malay	Degree	Married	No	1	7	Inadequate	6	6	1786.5	60	No	No	67.5	Abdominal obese	8	10	14	4.6	106	68	3.6	0.6	1	2.33	Healthy	Healthy
1534	181.169	1_Johor	SMK LAYANG-LAYANG	27	Male	Malay	Degree	Married	No	1	0	Inadequate	4	4	7520		No	No	81	Abdominal obese	12	12	14	4.4	129	69	4.2	0.7	1.3	2.58	Healthy	Healthy
1535	181.169	1_Johor	SMK LAYANG-LAYANG	31	Female	Malay	Degree	Married	Yes	1	1	Inadequate	7	8	1260			No	72	Abdominal obese	4	6	8	5	128	88	6.3	0.6	1.5	4.53	Healthy	Healthy
1536	181.169	1_Johor	SMK LAYANG-LAYANG	48	Male	Malay	Degree	Married	No	1	2	Inadequate	4	6	3184	60	No	No	92	No	6	12	12	7.2	147	94	7.3		1.3	3.96	T2DM
1537	181.169	1_Johor	SMK LAYANG-LAYANG	26	Male	Malay	Degree	Single	Yes	0	1	Inadequate	5	4	0		No	No			10	16	18	4.8	172	104	5.9	0.8	1.1	4.44	Healthy	Healthy
1538	181.169	1_Johor	SMK LAYANG-LAYANG	25	Female	Malay	Degree	Married	No	0	0	Inadequate	7	7	1805		No	No	80	No	6	8	12	4.6	109	71	4.9	0.7	1.2	3.38	Healthy	Healthy
1539	181.169	1_Johor	SMK LAYANG-LAYANG	44	Male	Malay	Master and above	Married	No	3	3	Adequate	6	6	3630	60	No	No	97	No	2	4	4	5.4	132	82	7.2		1.2	4.46	Healthy	Healthy
1540	181.169	1_Johor	SMK LAYANG-LAYANG	51	Male	Malay	Degree	Married	Yes	2	2	Inadequate	6	6	297			No	93	No	4	0	2	4.2	135	92	4.9	1.1	1.2	3.2	Healthy	Healthy
1541	181.169	1_Johor	SMK LAYANG-LAYANG	39	Female	Malay	Degree	Married	No	0	1	Inadequate	6	6	0	360	No	No	77.5	Abdominal obese	4	8	12	5	125	75	4.9	0.7	1.7	2.88	Healthy	Healthy
1542	181.169	1_Johor	SMK LAYANG-LAYANG	43	Female	Indian	Degree	Single	No	0	1	Inadequate		9	0		No	No	98	No	8	10	14	5.1	130	71	4.1	0.5	1.5	2.37	Healthy	Healthy
1543	181.169	1_Johor	SMK LAYANG-LAYANG	41	Male	Malay	Degree	Married		0	1	Inadequate	6	5	1062		Yes	No	83	Abdominal obese	10	14	10	5.6	116	71	5.2	0.9	1.49	3.25	Healthy	Impaired fasting glucose
1544	436.688	1_Johor	SMK MUNSHI ABDULLAH (KULAI)	32	Female	Malay	Degree	Married	No	0	1	Inadequate	7	7	5145		No	No	62	Abdominal obese	4	10	8	4.1	123	85	4.3	0.9	1.4	2.49	T2DM
1545	436.688	1_Johor	SMK MUNSHI ABDULLAH (KULAI)	34	Female	Malay	Degree	Married	No	0	1	Inadequate	6	5	0	150	No	No	82	No	2	12	10	4.7	107	73	5.8	1.4	1.6	3.56	Healthy	Healthy
1546	436.688	1_Johor	SMK MUNSHI ABDULLAH (KULAI)	36	Female	Malay									0				79	Abdominal obese				4.9	136	74	4	1.2	0.8	2.66	Healthy	Healthy
1547	436.688	1_Johor	SMK MUNSHI ABDULLAH (KULAI)	48	Female	Chinese									0				72	Abdominal obese				5.5	123	80	5.3	0.9	1.5	3.39	Healthy	Healthy
1548	436.688	1_Johor	SMK MUNSHI ABDULLAH (KULAI)	40	Female	Malay	Degree	Married	No	0	1	Inadequate	6	6	1200	180	No	No	70	Abdominal obese	10	26	36	5	115	81	4.4	0.8	1.2	2.84	Healthy	Healthy
1549	436.688	1_Johor	SMK MUNSHI ABDULLAH (KULAI)	25	Male	Malay									0				98	No				4.8	138	78	5	2.2	1.1	2.9	Healthy	Healthy
1550	436.688	1_Johor	SMK MUNSHI ABDULLAH (KULAI)	28	Female	Indian									0				90	No				5.3	124	81	5.2	1	1.3	3.45	Healthy	Healthy
1551	436.688	1_Johor	SMK MUNSHI ABDULLAH (KULAI)	49	Male	Malay	Master and above	Married	Yes		1		8	8	3573	240	No	No	94	No	6	10	10	5.8	136	81	6	1	1.6	3.95	Healthy	Impaired fasting glucose
1552	720.103	1_Johor	SMK TAMAN MEGAH RIA	42	Female	Chinese	Degree	Married	Yes	1	1	Inadequate	6	6	3939	120	No	No	78	Abdominal obese	14	10	14	5.1	113	72				3.39	Healthy	Healthy
1553	720.103	1_Johor	SMK TAMAN MEGAH RIA	27	Female	Malay	Degree	Married	Yes	1	1	Inadequate	5	7	720		No	No	88	No	4	2	6	4.1	122	77				2.99	Healthy	Healthy
1554	720.103	1_Johor	SMK TAMAN MEGAH RIA	25	Female	Malay	Degree	Married	Yes	1	1	Inadequate	6	6	7758	480	No	No	66	Abdominal obese	4	8	4	4.3	129	91			2.24	2.24	Healthy	Healthy
1555	720.103	1_Johor	SMK TAMAN MEGAH RIA	37	Female	Malay	Secondary	Single	No	1	1	Inadequate	6	6	4398		No	No	63	Abdominal obese	2	6	10	4.7	102	61				3.32	Healthy	Healthy
1556	720.103	1_Johor	SMK TAMAN MEGAH RIA	27	Female	Malay	Degree	Married	No	0	1	Inadequate	8	9	560	180	No	No	71	Abdominal obese	2	6	10		109	76				2.42	Healthy	Healthy
1557	720.103	1_Johor	SMK TAMAN MEGAH RIA	25	Female	Malay	Degree	Single	Yes	3	2	Inadequate	7	6	1200		No	No	64	Abdominal obese	16	10	14	5.1	95					2.61	Healthy	Healthy
1558	232.44	1_Johor	SMK MUNSHI SULAIMAN	45	Female	Malay									0				79	Abdominal obese				4.8	141	94	3.8	0.6	1.6	1.93	Healthy	Healthy
1559	232.44	1_Johor	SMK MUNSHI SULAIMAN	37	Female	Malay	Degree	Married	Yes	0	1	Inadequate	8	7	1539		No	No	79	Abdominal obese	4	10	10		130	80	5	0.8	1.5	3.14	Healthy	Healthy
1560	232.44	1_Johor	SMK MUNSHI SULAIMAN	46	Female	Malay	Degree	Single	Yes	0	1	Inadequate	6	7	480		No	No	67.5	Abdominal obese	2	10	8	4.8	110	69	5.2	1.1	1.8	2.9	Healthy	Healthy
1561	232.44	1_Johor	SMK MUNSHI SULAIMAN	52	Female	Malay	Degree	Married	No	0	1	Inadequate	5	6	5598		No	No	83.1	No	6	6	8	5.3	145	78	5.5	1.1	1.7	3.3	Healthy	Healthy
1562	232.44	1_Johor	SMK MUNSHI SULAIMAN	49	Female	Malay	Degree	Married	No	1	1	Inadequate	5	6	1554	480	No	No	82.4	No	0	2	0	5.2	131	73	7.1	1.5	1.6	4.82	Healthy	Healthy
1563	232.44	1_Johor	SMK MUNSHI SULAIMAN	46	Female	Chinese	Degree	Divorced	No	1	1	Inadequate	7	8	0	150	No	No	64.1	Abdominal obese	0	0	2	4.8	113		5.7	0.5	2	3.47	Healthy	Healthy
1564	232.44	1_Johor	SMK MUNSHI SULAIMAN	53	Male	Malay	Master and above	Married	No	0	0	Inadequate	5	6	3870	240	No	No	78.5	Abdominal obese	0	8	6	5.5	136	76	6.2	0.7	1	4.58	Healthy	Healthy
1565	232.44	1_Johor	SMK MUNSHI SULAIMAN	45	Female	Malay	Degree	Married	No	0	1	Inadequate	5	7	638	180	No	No	81	No	0	0	0	4.3	120	75	4.7	0.7	1.6	2.78	Healthy	Healthy
1566	232.44	1_Johor	SMK MUNSHI SULAIMAN	47	Male	Chinese	Degree	Married	Yes	1	4	Inadequate	6	6	942	300	Yes	No	91	No	0	0	0	4.9	137	87	4.4	1.2	1.1	2.76	Healthy	Healthy
1567	232.44	1_Johor	SMK MUNSHI SULAIMAN	48	Male	Malay									0				89.5	Abdominal obese				5.8	155	94	5.1	1.3	1.3	3.21	Healthy	Impaired fasting glucose
1568	232.44	1_Johor	SMK MUNSHI SULAIMAN	37	Female	Malay	Degree	Married	Yes	0	1	Inadequate	6	7	1653	120	No	No	73.5	Abdominal obese	12	12	14	4.6	108	68	5.3	1.6	1.4	3.17	Healthy	Healthy
1569	232.44	1_Johor	SMK MUNSHI SULAIMAN	31	Female	Chinese	Secondary	Married	Yes	0	0	Inadequate			33		No	No	73	Abdominal obese	4	4	2	4.7	99		4.1	0.7	1.8	1.98	Healthy	Healthy
1570	232.44	1_Johor	SMK MUNSHI SULAIMAN	56	Female	Malay	Degree	Widowed	Yes	1	1	Inadequate	5	6	1980	120	No	No	81.5	No	14	2	6	6.5	132	75	5.4	0.9	1.6	3.39	T2DM
1571	232.44	1_Johor	SMK MUNSHI SULAIMAN	33	Female	Malay	Degree	Single	No	0	1	Inadequate	6	6	2400	360	No	No	73.5	Abdominal obese	0	2	4	4.9	106	70	6.6	0.8		3.84	Healthy	Healthy
1572	232.44	1_Johor	SMK MUNSHI SULAIMAN	43	Female	Malay	Degree	Married	Yes	1	1	Inadequate	5	6	558	30	No	No	76.5	Abdominal obese	8	6	14	4.8	143	89	6	1.7	1.3	3.93	Healthy	Healthy
1573	232.44	1_Johor	SMK MUNSHI SULAIMAN	29	Male	Malay	Degree	Married	Yes	0	2	Inadequate	6	5	2994	120	Yes	No			22	26	22	4.3	135	80	5.4		1	2.99	Healthy	Healthy
1574	232.44	1_Johor	SMK MUNSHI SULAIMAN	27	Female	Chinese	Degree	Married	No	1	2	Inadequate	6	8	4638	360	No	No	68	Abdominal obese	0	0	0	4.6	110	70	4	0.8	1.4	2.24	Healthy	Healthy
1575	232.44	1_Johor	SMK MUNSHI SULAIMAN	26	Female	Malay									0				87	No				4.6	96	71	7.1		1.4	4.29	Healthy	Healthy
1576	85.455	1_Johor	SEKOLAH TINGGI MUAR	59	Female	Chinese	Degree	Married	No				7	9	1710	120	No	No	87	No	2	6	6	4.9	143	74	5.5	1.9	1.76	2.88	Healthy	Healthy
1577	85.455	1_Johor	SEKOLAH TINGGI MUAR	36	Male	Malay	Master and above	Married	Yes	0	0	Inadequate	6	6	1680		No	No	88.5	Abdominal obese	0	2	10	5.2	133	87	6.1	1.4	1.59	3.87	Healthy	Healthy
1578	85.455	1_Johor	SEKOLAH TINGGI MUAR	46	Female	Malay	Degree	Married	No	0	0	Inadequate	9	9	4419	720	No	No	65	Abdominal obese	10	12	14	4.7	104	65	4.6	0.7	1.51	2.77	Healthy	Healthy
1579	85.455	1_Johor	SEKOLAH TINGGI MUAR	34	Male	Malay	Master and above	Married	Yes	0	1	Inadequate	5	6	5422	180	No	No	99	No	8	8	12	5.1	145	82	5.8	1.3	1.3	3.91	Healthy	Healthy
1580	85.455	1_Johor	SEKOLAH TINGGI MUAR	39	Female	Chinese	Degree	Married	Yes	1	4	Inadequate	7	8	240	480	No	No	66	Abdominal obese	4	4	10	4.7	106	61		0.9	1.5		Healthy	Healthy
1581	85.455	1_Johor	SEKOLAH TINGGI MUAR	28	Male	Malay	Degree	Married	No	1	1	Inadequate	5	6	5422	180	Yes	No	85	Abdominal obese	8	8	12	4.8	125	73	3.7	1.2	0.98	2.18	Healthy	Healthy
1582	85.455	1_Johor	SEKOLAH TINGGI MUAR	49	Male	Malay	Master and above	Married	No				6	6	3276	60	Yes	No	78	Abdominal obese	0	0	2	4.9	151	87	3.7	1.1	1.37	1.83	Healthy	Healthy
1583	85.455	1_Johor	SEKOLAH TINGGI MUAR	49	Male	Malay	Degree	Married	No	1			5	5	4878	180	No	No	71	Abdominal obese	0	0	0	4.7	112	68	8	1	2.13	5.42	Healthy	Healthy
1584	85.455	1_Johor	SEKOLAH TINGGI MUAR	46	Female	Malay									0				114	No				5	167	97	6.6	1.2	1.6	4.46	Healthy	Healthy
1585	85.455	1_Johor	SEKOLAH TINGGI MUAR	55	Female	Malay	Degree	Married	No	0	1	Inadequate	5	5	2799	240	No	No	94	No	0	2	4	5.3	131	66	6.2	1.8	1.84	3.54	Healthy	Healthy
1586	85.455	1_Johor	SEKOLAH TINGGI MUAR	35	Female	Malay	Master and above	Married	Yes	1	2	Inadequate	5	6	1866		No	No	75.5	Abdominal obese	8	4	10	5.1	115	73	4.4	1	1.4	2.55	Healthy	Healthy
1587	85.455	1_Johor	SEKOLAH TINGGI MUAR	52	Female	Malay		Widowed	No				6	6	148.5	30	No	No	88	No	2	10	16	5.5	126	75	5.6	1.1	1.56	3.54	Healthy	Healthy
1588	85.455	1_Johor	SEKOLAH TINGGI MUAR	52	Female	Malay	Degree	Married	Yes	2	2	Inadequate	6	6	2316	120			98	No				4.9		94	5.8	1.1	1.64	3.66	Healthy	Healthy
1589	85.455	1_Johor	SEKOLAH TINGGI MUAR	53	Male	Malay									0				96	No				5.4	139	92	6.4	2	1.35	4.14	Healthy	Healthy
1590	85.455	1_Johor	SEKOLAH TINGGI MUAR	44	Female	Malay	Degree	Married	Yes	4	4	Adequate	5	6	586.5				104	No				4.5	138		5.1	1	1.11	3.54	Healthy	Healthy
1591	85.455	1_Johor	SEKOLAH TINGGI MUAR	54	Female	Chinese	Degree	Married	No				5	8	0	240			72.5	Abdominal obese				5.1	110	67	5.3	1.4	1.28	3.38	Healthy	Healthy
1592	85.455	1_Johor	SEKOLAH TINGGI MUAR	50	Male	Chinese	Degree	Married	Yes	1	1	Inadequate	5	5	1596	300	No	No	92	No	14	14	14	5.7	137	89	4.3	1.1	1.38	2.42	Healthy	Impaired fasting glucose
1593	85.455	1_Johor	SEKOLAH TINGGI MUAR	48	Female	Chinese	Degree	Single	Yes	1	1	Inadequate	7	8	4860	780			82	No				5.4	121	75	4	1.4	1.17	2.19	Healthy	Healthy
1594	85.455	1_Johor	SEKOLAH TINGGI MUAR	55	Female	Malay	Degree	Married	No	2	2	Inadequate	6	6	3360				100	No				5	94	73	6.1	1.2	1.56	4	Healthy	Healthy
1595	85.455	1_Johor	SEKOLAH TINGGI MUAR	50	Female	Malay	Degree	Married	No	0	1	Inadequate	6		4293	120	No	No	78.5	Abdominal obese	0	0	2	5	130	85	7.3	1.7	1.75	4.78	Healthy	Healthy
1596	85.455	1_Johor	SEKOLAH TINGGI MUAR	56	Male	Chinese	Degree	Married		1	2	Inadequate	6	7	876	120	No	Yes	87	Abdominal obese	8	12	14	4.6	129	74	5.6	1.4	1.19	3.77	Healthy	Healthy
1597	85.455	1_Johor	SEKOLAH TINGGI MUAR	32	Female	Malay	Degree	Married	Yes	1	1	Inadequate	7	7	480		No	No	61	Abdominal obese	8	8	12	4.2	105	61	3.8	0.9	1.99		T2DM
1598	85.455	1_Johor	SEKOLAH TINGGI MUAR	40	Female	Malay	Degree	Married	Yes	1	1	Inadequate	5	7	0	120	No	No	94	No	8	8	6	9.6	147	87	5.8	2.6	1.32	3.3	Undiagnosed T2DM
1599	85.455	1_Johor	SEKOLAH TINGGI MUAR	37	Female	Malay	Degree	Married	No	5	2	Inadequate	6		1179	240	No	No	77.5	Abdominal obese	6	8	14	4.7	136	80	5.2	2	1.07	3.22	Healthy	Healthy
1600	85.455	1_Johor	SEKOLAH TINGGI MUAR	34	Female	Malay									0				62	Abdominal obese				4.2	101	66		0.4	1.37		Healthy	Healthy
1601	85.455	1_Johor	SEKOLAH TINGGI MUAR	33	Male	Malay	Degree	Married	Yes	2	1	Inadequate	6	7	3930	120	No	No	106	No	8	6	6	4.4	166	105	6.9	1.4	1.42	4.84	Healthy	Healthy
1602	85.455	1_Johor	SEKOLAH TINGGI MUAR	32	Male	Malay	Degree	Married	Yes	1	1	Inadequate	5	6	960			No	69	Abdominal obese	0	0	2	4.9	115	74	5.3	1.3	1.34	3.37	Healthy	Healthy
1603	85.455	1_Johor	SEKOLAH TINGGI MUAR	35	Female	Malay	Degree	Married	No	1			7	8	0		No	No	82.5	No	10	14	12	5.4	127	81	5.8	0.9	1.45	3.94	Healthy	Healthy
1604	85.455	1_Johor	SEKOLAH TINGGI MUAR	39	Female	Malay	Degree	Married	No	1	1	Inadequate	5	5	318	300	No	No	82.5	No	2	2	8	4.6	111	63	4.7	0.7	1.33	3.05	Healthy	Healthy
1605	85.455	1_Johor	SEKOLAH TINGGI MUAR	48	Male	Malay		Married	Yes				6	6	0		No	No	96	No	0	0	0	6.3	124	70	5.1	1.2	1.12	3.44	Undiagnosed T2DM
1606	85.455	1_Johor	SEKOLAH TINGGI MUAR	55	Female	Malay	Master and above	Single	No	4			6	7	1320	210	No	No	79	Abdominal obese	4	6	6	4.9	163	76	5.5	1.2	1.25	3.71	Healthy	Healthy
1607	85.455	1_Johor	SEKOLAH TINGGI MUAR	54	Male	Malay									0				90	No				5	149	99	5.4		0.82		Healthy	Healthy
1608	114.556	1_Johor	SMK DATO' MOHD. YUNOS SULAIMAN	27	Female	Malay									0				79	Abdominal obese				4.8	106	66	4	0.9	1.4	2.19	Healthy	Healthy
1609	114.556	1_Johor	SMK DATO' MOHD. YUNOS SULAIMAN	39	Female	Malay	Degree	Married	Yes	0			5	5	4278		No	No	87	No	4	16	6	5.5	149	79	7	1.8	1.57	4.59	Healthy	Healthy
1610	114.556	1_Johor	SMK DATO' MOHD. YUNOS SULAIMAN	32	Female	Malay	Degree	Married	No	0	1	Inadequate	8	7	4638	360	No	No	73	Abdominal obese	8	8	10	4.5	99	61	4.6	0.5	1.79	2.58	Healthy	Healthy
1611	114.556	1_Johor	SMK DATO' MOHD. YUNOS SULAIMAN	29	Female	Malay	Master and above	Single	Yes	0	2	Inadequate	5	6	2772	480	No	No	86	No	2	4	4	5	124	74	7	2.4	1.05	4.83	Healthy	Healthy
1612	114.556	1_Johor	SMK DATO' MOHD. YUNOS SULAIMAN	46	Female	Malay	Degree	Married	Yes	2	1	Inadequate	5	5	1413	120	No	No	83	No	8	14	12	7.3	157	87	4.6	0.8	1.49	2.74	Undiagnosed T2DM
1613	114.556	1_Johor	SMK DATO' MOHD. YUNOS SULAIMAN	28	Female	Malay	Degree	Single	Yes	1	1	Inadequate	5	6	1365	300	No	No	76	Abdominal obese	6	12	14	5.2	129	79	4.9	1.3	1.25	3.07	Healthy	Healthy
1614	114.556	1_Johor	SMK DATO' MOHD. YUNOS SULAIMAN	50	Male	Malay	Degree	Married	No	1	1	Inadequate	5	5	1462.5	60	Yes	No	92	No	4	4	2	5.1	138	89	3.6	0.7	1.91		Healthy	Healthy
1615	114.556	1_Johor	SMK DATO' MOHD. YUNOS SULAIMAN	28	Female	Malay									0				72	Abdominal obese							5.5	0.5	1.3	3.93	Healthy	Healthy
1616	114.556	1_Johor	SMK DATO' MOHD. YUNOS SULAIMAN	24	Female	Malay	Degree	Single	No	0	1	Inadequate	6	5	11358	120	No	No	60	Abdominal obese	2	8	10	4.8	111	75		0.3	1.29	1.66	Healthy	Healthy
1617	114.556	1_Johor	SMK DATO' MOHD. YUNOS SULAIMAN	23	Female	Malay	Degree	Single	No	0	1	Inadequate	7	6	11358	120	No	No	60	Abdominal obese	2	6	10	4.8	105	90	5	0.5	1.77	2.97	Healthy	Healthy
1618	114.556	1_Johor	SMK DATO' MOHD. YUNOS SULAIMAN	48	Male	Malay	Degree	Married	No	1	1	Inadequate	6	6	9879	90	No	No	87	Abdominal obese	0	8	6	4.4	113	74	5	1.3	1.25	3.12	Healthy	Healthy
1619	114.556	1_Johor	SMK DATO' MOHD. YUNOS SULAIMAN	31	Female	Malay	Degree	Single	No	0	2	Inadequate	6	8	33	600	No	No			14	8	14		137	95	4.6	0.6	2.11	2.19	Healthy	Healthy
1620	114.556	1_Johor	SMK DATO' MOHD. YUNOS SULAIMAN	42	Female	Malay	Degree	Married	Yes	0	1	Inadequate	6	8	360		No	No	78	Abdominal obese	4	20	18	5.1	102	70	5.2	2.1	1.08	3.13	Healthy	Healthy
1621	41.455	1_Johor	SMK SRI MERSING	33	Female	Malay	Degree	Married	No	0	1	Inadequate	7	7	351	600	No	No	66.5	Abdominal obese	0	4	4	4.5	111	61	4.5	0.4	1.9	2.45	Healthy	Healthy
1622	41.455	1_Johor	SMK SRI MERSING	34	Female	Malay									0				76	Abdominal obese				5	105	69	4.8	0.6	1.65	2.9	Healthy	Healthy
1623	41.455	1_Johor	SMK SRI MERSING	27	Female	Malay	Degree	Married	No	0	1	Inadequate	6	5	358		No	No	65	Abdominal obese	4	2	4	5.3	128	80	5.4	1.4	1.7	3.13	Healthy	Healthy
1624	41.455	1_Johor	SMK SRI MERSING	28	Female	Malay	Degree	Married	Yes	0	1	Inadequate	6	6	1653		No	No			6	12	24	4	157	64	5	0.6	1.75	2.95	Healthy	Healthy
1625	41.455	1_Johor	SMK SRI MERSING	41	Female	Malay									0				96	No				5.1	155	99	4.9	1	1.06	3.39	Healthy	Healthy
1626	41.455	1_Johor	SMK SRI MERSING	39	Female	Malay	Degree	Married	No	0	1	Inadequate	5	6	0		No	No	69.5	Abdominal obese	12	20	16	5	120	77	4.6	0.6	1.51	2.83	Healthy	Healthy
1627	41.455	1_Johor	SMK SRI MERSING	25	Female	Malay	Degree	Single	Yes	1	1	Inadequate	8	8	120		No	No	66	Abdominal obese	2	4	8	4.7	118	80	4	0.4	1.64	2.22	Healthy	Healthy
1628	41.455	1_Johor	SMK SRI MERSING	27	Female	Malay	Degree	Single	Yes	0	2	Inadequate	6	8	3930	240	No	No	89	No	4	8	8	5.1	102	73	6.5	0.6	1.23	5.01	Healthy	Healthy
1629	41.455	1_Johor	SMK SRI MERSING	49	Female	Malay	Degree	Married	No	1	1	Inadequate	6	7	4638	180	No	No	67	Abdominal obese	2	8	4	5.4	104		5	1.1	1.37	3.12	Healthy	Healthy
1630	41.455	1_Johor	SMK SRI MERSING	35	Male	Malay									0				81	Abdominal obese				4.8	120	77	5.8	1.1	1.4	3.91	Healthy	Healthy
1631	41.455	1_Johor	SMK SRI MERSING	33	Male	Malay	Degree	Married		0			6	6	6792	180	Yes	No	80	Abdominal obese	6	0	2	4.9	123	78	5.1	2.1	1.13	2.98	Healthy	Healthy
1632	41.455	1_Johor	SMK SRI MERSING	44	Female	Malay	Degree	Married	Yes	1	0	Inadequate	6	8	0	180	No	No	67	Abdominal obese	8	12	8	4.3	93		5.5	0.8	1.43	3.67	T2DM
1633	41.455	1_Johor	SMK SRI MERSING	26	Female	Malay									0				98	No				4.5	112	67	5.4	0.8	1.23	3.77	Healthy	Healthy
1634	41.455	1_Johor	SMK SRI MERSING	42	Female	Malay	Degree	Married	No	1			6	7	5598	330	No	No	65	Abdominal obese	4	4	6	5.2	103	63	4	0.8	1.42	2.17	Healthy	Healthy
1635	41.455	1_Johor	SMK SRI MERSING	48	Female	Malay									0				78	Abdominal obese				4.9	140	83	5.3	1.3	1.28	3.42	Healthy	Healthy
1636	41.455	1_Johor	SMK SRI MERSING	44	Female	Malay									0				92	No				8.1	126	73	3.7	1.8	1.27	1.67	Undiagnosed T2DM
1637	41.455	1_Johor	SMK SRI MERSING	29	Female	Malay									0				63	Abdominal obese				4.4	118	76	5.1	0.7	1.42	3.35	Healthy	Healthy
1638	41.455	1_Johor	SMK SRI MERSING	29	Female	Malay									0				72	Abdominal obese				4.7	119	64	6	1.1	1.57	3.98	Healthy	Healthy
1639	41.455	1_Johor	SMK SRI MERSING	42	Female	Malay									0				88	No				4.7	140	90	6.3	2	1.45	3.95	Healthy	Healthy
1640	41.455	1_Johor	SMK SRI MERSING	27	Female	Malay	Degree	Single	Yes	1	7	Inadequate	7	7	273	20	No	No	70	Abdominal obese	12	10	6	4.9	108	70	4.3	0.7	1.4	2.64	Healthy	Healthy
1641	41.455	1_Johor	SMK SRI MERSING	59	Female	Malay	Degree	Married	Yes	1	1	Inadequate			0	390	No	No	104	No	2	2	0	5	142	74	4.3	1	1.52	2.38	Healthy	Healthy
1642	41.455	1_Johor	SMK SRI MERSING	43	Female	Malay	Degree	Married	Yes	1	1	Inadequate	6	7	5820	240		No	70	Abdominal obese	6	4	8	4.6	112	76	5.1	0.9	1.45	3.25	Healthy	Healthy
1643	41.455	1_Johor	SMK SRI MERSING	25	Male	Chinese	Degree	Single	No	1	1	Inadequate	7	8	480	120	No	No	80	Abdominal obese	2	2	2	5.2	137	75	4.5	0.7	1.22	3	Healthy	Healthy
1644	41.455	1_Johor	SMK SRI MERSING	31	Female	Malay	Degree	Married	No	0	4	Inadequate	6	6	0	240	No	No	79	Abdominal obese	0	0	0	4.6	115	85	5.4	0.8	1.83	3.24	Healthy	Healthy
1645	41.455	1_Johor	SMK SRI MERSING	30	Male	Malay	Degree	Married	No	2	1	Inadequate	8	8	1794		No	No	89	Abdominal obese	18	22	14	5.4	126	76	6.4	0.8	1.43	4.59	Healthy	Healthy
1646	41.455	1_Johor	SMK SRI MERSING	32	Female	Malay	Degree	Single	No	0	1	Inadequate	6	8	4249.5		No	No	76	Abdominal obese	12	6	6	4.7	99	71	5	0.8	1.17	3.43	Healthy	Healthy
1647	41.455	1_Johor	SMK SRI MERSING	27	Female	Malay	Degree	Single	No	0	3	Inadequate	7	8	5838	420	No	No	76	Abdominal obese	4	2	8	4	120	84	4.7	0.4	1.48	3.08	Healthy	Healthy
1648	41.455	1_Johor	SMK SRI MERSING	53	Female	Malay	Degree	Single	Yes	1	1	Inadequate	6	7	240	60	No	No	88	No	4	8	2	5.9	117	77	5.1	1.2	1.42	3.13	Healthy	Impaired fasting glucose
1649	41.455	1_Johor	SMK SRI MERSING	30	Female	Malay	Degree	Single	No	1	1	Inadequate	6	6	720	480	No	No	75	Abdominal obese	12	2	14	4.6	115	66	5.7	0.9	1.33	3.93	Healthy	Healthy
1650	41.455	1_Johor	SMK SRI MERSING	31	Female	Malay	Degree	Married	Yes	1	2	Inadequate	8	9	2373		No	No	75	Abdominal obese	10	8	10	4.6	125	86	5	0.9	1.37	3.19	Healthy	Healthy
1651	41.455	1_Johor	SMK SRI MERSING	45	Female	Malay									0				88	No				4.6	137	70	4.8	0.8	1.59	2.85	Healthy	Healthy
1652	41.455	1_Johor	SMK SRI MERSING	39	Female	Malay	Degree	Married	Yes	0	1	Inadequate	4	5	165		No	No	81	No	12	16	16	5	143	99	6	1	2.07	3.44	Healthy	Healthy
1653	41.455	1_Johor	SMK SRI MERSING	28	Female	Malay	Secondary	Single	No	3	5	Adequate	6	5	2754		No	No	84	No	6	8	10	4.7	114	77	5.2	0.8	1.56	3.25	Healthy	Healthy
1654	101.279	1_Johor	SMK BANDAR MAHARANI	51	Female	Malay	Degree	Married	No	1	1	Inadequate	7	6	1464	160	No	No			4	6	4	5.5	135	90	5.8	1.2	1.35	3.96	Healthy	Healthy
1655	101.279	1_Johor	SMK BANDAR MAHARANI	46	Female	Malay	Degree	Married	Yes	2	2	Inadequate	5	5	49.5	180	No	No	100.5	No	4	6	10	5	148	75	4.7	1.5	1.33	2.71	Healthy	Healthy
1656	101.279	1_Johor	SMK BANDAR MAHARANI	32	Female	Malay	Degree	Single		1	0	Inadequate	8	5	2613	60	No	No	87	No	12	24	24	4.7	121	80	4.9	1.8	1.13	2.89	Healthy	Healthy
1657	101.279	1_Johor	SMK BANDAR MAHARANI	29	Female	Malay									0				91	No				5.1	130	79	5.4	1.1	1.35	3.57	Healthy	Healthy
1658	101.279	1_Johor	SMK BANDAR MAHARANI	48	Male	Malay	Degree	Married	Yes	4	0	Inadequate	5	5	2880		Yes	No	86	Abdominal obese	8	14	12	6	146	69	6.9	0.8	1.53	5	Healthy	Impaired fasting glucose
1659	101.279	1_Johor	SMK BANDAR MAHARANI	48	Female	Malay									0				101	No				4.4	119	76	7.4	1.6	1.4	5.29	Healthy	Healthy
1660	101.279	1_Johor	SMK BANDAR MAHARANI	47	Female	Malay									0				85	No				4.8	131	74	5.4	1.4	1.58	3.17	Healthy	Healthy
1661	101.279	1_Johor	SMK BANDAR MAHARANI	33	Female	Malay	Degree	Married	No	1	2	Inadequate	5	5	0		No	No	68.2	Abdominal obese	0	6	4	4.7	125	74	5.2	0.7	1.54	3.38	Healthy	Healthy
1662	101.279	1_Johor	SMK BANDAR MAHARANI	33	Female	Malay	Degree	Married	Yes	1	1	Inadequate	6	6	120		No	No	73	Abdominal obese	8	6	16	4.3	117	64	5.1	0.8	1.07	3.68	Healthy	Healthy
1663	101.279	1_Johor	SMK BANDAR MAHARANI	46	Female	Malay	Degree	Married	Yes		7		5	6	1071	780	No	No	86	No	0	10	6	5.5	119	70	6.5	1.2	1.37	4.59	Healthy	Healthy
1664	101.279	1_Johor	SMK BANDAR MAHARANI	46	Female	Malay	Degree	Married	Yes	1	1	Inadequate			0		No	No	81	No	4	6	6	9.2	123	73	5.1	2.1	1.49	2.67	Undiagnosed T2DM
1665	101.279	1_Johor	SMK BANDAR MAHARANI	33	Female	Malay	Degree	Married	No	1	1	Inadequate	8	8	660	120	No	No	69	Abdominal obese	0	2	0	4.3	104	70	4.5	0.6	1.38	2.8	Healthy	Healthy
1666	101.279	1_Johor	SMK BANDAR MAHARANI	45	Male	Malay	Degree	Married	No	0	1	Inadequate	6	5	7245	120	No	No	91.3	No	4	18	18	5	123	77	4.6	2.3	0.98	2.61	Healthy	Healthy
1667	101.279	1_Johor	SMK BANDAR MAHARANI	33	Female	Malay	Degree	Married	No	0	1	Inadequate	4	5	4678	180	No	No	62	Abdominal obese	6	6	4	4.5	117	66	4.2	0.4	1.38	2.63	Healthy	Healthy
1668	101.279	1_Johor	SMK BANDAR MAHARANI	43	Female	Malay	Degree	Married	Yes	2	3	Adequate	5	6	4158		No	No	72	Abdominal obese	10	2	10	4.3	124	80	4.8	0.8	1.61	2.83	Healthy	Healthy
1669	101.279	1_Johor	SMK BANDAR MAHARANI	46	Female	Malay	Degree	Married	Yes	2	1	Inadequate	5	6	612	120	No	No	93	No	6	12	8	4.6	158	83	4.8	1.1	1.79	2.56	Healthy	Healthy
1670	101.279	1_Johor	SMK BANDAR MAHARANI	45	Female	Malay	Degree	Married	Yes	1	1	Inadequate	6	6	1845	180	No	No	115	No	8	14	12	5.9	137	88	4.8	2.4	1.07	2.62	Healthy	Impaired fasting glucose
1671	101.279	1_Johor	SMK BANDAR MAHARANI	28	Female	Malay	Degree	Married	No		3		8	6	3012	150	No	No	78	Abdominal obese	10	6	14	4.6	115	68		0.4	1.33	1.77	Healthy	Healthy
1672	101.279	1_Johor	SMK BANDAR MAHARANI	51	Female	Malay	Degree	Married	Yes	0			6	7	0	120	No	No	93	No	4	10	8	4.6	143	92	4.6	0.8	1.64	2.58	Healthy	Healthy
1673	101.279	1_Johor	SMK BANDAR MAHARANI	45	Female	Malay	Degree	Married	Yes	2	1	Inadequate	5	5	3900	120	No	No	91	No	2	4	2	5.9	127	75	5.8	2.1	1.31	3.56	Healthy	Impaired fasting glucose
1674	101.279	1_Johor	SMK BANDAR MAHARANI	54	Female	Chinese	Degree	Married	No	0	2	Inadequate	5	6	5118	180	No	No	69.5	Abdominal obese	8	6	18	4.5	121	68	7.5	1.2		4.26	Healthy	Healthy
1675	101.279	1_Johor	SMK BANDAR MAHARANI	57	Female	Malay	Degree	Married	Yes	0	0	Inadequate	6	5	396	300	No	No	89	No	4	12	14	5.2	157	85	5.4	0.9	1.94	3.1	Healthy	Healthy
1676	101.279	1_Johor	SMK BANDAR MAHARANI	45	Female	Malay									0				105	No				4.5	119	62	5.9	1.4	1.29	3.97	Healthy	Healthy
1677	101.279	1_Johor	SMK BANDAR MAHARANI	41	Female	Malay		Married	Yes	0	1	Inadequate	6	6	480	180	No	No	68.5	Abdominal obese	18	16	18	4.9	104	67	5	0.8	1.93	2.71	Healthy	Healthy
1678	101.279	1_Johor	SMK BANDAR MAHARANI	42	Male	Malay	Degree	Married	Yes	0	0	Inadequate	6	6	5652	120	Yes	No	79	Abdominal obese	28	28	28	4.4	142	92	7.9	2.9	1.46	5.06	Healthy	Healthy
1679	101.279	1_Johor	SMK BANDAR MAHARANI	46	Male	Malay	Degree	Married	Yes	1	1	Inadequate	7	7	2880	90	No	No	87	Abdominal obese	0	0	2	14.4	127	83	6.5		1.28	3.3	T2DM
1680	101.279	1_Johor	SMK BANDAR MAHARANI	47	Female	Indian	Master and above	Married	Yes	1	1	Inadequate	5	6	1200				72	Abdominal obese				4.8	130	70	5.3	1	1.05	3.85	Healthy	Healthy
1681	43.345	1_Johor	SMK TAN SRI OSMAN MOHD SA'AT	35	Female	Malay	Degree	Married	No	1	1	Inadequate	6	6	4638	180	No	No	65	Abdominal obese	0	2	8	4.6	114	72	4	0.5	1.8	1.97	Healthy	Healthy
1682	43.345	1_Johor	SMK TAN SRI OSMAN MOHD SA'AT	54	Female	Malay	Degree	Married	No	2	2	Inadequate	5	6	1314	60	No	No	72	Abdominal obese	0	0	2	5.1	126	84	4.5	0.6	1.5	2.73	Healthy	Healthy
1683	43.345	1_Johor	SMK TAN SRI OSMAN MOHD SA'AT	50	Male	Malay	Degree	Married	Yes	1	1	Inadequate	5	6	0	720	Yes	No	103	No	2	4	4	5.8	128	95	7.3	1.5	1.2	5.42	Healthy	Impaired fasting glucose
1684	43.345	1_Johor	SMK TAN SRI OSMAN MOHD SA'AT	42	Female	Malay	Degree	Married	No	0			6	7	1080		No	No	84	No	0	0	4	4.7	154	93	6.2	1.4	1.5	4.06	Healthy	Healthy
1685	43.345	1_Johor	SMK TAN SRI OSMAN MOHD SA'AT	42	Female	Malay	Degree	Married	No	0	1	Inadequate	8	8	0		No	No	79	Abdominal obese	0	0	4	5.4	135	91	5	1.2	0.9	3.56	Healthy	Healthy
1686	43.345	1_Johor	SMK TAN SRI OSMAN MOHD SA'AT	35	Female	Malay	Degree	Married	Yes	0	1	Inadequate	8	8	0		No	No	68	Abdominal obese	0	0	4	4.8	98	65	4.8	0.5	1.4	3.17	Healthy	Healthy
1687	43.345	1_Johor	SMK TAN SRI OSMAN MOHD SA'AT	48	Male	Malay	Secondary	Married	Yes	0	1	Inadequate	6	7	5902	40	Yes	No	94	No	0	6	4	4.6	135	85	5.2	1.2	1.2	3.46	Healthy	Healthy
1688	43.345	1_Johor	SMK TAN SRI OSMAN MOHD SA'AT	46	Female	Malay	Degree	Married	No	1			7	7	240		No	No	90	No	24	20	22	6.1	133	77	4.4	1.2	1.3	2.56	Undiagnosed T2DM
1689	43.345	1_Johor	SMK TAN SRI OSMAN MOHD SA'AT	31	Male	Malay	Master and above	Married	Yes	0	1	Inadequate	7	8	1095	30	No	No	99	No	0	4	4	4.4	123	82	6.4		1.2	3.75	Healthy	Healthy
1690	43.345	1_Johor	SMK TAN SRI OSMAN MOHD SA'AT	31	Male	Indian	Degree	Married	Yes	0	1	Inadequate	4	6	480	120	No	No	109	No	2	2	4	5.8	128	72	5	1.1	1	3.5	Healthy	Impaired fasting glucose
1691	43.345	1_Johor	SMK TAN SRI OSMAN MOHD SA'AT	46	Female	Malay	Degree	Married	Yes	1			5	7	4158	60	No	No	84	No	16	10	16	5.1	108	67	4.8	1	1.3	3.05	Healthy	Healthy
1692	43.345	1_Johor	SMK TAN SRI OSMAN MOHD SA'AT	35	Female	Malay	Degree	Married	Yes	1	1	Inadequate	6	7	1306.5	180	No	No	78	Abdominal obese	4	8	16	4.5	132	86	5.9	0.6	1.4	4.23	Healthy	Healthy
1693	43.345	1_Johor	SMK TAN SRI OSMAN MOHD SA'AT	32	Male	Malay	Degree	Married	No	1	2	Inadequate	6	8	0		No	No	93	No	12	10	14	5.1	131	78	6.1	1	1.4	4.25	Healthy	Healthy
1694	43.345	1_Johor	SMK TAN SRI OSMAN MOHD SA'AT	33	Female	Malay	Degree	Divorced	No	1			6	7	200	30	No	No	76	Abdominal obese	2	0	2	5.5	125	78	5.2	0.6	1.5	3.43	Healthy	Healthy
1695	43.345	1_Johor	SMK TAN SRI OSMAN MOHD SA'AT	43	Male	Malay	Degree	Married	No	1	1	Inadequate	4	6	3630	120	Yes	No	112	No	2	2	0	5.1	161	89	6	1.1	1.2	4.3	Healthy	Healthy
1696	43.345	1_Johor	SMK TAN SRI OSMAN MOHD SA'AT	33	Male	Malay	Degree	Married	No	4	1	Inadequate	6	6	9258	540	No	No	97	No	0	2	0	5.6	127	81	7.4	1.9	1.2	5.34	Healthy	Impaired fasting glucose
1697	43.345	1_Johor	SMK TAN SRI OSMAN MOHD SA'AT	49	Male	Malay	Degree	Married	No	1	2	Inadequate	6	6	1440		No	No	87	Abdominal obese	8	2	6	4.7	125	76	5.1	2	1	3.19	Healthy	Healthy
1698	43.345	1_Johor	SMK TAN SRI OSMAN MOHD SA'AT	49	Male	Malay	Degree	Married	Yes	1	1	Inadequate	4	6	4536	120	No	No	90	No	14	28	24	4.9	149	90	6.2	1.6	1.6	3.87	Healthy	Healthy
1699	43.345	1_Johor	SMK TAN SRI OSMAN MOHD SA'AT	32	Female	Malay	Degree	Married	No	1	1	Inadequate	7	8	0		No	No	66	Abdominal obese	0	6	6	4.4	114	81	5.7	0.5	2	3.47	Healthy	Healthy
1700	43.345	1_Johor	SMK TAN SRI OSMAN MOHD SA'AT	38	Female	Malay	Degree	Married	No	1	0	Inadequate	5	5	0		No	No	95	No	2	10	16	4.9	133	84	4.4	0.8	1.8	2.24	Healthy	Healthy
1701	43.345	1_Johor	SMK TAN SRI OSMAN MOHD SA'AT	30	Female	Malay	Degree	Single	Yes	0	1	Inadequate	4	6	1170	20	No	No	70	Abdominal obese	28	28	30	4.9	114	60	5.3	0.7	1.6	3.38	Healthy	Healthy
1702	43.345	1_Johor	SMK TAN SRI OSMAN MOHD SA'AT	36	Female	Malay	Degree	Divorced	No	0	1	Inadequate	8	8	471	180	No	No	64	Abdominal obese	14	6	12	4.9	116	73	5.4	0.6	1.9	3.23	Healthy	Healthy
1703	43.345	1_Johor	SMK TAN SRI OSMAN MOHD SA'AT	33	Female	Chinese	Degree	Married	No	1	1	Inadequate	6	7	546		No	No	77	Abdominal obese	12	8	14	4.7	111	71	5.2	0.9	1.4	3.39	Healthy	Healthy
1704	43.345	1_Johor	SMK TAN SRI OSMAN MOHD SA'AT	34	Female	Malay	Degree	Married	No	0	2	Inadequate	6	8	480	120	No	No	70	Abdominal obese	0	2	6	5	115	73	4.1	0.6	1.6	2.23	Healthy	Healthy
1705	43.345	1_Johor	SMK TAN SRI OSMAN MOHD SA'AT	37	Female	Malay	Secondary	Married	No	1			5	5	960		No	No	87	No	0	10	6	4.6	147	93	4.7	0.7	1.5	2.88	Healthy	Healthy
1706	43.345	1_Johor	SMK TAN SRI OSMAN MOHD SA'AT	35	Female	Malay	Degree	Married	No	0	1	Inadequate	6	7	5598	120	No	No	70	Abdominal obese	8	4	8	5.4	107	64	4.8	0.6	1.2	3.33	Healthy	Healthy
1707	43.345	1_Johor	SMK TAN SRI OSMAN MOHD SA'AT	39	Female	Malay	Degree	Married	Yes	0	1	Inadequate	5	7	1440	120	No	No	91	No	4	4	8	4.9	121	86	5.1		1.2	2.17	Healthy	Healthy
1708	43.345	1_Johor	SMK TAN SRI OSMAN MOHD SA'AT	26	Female	Malay	Degree	Single	Yes	1	2	Inadequate	5	6	769.5	60	No	No	80	No	4	4	6	5	119	86	4.4	0.6	1.2	2.93	Healthy	Healthy
1709	43.345	1_Johor	SMK TAN SRI OSMAN MOHD SA'AT	29	Male	Malay	Degree	Married	Yes	0	1	Inadequate	4	6	1794	840	Yes	No	90	No	6	16	12	5.4	132	75	6.3	1.6	1	4.57	Healthy	Healthy
1710	43.345	1_Johor	SMK TAN SRI OSMAN MOHD SA'AT	31	Male	Malay									0				70	Abdominal obese				4.9	136	71	5.7	1.1	1.7	3.5	Healthy	Healthy
1711	43.345	1_Johor	SMK TAN SRI OSMAN MOHD SA'AT	30	Male	Malay	Degree	Married	No	1	1	Inadequate	6	6	720		No	No	98	No	4	12	18	4.5	122	78	5.3	1.2	1.4	3.36	Healthy	Healthy
1712	43.345	1_Johor	SMK TAN SRI OSMAN MOHD SA'AT	35	Female	Malay	Degree	Married	No	1	2	Inadequate	6	7	306		No	No	67	Abdominal obese	4	12	8	4.5	113	79	5.1	0.7	1.8	2.98	Healthy	Healthy
1713	43.345	1_Johor	SMK TAN SRI OSMAN MOHD SA'AT	32	Female	Malay	Degree	Married	No	0	1	Inadequate	5	7	0	240	No	No	72	Abdominal obese	2	4	12	5	108	76	4.6	0.8	1.3	2.94	Healthy	Healthy
1714	43.345	1_Johor	SMK TAN SRI OSMAN MOHD SA'AT	48	Male	Malay									0				109	No				4.7	139	92	5.5	0.9	1.1	3.99	Healthy	Healthy
1715	43.345	1_Johor	SMK TAN SRI OSMAN MOHD SA'AT	32	Female	Malay	Master and above	Married	Yes	1	1	Inadequate	5	6	0		No	No	95	No	2	8	10	5.3	125	85	4.1	1	1	2.65	Healthy	Healthy
1716	43.345	1_Johor	SMK TAN SRI OSMAN MOHD SA'AT	40	Female	Malay	Degree	Married	Yes	1	1	Inadequate	6	6	120		No	No	79	Abdominal obese	8	4	14	4.6	106	68	4.4	1	1.1	2.85	Healthy	Healthy
1717	43.345	1_Johor	SMK TAN SRI OSMAN MOHD SA'AT	32	Female	Malay									0				73	Abdominal obese				4.9	113	75	6	0.9	1.7	3.89	Healthy	Healthy
1718	42.778	1_Johor	SMK PARIT BUNGA	50	Female	Malay	Degree	Married	Yes	1	1	Inadequate	7	7	693		No	No	101.5	No	4	2	4	7.8	120	68	5.1	2.4	1.2	2.81	T2DM
1719	42.778	1_Johor	SMK PARIT BUNGA	40	Female	Malay	Degree	Married	Yes	1	1	Inadequate	6	8	960		No	No	106.2	No	0	4	4	4.4	129	79	3.9	0.9	1.2	2.29	Healthy	Healthy
1720	42.778	1_Johor	SMK PARIT BUNGA	46	Female	Chinese	Degree	Single	Yes	1	1	Inadequate	9	9	5062.5	120		No	77.2	Abdominal obese	6	4	10	4.7	125	71	7	1.1	1.8	4.7	Healthy	Healthy
1721	42.778	1_Johor	SMK PARIT BUNGA	48	Male	Malay	Degree	Married	Yes	1	1	Inadequate	5	5	1026	60	No	No	75.9	Abdominal obese	0	0	0	5.2	113	64	4.9	0.9	1.7	2.79	Healthy	Healthy
1722	42.778	1_Johor	SMK PARIT BUNGA	42	Female	Malay	Degree	Married	No	1	2	Inadequate	5	6	2622	120	No	No	72.1	Abdominal obese	18	10	14	5.2	120	71	4.4	0.4	2.1	2.12	Healthy	Healthy
1723	42.778	1_Johor	SMK PARIT BUNGA	44	Female	Malay	Degree	Married	Yes	1	1	Inadequate	6	7	480	120	No	No	73.4	Abdominal obese	2	4	6	5.2	111		4.6	1	1.5	2.65	Healthy	Healthy
1724	42.778	1_Johor	SMK PARIT BUNGA	41	Female	Malay	Degree	Married	No	1	1	Inadequate	6	7	1356	120	No	No	78.8	Abdominal obese	2	8	6	5.2	149	87	5.9	0.7		2.98	Healthy	Healthy
1725	42.778	1_Johor	SMK PARIT BUNGA	51	Male	Malay	Degree	Married	Yes	1			6	7	7038	240	No	No	97	No	0	2	0	6.4	126	71	4.6	0.9	1.1	3.09	Undiagnosed T2DM
1726	42.778	1_Johor	SMK PARIT BUNGA	28	Female	Malay									0				61	Abdominal obese				5	108	65	4	0.8	1.3	2.34	Healthy	Healthy
1727	42.778	1_Johor	SMK PARIT BUNGA	34	Female	Malay	Degree	Single	Yes	1	1	Inadequate	5	5	0		No	No	107.1	No	0	0	0	6.4	142	93	6.7	1.4	1.2	4.86	Undiagnosed T2DM
1728	42.778	1_Johor	SMK PARIT BUNGA	34	Female	Malay	Degree	Married		1	1	Inadequate	6	7	3666		No	No	74.1	Abdominal obese	6	6	12	4.9	108	67	4.6	0.5	1.6	2.77	Healthy	Healthy
1729	42.778	1_Johor	SMK PARIT BUNGA	51	Male	Chinese	Degree	Married	Yes	1	1	Inadequate	8	9	120	120	No	No	92	No	2	6	8	5.3	138	87	5.7	1.3	1.1	4.01	Healthy	Healthy
1730	42.778	1_Johor	SMK PARIT BUNGA	30	Female	Malay	Degree	Married	No	0	2	Inadequate	5	6	0		No	No	72.5	Abdominal obese	0	16	16	4.7	116	73	5.2	1.7	1.6	2.83	Healthy	Healthy
1731	42.778	1_Johor	SMK PARIT BUNGA	40	Female	Malay	Degree	Married	No	0	1	Inadequate	8	8	8514	180	No	No	70	Abdominal obese	6	10	12	5.3	127	77	4.7	2.2	1.2	2.5	Healthy	Healthy
1732	42.778	1_Johor	SMK PARIT BUNGA	45	Female	Malay									0				72	Abdominal obese				4.6	110	67	5.1	0.8	1.8	2.94	Healthy	Healthy
1733	42.778	1_Johor	SMK PARIT BUNGA	40	Female	Malay	Diploma	Married	Yes	0	1	Inadequate	5	6	1713	360	No	No	74.7	Abdominal obese	6	6	8	4.5	109	61	4.8	1.2	1.3	2.96	Healthy	Healthy
1734	42.778	1_Johor	SMK PARIT BUNGA	51	Female	Malay	Degree	Married	Yes	0	1	Inadequate	4	4	0		No	No	72	Abdominal obese	10	12	18	4.4	117	65	5.5	1.1	1.9	3.1	Healthy	Healthy
1735	42.778	1_Johor	SMK PARIT BUNGA	39	Female	Malay	Degree	Married	No	0	0	Inadequate	7	8	1245	60	No	No	78.1	Abdominal obese	2	8	6	4.9	95		4.6	0.7	1.5	2.78	Healthy	Healthy
1736	42.778	1_Johor	SMK PARIT BUNGA	28	Female	Chinese	Degree	Married	No				7	8	1824	120	No	No	71	Abdominal obese	8	10	12	4.7	118	60	4.3	0.5	1.4	2.67	Healthy	Healthy
1737	42.778	1_Johor	SMK PARIT BUNGA	56	Female	Malay									0				80	No				4.3	163	81	7.4	0.8	2.1	4.94	Healthy	Healthy
1738	42.778	1_Johor	SMK PARIT BUNGA	40	Female	Malay	Degree	Single	No	1	0	Inadequate	6	6	480		No	No	91	No	4	2	4	4.7	154	89	4.9	1.4	1.2	3.06	Healthy	Healthy
1739	42.778	1_Johor	SMK PARIT BUNGA	48	Female	Malay									0				83	No				4.3	117	83	5.8	0.8	1.7	3.74	Healthy	Healthy
1740	42.778	1_Johor	SMK PARIT BUNGA	32	Female	Malay	Degree	Married	Yes	0	1	Inadequate	5	5	4158	120	No	No	70	Abdominal obese	0	4	2	4.7	112	71	4.2	0.6	1.6	2.33	Healthy	Healthy
1741	42.778	1_Johor	SMK PARIT BUNGA	31	Female	Malay	Degree	Married	Yes	1	2	Inadequate	7	8	0	60	No	No	88	No	4	6	4	4.5	123	76	6.3	2.3	1.4	3.86	Healthy	Healthy
1742	42.778	1_Johor	SMK PARIT BUNGA	44	Female	Malay	Degree	Married	No	1	1	Inadequate	5	6	0	420	No	No	74.1	Abdominal obese	10	8	14	4.2	101	60	5	0.9	1.5	3.09	Healthy	Healthy
1743	42.778	1_Johor	SMK PARIT BUNGA	32	Female	Malay	Degree	Married	No	0			6	7	5598	180	No	No			0	2	2	4.4	124	74	4.4	1	1.4	2.55	Healthy	Healthy
1744	42.778	1_Johor	SMK PARIT BUNGA	32	Female	Malay	Degree	Married	No	1	1	Inadequate	6	5	9438	120	No	No	62	Abdominal obese	14	16	18	4.2	98		6.6	0.8	1.8	4.44	Healthy	Healthy
1745	72	1_Johor	SMK PAI CHEE	36	Female	Malay	Degree	Married	No	1	2	Inadequate	6	6	2796		No	No	63	Abdominal obese	0	2	6	4.6	95	60	5.4	0.9	2.15	2.86	Healthy	Healthy
1746	72	1_Johor	SMK PAI CHEE	54	Female	Malay	Diploma	Married		1	2	Inadequate	4	6	960		No	No	97	No	10	10	10	5.2	137	64	4.3	1.6	1.24	2.3	Healthy	Healthy
1747	72	1_Johor	SMK PAI CHEE	34	Female	Malay	Master and above	Married	No	0	1	Inadequate	8	9	628.5	300	No	No	72	Abdominal obese	0	2	4	4.5	105	65	4	0.9	1.03	2.62	Healthy	Healthy
1748	72	1_Johor	SMK PAI CHEE	29	Female	Malay	Degree	Single	Yes	1			6	8	3954	480	No	No	111	No	4	10	8	4.4	114	63	4.6	0.5	1.66	2.72	Healthy	Healthy
1749	72	1_Johor	SMK PAI CHEE	39	Female	Malay	Degree	Married	Yes	1	0	Inadequate	5	5	4878	360	No	No	88	No	4	2	2	4.8	115	73	4.5	0.3	1.14	2.75	Healthy	Healthy
1750	72	1_Johor	SMK PAI CHEE	33	Male	Malay	Degree	Married	No	0	1	Inadequate	5		3036	240	No	No	87	Abdominal obese	4	2	2	4.8	116	70	4.5	0.8	1.23	2.95	Healthy	Healthy
1751	72	1_Johor	SMK PAI CHEE	28	Female	Malay	Degree	Married	Yes	0	1	Inadequate	6	7	868.5	300	No	No	76.5	Abdominal obese	0	4	4	4.7	127	70	4.6	1	1.37	2.76	Healthy	Healthy
1752	72	1_Johor	SMK PAI CHEE	29	Male	Malay	Degree	Married	Yes	1	3	Inadequate	5	8	0		Yes	No	102	No	16	16	18	6.2	115	75	6.7	2.7	1.17	4.32	Undiagnosed T2DM
1753	72	1_Johor	SMK PAI CHEE	38	Female	Malay	Degree	Married	Yes	0	0	Inadequate	6	7	960	300		No	74	Abdominal obese	0	4	6	5.1	113	77	7.1	1.3	1.35	5.15	Healthy	Healthy
1754	72	1_Johor	SMK PAI CHEE	53	Male	Malay	Degree	Married	No	1	1	Inadequate	5	5	186	180	No	No	105	No	4	6	4	12.4	163	98	5.8	1.3	1.28	3.94	Undiagnosed T2DM
1755	72	1_Johor	SMK PAI CHEE	55	Male	Chinese	Degree	Married		1	1	Inadequate	7	8	0				79	Abdominal obese	12		14	5	155	94	5	1.6	1.24	3.03	Healthy	Healthy
1756	72	1_Johor	SMK PAI CHEE	33	Male	Malay	Degree	Married	Yes	1	1	Inadequate	5	8	967.5		No	No	91	No	4	14	12	5.1	136	88	5.1	2	1.12	3.1	Healthy	Healthy
1757	72	1_Johor	SMK PAI CHEE	55	Male	Chinese	Degree	Married	No	2	0	Inadequate	7	7	6453		No	Yes	97	No	0	6	2	5.9	167	74	4.8	0.9	1.56	2.81	Healthy	Impaired fasting glucose
1758	72	1_Johor	SMK PAI CHEE	35	Female	Malay	Degree	Married	Yes	0	2	Inadequate	5	6	739	120	No	No	84	No	0	2	6	4.6	124	69	6.4	1.8	1.27	4.28	Healthy	Healthy
1759	72	1_Johor	SMK PAI CHEE	54	Male	Malay	Diploma	Widowed	Yes	1	1	Inadequate			480		No	No	83	Abdominal obese	8	8	12	5.4	108	69	5.5	0.8	1	4.09	Healthy	Healthy
1760	72	1_Johor	SMK PAI CHEE	41	Female	Chinese	Degree	Married		1	0	Inadequate	6	8	0		No	No	87	No	4	4	4	4.6	124	73	5.2	0.8	1.49	3.34	Healthy	Healthy
1761	72	1_Johor	SMK PAI CHEE	30	Female	Malay									0				88	No				4.7	123	75	5.1	1.7	1.25	3.04	Healthy	Healthy
1762	72	1_Johor	SMK PAI CHEE	31	Female	Malay	Degree	Married	No	1	0	Inadequate	5	8	967.5		No	No			4	16	18	4.3	114	70	5.4	0.8	1.6	3.5	Healthy	Healthy
1763	72	1_Johor	SMK PAI CHEE	27	Female	Malay	Secondary	Married	No	1	3	Inadequate	6	7	11364			No	81	No	2	10	4	4.4	103	59	3.7	0.5	1.39	2.12	Healthy	Healthy
1764	785.566	1_Johor	SMK PERMAS JAYA	51	Female	Chinese	Degree	Married	No	1	7	Inadequate	5	7	1356	210	No	No	88	No	8	6	14	5.1	126	81	5.7	0.7	2	3.38	Healthy	Healthy
1765	785.566	1_Johor	SMK PERMAS JAYA	35	Female	Chinese	Master and above		No	1	2	Inadequate	7	9	360	480	No	No	70	Abdominal obese	10	4	12	4.2	106	60	3.7	0.5	1.2	2.27	Healthy	Healthy
1766	785.566	1_Johor	SMK PERMAS JAYA	51	Female	Chinese	Degree	Single	No	1	1	Inadequate	5	8	1188	120	No	No	90	No	0	18	6	5	136	69	5.4	1.4	1.6	3.16	Healthy	Healthy
1767	785.566	1_Johor	SMK PERMAS JAYA	45	Female	Malay	Degree	Married	Yes	0	1	Inadequate	4	4	0		No	No	93	No	14	14	16	5.9	114	70	6.5	1.4	1.2	4.66	Healthy	Impaired fasting glucose
1768	785.566	1_Johor	SMK PERMAS JAYA	40	Female	Malay									0				80	No				5	103	68	5.6	1.1	1.4	3.7	Healthy	Healthy
1769	785.566	1_Johor	SMK PERMAS JAYA	33	Male	Malay	Degree	Married	No	0	1	Inadequate	7	7	699		No	No	84	Abdominal obese	0	10	4	4.6	119	78		0.5	2		Healthy	Healthy
1770	785.566	1_Johor	SMK PERMAS JAYA	24	Female	Malay									0				101	No				5.3	103	71	4.8	0.9	1.2	3.19	Healthy	Healthy
1771	785.566	1_Johor	SMK PERMAS JAYA	25	Female	Chinese	Degree	Married	No	0	1	Inadequate	7	8	1518	100	No	No	71	Abdominal obese	8	2	4	4.9	106	76	4.6	0.7	1.6	2.68	Healthy	Healthy
1772	785.566	1_Johor	SMK PERMAS JAYA	43	Female	Malay									0				89	No				5.3	115	65	8.2	2.3	1.1		Healthy	Healthy
1773	785.566	1_Johor	SMK PERMAS JAYA	26	Female	Malay									0				71	Abdominal obese				5.2	116	74	4.8	0.6	1.5	3.03	Healthy	Healthy
1774	785.566	1_Johor	SMK PERMAS JAYA	55	Female	Malay									0				88	No				5.4	137	86	5.3	1.3	1.5	3.21	Healthy	Healthy
1775	48.125	1_Johor	SMK PEI HWA	49	Female	Malay	Diploma	Married	Yes	0	1	Inadequate	4	8	0		No	No	105.1	No	0	6	6	7.9	154	90	7.7	2.3	1.8	4.86	Undiagnosed T2DM
1776	48.125	1_Johor	SMK PEI HWA	45	Female	Chinese	Degree	Married	No	1	3	Inadequate	6	8	594	180	No	No	68.6	Abdominal obese	6	2	8	4.4	133	79	4.5	1.6			Healthy	Healthy
1777	48.125	1_Johor	SMK PEI HWA	53	Female	Malay	Degree	Married	Yes	10	1	Inadequate	6	6	4638	420	No	No	84	No	6	18	10	5.7	122	68	5.2	0.5	1.6	3.37	Healthy	Impaired fasting glucose
1778	48.125	1_Johor	SMK PEI HWA	49	Female	Malay	Degree	Married	Yes	1	1	Inadequate	6	7	2994	180	No	No	86	No	6	8	12	4.8	114	66	5.6	2.2	1.5	3.1	Healthy	Healthy
1779	48.125	1_Johor	SMK PEI HWA	47	Female	Malay	Degree	Widowed	Yes	1	1	Inadequate	5	5	2796	150		No	82.5	No	4	6	8	4.6	129	72	4.7	0.8	1.5	2.84	Healthy	Healthy
1780	48.125	1_Johor	SMK PEI HWA	31	Female	Malay	Degree	Married	Yes	0	1	Inadequate	8	6	1893	240	No	No	76.5	Abdominal obese	6	12	10	4.5	108	71	4.6	1.2	1	3.06	Healthy	Healthy
1781	48.125	1_Johor	SMK PEI HWA	48	Female	Malay	Degree	Married	Yes	1			6	8	339		No	No	89.5	No	22	8	16	5.5	144	70	5.1	0.8	1.4	3.34	Healthy	Healthy
1782	48.125	1_Johor	SMK PEI HWA	29	Female	Malay	Degree	Married	No	1	1	Inadequate	7	8	2031	90	No	No	65.1	Abdominal obese	4	8	8		114	68	4.1	0.3	1.5	2.46	Healthy	Healthy
1783	48.125	1_Johor	SMK PEI HWA	35	Female	Malay	Degree	Married		1	1	Inadequate			6615	270	No	No	81.1	No	8	10	14	5.7	129	81	5.4	1.2	1.5	3.36	Healthy	Impaired fasting glucose
1784	48.125	1_Johor	SMK PEI HWA	30	Female	Malay	Degree	Married	Yes				6	7	1288.5		No	No	66	Abdominal obese	4	14	6	4.1	107	66	4.6	0.6	1.9	2.43	Healthy	Healthy
1785	48.125	1_Johor	SMK PEI HWA	42	Female	Malay	Degree	Married	No	0	0	Inadequate	7	8	0		No	No	72	Abdominal obese	24	30	28	4.8	115	71	5	0.5	1.7	3.07	Healthy	Healthy
1786	48.125	1_Johor	SMK PEI HWA	57	Female	Chinese	Degree	Single	No	1	1	Inadequate	7	7	960		No	No	66.5	Abdominal obese	2	12	14	4.5	105	64	5.2	1.3	1.8	2.81	Healthy	Healthy
1787	48.125	1_Johor	SMK PEI HWA	48	Female	Chinese	Degree	Married	No	2	2	Inadequate	6	6	1182	30	No	Yes	77	Abdominal obese	28	18	28	4.7	122	83	5.4	1.8	1.5	3.08	Healthy	Healthy
1788	48.125	1_Johor	SMK PEI HWA	43	Female	Chinese	Degree	Married	Yes	1	1	Inadequate	6	8	1920	60	No	No	68	Abdominal obese	0	2	6	4.9	99	65	4.5	0.9	2	2.09	Healthy	Healthy
1789	48.125	1_Johor	SMK PEI HWA	49	Female	Chinese	Degree	Single	Yes	1	3	Inadequate	5	5	3078	240	No	No	92	No	2	4	4	8.4	133	86	3.6	0.9	1.1	2.09	Undiagnosed T2DM
1790	48.125	1_Johor	SMK PEI HWA	29	Female	Malay	Degree	Married	No	0	3	Inadequate	6	7	5386.5	60	No	No	66	Abdominal obese	6	12	12	4.4	116	70	3.6	0.4	1.6	1.82	Healthy	Healthy
1791	48.125	1_Johor	SMK PEI HWA	48	Female	Chinese	Degree	Single	Yes	1	7	Inadequate	5	6	1215	240	No	No	75	Abdominal obese	10	8	18	5.1	114	73	5.9	1.4	1.6	3.66	Healthy	Healthy
1792	48.125	1_Johor	SMK PEI HWA	36	Female	Malay	Degree	Married	No	0	1	Inadequate	6	8	1230	240	No	No	68	Abdominal obese	6	10	14	5.1	110	71	5.3	0.7	1.6	3.38	Healthy	Healthy
1793	48.125	1_Johor	SMK PEI HWA	26	Female	Malay	Degree	Married	Yes	0	1	Inadequate	8	9	6750	240	No	No	71.6	Abdominal obese	4	4	12	4.6	104	68	3.7	0.5	1.8	1.67	Healthy	Healthy
1794	48.125	1_Johor	SMK PEI HWA	44	Female	Malay	Degree	Married	Yes	3	2	Inadequate	5	7	4878	240	No	No	73	Abdominal obese	10	10	10	4.5	133	84	5.7	1.2	2	3.16	Healthy	Healthy
1795	48.125	1_Johor	SMK PEI HWA	38	Female	Chinese	Degree	Married	No	2	1	Inadequate	7	8	930	30	No	No	76	Abdominal obese	0	4	4	4.4	115	75	5.6	1	1.4	3.75	Healthy	Healthy
1796	48.125	1_Johor	SMK PEI HWA	44	Female	Malay	Degree	Married	Yes	1	1	Inadequate	6	6	1893		No	No	86.5	No	0	0	2	5.6	129	77	5.3	0.6	1.4	3.63	Healthy	Impaired fasting glucose
1797	48.125	1_Johor	SMK PEI HWA	38	Female	Malay	Degree	Married	No	1	1	Inadequate	6	7	240		No	No	89.5	No	4	0	4	4.6	106	66	4.9	1	1.2	3.25	Healthy	Healthy
1798	48.125	1_Johor	SMK PEI HWA	48	Female	Malay	Degree	Married	Yes	1	7	Inadequate	5	5	1080			No	90.5	No	0	0	0	4.4	127	76		0.8	1	2.14	Healthy	Healthy
1799	48.125	1_Johor	SMK SERI PINANG	41	Male	Malay	Degree	Married	Yes	0	1	Inadequate	6	6	0	120	No	No	84	Abdominal obese	4	6	10	4.9	118	81	6	0.9	1.56	4.03	Healthy	Healthy
1800	48.125	1_Johor	SMK SERI PINANG	35	Female	Malay	Degree	Married	Yes	0	0	Inadequate	6	7	1055	60	No	No	71	Abdominal obese	4	10	14	4.5	133	79	5.4	0.7	1.32	3.78	Healthy	Healthy
1801	48.125	1_Johor	SMK SERI PINANG	37	Female	Malay	Master and above	Married	Yes	0	0	Inadequate	5	6	405	180	No	No	66	Abdominal obese	4	8	6	4.7	114	76	5.5	1	1.41	3.59	Healthy	Healthy
1802	48.125	1_Johor	SMK SERI PINANG	43	Female	Malay	Degree	Married	No	2	1	Inadequate	6	6	5130			No	69	Abdominal obese	4	4	8	4.3	138	87	4.6	1.1	1.46	2.65	Healthy	Healthy
1803	48.125	1_Johor	SMK SERI PINANG	33	Female	Malay	Degree	Married	Yes	1	1	Inadequate	6	8	0	300	No	No	87	No	0	6	6	15.1	108	70	5.4	1.2	1.29	3.61	Undiagnosed T2DM
1804	48.125	1_Johor	SMK SERI PINANG	38	Female	Malay									0				71	Abdominal obese				4.8	119	78	5.2	0.5	1.88	3.04	Healthy	Healthy
1805	48.125	1_Johor	SMK SERI PINANG	31	Female	Malay	Degree	Married	Yes	1	1	Inadequate	7	7	1582	60	No	No	70	Abdominal obese	6	8	6	4.2	118	70	5.1	0.7	1.5	3.32	Healthy	Healthy
1806	48.125	1_Johor	SMK SERI PINANG	27	Female	Malay	Degree	Married	No	1	1	Inadequate	7	8	360	120	No	No	61	Abdominal obese	2	6	2	4.1	111	65	4.9	0.8	1.49	3.06	Healthy	Healthy
1807	48.125	1_Johor	SMK SERI PINANG	31	Female	Malay	Degree	Married	Yes	0			6	6	318	60	No	No	88	No	4	4	6	4.1	113	68	4	1	1.27	2.25	Healthy	Healthy
1808	48.125	1_Johor	SMK SERI PINANG	38	Female	Malay	Degree	Married	Yes	1	4	Inadequate	6	7	2910	120	No	No	77	Abdominal obese	0	6	2	4.8	122	80	3.7	0.7	1.36	2	Healthy	Healthy
1809	48.125	1_Johor	SMK SERI PINANG	53	Female	Malay	Degree	Married	Yes	2			4	6	3288	90	No	No	76	Abdominal obese	2	10	12		126	83	6.7	1.8	1.19	4.68	T2DM
1810	48.125	1_Johor	SMK SERI PINANG	41	Female	Malay	Degree	Married	Yes	1	1	Inadequate	6	6	0	30	No	No	69	Abdominal obese	4	6	6	4.9	138	80	3.7	0.5	1.47	2.06	Healthy	Healthy
1811	48.125	1_Johor	SMK SERI PINANG	33	Female	Malay	Degree	Married	Yes	0	1	Inadequate	5	6	2415	60	No	No	67	Abdominal obese	4	14	12	4.3	103		4.5	0.4	1.86	2.5	Healthy	Healthy
1812	48.125	1_Johor	SMK SERI PINANG	40	Female	Malay									0				76	Abdominal obese				5.1	122	77	6	0.5	1.79	4.02	Healthy	Healthy
1813	48.125	1_Johor	SMK SERI PINANG	36	Female	Malay	Degree	Married	Yes				8	9	231	60	No	No	73	Abdominal obese	12	14	16	4.6	116	75	4.3	0.6	1.19	2.87	Healthy	Healthy
1814	123.368	1_Johor	SMK PEKAN NENAS	37	Female	Malay	Degree	Married	No	0	1	Inadequate	7	8	720		No	No	71	Abdominal obese	6	18	14	4.8	128	77	5.2	0.7	1.84	3.04	Healthy	Healthy
1815	123.368	1_Johor	SMK PEKAN NENAS	33	Female	Malay	Degree	Married	Yes	1	2	Inadequate	8	8	5865		No	No	71	Abdominal obese	0	4	8	4.9	142	96	4.2	0.4	1.64	2.38	Healthy	Healthy
1816	123.368	1_Johor	SMK PEKAN NENAS	27	Female	Malay	Degree	Married	Yes	1	1	Inadequate	6	6	231	180	No	No	62	Abdominal obese	14	14	12	4.4	114	73	4.2	0.4	1.8	2.22	Healthy	Healthy
1817	123.368	1_Johor	SMK PEKAN NENAS	45	Female	Malay	Degree	Married	Yes	1	1	Inadequate	5	6	912	480	No	No	83	No	22	20	24	4.7	143	90	5.5		1.15		Healthy	Healthy
1818	123.368	1_Johor	SMK PEKAN NENAS	43	Male	Malay									0				106	No				4.6	155	102	5.6	1.2	1.13	3.93	Healthy	Healthy
1819	123.368	1_Johor	SMK PEKAN NENAS	61	Male	Chinese	Degree	Married	Yes	1	1	Inadequate	8	8	1519.5	360	No	No	79	Abdominal obese	16	10	20	4.7	130	76	5.1	1.5	1.78	2.64	Healthy	Healthy
1820	123.368	1_Johor	SMK PEKAN NENAS	47	Male	Malay	Master and above	Married	No	4	7	Adequate	6	6	798		No	No	86	Abdominal obese	4	8	4	5.7	152	78	7.5	2.3	1.35	5.11	Healthy	Impaired fasting glucose
1821	123.368	1_Johor	SMK PEKAN NENAS	28	Female	Malay									0				96	No				4.7	132	83	6.7		1.46	3.6	Healthy	Healthy
1822	123.368	1_Johor	SMK PEKAN NENAS	42	Female	Malay	Degree	Married	No	1			5	6	2079		No	No	80	No	4	18	14	5.8	165	108	5.4	3	1.07	2.97	Healthy	Impaired fasting glucose
1823	123.368	1_Johor	SMK PEKAN NENAS	29	Female	Chinese	Degree	Single	No	1	1	Inadequate	6	8	5598	240	No	Yes	69	Abdominal obese	0	2	4		111	71	6.7	0.6	1.81	4.62	Healthy	Healthy
1824	123.368	1_Johor	SMK PEKAN NENAS	43	Male	Malay	Degree	Married	No	1	2	Inadequate	6	6	2148	900	Yes	No	81	Abdominal obese	4	10	14	4.7	132	88	5.3	0.9	1.13	3.76	Healthy	Healthy
1825	123.368	1_Johor	SMK PEKAN NENAS	28	Female	Malay	Degree	Married	Yes	1	2	Inadequate	6	7	810	60	No	No	74	Abdominal obese	2	4	4	4.7	117	84	5.3	0.7	1.66	3.32	Healthy	Healthy
1826	123.368	1_Johor	SMK PEKAN NENAS	29	Female	Malay	Degree	Married	No	0	2	Inadequate	8	8	652.5	30	No	No	93	No	0	2	10	5.2	142	91	5.8	1	1.11	4.24	Healthy	Healthy
1827	105	1_Johor	SMK PESISIRAN PERDANA	45	Female	Chinese	Degree	Married	No	2	1	Inadequate	7	9	2148	120	No	No	74.5	Abdominal obese	12	18	22	5.4	118	77	6.2	1.3	1.6	4.01	Healthy	Healthy
1828	105	1_Johor	SMK PESISIRAN PERDANA	28	Female	Malay	Degree	Married	No	1	1	Inadequate	5	6	480		No	No	73	Abdominal obese	8	14	16	4.3	97	61	4.9	0.6	1.9	2.73	Healthy	Healthy
1829	105	1_Johor	SMK PESISIRAN PERDANA	35	Male	Malay									0				90	No				5.5	120	73	7		1.3	4.29	Healthy	Healthy
1830	105	1_Johor	SMK PESISIRAN PERDANA	38	Male	Malay									0				104	No				4.2	131	83	6	1.5	1.1	4.22	Healthy	Healthy
1831	105	1_Johor	SMK PESISIRAN PERDANA	32	Male	Malay									0				102	No				4.9	136	87	3.8	2	1	1.89	Healthy	Healthy
1832	105	1_Johor	SMK PESISIRAN PERDANA	55	Male	Malay	Master and above	Married	Yes	1	7	Inadequate	5	5	990	60		No	83	Abdominal obese	0	0	0	5.3	120	72	6.6		1.2	3.81	Healthy	Healthy
1833	105	1_Johor	SMK PESISIRAN PERDANA	42	Female	Malay	Degree		Yes	0	3	Inadequate	7	7	7518	60	No	No	92	No	2	2	0	5.8	140	92	4.7	1.3	1.1	3.01	Healthy	Impaired fasting glucose
1834	105	1_Johor	SMK PESISIRAN PERDANA	47	Female	Malay	Degree	Married	No	1	1	Inadequate	7	8	0		No	No	67	Abdominal obese	0	4	2	5	110	64	6.1	1.2	2.3	3.26	Healthy	Healthy
1835	105	1_Johor	SMK PESISIRAN PERDANA	56	Male	Malay	Degree	Married	No	0	1	Inadequate	6	6	4398	180	Yes	No	96	No	18	12	16	8	150	101	5.9	2.6	1.2	3.52	T2DM
1836	105	1_Johor	SMK PESISIRAN PERDANA	27	Female	Malay	Degree	Married	No				6	6	0		No	No	109	No	4	6	10	4.3	133	77	4.5	2.2	1	2.5	Healthy	Healthy
1837	105	1_Johor	SMK PESISIRAN PERDANA	56	Male	Malay	Degree	Married	No	1	7	Inadequate	6	5	0		Yes	No	83	Abdominal obese	0	2	2	5.3	129	80	3.9	1.4	1.1	2.16	Healthy	Healthy
1838	200.239	1_Johor	SMK SERI PERDANA	23	Female	Malay	Degree	Single	Yes	0	0	Inadequate	6	6	300		No	No	72	Abdominal obese	2	10	6	4.4	117	84	4.1	0.5	1.7	2.17	Healthy	Healthy
1839	200.239	1_Johor	SMK SERI PERDANA	27	Female	Malay	Degree	Married	No		1		6	7	2838	120	No	No	73	Abdominal obese	2	12	8	4.8	113	70	5.6	0.7	1.7	3.58	Healthy	Healthy
1840	200.239	1_Johor	SMK SERI PERDANA	32	Female	Malay	Degree	Married	No	0	0	Inadequate	7	7	1365	60	No	No	75	Abdominal obese	12	20	20	4.6	114	71	6.3	0.8	1.5	4.44	Healthy	Healthy
1841	200.239	1_Johor	SMK SERI PERDANA	41	Female	Malay									0				74	Abdominal obese				4.8	124	65	5.8	0.6	1.7	3.83	Healthy	Healthy
1842	200.239	1_Johor	SMK SERI PERDANA	55	Male	Malay									0				99	No				5.5	131	89	4.7	1	1.1	3.15	Healthy	Healthy
1843	200.239	1_Johor	SMK SERI PERDANA	45	Female	Malay	Degree	Married	Yes	0	2	Inadequate	6	8	1365	120	No	No	79	Abdominal obese	12	14	10	4.8	113	63	7	1	1.6	4.95	T2DM
1844	200.239	1_Johor	SMK SERI PERDANA	44	Female	Malay									0				76	Abdominal obese				4.7	146	93	6.1	1	1.7	3.95	Healthy	Healthy
1846	200.239	1_Johor	SMK SERI PERDANA	51	Male	Malay	Degree	Married	Yes				6	5	9918	480	No	No	93	No	4	10	8	6.7	115	76	4.6	1.5	1.4	2.52	T2DM
1847	200.239	1_Johor	SMK SERI PERDANA	33	Female	Malay	Degree	Married	Yes		2		6	5	2866.5	30	No	No	87	No	20	28	24	4.4	110	75	5.4	1.4	1.3	3.46	Healthy	Healthy
1848	200.239	1_Johor	SMK SERI PERDANA	44	Male	Malay	Degree	Married	Yes	0	0	Inadequate	6	6	405		No	No	95	No	4	4	4	5.1	141	81	6.1	2.8	1.1	3.73	Healthy	Healthy
1849	200.239	1_Johor	SMK SERI PERDANA	32	Female	Indian									0				70	Abdominal obese				4.6	94	61	3.7	0.6	1.2	2.23	Healthy	Healthy
1850	200.239	1_Johor	SMK SERI PERDANA	30	Male	Malay	Degree	Married	No	0	0	Inadequate			1173	720		No	102	No				4.6	141	86	4.9	1.5	1	3.22	Healthy	Healthy
1851	200.239	1_Johor	SMK SERI PERDANA	56	Female	Malay	Degree	Married	Yes	1	1	Inadequate	6	6	2106	120	No	No	84	No	0	0	0	9.5	145	70	4.3	0.5	1.6	2.47	Undiagnosed T2DM
1852	200.239	1_Johor	SMK SERI PERDANA	47	Female	Malay	Degree	Married	No	3	0	Inadequate	6	7	0	5			70	Abdominal obese	4	10	12	4.7	129	68	5.4	0.5	1.5	3.67	Healthy	Healthy
1853	200.239	1_Johor	SMK SERI PERDANA	52	Male	Chinese	Degree	Married	No	2	1	Inadequate	6	7	3564		No	No	90	No	0	6	4	5.8	127	80	5.9	0.8	1.5	4.04	Healthy	Impaired fasting glucose
1854	200.239	1_Johor	SMK SERI PERDANA	34	Female	Malay	Degree	Married	No	0	1	Inadequate	8	8	426			No	62	Abdominal obese	2	6	2	4.9	105	68	4.7	0.5	1.9	2.57	Healthy	Healthy
1855	200.239	1_Johor	SMK SERI PERDANA	28	Female	Malay	Degree	Married	No	1	1	Inadequate			0		No	No	64	Abdominal obese	0	8	4	4.7	113	68	5.5	0.5		2.67	Healthy	Healthy
1856	200.239	1_Johor	SMK SERI PERDANA	51	Female	Malay	Degree	Married	No		7		4	6	5340	240	No	No	79	Abdominal obese	8	8	8	5.2	125	71	5.6	0.9	1.7	3.49	Healthy	Healthy
1857	321.841	1_Johor	SMK PENGHULU SAAT	45	Female	Malay	Degree	Married	Yes	1	1	Inadequate	6	7	1324	120	No	No	69	Abdominal obese	10	14	14	5.1	122	76	6.4	1.4	1.8	3.96	Healthy	Healthy
1858	321.841	1_Johor	SMK PENGHULU SAAT	36	Female	Malay	Degree	Married	No	1	5	Inadequate			0		No	No	81	No	6	4	12	4.2	133	74	3.9	0.5	1.2	2.47	Healthy	Healthy
1859	321.841	1_Johor	SMK PENGHULU SAAT	34	Female	Malay	Degree	Married	No	1	2	Inadequate	6	6	972	120	No	No	69	Abdominal obese	8	8	18	4.5	111	79	6.2	2.2	1.5	3.7	Healthy	Healthy
1860	321.841	1_Johor	SMK PENGHULU SAAT	46	Male	Malay	Degree	Married	No	1	1	Inadequate	4	5	1080	60	Yes	No	99	No	0	4	0	6.2	137	79	5	1.8	1.3	2.88	Undiagnosed T2DM
1861	321.841	1_Johor	SMK PENGHULU SAAT	44	Male	Malay	Degree	Married	No	0	2	Inadequate	6	7	2880		No	No	86.5	Abdominal obese	0	2	8	4.7	138	72	6.6	1.3	1.3	4.71	Healthy	Healthy
1862	321.841	1_Johor	SMK PENGHULU SAAT	40	Female	Malay	Degree	Married	Yes	3	0	Inadequate	5	6	448	30	No	No	89	No	2	8	8	5.2	132	83	5.4	0.8	1.6	3.44	Healthy	Healthy
1863	321.841	1_Johor	SMK PENGHULU SAAT	44	Female	Malay	Degree	Married	No	0	1	Inadequate			960	180	No	No	71	Abdominal obese	4	2	2	5.1	108	62	5	0.7	1.5	3.18	Healthy	Healthy
1864	321.841	1_Johor	SMK PENGHULU SAAT	51	Male	Malay	Degree	Married	Yes	1	7	Inadequate	5	5	0		No	No	88	Abdominal obese	2	8	4	4.8	146	88	5.2	1.2	1.3	3.36	Healthy	Healthy
1865	321.841	1_Johor	SMK PENGHULU SAAT	36	Female	Malay	Secondary	Married	Yes	1	1	Inadequate	7	7	586.5	10	No	No	72.5	Abdominal obese	8	6	10	4.3	112	67	5.6	1	1.7	3.45	Healthy	Healthy
1867	321.841	1_Johor	SMK PENGHULU SAAT	36	Female	Malay	Degree	Married	Yes	1	1	Inadequate			4815	30	No	No	76.2	Abdominal obese	2	2	4	4.5	116	76	6	2	1.6	3.49	Healthy	Healthy
1868	321.841	1_Johor	SMK PENGHULU SAAT	39	Female	Malay	Degree	Married	Yes	1				7	480		No	No	66	Abdominal obese	6	6	4	5	141	82	5.3	0.7	1.7	3.28	Healthy	Healthy
1869	321.841	1_Johor	SMK PENGHULU SAAT	44	Female	Malay	Degree	Married	Yes	1	2	Inadequate	5	5	120		No	No	75	Abdominal obese	10	16	14	5	155	96	5.7	1.1	1.8	3.4	T2DM
1870	254.154	1_Johor	SMK DATO PENGGAWA TIMUR	38	Female	Malay	Degree	Married	No	2	3	Adequate	5	5	1245	90	No	No	65	Abdominal obese	2	2	6	4.3	109	72	3.9	0.5	1.56	2.17	Healthy	Healthy
1871	254.154	1_Johor	SMK DATO PENGGAWA TIMUR	37	Female	Malay	Degree	Married	Yes	1	1	Inadequate	5	6	0		No	No	91	No	6	4	8	4.7	129	88	6	1.2	1.45	4.01	Healthy	Healthy
1872	254.154	1_Johor	SMK DATO PENGGAWA TIMUR	45	Female	Indian	Degree	Married	Yes	1	2	Inadequate	5	6	4506	180	No	Yes	95	No	2	8	8	4.9	146	97		0.8	1.52	1.63	Healthy	Healthy
1873	254.154	1_Johor	SMK DATO PENGGAWA TIMUR	41	Female	Malay	Degree	Married	No	0	0	Inadequate	6	7	198		No	No	63	Abdominal obese	4	10	6	4.5	103	63	3.6	0.7	1.63	1.61	Healthy	Healthy
1874	254.154	1_Johor	SMK DATO PENGGAWA TIMUR	32	Female	Malay	Master and above	Married	No	1	1	Inadequate	7	6	720	240	No	No	80	No	2	4	0	4.6	104	73	4.5	0.8	1.5	2.67	Healthy	Healthy
1875	254.154	1_Johor	SMK DATO PENGGAWA TIMUR	46	Female	Indian	Degree	Single	Yes	0	0	Inadequate	7	8	4410	240	No	No	64	Abdominal obese	10	14	22	4.9	126	80	6.9	1	1.82	4.66	Healthy	Healthy
1876	254.154	1_Johor	SMK DATO PENGGAWA TIMUR	50	Female	Chinese	Degree	Married	No	1	1	Inadequate	5	6	1422		No	No	79	Abdominal obese	14	14	14	5.8	130	82	5.3	0.8	1.44	3.47	Healthy	Impaired fasting glucose
1877	254.154	1_Johor	SMK DATO PENGGAWA TIMUR	48	Female	Chinese	Degree	Married	No	2	2	Inadequate	6	7	918	300	No	No	95	No	2	6	6	4.5	144	87	4.4	1.2	1.31	2.58	Healthy	Healthy
1878	254.154	1_Johor	SMK DATO PENGGAWA TIMUR	37	Female	Malay	Degree	Married	Yes	0	0	Inadequate	6	8	2760		No	No	88	No	2	4	4	4	115	73	5.7	1.6	1.92	3.11	Healthy	Healthy
1879	254.154	1_Johor	SMK DATO PENGGAWA TIMUR	26	Female	Malay	Degree	Single	No	0	1	Inadequate	4	6	0		No	No			10	20	20	4.5	102		4.3	0.8	1.7	2.26	Healthy	Healthy
1880	254.154	1_Johor	SMK DATO PENGGAWA TIMUR	49	Female	Malay	Degree	Married	No	1	1	Inadequate	7	8	2118		No	No	86	No	0	4	2	4.5	139	76	5.2	1.1	1.1	3.54	Healthy	Healthy
1881	254.154	1_Johor	SMK DATO PENGGAWA TIMUR	44	Female	Malay	Degree	Married	Yes	1	1	Inadequate	6	6	720	300	No	No	77	Abdominal obese	0	4	0	4.7	134	69	5.8	1	1.33	4.07	Healthy	Healthy
1882	254.154	1_Johor	SMK DATO PENGGAWA TIMUR	33	Female	Malay	Degree	Married	Yes	1	1	Inadequate	5	6	0		No	No	68	Abdominal obese	0	0	0	4.7	115	66	5.2	0.8	1.74	3.03	Healthy	Healthy
1883	254.154	1_Johor	SMK DATO PENGGAWA TIMUR	27	Female	Malay	Degree	Married	No	1	1	Inadequate	7	6	49.5		No	No	75	Abdominal obese	0	0	4	4.7	97		6	0.8	1.57	4.03	Healthy	Healthy
1884	254.154	1_Johor	SMK DATO PENGGAWA TIMUR	41	Female	Malay	Degree	Married	Yes	1	1	Inadequate	6	7	0	60	No	No	89	No	2	4	2	4.5	120	73	5.3	0.8	1.39	3.57	Healthy	Healthy
1885	254.154	1_Johor	SMK DATO PENGGAWA TIMUR	44	Female	Malay	Secondary	Married	No	1	1	Inadequate	5	6	960	180	No	No	84	No	6	8	8	5.3	157	92	6	1.3	1.01	4.38	Healthy	Healthy
1886	254.154	1_Johor	SMK DATO PENGGAWA TIMUR	34	Female	Malay	Degree	Married	Yes	3	7	Adequate	6	8	231	240	No	No	89	No	0	0	0	5	106	67	4.4	0.8	1.53	2.55	Healthy	Healthy
1887	254.154	1_Johor	SMK DATO PENGGAWA TIMUR	29	Female	Malay	Degree	Married	Yes	7	7	Adequate	7	7	918	300	No	No	106	No	2	0	4	4.7	116	71	4.3	0.7	0.94	3	Healthy	Healthy
1888	254.154	1_Johor	SMK DATO PENGGAWA TIMUR	48	Female	Indian	Degree	Married	No	1	2	Inadequate	5	7	7518	180	No	No	89	No	18	20	16	4.8	118	76		0.6	1.21		Healthy	Healthy
1889	254.154	1_Johor	SMK DATO PENGGAWA TIMUR	40	Female	Malay	Degree	Married	No	1	1	Inadequate	6	6	247.5	195	No	No	103	No	12	16	18	5.5	129	79	5.6	0.7	1.27	4.04	Healthy	Healthy
1890	254.154	1_Johor	SMK DATO PENGGAWA TIMUR	44	Female	Malay	Degree	Married	No				7	7	7518	60	No	No	68	Abdominal obese	2	4	2	4.9	106	67	5.3	0.9	1.99	2.86	Healthy	Healthy
1891	254.154	1_Johor	SMK DATO PENGGAWA TIMUR	27	Female	Malay	Degree	Married	Yes	0	1	Inadequate	5	5	720		No	No	80	No	10	10	8	4.7	108	61	4.6	0.5	1.79	2.62	Healthy	Healthy
1892	254.154	1_Johor	SMK DATO PENGGAWA TIMUR	53	Male	Malay	Degree	Married	No	1	2	Inadequate	6	7	6558	40	No	No	91	No	4	6	4	5	135	77	5.8	1.1	1.21	4.07	Healthy	Healthy
1893	158.523	1_Johor	SMK SIMPANG RENGAM	36	Female	Chinese	Degree	Married	No	0	3	Inadequate	5	6	967.5	150	No	Yes	78	Abdominal obese	2	10	10	4.7	127	79		1	1		Healthy	Healthy
1894	158.523	1_Johor	SMK SIMPANG RENGAM	50	Female	Other races	Degree	Married	No	1	2	Inadequate	7	8	0	150	No	No	77	Abdominal obese	2	4	6	10.6	124	82	6.8	2	1.6	4.29	Undiagnosed T2DM
1895	158.523	1_Johor	SMK SIMPANG RENGAM	48	Female	Malay									0									4.2	97	67	5.9	0.7	2.2	3.38	Healthy	Healthy
1896	158.523	1_Johor	SMK SIMPANG RENGAM	50	Female	Malay	Master and above	Married	Yes	0	1	Inadequate	5	7	0	70	No	No	90	No	12	12	12	4.9	142	68	6.4		1.7	3.25	Healthy	Healthy
1897	158.523	1_Johor	SMK SIMPANG RENGAM	48	Female	Malay		Married	Yes						0				66	Abdominal obese				5.7	112	65	4.2	1.3	1.4	2.21	Healthy	Impaired fasting glucose
1898	158.523	1_Johor	SMK SIMPANG RENGAM	54	Male	Malay	Master and above	Married	No	0	1	Inadequate	5	5	480	120	No	No	87	Abdominal obese	0	2	0	5.2	152	98	7.5	3	1.8	4.34	Healthy	Healthy
1899	158.523	1_Johor	SMK SIMPANG RENGAM	48	Male	Malay									0				106	No				8.6	141	83	6	1.6	1.1	4.17	Undiagnosed T2DM
1900	158.523	1_Johor	SMK SIMPANG RENGAM	39	Male	Malay	Degree	Married	Yes	0	1	Inadequate	5	5	4359	60	Yes	No	80	Abdominal obese	0	12	4	4.2	119	77	4.5	1.9	1.2	2.44	Healthy	Healthy
1901	158.523	1_Johor	SMK SIMPANG RENGAM	40	Female	Malay	Secondary	Married	Yes	2	1	Inadequate			1638		No	No	72	Abdominal obese	0	0	0	4.7	98	63	5.2	0.6	1.9	3.03	Healthy	Healthy
1902	158.523	1_Johor	SMK SIMPANG RENGAM	49	Female	Malay	Degree	Married	No	1	1	Inadequate	6	8	1920	60	No	No	67.5	Abdominal obese	8	6	8	5	111	64	4.2	0.6	1.7	2.23	Healthy	Healthy
1903	158.523	1_Johor	SMK SIMPANG RENGAM	47	Female	Malay	Master and above	Married	Yes	1	2	Inadequate	6	6	960	40	No	No	73	Abdominal obese	12	14	14	4.9	104		6.1	0.9	1.7	3.99	Healthy	Healthy
1904	158.523	1_Johor	SMK SIMPANG RENGAM	43	Female	Malay	Master and above	Single	No	7	7	Adequate	7	8	4638	30	No	No	79	Abdominal obese	2	2	2	5.5	109	61	4.5	1	1.6	2.45	Healthy	Healthy
1905	158.523	1_Johor	SMK SIMPANG RENGAM	37	Female	Malay	Degree	Married	No	0			7	6	1182	420	No	No	65	Abdominal obese	8	6	8	4.7	125	67	5.5	0.7	1.9	3.28	Healthy	Healthy
1906	158.523	1_Johor	SMK SIMPANG RENGAM	31	Female	Malay									0				81	No				4.8	114	72	4.5	0.9	1.3	2.79	Healthy	Healthy
1907	158.523	1_Johor	SMK SIMPANG RENGAM	37	Female	Malay	Degree	Married	Yes	0	1	Inadequate	7	8	1120	120	No	No	65	Abdominal obese	8	4	4	4.6	102	66	4.2	0.7	1.6	2.28	Healthy	Healthy
1908	158.523	1_Johor	SMK SIMPANG RENGAM	42	Female	Malay	Degree	Married	Yes	0	1	Inadequate	7	8	6486	30	No	No	77	Abdominal obese	6	12	14	5.2	113	69	5.6	0.8	1.4	3.84	Healthy	Healthy
1909	158.523	1_Johor	SMK SIMPANG RENGAM	41	Female	Malay	Degree	Married	Yes	1	7	Inadequate	4	4	4560		No	No	76	Abdominal obese	10	14	16	5	113	94	5.7	0.9	1.6	3.69	Healthy	Healthy
1910	158.523	1_Johor	SMK SIMPANG RENGAM	48	Female	Malay	Degree	Married	No	2	7	Adequate			1908	180	No	No	78	Abdominal obese				5.3	121	77	4.2	1	1.7	2.05	Healthy	Healthy
1911	158.523	1_Johor	SMK SIMPANG RENGAM	37	Female	Malay	Degree	Married	Yes	0	0	Inadequate	7	7	0		No	No	76	Abdominal obese	8	6	12	4.9	93	66	5.6	0.8	1.8	3.44	Healthy	Healthy
1912	158.523	1_Johor	SMK SIMPANG RENGAM	55	Female	Malay									0				72	Abdominal obese				4.8	122	75	5.8	1.1	1.7	3.6	Healthy	Healthy
1913	158.523	1_Johor	SMK SIMPANG RENGAM	34	Female	Malay	Degree	Married	No	0			5	7	0		No	No	69	Abdominal obese	14	26	20	4.6	101		4.3	0.5	1.8	2.27	Healthy	Healthy
1914	158.523	1_Johor	SMK SIMPANG RENGAM	53	Female	Malay	Degree	Divorced		0	2	Inadequate	6	6	2019	360	No	No	73	Abdominal obese	2	8	12	5.7	107		6	0.9		3.19	Healthy	Impaired fasting glucose
1915	158.523	1_Johor	SMK SIMPANG RENGAM	50	Female	Malay	Degree	Married	No	0	1	Inadequate	6	6	0		No	No	73	Abdominal obese	12	10	16	5.2	103		5.2	0.8	1.8	3.04	Healthy	Healthy
1916	158.523	1_Johor	SMK SIMPANG RENGAM	55	Male	Malay	Degree	Married	Yes				8	6	6438	180	No	No	102	No	0	2	0	4.8	154	88	6.5	1.1	1.4	4.6	Healthy	Healthy
1917	144.273	1_Johor	SMK SEMERAH	42	Female	Malay	Degree	Widowed		1	1	Inadequate	5	5	480		No	No	88.5	No		12	4	4.9	94	69	5.3	2	1.6	2.79	Healthy	Healthy
1918	144.273	1_Johor	SMK SEMERAH	33	Female	Malay	Secondary	Single	No	0	0	Inadequate		7	5652	240	No	No	83	No	6	26	16	4.7	120	72	4.9	1.2	1.5	2.86	Healthy	Healthy
1919	144.273	1_Johor	SMK SEMERAH	33	Female	Malay	Degree	Married	Yes	1	1	Inadequate	5	5	0		No	No	74.5	Abdominal obese	0	4	4	4.5	110	69	5	0.6	1.5	3.23	Healthy	Healthy
1920	144.273	1_Johor	SMK SEMERAH	54	Female	Malay	Degree	Widowed	No	0	1	Inadequate	7	7	0			No	80.5	No	0	0	4	4.5	128	71	5.4	1.8	1.2	3.38	Healthy	Healthy
1921	144.273	1_Johor	SMK SEMERAH	39	Female	Malay	Degree	Married	Yes	0	1	Inadequate	5	5	1671	60	No	No	80	No	6	0	4	4.8	123	70	5.3	0.8	1.1	3.84	Healthy	Healthy
1922	144.273	1_Johor	SMK SEMERAH	48	Female	Malay	Degree	Widowed	Yes	1	1	Inadequate	8	8	0		No	No	88	No	0	8	4	4.9	150	90	5.5	1.1	1.2	3.8	Healthy	Healthy
1923	144.273	1_Johor	SMK SEMERAH	31	Female	Malay	Degree	Married	No	0			5	6	0	120	No	No	76	Abdominal obese	0	0	4	4.4	117	84	6.4	0.9	2.1	3.89	Healthy	Healthy
1924	144.273	1_Johor	SMK SEMERAH	27	Female	Malay	Degree	Married		0	1	Inadequate	6	7	231		No	No	64	Abdominal obese	4	8	6	4.7	94	63	5.5	0.9	1.5	3.59	Healthy	Healthy
1925	144.273	1_Johor	SMK SEMERAH	26	Female	Malay	Degree	Married							0				84.5	No				4.4	104	59	5.6	0.6	1.8	3.53	Healthy	Healthy
1926	144.273	1_Johor	SMK SEMERAH	41	Female	Malay	Degree	Married	Yes	0	2	Inadequate	6	6	198	120	No	No	81.5	No	2	8	4	5.6	140	74	4.2	0.8	1.1	2.74	Healthy	Impaired fasting glucose
1927	144.273	1_Johor	SMK SEMERAH	49	Male	Malay	Degree	Married		1	1	Inadequate	6	7	1386	300	Yes	No	89	Abdominal obese	8	10	14	5.4	134	80	5.9	2.1	1.1	3.85	Healthy	Healthy
1928	144.273	1_Johor	SMK SEMERAH	35	Male	Malay	Degree	Married	Yes	0	1	Inadequate	6	6	231	60	No	No	88	Abdominal obese	6	0	4	4.6	135	83	6.5	0.7	1.4	4.78	Healthy	Healthy
1929	144.273	1_Johor	SMK SEMERAH	32	Male	Malay	Degree	Married	No	1	3	Inadequate	6	8	594	180	Yes	No	70	Abdominal obese	2	2	4	4.4	125	75	5.7	1	1.6	3.65	Healthy	Healthy
1930	144.273	1_Johor	SMK SEMERAH	42	Female	Malay	Degree	Single	Yes	1	1	Inadequate	5	7	4158	120	No	No	60	Abdominal obese	6	8	12	4.2	103		5.8	1.4	1.6	3.56	Healthy	Healthy
1931	144.273	1_Johor	SMK SEMERAH	46	Female	Malay	Degree	Married	Yes	2	1	Inadequate	5	6	5785.5	135	No	No	89	No	0	2	4	4.8	127	64	4.5	1.3	1.4	2.51	Healthy	Healthy
1932	144.273	1_Johor	SMK SEMERAH	48	Male	Malay	Degree	Married	Yes				5	5	0	120	No	No	94.5	No	2	6	2	5.7	120	73	5.6		0.9	2.7	Healthy	Impaired fasting glucose
1933	144.273	1_Johor	SMK SEMERAH	54	Male	Malay	Degree	Married	No	1	1	Inadequate	6	7	9150	240	No	No	96	No	0	2	0	6.2	167		5.8	1.2	1.4	3.86	Undiagnosed T2DM
1934	144.273	1_Johor	SMK SEMERAH	32	Female	Malay	Degree	Married	Yes				6	7	1920		No	No	80	No	4	8	18	4.6	127	78	5.5	1.3	1.3	3.61	Healthy	Healthy
1935	144.273	1_Johor	SMK SEMERAH	36	Female	Malay	Degree	Married	Yes	1	1	Inadequate	6	7	819		No	No	79.5	Abdominal obese	0	0	2	4.5	166	101	6.5	1.5	1.5	4.32	Healthy	Healthy
1936	144.273	1_Johor	SMK SEMERAH	43	Female	Malay	Degree	Married	No	1			5	6	5598	120	No	No	82.5	No	0	2		4.6	128	96	4.5	0.9	1.3	2.79	Healthy	Healthy
1937	144.273	1_Johor	SMK SEMERAH	41	Female	Malay	Diploma	Married	No	1	0	Inadequate	7	6	847.5	10	No	No	93	No	6	10	12	4.4	156	101	5.5	1.2	1.9	3.06	Healthy	Healthy
1938	144.273	1_Johor	SMK SEMERAH	44	Female	Malay	Degree	Married							0									5.2	108	64	6.1	0.5	2.1	3.77	Healthy	Healthy
1939	144.273	1_Johor	SMK SEMERAH	26	Female	Malay	Degree	Single	Yes				6	7	0		No	No	64	Abdominal obese	2	2	4	4.4	106	81	5.6	0.7	1.8	3.48	Healthy	Healthy
1940	144.273	1_Johor	SMK SEMERAH	26	Female	Malay	Degree	Married	No	0	0	Inadequate	6	6	735		No	No	105	No	0	8	8	5.1	146	94	4.9	1	1.1	3.35	Healthy	Healthy
1941	144.273	1_Johor	SMK SEMERAH	50	Male	Malay	Degree	Married	Yes	1	1	Inadequate	6	6	633	930	No	No	94	No	0	4	2	4.4	121	65	5.3	1.6	1.1	3.47	Healthy	Healthy
1942	144.273	1_Johor	SMK SEMERAH	34	Female	Malay	Degree	Married	Yes	0	3	Inadequate	7	8	0		No	No	75	Abdominal obese	6	2	10	4.7	119	68	4.8	0.6	1.4	3.13	Healthy	Healthy
1943	144.273	1_Johor	SMK SEMERAH	53	Female	Malay	Degree	Married	Yes	0	1	Inadequate	5	5	0		No	No	80	No	0	0	2	6.6	121	81	5.3	2.1	1.2	3.15	T2DM
1944	144.273	1_Johor	SMK SEMERAH	47	Male	Malay	Degree	Married					6	6	198	120	Yes	No	91	No	6	14	8	5.4	169	98	7	1.4	1.5	4.86	Healthy	Healthy
1945	144.273	1_Johor	SMK SEMERAH	31	Female	Malay	Degree	Married	No				7	6	346.5	300	No	No	88	No	0	2	2	4.6	127	79	5.9	1.4	1.6	3.66	Healthy	Healthy
1946	98.99	1_Johor	SMK TAMAN SERI SAUJANA	44	Female	Malay	Degree	Married	Yes	1	1	Inadequate	6	7	0		No	No	89	No	14	18	16	5.5	132	82	3.9	1.2	0.86	2.49	Healthy	Healthy
1947	98.99	1_Johor	SMK TAMAN SERI SAUJANA	43	Female	Malay	Degree	Married	Yes	2	1	Inadequate	7	8	0	60	No	No	85	No	4	8	12	5.3	163	89	6.6	1.1	1.61	4.51	Healthy	Healthy
1948	98.99	1_Johor	SMK TAMAN SERI SAUJANA	27	Female	Malay	Secondary	Married	Yes	0	1	Inadequate	5	6	760	120	No	No	62	Abdominal obese	6	8	12	5.5	133	77	5.3	0.7	1.45	3.56	Healthy	Healthy
1949	98.99	1_Johor	SMK TAMAN SERI SAUJANA	35	Female	Malay	Degree	Married	Yes	0			5	8	0		No	No	75	Abdominal obese	2	2	4	4.8	113	65	6.2	1.6	1.83	3.68	Healthy	Healthy
1950	98.99	1_Johor	SMK TAMAN SERI SAUJANA	33	Female	Indian									0				73	Abdominal obese				5.1	108	67	5.2	0.9	1.53	3.24	Healthy	Healthy
1951	98.99	1_Johor	SMK TAMAN SERI SAUJANA	33	Female	Malay	Degree	Married	No	1	0	Inadequate	5	5	960	20	No	No	68	Abdominal obese	2	6	6	4.9	98		5.5	0.6	2.13	3.15	Healthy	Healthy
1952	98.99	1_Johor	SMK TAMAN SERI SAUJANA	31	Male	Malay									0				82	Abdominal obese				6.3	115	81	6.4	2.4	1.19	4.16	Undiagnosed T2DM
1953	98.99	1_Johor	SMK TAMAN SERI SAUJANA	34	Female	Malay	Diploma	Married	Yes	1	1	Inadequate	6	7	1695	360	No	No	64	Abdominal obese	8	12	14	4.5	107	64	5.9	0.8	1.53	3.99	Healthy	Healthy
1954	98.99	1_Johor	SMK TAMAN SERI SAUJANA	48	Male	Malay	Degree	Married	No	1	1	Inadequate	6	6	975	120	No	No	73	Abdominal obese	8	8	10	4.6	122	71	5.2	1.4	1.13	3.47	Healthy	Healthy
1955	98.99	1_Johor	SMK TAMAN SERI SAUJANA	29	Female	Malay	Degree	Married	Yes				8	7	198		No	No	79	Abdominal obese	10	14	10	4.3	110	59	5.2	0.7	1.45	3.4	Healthy	Healthy
1956	98.99	1_Johor	SMK TAMAN SERI SAUJANA	34	Female	Malay									0				71	Abdominal obese				4.4	103	60	5.6	1.2	1.91	3.17	Healthy	Healthy
1957	98.99	1_Johor	SMK TAMAN SERI SAUJANA	31	Male	Malay									0									4.8	118	76	4.8	1	0.82	3.55	Healthy	Healthy
1958	98.99	1_Johor	SMK TAMAN SERI SAUJANA	45	Male	Malay									0				97	No				6.3	124	78	5.5	2.3	1.02	3.44	Undiagnosed T2DM
1959	98.99	1_Johor	SMK TAMAN SERI SAUJANA	30	Male	Malay	Degree	Married	Yes				6	5	1200		No	No	99	No	0	0	0	4.6	125	90	3.8	0.9	0.84	2.57	Healthy	Healthy
1960	98.99	1_Johor	SMK TAMAN SERI SAUJANA	64	Female	Malay	Degree	Married	Yes	1	1	Inadequate	7	5	231	60	No	No	88	No	0	12	10	5	123	81	6.2	0.9	1.62	4.15	Healthy	Healthy
1961	98.99	1_Johor	SMK TAMAN SERI SAUJANA	26	Female	Malay									0				64	Abdominal obese				5.2	102	73	4.9	0.5	2.02	2.69	Healthy	Healthy
1962	131.986	1_Johor	SMK SERI AMAN	34	Female	Malay	Degree	Married	No	0	2	Inadequate	7	7	0	120	No	No	79	Abdominal obese	8	2	12	5.1	128	85	4.6	0.6	1.55	2.78	Healthy	Healthy
1963	131.986	1_Johor	SMK SERI AMAN	40	Female	Malay	Degree	Married	No	0	1	Inadequate	4	7	840	180	No	No	75	Abdominal obese	14	4	10	5	101	60	6	0.9	1.37	4.22	Healthy	Healthy
1964	131.986	1_Johor	SMK SERI AMAN	31	Female	Malay	Degree	Married	Yes	0	1	Inadequate	6	7	3831	120	No	No	85	No	10	14	14	5	115	74	5.3	0.6	1.8	3.23	Healthy	Healthy
1965	131.986	1_Johor	SMK SERI AMAN	44	Male	Malay	Degree	Married	Yes	2	1	Inadequate	6	6	480		No	No	91	No	4	6	8	4.5	125	80	6.2	1.4	1.27	4.29	Healthy	Healthy
1966	131.986	1_Johor	SMK SERI AMAN	39	Female	Malay	Degree	Married	No	2	2	Inadequate	5	6	0		No	No	95	No	2	4	10	4.8	131	85	5.2	1.5	1.03	3.49	Healthy	Healthy
1967	131.986	1_Johor	SMK SERI AMAN	35	Male	Malay									0				98	No					131	72			1.23		Healthy	Healthy
1968	131.986	1_Johor	SMK SERI AMAN	32	Female	Malay	Degree	Married	Yes	0	1	Inadequate	8	8	1893	600	No	No	82	No	2	4	6	5	136	91	6.9	1.4	1.57	4.69	Healthy	Healthy
1969	131.986	1_Johor	SMK SERI AMAN	48	Male	Malay	Degree	Married		0	1	Inadequate	5	5	2880	90	No	No	91	No	2	0	0	5.8	133	76	4.7	1.8	1	2.88	Healthy	Impaired fasting glucose
1970	131.986	1_Johor	SMK SERI AMAN	28	Female	Malay	Degree	Married	No	1	1	Inadequate	6	7	1626	420	No	No	66	Abdominal obese	6	4	12	4.9		59		0.5	1.66	1.61	Healthy	Healthy
1971	131.986	1_Johor	SMK SERI AMAN	30	Female	Malay	Degree	Married		1	1	Inadequate	7	7	933	660	No	No	64	Abdominal obese	12	4	10	4.8	125	64	5.4	0.8	1.79	3.25	Healthy	Healthy
1972	131.986	1_Johor	SMK SERI AMAN	45	Male	Malay	Degree	Married	No	1	1	Inadequate	6	6	1800		No	No	91	No	0	0	2	4.8	107	70		1	0.8	2.25	Healthy	Healthy
1973	131.986	1_Johor	SMK SERI AMAN	30	Female	Malay									0				83.5	No				4.9	120	66	5.7	2.5	1.55	3.01	Healthy	Healthy
1974	214.194	1_Johor	SMK SULTANAH ENGKU TUN AMINAH	49	Female	Chinese									0				65	Abdominal obese				5.2	118	65	3.8	0.5	2.06		Healthy	Healthy
1975	214.194	1_Johor	SMK SULTANAH ENGKU TUN AMINAH	49	Female	Malay	Degree	Married	Yes	1	1	Inadequate	6	6	4284	120	No	No	95.5	No	14	14	14	5	117	66	3.9	0.8	1.16	2.38	Healthy	Healthy
1976	214.194	1_Johor	SMK SULTANAH ENGKU TUN AMINAH	39	Female	Malay									0				75.5	Abdominal obese				5.1	118	71	5.1	0.6	1.2	3.63	Healthy	Healthy
1977	214.194	1_Johor	SMK SULTANAH ENGKU TUN AMINAH	39	Female	Malay	Degree	Married	No	0	0	Inadequate	7	5	499	50	No	No	75	Abdominal obese	2	2	8	4.5	104	68	4.8	0.6	1.9	2.63	Healthy	Healthy
1978	214.194	1_Johor	SMK SULTANAH ENGKU TUN AMINAH	49	Female	Malay	Degree	Married	Yes	1	1	Inadequate	8	7	3798	90	No	No	86.5	No	0	0	0	5.4	119	62	5.5	0.7	1.41	3.77	Healthy	Healthy
1979	214.194	1_Johor	SMK SULTANAH ENGKU TUN AMINAH	49	Female	Malay	Master and above	Married	No	1	1	Inadequate	7	6	4170	180	No	No	86	No	12	16	14	6.3	125	72	6	1.3	1.28	4.13	T2DM
1980	214.194	1_Johor	SMK SULTANAH ENGKU TUN AMINAH	59	Female	Malay	Diploma	Married	Yes	0	1	Inadequate	5	6	2133	60	No	No	66.5	Abdominal obese	2	4	2	5.3	139	83	5.6	0.8	2	3.24	Healthy	Healthy
1981	214.194	1_Johor	SMK SULTANAH ENGKU TUN AMINAH	53	Female	Chinese	Degree	Married	No	1	2	Inadequate	7	8	49.5	30	No	No	84.5	No	0	2	0	5	121	68	5.1	2.7	1.1	2.77	Healthy	Healthy
1982	214.194	1_Johor	SMK SULTANAH ENGKU TUN AMINAH	44	Female	Indian	Degree	Married	Yes	1	2	Inadequate	5	6	396	30	No	No	101	No	6	14	14	6.5	116	78	5.6	1	1.14	4.01	Undiagnosed T2DM
1983	214.194	1_Johor	SMK SULTANAH ENGKU TUN AMINAH	46	Female	Malay	Degree	Married	No	1	2	Inadequate	5	6	3090	300	No	No	71.5	Abdominal obese	6	10	2	4.5	124	84	4.4	0.9	1.31	2.68	Healthy	Healthy
1984	214.194	1_Johor	SMK SULTANAH ENGKU TUN AMINAH	34	Female	Malay	Degree	Married	Yes	0	1	Inadequate	5	6	0	30	No	No	79.5	Abdominal obese	4	12	14	4.4	99	64	4.7	0.4	1.99	2.53	Healthy	Healthy
1985	214.194	1_Johor	SMK SULTANAH ENGKU TUN AMINAH	31	Female	Malay	Degree	Married	Yes	1	1	Inadequate	8	9	3000	60	No	No	92.5	No	12	12	18	4.6	117	75	6.1	1.1	1.42	4.18	Healthy	Healthy
1986	214.194	1_Johor	SMK SULTANAH ENGKU TUN AMINAH	52	Female	Malay	Degree	Married	Yes	0	1	Inadequate	5	5	0	180	No	No	79	Abdominal obese	2	10	6	6	117	78	6.1	1.2	1.49	4.07	Healthy	Impaired fasting glucose
1987	214.194	1_Johor	SMK SULTANAH ENGKU TUN AMINAH	37	Female	Malay									0				67	Abdominal obese				4.6	122	87	4	0.4	1.42	2.4	Healthy	Healthy
1988	214.194	1_Johor	SMK SULTANAH ENGKU TUN AMINAH	28	Female	Malay	Degree	Single	Yes	0	1	Inadequate	5	7	372	60	No	No	76	Abdominal obese	8	10	6	5.2	121	74	4.4	0.6	1.28	2.85	Healthy	Healthy
1989	214.194	1_Johor	SMK SULTANAH ENGKU TUN AMINAH	46	Female	Malay	Degree	Married	No	1	2	Inadequate	5	4	942	60	No	No	89	No	2	4	14	5.4	133	73	4.7	0.6	1.45	2.98	Healthy	Healthy
1990	214.194	1_Johor	SMK SULTANAH ENGKU TUN AMINAH	44	Female	Malay	Degree	Married	No	2	2	Inadequate	5	5	5280	30	No	No	81.5	No	4	4	6	4.9	136	92	6	0.8	1.76	3.88	Healthy	Healthy
1991	214.194	1_Johor	SMK SULTANAH ENGKU TUN AMINAH	30	Female	Malay	Degree	Single	Yes	0	1	Inadequate	6	6	960	30	No	No	75	Abdominal obese	0	2	0	4.6	113	74	6.9	0.9	1.93	4.56	Healthy	Healthy
1992	214.194	1_Johor	SMK SULTANAH ENGKU TUN AMINAH	48	Male	Malay									0				96.5	No				4.2	132	83	6	0.9	1.29	4.3	Healthy	Healthy
1993	214.194	1_Johor	SMK SULTANAH ENGKU TUN AMINAH	55	Female	Chinese	Degree	Married	No	1	1	Inadequate	7	8	579	30	No	Yes	72.5	Abdominal obese	2	12	14	5.8	99	65	4.5	0.9	1.68	2.41	Healthy	Impaired fasting glucose
1994	214.194	1_Johor	SMK SULTANAH ENGKU TUN AMINAH	46	Female	Malay	Degree	Widowed	No	0	1	Inadequate	6	7	560	40	No	No	71	Abdominal obese	12	16	16	4.8	143	62	5.9	1.2	1.16	4.2	Healthy	Healthy
1995	214.194	1_Johor	SMK SULTANAH ENGKU TUN AMINAH	29	Female	Malay	Master and above	Married	No	1	2	Inadequate	6	6	4518	240	No	No	65	Abdominal obese	40	40	40	4.6	108	64	4.5	0.4	1.76	2.56	Healthy	Healthy
1996	214.194	1_Johor	SMK SULTANAH ENGKU TUN AMINAH	27	Male	Malay	Degree	Married	Yes	0	0	Inadequate	5	6	0	60	No	No	111	No	2	6	4	4.1	106	65		1.5	0.61	1.81	Healthy	Healthy
1997	214.194	1_Johor	SMK SULTANAH ENGKU TUN AMINAH	28	Female	Malay	Degree	Married	Yes	1	1	Inadequate	5	8	1320	50	No	No	64.5	Abdominal obese	4	8	8	4.6	99	59	4	0.5	1.68	2.09	Healthy	Healthy
1998	214.194	1_Johor	SMK SULTANAH ENGKU TUN AMINAH	34	Female	Malay	Degree	Married	No	1	1	Inadequate	6	8	1200	20	No	No	73	Abdominal obese	6	8	6	5	126	106	5.8	1.6	1.45	3.62	Healthy	Healthy
1999	214.194	1_Johor	SMK SULTANAH ENGKU TUN AMINAH	25	Female	Chinese	Degree	Single	Yes	0	1	Inadequate	7	9	628.5	240	No	No	93	No	4	8	8	5	111	72	5.3	0.6	1.6	3.43	Healthy	Healthy
2000	214.194	1_Johor	SMK SULTANAH ENGKU TUN AMINAH	26	Female	Malay	Degree	Married	No	1	1	Inadequate	6	6	1191	20	No	No	69	Abdominal obese	12	8	16	4.4	102	59	4.5	1.1	1.48	2.52	Healthy	Healthy
2001	214.194	1_Johor	SMK SULTANAH ENGKU TUN AMINAH	25	Female	Malay	Degree	Single	Yes	1	0	Inadequate	5	8	0	50	No	No	66	Abdominal obese	6	12	16	4.9	108	69	4.9	0.6	1.65	2.98	Healthy	Healthy
2002	214.194	1_Johor	SMK SULTANAH ENGKU TUN AMINAH	31	Female	Malay	Degree	Single	No	1	5	Inadequate	6	7	0	40	No	No	70.5	Abdominal obese	12	8	12	4.5	135	87	6.2	0.7		3.57	Healthy	Healthy
2003	214.194	1_Johor	SMK SULTANAH ENGKU TUN AMINAH	47	Female	Indian	Master and above	Single	Yes	1	4	Inadequate	5	7	2556	40	No	No	96	No	0	2	4	5.4	125	87	3.8	1	0.87	2.48	T2DM
2004	214.194	1_Johor	SMK SULTANAH ENGKU TUN AMINAH	29	Female	Malay	Degree	Married	No	3	2	Inadequate	6	8	720	180	No	No	69.5	Abdominal obese	2	2	2	4.9	117	79	4.1	0.6	1.67	2.16	Healthy	Healthy
2005	214.194	1_Johor	SMK SULTANAH ENGKU TUN AMINAH	38	Female	Malay	Degree	Married	Yes	1	1	Inadequate	5	6	765	300	No	No	77	Abdominal obese	6	10	8	5.1	109	71	5.1	0.7	2.14	2.64	Healthy	Healthy
2006	214.194	1_Johor	SMK SULTANAH ENGKU TUN AMINAH	53	Female	Malay	Degree	Married	No	2	1	Inadequate	7	6	702	120	No	No	92.5	No	0	0	0	13.3	148	93		1.3	0.83	1.98	T2DM
2007	116.22	1_Johor	SMK SENGGARANG	33	Female	Malay	Degree	Married	No	0	3	Inadequate	5	6	240	60	No	No	81.5	No	0	0	10	4.1	127	83	4.6	0.5	2.11	2.26	Healthy	Healthy
2008	116.22	1_Johor	SMK SENGGARANG	42	Female	Malay									0				65	Abdominal obese				4.9	127	70	6.3	0.7	1.19	4.75	Healthy	Healthy
2009	116.22	1_Johor	SMK SENGGARANG	41	Female	Malay	Degree	Married	No	0	1	Inadequate	5	6	9198	180	No	No	86	No	12	10	12	4.8	137	82	3.8	1.2	0.98	2.26	Healthy	Healthy
2010	116.22	1_Johor	SMK SENGGARANG	33	Male	Malay	Degree	Married	No	2	2	Inadequate	5	6	3238.5		Yes	No	89.5	Abdominal obese	6	12	10	5.1	165	100	5.8	1	1.27	4.06	Healthy	Healthy
2011	116.22	1_Johor	SMK SENGGARANG	57	Male	Malay	Master and above	Widowed	No	0	1	Inadequate	6	6	3330	15	No	No	70.5	Abdominal obese	0	6	4	5.1		93	5.5	0.9	1.27	3.81	Healthy	Healthy
2012	116.22	1_Johor	SMK SENGGARANG	32	Female	Malay	Master and above	Married	Yes	1	1	Inadequate	7	7	0		No	No	67	Abdominal obese	4	2	6	5	121	73	4.7	0.8	1.43	2.86	Healthy	Healthy
[truncated: 12,145 more rows]
