# Supplementary material for: Prevalence of type 2 diabetes mellitus and impaired fasting glucose, and their associated lifestyle factors among teachers in the CLUSTer cohort
Source: PeerJ. 2024 Jan 22;12:e16778. doi: 10.7717/peerj.16778 (PMC10809994; doi:10.7717/peerj.16778)
Supplement: Data S3 [file peerj-12-16778-s013.xlsx]

## Sheet: Sheet1
No	School_weight	States	School	Age	Sex	Ethnic	EducationLevel2	MaritalStatus2	Fam_His_DM_CAT	GDM_CAT	PA_CAT	Sit_min	Sit_Duration	Fruit_CAT	Vege_CAT	Fruit_Vege_adequate	SleepDuration	SleepDuration_CAT	WaistCircumference	WC_CAT	Total_Depression	Depression_CAT	Total_Anxiety	Anxiety_CAT	Total_Stress	Stress_CAT	Smokingstatus	Alcoholconsumption	glucose	SBP	DBP	TC	TG	LDL	HDL	Uncontrolled_DM	Undiagnosed_DM	dm	dm_med	hpt	dyslipidemia	IFG	DM
1	103.333	1_Johor	SMK JEMENTAH	49	Male	Malay	Degree	Married	No	No	Moderate	240	No Sedentary	<2	>=3	Inadequate	7	7 hrs and above	99.5	Central obese	2	No Depression	0	No Anxiety	2	No Stress	Yes	No	5.5	123	73	5.5	1.57115	2.95	1.1	No	No	No	No	No	No	0	0
2	103.333	1_Johor	SMK JEMENTAH	34	Male	Malay	Degree	Married	Yes	No	High	159	No Sedentary	<2	<3	Inadequate	5	< 7 hrs	103	Central obese	8	No Depression	14	Anxiety	12	No Stress	No	No	5	128	80	5.2	2.5	2.86	1.2	No	No	No	No	No	No	0	0
3	103.333	1_Johor	SMK JEMENTAH	36	Female	Chinese	Degree	Married	Yes	Yes	Low	120	No Sedentary	<2	<3	Inadequate	7	7 hrs and above	78.1	No central obese	14	Depression	6	No Anxiety	16	Stress	No	No	4.7	129	75	6.2	2.5	3.46	1.6	No	No	No	No	No	No	0	0
4	103.333	1_Johor	SMK JEMENTAH	30	Female	Malay	Degree	Married	No	No	High	180	No Sedentary	<2	<3	Inadequate	5	< 7 hrs	65.5	No central obese	2	No Depression	8	Anxiety	6	No Stress	No	No	4.5	103	66	4.73269	0.4	2.70423	1.7	No	No	No	No	No	No	0	0
5	103.333	1_Johor	SMK JEMENTAH	48	Male	Indian	Master and above	Married	No	No	Low	60	No Sedentary	<2	<3	Inadequate	7	7 hrs and above	100.5	Central obese	0	No Depression	0	No Anxiety	0	No Stress	No	No	5.4	152	94	5.6	1	3.85	1.3	No	No	No	No	No	Yes	0	0
7	103.333	1_Johor	SMK JEMENTAH	49	Female	Chinese	Degree	Single	Yes	No	Low	247	No Sedentary	>=2	<3	Inadequate	7	7 hrs and above	75.3	No central obese	8	No Depression	2	No Anxiety	10	No Stress	No	No	5.2	161	96	6.1	1.6	3.97	1.4	No	No	No	No	Yes	No	0	0
8	103.333	1_Johor	SMK JEMENTAH	35	Male	Malay	Degree	Married	No	No	Low	480	No Sedentary	<2	<3	Inadequate	5.5	< 7 hrs	102.2	Central obese	0	No Depression	8	Anxiety	2	No Stress	Yes	No	4.7	140	100	4.6	1.7	2.53	1.3	No	No	No	No	No	No	0	0
9	103.333	1_Johor	SMK JEMENTAH	47	Male	Malay	Degree	Married	Yes	No	Moderate	480	No Sedentary	<2	<3	Inadequate	4	< 7 hrs	94.5	Central obese	8	No Depression	16	Anxiety	6	No Stress	No	No	6.8	152	95	4.9	1.3	2.71	1.6	No	No	Yes	Yes	Yes	Yes		1
10	103.333	1_Johor	SMK JEMENTAH	34	Female	Malay	Degree	Married	No	No	High	212	No Sedentary	>=2	>=3	Adequate	8.5	7 hrs and above	90.2	Central obese	8	No Depression	10	Anxiety	14	Stress	No	No	4.6	115	73	5.1	1.3	3.21	1.3	No	No	No	No	No	No	0	0
11	103.333	1_Johor	SMK JEMENTAH	37	Female	Malay	Degree	Married	No	No	Moderate	158	No Sedentary	<2	<3	Inadequate	7	7 hrs and above	98	Central obese	4	No Depression	10	Anxiety	8	No Stress	No	No	4.7	164	95	4.5	0.8	2.84	1.3	No	No	No	No	No	Yes	0	0
12	103.333	1_Johor	SMK JEMENTAH	29	Male	Malay	Degree	Married	Yes	No	Moderate	249	No Sedentary	<2	<3	Inadequate	6.5	< 7 hrs	113	Central obese	0	No Depression	4	No Anxiety	8	No Stress	No	No	4.8	167	94	4.9	0.7	3.48	1.1	No	No	No	No	No	No	0	0
13	103.333	1_Johor	SMK JEMENTAH	43	Female	Chinese	Degree	Married	No	No	Moderate	240	No Sedentary	>=2	<3	Inadequate	6.5	< 7 hrs	82	Central obese	0	No Depression	0	No Anxiety	0	No Stress	No	Yes	4.8	145	90	4	0.5	2.27	1.5	No	No	No	No	No	No	0	0
15	103.333	1_Johor	SMK JEMENTAH	56	Male	Malay	Degree	Married	No	No	High	120	No Sedentary	>=2	<3	Inadequate	5.5	< 7 hrs	110	Central obese	4	No Depression	16	Anxiety	12	No Stress	No	No	4	155	85	5	1.4	2.86	1.5	No	No	No	No	No	Yes	0	0
16	103.333	1_Johor	SMK JEMENTAH	39	Female	Malay	Degree	Married	No	No	High	270	No Sedentary	<2	<3	Inadequate	5.5	< 7 hrs	72	No central obese	4	No Depression	2	No Anxiety	2	No Stress	No	No	5.1	116	64	3.8	0.4	2.22	1.4	No	No	No	No	No	No	0	0
18	103.333	1_Johor	SMK JEMENTAH	29	Male	Malay	Degree	Married	Yes	No	Moderate	120	No Sedentary	>=2	>=3	Adequate	7.5	7 hrs and above	86	No central obese	2	No Depression	2	No Anxiety	0	No Stress	No	No	4.1	118	74	4.1	0.7	2.18	1.6	No	No	No	No	No	No	0	0
19	103.333	1_Johor	SMK JEMENTAH	48	Male	Malay	Degree	Married	No	No	Low	167	No Sedentary	<2	<3	Inadequate	6	< 7 hrs	79	No central obese	0	No Depression	0	No Anxiety	0	No Stress	No	No	5.4	109	74	5.2	0.8	3.24	1.6	No	No	No	No	No	No	0	0
21	103.333	1_Johor	SMK JEMENTAH	34	Female	Chinese	Degree	Married	Yes	No	Low	30	No Sedentary	<2	<3	Inadequate	5.5	< 7 hrs	76	No central obese	10	Depression	8	Anxiety	12	No Stress	No	No	4.5	109	70	5.3	0.6	3.23	1.8	No	No	No	No	No	No	0	0
22	103.333	1_Johor	SMK JEMENTAH	34	Female	Malay	Degree	Married	Yes	Yes	Moderate	200	No Sedentary	<2	<3	Inadequate	8.5	7 hrs and above	99.5	Central obese	2	No Depression	6	No Anxiety	12	No Stress	No	No	4.5	159	99	5.08654	0.7	1.68	1.3	No	No	No	No	No	No	0	0
23	90.933	1_Johor	SMK LABIS	46	Female	Malay	Degree	Married	No	No	Low	170	No Sedentary	<2	<3	Inadequate	6.5	< 7 hrs	94	Central obese	2	No Depression	12	Anxiety	8	No Stress	No	No	4.9	123	88	5.3	1.1	3.6	1.2	No	No	No	No	No	No	0	0
24	90.933	1_Johor	SMK LABIS	52	Male	Malay	Degree	Married	No	No	Moderate	180	No Sedentary	<2	<3	Inadequate	5.5	< 7 hrs	84	No central obese	18	Depression	12	Anxiety	16	Stress	No	No	5.3	130	79	7.7	1.4	5.36	1.7	No	No	No	No	No	No	0	0
25	90.933	1_Johor	SMK LABIS	48	Female	Malay	Degree	Married	No	No	Moderate	60	No Sedentary	<2	<3	Inadequate	7	7 hrs and above	87	Central obese	0	No Depression	8	Anxiety	2	No Stress	No	No	11.5	149	96	4.4	1.2	2.76	1.1	No	Yes	No	No	No	Yes		1
26	90.933	1_Johor	SMK LABIS	45	Female	Malay	Degree	Married	Yes	Yes	Moderate	180	No Sedentary	>=2	<3	Inadequate	5	< 7 hrs	99	Central obese	0	No Depression	0	No Anxiety	0	No Stress	No	No	5.7	139	96	4.4	0.6	2.83	1.3	No	No	Yes	Yes	Yes	No		1
27	90.933	1_Johor	SMK LABIS	44	Male	Malay	Degree	Married	No	No	Low	120	No Sedentary	<2	<3	Inadequate	7.5	7 hrs and above	90	Central obese	18	Depression	20	Anxiety	14	Stress	No	No	4.9	142	90	5.6	1.1	4.1	1	No	No	No	No	No	No	0	0
28	90.933	1_Johor	SMK LABIS	39	Female	Malay	Degree	Married	Yes	No	High	60	No Sedentary	<2	<3	Inadequate	5	< 7 hrs	84	Central obese	10	Depression	10	Anxiety	14	Stress	No	No	4.7	119	86	6.3	1.475	3.09	1.3	No	No	No	No	No	No	0	0
29	90.933	1_Johor	SMK LABIS	41	Male	Malay	Degree	Married	Yes	No	Moderate	240	No Sedentary	<2	<3	Inadequate	7	7 hrs and above	70.5	No central obese	4	No Depression	4	No Anxiety	8	No Stress	No	No	4.8	128	80	6.5	0.7	4.38	1.8	No	No	No	No	No	No	0	0
30	90.933	1_Johor	SMK LABIS	52	Male	Malay	Degree	Married	No	No	Moderate	182	No Sedentary	<2	<3	Inadequate	5.5	< 7 hrs	72	No central obese	2	No Depression	8	Anxiety	6	No Stress	No	No	4.7	167	87.0962	5.5	1.6	3.77	1	No	No	No	No	No	No	0	0
31	90.933	1_Johor	SMK LABIS	50	Female	Malay	Degree	Married	No	No	Low	720	sedentary	<2	<3	Inadequate	5.5	< 7 hrs	97.5	Central obese	4	No Depression	8	Anxiety	10	No Stress	Yes	No	4.8	140	88	3.6	0.4	2.02	1.4	No	No	No	No	No	No	0	0
32	90.933	1_Johor	SMK LABIS	32	Female	Malay	Degree	Married	No	No	Low	180	No Sedentary	>=2	>=3	Adequate	5	< 7 hrs	81	Central obese	0	No Depression	2	No Anxiety	0	No Stress	No	No	4.9	127	83	4.5	1.4	2.66	1.2	No	No	No	No	No	No	0	0
33	90.933	1_Johor	SMK LABIS	34	Female	Malay	Degree	Single	Yes	No	Low	30	No Sedentary	<2	<3	Inadequate	7.5	7 hrs and above	93	Central obese	2	No Depression	4	No Anxiety	2	No Stress	No	No	6.5	152	86.3654	4.1	1.1	2.5	1.1	No	Yes	No	No	No	No		1
34	90.933	1_Johor	SMK LABIS	48	Female	Malay	Degree	Married	Yes	No	Moderate	300	No Sedentary	<2	<3	Inadequate	5.5	< 7 hrs	92	Central obese	24	Depression	18	Anxiety	24	Stress	No	No	7.6	149	92	5.9	1.7	3.73	1.4	No	Yes	No	No	Yes	No		1
35	90.933	1_Johor	SMK LABIS	28	Female	Malay	Degree	Married	No	Yes	Low	178	No Sedentary	<2	<3	Inadequate	5	< 7 hrs	65.8	No central obese	6	No Depression	6	No Anxiety	8	No Stress	No	No	4.2	101	62	3.7	0.4	2.12	1.4	No	No	No	No	No	No	0	0
36	90.933	1_Johor	SMK LABIS	29	Female	Malay	Degree	Single	No	Yes	Low	165	No Sedentary	<2	<3	Inadequate	8	7 hrs and above	99	Central obese	12	Depression	16	Anxiety	16	Stress	No	No	5.5	132	85	5.7	1.2	4.16	1	No	No	No	No	No	No	0	0
38	90.933	1_Johor	SMK LABIS	44	Female	Indian	Degree	Married	No	No	High	480	No Sedentary	<2	<3	Inadequate	6	< 7 hrs	89	Central obese	14	Depression	14	Anxiety	14	Stress	No	No	4.5	126	79	6.7	2.1	4.55	1.2	No	No	No	No	No	No	0	0
39	90.933	1_Johor	SMK LABIS	51	Female	Malay	Master and above	Divorced/Widowed	No	No	Moderate	20	No Sedentary	<2	<3	Inadequate	6	< 7 hrs	82.5	Central obese	0	No Depression	4	No Anxiety	6	No Stress	No	No	5.3	142.558	97	6.4	0.9	4.09	1.9	No	No	No	No	No	No	0	0
40	90.933	1_Johor	SMK LABIS	51	Female	Indian	Degree	Divorced/Widowed	No	No	Low	270	No Sedentary	<2	<3	Inadequate	6	< 7 hrs	80	Central obese	0	No Depression	6	No Anxiety	10	No Stress	No	No	4.7	143	88	4.5	0.8	3.34	0.8	No	No	No	No	No	No	0	0
41	90.933	1_Johor	SMK LABIS	31	Female	Malay	Degree	Married	No	No	High	300	No Sedentary	<2	<3	Inadequate	6.79279	< 7 hrs	69	No central obese	14	Depression	18	Anxiety	14	Stress	No	No	4.4	124	75	5.8	0.6	4.03	1.5	No	No	No	No	No	No	0	0
42	90.933	1_Johor	SMK LABIS	29	Male	Malay	Degree	Married	Yes	No	Low	177	No Sedentary	<2	<3	Inadequate	7.5	7 hrs and above	89	No central obese	0	No Depression	0	No Anxiety	2	No Stress	No	No	4.6	129	82	4.9	1.4	3.16	1.1	No	No	Yes	Yes	No	No		1
43	162.381	1_Johor	SMK (LKTP) MAOKIL	45	Female	Malay	Degree	Single	Yes	No	Low	210	No Sedentary	<2	<3	Inadequate	8	7 hrs and above	75.1846	No central obese	0	No Depression	0	No Anxiety	6	No Stress	No	No	4.7	119	64	6.4	0.9	3.83	2.13	No	No	No	No	No	Yes	0	0
44	162.381	1_Johor	SMK (LKTP) MAOKIL	46	Female	Malay	Master and above	Single	Yes	No	Low	220	No Sedentary	<2	>=3	Inadequate	6.5	< 7 hrs	80	Central obese	2	No Depression	8	Anxiety	6	No Stress	No	No	5.1	159	88	5.5	1.2	3.54	1.43	No	No	No	No	No	No	0	0
45	162.381	1_Johor	SMK (LKTP) MAOKIL	46	Male	Indian	Master and above	Married	Yes	No	Moderate	194	No Sedentary	<2	<3	Inadequate	6	< 7 hrs	80	No central obese	4	No Depression	8	Anxiety	14	Stress	No	No	4.7	105	61	4.7	1	3.08	1.2	No	No	No	No	No	No	0	0
46	162.381	1_Johor	SMK (LKTP) MAOKIL	30	Female	Malay	Degree	Single	No	No	Moderate	180	No Sedentary	<2	<3	Inadequate	5.5	< 7 hrs	78.3788	No central obese	4	No Depression	0	No Anxiety	2	No Stress	No	No	4.9	134	76	5.3	0.9	2.99	1.91	No	No	No	No	No	No	0	0
47	162.381	1_Johor	SMK (LKTP) MAOKIL	30	Male	Malay	Degree	Single	No	No	High	120	No Sedentary	>=2	<3	Inadequate	5.5	< 7 hrs	71	No central obese	10	Depression	10	Anxiety	20	Stress	No	No	4.7	129	84	4.2	1	2.41	1.26	No	No	No	No	No	No	0	0
48	162.381	1_Johor	SMK (LKTP) MAOKIL	45	Female	Malay	Master and above	Married	No	No	Moderate	150	No Sedentary	<2	<3	Inadequate	5	< 7 hrs	92	Central obese	0	No Depression	2	No Anxiety	0	No Stress	No	No	5.2	131	81	6	1.6	4.07	1.19	No	No	No	No	No	No	0	0
49	162.381	1_Johor	SMK (LKTP) MAOKIL	38	Female	Malay	Degree	Single	Yes	No	Moderate	198	No Sedentary	<2	>=3	Inadequate	6	< 7 hrs	91	Central obese	4	No Depression	10	Anxiety	14	Stress	No	No	5.6	122	79	5.5	0.8	3.93	1.22	No	Yes	No	No	No	No	1	0
50	162.381	1_Johor	SMK (LKTP) MAOKIL	48	Male	Malay	Degree	Married	No	No	High	210	No Sedentary	<2	<3	Inadequate	6.5	< 7 hrs	98	Central obese	6	No Depression	8	Anxiety	12	No Stress	No	No	5.1	158	96	7.7	2	5.36	1.46	No	No	No	No	No	Yes	0	0
51	162.381	1_Johor	SMK (LKTP) MAOKIL	48	Male	Malay	Degree	Married	No	No	Moderate	30	No Sedentary	<2	<3	Inadequate	5	< 7 hrs	72	No central obese	4	No Depression	6	No Anxiety	10	No Stress	Yes	No	5.3	150	108	6.2	2.4	3.81	1.3	No	No	No	No	No	No	0	0
52	162.381	1_Johor	SMK (LKTP) MAOKIL	42	Male	Malay	Degree	Married	Yes	No	Moderate	180	No Sedentary	<2	<3	Inadequate	6	< 7 hrs	92.5	Central obese	6	No Depression	8	Anxiety	10	No Stress	No	No	4.6	143	83	4.8	2.2	2.77	1.03	No	No	No	No	No	No	0	0
53	162.381	1_Johor	SMK (LKTP) MAOKIL	52	Male	Malay	Degree	Married	No	No	Low	152	No Sedentary	>=2	<3	Inadequate	6.04471	< 7 hrs	92	Central obese	0	No Depression	0	No Anxiety	0	No Stress	No	No	5.2	134	87	4	1	2.47	1.14	No	No	No	No	Yes	Yes	0	0
54	162.381	1_Johor	SMK (LKTP) MAOKIL	46	Male	Malay	Degree	Married	Yes	No	Low	130	No Sedentary	<2	<3	Inadequate	4.93269	< 7 hrs	82	No central obese	8	No Depression	12	Anxiety	14	Stress	No	No	4.7	146	91	4.3	1.2	2.75	1	No	No	No	No	Yes	No	0	0
55	119.649	1_Johor	SMK DATO' AHMAD ARSHAD	31	Female	Malay	Degree	Married	No	No	Moderate	169	No Sedentary	<2	<3	Inadequate	7	7 hrs and above	67.5	No central obese	0	No Depression	8	Anxiety	6	No Stress	No	No	4.6	122	76	4.2	0.9	2.71	1.06	No	No	No	No	No	No	0	0
56	119.649	1_Johor	SMK DATO' AHMAD ARSHAD	41	Female	Malay	Master and above	Married	Yes	No	Moderate	150	No Sedentary	<2	<3	Inadequate	5.5	< 7 hrs	92	Central obese	10	Depression	12	Anxiety	14	Stress	No	No	5.2	161	92	4.4	1.4	2.75	1.05	No	No	No	No	No	No	0	0
57	119.649	1_Johor	SMK DATO' AHMAD ARSHAD	32	Female	Malay	Degree	Married	Yes	No	Moderate	193	No Sedentary	<2	<3	Inadequate	5.5	< 7 hrs	83	Central obese	6	No Depression	4	No Anxiety	6	No Stress	No	No	5.1	120	74	4.5	1.1	2.89	1.07	No	No	No	No	No	No	0	0
58	119.649	1_Johor	SMK DATO' AHMAD ARSHAD	29	Female	Malay	Degree	Married	No	Yes	Moderate	186	No Sedentary	<2	<3	Inadequate	6.5	< 7 hrs	81	Central obese	26	Depression	14	Anxiety	24	Stress	No	No	5	112	67	4.7	1.6	2.99	1.03	No	No	No	No	No	No	0	0
59	119.649	1_Johor	SMK DATO' AHMAD ARSHAD	30	Female	Malay	Degree	Married	Yes	Yes	Low	198	No Sedentary	<2	<3	Inadequate	5	< 7 hrs	75.5	No central obese	6	No Depression	4	No Anxiety	4	No Stress	No	No	4.9	114	76	4.1	0.6	2.59	1.29	No	No	No	No	No	No	0	0
60	119.649	1_Johor	SMK DATO' AHMAD ARSHAD	32	Female	Malay	Degree	Married	No	Yes	Moderate	120	No Sedentary	<2	<3	Inadequate	6	< 7 hrs	81	Central obese	2	No Depression	2	No Anxiety	8	No Stress	No	No	4.4	120	77	3.8	1.9	2.62135	1.63	No	No	No	No	No	No	0	0
61	119.649	1_Johor	SMK DATO' AHMAD ARSHAD	44	Female	Malay	Degree	Married	No	No	Moderate	420	No Sedentary	>=2	<3	Inadequate	6.24135	< 7 hrs	82	Central obese	0	No Depression	8	Anxiety	4	No Stress	No	No	5	109	73	7.6	1.3	4.81	2.21	No	No	No	No	No	No	0	0
62	119.649	1_Johor	SMK DATO' AHMAD ARSHAD	54	Male	Malay	Degree	Married	Yes	No	High	120	No Sedentary	<2	<3	Inadequate	6.5	< 7 hrs	86	No central obese	12	Depression	12	Anxiety	12	No Stress	No	No	5.8	128	79	7.4	3	4.66	1.4	No	Yes	No	No	No	No	1	0
63	119.649	1_Johor	SMK DATO' AHMAD ARSHAD	36	Female	Malay	Degree	Married	Yes	No	Low	198	No Sedentary	<2	<3	Inadequate	6.5	< 7 hrs	74.2	No central obese	2	No Depression	8	Anxiety	10	No Stress	No	No	4.1	104	66	4.4	0.4	2.48	1.72	No	No	No	No	No	No	0	0
64	119.649	1_Johor	SMK DATO' AHMAD ARSHAD	27	Female	Malay	Degree	Married	No	No	High	60	No Sedentary	<2	<3	Inadequate	7.5	7 hrs and above	94	Central obese	0	No Depression	4	No Anxiety	2	No Stress	No	No	4.5	131	64	6.8	1.5	4.81	1.32	No	No	No	No	No	No	0	0
65	119.649	1_Johor	SMK DATO' AHMAD ARSHAD	34	Female	Malay	Degree	Married	Yes	No	Moderate	600	sedentary	<2	<3	Inadequate	6.5	< 7 hrs	67	No central obese	14	Depression	10	Anxiety	18	Stress	No	No	4.5	116	75	5.3	0.8	3.23	1.74	No	No	No	No	No	No	0	0
66	119.649	1_Johor	SMK DATO' AHMAD ARSHAD	28	Female	Malay	Degree	Married	Yes	No	Low	180	No Sedentary	<2	<3	Inadequate	6	< 7 hrs	60	No central obese	4	No Depression	0	No Anxiety	4	No Stress	No	No	4.9	103	68	4.9	0.9	2.56	1.9	No	No	No	No	No	No	0	0
67	119.649	1_Johor	SMK DATO' AHMAD ARSHAD	44	Male	Indian	Degree	Married	No	No	High	180	No Sedentary	<2	<3	Inadequate	6	< 7 hrs	87	No central obese	2	No Depression	6	No Anxiety	14	Stress	No	No	4.5	153	87	4.6	2.6	2.53	0.86	No	No	No	No	No	No	0	0
68	119.649	1_Johor	SMK DATO' AHMAD ARSHAD	52	Female	Malay	Degree	Married	Yes	No	High	188	No Sedentary	<2	<3	Inadequate	6	< 7 hrs	76.5	No central obese	0	No Depression	0	No Anxiety	0	No Stress	No	No	5	128	72	7.5	1.2	5.06	1.84	No	No	No	No	No	No	0	0
69	119.649	1_Johor	SMK DATO' AHMAD ARSHAD	48	Female	Malay	Degree	Married	Yes	Yes	Low	209	No Sedentary	<2	<3	Inadequate	7	7 hrs and above	77	No central obese	0	No Depression	0	No Anxiety	2	No Stress	No	No	5.1	109	68	5.8	2	3.47	1.43	No	No	Yes	No	No	No		1
70	119.649	1_Johor	SMK DATO' AHMAD ARSHAD	43	Female	Malay	Degree	Married	Yes	No	Low	205	No Sedentary	<2	<3	Inadequate	6.14904	< 7 hrs	79.4	No central obese	0	No Depression	2	No Anxiety	8	No Stress	No	No	5.2	118	72	3.8	0.7	2	1.47	No	No	No	No	No	No	0	0
71	119.649	1_Johor	SMK DATO' AHMAD ARSHAD	30	Male	Malay	Degree	Married	Yes	No	Low	180	No Sedentary	<2	<3	Inadequate	7.5	7 hrs and above	82.5	No central obese	2	No Depression	4	No Anxiety	2	No Stress	No	No	4.1	122	81	4.5	1	2.84	1.25	No	No	No	No	No	No	0	0
73	119.649	1_Johor	SMK DATO' AHMAD ARSHAD	44	Female	Malay	Degree	Married	Yes	No	Moderate	180	No Sedentary	<2	<3	Inadequate	6	< 7 hrs	91	Central obese	0	No Depression	0	No Anxiety	0	No Stress	No	No	4.2	144	80	6	1.1	4.07	1.41	No	No	No	No	No	No	0	0
74	109.382	1_Johor	SMK SUNGAI ABONG	53	Male	Malay	Diploma and below	Married	Yes	No	Low	180	No Sedentary	<2	<3	Inadequate	5.5	< 7 hrs	93.5	Central obese	2	No Depression	0	No Anxiety	2	No Stress	No	No	5.5	142	88	5.5	1.2	3.56	1.4	No	No	No	No	No	Yes	0	0
75	109.382	1_Johor	SMK SUNGAI ABONG	50	Female	Chinese	Degree	Married	Yes	No	Moderate	90	No Sedentary	<2	<3	Inadequate	5.5	< 7 hrs	69.5	No central obese	6	No Depression	10	Anxiety	8	No Stress	No	No	4.6	123	60	5.2	0.6	2.83	2.1	No	No	No	No	No	No	0	0
76	109.382	1_Johor	SMK SUNGAI ABONG	47	Female	Chinese	Degree	Married	No	No	Low	360	No Sedentary	<2	<3	Inadequate	7.5	7 hrs and above	64	No central obese	4	No Depression	6	No Anxiety	8	No Stress	No	No	5	133	80	5.30385	1.2	3.27385	1.5	No	No	No	No	No	No	0	0
77	109.382	1_Johor	SMK SUNGAI ABONG	51	Female	Malay	Degree	Married	No	No	Low	223	No Sedentary	<2	>=3	Inadequate	6.18462	< 7 hrs	73.5	No central obese	4	No Depression	2	No Anxiety	6	No Stress	No	No	5.6	130	75	6.7	2.8	4.13	1.3	No	Yes	No	No	No	Yes	1	0
78	109.382	1_Johor	SMK SUNGAI ABONG	48	Female	Malay	Degree	Divorced/Widowed	No	No	High	210	No Sedentary	>=2	<3	Inadequate	6	< 7 hrs	66	No central obese	2	No Depression	8	Anxiety	10	No Stress	No	No	4.5	134	79.5192	4.7	1	2.95	1.3	No	No	No	No	No	No	0	0
79	109.382	1_Johor	SMK SUNGAI ABONG	56	Male	Chinese	Degree	Married	Yes	No	High	240	No Sedentary	>=2	<3	Inadequate	7.5	7 hrs and above	93.5	Central obese	12	Depression	4	No Anxiety	12	No Stress	No	No	6.6	126	89	5.2	1.3	3.51	1.1	No	Yes	No	No	No	No		1
80	109.382	1_Johor	SMK SUNGAI ABONG	41	Female	Chinese	Degree	Married	Yes	No	Moderate	120	No Sedentary	<2	>=3	Inadequate	5.5	< 7 hrs	82	Central obese	2	No Depression	2	No Anxiety	2	No Stress	No	No	5.2	129	77	6.2	1.9	3.44	1.9	No	No	No	No	No	No	0	0
81	109.382	1_Johor	SMK SUNGAI ABONG	26	Female	Malay	Degree	Married	No	No	Low	390	No Sedentary	<2	<3	Inadequate	5.5	< 7 hrs	67	No central obese	4	No Depression	2	No Anxiety	2	No Stress	No	No	4.6	116	68	4.57885	0.5	2.8325	1.5	No	No	No	No	No	No	0	0
82	109.382	1_Johor	SMK SUNGAI ABONG	48	Female	Malay	Master and above	Married	No	No	Low	207	No Sedentary	<2	<3	Inadequate	7.5	7 hrs and above	88	Central obese	4	No Depression	14	Anxiety	10	No Stress	No	No	5.2	123	79	7	2.6	4.52	1.3	No	No	No	No	No	No	0	0
83	109.382	1_Johor	SMK SUNGAI ABONG	27	Female	Malay	Degree	Married	Yes	No	Moderate	150	No Sedentary	<2	<3	Inadequate	6	< 7 hrs	69	No central obese	8	No Depression	4	No Anxiety	10	No Stress	No	No	5	103	67.4038	4.9	0.6	3.03	1.6	No	No	No	No	No	No	0	0
84	109.382	1_Johor	SMK SUNGAI ABONG	49	Female	Malay	Degree	Married	No	No	Low	180	No Sedentary	<2	<3	Inadequate	6.5	< 7 hrs	85	Central obese	4	No Depression	8	Anxiety	12	No Stress	No	No	4.9	120	76	4.3	1.1	2.9	0.9	No	No	No	No	No	No	0	0
85	109.382	1_Johor	SMK SUNGAI ABONG	57	Male	Malay	Master and above	Married	Yes	No	High	230	No Sedentary	<2	<3	Inadequate	4.5	< 7 hrs	97	Central obese	1	No Depression	2	No Anxiety	2	No Stress	No	No	5	131	88	5.7	1.6	3.67	1.3	No	No	No	No	No	No	0	0
86	109.382	1_Johor	SMK SUNGAI ABONG	28	Female	Malay	Degree	Married	Yes	Yes	High	240	No Sedentary	<2	<3	Inadequate	5.5	< 7 hrs	68	No central obese	4	No Depression	10	Anxiety	14	Stress	No	No	4.5	127	99	4.4	0.5	2.07	2.1	No	No	No	No	No	No	0	0
88	109.382	1_Johor	SMK SUNGAI ABONG	54	Male	Chinese	Diploma and below	Married	No	No	Moderate	180	No Sedentary	<2	<3	Inadequate	6	< 7 hrs	89.5	No central obese	4	No Depression	10	Anxiety	8	No Stress	No	No	5.4	129	74	5.2	1.8	3.38	1	No	No	No	Yes	No	No	0	0
90	109.382	1_Johor	SMK SUNGAI ABONG	44	Male	Malay	Degree	Married	No	No	High	202	No Sedentary	<2	<3	Inadequate	6	< 7 hrs	83.5	No central obese	20	Depression	20	Anxiety	22	Stress	No	No	5.2	112	83	3.8	2	1.69	1.2	No	No	No	No	No	No	0	0
92	109.382	1_Johor	SMK SUNGAI ABONG	32	Male	Malay	Degree	Married	Yes	No	Moderate	166	No Sedentary	<2	>=3	Inadequate	7.5	7 hrs and above	70	No central obese	0	No Depression	4	No Anxiety	6	No Stress	No	No	5.5	112	71	5.3	0.5	3.87	1.2	No	No	No	No	No	No	0	0
94	109.382	1_Johor	SMK SUNGAI ABONG	31	Female	Malay	Degree	Married	No	No	Low	2	No Sedentary	<2	>=3	Inadequate	7.5	7 hrs and above	88.5	Central obese	0	No Depression	0	No Anxiety	8	No Stress	No	No	4.7	105	60	4.3	0.4	2.92	1.2	No	No	No	No	No	No	0	0
95	109.382	1_Johor	SMK SUNGAI ABONG	31	Female	Malay	Degree	Married	No	No	High	120	No Sedentary	>=2	>=3	Adequate	7.5	7 hrs and above	87	Central obese	6	No Depression	6	No Anxiety	6	No Stress	No	No	4.7	98	70.7692	4.5	1.2	2.66	1.3	No	No	No	No	No	No	0	0
96	109.382	1_Johor	SMK SUNGAI ABONG	54	Male	Malay	Degree	Married	No	No	Low	176	No Sedentary	<2	<3	Inadequate	6	< 7 hrs	88	No central obese	0	No Depression	4	No Anxiety	6	No Stress	No	No	5.1	148	87	6.7	2.2	4.4	1.3	No	No	No	No	No	Yes	0	0
97	109.382	1_Johor	SMK SUNGAI ABONG	38	Male	Malay	Degree	Married	No	No	Moderate	120	No Sedentary	<2	<3	Inadequate	5	< 7 hrs	85	No central obese	3	No Depression	0	No Anxiety	10	No Stress	No	No	5.2	135	79	6.3	1.8	4.38	1.1	No	No	No	No	No	No	0	0
98	109.382	1_Johor	SMK SUNGAI ABONG	31	Male	Malay	Degree	Married	No	No	High	167	No Sedentary	<2	<3	Inadequate	7.5	7 hrs and above	74	No central obese	0	No Depression	4	No Anxiety	6	No Stress	No	No	5.1	130	84	5.9	1	4.35	1.1	No	No	No	No	No	No	0	0
99	105.175	1_Johor	SMK SULTAN ALAUDDIN RIAYAT SHAH 1	55	Male	Malay	Degree	Married	Yes	No	Low	193	No Sedentary	<2	<3	Inadequate	7	7 hrs and above	96.5	Central obese	0	No Depression	2	No Anxiety	0	No Stress	No	No	5.4	148	89	4.7	1.2	2.66	1.5	No	No	No	No	No	No	0	0
100	105.175	1_Johor	SMK SULTAN ALAUDDIN RIAYAT SHAH 1	30	Female	Malay	Degree	Married	No	No	Low	60	No Sedentary	<2	<3	Inadequate	6.5	< 7 hrs	64.5	No central obese	0	No Depression	8	Anxiety	4	No Stress	No	No	4	127	83	4.91346	0.6	1.83	1.4	No	No	No	No	No	No	0	0
101	105.175	1_Johor	SMK SULTAN ALAUDDIN RIAYAT SHAH 1	33	Female	Malay	Degree	Married	Yes	No	Low	60	No Sedentary	<2	<3	Inadequate	6.5	< 7 hrs	62	No central obese	0	No Depression	4	No Anxiety	4	No Stress	No	No	4.5	111	74	4.4	0.6	2.03	2.1	No	No	No	No	No	No	0	0
102	105.175	1_Johor	SMK SULTAN ALAUDDIN RIAYAT SHAH 1	33	Female	Indian	Degree	Married	Yes	No	Moderate	90	No Sedentary	<2	>=3	Inadequate	7.5	7 hrs and above	83	Central obese	6	No Depression	12	Anxiety	8	No Stress	No	No	4.8	124	69	4.7	1.3	2.71	1.4	No	No	No	No	No	No	0	0
103	105.175	1_Johor	SMK SULTAN ALAUDDIN RIAYAT SHAH 1	42	Female	Malay	Degree	Married	Yes	Yes	Low	193	No Sedentary	<2	<3	Inadequate	6.5	< 7 hrs	78	No central obese	6	No Depression	8	Anxiety	8	No Stress	No	No	5.2	117	77	4.8	0.6	3.53	1	No	No	No	No	No	No	0	0
104	105.175	1_Johor	SMK SULTAN ALAUDDIN RIAYAT SHAH 1	33	Female	Indian	Degree	Married	Yes	No	High	60	No Sedentary	>=2	<3	Inadequate	6.29808	< 7 hrs	83.5	Central obese	42	Depression	42	Anxiety	42	Stress	No	No	4.5	118	72	5.4	2	3.39	1.1	No	No	No	No	No	Yes	0	0
105	105.175	1_Johor	SMK SULTAN ALAUDDIN RIAYAT SHAH 1	30	Female	Malay	Degree	Married	Yes	No	Moderate	143	No Sedentary	<2	<3	Inadequate	6.5	< 7 hrs	70.5	No central obese	10	Depression	10	Anxiety	10	No Stress	No	No	4.4	117	69	5	0.6	3.03	1.7	No	No	No	No	No	No	0	0
106	105.175	1_Johor	SMK SULTAN ALAUDDIN RIAYAT SHAH 1	34	Female	Malay	Degree	Married	No	No	Low	227	No Sedentary	>=2	>=3	Adequate	6.5	< 7 hrs	98	Central obese	14	Depression	18	Anxiety	16	Stress	No	No	4.8	119	82	5.2	0.8	3.54	1.3	No	No	No	No	No	No	0	0
107	105.175	1_Johor	SMK SULTAN ALAUDDIN RIAYAT SHAH 1	31	Female	Malay	Degree	Married	Yes	No	Low	15	No Sedentary	<2	<3	Inadequate	6	< 7 hrs	89	Central obese	6	No Depression	6	No Anxiety	4	No Stress	No	No	4.4	109	63	5.44615	2.9	3.46365	0.7	No	No	No	No	No	No	0	0
108	105.175	1_Johor	SMK SULTAN ALAUDDIN RIAYAT SHAH 1	40	Female	Malay	Degree	Married	No	No	High	120	No Sedentary	<2	<3	Inadequate	6	< 7 hrs	82	Central obese	12	Depression	4	No Anxiety	10	No Stress	No	No	4.5	132	78	4.1	0.8	2.44	1.3	No	No	No	No	No	No	0	0
109	105.175	1_Johor	SMK SULTAN ALAUDDIN RIAYAT SHAH 1	40	Female	Malay	Degree	Married	No	No	High	360	No Sedentary	<2	<3	Inadequate	6	< 7 hrs	65	No central obese	0	No Depression	4	No Anxiety	8	No Stress	No	No	4.2	113	65	3.8	0.6	1.93	1.6	No	No	No	No	No	No	0	0
110	105.175	1_Johor	SMK SULTAN ALAUDDIN RIAYAT SHAH 1	29	Female	Chinese	Degree	Single	Yes	No	Low	201	No Sedentary	<2	<3	Inadequate	7	7 hrs and above	65	No central obese	10	Depression	6	No Anxiety	12	No Stress	No	No	4.5	100	78	4.6	0.9	2.89	1.3	No	No	No	No	No	No	0	0
111	105.175	1_Johor	SMK SULTAN ALAUDDIN RIAYAT SHAH 1	33	Female	Chinese	Degree	Married	Yes	No	Low	240	No Sedentary	<2	<3	Inadequate	8.5	7 hrs and above	79	No central obese	14	Depression	10	Anxiety	28	Stress	No	No	5.2	117	68	4.3	0.6	2.93	1.1	No	No	No	No	No	No	0	0
113	105.175	1_Johor	SMK SULTAN ALAUDDIN RIAYAT SHAH 1	43	Female	Malay	Degree	Married	No	No	Low	194	No Sedentary	<2	<3	Inadequate	6	< 7 hrs	74.1558	No central obese	4	No Depression	8	Anxiety	4	No Stress	No	No	5	98	60	5.8	0.7	3.88	1.6	No	No	No	No	No	No	0	0
114	105.175	1_Johor	SMK SULTAN ALAUDDIN RIAYAT SHAH 1	50	Male	Malay	Degree	Married	Yes	No	High	120	No Sedentary	<2	<3	Inadequate	4	< 7 hrs	87.5	No central obese	2	No Depression	12	Anxiety	6	No Stress	No	No	5.9	145	87	5.6	0.7	3.88	1.4	No	Yes	No	No	No	No	1	0
117	105.175	1_Johor	SMK SULTAN ALAUDDIN RIAYAT SHAH 1	44	Female	Malay	Degree	Married	No	No	Moderate	20	No Sedentary	<2	<3	Inadequate	5.96394	< 7 hrs	96	Central obese	6	No Depression	10	Anxiety	14	Stress	No	No	6.3	136	80	5.7	1.64615	3.11	1	No	Yes	No	No	No	Yes		1
118	105.175	1_Johor	SMK SULTAN ALAUDDIN RIAYAT SHAH 1	39	Female	Chinese	Degree	Single	No	No	Low	220	No Sedentary	<2	<3	Inadequate	8	7 hrs and above	71	No central obese	2	No Depression	6	No Anxiety	10	No Stress	No	Yes	5.3	112	67	4.2	0.9	2.39	1.4	No	No	No	No	No	No	0	0
119	105.175	1_Johor	SMK SULTAN ALAUDDIN RIAYAT SHAH 1	35	Female	Malay	Degree	Married	Yes	No	High	300	No Sedentary	<2	<3	Inadequate	6.5	< 7 hrs	60	No central obese	0	No Depression	4	No Anxiety	0	No Stress	No	No	4.3	99	71	4.5	0.6	2.63	1.6	No	No	No	No	No	No	0	0
122	105.175	1_Johor	SMK SULTAN ALAUDDIN RIAYAT SHAH 1	53	Male	Malay	Master and above	Married	Yes	No	High	360	No Sedentary	<2	<3	Inadequate	6	< 7 hrs	89.5673	No central obese	2	No Depression	10	Anxiety	2	No Stress	No	No	5.4	105	74	5.70385	1.8	3.48808	1.1	No	No	No	Yes	No	Yes	0	0
123	105.175	1_Johor	SMK SULTAN ALAUDDIN RIAYAT SHAH 1	46	Female	Malay	Degree	Married	No	No	Low	30	No Sedentary	<2	<3	Inadequate	6.09423	< 7 hrs	89	Central obese	6	No Depression	6	No Anxiety	2	No Stress	No	No	4.8	122	65	5.4	1	3.55	1.4	No	No	Yes	Yes	Yes	Yes		1
125	278.749	1_Johor	SMK SUNGAI TIRAM	29	Female	Malay	Degree	Married	Yes	No	Moderate	150	No Sedentary	<2	<3	Inadequate	5.5	< 7 hrs	69	No central obese	4	No Depression	8	Anxiety	12	No Stress	No	No	5	113	76	4.3	0.5	2.35	1.72	No	No	No	No	No	No	0	0
126	278.749	1_Johor	SMK SUNGAI TIRAM	31	Male	Malay	Degree	Married	Yes	No	Low	183	No Sedentary	<2	<3	Inadequate	6	< 7 hrs	78	No central obese	10	Depression	12	Anxiety	10	No Stress	No	No	4.4	121	73	4	1.4	2.21	1.15	No	No	No	No	No	No	0	0
127	278.749	1_Johor	SMK SUNGAI TIRAM	30	Female	Malay	Degree	Single	No	No	Moderate	231	No Sedentary	>=2	>=3	Adequate	6.48365	< 7 hrs	68	No central obese	0	No Depression	2	No Anxiety	2	No Stress	No	No	4.7	105	69	4.9	1.3	3.16	1.15	No	No	No	No	No	No	0	0
128	278.749	1_Johor	SMK SUNGAI TIRAM	26	Female	Malay	Degree	Single	Yes	No	Moderate	168	No Sedentary	<2	<3	Inadequate	6.44423	< 7 hrs	94	Central obese	4	No Depression	6	No Anxiety	0	No Stress	No	No	4.6	122	86	5.1	1.4	3.28	1.18	No	No	No	No	No	No	0	0
129	278.749	1_Johor	SMK SUNGAI TIRAM	27	Female	Malay	Degree	Single	Yes	No	Moderate	420	No Sedentary	<2	>=3	Inadequate	7	7 hrs and above	64	No central obese	14	Depression	18	Anxiety	22	Stress	No	No	4.8	115	67	5.1	0.5	3.58	1.29	No	No	No	No	No	No	0	0
130	278.749	1_Johor	SMK SUNGAI TIRAM	27	Female	Malay	Master and above	Single	Yes	No	Moderate	60	No Sedentary	<2	<3	Inadequate	6	< 7 hrs	91	Central obese	8	No Depression	16	Anxiety	20	Stress	No	No	4.5	156	107	4.7	1.3	2.89	1.22	No	No	No	No	No	No	0	0
131	278.749	1_Johor	SMK SUNGAI TIRAM	25	Female	Malay	Master and above	Single	No	No	Low	188	No Sedentary	>=2	>=3	Adequate	6	< 7 hrs	68	No central obese	2	No Depression	4	No Anxiety	4	No Stress	No	No	4.8	129	74	4.5	0.9	2.62	1.47	No	No	No	No	No	No	0	0
132	278.749	1_Johor	SMK SUNGAI TIRAM	26	Female	Malay	Degree	Married	Yes	Yes	Moderate	120	No Sedentary	>=2	<3	Inadequate	6	< 7 hrs	75	No central obese	14	Depression	24	Anxiety	18	Stress	No	No	4.2	123	84	5	0.6	3.29	1.44	No	No	No	No	No	No	0	0
133	278.749	1_Johor	SMK SUNGAI TIRAM	44	Female	Malay	Degree	Married	No	No	Low	120	No Sedentary	<2	<3	Inadequate	5	< 7 hrs	75	No central obese	6	No Depression	4	No Anxiety	12	No Stress	No	No	4.5	115	72	4	0.6	2.16	1.57	No	No	No	No	No	No	0	0
134	278.749	1_Johor	SMK SUNGAI TIRAM	38	Female	Malay	Degree	Divorced/Widowed	Yes	No	Low	174	No Sedentary	<2	<3	Inadequate	6.41731	< 7 hrs	77	No central obese	8	No Depression	10	Anxiety	8	No Stress	No	No	6.2	112	62	5.6	1.3	3.80942	1.27	No	Yes	No	No	No	No		1
135	278.749	1_Johor	SMK SUNGAI TIRAM	33	Female	Indian	Degree	Married	No	No	Low	120	No Sedentary	<2	<3	Inadequate	7	7 hrs and above	73	No central obese	4	No Depression	4	No Anxiety	12	No Stress	No	No	4.8	108	79	4.5	0.7	2.79	1.39	No	No	No	No	No	No	0	0
136	278.749	1_Johor	SMK SUNGAI TIRAM	26	Female	Indian	Degree	Married	No	No	High	60	No Sedentary	>=2	<3	Inadequate	7.5	7 hrs and above	69	No central obese	0	No Depression	4	No Anxiety	0	No Stress	No	No	4.7	110	67	3.6	0.6	2.26	1.07	No	No	No	No	No	No	0	0
137	278.749	1_Johor	SMK SUNGAI TIRAM	48	Female	Malay	Degree	Married	Yes	No	Low	180	No Sedentary	<2	<3	Inadequate	7	7 hrs and above	75	No central obese	1	No Depression	3	No Anxiety	3	No Stress	No	No	5.2	132	99	7.4	2	4.89	1.6	No	No	No	No	No	No	0	0
138	278.749	1_Johor	SMK SUNGAI TIRAM	47	Female	Malay	Degree	Married	No	No	Low	142	No Sedentary	<2	<3	Inadequate	6	< 7 hrs	96	Central obese	1	No Depression	2	No Anxiety	2	No Stress	No	No	4.9	151	88	3.6	0.9	2.01	1.18	No	No	No	No	No	No	0	0
140	278.749	1_Johor	SMK SUNGAI TIRAM	26	Female	Malay	Degree	Single	Yes	No	Low	15	No Sedentary	<2	<3	Inadequate	7	7 hrs and above	86	Central obese	16	Depression	16	Anxiety	18	Stress	No	No	4.85769	136	89	4.76538	0.4	3.08654	1.19	No	No	No	No	No	No	0	0
141	278.749	1_Johor	SMK SUNGAI TIRAM	34	Female	Malay	Degree	Married	Yes	No	Moderate	30	No Sedentary	<2	<3	Inadequate	5.5	< 7 hrs	65	No central obese	1	No Depression	3	No Anxiety	4	No Stress	No	No	4.2	102	66	5.1	0.5	3.24	1.63	No	No	No	No	No	No	0	0
142	278.749	1_Johor	SMK SUNGAI TIRAM	48	Female	Malay	Degree	Married	Yes	No	Low	193	No Sedentary	<2	<3	Inadequate	7.5	7 hrs and above	84	Central obese	14	Depression	16	Anxiety	14	Stress	No	No	5.1	144	79	4.3	0.8	2.45	1.49	No	No	No	No	No	No	0	0
143	278.749	1_Johor	SMK SUNGAI TIRAM	53	Male	Malay	Master and above	Married	No	No	Moderate	180	No Sedentary	<2	<3	Inadequate	7	7 hrs and above	111	Central obese	1	No Depression	3	No Anxiety	2	No Stress	No	No	8.5	147.962	100	4.3	1.2	2.85	0.91	No	Yes	No	No	Yes	Yes		1
144	278.749	1_Johor	SMK SUNGAI TIRAM	26	Female	Malay	Degree	Single	Yes	No	Low	173	No Sedentary	<2	<3	Inadequate	6.5	< 7 hrs	89	Central obese	2	No Depression	3	No Anxiety	3	No Stress	No	No	4.4	111	73	6.6	1.3	4.16	1.85	No	No	No	No	No	No	0	0
146	278.749	1_Johor	SMK SUNGAI TIRAM	31	Female	Malay	Degree	Married	No	No	Low	177	No Sedentary	<2	<3	Inadequate	5.5	< 7 hrs	80	Central obese	6	No Depression	16	Anxiety	12	No Stress	No	No	4.5	111	66	4.2	1.1	2.66	1.04	No	No	No	No	No	No	0	0
147	278.749	1_Johor	SMK SUNGAI TIRAM	36	Female	Other races	Degree	Married	Yes	No	Low	185	No Sedentary	<2	<3	Inadequate	5	< 7 hrs	82	Central obese	6	No Depression	8	Anxiety	12	No Stress	No	No	4.3	114	66	5.6	0.7	3.68	1.6	No	No	No	No	No	No	0	0
148	278.749	1_Johor	SMK SUNGAI TIRAM	29	Female	Malay	Degree	Married	No	No	Moderate	142	No Sedentary	>=2	<3	Inadequate	6	< 7 hrs	78	No central obese	0	No Depression	4	No Anxiety	4	No Stress	No	No	4.1	103	64	3.8	0.4	2.09	1.53	No	No	No	No	No	No	0	0
149	278.749	1_Johor	SMK SUNGAI TIRAM	28	Female	Malay	Degree	Married	No	No	High	150	No Sedentary	>=2	>=3	Adequate	6.5	< 7 hrs	73	No central obese	4	No Depression	4	No Anxiety	10	No Stress	No	No	5.2	141	80	4.6	0.8	3.13	1.11	No	No	No	No	No	No	0	0
150	278.749	1_Johor	SMK SUNGAI TIRAM	27	Female	Malay	Degree	Single	No	No	Low	275	No Sedentary	<2	<3	Inadequate	6.5	< 7 hrs	64	No central obese	6	No Depression	4	No Anxiety	12	No Stress	No	No	4.3	116	72	4.9	0.8	3.42	1.12	No	No	No	No	No	No	0	0
151	278.749	1_Johor	SMK SUNGAI TIRAM	45	Female	Indian	Diploma and below	Married	No	No	Moderate	61	No Sedentary	<2	<3	Inadequate	6	< 7 hrs	93	Central obese	0	No Depression	6	No Anxiety	4	No Stress	No	No	4.1	113	72	4.1	0.8	2.5	1.24	No	No	No	No	No	No	0	0
152	278.749	1_Johor	SMK SUNGAI TIRAM	25	Female	Malay	Diploma and below	Married	Yes	No	High	159	No Sedentary	<2	<3	Inadequate	7.05865	7 hrs and above	75	No central obese	14	Depression	16	Anxiety	16	Stress	No	No	4.2	114	73	4.7	0.6	3.02	1.59865	No	No	No	No	No	No	0	0
153	278.749	1_Johor	SMK SUNGAI TIRAM	26	Male	Malay	Diploma and below	Single	No	No	Low	300	No Sedentary	<2	<3	Inadequate	8	7 hrs and above	107	Central obese	0	No Depression	6	No Anxiety	14	Stress	Yes	No	10.9	159	87	4.8	2.6	2.82	0.8	No	Yes	No	No	No	No		1
155	278.749	1_Johor	SMK SUNGAI TIRAM	30	Female	Malay	Degree	Married	No	No	Low	153	No Sedentary	>=2	<3	Inadequate	6.5	< 7 hrs	70	No central obese	8	No Depression	14	Anxiety	8	No Stress	No	No	4.6	117	73	3.8	0.7	1.99	1.49	No	No	No	No	No	No	0	0
156	109.172	1_Johor	SMK SULTAN ALAUDDIN	43	Female	Malay	Degree	Married	Yes	No	Low	180	No Sedentary	>=2	>=3	Adequate	7.5	7 hrs and above	80	Central obese	4	No Depression	10	Anxiety	12	No Stress	No	No	5.2	129	78	5	1.4	3.16	1.2	No	No	No	No	No	No	0	0
157	109.172	1_Johor	SMK SULTAN ALAUDDIN	48	Female	Malay	Degree	Married	Yes	No	High	120	No Sedentary	<2	>=3	Inadequate	6	< 7 hrs	93	Central obese	4	No Depression	4	No Anxiety	2	No Stress	No	No	10.4	140.904	86.0769	5	1.3	3.11	1.3	Yes	No	Yes	No	Yes	No		1
159	109.172	1_Johor	SMK SULTAN ALAUDDIN	31	Female	Malay	Degree	Married	No	No	Moderate	120	No Sedentary	>=2	<3	Inadequate	6.5	< 7 hrs	74	No central obese	2	No Depression	14	Anxiety	12	No Stress	No	No	4.8	107	78	4.4	0.5	2.37	1.8	No	No	No	No	No	No	0	0
160	109.172	1_Johor	SMK SULTAN ALAUDDIN	30	Female	Malay	Degree	Single	No	No	Moderate	180	No Sedentary	<2	<3	Inadequate	6	< 7 hrs	92	Central obese	10	Depression	8	Anxiety	8	No Stress	No	No	4.9	129	87	5.8	1.6	3.97	1.1	No	No	No	No	No	No	0	0
162	109.172	1_Johor	SMK SULTAN ALAUDDIN	48	Male	Malay	Degree	Married	Yes	No	Moderate	164	No Sedentary	>=2	>=3	Adequate	5.5	< 7 hrs	106	Central obese	0	No Depression	6	No Anxiety	8	No Stress	Yes	No	5	156	87	5.9	1.4	3.86	1.4	No	No	No	No	Yes	Yes	0	0
164	109.172	1_Johor	SMK SULTAN ALAUDDIN	33	Female	Malay	Degree	Married	No	No	Moderate	120	No Sedentary	>=2	<3	Inadequate	6.5	< 7 hrs	83	Central obese	2	No Depression	16	Anxiety	12	No Stress	No	No	4.7	116	72.6731	4.8	1.1	3.1	1.2	No	No	No	No	No	No	0	0
165	109.172	1_Johor	SMK SULTAN ALAUDDIN	34	Male	Malay	Master and above	Married	Yes	No	Low	480	No Sedentary	<2	<3	Inadequate	6	< 7 hrs	102	Central obese	6	No Depression	10	Anxiety	14	Stress	No	No	5.5	124	76	5.4	1.1	3.7	1.2	No	No	No	No	No	Yes	0	0
166	109.172	1_Johor	SMK SULTAN ALAUDDIN	41	Female	Malay	Degree	Married	Yes	No	High	360	No Sedentary	<2	<3	Inadequate	5.5	< 7 hrs	102	Central obese	4	No Depression	8	Anxiety	10	No Stress	No	No	5.3	131	80	5.8	1.3	4.11	1.1	No	No	No	No	No	No	0	0
167	109.172	1_Johor	SMK SULTAN ALAUDDIN	37	Male	Malay	Diploma and below	Married	No	No	Low	186	No Sedentary	<2	<3	Inadequate	7	7 hrs and above	94.2731	Central obese	14	Depression	14	Anxiety	18	Stress	No	No	5.4	144	99	5	1.6	3.37	0.9	No	No	No	No	No	No	0	0
168	109.172	1_Johor	SMK SULTAN ALAUDDIN	52	Male	Malay	Degree	Married	No	No	High	164	No Sedentary	<2	<3	Inadequate	7	7 hrs and above	71	No central obese	0	No Depression	0	No Anxiety	0	No Stress	No	No	5	114	79	5	0.5	3.27	1.5	No	No	No	No	No	No	0	0
169	109.172	1_Johor	SMK SULTAN ALAUDDIN	28	Female	Malay	Degree	Single	No	No	Moderate	60	No Sedentary	<2	<3	Inadequate	5.5	< 7 hrs	87	Central obese	8	No Depression	10	Anxiety	4	No Stress	No	No	5.1	155	83.4808	4.5	1	2.85	1.2	No	No	No	No	No	No	0	0
170	109.172	1_Johor	SMK SULTAN ALAUDDIN	42	Female	Malay	Degree	Married	Yes	No	High	360	No Sedentary	<2	<3	Inadequate	5.5	< 7 hrs	80	Central obese	4	No Depression	8	Anxiety	14	Stress	No	No	5	118	70	5.8	0.8	3.84	1.6	No	No	No	No	No	No	0	0
171	109.172	1_Johor	SMK SULTAN ALAUDDIN	39	Female	Malay	Degree	Married	No	No	High	120	No Sedentary	>=2	<3	Inadequate	5	< 7 hrs	85	Central obese	0	No Depression	6	No Anxiety	2	No Stress	No	No	5.2	110	78	5	0.6	3.13	1.6	No	No	No	No	No	No	0	0
172	109.172	1_Johor	SMK SULTAN ALAUDDIN	31	Female	Malay	Degree	Married	Yes	No	Moderate	30	No Sedentary	<2	<3	Inadequate	6	< 7 hrs	89	Central obese	0	No Depression	6	No Anxiety	6	No Stress	No	No	5.2	105	66	5.4	0.5	3.77	1.4	No	No	No	No	No	No	0	0
173	109.172	1_Johor	SMK SULTAN ALAUDDIN	34	Male	Malay	Master and above	Married	Yes	No	High	60	No Sedentary	>=2	<3	Inadequate	7.5	7 hrs and above	87	No central obese	2	No Depression	10	Anxiety	4	No Stress	No	No	5.2	113	66	4.6	1.4	2.96	1	No	No	No	No	No	No	0	0
174	109.172	1_Johor	SMK SULTAN ALAUDDIN	33	Female	Malay	Degree	Married	No	No	Moderate	20	No Sedentary	<2	>=3	Inadequate	6	< 7 hrs	67	No central obese	4	No Depression	10	Anxiety	6	No Stress	No	No	4.9	124	81	4.8	0.8	3.04	1.4	No	No	No	No	No	No	0	0
175	109.172	1_Johor	SMK SULTAN ALAUDDIN	41	Female	Malay	Degree	Divorced/Widowed	Yes	No	Low	120	No Sedentary	<2	<3	Inadequate	8	7 hrs and above	99	Central obese	0	No Depression	4	No Anxiety	8	No Stress	No	No	4.7	132	97	4.4	1.9	2.34	1.2	No	No	No	No	No	No	0	0
177	109.172	1_Johor	SMK SULTAN ALAUDDIN	37	Female	Malay	Degree	Married	Yes	No	Moderate	180	No Sedentary	<2	<3	Inadequate	4.5	< 7 hrs	91	Central obese	2	No Depression	4	No Anxiety	6	No Stress	No	No	5.1	102	67	4.9	1.1	3.2	1.2	No	No	No	No	No	No	0	0
178	109.172	1_Johor	SMK SULTAN ALAUDDIN	54	Male	Malay	Degree	Married	No	No	High	600	sedentary	<2	>=3	Inadequate	4	< 7 hrs	94	Central obese	22	Depression	18	Anxiety	22	Stress	No	No	5.1	118	81	4.9	2.5	2.86	0.9	No	No	No	No	No	No	0	0
179	109.172	1_Johor	SMK SULTAN ALAUDDIN	29	Female	Malay	Diploma and below	Married	Yes	No	High	180	No Sedentary	>=2	>=3	Adequate	5.5	< 7 hrs	70	No central obese	0	No Depression	4	No Anxiety	4	No Stress	No	No	4.2	108	66	5	0.7	3.08	1.6	No	No	No	No	No	No	0	0
180	109.172	1_Johor	SMK SULTAN ALAUDDIN	43	Female	Malay	Degree	Married	Yes	No	Low	184	No Sedentary	<2	<3	Inadequate	5	< 7 hrs	83	Central obese	0	No Depression	0	No Anxiety	4	No Stress	No	No	4.6	121	70	4.8	1	3.15	1.2	No	No	No	No	No	No	0	0
181	109.172	1_Johor	SMK SULTAN ALAUDDIN	28	Female	Malay	Diploma and below	Married	Yes	No	Low	30	No Sedentary	<2	<3	Inadequate	6.5	< 7 hrs	76	No central obese	10	Depression	14	Anxiety	8	No Stress	No	No	4.8	110	63	4.3	0.6	2.73	1.3	No	No	No	No	No	No	0	0
182	109.172	1_Johor	SMK SULTAN ALAUDDIN	49	Female	Malay	Degree	Married	Yes	No	Low	300	No Sedentary	<2	<3	Inadequate	6.5	< 7 hrs	78	No central obese	4	No Depression	10	Anxiety	12	No Stress	No	Yes	5.8	123	85	5.7	1.2	3.86	1.3	No	Yes	No	No	No	No	1	0
183	109.172	1_Johor	SMK SULTAN ALAUDDIN	54	Female	Malay	Diploma and below	Married	Yes	No	Low	60	No Sedentary	<2	<3	Inadequate	6.5	< 7 hrs	68	No central obese	0	No Depression	0	No Anxiety	4	No Stress	No	No	4.9	120	74	5.8	1	3.45	1.9	No	No	No	No	No	No	0	0
185	109.172	1_Johor	SMK SULTAN ALAUDDIN	36	Female	Malay	Degree	Married	Yes	No	Low	183	No Sedentary	<2	<3	Inadequate	6.36538	< 7 hrs	98	Central obese	8	No Depression	4	No Anxiety	14	Stress	No	No	5.1	113	73	3.7	0.6	2.03	1.4	No	No	No	No	No	No	0	0
186	109.172	1_Johor	SMK SULTAN ALAUDDIN	49	Female	Malay	Degree	Divorced/Widowed	Yes	No	Low	180	No Sedentary	>=2	>=3	Adequate	8	7 hrs and above	93	Central obese	14	Depression	12	Anxiety	12	No Stress	No	No	5.9	121	76	6.6	1.2	4.56	1.5	No	Yes	No	No	No	Yes	1	0
187	109.172	1_Johor	SMK SULTAN ALAUDDIN	40	Female	Malay	Degree	Married	Yes	No	Low	60	No Sedentary	<2	<3	Inadequate	6.5	< 7 hrs	76	No central obese	6	No Depression	0	No Anxiety	10	No Stress	No	No	4.7	134	83	5.6	1.3	3.61	1.4	No	No	No	No	No	No	0	0
188	243.738	1_Johor	SMK TAMAN TUN AMINAH	47	Female	Malay	Degree	Married	Yes	No	Low	300	No Sedentary	<2	>=3	Inadequate	6	< 7 hrs	88	Central obese	8	No Depression	10	Anxiety	12	No Stress	No	No	6.4	125	88	3.7	0.5	2.57	0.9	No	Yes	No	No	No	No		1
190	243.738	1_Johor	SMK TAMAN TUN AMINAH	28	Female	Malay	Degree	Married	Yes	No	High	10	No Sedentary	<2	<3	Inadequate	8.5	7 hrs and above	80	Central obese	0	No Depression	2	No Anxiety	4	No Stress	No	No	4.7	114	73	4.8	0.9	3.09	1.3	No	No	No	No	No	No	0	0
191	243.738	1_Johor	SMK TAMAN TUN AMINAH	34	Female	Other races	Degree	Married	Yes	No	Moderate	180	No Sedentary	<2	<3	Inadequate	5.5	< 7 hrs	104	Central obese	0	No Depression	4	No Anxiety	3	No Stress	No	No	5	139	89	6.6	2.2	4.2	1.4	No	No	Yes	Yes	No	Yes		1
193	243.738	1_Johor	SMK TAMAN TUN AMINAH	41	Female	Indian	Degree	Married	No	No	Low	60	No Sedentary	<2	>=3	Inadequate	5.5	< 7 hrs	84	Central obese	0	No Depression	2	No Anxiety	8	No Stress	No	No	5.7	137	77	5.9	1.3	4.11	1.2	No	Yes	No	No	No	No	1	0
194	243.738	1_Johor	SMK TAMAN TUN AMINAH	59	Male	Indian	Degree	Married	Yes	No	High	330	No Sedentary	>=2	<3	Inadequate	6.5	< 7 hrs	98	Central obese	14	Depression	12	Anxiety	14	Stress	No	Yes	8.1	127	85	4.8	1.4	2.96	1.2	Yes	No	Yes	Yes	No	Yes		1
195	243.738	1_Johor	SMK TAMAN TUN AMINAH	28	Male	Malay	Degree	Married	No	No	High	480	No Sedentary	<2	<3	Inadequate	4.64856	< 7 hrs	103	Central obese	0	No Depression	2	No Anxiety	4	No Stress	No	No	4.8	149	92	5.7	0.8	3.74	1.6	No	No	No	No	No	No	0	0
196	243.738	1_Johor	SMK TAMAN TUN AMINAH	33	Female	Malay	Degree	Married	No	Yes	Low	195	No Sedentary	<2	<3	Inadequate	5.5	< 7 hrs	76	No central obese	6	No Depression	8	Anxiety	12	No Stress	No	No	4.3	135	81	4.8	0.8	3.04	1.4	No	No	No	No	No	No	0	0
197	243.738	1_Johor	SMK TAMAN TUN AMINAH	52	Female	Chinese	Master and above	Married	No	No	Moderate	300	No Sedentary	>=2	<3	Inadequate	7.5	7 hrs and above	64	No central obese	8	No Depression	8	Anxiety	12	No Stress	No	No	5.5	121.019	72	5.5	0.6	2.93	2.3	No	No	No	No	No	No	0	0
198	243.738	1_Johor	SMK TAMAN TUN AMINAH	43	Female	Malay	Degree	Married	No	No	Low	160	No Sedentary	<2	<3	Inadequate	7.5	7 hrs and above	80	Central obese	6	No Depression	8	Anxiety	10	No Stress	No	No	4.6	119	72	5.1	0.6	3.23	1.6	No	No	No	No	No	No	0	0
199	243.738	1_Johor	SMK TAMAN TUN AMINAH	38	Female	Malay	Degree	Married	No	No	Low	170	No Sedentary	<2	<3	Inadequate	6.5	< 7 hrs	81	Central obese	6	No Depression	8	Anxiety	16	Stress	No	No	4.6	116	73	4.6	0.8	2.54	1.7	No	No	No	No	No	No	0	0
200	243.738	1_Johor	SMK TAMAN TUN AMINAH	34	Male	Malay	Degree	Married	Yes	No	Moderate	120	No Sedentary	<2	<3	Inadequate	5	< 7 hrs	103	Central obese	0	No Depression	2	No Anxiety	2	No Stress	No	No	5	130	80	4.7	1.5	2.92	1.1	No	No	No	No	No	No	0	0
203	243.738	1_Johor	SMK TAMAN TUN AMINAH	36	Male	Malay	Degree	Single	Yes	No	High	10	No Sedentary	<2	<3	Inadequate	6.5	< 7 hrs	71	No central obese	0	No Depression	2	No Anxiety	4	No Stress	No	No	4.9	135	92	5.04423	0.7	1.88	0.9	No	No	No	No	No	No	0	0
204	243.738	1_Johor	SMK TAMAN TUN AMINAH	40	Female	Indian	Degree	Married	Yes	No	Low	194	No Sedentary	<2	<3	Inadequate	8.5	7 hrs and above	79	No central obese	2	No Depression	7	Anxiety	4	No Stress	No	No	5	117	80	7.1	1.1	4.4	2.2	No	No	No	No	No	No	0	0
205	243.738	1_Johor	SMK TAMAN TUN AMINAH	33	Female	Malay	Degree	Single	No	No	Low	120	No Sedentary	<2	<3	Inadequate	6.5	< 7 hrs	77	No central obese	4	No Depression	12	Anxiety	12	No Stress	No	No	5.3	137	97	4.8	1	3.15	1.2	No	No	No	No	No	No	0	0
206	243.738	1_Johor	SMK TAMAN TUN AMINAH	42	Female	Malay	Degree	Married	No	No	Low	270	No Sedentary	<2	<3	Inadequate	6.5	< 7 hrs	74	No central obese	8	No Depression	0	No Anxiety	4	No Stress	No	No	4.4	127	80	5.3	0.7	3.08	1.9	No	No	No	No	No	No	0	0
207	243.738	1_Johor	SMK TAMAN TUN AMINAH	32	Female	Malay	Degree	Married	Yes	No	Low	188	No Sedentary	<2	<3	Inadequate	6.5	< 7 hrs	102	Central obese	10	Depression	10	Anxiety	12	No Stress	No	No	5.2	136	86	8.1	1.4	5.66	1.8	No	No	No	No	No	No	0	0
209	243.738	1_Johor	SMK TAMAN TUN AMINAH	26	Female	Malay	Degree	Married	Yes	No	Low	200	No Sedentary	<2	<3	Inadequate	7	7 hrs and above	80	Central obese	8	No Depression	2	No Anxiety	8	No Stress	No	No	4.90192	99	71	4.85769	1.1	1.7	0.9	No	No	No	No	No	No	0	0
210	243.738	1_Johor	SMK TAMAN TUN AMINAH	47	Female	Malay	Degree	Married	Yes	No	High	180	No Sedentary	<2	<3	Inadequate	4.5	< 7 hrs	85	Central obese	4	No Depression	6	No Anxiety	4	No Stress	No	No	5	128	75	4.7	1.2	2.86	1.3	No	No	No	No	No	No	0	0
211	243.738	1_Johor	SMK TAMAN TUN AMINAH	34	Female	Malay	Degree	Married	Yes	No	Low	188	No Sedentary	>=2	<3	Inadequate	7	7 hrs and above	81	Central obese	8	No Depression	10	Anxiety	14	Stress	No	No	4.8	127	85	4.7	0.6	3.23	1.2	No	No	No	No	No	No	0	0
212	243.738	1_Johor	SMK TAMAN TUN AMINAH	37	Female	Malay	Degree	Married	Yes	No	Low	30	No Sedentary	<2	<3	Inadequate	7.72115	7 hrs and above	107	Central obese	0	No Depression	0	No Anxiety	0	No Stress	No	No	4.7	134	84	5.5	1.5	3.82	1	No	No	No	No	No	No	0	0
213	243.738	1_Johor	SMK TAMAN TUN AMINAH	30	Female	Malay	Degree	Married	Yes	No	Low	120	No Sedentary	<2	<3	Inadequate	6.5	< 7 hrs	74	No central obese	4	No Depression	8	Anxiety	8	No Stress	No	No	4.5	115	75	5.8	0.8	3.84	1.6	No	No	No	No	No	No	0	0
215	243.738	1_Johor	SMK TAMAN TUN AMINAH	46	Female	Chinese	Degree	Married	No	No	High	198	No Sedentary	<2	<3	Inadequate	7.5	7 hrs and above	79	No central obese	14	Depression	16	Anxiety	16	Stress	No	No	5.2	127	88	5.3	0.9	3.39	1.5	No	No	No	No	No	No	0	0
216	243.738	1_Johor	SMK TAMAN TUN AMINAH	50	Female	Chinese	Degree	Married	No	No	Moderate	300	No Sedentary	<2	<3	Inadequate	6.5	< 7 hrs	73	No central obese	6	No Depression	0	No Anxiety	6	No Stress	No	No	5.2	127	84	6	0.9	3.59	2	No	No	No	No	No	No	0	0
217	123.368	1_Johor	SMK SRI PERHENTIAN	46	Female	Malay	Degree	Married	Yes	No	Moderate	180	No Sedentary	<2	<3	Inadequate	5.5	< 7 hrs	73	No central obese	0	No Depression	0	No Anxiety	6	No Stress	No	No	4.9	141	74	5.9	0.8	3.84	1.7	No	No	No	No	No	No	0	0
218	123.368	1_Johor	SMK SRI PERHENTIAN	44	Female	Malay	Degree	Married	No	No	Moderate	240	No Sedentary	<2	<3	Inadequate	6.19038	< 7 hrs	72	No central obese	0	No Depression	10	Anxiety	4	No Stress	Yes	No	4.8	105	60	5.9	0.7	3.48	2.1	No	No	No	No	No	No	0	0
219	123.368	1_Johor	SMK SRI PERHENTIAN	26	Female	Chinese	Degree	Single	Yes	No	Moderate	268	No Sedentary	<2	<3	Inadequate	7	7 hrs and above	82	Central obese	18	Depression	22	Anxiety	26	Stress	No	No	5	130	74	3.7	0.6	2.43	1	No	No	No	No	Yes	No	0	0
221	123.368	1_Johor	SMK SRI PERHENTIAN	42	Female	Chinese	Degree	Married	No	No	Low	420	No Sedentary	<2	<3	Inadequate	8.5	7 hrs and above	81	Central obese	10	Depression	8	Anxiety	18	Stress	No	No	5	112	64	5.7	1.3	3.71	1.4	No	No	No	No	No	No	0	0
222	123.368	1_Johor	SMK SRI PERHENTIAN	36	Female	Malay	Master and above	Married	No	No	High	120	No Sedentary	<2	<3	Inadequate	5.5	< 7 hrs	76	No central obese	0	No Depression	2	No Anxiety	0	No Stress	No	No	4.2	106	62	4.8	0.8	3.04	1.4	No	No	No	No	No	No	0	0
223	123.368	1_Johor	SMK SRI PERHENTIAN	42	Female	Malay	Degree	Married	Yes	No	Low	90	No Sedentary	<2	<3	Inadequate	6.5	< 7 hrs	67	No central obese	6	No Depression	8	Anxiety	8	No Stress	No	No	4.7	104	65	4.9	0.7	2.28	2.3	No	No	No	No	No	No	0	0
224	123.368	1_Johor	SMK SRI PERHENTIAN	42	Female	Malay	Degree	Married	Yes	Yes	Low	120	No Sedentary	<2	<3	Inadequate	6	< 7 hrs	81	Central obese	6	No Depression	4	No Anxiety	14	Stress	No	No	6.8	163	105	5.8	1.3	4.01	1.2	No	No	Yes	No	Yes	No		1
226	123.368	1_Johor	SMK SRI PERHENTIAN	41	Female	Malay	Degree	Married	Yes	No	Low	151	No Sedentary	<2	<3	Inadequate	5.5	< 7 hrs	78	No central obese	4	No Depression	12	Anxiety	8	No Stress	No	No	4.3	104	67	4	0.5	2.37	1.4	No	No	No	No	No	No	0	0
227	123.368	1_Johor	SMK SRI PERHENTIAN	43	Male	Malay	Degree	Married	No	No	Low	180	No Sedentary	<2	<3	Inadequate	5.72115	< 7 hrs	109	Central obese	10	Depression	4	No Anxiety	10	No Stress	No	No	5.3	134	78	8	2	5.79	1.3	No	No	No	No	No	No	0	0
228	123.368	1_Johor	SMK SRI PERHENTIAN	55	Female	Malay	Degree	Married	No	No	Low	191	No Sedentary	<2	<3	Inadequate	5.5	< 7 hrs	81	Central obese	0	No Depression	6	No Anxiety	6	No Stress	No	No	6.1	118	71.9423	5.4	0.5	3.37	1.8	No	Yes	No	No	No	No		1
229	123.368	1_Johor	SMK SRI PERHENTIAN	51	Female	Malay	Degree	Married	No	No	High	90	No Sedentary	>=2	<3	Inadequate	6	< 7 hrs	86	Central obese	10	Depression	12	Anxiety	10	No Stress	No	No	5.8	136	81	5.3	0.8	3.64	1.3	No	Yes	No	No	No	No	1	0
231	98.99	1_Johor	SMK AIR TAWAR	32	Male	Malay	Degree	Married	Yes	No	Moderate	224	No Sedentary	<2	<3	Inadequate	7	7 hrs and above	73	No central obese	2	No Depression	8	Anxiety	4	No Stress	No	No	4.9	117	72	4.6	0.8	2.24	2	No	No	No	No	No	No	0	0
232	98.99	1_Johor	SMK AIR TAWAR	49	Male	Malay	Degree	Married	Yes	No	Low	193	No Sedentary	<2	<3	Inadequate	6	< 7 hrs	87	No central obese	6	No Depression	6	No Anxiety	6	No Stress	No	No	5.8	141	96	5.7	1.3	4.07	1.04	No	Yes	No	No	Yes	Yes	1	0
233	98.99	1_Johor	SMK AIR TAWAR	29	Male	Malay	Degree	Married	Yes	No	Low	170	No Sedentary	<2	<3	Inadequate	5.5	< 7 hrs	91	Central obese	8	No Depression	10	Anxiety	16	Stress	No	No	4.6	129	82	5.8	0.6	4.01	1.52	No	No	No	No	No	No	0	0
234	98.99	1_Johor	SMK AIR TAWAR	35	Female	Malay	Master and above	Married	Yes	No	High	250	No Sedentary	<2	<3	Inadequate	6.5	< 7 hrs	68	No central obese	0	No Depression	6	No Anxiety	4	No Stress	No	No	4.9	114	63	5.7	0.6	2.68	1.64596	No	No	No	No	No	No	0	0
235	98.99	1_Johor	SMK AIR TAWAR	46	Male	Malay	Degree	Married	Yes	No	Low	146	No Sedentary	<2	<3	Inadequate	7	7 hrs and above	88.5	No central obese	0	No Depression	0	No Anxiety	0	No Stress	No	No	4.9	117	67	5	1	3.47	1.08	No	No	No	No	No	No	0	0
236	98.99	1_Johor	SMK AIR TAWAR	32	Male	Malay	Degree	Married	Yes	No	Low	193	No Sedentary	<2	<3	Inadequate	6.5	< 7 hrs	85	No central obese	0	No Depression	4	No Anxiety	2	No Stress	No	No	5.3	124	67	5.6	0.8	3.24	2	No	No	No	No	No	No	0	0
237	98.99	1_Johor	SMK AIR TAWAR	41	Male	Malay	Degree	Married	Yes	No	Moderate	182	No Sedentary	<2	<3	Inadequate	5	< 7 hrs	96.5	Central obese	12	Depression	12	Anxiety	18	Stress	No	No	6.1	128	79	5.8	1.1	4.01	1.29	No	Yes	No	No	No	No		1
241	98.99	1_Johor	SMK AIR TAWAR	36	Male	Malay	Degree	Married	Yes	No	Low	60	No Sedentary	<2	<3	Inadequate	6	< 7 hrs	92	Central obese	2	No Depression	6	No Anxiety	10	No Stress	No	No	4.7	132	95	5.2	0.5	3.19	1.78	No	No	No	No	No	No	0	0
243	98.99	1_Johor	SMK AIR TAWAR	36	Male	Malay	Degree	Married	No	No	Low	180	No Sedentary	<2	<3	Inadequate	5	< 7 hrs	65	No central obese	4	No Depression	16	Anxiety	8	No Stress	Yes	No	4.7	121	73.6154	5.8	0.8	3.68	1.76	No	No	No	No	No	No	0	0
244	98.99	1_Johor	SMK AIR TAWAR	35	Male	Malay	Degree	Married	No	No	Low	60	No Sedentary	<2	<3	Inadequate	6	< 7 hrs	92	Central obese	2	No Depression	2	No Anxiety	4	No Stress	No	No	5.1	142	87	6.2	1.6	4.12	1.35	No	No	No	No	No	No	0	0
246	960.137	1_Johor	SMK TAMAN DESA TEBRAU	44	Female	Malay	Degree	Married	Yes	No	High	120	No Sedentary	<2	<3	Inadequate	6	< 7 hrs	104	Central obese	2	No Depression	0	No Anxiety	4	No Stress	No	No	4.6	156	87	5.2	1.5	3.42	1.1	No	No	No	No	No	No	0	0
247	960.137	1_Johor	SMK TAMAN DESA TEBRAU	32	Female	Malay	Degree	Married	Yes	No	High	120	No Sedentary	<2	<3	Inadequate	8	7 hrs and above	81	Central obese	4	No Depression	4	No Anxiety	10	No Stress	No	No	5	118	80	4.96538	0.6	2.23	1	No	No	No	No	No	No	0	0
248	960.137	1_Johor	SMK TAMAN DESA TEBRAU	33	Female	Malay	Degree	Married	Yes	No	Low	184	No Sedentary	<2	<3	Inadequate	6.5	< 7 hrs	63	No central obese	20	Depression	26	Anxiety	24	Stress	No	No	5.1	107	70	4.4	0.8	2.64	1.4	No	No	No	No	No	No	0	0
249	960.137	1_Johor	SMK TAMAN DESA TEBRAU	50	Female	Chinese	Degree	Married	Yes	No	High	300	No Sedentary	<2	<3	Inadequate	6	< 7 hrs	88	Central obese	10	Depression	8	Anxiety	10	No Stress	No	No	4.7	129	74	4.6	1.7	2.83	1	No	No	No	No	No	Yes	0	0
250	960.137	1_Johor	SMK TAMAN DESA TEBRAU	28	Female	Malay	Degree	Single	No	No	Moderate	243	No Sedentary	<2	<3	Inadequate	6.5	< 7 hrs	74	No central obese	16	Depression	24	Anxiety	16	Stress	No	No	5.3	125	87	4.4	0.8	2.34	1.7	No	No	No	No	No	No	0	0
251	960.137	1_Johor	SMK TAMAN DESA TEBRAU	25	Female	Malay	Degree	Single	Yes	No	High	260	No Sedentary	<2	>=3	Inadequate	5	< 7 hrs	77	No central obese	4	No Depression	4	No Anxiety	2	No Stress	No	No	4.4	126	82	5.2	1.6	2.97	1.5	No	No	No	No	No	No	0	0
253	960.137	1_Johor	SMK TAMAN DESA TEBRAU	24	Female	Malay	Degree	Single	No	No	Moderate	120	No Sedentary	<2	<3	Inadequate	7.5	7 hrs and above	69	No central obese	8	No Depression	6	No Anxiety	8	No Stress	No	No	4.3	118	68	4.5	0.6	2.63	1.6	No	No	No	No	No	No	0	0
254	960.137	1_Johor	SMK TAMAN DESA TEBRAU	33	Female	Malay	Degree	Single	No	No	Low	120	No Sedentary	<2	<3	Inadequate	6	< 7 hrs	72	No central obese	0	No Depression	2	No Anxiety	4	No Stress	No	No	4.6	118	73	6	0.7	3.68	2	No	No	No	No	No	No	0	0
255	72.899	1_Johor	SMK AYER BALOI	46	Female	Malay	Degree	Married	No	No	Moderate	120	No Sedentary	<2	<3	Inadequate	6.5	< 7 hrs	69	No central obese	4	No Depression	6	No Anxiety	8	No Stress	No	No	5.1	115	68	5.8	1	3.95	1.4	No	No	No	No	No	No	0	0
256	72.899	1_Johor	SMK AYER BALOI	34	Female	Malay	Degree	Married	Yes	No	Low	267	No Sedentary	<2	<3	Inadequate	7	7 hrs and above	70	No central obese	2	No Depression	8	Anxiety	8	No Stress	No	No	5.2	110	71	5	0.6	3.33	1.4	No	No	No	No	No	No	0	0
257	72.899	1_Johor	SMK AYER BALOI	47	Female	Malay	Degree	Married	Yes	No	Low	165	No Sedentary	<2	<3	Inadequate	5.5	< 7 hrs	82	Central obese	0	No Depression	0	No Anxiety	2	No Stress	No	No	6.1	136	82	5.4	1	3.45	1.5	No	Yes	No	No	No	No		1
258	72.899	1_Johor	SMK AYER BALOI	45	Female	Malay	Degree	Married	Yes	Yes	Low	840	sedentary	<2	<3	Inadequate	6	< 7 hrs	79	No central obese	0	No Depression	4	No Anxiety	2	No Stress	No	No	5.1	147	73	4.9	0.7	3.18	1.4	No	No	No	No	No	No	0	0
259	72.899	1_Johor	SMK AYER BALOI	50	Female	Malay	Degree	Married	Yes	No	Moderate	180	No Sedentary	<2	<3	Inadequate	5	< 7 hrs	78	No central obese	0	No Depression	4	No Anxiety	4	No Stress	No	No	5.2	119	64	5.6	0.5	3.07	2.3	No	No	No	No	No	Yes	0	0
260	72.899	1_Johor	SMK AYER BALOI	54	Female	Malay	Degree	Married	No	No	Low	180	No Sedentary	<2	<3	Inadequate	5.5	< 7 hrs	65	No central obese	2	No Depression	8	Anxiety	8	No Stress	No	No	4.7	133	70	4	0.7	2.58	1.1	No	No	No	No	No	No	0	0
261	72.899	1_Johor	SMK AYER BALOI	32	Female	Malay	Degree	Married	Yes	Yes	Low	240	No Sedentary	<2	<3	Inadequate	7.5	7 hrs and above	62	No central obese	4	No Depression	2	No Anxiety	4	No Stress	No	No	4.6	107	71	5.2	0.5	3.37	1.6	No	No	No	No	No	No	0	0
262	72.899	1_Johor	SMK AYER BALOI	38	Male	Malay	Degree	Married	No	No	High	180	No Sedentary	>=2	<3	Inadequate	6	< 7 hrs	115	Central obese	4	No Depression	0	No Anxiety	2	No Stress	No	No	6.2	153	94	5.9	1	3.85	1.6	No	Yes	No	No	Yes	Yes		1
263	72.899	1_Johor	SMK AYER BALOI	54	Male	Malay	Degree	Married	No	No	Low	203	No Sedentary	<2	<3	Inadequate	5.5	< 7 hrs	91	Central obese	0	No Depression	0	No Anxiety	0	No Stress	No	No	6.2	146	90	5.4	1.7	3.53	1.1	No	Yes	No	No	Yes	Yes		1
264	72.899	1_Johor	SMK AYER BALOI	39	Male	Malay	Degree	Married	Yes	No	Moderate	180	No Sedentary	<2	<3	Inadequate	8.5	7 hrs and above	94	Central obese	8	No Depression	16	Anxiety	18	Stress	No	No	4.9	127	82	5.1	1.3	3.11	1.4	No	No	No	No	No	No	0	0
265	72.899	1_Johor	SMK AYER BALOI	28	Female	Malay	Degree	Married	No	No	Moderate	300	No Sedentary	>=2	<3	Inadequate	6	< 7 hrs	60	No central obese	4	No Depression	2	No Anxiety	4	No Stress	No	No	4.4	108	74	4.1	0.8	2.44	1.3	No	No	No	No	No	No	0	0
266	72.899	1_Johor	SMK AYER BALOI	51	Female	Malay	Degree	Married	No	No	Low	780	sedentary	<2	>=3	Inadequate	5.5	< 7 hrs	97	Central obese	8	No Depression	12	Anxiety	14	Stress	No	No	5.3	146	74	5.4	1.3	3.71	1.1	No	No	No	No	No	No	0	0
267	72.899	1_Johor	SMK AYER BALOI	46	Male	Malay	Degree	Married	Yes	No	High	120	No Sedentary	<2	<3	Inadequate	5	< 7 hrs	99	Central obese	4	No Depression	8	Anxiety	6	No Stress	Yes	No	10.1	125	85	5	1.61538	2.4	1.1	Yes	No	Yes	No	No	Yes		1
268	72.899	1_Johor	SMK AYER BALOI	51	Female	Malay	Degree	Married	Yes	No	Low	120	No Sedentary	<2	<3	Inadequate	7	7 hrs and above	95	Central obese	4	No Depression	6	No Anxiety	12	No Stress	No	No	5.8	124	76	7.8	2.1	5.35	1.5	No	Yes	No	No	No	Yes	1	0
269	72.899	1_Johor	SMK AYER BALOI	42	Female	Malay	Degree	Married	No	No	Moderate	240	No Sedentary	<2	<3	Inadequate	6	< 7 hrs	102	Central obese	6	No Depression	16	Anxiety	16	Stress	No	No	5.3	135	95	6.7	1.5	4.62	1.4	No	No	No	No	No	Yes	0	0
270	72.899	1_Johor	SMK AYER BALOI	30	Male	Malay	Degree	Married	Yes	No	High	240	No Sedentary	<2	<3	Inadequate	5.5	< 7 hrs	81	No central obese	2	No Depression	2	No Anxiety	4	No Stress	No	No	4.7	135	84	4.4	0.6	2.73	1.4	No	No	No	No	No	No	0	0
271	72.899	1_Johor	SMK AYER BALOI	49	Male	Malay	Degree	Married	Yes	No	Low	183	No Sedentary	<2	<3	Inadequate	6.17913	< 7 hrs	95	Central obese	2	No Depression	8	Anxiety	10	No Stress	No	No	7.2	144	75	4.1	1.1	2.2	1.4	Yes	No	Yes	Yes	No	Yes		1
272	72.899	1_Johor	SMK AYER BALOI	27	Female	Malay	Degree	Single	Yes	No	Low	720	sedentary	<2	<3	Inadequate	6.5	< 7 hrs	64	No central obese	10	Depression	4	No Anxiety	20	Stress	No	No	4.9	122	77	5.7	0.7	3.68	1.7	No	No	No	No	No	No	0	0
273	72.899	1_Johor	SMK AYER BALOI	27	Male	Malay	Degree	Single	Yes	No	Low	173	No Sedentary	<2	<3	Inadequate	6	< 7 hrs	90	Central obese	2	No Depression	8	Anxiety	8	No Stress	No	No	4.7	124	94	4.7	1.3	2.81	1.3	No	No	No	No	No	No	0	0
274	72.899	1_Johor	SMK AYER BALOI	46	Female	Malay	Degree	Married	No	No	Low	156	No Sedentary	<2	<3	Inadequate	6	< 7 hrs	62	No central obese	2	No Depression	10	Anxiety	10	No Stress	No	No	4.9	135	77	4.2	0.7	2.48	1.4	No	No	No	No	No	No	0	0
275	72.899	1_Johor	SMK AYER BALOI	44	Female	Malay	Degree	Married	No	No	Moderate	300	No Sedentary	<2	<3	Inadequate	5.5	< 7 hrs	82	Central obese	2	No Depression	0	No Anxiety	2	No Stress	No	No	4.9	122	72	4.7	1	2.95	1.3	No	No	No	No	No	No	0	0
276	72.899	1_Johor	SMK AYER BALOI	39	Female	Malay	Degree	Married	Yes	No	High	200	No Sedentary	<2	<3	Inadequate	6	< 7 hrs	63	No central obese	4	No Depression	10	Anxiety	8	No Stress	No	No	4.7	118	73	5.8	1.2	3.56	1.7	No	No	No	No	No	No	0	0
277	111.898	1_Johor	SMK BANDAR T6	43	Female	Malay	Degree	Married	No	No	High	201	No Sedentary	<2	<3	Inadequate	7	7 hrs and above	91.5	Central obese	12	Depression	11	Anxiety	8	No Stress	No	No	5.2	124	69	5.8	1.5	4.02	1.1	No	No	No	No	No	No	0	0
279	111.898	1_Johor	SMK BANDAR T6	41	Female	Malay	Degree	Married	No	No	Low	120	No Sedentary	<2	<3	Inadequate	6.5	< 7 hrs	63	No central obese	8	No Depression	6	No Anxiety	10	No Stress	No	No	5.2	106	65	5.2	0.8	2.94	1.9	No	No	No	No	No	No	0	0
280	111.898	1_Johor	SMK BANDAR T6	46	Female	Malay	Degree	Married	Yes	No	Low	174	No Sedentary	<2	<3	Inadequate	6.5	< 7 hrs	73	No central obese	8	No Depression	10	Anxiety	20	Stress	No	No	5.3	124	71	5.2	0.8	3.44	1.4	No	No	No	No	No	No	0	0
282	111.898	1_Johor	SMK BANDAR T6	33	Female	Malay	Degree	Married	Yes	No	Low	30	No Sedentary	<2	<3	Inadequate	4.5	< 7 hrs	78	No central obese	10	Depression	10	Anxiety	14	Stress	No	No	4.9	100	67	4.74808	0.5	2.83538	1.5	No	No	No	No	No	No	0	0
283	111.898	1_Johor	SMK BANDAR T6	40	Female	Malay	Degree	Married	No	No	Moderate	180	No Sedentary	<2	<3	Inadequate	7.5	7 hrs and above	76	No central obese	6	No Depression	2	No Anxiety	2	No Stress	No	No	5	126	74	5.4	0.8	3.44	1.6	No	No	No	No	No	No	0	0
284	111.898	1_Johor	SMK BANDAR T6	41	Female	Malay	Degree	Married	No	No	Low	199	No Sedentary	>=2	<3	Inadequate	7	7 hrs and above	75	No central obese	8	No Depression	12	Anxiety	16	Stress	No	No	4.7	124	75	5.2	1.7	3.03	1.4	No	No	No	No	No	No	0	0
285	111.898	1_Johor	SMK BANDAR T6	30	Female	Malay	Degree	Single	Yes	No	Low	197	No Sedentary	<2	<3	Inadequate	6.5	< 7 hrs	80	Central obese	2	No Depression	3	No Anxiety	4	No Stress	No	No	5.6	129	86	6.4	1.6	4.37	1.3	No	Yes	No	No	No	No	1	0
286	111.898	1_Johor	SMK BANDAR T6	25	Female	Malay	Degree	Married	No	No	High	258	No Sedentary	<2	<3	Inadequate	8	7 hrs and above	67	No central obese	10	Depression	16	Anxiety	18	Stress	No	No	4.9	137	84	5.4	0.8	3.74	1.3	No	No	No	No	No	No	0	0
287	111.898	1_Johor	SMK BANDAR T6	44	Female	Malay	Degree	Married	Yes	No	High	60	No Sedentary	>=2	<3	Inadequate	5.5	< 7 hrs	69	No central obese	4	No Depression	4	No Anxiety	12	No Stress	No	No	4.6	116	75	4.1	0.4	2.62	1.3	No	No	No	No	No	No	0	0
288	111.898	1_Johor	SMK BANDAR T6	44	Female	Malay	Degree	Married	No	No	Moderate	120	No Sedentary	<2	>=3	Inadequate	4.5	< 7 hrs	75	No central obese	0	No Depression	0	No Anxiety	4	No Stress	No	No	4.3	113	72	4.8	1	2.45	1.52077	No	No	No	No	No	No	0	0
289	111.898	1_Johor	SMK BANDAR T6	31	Female	Malay	Degree	Married	Yes	No	Low	360	No Sedentary	<2	<3	Inadequate	6.5	< 7 hrs	68	No central obese	0	No Depression	4	No Anxiety	4	No Stress	No	No	4.7	114	77	4.3	0.6	2.43	1.6	No	No	No	No	No	No	0	0
290	111.898	1_Johor	SMK BANDAR T6	39	Female	Malay	Degree	Married	No	No	Low	80	No Sedentary	<2	<3	Inadequate	6.5	< 7 hrs	83	Central obese	12	Depression	16	Anxiety	16	Stress	No	No	5.5	124	84	6.3	1.7	4.33	1.2	No	No	No	No	No	No	0	0
291	111.898	1_Johor	SMK BANDAR T6	27	Female	Malay	Degree	Single	Yes	No	High	30	No Sedentary	<2	<3	Inadequate	7	7 hrs and above	68	No central obese	10	Depression	10	Anxiety	14	Stress	No	No	4.5	102	65	5.4	0.9	3.09	1.9	No	No	No	No	No	No	0	0
292	111.898	1_Johor	SMK BANDAR T6	36	Female	Malay	Degree	Married	No	No	High	20	No Sedentary	<2	<3	Inadequate	5.5	< 7 hrs	94	Central obese	0	No Depression	0	No Anxiety	2	No Stress	No	No	5.6	110	61	5.3	1	3.45	1.4	No	Yes	No	No	No	No	1	0
293	111.898	1_Johor	SMK BANDAR T6	40	Female	Malay	Master and above	Married	Yes	No	High	240	No Sedentary	<2	<3	Inadequate	6.5	< 7 hrs	77	No central obese	14	Depression	20	Anxiety	22	Stress	No	No	5	126	75	4.2	0.5	2.47	1.5	No	No	No	No	No	No	0	0
294	111.898	1_Johor	SMK BANDAR T6	55	Female	Malay	Degree	Married	No	No	Moderate	540	No Sedentary	>=2	>=3	Adequate	5.5	< 7 hrs	80	Central obese	1	No Depression	2	No Anxiety	4	No Stress	No	No	5.1	118	64	6.4	1.12885	4.14	1.9	No	No	No	No	No	No	0	0
295	111.898	1_Johor	SMK BANDAR T6	28	Female	Malay	Degree	Married	Yes	No	Moderate	194	No Sedentary	<2	<3	Inadequate	7	7 hrs and above	64.5	No central obese	8	No Depression	4	No Anxiety	14	Stress	No	No	4.6	92	60	3.8	0.4	2.22	1.4	No	No	No	No	No	No	0	0
296	111.898	1_Johor	SMK BANDAR T6	29	Female	Malay	Degree	Married	No	Yes	Low	120	No Sedentary	<2	<3	Inadequate	8	7 hrs and above	67	No central obese	8	No Depression	14	Anxiety	12	No Stress	No	No	4.5	113.269	72.4615	4.45962	0.5	1.97	1.3	No	No	No	No	No	No	0	0
297	111.898	1_Johor	SMK BANDAR T6	46	Female	Malay	Degree	Married	Yes	No	Low	330	No Sedentary	<2	<3	Inadequate	6.5	< 7 hrs	80	Central obese	6	No Depression	8	Anxiety	14	Stress	No	No	8.5	156	89	5.8	1.6	3.87	1.2	Yes	No	Yes	Yes	Yes	No		1
298	111.898	1_Johor	SMK BANDAR T6	50	Female	Malay	Degree	Married	Yes	No	Moderate	240	No Sedentary	<2	<3	Inadequate	6	< 7 hrs	103	Central obese	4	No Depression	4	No Anxiety	6	No Stress	No	No	9.9	135	79	8.1	2	5.59	1.6	Yes	No	Yes	Yes	No	No		1
300	111.898	1_Johor	SMK BANDAR T6	33	Female	Malay	Degree	Married	No	No	Low	60	No Sedentary	<2	<3	Inadequate	7.5	7 hrs and above	60	No central obese	6	No Depression	8	Anxiety	12	No Stress	No	No	4.5	102	69	4	0.5	2.27	1.5	No	No	No	No	No	No	0	0
301	111.898	1_Johor	SMK BANDAR T6	28	Female	Malay	Degree	Married	No	No	High	200	No Sedentary	<2	<3	Inadequate	7.5	7 hrs and above	79	No central obese	2	No Depression	2	No Anxiety	6	No Stress	No	No	4.9	120.058	74.1731	5.3	1.1	3.3	1.5	No	No	No	No	No	No	0	0
302	111.898	1_Johor	SMK BANDAR T6	30	Male	Malay	Degree	Married	Yes	No	Low	197	No Sedentary	<2	<3	Inadequate	6.5	< 7 hrs	100	Central obese	8	No Depression	8	Anxiety	10	No Stress	No	No	4.9	146	80	5.4	2	3.29	1.2	No	No	No	No	No	No	0	0
304	111.898	1_Johor	SMK BANDAR T6	49	Male	Malay	Degree	Married	No	No	Moderate	60	No Sedentary	<2	<3	Inadequate	4.5	< 7 hrs	96	Central obese	6	No Depression	8	Anxiety	2	No Stress	No	No	5	118	71	5.7	1.9	3.84	1	No	No	No	No	No	No	0	0
305	111.898	1_Johor	SMK BANDAR T6	39	Male	Malay	Diploma and below	Married	Yes	No	High	300	No Sedentary	<2	<3	Inadequate	7	7 hrs and above	103	Central obese	4	No Depression	6	No Anxiety	6	No Stress	No	No	8.5	134	87	5.3	1.6	3.17	1.4	No	Yes	No	No	No	No		1
306	111.898	1_Johor	SMK BANDAR T6	33	Male	Malay	Degree	Married	Yes	No	High	120	No Sedentary	<2	<3	Inadequate	7.5	7 hrs and above	89	No central obese	14	Depression	14	Anxiety	16	Stress	Yes	No	5.1	119	72	5.8	2.4	3.81	0.9	No	No	No	No	No	No	0	0
307	111.898	1_Johor	SMK BANDAR T6	28	Female	Malay	Degree	Married	No	No	Low	120	No Sedentary	<2	<3	Inadequate	7.5	7 hrs and above	66.5	No central obese	2	No Depression	2	No Anxiety	10	No Stress	No	No	4.61154	126	77	6.7	1	3.95	2.3	No	No	No	No	No	No	0	0
308	111.898	1_Johor	SMK BANDAR T6	47	Female	Malay	Degree	Married	No	Yes	Low	120	No Sedentary	<2	<3	Inadequate	8	7 hrs and above	90.5	Central obese	0	No Depression	2	No Anxiety	8	No Stress	No	No	13.5	149	89	6.6	2.2	4.3	1.3	Yes	No	Yes	No	No	No		1
309	111.898	1_Johor	SMK BANDAR T6	26	Male	Malay	Degree	Married	Yes	No	Moderate	100	No Sedentary	<2	<3	Inadequate	6	< 7 hrs	81	No central obese	0	No Depression	0	No Anxiety	0	No Stress	Yes	No	4.2	108	68	4.7	1	3.15	1.1	No	No	No	No	No	No	0	0
310	111.898	1_Johor	SMK BANDAR T6	39	Female	Malay	Degree	Married	No	No	Moderate	840	sedentary	<2	<3	Inadequate	5	< 7 hrs	70	No central obese	2	No Depression	4	No Anxiety	8	No Stress	No	No	4.4	128	76	5.2	0.6	3.73	1.2	No	No	No	No	No	No	0	0
311	181.169	1_Johor	SMK LKTP BELITONG	36	Female	Malay	Degree	Married	No	No	Low	148	No Sedentary	<2	<3	Inadequate	6.5	< 7 hrs	76	No central obese	2	No Depression	2	No Anxiety	2	No Stress	No	No	5.1	135	89	5.6	1.4	3.28	1.68	No	No	No	No	No	No	0	0
312	181.169	1_Johor	SMK LKTP BELITONG	37	Male	Malay	Degree	Married	Yes	No	Low	60	No Sedentary	<2	<3	Inadequate	5	< 7 hrs	93	Central obese	0	No Depression	8	Anxiety	12	No Stress	No	No	5.1	136	77	5.47115	3	3.47231	0.78	No	No	No	No	No	No	0	0
313	181.169	1_Johor	SMK LKTP BELITONG	46	Female	Malay	Diploma and below	Divorced/Widowed	No	No	Low	60	No Sedentary	<2	<3	Inadequate	6.5	< 7 hrs	83	Central obese	6	No Depression	4	No Anxiety	8	No Stress	No	No	5.1	130	87	5.1	0.9	3.25	1.44	No	No	No	No	No	No	0	0
314	181.169	1_Johor	SMK LKTP BELITONG	41	Female	Malay	Degree	Married	Yes	No	Moderate	60	No Sedentary	<2	<3	Inadequate	7	7 hrs and above	102	Central obese	0	No Depression	8	Anxiety	12	No Stress	No	No	5.8	140	80	4.9	1.6	2.84	1.33	No	Yes	No	No	No	No	1	0
315	181.169	1_Johor	SMK LKTP BELITONG	29	Female	Malay	Degree	Married	No	No	Moderate	120	No Sedentary	<2	<3	Inadequate	6.5	< 7 hrs	69	No central obese	6	No Depression	6	No Anxiety	8	No Stress	No	No	4.6	124	69	4.7	0.6	3.03	1.4	No	No	No	No	No	No	0	0
316	181.169	1_Johor	SMK LKTP BELITONG	42	Male	Malay	Degree	Married	No	No	Moderate	210	No Sedentary	<2	<3	Inadequate	4.5	< 7 hrs	102	Central obese	0	No Depression	4	No Anxiety	4	No Stress	No	No	6.1	147	102	5.2	1.4	3.57	0.99	No	Yes	No	No	No	No		1
317	181.169	1_Johor	SMK LKTP BELITONG	30	Female	Malay	Degree	Married	Yes	No	Moderate	240	No Sedentary	<2	<3	Inadequate	6.93077	< 7 hrs	87	Central obese	16	Depression	20	Anxiety	26	Stress	No	No	5.1	124	75	3.9	0.8	2.29	1.25	No	No	No	No	No	No	0	0
319	181.169	1_Johor	SMK LKTP BELITONG	50	Female	Malay	Degree	Divorced/Widowed	No	No	High	120	No Sedentary	<2	<3	Inadequate	5	< 7 hrs	68	No central obese	4	No Depression	20	Anxiety	10	No Stress	No	No	5.1	155	109	5.3	0.7	3.04	1.94	No	No	No	No	No	No	0	0
321	181.169	1_Johor	SMK LKTP BELITONG	43	Female	Malay	Degree	Married	Yes	No	Moderate	120	No Sedentary	<2	<3	Inadequate	5.5	< 7 hrs	83.5	Central obese	4	No Depression	6	No Anxiety	8	No Stress	No	No	5	154	100	6.2	1	4.52	1.23	No	No	No	No	No	No	0	0
322	181.169	1_Johor	SMK LKTP BELITONG	30	Male	Malay	Degree	Married	No	No	Low	90	No Sedentary	<2	<3	Inadequate	6	< 7 hrs	86	No central obese	0	No Depression	0	No Anxiety	0	No Stress	No	No	4.8	136	92	5.3	1.6	3.62	0.95	No	No	No	No	No	Yes	0	0
323	181.169	1_Johor	SMK LKTP BELITONG	46	Female	Malay	Degree	Married	No	No	High	300	No Sedentary	<2	<3	Inadequate	5.47644	< 7 hrs	81	Central obese	6	No Depression	10	Anxiety	10	No Stress	No	No	4.6	135	78	5.1	1.7	2.99	1.34	No	No	No	No	No	No	0	0
324	181.169	1_Johor	SMK LKTP BELITONG	41	Female	Malay	Degree	Married	No	No	Moderate	228	No Sedentary	>=2	>=3	Adequate	6	< 7 hrs	99	Central obese	6	No Depression	4	No Anxiety	7	No Stress	No	No	5.1	142	76	5.5	0.7	3.69	1.49	No	No	No	No	No	No	0	0
325	181.169	1_Johor	SMK LKTP BELITONG	33	Female	Malay	Degree	Married	Yes	No	High	60	No Sedentary	<2	<3	Inadequate	6.5	< 7 hrs	76	No central obese	0	No Depression	4	No Anxiety	8	No Stress	No	No	5.2	131	91	5.1	0.8	3.4	1.34	No	No	No	No	No	No	0	0
326	181.169	1_Johor	SMK LKTP BELITONG	30	Female	Malay	Degree	Married	No	No	High	480	No Sedentary	<2	<3	Inadequate	7.5	7 hrs and above	85	Central obese	4	No Depression	4	No Anxiety	4	No Stress	No	No	4.8	123	84	5.1	0.9	3.25	1.44	No	No	No	No	No	No	0	0
327	181.169	1_Johor	SMK LKTP BELITONG	26	Female	Malay	Degree	Single	Yes	No	High	480	No Sedentary	<2	<3	Inadequate	5	< 7 hrs	70	No central obese	4	No Depression	6	No Anxiety	6	No Stress	No	No	4.6	120	79	6	0.7	4.37	1.31	No	No	No	No	No	No	0	0
328	181.169	1_Johor	SMK LKTP BELITONG	49	Female	Malay	Degree	Married	No	No	Low	198	No Sedentary	<2	<3	Inadequate	6	< 7 hrs	83	Central obese	4	No Depression	10	Anxiety	4	No Stress	No	No	5	127	73	4.6	0.7	2.99	1.29	No	No	No	No	No	No	0	0
330	181.169	1_Johor	SMK LKTP BELITONG	48	Male	Malay	Degree	Married	No	No	Low	190	No Sedentary	<2	<3	Inadequate	6	< 7 hrs	86	No central obese	6	No Depression	10	Anxiety	6	No Stress	No	No	5.2	160	90	6.4	1	4.47	1.48	No	No	No	No	No	No	0	0
331	181.169	1_Johor	SMK LKTP BELITONG	54	Female	Malay	Diploma and below	Married	Yes	No	Moderate	215	No Sedentary	<2	<3	Inadequate	5	< 7 hrs	84	Central obese	10	Depression	18	Anxiety	20	Stress	No	No	6	122	67	4.9	1.3	3.31	1	No	Yes	No	No	No	No	1	0
332	64.167	1_Johor	SMK BUKIT GAMBIR	47	Female	Malay	Degree	Married	Yes	No	Moderate	217	No Sedentary	<2	<3	Inadequate	6.5	< 7 hrs	80	Central obese	20	Depression	8	Anxiety	24	Stress	No	No	5.8	127	70	4.3	0.8	2.7	1.21	No	Yes	No	No	No	No	1	0
333	64.167	1_Johor	SMK BUKIT GAMBIR	45	Female	Malay	Degree	Married	Yes	No	Low	120	No Sedentary	<2	<3	Inadequate	7.5	7 hrs and above	82	Central obese	16	Depression	20	Anxiety	24	Stress	No	No	5.4	129	75	5	0.8	3.09	1.55	No	No	No	No	No	No	0	0
334	64.167	1_Johor	SMK BUKIT GAMBIR	56	Male	Chinese	Degree	Married	Yes	No	High	120	No Sedentary	<2	<3	Inadequate	6	< 7 hrs	75.5	No central obese	6	No Depression	0	No Anxiety	8	No Stress	No	No	5.3	117	67	5.7	1	3.79	1.48	No	No	No	No	No	Yes	0	0
335	64.167	1_Johor	SMK BUKIT GAMBIR	37	Female	Malay	Degree	Married	No	No	Moderate	60	No Sedentary	<2	<3	Inadequate	6	< 7 hrs	71.3	No central obese	4	No Depression	12	Anxiety	8	No Stress	No	No	5.3	125	78	4.4	0.7	2.47	1.59	No	No	No	No	No	No	0	0
336	64.167	1_Johor	SMK BUKIT GAMBIR	53	Female	Malay	Degree	Married	No	No	High	240	No Sedentary	<2	<3	Inadequate	7	7 hrs and above	71	No central obese	8	No Depression	16	Anxiety	12	No Stress	No	No	5	122	71	5.4	0.8	3.73	1.36	No	No	No	No	No	Yes	0	0
337	64.167	1_Johor	SMK BUKIT GAMBIR	53	Female	Malay	Degree	Married	No	No	Low	194	No Sedentary	>=2	<3	Inadequate	6	< 7 hrs	80.4	Central obese	4	No Depression	8	Anxiety	2	No Stress	No	No	5.1	102	70	5.8	1.6	3.87	1.25	No	No	No	No	No	Yes	0	0
339	64.167	1_Johor	SMK BUKIT GAMBIR	29	Male	Malay	Degree	Married	Yes	No	Low	40	No Sedentary	<2	<3	Inadequate	5.5	< 7 hrs	90	Central obese	14	Depression	14	Anxiety	22	Stress	Yes	No	4.6	146	81	5.9	1.75192	3.73423	1.09	No	No	No	No	Yes	Yes	0	0
341	64.167	1_Johor	SMK BUKIT GAMBIR	44	Female	Chinese	Degree	Married	No	No	Low	420	No Sedentary	>=2	<3	Inadequate	7	7 hrs and above	76	No central obese	0	No Depression	2	No Anxiety	0	No Stress	No	No	4.5	134	69	5.8	1.5	3.07	2.07	No	No	No	No	No	Yes	0	0
343	64.167	1_Johor	SMK BUKIT GAMBIR	47	Female	Malay	Degree	Married	No	No	Low	168	No Sedentary	<2	<3	Inadequate	6	< 7 hrs	68	No central obese	4	No Depression	2	No Anxiety	2	No Stress	No	No	5.4	117	74	5.7	0.8	3.77	1.53	No	No	No	No	No	No	0	0
344	64.167	1_Johor	SMK BUKIT GAMBIR	45	Female	Chinese	Degree	Single	No	No	High	188	No Sedentary	<2	>=3	Inadequate	7.5	7 hrs and above	68	No central obese	2	No Depression	8	Anxiety	16	Stress	No	No	4.3	118	66	4.6	1.9	2.13	1.66	No	No	No	No	No	No	0	0
345	64.167	1_Johor	SMK BUKIT GAMBIR	30	Male	Malay	Degree	Married	No	No	High	175	No Sedentary	<2	<3	Inadequate	6.5	< 7 hrs	82	No central obese	6	No Depression	18	Anxiety	12	No Stress	No	No	5.2	122	76	5.5	1.1	3.61	1.42	No	No	No	No	No	No	0	0
346	64.167	1_Johor	SMK BUKIT GAMBIR	46	Female	Malay	Degree	Married	No	No	Moderate	120	No Sedentary	<2	<3	Inadequate	4.5	< 7 hrs	90	Central obese	6	No Depression	4	No Anxiety	14	Stress	No	No	4.3	118	67	4.8	1.8	2.85	1.08	No	No	No	No	No	No	0	0
347	64.167	1_Johor	SMK BUKIT GAMBIR	48	Female	Malay	Degree	Married	No	No	Moderate	480	No Sedentary	<2	<3	Inadequate	7.5	7 hrs and above	70	No central obese	2	No Depression	2	No Anxiety	2	No Stress	No	No	4.9	128	85	6.1	1.7	3.81	1.54	No	No	No	No	No	No	0	0
348	64.167	1_Johor	SMK BUKIT GAMBIR	30	Female	Malay	Degree	Married	Yes	No	Moderate	181	No Sedentary	<2	<3	Inadequate	8.25	7 hrs and above	78	No central obese	16	Depression	14	Anxiety	16	Stress	No	No	4.6	130	78	4.9	0.7	2.96	1.59	No	No	No	No	No	No	0	0
349	64.167	1_Johor	SMK BUKIT GAMBIR	55	Female	Malay	Diploma and below	Married	Yes	No	Low	90	No Sedentary	<2	>=3	Inadequate	7.5	7 hrs and above	109	Central obese	12	Depression	6	No Anxiety	4	No Stress	No	No	11.8	140	78	4.7	2.2	2.6	1.08	Yes	No	Yes	Yes	Yes	Yes		1
350	282.736	1_Johor	SMK TAMAN BUKIT INDAH	49	Female	Chinese	Master and above	Married	No	No	Low	300	No Sedentary	<2	<3	Inadequate	6	< 7 hrs	78.5	No central obese	24	Depression	30	Anxiety	30	Stress	No	No	6.1	132	82	5.3	0.7	3.68	1.3	No	No	Yes	No	No	Yes		1
351	282.736	1_Johor	SMK TAMAN BUKIT INDAH	47	Female	Chinese	Degree	Married	Yes	No	Moderate	300	No Sedentary	<2	<3	Inadequate	6.5	< 7 hrs	77	No central obese	14	Depression	12	Anxiety	16	Stress	No	No	5.5	120	73	4.8	1.3	3.01	1.2	No	No	No	No	No	No	0	0
352	282.736	1_Johor	SMK TAMAN BUKIT INDAH	34	Female	Malay	Degree	Married	Yes	No	Low	120	No Sedentary	<2	<3	Inadequate	6	< 7 hrs	74	No central obese	4	No Depression	10	Anxiety	6	No Stress	No	No	4.8	121	67	4.7	0.7	2.78	1.6	No	No	No	No	No	No	0	0
353	282.736	1_Johor	SMK TAMAN BUKIT INDAH	29	Female	Chinese	Degree	Married	Yes	No	Low	360	No Sedentary	<2	<3	Inadequate	8.5	7 hrs and above	74	No central obese	8	No Depression	6	No Anxiety	14	Stress	No	No	5	124	72	5	1.6	3.17	1.1	No	No	No	No	No	Yes	0	0
354	282.736	1_Johor	SMK TAMAN BUKIT INDAH	33	Female	Malay	Degree	Married	Yes	No	Low	211	No Sedentary	<2	<3	Inadequate	5.5	< 7 hrs	88	Central obese	6	No Depression	10	Anxiety	14	Stress	No	No	5.2	120	68	5.1	1.7	2.93	1.4	No	No	No	No	No	No	0	0
355	282.736	1_Johor	SMK TAMAN BUKIT INDAH	53	Female	Chinese	Master and above	Married	Yes	No	Moderate	240	No Sedentary	<2	<3	Inadequate	5.5	< 7 hrs	78.5	No central obese	4	No Depression	8	Anxiety	16	Stress	No	No	7.3	142	75	6.8	1.2	4.66	1.6	Yes	No	Yes	Yes	No	No		1
356	282.736	1_Johor	SMK TAMAN BUKIT INDAH	32	Female	Malay	Diploma and below	Married	No	No	Low	167	No Sedentary	<2	<3	Inadequate	7.5	7 hrs and above	72.5	No central obese	6	No Depression	10	Anxiety	14	Stress	No	No	4.7	142	89	4.9	1.8	2.28	1.8	No	No	No	No	No	No	0	0
357	282.736	1_Johor	SMK TAMAN BUKIT INDAH	32	Female	Malay	Degree	Married	No	No	Low	162	No Sedentary	<2	<3	Inadequate	5.5	< 7 hrs	82	Central obese	0	No Depression	0	No Anxiety	0	No Stress	No	No	4.9	115	74	3.7	0.7	1.78	1.6	No	No	No	No	No	No	0	0
359	282.736	1_Johor	SMK TAMAN BUKIT INDAH	37	Female	Indian	Degree	Married	Yes	No	Moderate	172	No Sedentary	<2	<3	Inadequate	7	7 hrs and above	69	No central obese	8	No Depression	8	Anxiety	18	Stress	No	No	4.9	117	79	5.2	1	2.95	1.8	No	No	No	No	No	No	0	0
360	282.736	1_Johor	SMK TAMAN BUKIT INDAH	36	Female	Chinese	Degree	Married	Yes	Yes	Low	90	No Sedentary	<2	>=3	Inadequate	6.5	< 7 hrs	87	Central obese	14	Depression	12	Anxiety	14	Stress	No	No	5.6	128	83	4.9	1.2	3.26	1.1	No	Yes	No	No	No	No	1	0
361	282.736	1_Johor	SMK TAMAN BUKIT INDAH	32	Female	Malay	Degree	Single	No	No	Low	189	No Sedentary	<2	<3	Inadequate	6	< 7 hrs	69	No central obese	4	No Depression	10	Anxiety	12	No Stress	No	No	4.6	100	68.6538	6	0.9	4.19	1.4	No	No	No	No	No	Yes	0	0
362	282.736	1_Johor	SMK TAMAN BUKIT INDAH	41	Female	Indian	Master and above	Married	Yes	No	Low	600	sedentary	>=2	>=3	Adequate	5.5	< 7 hrs	77	No central obese	6	No Depression	10	Anxiety	13	No Stress	No	No	7.4	129	80	5.1	2.3	2.56	1.5	No	Yes	No	No	No	No		1
363	282.736	1_Johor	SMK TAMAN BUKIT INDAH	36	Female	Malay	Degree	Married	Yes	No	Low	188	No Sedentary	<2	<3	Inadequate	7.5	7 hrs and above	84	Central obese	8	No Depression	6	No Anxiety	10	No Stress	No	No	5.8	120	72	5.5	2.7	3.27	1	No	Yes	No	No	No	No	1	0
365	282.736	1_Johor	SMK TAMAN BUKIT INDAH	31	Female	Malay	Diploma and below	Single	Yes	No	Low	240	No Sedentary	>=2	<3	Inadequate	8	7 hrs and above	81	Central obese	0	No Depression	6	No Anxiety	6	No Stress	No	No	5.3	141	81	5.9	1.4	3.86	1.4	No	No	No	No	No	No	0	0
366	282.736	1_Johor	SMK TAMAN BUKIT INDAH	48	Female	Malay	Degree	Married	Yes	No	Low	189	No Sedentary	<2	<3	Inadequate	5	< 7 hrs	79	No central obese	2	No Depression	10	Anxiety	8	No Stress	No	No	7.2	105	74	5.1	2.3	2.86	1.2	Yes	No	Yes	No	No	No		1
367	282.736	1_Johor	SMK TAMAN BUKIT INDAH	43	Female	Malay	Degree	Married	No	No	Moderate	165	No Sedentary	<2	<3	Inadequate	5.5	< 7 hrs	73.5	No central obese	0	No Depression	2	No Anxiety	2	No Stress	No	No	4.9	128	65	4.8	0.6	2.63	1.9	No	No	No	No	No	No	0	0
368	282.736	1_Johor	SMK TAMAN BUKIT INDAH	46	Female	Malay	Degree	Married	No	No	High	240	No Sedentary	>=2	<3	Inadequate	5.5	< 7 hrs	84	Central obese	2	No Depression	6	No Anxiety	4	No Stress	No	No	5.1	148	86	5.2	1.3	3.31	1.3	No	No	No	No	Yes	Yes	0	0
370	282.736	1_Johor	SMK TAMAN BUKIT INDAH	37	Female	Malay	Master and above	Single	Yes	No	Moderate	840	sedentary	<2	<3	Inadequate	6.5	< 7 hrs	76	No central obese	4	No Depression	8	Anxiety	6	No Stress	No	No	4.9	110	70	5.8	1.6	3.77	1.3	No	No	No	No	No	No	0	0
371	282.736	1_Johor	SMK TAMAN BUKIT INDAH	35	Female	Chinese	Degree	Married	Yes	No	Low	217	No Sedentary	<2	<3	Inadequate	6.5	< 7 hrs	68	No central obese	22	Depression	20	Anxiety	26	Stress	No	No	4.8	103	68	5	0.8	3.24	1.4	No	No	No	No	No	No	0	0
372	282.736	1_Johor	SMK TAMAN BUKIT INDAH	39	Male	Malay	Degree	Married	Yes	No	High	120	No Sedentary	<2	<3	Inadequate	6.5	< 7 hrs	113	Central obese	0	No Depression	4	No Anxiety	8	No Stress	No	No	5.5	135	88	4.8	2	2.79	1.1	No	No	No	No	No	No	0	0
373	282.736	1_Johor	SMK TAMAN BUKIT INDAH	32	Female	Malay	Degree	Married	Yes	No	Moderate	140	No Sedentary	<2	<3	Inadequate	8	7 hrs and above	104	Central obese	2	No Depression	8	Anxiety	10	No Stress	No	No	5.1	131	82	5.3	1.3	3.41	1.3	No	No	No	No	No	No	0	0
375	190.179	1_Johor	SMK BANANG JAYA	37	Female	Malay	Degree	Married	No	No	Moderate	120	No Sedentary	>=2	<3	Inadequate	8	7 hrs and above	82.5	Central obese	0	No Depression	0	No Anxiety	2	No Stress	No	No	5.5	145	78	4.6	0.7	3.08	1.2	No	No	No	No	No	No	0	0
376	190.179	1_Johor	SMK BANANG JAYA	39	Female	Malay	Degree	Married	No	No	Low	181	No Sedentary	<2	<3	Inadequate	6.5	< 7 hrs	81	Central obese	6	No Depression	4	No Anxiety	4	No Stress	No	No	4.3	122	74	4.9	0.9	2.89	1.6	No	No	No	No	No	No	0	0
377	190.179	1_Johor	SMK BANANG JAYA	43	Female	Malay	Degree	Married	Yes	No	Low	190	No Sedentary	<2	<3	Inadequate	5.5	< 7 hrs	87.5	Central obese	6	No Depression	16	Anxiety	18	Stress	No	No	4.7	124	76	5.6	1.6	3.57	1.3	No	No	No	No	No	No	0	0
378	190.179	1_Johor	SMK BANANG JAYA	46	Female	Chinese	Degree	Married	No	No	Low	206	No Sedentary	<2	<3	Inadequate	7.5	7 hrs and above	70	No central obese	6	No Depression	4	No Anxiety	10	No Stress	No	No	4.9	115	74	4.9	1.4	2.76	1.5	No	No	No	No	No	No	0	0
379	190.179	1_Johor	SMK BANANG JAYA	58	Male	Malay	Master and above	Married	Yes	No	Moderate	90	No Sedentary	<2	<3	Inadequate	5.5	< 7 hrs	87	No central obese	2	No Depression	2	No Anxiety	4	No Stress	No	No	11.8	118	64	3.7	2.6	2.73615	1	Yes	No	Yes	Yes	No	Yes		1
380	190.179	1_Johor	SMK BANANG JAYA	37	Male	Malay	Degree	Married	No	No	High	148	No Sedentary	<2	<3	Inadequate	5.5	< 7 hrs	86.4	No central obese	4	No Depression	6	No Anxiety	2	No Stress	No	No	4.6	131	82	5.9	1.58846	3.06	1.2	No	No	No	No	No	No	0	0
381	190.179	1_Johor	SMK BANANG JAYA	38	Female	Malay	Degree	Married	No	Yes	High	90	No Sedentary	<2	<3	Inadequate	6	< 7 hrs	79.2	No central obese	0	No Depression	0	No Anxiety	2	No Stress	No	No	4.6	143	91	5.2	1.1	3.4	1.3	No	No	No	No	No	No	0	0
382	190.179	1_Johor	SMK BANANG JAYA	35	Female	Chinese	Degree	Married	No	No	High	120	No Sedentary	>=2	<3	Inadequate	7.5	7 hrs and above	70	No central obese	0	No Depression	0	No Anxiety	0	No Stress	No	No	4.6	105	63	4.8	1.3	2.81	1.4	No	No	No	No	No	No	0	0
383	190.179	1_Johor	SMK BANANG JAYA	31	Female	Malay	Degree	Married	No	No	Moderate	60	No Sedentary	<2	<3	Inadequate	5.5	< 7 hrs	63	No central obese	4	No Depression	10	Anxiety	12	No Stress	No	No	4.8	95	65.3462	3.7	0.9	2.09	1.2	No	No	No	No	No	No	0	0
384	190.179	1_Johor	SMK BANANG JAYA	34	Female	Malay	Degree	Married	Yes	No	Low	120	No Sedentary	<2	<3	Inadequate	6.5	< 7 hrs	79	No central obese	12	Depression	24	Anxiety	26	Stress	No	No	6.7	125	83	5.6	2.8	3.13	1.2	No	Yes	No	No	No	No		1
385	190.179	1_Johor	SMK BANANG JAYA	41	Female	Malay	Degree	Married	No	Yes	Low	360	No Sedentary	>=2	>=3	Adequate	6.5	< 7 hrs	105	Central obese	10	Depression	16	Anxiety	18	Stress	No	No	4.7	130	98	5	2.4	2.81	1.1	No	No	No	No	No	Yes	0	0
386	190.179	1_Johor	SMK BANANG JAYA	41	Female	Chinese	Degree	Single	No	No	High	450	No Sedentary	<2	<3	Inadequate	7	7 hrs and above	65	No central obese	4	No Depression	0	No Anxiety	2	No Stress	No	No	4.3	114	70	4.8	0.8	2.84	1.6	No	No	No	No	No	No	0	0
387	190.179	1_Johor	SMK BANANG JAYA	47	Male	Malay	Master and above	Married	Yes	No	Low	180	No Sedentary	<2	<3	Inadequate	6	< 7 hrs	103	Central obese	4	No Depression	4	No Anxiety	8	No Stress	Yes	No	5.4	127	78	4.1	1.1	2.5	1.1	No	No	No	No	Yes	Yes	0	0
388	190.179	1_Johor	SMK BANANG JAYA	47	Female	Chinese	Degree	Single	Yes	No	Low	202	No Sedentary	<2	<3	Inadequate	8	7 hrs and above	67	No central obese	2	No Depression	4	No Anxiety	2	No Stress	No	No	5	145	88	6.3	0.8	3.94	2	No	No	No	No	No	No	0	0
389	190.179	1_Johor	SMK BANANG JAYA	40	Female	Malay	Degree	Married	Yes	No	Low	240	No Sedentary	<2	>=3	Inadequate	5	< 7 hrs	67	No central obese	4	No Depression	8	Anxiety	6	No Stress	No	No	4.8	131	69	5	0.6	2.93	1.8	No	No	No	No	No	No	0	0
390	190.179	1_Johor	SMK BANANG JAYA	48	Male	Malay	Degree	Married	Yes	No	Low	240	No Sedentary	<2	<3	Inadequate	6.5	< 7 hrs	95	Central obese	6	No Depression	8	Anxiety	8	No Stress	Yes	No	5.7	151	95	6.1	2.8	3.63	1.2	No	Yes	No	No	Yes	Yes	1	0
391	190.179	1_Johor	SMK BANANG JAYA	33	Male	Malay	Degree	Married	No	No	Moderate	300	No Sedentary	<2	<3	Inadequate	4.5	< 7 hrs	87	No central obese	0	No Depression	6	No Anxiety	4	No Stress	No	No	4.6	128	72	4.7	1.4	2.66	1.4	No	No	No	No	No	No	0	0
392	190.179	1_Johor	SMK BANANG JAYA	32	Female	Malay	Degree	Married	Yes	No	Moderate	360	No Sedentary	<2	<3	Inadequate	6.5	< 7 hrs	88.5	Central obese	6	No Depression	6	No Anxiety	14	Stress	No	No	4.1	133	82	4.7	0.7	3.28	1.1	No	No	No	No	No	No	0	0
393	190.179	1_Johor	SMK BANANG JAYA	46	Female	Malay	Degree	Married	Yes	No	Low	300	No Sedentary	<2	<3	Inadequate	6.5	< 7 hrs	69.5	No central obese	10	Depression	8	Anxiety	14	Stress	No	No	4.8	110	62	6.5	0.8	3.94	2.2	No	No	No	No	No	No	0	0
394	190.179	1_Johor	SMK BANANG JAYA	32	Male	Malay	Degree	Single	No	No	Moderate	120	No Sedentary	<2	>=3	Inadequate	7	7 hrs and above	77	No central obese	10	Depression	6	No Anxiety	14	Stress	No	No	4.9	115	66	5.4	0.6	3.53	1.6	No	No	No	No	No	No	0	0
395	190.179	1_Johor	SMK BANANG JAYA	51	Male	Malay	Degree	Married	Yes	No	High	300	No Sedentary	<2	<3	Inadequate	5.5	< 7 hrs	87	No central obese	12	Depression	18	Anxiety	12	No Stress	No	No	5.6	139	81	5.7	1.75577	3.29	1	No	Yes	No	No	No	Yes	1	0
396	190.179	1_Johor	SMK BANANG JAYA	29	Female	Malay	Degree	Married	Yes	No	High	60	No Sedentary	<2	<3	Inadequate	6	< 7 hrs	83.5	Central obese	0	No Depression	4	No Anxiety	0	No Stress	No	No	4.9	116	76	5.00577	1.6	1.67	1	No	No	No	No	No	No	0	0
399	189.444	1_Johor	SMK BULUH KASAP	36	Female	Malay	Degree	Married	No	No	Moderate	163	No Sedentary	<2	<3	Inadequate	6	< 7 hrs	76.5	No central obese	12	Depression	16	Anxiety	12	No Stress	No	No	4.8	117	60	5.1	0.5	3.57	1.3	No	No	No	No	No	No	0	0
400	189.444	1_Johor	SMK BULUH KASAP	43	Male	Malay	Degree	Married	Yes	No	Low	170	No Sedentary	<2	<3	Inadequate	5	< 7 hrs	92	Central obese	0	No Depression	4	No Anxiety	2	No Stress	No	No	4.8	155	86	5.2	2.5	3.06	1	No	No	No	No	No	No	0	0
402	189.444	1_Johor	SMK BULUH KASAP	44	Male	Malay	Degree	Married	No	No	Moderate	60	No Sedentary	<2	<3	Inadequate	5.5	< 7 hrs	108.5	Central obese	4	No Depression	0	No Anxiety	2	No Stress	No	No	6.4	143.519	95	5.7	1	4.05	1.2	No	Yes	No	No	No	No		1
403	189.444	1_Johor	SMK BULUH KASAP	34	Female	Indian	Degree	Married	Yes	No	Moderate	173	No Sedentary	<2	<3	Inadequate	6.5	< 7 hrs	83	Central obese	0	No Depression	2	No Anxiety	12	No Stress	No	No	4.7	120	66	4.1	0.9	2.49	1.2	No	No	No	No	No	No	0	0
404	189.444	1_Johor	SMK BULUH KASAP	43	Female	Malay	Degree	Married	No	No	Moderate	30	No Sedentary	<2	<3	Inadequate	5.05288	< 7 hrs	80.5	Central obese	12	Depression	10	Anxiety	20	Stress	No	No	4.2	157	62	4.7	1.5	2.82	1.2	No	No	No	No	No	No	0	0
405	189.444	1_Johor	SMK BULUH KASAP	27	Female	Malay	Degree	Married	No	No	Low	40	No Sedentary	<2	<3	Inadequate	7.5	7 hrs and above	97	Central obese	4	No Depression	12	Anxiety	10	No Stress	No	No	4.5	132	76	4.7	1.4	2.86	1.2	No	No	No	No	No	No	0	0
406	189.444	1_Johor	SMK BULUH KASAP	44	Female	Malay	Degree	Married	No	No	Moderate	180	No Sedentary	<2	<3	Inadequate	6	< 7 hrs	79	No central obese	10	Depression	14	Anxiety	16	Stress	No	No	4.8	126	70	5.7	1.9	3.54	1.3	No	No	No	No	No	No	0	0
407	189.444	1_Johor	SMK BULUH KASAP	35	Female	Malay	Degree	Married	Yes	No	Moderate	143	No Sedentary	<2	<3	Inadequate	6	< 7 hrs	74	No central obese	10	Depression	6	No Anxiety	10	No Stress	No	No	4.4	120	75	5.2	0.9	3.39	1.4	No	No	No	No	No	No	0	0
408	189.444	1_Johor	SMK BULUH KASAP	40	Female	Malay	Master and above	Married	Yes	Yes	Moderate	120	No Sedentary	<2	<3	Inadequate	7.02788	7 hrs and above	80.5	Central obese	2	No Depression	8	Anxiety	6	No Stress	No	No	4.8	110	71	5.9	1.1	3.6	1.8	No	No	No	No	No	No	0	0
409	51.091	1_Johor	SMK BANDAR MAS	29	Female	Malay	Degree	Single	Yes	No	Low	30	No Sedentary	<2	<3	Inadequate	7	7 hrs and above	77	No central obese	4	No Depression	12	Anxiety	6	No Stress	No	No	4.8	136	78	6.2	0.7	4.18	1.66	No	No	No	No	No	No	0	0
410	51.091	1_Johor	SMK BANDAR MAS	34	Female	Malay	Degree	Married	Yes	No	Low	156	No Sedentary	<2	<3	Inadequate	6	< 7 hrs	84	Central obese	12	Depression	14	Anxiety	14	Stress	No	No	5.3	118	79	4.3	1.3	2.55	1.11	No	No	No	No	No	No	0	0
411	51.091	1_Johor	SMK BANDAR MAS	52	Male	Malay	Degree	Married	Yes	No	High	228	No Sedentary	<2	<3	Inadequate	7.55433	7 hrs and above	84.5	No central obese	0	No Depression	2	No Anxiety	0	No Stress	No	No	5.4	134	86	7.1	1	5.01	1.62	No	No	No	No	Yes	No	0	0
413	51.091	1_Johor	SMK BANDAR MAS	46	Male	Malay	Degree	Married	No	No	Low	120	No Sedentary	<2	<3	Inadequate	6.5	< 7 hrs	80	No central obese	14	Depression	16	Anxiety	16	Stress	No	No	4.8	109	68	6.8	1.4	4.78	1.32	No	No	No	No	No	No	0	0
415	51.091	1_Johor	SMK BANDAR MAS	43	Male	Malay	Degree	Married	Yes	No	Low	60	No Sedentary	<2	<3	Inadequate	5.5	< 7 hrs	89.5	No central obese	8	No Depression	8	Anxiety	2	No Stress	No	No	4.9	142	98	5.2	1	3.74	1.01	No	No	No	No	No	No	0	0
416	51.091	1_Johor	SMK BANDAR MAS	44	Female	Malay	Degree	Married	Yes	No	High	120	No Sedentary	<2	<3	Inadequate	7.5	7 hrs and above	65	No central obese	2	No Depression	3	No Anxiety	4	No Stress	No	No	4.8	108	69.2692	5	0.6	3.01	1.67	No	No	No	No	No	No	0	0
417	51.091	1_Johor	SMK BANDAR MAS	46	Female	Malay	Degree	Married	No	No	Low	171	No Sedentary	<2	<3	Inadequate	7	7 hrs and above	74	No central obese	0	No Depression	2	No Anxiety	2	No Stress	No	No	5.2	111	67	4.8	0.9	2.61	1.8	No	No	No	No	No	No	0	0
418	51.091	1_Johor	SMK BANDAR MAS	32	Female	Malay	Degree	Married	No	No	Low	151	No Sedentary	<2	<3	Inadequate	6.5	< 7 hrs	67	No central obese	0	No Depression	0	No Anxiety	0	No Stress	No	No	4.6	106	59	4.3	0.5	1.95	2.12	No	No	No	No	No	No	0	0
419	51.091	1_Johor	SMK BANDAR MAS	36	Female	Malay	Degree	Married	Yes	Yes	Low	175	No Sedentary	<2	<3	Inadequate	6	< 7 hrs	82	Central obese	0	No Depression	0	No Anxiety	8	No Stress	No	No	7.5	120	75	6.5	2.5	4.07	1.33	No	Yes	No	No	No	No		1
420	51.091	1_Johor	SMK BANDAR MAS	27	Female	Malay	Degree	Married	No	No	Low	186	No Sedentary	<2	<3	Inadequate	5.5	< 7 hrs	83	Central obese	4	No Depression	6	No Anxiety	12	No Stress	No	No	4.7	115	78	6.2	1.6	4.1	1.35	No	No	No	No	No	No	0	0
421	51.091	1_Johor	SMK BANDAR MAS	45	Female	Malay	Degree	Married	No	Yes	High	120	No Sedentary	<2	<3	Inadequate	5.5	< 7 hrs	77	No central obese	0	No Depression	18	Anxiety	8	No Stress	No	No	5.1	128	76	6.2	0.9	4.05	1.72	No	No	No	No	No	No	0	0
422	51.091	1_Johor	SMK BANDAR MAS	43	Female	Malay	Degree	Married	No	No	High	360	No Sedentary	<2	<3	Inadequate	7	7 hrs and above	75	No central obese	0	No Depression	6	No Anxiety	24	Stress	No	No	4.8	99	68.7885	4.1	1.3	2.48	0.99	No	No	No	No	No	No	0	0
423	51.091	1_Johor	SMK BANDAR MAS	45	Female	Malay	Degree	Married	Yes	No	Low	174	No Sedentary	<2	<3	Inadequate	5.5	< 7 hrs	71	No central obese	10	Depression	6	No Anxiety	12	No Stress	No	No	5.4	121	72	6.2	1.3	3.86	1.78	No	No	No	No	No	No	0	0
424	51.091	1_Johor	SMK BANDAR MAS	33	Male	Malay	Degree	Married	Yes	No	Low	188	No Sedentary	<2	<3	Inadequate	6	< 7 hrs	100	Central obese	4	No Depression	10	Anxiety	2	No Stress	No	No	14.9	134	80	5.8	2.6	3.25	1.33	No	Yes	No	No	No	No		1
425	51.091	1_Johor	SMK BANDAR MAS	28	Female	Indian	Degree	Single	Yes	No	Low	197	No Sedentary	<2	<3	Inadequate	6	< 7 hrs	86	Central obese	0	No Depression	4	No Anxiety	4	No Stress	No	No	5.2	116	68	4.59231	0.5	2.09	1.06	No	No	No	No	No	No	0	0
426	51.091	1_Johor	SMK BANDAR MAS	45	Female	Malay	Degree	Married	Yes	Yes	Moderate	60	No Sedentary	<2	<3	Inadequate	6	< 7 hrs	71	No central obese	0	No Depression	4	No Anxiety	2	No Stress	No	No	6.4	115	74	6.2	0.8	4.41	1.46	No	Yes	No	No	No	No		1
427	51.091	1_Johor	SMK BANDAR MAS	32	Female	Malay	Degree	Married	No	No	Low	174	No Sedentary	<2	<3	Inadequate	5	< 7 hrs	76	No central obese	0	No Depression	2	No Anxiety	0	No Stress	No	No	5	106	69	3.9	0.9	2.3	1.18	No	No	No	No	No	No	0	0
428	51.091	1_Johor	SMK BANDAR MAS	54	Male	Malay	Diploma and below	Single	No	No	Low	30	No Sedentary	<2	<3	Inadequate	5.5	< 7 hrs	78	No central obese	0	No Depression	2	No Anxiety	4	No Stress	No	No	5.2	128	76	4.6	0.8	2.6	1.58	No	No	No	No	No	No	0	0
429	51.091	1_Johor	SMK BANDAR MAS	31	Female	Malay	Degree	Single	No	No	Low	30	No Sedentary	<2	<3	Inadequate	7	7 hrs and above	100	Central obese	8	No Depression	6	No Anxiety	4	No Stress	No	No	5.2	128	62	6.4	1.5	4.67	1.07	No	No	No	No	No	No	0	0
430	51.091	1_Johor	SMK BANDAR MAS	40	Male	Malay	Degree	Married	Yes	No	High	180	No Sedentary	<2	<3	Inadequate	5.5	< 7 hrs	81	No central obese	6	No Depression	4	No Anxiety	12	No Stress	No	No	4.6	110	75	7.7	2	4.8	1.95	No	No	No	No	No	No	0	0
431	51.091	1_Johor	SMK BANDAR MAS	36	Female	Malay	Degree	Married	Yes	No	Low	150	No Sedentary	<2	<3	Inadequate	5.5	< 7 hrs	71	No central obese	0	No Depression	0	No Anxiety	2	No Stress	No	No	4.3	105	66	3.8	0.5	1.94	1.6	No	No	No	No	No	No	0	0
432	51.091	1_Johor	SMK BANDAR MAS	53	Female	Malay	Diploma and below	Married	No	No	Low	229	No Sedentary	<2	<3	Inadequate	6	< 7 hrs	79	No central obese	2	No Depression	8	Anxiety	10	No Stress	No	No	5.1	174	104	6.2	1.3	4.32	1.29	No	No	No	No	No	No	0	0
433	51.091	1_Johor	SMK BANDAR MAS	46	Male	Malay	Degree	Married	No	No	Moderate	120	No Sedentary	<2	<3	Inadequate	6	< 7 hrs	93	Central obese	6	No Depression	2	No Anxiety	2	No Stress	No	No	5.5	122	76	5.6	1.8	3.79	1.04	No	No	No	No	No	No	0	0
434	51.091	1_Johor	SMK BANDAR MAS	30	Female	Malay	Degree	Married	No	No	Low	150	No Sedentary	<2	<3	Inadequate	6.5	< 7 hrs	66	No central obese	0	No Depression	2	No Anxiety	2	No Stress	No	No	4.6	109	71	3.8	0.5	2.37	1.21	No	No	No	No	No	No	0	0
435	51.091	1_Johor	SMK BANDAR MAS	32	Female	Malay	Degree	Married	No	No	Low	165	No Sedentary	<2	<3	Inadequate	6	< 7 hrs	71	No central obese	14	Depression	8	Anxiety	16	Stress	No	No	4.9	99	59	5	0.7	3.06	1.64	No	No	No	No	No	No	0	0
436	51.091	1_Johor	SMK BANDAR MAS	33	Female	Malay	Degree	Married	No	No	Low	480	No Sedentary	<2	<3	Inadequate	7.5	7 hrs and above	83.5	Central obese	0	No Depression	6	No Anxiety	4	No Stress	No	No	4.8	123	74	5	2	3.07	1.02	No	No	No	No	No	No	0	0
437	51.091	1_Johor	SMK BANDAR MAS	47	Female	Malay	Degree	Married	No	No	Moderate	206	No Sedentary	<2	<3	Inadequate	8.5	7 hrs and above	73	No central obese	0	No Depression	0	No Anxiety	0	No Stress	No	No	4.4	151	94	5.4	1.9	2.91	1.64	No	No	No	No	No	No	0	0
438	51.091	1_Johor	SMK BANDAR MAS	37	Male	Malay	Master and above	Married	No	No	High	240	No Sedentary	<2	<3	Inadequate	4.5	< 7 hrs	114	Central obese	2	No Depression	6	No Anxiety	6	No Stress	No	No	6.6	149	94	6.8	1.51538	3.85	1.4	No	Yes	No	No	Yes	Yes		1
439	51.091	1_Johor	SMK BANDAR MAS	52	Female	Malay	Degree	Married	Yes	No	Low	240	No Sedentary	<2	>=3	Inadequate	4.5	< 7 hrs	113	Central obese	8	No Depression	2	No Anxiety	6	No Stress	No	No	11.7	143	89	4.9	1.2	2.94	1.43	Yes	No	Yes	Yes	No	No		1
440	170.909	1_Johor	SMK BUKIT NANING	40	Female	Malay	Degree	Married	Yes	No	Moderate	138	No Sedentary	<2	<3	Inadequate	5.5	< 7 hrs	86.1	Central obese	2	No Depression	4	No Anxiety	4	No Stress	No	No	5.6	122	85	4.3	0.7	2.78	1.2	No	Yes	No	No	No	No	1	0
441	170.909	1_Johor	SMK BUKIT NANING	29	Male	Malay	Degree	Married	No	No	Moderate	360	No Sedentary	<2	<3	Inadequate	6	< 7 hrs	83	No central obese	0	No Depression	2	No Anxiety	0	No Stress	Yes	No	4.8	129	79	4.5	0.6	3.13	1.1	No	No	No	No	No	No	0	0
443	170.909	1_Johor	SMK BUKIT NANING	29	Male	Malay	Degree	Married	Yes	No	Moderate	240	No Sedentary	<2	<3	Inadequate	5.5	< 7 hrs	75.5	No central obese	4	No Depression	18	Anxiety	14	Stress	No	No	5.1	124	65	4.2	0.5	2.57	1.4	No	No	No	No	No	No	0	0
444	170.909	1_Johor	SMK BUKIT NANING	46	Female	Malay	Degree	Divorced/Widowed	No	No	Moderate	240	No Sedentary	<2	<3	Inadequate	6.5	< 7 hrs	69	No central obese	1	No Depression	2	No Anxiety	3	No Stress	No	No	4.5	107	64	5	0.4	2.82	2	No	No	No	No	No	No	0	0
445	170.909	1_Johor	SMK BUKIT NANING	35	Female	Malay	Degree	Married	No	No	High	161	No Sedentary	<2	<3	Inadequate	5	< 7 hrs	84	Central obese	4	No Depression	10	Anxiety	12	No Stress	No	No	4.8	125	82	5.3	0.6	3.3	2	No	No	No	No	No	No	0	0
446	170.909	1_Johor	SMK BUKIT NANING	46	Male	Malay	Degree	Married	No	No	Moderate	176	No Sedentary	<2	<3	Inadequate	5	< 7 hrs	89.1	No central obese	0	No Depression	0	No Anxiety	0	No Stress	No	No	4.5	132	85	6.6	1.3	4.51	1.5	No	No	No	No	No	No	0	0
447	170.909	1_Johor	SMK BUKIT NANING	47	Female	Malay	Degree	Married	Yes	No	Low	420	No Sedentary	<2	<3	Inadequate	8	7 hrs and above	68	No central obese	4	No Depression	6	No Anxiety	10	No Stress	No	No	4.6	145	81	4.6	1	2.45	1.7	No	No	No	No	No	No	0	0
448	170.909	1_Johor	SMK BUKIT NANING	49	Female	Malay	Degree	Married	Yes	No	Low	229	No Sedentary	<2	<3	Inadequate	5.5	< 7 hrs	69	No central obese	2	No Depression	5	No Anxiety	6	No Stress	No	No	5.2	108	70	8	0.8	5.34	2.3	No	No	No	No	No	Yes	0	0
449	170.909	1_Johor	SMK BUKIT NANING	44	Female	Malay	Degree	Married	No	No	Moderate	129	No Sedentary	<2	<3	Inadequate	7.5	7 hrs and above	86.5	Central obese	6	No Depression	8	Anxiety	8	No Stress	No	No	5.5	113	72.1538	3.6	0.7	1.98	1.3	No	No	No	No	No	No	0	0
451	170.909	1_Johor	SMK BUKIT NANING	30	Female	Malay	Degree	Married	No	No	Low	60	No Sedentary	<2	<3	Inadequate	6	< 7 hrs	67	No central obese	2	No Depression	4	No Anxiety	4	No Stress	No	No	4.8	111	79	4.4	0.9	2.59	1.4	No	No	No	No	No	No	0	0
452	170.909	1_Johor	SMK BUKIT NANING	47	Male	Malay	Degree	Married	Yes	No	Low	243	No Sedentary	<2	<3	Inadequate	5.5	< 7 hrs	98.2	Central obese	0	No Depression	0	No Anxiety	0	No Stress	No	No	14.5	166	95	5	1.4	3.26	1.1	Yes	No	Yes	Yes	Yes	No		1
453	170.909	1_Johor	SMK BUKIT NANING	40	Female	Malay	Degree	Married	No	No	Moderate	180	No Sedentary	>=2	<3	Inadequate	6.5	< 7 hrs	77.8	No central obese	14	Depression	14	Anxiety	14	Stress	No	No	4.6	149	103	6.6	1.6	4.07	1.8	No	No	No	No	No	No	0	0
454	170.909	1_Johor	SMK BUKIT NANING	44	Female	Malay	Degree	Married	No	No	Low	180	No Sedentary	<2	<3	Inadequate	6	< 7 hrs	77.5	No central obese	8	No Depression	6	No Anxiety	8	No Stress	No	No	5.3	147	74	4.8	0.6	2.73	1.8	No	No	No	No	No	No	0	0
455	170.909	1_Johor	SMK BUKIT NANING	54	Female	Malay	Degree	Married	Yes	No	Moderate	420	No Sedentary	>=2	>=3	Adequate	5.5	< 7 hrs	99.2	Central obese	4	No Depression	8	Anxiety	6	No Stress	No	No	5.1	167	69	6.1	1.8	3.98	1.3	No	No	No	No	Yes	Yes	0	0
456	508.308	1_Johor	SMK BANDAR SERI ALAM	52	Female	Malay	Degree	Married	Yes	No	High	90	No Sedentary	<2	<3	Inadequate	5	< 7 hrs	76	No central obese	6	No Depression	4	No Anxiety	10	No Stress	No	No	6	152	88	5.7	1.1	3.7	1.5	No	Yes	No	No	No	No	1	0
457	508.308	1_Johor	SMK BANDAR SERI ALAM	52	Male	Malay	Degree	Married	No	No	Low	120	No Sedentary	<2	<3	Inadequate	5	< 7 hrs	80	No central obese	0	No Depression	4	No Anxiety	6	No Stress	No	No	5.1	150	83	5.8	1.48654	3.14	1.21	No	No	No	No	No	No	0	0
458	508.308	1_Johor	SMK BANDAR SERI ALAM	28	Female	Malay	Degree	Married	No	No	Moderate	120	No Sedentary	<2	<3	Inadequate	7	7 hrs and above	62	No central obese	8	No Depression	8	Anxiety	8	No Stress	No	No	5.4	98	71	4.1	0.7	1.79	1.99	No	No	No	No	No	No	0	0
459	508.308	1_Johor	SMK BANDAR SERI ALAM	27	Female	Malay	Degree	Married	No	No	Low	165	No Sedentary	<2	<3	Inadequate	6.5	< 7 hrs	80	Central obese	4	No Depression	12	Anxiety	8	No Stress	No	No	4.7	116	69	7.5	1	5.51	1.54	No	No	No	No	No	No	0	0
461	508.308	1_Johor	SMK BANDAR SERI ALAM	24	Female	Malay	Degree	Single	No	No	Low	205	No Sedentary	<2	<3	Inadequate	6.43029	< 7 hrs	70	No central obese	6	No Depression	4	No Anxiety	8	No Stress	No	No	4.6	107	72	4.8	0.5	3.09	1.48	No	No	No	No	No	No	0	0
462	508.308	1_Johor	SMK BANDAR SERI ALAM	43	Female	Malay	Degree	Divorced/Widowed	Yes	No	Moderate	70	No Sedentary	<2	<3	Inadequate	6.5	< 7 hrs	80	Central obese	10	Depression	10	Anxiety	12	No Stress	No	No	5.5	141	97	6.9	2.8	4.21	1.42	No	No	No	No	No	Yes	0	0
463	508.308	1_Johor	SMK BANDAR SERI ALAM	46	Female	Malay	Degree	Married	No	No	High	120	No Sedentary	<2	<3	Inadequate	5.5	< 7 hrs	79	No central obese	0	No Depression	2	No Anxiety	0	No Stress	No	No	6.2	91	66	5.4	0.7	2.8	2.28	No	Yes	No	No	No	No		1
464	508.308	1_Johor	SMK BANDAR SERI ALAM	26	Female	Malay	Degree	Married	No	No	Low	30	No Sedentary	<2	<3	Inadequate	5.64231	< 7 hrs	86	Central obese	0	No Depression	10	Anxiety	12	No Stress	No	No	5.2	131	82	4.5	0.8	3.16	0.98	No	No	No	No	No	No	0	0
465	508.308	1_Johor	SMK BANDAR SERI ALAM	35	Female	Malay	Degree	Married	Yes	Yes	Low	240	No Sedentary	<2	<3	Inadequate	5	< 7 hrs	84	Central obese	0	No Depression	0	No Anxiety	0	No Stress	No	No	7	121	67	5.3	1.2	3.59	1.17	No	Yes	No	No	No	No		1
466	508.308	1_Johor	SMK BANDAR SERI ALAM	44	Female	Malay	Diploma and below	Married	No	No	Low	480	No Sedentary	<2	<3	Inadequate	6.5	< 7 hrs	97	Central obese	6	No Depression	2	No Anxiety	2	No Stress	No	No	4.6	122	83	5.7	1.1	3.75	1.45	No	No	No	No	No	No	0	0
468	508.308	1_Johor	SMK BANDAR SERI ALAM	39	Female	Malay	Degree	Married	No	No	Low	176	No Sedentary	<2	<3	Inadequate	5.5	< 7 hrs	92	Central obese	4	No Depression	8	Anxiety	8	No Stress	No	No	4.7	123	66	4.8	0.7	3.13	1.35	No	No	No	No	No	No	0	0
469	508.308	1_Johor	SMK BANDAR SERI ALAM	27	Female	Malay	Degree	Single	Yes	No	Moderate	180	No Sedentary	<2	<3	Inadequate	7	7 hrs and above	71.7692	No central obese	14	Depression	14	Anxiety	14	Stress	No	No	4.5	106	68	4	0.6	2.4	1.33	No	No	No	No	No	No	0	0
470	508.308	1_Johor	SMK BANDAR SERI ALAM	28	Female	Malay	Degree	Married	Yes	No	Low	120	No Sedentary	<2	<3	Inadequate	5.5	< 7 hrs	78	No central obese	16	Depression	16	Anxiety	15	Stress	No	No	4.3	116	65	5	0.9	2.36	2.23	No	No	No	No	No	No	0	0
471	508.308	1_Johor	SMK BANDAR SERI ALAM	34	Female	Malay	Degree	Married	Yes	No	Moderate	120	No Sedentary	<2	<3	Inadequate	5.5	< 7 hrs	77	No central obese	4	No Depression	2	No Anxiety	8	No Stress	No	No	5.2	98	67.7115	4.3	0.5	2.82	1.25	No	No	No	No	No	No	0	0
472	508.308	1_Johor	SMK BANDAR SERI ALAM	32	Female	Malay	Degree	Married	No	No	Low	240	No Sedentary	<2	<3	Inadequate	6.5	< 7 hrs	73	No central obese	4	No Depression	4	No Anxiety	2	No Stress	No	No	4.9	102	59	5.7	0.9	3.98	1.31	No	No	No	No	No	No	0	0
473	205.5	1_Johor	SMK BANDAR TENGGARA	44	Female	Malay	Degree	Married	Yes	Yes	Low	222	No Sedentary	<2	<3	Inadequate	6.5	< 7 hrs	78	No central obese	6	No Depression	18	Anxiety	18	Stress	No	No	5	107	66	4.2	0.8	2.44	1.4	No	No	No	No	No	No	0	0
474	205.5	1_Johor	SMK BANDAR TENGGARA	43	Female	Malay	Diploma and below	Married	No	No	High	178	No Sedentary	<2	<3	Inadequate	6	< 7 hrs	75	No central obese	4	No Depression	10	Anxiety	10	No Stress	No	No	4.6	113	77	6.3	1	4.15	1.7	No	No	No	No	No	No	0	0
475	205.5	1_Johor	SMK BANDAR TENGGARA	56	Female	Malay	Diploma and below	Married	Yes	No	Moderate	120	No Sedentary	<2	<3	Inadequate	6	< 7 hrs	109	Central obese	2	No Depression	4	No Anxiety	4	No Stress	No	No	4.4	127	65	6.7	0.6	4.13	2.3	No	No	No	No	No	No	0	0
476	205.5	1_Johor	SMK BANDAR TENGGARA	33	Female	Malay	Master and above	Single	No	No	Low	240	No Sedentary	>=2	<3	Inadequate	8.5	7 hrs and above	86	Central obese	2	No Depression	20	Anxiety	16	Stress	No	No	4.1	121	73	5.3	1.6	3.57	1	No	No	No	No	No	No	0	0
477	205.5	1_Johor	SMK BANDAR TENGGARA	28	Female	Malay	Degree	Single	No	No	Low	330	No Sedentary	<2	<3	Inadequate	5	< 7 hrs	67	No central obese	2	No Depression	10	Anxiety	6	No Stress	No	No	4.4	101	65	4.4	0.5	2.47	1.7	No	No	No	No	No	No	0	0
478	205.5	1_Johor	SMK BANDAR TENGGARA	51	Female	Malay	Degree	Married	Yes	No	Low	198	No Sedentary	<2	<3	Inadequate	5	< 7 hrs	88	Central obese	4	No Depression	12	Anxiety	12	No Stress	No	No	14.1	149	83	6.6	1.68269	3.82	1.1	Yes	No	Yes	No	Yes	Yes		1
479	205.5	1_Johor	SMK BANDAR TENGGARA	26	Female	Malay	Degree	Single	Yes	No	Low	170	No Sedentary	<2	<3	Inadequate	7	7 hrs and above	71.0135	No central obese	6	No Depression	6	No Anxiety	6	No Stress	No	No	4.2	116	72	4.5	0.6	2.23	2	No	No	No	No	No	No	0	0
480	205.5	1_Johor	SMK BANDAR TENGGARA	35	Female	Malay	Diploma and below	Married	Yes	No	Low	60	No Sedentary	<2	<3	Inadequate	4	< 7 hrs	89	Central obese	10	Depression	14	Anxiety	14	Stress	No	No	4.2	127	75	4.6	1.5	2.42	1.5	No	No	No	No	No	Yes	0	0
481	205.5	1_Johor	SMK BANDAR TENGGARA	48	Female	Malay	Degree	Married	No	Yes	Low	180	No Sedentary	<2	<3	Inadequate	7	7 hrs and above	86	Central obese	4	No Depression	10	Anxiety	20	Stress	No	No	5.2	131.654	78.3462	5.6	1.3	3.81	1.2	No	No	No	No	No	No	0	0
483	205.5	1_Johor	SMK BANDAR TENGGARA	29	Female	Malay	Degree	Married	No	No	Low	191	No Sedentary	<2	<3	Inadequate	7	7 hrs and above	83	Central obese	0	No Depression	8	Anxiety	12	No Stress	No	No	6.1	106	78	4.6	0.9	2.89	1.3	No	Yes	No	No	No	No		1
484	205.5	1_Johor	SMK BANDAR TENGGARA	39	Female	Malay	Degree	Married	Yes	No	Moderate	240	No Sedentary	<2	<3	Inadequate	5.5	< 7 hrs	81	Central obese	4	No Depression	10	Anxiety	8	No Stress	No	No	4.7	128	77	7.4	1.2	5.26	1.6	No	No	No	No	No	No	0	0
485	205.5	1_Johor	SMK BANDAR TENGGARA	38	Female	Malay	Degree	Single	No	No	Low	30	No Sedentary	>=2	<3	Inadequate	6.12981	< 7 hrs	76	No central obese	6	No Depression	12	Anxiety	10	No Stress	No	No	4.9	123	73	4.6	0.5	2.77	1.6	No	No	No	No	No	No	0	0
488	205.5	1_Johor	SMK BANDAR TENGGARA	32	Female	Malay	Degree	Married	No	No	Moderate	149	No Sedentary	<2	<3	Inadequate	6.47019	< 7 hrs	73	No central obese	14	Depression	14	Anxiety	14	Stress	No	No	5.4	123	75	5.8	0.7	3.68	1.8	No	No	No	No	No	No	0	0
489	205.5	1_Johor	SMK BANDAR TENGGARA	55	Female	Malay	Degree	Married	No	No	Moderate	30	No Sedentary	<2	<3	Inadequate	5	< 7 hrs	75	No central obese	2	No Depression	6	No Anxiety	4	No Stress	No	No	4.8	131	79	5.5	1.7	3.23	1.5	No	No	No	No	No	No	0	0
490	62.149	1_Johor	SMK BUKIT PASIR	49	Male	Malay	Master and above	Married	Yes	No	High	480	No Sedentary	<2	<3	Inadequate	8	7 hrs and above	107.5	Central obese	0	No Depression	2	No Anxiety	0	No Stress	No	No	8.93846	140.077	90	5.9	1.7	3.63	1.5	Yes	No	Yes	Yes	No	No		1
491	62.149	1_Johor	SMK BUKIT PASIR	47	Male	Indian	Master and above	Married	Yes	No	High	330	No Sedentary	<2	<3	Inadequate	7	7 hrs and above	110.8	Central obese	0	No Depression	6	No Anxiety	0	No Stress	No	No	4.6	132	75	4.5	0.8	2.94	1.2	No	No	No	No	No	Yes	0	0
492	62.149	1_Johor	SMK BUKIT PASIR	46	Female	Malay	Degree	Married	No	No	Low	200	No Sedentary	<2	<3	Inadequate	9	7 hrs and above	102	Central obese	2	No Depression	18	Anxiety	18	Stress	No	No	4.7	145	77	5.6	2.5	3.36	1.1	No	No	No	No	Yes	Yes	0	0
493	62.149	1_Johor	SMK BUKIT PASIR	46	Female	Chinese	Degree	Married	No	No	Moderate	209	No Sedentary	<2	<3	Inadequate	8	7 hrs and above	89	Central obese	8	No Depression	2	No Anxiety	10	No Stress	No	No	4.8	125	69	6.7	1.2	4.66	1.5	No	No	No	No	No	Yes	0	0
494	62.149	1_Johor	SMK BUKIT PASIR	45	Male	Malay	Degree	Married	Yes	No	High	180	No Sedentary	<2	<3	Inadequate	7.66615	7 hrs and above	102	Central obese	8	No Depression	10	Anxiety	14	Stress	No	No	4.9	139	92	4.3	2.1	2.35	1	No	No	No	No	Yes	Yes	0	0
495	62.149	1_Johor	SMK BUKIT PASIR	40	Female	Malay	Degree	Married	No	No	Moderate	120	No Sedentary	<2	<3	Inadequate	5.5	< 7 hrs	98.2	Central obese	14	Depression	18	Anxiety	16	Stress	No	No	4.5	155	96	6.2	2.3	3.66	1.5	No	No	No	No	No	Yes	0	0
496	62.149	1_Johor	SMK BUKIT PASIR	25	Female	Malay	Degree	Single	Yes	No	Moderate	153	No Sedentary	<2	<3	Inadequate	6.39712	< 7 hrs	65.5	No central obese	0	No Depression	0	No Anxiety	4	No Stress	No	No	4.7	113	78	5.6	0.5	2.77	1.65577	No	No	No	No	No	No	0	0
497	62.149	1_Johor	SMK BUKIT PASIR	29	Female	Malay	Degree	Married	Yes	No	Moderate	208	No Sedentary	<2	<3	Inadequate	6	< 7 hrs	85	Central obese	2	No Depression	12	Anxiety	6	No Stress	No	No	4.5	121	61	6.6	0.6	4.43	1.9	No	No	No	No	No	No	0	0
498	62.149	1_Johor	SMK BUKIT PASIR	39	Female	Malay	Degree	Married	Yes	No	Moderate	161	No Sedentary	<2	<3	Inadequate	5.5	< 7 hrs	105	Central obese	4	No Depression	8	Anxiety	8	No Stress	No	No	6.88269	137	86	4.4	1.9	2.14	1.4	No	No	Yes	No	No	No		1
499	62.149	1_Johor	SMK BUKIT PASIR	33	Female	Malay	Degree	Married	No	No	High	120	No Sedentary	<2	<3	Inadequate	6.5	< 7 hrs	85.5	Central obese	0	No Depression	10	Anxiety	8	No Stress	No	No	4.94808	128	79	5.7	1.9	3.84	1	No	No	No	No	No	No	0	0
500	62.149	1_Johor	SMK BUKIT PASIR	29	Female	Malay	Degree	Married	Yes	No	Moderate	120	No Sedentary	<2	<3	Inadequate	6.5	< 7 hrs	80.5	Central obese	4	No Depression	2	No Anxiety	8	No Stress	No	No	4.56923	105	60	5.8	0.6	3.23	2.3	No	No	No	No	No	No	0	0
501	62.149	1_Johor	SMK BUKIT PASIR	29	Female	Malay	Degree	Married	No	No	Moderate	300	No Sedentary	<2	<3	Inadequate	6	< 7 hrs	110	Central obese	16	Depression	18	Anxiety	16	Stress	No	No	4.8	117	82	4	0.9	2.09	1.5	No	No	No	No	No	No	0	0
502	62.149	1_Johor	SMK BUKIT PASIR	40	Male	Malay	Degree	Married	Yes	No	Low	178	No Sedentary	<2	<3	Inadequate	5.5	< 7 hrs	90.6192	Central obese	2	No Depression	6	No Anxiety	10	No Stress	No	No	10.6	143	100	5.5	0.9	3.59	1.5	Yes	No	Yes	Yes	No	No		1
503	62.149	1_Johor	SMK BUKIT PASIR	51	Female	Malay	Degree	Divorced/Widowed	Yes	No	Low	60	No Sedentary	<2	<3	Inadequate	6	< 7 hrs	78.1	No central obese	0	No Depression	8	Anxiety	4	No Stress	No	No	4.9	130	84	5.1	0.7	2.88	1.9	No	No	No	No	No	No	0	0
504	62.149	1_Johor	SMK BUKIT PASIR	32	Female	Malay	Degree	Married	No	No	High	600	sedentary	<2	>=3	Inadequate	6	< 7 hrs	71.8	No central obese	22	Depression	12	Anxiety	18	Stress	No	No	4.8	117	76	5	0.6	3.13	1.6	No	No	No	No	No	No	0	0
505	62.149	1_Johor	SMK BUKIT PASIR	36	Female	Malay	Degree	Married	No	No	Low	177	No Sedentary	<2	<3	Inadequate	5.5	< 7 hrs	65.1	No central obese	2	No Depression	6	No Anxiety	8	No Stress	No	No	4.2	95	62	4.6	0.8	2.64	1.6	No	No	No	No	No	No	0	0
506	62.149	1_Johor	SMK BUKIT PASIR	30	Female	Malay	Degree	Single	Yes	No	High	60	No Sedentary	>=2	<3	Inadequate	7	7 hrs and above	84.1	Central obese	0	No Depression	2	No Anxiety	4	No Stress	No	No	5.3	114	77	5.3	0.6	3.33	1.7	No	No	No	No	No	No	0	0
507	62.149	1_Johor	SMK BUKIT PASIR	54	Male	Malay	Diploma and below	Single	Yes	No	Low	212	No Sedentary	<2	<3	Inadequate	6	< 7 hrs	103.6	Central obese	8	No Depression	14	Anxiety	16	Stress	Yes	No	6.8	133	76	7.7	1.58269	4.61	1.5	No	Yes	No	No	Yes	Yes		1
508	62.149	1_Johor	SMK BUKIT PASIR	38	Female	Malay	Degree	Married	No	No	Low	169	No Sedentary	<2	<3	Inadequate	5.5	< 7 hrs	81.7	Central obese	4	No Depression	2	No Anxiety	2	No Stress	No	No	5.2	120	72	4	0.6	2.33	1.4	No	No	No	No	No	No	0	0
511	62.149	1_Johor	SMK BUKIT PASIR	46	Female	Malay	Degree	Married	Yes	No	Low	240	No Sedentary	<2	<3	Inadequate	6.5	< 7 hrs	90.8	Central obese	4	No Depression	0	No Anxiety	6	No Stress	No	No	5.8	143	79	4.5	0.7	2.78	1.4	No	Yes	No	No	Yes	No	1	0
512	62.149	1_Johor	SMK BUKIT PASIR	53	Female	Malay	Degree	Married	Yes	No	High	240	No Sedentary	<2	<3	Inadequate	6	< 7 hrs	83	Central obese	2	No Depression	2	No Anxiety	4	No Stress	No	No	6.4	136	68	5.3	0.7	3.58	1.4	No	Yes	No	No	No	No		1
513	62.149	1_Johor	SMK BUKIT PASIR	30	Female	Chinese	Degree	Married	No	No	High	300	No Sedentary	>=2	>=3	Adequate	9	7 hrs and above	73.6	No central obese	0	No Depression	2	No Anxiety	2	No Stress	No	No	4.7	111	66	4.7	0.6	2.93	1.5	No	No	No	No	No	No	0	0
514	62.149	1_Johor	SMK BUKIT PASIR	33	Female	Chinese	Degree	Single	No	No	Moderate	240	No Sedentary	<2	<3	Inadequate	6	< 7 hrs	74.5	No central obese	20	Depression	20	Anxiety	28	Stress	No	No	5.2	150	83	4.7	1	2.75	1.5	No	No	No	No	No	No	0	0
515	62.149	1_Johor	SMK BUKIT PASIR	31	Female	Chinese	Degree	Married	Yes	No	High	420	No Sedentary	<2	<3	Inadequate	7	7 hrs and above	73	No central obese	4	No Depression	8	Anxiety	6	No Stress	No	No	4.8	105	69	4.1	0.5	2.27	1.6	No	No	No	No	No	No	0	0
516	62.149	1_Johor	SMK BUKIT PASIR	55	Female	Malay	Diploma and below	Married	Yes	No	Low	199	No Sedentary	<2	<3	Inadequate	5	< 7 hrs	92	Central obese	4	No Depression	8	Anxiety	8	No Stress	No	No	4.9	145	97	6	1.3	3.81	1.6	No	No	No	No	No	Yes	0	0
517	62.149	1_Johor	SMK BUKIT PASIR	48	Male	Malay	Master and above	Married	Yes	No	High	196	No Sedentary	>=2	<3	Inadequate	6.97115	< 7 hrs	94.6	Central obese	0	No Depression	10	Anxiety	8	No Stress	No	No	5.5	134	82	6.1	1.35385	3.87192	1.68	No	No	No	No	No	No	0	0
518	62.149	1_Johor	SMK BUKIT PASIR	53	Female	Malay	Degree	Married	No	No	Low	120	No Sedentary	<2	>=3	Inadequate	6	< 7 hrs	85.6	Central obese	2	No Depression	2	No Anxiety	6	No Stress	No	No	4.7	94	60	5.6	0.8	3.64	1.6	No	No	No	No	No	Yes	0	0
519	62.149	1_Johor	SMK BUKIT PASIR	50	Female	Malay	Diploma and below	Married	No	No	Low	184	No Sedentary	<2	<3	Inadequate	5.5	< 7 hrs	91.6	Central obese	10	Depression	18	Anxiety	24	Stress	No	No	5.3	127	72	5.7	0.8	3.84	1.5	No	No	No	No	Yes	No	0	0
520	62.149	1_Johor	SMK BUKIT PASIR	56	Male	Malay	Diploma and below	Married	No	No	High	182	No Sedentary	>=2	<3	Inadequate	6.5	< 7 hrs	84.9	No central obese	0	No Depression	10	Anxiety	8	No Stress	No	No	4.6	172	76	5.2	0.9	3.49	1.3	No	No	No	No	No	No	0	0
521	62.149	1_Johor	SMK BUKIT PASIR	27	Female	Chinese	Degree	Single	Yes	No	Moderate	190	No Sedentary	<2	<3	Inadequate	8.5	7 hrs and above	73	No central obese	4	No Depression	4	No Anxiety	6	No Stress	No	No	4.9	117	73	3.9	0.5	1.87	1.8	No	No	No	No	No	No	0	0
522	62.149	1_Johor	SMK BUKIT PASIR	41	Female	Malay	Diploma and below	Married	Yes	No	Low	197	No Sedentary	<2	<3	Inadequate	5.5	< 7 hrs	108.1	Central obese	0	No Depression	4	No Anxiety	10	No Stress	No	No	4.7	132	75	5.2	1.6	3.17	1.3	No	No	No	No	No	No	0	0
523	62.149	1_Johor	SMK BUKIT PASIR	40	Female	Malay	Degree	Married	No	No	Low	60	No Sedentary	<2	<3	Inadequate	4.5	< 7 hrs	103	Central obese	12	Depression	18	Anxiety	24	Stress	No	No	5.5	144	76	5.3	0.9	3.69	1.2	No	No	No	No	No	No	0	0
524	62.149	1_Johor	SMK BUKIT PASIR	50	Male	Malay	Master and above	Married	Yes	No	High	240	No Sedentary	>=2	<3	Inadequate	6	< 7 hrs	113.5	Central obese	0	No Depression	6	No Anxiety	4	No Stress	No	No	8.2	116	77	3.9	2.8	1.83	0.8	Yes	No	Yes	Yes	Yes	No		1
525	62.149	1_Johor	SMK BUKIT PASIR	47	Female	Chinese	Degree	Married	No	No	High	90	No Sedentary	<2	<3	Inadequate	6.5	< 7 hrs	91.1	Central obese	12	Depression	14	Anxiety	14	Stress	No	No	4.4	129	86	5.9	1	4.05	1.4	No	No	No	No	No	Yes	0	0
526	62.149	1_Johor	SMK BUKIT PASIR	44	Female	Malay	Degree	Divorced/Widowed	No	No	Low	192	No Sedentary	<2	<3	Inadequate	5	< 7 hrs	73.5	No central obese	2	No Depression	6	No Anxiety	10	No Stress	No	No	5.4	105	63	5.7	0.9	3.69	1.6	No	No	No	No	No	Yes	0	0
527	62.149	1_Johor	SMK BUKIT PASIR	38	Female	Malay	Degree	Married	No	No	High	180	No Sedentary	<2	<3	Inadequate	5.5	< 7 hrs	76	No central obese	8	No Depression	8	Anxiety	4	No Stress	No	No	4.4	106	68.6538	4.8	0.9	3.19	1.2	No	No	No	No	No	No	0	0
528	62.149	1_Johor	SMK BUKIT PASIR	40	Female	Malay	Degree	Married	No	No	Low	250	No Sedentary	<2	<3	Inadequate	5	< 7 hrs	83.5	Central obese	30	Depression	26	Anxiety	38	Stress	No	No	4.9	107	67	5.6	0.7	3.28	2	No	No	No	No	No	No	0	0
529	62.149	1_Johor	SMK BUKIT PASIR	49	Male	Malay	Degree	Married	Yes	No	High	300	No Sedentary	<2	<3	Inadequate	5	< 7 hrs	111	Central obese	4	No Depression	4	No Anxiety	12	No Stress	No	No	4.5	135	99	6.3	1.3	4.11	1.6	No	No	No	No	No	Yes	0	0
530	62.149	1_Johor	SMK BUKIT PASIR	43	Female	Chinese	Degree	Single	No	No	Low	225	No Sedentary	<2	<3	Inadequate	7.5	7 hrs and above	76.7192	No central obese	4	No Depression	2	No Anxiety	8	No Stress	No	No	4.5	124	80	5.1	1.1	2.9	1.7	No	No	No	No	No	No	0	0
531	62.149	1_Johor	SMK BUKIT PASIR	48	Male	Malay	Degree	Married	Yes	No	High	360	No Sedentary	<2	<3	Inadequate	5.5	< 7 hrs	84.5	No central obese	8	No Depression	14	Anxiety	14	Stress	Yes	No	5.2	98	60	7.2	1.425	4.18635	1.38962	No	No	No	No	No	No	0	0
532	62.149	1_Johor	SMK BUKIT PASIR	32	Female	Malay	Degree	Married	Yes	No	Moderate	480	No Sedentary	>=2	<3	Inadequate	8	7 hrs and above	85	Central obese	2	No Depression	6	No Anxiety	2	No Stress	No	No	4.3	128	76	4.2	0.6	2.63	1.3	No	No	No	No	No	No	0	0
533	62.149	1_Johor	SMK BUKIT PASIR	53	Male	Malay	Degree	Married	No	No	High	180	No Sedentary	>=2	>=3	Adequate	6	< 7 hrs	89	No central obese	0	No Depression	0	No Anxiety	0	No Stress	No	No	5.5	164	90	5.2	1.5	3.42	1.1	No	No	No	No	No	No	0	0
534	55.447	1_Johor	SMK CHAAH	27	Female	Malay	Master and above	Single	Yes	No	Moderate	10	No Sedentary	<2	<3	Inadequate	6.5	< 7 hrs	74	No central obese	0	No Depression	0	No Anxiety	2	No Stress	No	No	4.8	118	75	4.9	0.8	3.34	1.2	No	No	No	No	No	No	0	0
538	55.447	1_Johor	SMK CHAAH	39	Female	Malay	Degree	Single	Yes	No	Low	175	No Sedentary	<2	<3	Inadequate	6.5	< 7 hrs	87.1	Central obese	10	Depression	10	Anxiety	12	No Stress	No	No	4.7	131	79	5.3	0.6	3.33	1.7	No	No	No	No	No	No	0	0
539	55.447	1_Johor	SMK CHAAH	41	Female	Malay	Master and above	Married	Yes	No	Low	195	No Sedentary	<2	<3	Inadequate	7	7 hrs and above	70	No central obese	10	Depression	12	Anxiety	10	No Stress	No	No	4.6	141	81	5.2	0.8	3.24	1.6	No	No	No	No	No	No	0	0
540	55.447	1_Johor	SMK CHAAH	40	Female	Malay	Degree	Married	Yes	Yes	Low	180	No Sedentary	<2	<3	Inadequate	6.5	< 7 hrs	74	No central obese	16	Depression	10	Anxiety	16	Stress	No	No	4.9	126	92	5	0.5	3.77	1	No	No	No	No	No	No	0	0
541	55.447	1_Johor	SMK CHAAH	47	Male	Malay	Diploma and below	Married	Yes	No	Moderate	300	No Sedentary	>=2	<3	Inadequate	5	< 7 hrs	90	Central obese	2	No Depression	4	No Anxiety	8	No Stress	No	No	9.3	115	73	4.9	1.5	2.92	1.3	Yes	No	Yes	Yes	No	No		1
542	55.447	1_Johor	SMK CHAAH	42	Female	Malay	Degree	Married	Yes	No	Low	182	No Sedentary	<2	<3	Inadequate	6	< 7 hrs	82.5	Central obese	12	Depression	14	Anxiety	20	Stress	No	No	5.1	150	93	5.1	1.2	3.16	1.4	No	No	No	No	No	No	0	0
543	55.447	1_Johor	SMK CHAAH	46	Female	Malay	Degree	Married	Yes	No	Low	215	No Sedentary	<2	<3	Inadequate	5	< 7 hrs	91	Central obese	0	No Depression	2	No Anxiety	2	No Stress	No	No	4.9	137	86	7.1	1.8	4.28	2	No	No	No	No	No	No	0	0
544	55.447	1_Johor	SMK CHAAH	50	Female	Malay	Degree	Married	No	No	Low	120	No Sedentary	>=2	>=3	Adequate	5.5	< 7 hrs	82	Central obese	0	No Depression	4	No Anxiety	4	No Stress	No	No	4.8	159	100	6.9	1.5	5.02	1.2	No	No	No	No	Yes	No	0	0
545	55.447	1_Johor	SMK CHAAH	37	Male	Malay	Degree	Married	No	No	Moderate	178	No Sedentary	<2	<3	Inadequate	6	< 7 hrs	93.9269	Central obese	0	No Depression	10	Anxiety	2	No Stress	No	No	5.8	154	103	4.4	1	2.85	1.1	No	Yes	No	No	No	No	1	0
546	55.447	1_Johor	SMK CHAAH	35	Male	Malay	Master and above	Married	No	No	High	120	No Sedentary	<2	<3	Inadequate	6	< 7 hrs	98.5	Central obese	2	No Depression	6	No Anxiety	8	No Stress	No	No	5.6	125	90	4.5	2	2.79	0.8	No	Yes	No	No	No	No	1	0
547	55.447	1_Johor	SMK CHAAH	39	Female	Malay	Degree	Married	No	No	Moderate	165	No Sedentary	<2	<3	Inadequate	7.5	7 hrs and above	76.5	No central obese	14	Depression	10	Anxiety	14	Stress	No	No	4.5	124	62	4.4	0.8	2.44	1.6	No	No	No	No	No	No	0	0
548	55.447	1_Johor	SMK CHAAH	50	Female	Malay	Master and above	Married	No	No	Moderate	240	No Sedentary	>=2	<3	Inadequate	5.5	< 7 hrs	75	No central obese	8	No Depression	10	Anxiety	12	No Stress	No	No	4.4	111	70	6.2	0.6	3.53	1.60673	No	No	No	No	No	Yes	0	0
549	55.447	1_Johor	SMK CHAAH	42	Female	Malay	Degree	Married	No	No	Moderate	134	No Sedentary	<2	>=3	Inadequate	6.5	< 7 hrs	81.1	Central obese	2	No Depression	8	Anxiety	2	No Stress	No	No	4.6	122	80	6.9	1.2	4.46	1.9	No	No	No	No	No	No	0	0
550	55.447	1_Johor	SMK CHAAH	30	Female	Malay	Degree	Married	No	No	Low	30	No Sedentary	<2	<3	Inadequate	5.5	< 7 hrs	62	No central obese	4	No Depression	8	Anxiety	10	No Stress	No	No	4.68462	110	64	5.2	0.5	2.37	1.65923	No	No	No	No	No	No	0	0
552	55.447	1_Johor	SMK CHAAH	37	Female	Malay	Master and above	Married	Yes	No	Low	300	No Sedentary	<2	<3	Inadequate	7	7 hrs and above	70	No central obese	0	No Depression	6	No Anxiety	2	No Stress	No	No	4.2	117	73	4.8	0.7	2.68	1.8	No	No	No	No	No	No	0	0
553	55.447	1_Johor	SMK CHAAH	32	Female	Malay	Degree	Married	No	No	Moderate	60	No Sedentary	<2	<3	Inadequate	7	7 hrs and above	67.8	No central obese	2	No Depression	10	Anxiety	8	No Stress	No	No	4.2	119	69	4.6	0.6	2.73	1.6	No	No	No	No	No	No	0	0
554	55.447	1_Johor	SMK CHAAH	49	Male	Malay	Degree	Married	Yes	No	Low	120	No Sedentary	<2	<3	Inadequate	6	< 7 hrs	102	Central obese	4	No Depression	6	No Anxiety	6	No Stress	No	No	10.4	147	105	5.7	1.62692	3.1	1.1	No	Yes	No	No	No	No		1
557	55.447	1_Johor	SMK CHAAH	39	Female	Indian	Master and above	Married	No	Yes	Low	180	No Sedentary	<2	<3	Inadequate	8	7 hrs and above	85	Central obese	2	No Depression	6	No Anxiety	10	No Stress	No	No	4.5	123	89	5.4	0.8	3.84	1.2	No	No	No	No	No	No	0	0
558	55.447	1_Johor	SMK CHAAH	33	Female	Malay	Degree	Married	Yes	No	Low	120	No Sedentary	<2	<3	Inadequate	7.5	7 hrs and above	67.5	No central obese	6	No Depression	10	Anxiety	12	No Stress	No	No	4.2	123	69	3.9	0.7	2.38	1.2	No	No	No	No	No	No	0	0
559	55.447	1_Johor	SMK CHAAH	43	Female	Chinese	Degree	Single	No	No	Low	120	No Sedentary	>=2	>=3	Adequate	6	< 7 hrs	87	Central obese	4	No Depression	8	Anxiety	6	No Stress	No	No	4.9	110	74	5.3	0.9	3.49	1.4	No	No	No	No	No	No	0	0
560	55.447	1_Johor	SMK CHAAH	43	Male	Chinese	Degree	Single	No	No	Moderate	120	No Sedentary	<2	<3	Inadequate	7.5	7 hrs and above	62	No central obese	0	No Depression	4	No Anxiety	0	No Stress	No	No	4.4	104	63	4.4	0.5	2.67	1.5	No	No	No	No	No	No	0	0
561	55.447	1_Johor	SMK CHAAH	51	Female	Malay	Degree	Married	Yes	No	High	120	No Sedentary	>=2	<3	Inadequate	7.5	7 hrs and above	80	Central obese	0	No Depression	4	No Anxiety	2	No Stress	No	No	4.7	167	82	6.1	2.1	3.65	1.5	No	No	No	No	No	No	0	0
562	55.447	1_Johor	SMK CHAAH	33	Male	Malay	Diploma and below	Married	No	No	High	240	No Sedentary	<2	<3	Inadequate	6.5	< 7 hrs	79	No central obese	8	No Depression	6	No Anxiety	14	Stress	Yes	No	4.6	110	62	5.3	0.9	3.59	1.3	No	No	No	No	No	No	0	0
563	55.447	1_Johor	SMK CHAAH	37	Male	Chinese	Degree	Married	Yes	No	High	120	No Sedentary	<2	<3	Inadequate	8	7 hrs and above	62	No central obese	10	Depression	0	No Anxiety	8	No Stress	No	No	4.4	108	68	5.3	0.7	2.68	2.3	No	No	No	No	No	No	0	0
564	55.447	1_Johor	SMK CHAAH	44	Female	Chinese	Degree	Married	Yes	No	High	35	No Sedentary	<2	<3	Inadequate	6.5	< 7 hrs	74	No central obese	14	Depression	16	Anxiety	16	Stress	No	No	4.4	130	85	5.5	1.2	3.06	1.9	No	No	No	No	No	No	0	0
565	55.447	1_Johor	SMK CHAAH	39	Female	Chinese	Degree	Married	No	No	Low	230	No Sedentary	<2	<3	Inadequate	5.5	< 7 hrs	76	No central obese	12	Depression	14	Anxiety	24	Stress	No	No	4.6	110	75	5.6	0.7	3.68	1.6	No	No	No	No	No	No	0	0
568	55.447	1_Johor	SMK CHAAH	47	Male	Indian	Degree	Married	Yes	No	Moderate	188	No Sedentary	<2	<3	Inadequate	6	< 7 hrs	88	No central obese	0	No Depression	0	No Anxiety	0	No Stress	No	No	4.6	127	81	5	1.4	3.16	1.2	No	No	No	No	No	No	0	0
569	55.447	1_Johor	SMK CHAAH	50	Male	Indian	Degree	Married	Yes	No	Moderate	180	No Sedentary	<2	<3	Inadequate	6	< 7 hrs	93.5	Central obese	6	No Depression	2	No Anxiety	4	No Stress	No	No	6.3	149	91	4.4	2	2.49	1	No	No	Yes	Yes	Yes	No		1
570	55.447	1_Johor	SMK CHAAH	46	Male	Malay	Degree	Married	Yes	No	High	300	No Sedentary	>=2	>=3	Adequate	7.5	7 hrs and above	91	Central obese	0	No Depression	0	No Anxiety	0	No Stress	No	No	4.6	136	99	5.19615	1.6	3.28058	0.9	No	No	No	No	No	No	0	0
571	55.447	1_Johor	SMK CHAAH	28	Female	Malay	Diploma and below	Married	No	Yes	Low	171	No Sedentary	<2	<3	Inadequate	8.5	7 hrs and above	77	No central obese	14	Depression	14	Anxiety	14	Stress	No	No	4.6	113	69	4.4	2.6	2.32	0.9	No	No	No	No	No	No	0	0
572	55.447	1_Johor	SMK CHAAH	24	Female	Malay	Degree	Single	Yes	No	Low	197	No Sedentary	<2	<3	Inadequate	5.5	< 7 hrs	71.9673	No central obese	4	No Depression	0	No Anxiety	4	No Stress	No	No	4.5	118	69	5.7	0.8	3.44	1.9	No	No	No	No	No	No	0	0
573	55.447	1_Johor	SMK CHAAH	29	Male	Malay	Degree	Married	Yes	No	High	180	No Sedentary	<2	<3	Inadequate	6.5	< 7 hrs	89.9846	No central obese	6	No Depression	8	Anxiety	10	No Stress	No	No	4.7	133	88	5.4	1.2	3.66	1.2	No	No	No	No	Yes	No	0	0
574	55.447	1_Johor	SMK CHAAH	35	Male	Malay	Degree	Married	No	No	Low	182	No Sedentary	<2	<3	Inadequate	5	< 7 hrs	78	No central obese	12	Depression	4	No Anxiety	12	No Stress	No	No	4.7	123	79	4.9	1.2	3.26	1.1	No	No	No	No	No	No	0	0
575	261.496	1_Johor	SMK CONVENT (M)	28	Female	Malay	Degree	Single	No	No	Low	360	No Sedentary	<2	<3	Inadequate	5	< 7 hrs	66	No central obese	0	No Depression	2	No Anxiety	4	No Stress	No	No	4.4	107	75	4.9	0.6	2.93	1.7	No	No	No	No	No	No	0	0
576	261.496	1_Johor	SMK CONVENT (M)	46	Female	Malay	Master and above	Married	Yes	No	Low	120	No Sedentary	<2	<3	Inadequate	7	7 hrs and above	81.3	Central obese	4	No Depression	8	Anxiety	12	No Stress	No	No	5.9	174	93	5.3	2.9	2.78	1.2	No	Yes	No	No	No	No	1	0
577	261.496	1_Johor	SMK CONVENT (M)	53	Female	Malay	Degree	Single	Yes	No	Moderate	195	No Sedentary	<2	<3	Inadequate	6	< 7 hrs	79.2154	No central obese	14	Depression	14	Anxiety	14	Stress	No	No	4.6	126	75.3462	6.1	1.2	3.46	2.1	No	No	No	No	No	No	0	0
578	261.496	1_Johor	SMK CONVENT (M)	42	Female	Chinese	Degree	Single	No	No	Low	249	No Sedentary	>=2	<3	Inadequate	6	< 7 hrs	66.9	No central obese	20	Depression	16	Anxiety	24	Stress	No	No	4.6	100	59	5.3	1.1	3.3	1.5	No	No	No	No	No	Yes	0	0
579	261.496	1_Johor	SMK CONVENT (M)	46	Female	Malay	Degree	Married	Yes	No	Low	180	No Sedentary	<2	>=3	Inadequate	6	< 7 hrs	81	Central obese	8	No Depression	12	Anxiety	10	No Stress	No	No	7.9	132	71	5.61538	2.1	3.54692	1	Yes	No	Yes	Yes	No	No		1
580	261.496	1_Johor	SMK CONVENT (M)	55	Female	Malay	Degree	Married	Yes	No	Low	188	No Sedentary	<2	<3	Inadequate	5.5	< 7 hrs	78	No central obese	0	No Depression	0	No Anxiety	0	No Stress	No	No	6	125	73	4.7	0.8	2.74	1.7	No	No	Yes	Yes	Yes	Yes		1
581	261.496	1_Johor	SMK CONVENT (M)	53	Male	Malay	Master and above	Divorced/Widowed	No	No	High	540	No Sedentary	<2	<3	Inadequate	5.5	< 7 hrs	80	No central obese	2	No Depression	4	No Anxiety	2	No Stress	No	No	5.2	154	96	4.8	0.6	3.23	1.3	No	No	No	No	No	No	0	0
582	261.496	1_Johor	SMK CONVENT (M)	44	Female	Malay	Degree	Married	No	No	Low	30	No Sedentary	<2	<3	Inadequate	6	< 7 hrs	68	No central obese	10	Depression	12	Anxiety	14	Stress	No	No	4.6	138	73	6	0.5	3.27	1.68308	No	No	No	No	No	No	0	0
583	261.496	1_Johor	SMK CONVENT (M)	52	Female	Chinese	Degree	Married	No	No	Moderate	300	No Sedentary	<2	<3	Inadequate	6.5	< 7 hrs	71.5	No central obese	10	Depression	18	Anxiety	22	Stress	No	No	4.5	109	70	5.3	1.3	3.21	1.5	No	No	No	No	No	Yes	0	0
584	261.496	1_Johor	SMK CONVENT (M)	57	Female	Malay	Master and above	Married	Yes	No	Moderate	120	No Sedentary	<2	<3	Inadequate	8.5	7 hrs and above	108.5	Central obese	14	Depression	14	Anxiety	14	Stress	No	No	5.9	157	96	4.8	1.3	2.51	1.7	No	No	Yes	Yes	Yes	Yes		1
585	261.496	1_Johor	SMK CONVENT (M)	42	Female	Malay	Degree	Married	Yes	No	Low	120	No Sedentary	<2	<3	Inadequate	6.5	< 7 hrs	71.5	No central obese	4	No Depression	4	No Anxiety	6	No Stress	No	No	4.9	124	77	5.2	1.1	2.7	2	No	No	No	No	No	No	0	0
586	261.496	1_Johor	SMK CONVENT (M)	43	Female	Malay	Degree	Married	No	No	Moderate	180	No Sedentary	<2	<3	Inadequate	6.5	< 7 hrs	67	No central obese	6	No Depression	24	Anxiety	16	Stress	No	No	4.6	117	78	5.8	2	2.99	1.9	No	No	No	No	No	Yes	0	0
589	261.496	1_Johor	SMK CONVENT (M)	44	Female	Malay	Degree	Married	Yes	Yes	Moderate	240	No Sedentary	<2	<3	Inadequate	6.5	< 7 hrs	104	Central obese	12	Depression	22	Anxiety	26	Stress	No	No	4.2	137	91	5.3	1.6	2.97	1.6	No	No	No	No	No	No	0	0
592	72.899	1_Johor	SMK DATO` ALI HJ AHMAD	58	Female	Malay	Degree	Married	No	No	Low	192	No Sedentary	<2	<3	Inadequate	5	< 7 hrs	70	No central obese	4	No Depression	4	No Anxiety	6	No Stress	No	No	5	124	66	5.4	0.5	2.87	2.3	No	No	No	No	No	No	0	0
593	72.899	1_Johor	SMK DATO` ALI HJ AHMAD	48	Female	Malay	Degree	Married	No	No	High	240	No Sedentary	<2	<3	Inadequate	6	< 7 hrs	85	Central obese	0	No Depression	0	No Anxiety	0	No Stress	No	No	5.7	119	70	4.8	0.7	2.78	1.7	No	Yes	No	No	No	No	1	0
594	72.899	1_Johor	SMK DATO` ALI HJ AHMAD	39	Female	Malay	Degree	Married	Yes	No	Low	60	No Sedentary	<2	<3	Inadequate	5.5	< 7 hrs	81	Central obese	4	No Depression	6	No Anxiety	6	No Stress	No	No	6.1	103	63	6.2	1	4.35	1.4	No	Yes	No	No	No	No		1
595	72.899	1_Johor	SMK DATO` ALI HJ AHMAD	45	Female	Malay	Degree	Married	No	No	High	480	No Sedentary	>=2	<3	Inadequate	4	< 7 hrs	82	Central obese	0	No Depression	4	No Anxiety	6	No Stress	No	No	5	149	86	6.2	0.8	4.24	1.6	No	No	No	No	No	No	0	0
596	72.899	1_Johor	SMK DATO` ALI HJ AHMAD	44	Female	Malay	Master and above	Divorced/Widowed	Yes	No	Moderate	208	No Sedentary	<2	>=3	Inadequate	6	< 7 hrs	85	Central obese	2	No Depression	2	No Anxiety	10	No Stress	No	No	4.7	126	76	6.5	1.30769	3.31	1.6	No	No	Yes	Yes	No	No		1
597	72.899	1_Johor	SMK DATO` ALI HJ AHMAD	51	Female	Malay	Degree	Married	No	No	Moderate	235	No Sedentary	<2	<3	Inadequate	6	< 7 hrs	86	Central obese	4	No Depression	2	No Anxiety	12	No Stress	No	No	11.5	129	80	5.1	1.8	2.68	1.6	No	Yes	No	No	No	No		1
598	72.899	1_Johor	SMK DATO` ALI HJ AHMAD	50	Female	Malay	Degree	Married	Yes	No	Low	184	No Sedentary	<2	<3	Inadequate	5.5	< 7 hrs	90	Central obese	0	No Depression	0	No Anxiety	2	No Stress	No	No	5.6	121	77	4.3	2.4	1.91	1.3	No	Yes	No	No	Yes	No	1	0
599	72.899	1_Johor	SMK DATO` ALI HJ AHMAD	33	Female	Malay	Master and above	Married	Yes	No	Moderate	840	sedentary	<2	<3	Inadequate	6	< 7 hrs	76	No central obese	4	No Depression	14	Anxiety	18	Stress	No	No	4.5	119	70	4.8	0.823077	2.93	1.6	No	No	No	No	No	No	0	0
600	72.899	1_Johor	SMK DATO` ALI HJ AHMAD	49	Female	Malay	Degree	Married	No	No	High	181	No Sedentary	>=2	<3	Inadequate	6	< 7 hrs	81	Central obese	0	No Depression	0	No Anxiety	0	No Stress	No	No	5.1	164	92	5.5	1.3	3.31	1.6	No	No	No	No	No	No	0	0
601	72.899	1_Johor	SMK DATO` ALI HJ AHMAD	48	Female	Malay	Degree	Married	Yes	No	Low	177	No Sedentary	<2	<3	Inadequate	5	< 7 hrs	100	Central obese	0	No Depression	0	No Anxiety	2	No Stress	No	No	5	154	94	4.7	1.4	2.96	1.1	No	No	No	No	Yes	No	0	0
602	72.899	1_Johor	SMK DATO` ALI HJ AHMAD	53	Male	Malay	Degree	Married	Yes	No	Low	60	No Sedentary	<2	<3	Inadequate	4	< 7 hrs	80	No central obese	4	No Depression	0	No Anxiety	0	No Stress	No	No	10.3	146	70	4	1	2.55	1	Yes	No	Yes	No	Yes	No		1
603	72.899	1_Johor	SMK DATO` ALI HJ AHMAD	43	Male	Malay	Degree	Married	No	No	Low	164	No Sedentary	<2	<3	Inadequate	6	< 7 hrs	89	No central obese	2	No Depression	6	No Anxiety	6	No Stress	No	No	4.7	115	79	4.7	1.3	3.11	1	No	No	No	No	No	No	0	0
604	72.899	1_Johor	SMK DATO` ALI HJ AHMAD	32	Female	Chinese	Master and above	Married	No	Yes	Low	120	No Sedentary	<2	<3	Inadequate	6.5	< 7 hrs	76	No central obese	8	No Depression	10	Anxiety	14	Stress	No	Yes	4.3	102	63	5.1	0.4	2.82	2.1	No	No	No	No	No	No	0	0
605	72.899	1_Johor	SMK DATO` ALI HJ AHMAD	37	Female	Chinese	Degree	Single	Yes	No	Moderate	60	No Sedentary	<2	<3	Inadequate	7	7 hrs and above	93	Central obese	10	Depression	8	Anxiety	12	No Stress	No	No	4.5	127	76	4.8	0.9	2.79	1.6	No	No	No	No	No	No	0	0
606	72.899	1_Johor	SMK DATO` ALI HJ AHMAD	43	Female	Malay	Degree	Married	Yes	No	Low	211	No Sedentary	>=2	<3	Inadequate	4	< 7 hrs	85	Central obese	26	Depression	28	Anxiety	28	Stress	No	No	5.8	142	97	6.2	0.8	3.84	2	No	Yes	No	No	No	No	1	0
607	72.899	1_Johor	SMK DATO` ALI HJ AHMAD	37	Female	Malay	Degree	Married	No	No	Low	195	No Sedentary	<2	<3	Inadequate	5.5	< 7 hrs	65	No central obese	4	No Depression	14	Anxiety	10	No Stress	No	No	4	112	69	5.8	0.5	3.77	1.8	No	No	No	No	No	No	0	0
608	72.899	1_Johor	SMK DATO` ALI HJ AHMAD	47	Female	Malay	Master and above	Married	Yes	No	Moderate	90	No Sedentary	<2	<3	Inadequate	6.5	< 7 hrs	80	Central obese	6	No Depression	4	No Anxiety	12	No Stress	No	No	4.8	101	70	6.8	1.6	4.57	1.5	No	No	No	No	No	No	0	0
609	72.899	1_Johor	SMK DATO` ALI HJ AHMAD	41	Female	Malay	Degree	Married	Yes	Yes	High	540	No Sedentary	<2	<3	Inadequate	5	< 7 hrs	73	No central obese	6	No Depression	16	Anxiety	18	Stress	No	No	5.9	120	84	5.2	0.8	3.34	1.5	No	Yes	No	No	No	No	1	0
610	72.899	1_Johor	SMK DATO` ALI HJ AHMAD	26	Female	Malay	Degree	Single	No	No	High	780	sedentary	<2	<3	Inadequate	7.5	7 hrs and above	60	No central obese	0	No Depression	0	No Anxiety	2	No Stress	No	No	4.8	110	67	4.6	0.4	2.42	2	No	No	No	No	No	No	0	0
611	61.441	1_Johor	SMK DATO' BENTARA DALAM	28	Female	Malay	Degree	Single	No	No	Low	191	No Sedentary	<2	>=3	Inadequate	6	< 7 hrs	68	No central obese	8	No Depression	10	Anxiety	10	No Stress	No	No	4.6	125	85	5.4	1.5	3.32	1.4	No	No	No	No	No	No	0	0
612	61.441	1_Johor	SMK DATO' BENTARA DALAM	50	Male	Malay	Degree	Married	Yes	No	Moderate	178	No Sedentary	<2	<3	Inadequate	5	< 7 hrs	104.5	Central obese	0	No Depression	2	No Anxiety	4	No Stress	No	No	5	169	103	5.7	1.5	3.52	1.5	No	No	No	No	No	No	0	0
613	61.441	1_Johor	SMK DATO' BENTARA DALAM	33	Female	Malay	Degree	Single	Yes	No	Moderate	30	No Sedentary	<2	<3	Inadequate	8	7 hrs and above	71.8269	No central obese	2	No Depression	4	No Anxiety	10	No Stress	No	No	4.6	95	66.0769	4.5	0.5	2.37	1.9	No	No	No	No	No	No	0	0
614	61.441	1_Johor	SMK DATO' BENTARA DALAM	33	Female	Chinese	Degree	Single	Yes	No	Low	189	No Sedentary	<2	<3	Inadequate	5.5	< 7 hrs	79	No central obese	6	No Depression	16	Anxiety	10	No Stress	No	Yes	4.6	132	82	5.06731	0.6	1.93	1	No	No	No	No	No	No	0	0
615	61.441	1_Johor	SMK DATO' BENTARA DALAM	38	Female	Malay	Diploma and below	Married	Yes	No	Low	270	No Sedentary	<2	<3	Inadequate	5.5	< 7 hrs	79	No central obese	2	No Depression	6	No Anxiety	8	No Stress	No	No	6.4	142	76	5.7	1.2	3.56	1.6	No	Yes	No	No	No	No		1
616	61.441	1_Johor	SMK DATO' BENTARA DALAM	46	Female	Chinese	Degree	Single	Yes	No	High	210	No Sedentary	<2	<3	Inadequate	6.5	< 7 hrs	75	No central obese	4	No Depression	8	Anxiety	8	No Stress	No	No	4.7	115	73	4.3	0.6	2.33	1.7	No	No	No	No	No	No	0	0
617	61.441	1_Johor	SMK DATO' BENTARA DALAM	28	Female	Malay	Degree	Married	Yes	Yes	Moderate	162	No Sedentary	<2	<3	Inadequate	5.5	< 7 hrs	77	No central obese	4	No Depression	12	Anxiety	14	Stress	No	No	4.2	115	81	5	0.6	3.53	1.2	No	No	No	No	No	No	0	0
618	61.441	1_Johor	SMK DATO' BENTARA DALAM	29	Female	Malay	Degree	Single	Yes	No	Moderate	120	No Sedentary	<2	<3	Inadequate	7.5	7 hrs and above	89.4519	Central obese	16	Depression	14	Anxiety	16	Stress	No	No	5	146	83.6346	5.3	1.4	3.46	1.2	No	No	No	No	No	No	0	0
619	61.441	1_Johor	SMK DATO' BENTARA DALAM	29	Female	Malay	Diploma and below	Married	No	No	Low	216	No Sedentary	<2	<3	Inadequate	7.67788	7 hrs and above	79	No central obese	24	Depression	18	Anxiety	18	Stress	No	No	4.3	117	70	5.1	1.2	2.76	1.8	No	No	No	No	No	No	0	0
620	61.441	1_Johor	SMK DATO' BENTARA DALAM	25	Female	Malay	Degree	Married	No	No	High	206	No Sedentary	<2	<3	Inadequate	4.5	< 7 hrs	66	No central obese	6	No Depression	10	Anxiety	10	No Stress	No	No	4.2	115	68	5.7	0.8	3.14	2.2	No	No	No	No	No	No	0	0
621	61.441	1_Johor	SMK DATO' BENTARA DALAM	44	Female	Chinese	Degree	Married	No	No	Low	228	No Sedentary	>=2	>=3	Adequate	7	7 hrs and above	79	No central obese	2	No Depression	4	No Anxiety	6	No Stress	No	No	5	168	101	4.2	1.2	2.56	1.1	No	No	No	No	No	No	0	0
622	61.441	1_Johor	SMK DATO' BENTARA DALAM	50	Female	Malay	Degree	Married	No	No	High	300	No Sedentary	>=2	<3	Inadequate	5.5	< 7 hrs	77	No central obese	0	No Depression	2	No Anxiety	0	No Stress	No	No	5	127	66	6.7	1.1	4.6	1.6	No	No	No	No	No	No	0	0
623	61.441	1_Johor	SMK DATO' BENTARA DALAM	51	Female	Malay	Degree	Married	No	No	Low	155	No Sedentary	>=2	<3	Inadequate	5.5	< 7 hrs	71.5	No central obese	0	No Depression	0	No Anxiety	2	No Stress	No	No	4.5	166	90	4.6	0.5	2.87	1.5	No	No	No	No	Yes	No	0	0
624	61.441	1_Johor	SMK DATO' BENTARA DALAM	50	Female	Malay	Degree	Married	No	No	Low	173	No Sedentary	<2	<3	Inadequate	6.5	< 7 hrs	78.5	No central obese	0	No Depression	0	No Anxiety	0	No Stress	No	No	4	142	77	4.4	1	2.55	1.4	No	No	No	No	No	No	0	0
625	61.441	1_Johor	SMK DATO' BENTARA DALAM	29	Female	Malay	Degree	Married	No	No	Moderate	360	No Sedentary	<2	<3	Inadequate	6	< 7 hrs	72.5	No central obese	6	No Depression	2	No Anxiety	8	No Stress	No	No	4.1	105	62	4.6	0.6	2.53	1.8	No	No	No	No	No	No	0	0
626	61.441	1_Johor	SMK DATO' BENTARA DALAM	54	Male	Malay	Degree	Married	Yes	No	Low	10	No Sedentary	<2	<3	Inadequate	6.5	< 7 hrs	109	Central obese	0	No Depression	0	No Anxiety	4	No Stress	No	No	4.9	148	75	6	2.2	3.8	1.2	No	No	No	No	No	No	0	0
627	61.441	1_Johor	SMK DATO' BENTARA DALAM	40	Female	Chinese	Degree	Single	No	No	Low	180	No Sedentary	>=2	<3	Inadequate	7	7 hrs and above	73	No central obese	8	No Depression	6	No Anxiety	10	No Stress	No	No	4.6	107	67	4.5	0.9	2.59	1.5	No	No	No	No	No	No	0	0
628	61.441	1_Johor	SMK DATO' BENTARA DALAM	33	Female	Malay	Degree	Married	No	No	Moderate	173	No Sedentary	<2	<3	Inadequate	6	< 7 hrs	73	No central obese	2	No Depression	18	Anxiety	14	Stress	No	No	4.6	117	65	5	0.6	3.03	1.7	No	No	No	No	No	No	0	0
629	61.441	1_Johor	SMK DATO' BENTARA DALAM	40	Female	Malay	Degree	Married	No	No	Low	158	No Sedentary	<2	<3	Inadequate	6	< 7 hrs	76	No central obese	2	No Depression	4	No Anxiety	8	No Stress	No	No	5.2	106	70.0385	5.2	1	3.35	1.4	No	No	No	No	No	No	0	0
630	61.441	1_Johor	SMK DATO' BENTARA DALAM	50	Female	Chinese	Master and above	Married	No	No	Moderate	187	No Sedentary	<2	<3	Inadequate	5.5	< 7 hrs	82	Central obese	10	Depression	12	Anxiety	14	Stress	No	Yes	4.9	120	67	4.7	1	2.85	1.4	No	No	No	No	No	No	0	0
631	61.441	1_Johor	SMK DATO' BENTARA DALAM	27	Female	Malay	Degree	Married	Yes	No	High	720	sedentary	>=2	<3	Inadequate	6.5	< 7 hrs	68	No central obese	4	No Depression	6	No Anxiety	8	No Stress	No	No	4	94	67.1731	5.1	0.4	2.92	2	No	No	No	No	No	No	0	0
632	320.046	1_Johor	SMK TAMAN DESA JAYA	49	Female	Indian	Degree	Married	No	No	High	120	No Sedentary	<2	<3	Inadequate	7.5	7 hrs and above	90	Central obese	0	No Depression	4	No Anxiety	2	No Stress	No	No	4.9	120	77	5.4	1.1	3.5	1.4	No	No	No	No	No	No	0	0
633	320.046	1_Johor	SMK TAMAN DESA JAYA	39	Female	Malay	Degree	Married	No	No	High	213	No Sedentary	<2	>=3	Inadequate	6	< 7 hrs	76	No central obese	10	Depression	14	Anxiety	10	No Stress	No	No	4.8	98	61	5.6	0.8	3.64	1.6	No	No	No	No	No	No	0	0
634	320.046	1_Johor	SMK TAMAN DESA JAYA	29	Female	Malay	Degree	Single	Yes	No	Moderate	147	No Sedentary	<2	<3	Inadequate	5.5	< 7 hrs	68	No central obese	0	No Depression	6	No Anxiety	12	No Stress	No	No	4.5	105	62	4.4	0.4	2.82	1.4	No	No	No	No	No	No	0	0
635	320.046	1_Johor	SMK TAMAN DESA JAYA	28	Female	Malay	Degree	Single	Yes	No	Moderate	540	No Sedentary	<2	<3	Inadequate	5.14519	< 7 hrs	73	No central obese	2	No Depression	4	No Anxiety	8	No Stress	No	No	4.6	108	72	4.3	0.6	2.03	2	No	No	No	No	No	No	0	0
636	320.046	1_Johor	SMK TAMAN DESA JAYA	33	Female	Chinese	Degree	Married	No	Yes	High	60	No Sedentary	<2	<3	Inadequate	5.5	< 7 hrs	67	No central obese	28	Depression	26	Anxiety	30	Stress	No	Yes	4.6	110	76	4.5	0.6	2.63	1.6	No	No	No	No	No	No	0	0
638	320.046	1_Johor	SMK TAMAN DESA JAYA	29	Male	Malay	Degree	Married	No	No	Moderate	180	No Sedentary	<2	<3	Inadequate	6	< 7 hrs	104	Central obese	4	No Depression	2	No Anxiety	4	No Stress	Yes	No	4.9	134	85	5.8	1.6	3.87	1.2	No	No	No	No	No	Yes	0	0
639	320.046	1_Johor	SMK TAMAN DESA JAYA	30	Female	Malay	Degree	Married	No	No	High	420	No Sedentary	>=2	<3	Inadequate	5	< 7 hrs	69	No central obese	2	No Depression	3	No Anxiety	4	No Stress	No	No	4.9	113	70	4.88654	0.5	2.77	2.1	No	No	No	No	No	No	0	0
640	320.046	1_Johor	SMK TAMAN DESA JAYA	35	Female	Malay	Degree	Married	No	No	Moderate	30	No Sedentary	<2	<3	Inadequate	6.5	< 7 hrs	89	Central obese	4	No Depression	6	No Anxiety	12	No Stress	No	No	4.4	111	75	4	0.7	2.08	1.6	No	No	No	No	No	No	0	0
641	320.046	1_Johor	SMK TAMAN DESA JAYA	47	Male	Malay	Degree	Married	Yes	No	Low	204	No Sedentary	<2	>=3	Inadequate	6.5	< 7 hrs	100	Central obese	4	No Depression	6	No Anxiety	4	No Stress	No	No	6.1	156	102	6	1.75962	2.66	1.3	No	Yes	No	No	No	No		1
642	320.046	1_Johor	SMK TAMAN DESA JAYA	26	Female	Malay	Degree	Married	Yes	No	Low	180	No Sedentary	<2	<3	Inadequate	6	< 7 hrs	79	No central obese	16	Depression	24	Anxiety	22	Stress	No	No	4.3	113	70	5.8	0.7	4.08	1.4	No	No	No	No	No	No	0	0
643	320.046	1_Johor	SMK TAMAN DESA JAYA	25	Female	Malay	Degree	Married	Yes	No	Low	152	No Sedentary	<2	<3	Inadequate	6.5	< 7 hrs	73	No central obese	10	Depression	2	No Anxiety	12	No Stress	No	No	4.3	128	75	3.7	0.5	2.17	1.3	No	No	No	No	No	No	0	0
645	320.046	1_Johor	SMK TAMAN DESA JAYA	35	Male	Malay	Degree	Married	Yes	No	Moderate	212	No Sedentary	<2	<3	Inadequate	8	7 hrs and above	107	Central obese	2	No Depression	0	No Anxiety	10	No Stress	No	No	5.2	137	83	4.1	1.1	2.4	1.2	No	No	No	No	No	No	0	0
646	320.046	1_Johor	SMK TAMAN DESA JAYA	27	Female	Malay	Degree	Single	Yes	No	High	300	No Sedentary	<2	<3	Inadequate	8	7 hrs and above	65	No central obese	14	Depression	16	Anxiety	18	Stress	No	No	5.1	130	74	4.9	0.8	2.94	1.6	No	No	No	No	No	No	0	0
647	320.046	1_Johor	SMK TAMAN DESA JAYA	25	Female	Chinese	Degree	Single	Yes	No	Low	228	No Sedentary	<2	<3	Inadequate	7.58462	7 hrs and above	68	No central obese	14	Depression	16	Anxiety	20	Stress	No	No	4.6	116	77	5.3	0.9	3.39	1.5	No	No	No	No	No	No	0	0
649	320.046	1_Johor	SMK TAMAN DESA JAYA	29	Female	Malay	Degree	Married	No	No	Low	120	No Sedentary	<2	<3	Inadequate	5.5	< 7 hrs	82	Central obese	14	Depression	18	Anxiety	18	Stress	No	No	4	106	62	4.64231	0.4	1.62	1.2	No	No	No	No	No	No	0	0
651	320.046	1_Johor	SMK TAMAN DESA JAYA	45	Female	Malay	Degree	Married	Yes	No	Low	216	No Sedentary	<2	<3	Inadequate	8	7 hrs and above	71	No central obese	22	Depression	22	Anxiety	24	Stress	No	No	4.7	146	86	5.5	1.3	3.51	1.4	No	No	No	No	No	No	0	0
652	320.046	1_Johor	SMK TAMAN DESA JAYA	27	Female	Malay	Diploma and below	Single	No	No	Low	185	No Sedentary	>=2	<3	Inadequate	5.5	< 7 hrs	97	Central obese	14	Depression	14	Anxiety	16	Stress	No	No	5.3	115	73	4.9	0.6	3.03	1.6	No	No	No	No	No	No	0	0
653	320.046	1_Johor	SMK TAMAN DESA JAYA	34	Female	Malay	Degree	Married	Yes	Yes	Low	206	No Sedentary	<2	<3	Inadequate	8	7 hrs and above	87	Central obese	0	No Depression	0	No Anxiety	10	No Stress	No	No	4.6	106	64	4.7	2.6	1.72	1.8	No	No	No	No	No	No	0	0
654	320.046	1_Johor	SMK TAMAN DESA JAYA	27	Female	Other races	Degree	Married	Yes	No	Moderate	60	No Sedentary	<2	<3	Inadequate	6.38413	< 7 hrs	91	Central obese	0	No Depression	0	No Anxiety	6	No Stress	No	No	6.2	119	60	6.2	0.9	4.39	1.4	No	Yes	No	No	No	No		1
656	320.046	1_Johor	SMK TAMAN DESA JAYA	27	Female	Malay	Degree	Single	No	No	Low	210	No Sedentary	<2	<3	Inadequate	6	< 7 hrs	80	Central obese	10	Depression	12	Anxiety	14	Stress	No	No	5.6	106	62	3.9	0.7	2.38	1.2	No	Yes	No	No	No	No	1	0
657	320.046	1_Johor	SMK TAMAN DESA JAYA	41	Female	Chinese	Degree	Married	No	No	Low	191	No Sedentary	<2	<3	Inadequate	7	7 hrs and above	68	No central obese	8	No Depression	14	Anxiety	14	Stress	No	No	4.8	102	60	4.2	0.6	2.43	1.5	No	No	No	No	No	No	0	0
658	320.046	1_Johor	SMK TAMAN DESA JAYA	53	Female	Malay	Degree	Married	Yes	No	Moderate	208	No Sedentary	<2	<3	Inadequate	6	< 7 hrs	96	Central obese	2	No Depression	6	No Anxiety	0	No Stress	No	No	6	131	79	5.4	2.8	2.73	1.4	No	Yes	No	No	Yes	Yes	1	0
659	360.051	1_Johor	SMK PASIR GUDANG 2	38	Female	Chinese	Degree	Married	Yes	No	Moderate	120	No Sedentary	<2	<3	Inadequate	7.5	7 hrs and above	67	No central obese	12	Depression	10	Anxiety	22	Stress	No	No	4.5	111	67	4.71731	0.5	1.88	1.39	No	No	No	No	No	No	0	0
660	360.051	1_Johor	SMK PASIR GUDANG 2	27	Female	Malay	Degree	Single	Yes	No	Low	150	No Sedentary	<2	>=3	Inadequate	6.5	< 7 hrs	88	Central obese	16	Depression	16	Anxiety	18	Stress	No	No	5.1	124	85	4.9	1.6	2.83	1.34	No	No	No	No	No	No	0	0
661	360.051	1_Johor	SMK PASIR GUDANG 2	30	Female	Malay	Degree	Single	No	No	Low	191	No Sedentary	<2	<3	Inadequate	5	< 7 hrs	67	No central obese	14	Depression	22	Anxiety	20	Stress	No	No	5	103	69	3.7	0.6	2.04	1.39	No	No	No	No	No	No	0	0
662	360.051	1_Johor	SMK PASIR GUDANG 2	29	Female	Malay	Degree	Married	Yes	No	High	240	No Sedentary	<2	<3	Inadequate	6.5	< 7 hrs	62	No central obese	8	No Depression	6	No Anxiety	12	No Stress	No	No	4.5	111	70	5.3	0.6	2.98	2.05	No	No	No	No	No	No	0	0
663	360.051	1_Johor	SMK PASIR GUDANG 2	37	Female	Malay	Degree	Married	Yes	No	High	30	No Sedentary	<2	<3	Inadequate	6.5	< 7 hrs	73	No central obese	0	No Depression	2	No Anxiety	4	No Stress	No	No	5	123	62	6.2	1.4	2.94	1.54827	No	No	No	No	No	No	0	0
664	360.051	1_Johor	SMK PASIR GUDANG 2	47	Female	Malay	Master and above	Married	No	No	Moderate	125	No Sedentary	<2	<3	Inadequate	6.5	< 7 hrs	90	Central obese	2	No Depression	4	No Anxiety	4	No Stress	No	No	5.2	122	73	5.8	1.4	3.58	1.58	No	No	No	No	No	Yes	0	0
665	360.051	1_Johor	SMK PASIR GUDANG 2	34	Female	Malay	Degree	Married	No	No	Moderate	158	No Sedentary	<2	<3	Inadequate	6.5	< 7 hrs	81	Central obese	0	No Depression	4	No Anxiety	0	No Stress	No	No	5	113	69	5.8	1.1	3.86	1.44	No	No	No	No	No	No	0	0
666	360.051	1_Johor	SMK PASIR GUDANG 2	33	Male	Malay	Degree	Married	Yes	No	Low	148	No Sedentary	<2	<3	Inadequate	8.5	7 hrs and above	65	No central obese	0	No Depression	14	Anxiety	8	No Stress	No	No	4.5	116	66	4.5	0.5	2.48	1.79	No	No	No	No	No	No	0	0
667	360.051	1_Johor	SMK PASIR GUDANG 2	33	Female	Malay	Diploma and below	Married	No	No	Moderate	158	No Sedentary	<2	<3	Inadequate	7.5	7 hrs and above	86	Central obese	0	No Depression	4	No Anxiety	0	No Stress	No	No	5.1	117	72	4.9	1.5	3.06	1.16	No	No	No	No	No	No	0	0
668	360.051	1_Johor	SMK PASIR GUDANG 2	41	Female	Indian	Master and above	Married	No	No	Low	150	No Sedentary	>=2	<3	Inadequate	5	< 7 hrs	84	Central obese	0	No Depression	0	No Anxiety	0	No Stress	No	No	4.9	138	80	4.4	0.9	2.99	1	No	No	No	No	No	No	0	0
669	360.051	1_Johor	SMK PASIR GUDANG 2	41	Female	Malay	Degree	Married	Yes	No	Low	169	No Sedentary	<2	<3	Inadequate	5.5	< 7 hrs	68	No central obese	4	No Depression	6	No Anxiety	2	No Stress	No	No	4.9	105	66	5.5	0.9	3.4	1.69	No	No	No	No	No	No	0	0
670	360.051	1_Johor	SMK PASIR GUDANG 2	42	Female	Malay	Degree	Married	Yes	Yes	Low	30	No Sedentary	<2	<3	Inadequate	6	< 7 hrs	92	Central obese	2	No Depression	6	No Anxiety	6	No Stress	No	No	4.9	150	95	5.8	1	3.23	2.12	No	No	No	No	No	No	0	0
671	360.051	1_Johor	SMK PASIR GUDANG 2	33	Male	Malay	Master and above	Married	No	No	Moderate	30	No Sedentary	<2	<3	Inadequate	5	< 7 hrs	89	No central obese	8	No Depression	16	Anxiety	14	Stress	No	No	5	128	92	5.9	1.5	4.11	1.11	No	No	No	No	Yes	No	0	0
672	360.051	1_Johor	SMK PASIR GUDANG 2	34	Female	Malay	Degree	Married	Yes	No	Moderate	60	No Sedentary	<2	<3	Inadequate	4.84135	< 7 hrs	78	No central obese	4	No Depression	10	Anxiety	12	No Stress	No	No	4.9	139	89	5.5	0.9	3.4	1.69	No	No	No	No	No	No	0	0
673	360.051	1_Johor	SMK PASIR GUDANG 2	29	Female	Malay	Degree	Married	No	No	High	180	No Sedentary	<2	<3	Inadequate	7	7 hrs and above	72	No central obese	16	Depression	24	Anxiety	24	Stress	No	No	4.5	95	63	4.3	0.7	2.88	1.1	No	No	No	No	No	No	0	0
674	360.051	1_Johor	SMK PASIR GUDANG 2	30	Female	Malay	Degree	Married	Yes	Yes	Moderate	157	No Sedentary	<2	<3	Inadequate	8	7 hrs and above	73	No central obese	0	No Depression	0	No Anxiety	0	No Stress	No	No	5	112	71	6	1	3.66	1.89	No	No	No	No	No	No	0	0
675	360.051	1_Johor	SMK PASIR GUDANG 2	45	Female	Malay	Degree	Married	No	No	Low	120	No Sedentary	<2	<3	Inadequate	5	< 7 hrs	70	No central obese	4	No Depression	6	No Anxiety	2	No Stress	No	No	4.5	127	62	4.6	1.2	2.32	1.74	No	No	No	No	No	No	0	0
676	360.051	1_Johor	SMK PASIR GUDANG 2	37	Female	Malay	Degree	Married	No	No	High	164	No Sedentary	<2	<3	Inadequate	6.5	< 7 hrs	69	No central obese	4	No Depression	8	Anxiety	12	No Stress	No	No	4.7	107	70	3.7	0.4	1.93	1.59	No	No	No	No	No	No	0	0
677	360.051	1_Johor	SMK PASIR GUDANG 2	36	Female	Malay	Degree	Married	No	No	Low	120	No Sedentary	<2	<3	Inadequate	6.5	< 7 hrs	75	No central obese	14	Depression	16	Anxiety	16	Stress	No	No	4.4	104	65	4.8	0.7	2.91	1.57	No	No	No	No	No	No	0	0
678	360.051	1_Johor	SMK PASIR GUDANG 2	39	Female	Malay	Degree	Single	No	No	Moderate	206	No Sedentary	<2	<3	Inadequate	6	< 7 hrs	70	No central obese	4	No Depression	6	No Anxiety	12	No Stress	No	No	4.5	103	63	5.9	0.9	3.75	1.74	No	No	No	No	No	No	0	0
679	1178.07	1_Johor	SMK MAJIDI BARU 2	41	Female	Malay	Degree	Married	Yes	No	Low	900	sedentary	<2	<3	Inadequate	6	< 7 hrs	94	Central obese	4	No Depression	10	Anxiety	12	No Stress	No	No	5.6	138	82	7.5	1.1	5.38	1.65	No	Yes	No	No	No	No	1	0
680	1178.07	1_Johor	SMK MAJIDI BARU 2	39	Male	Malay	Degree	Married	No	No	Low	198	No Sedentary	<2	<3	Inadequate	5	< 7 hrs	73	No central obese	10	Depression	6	No Anxiety	12	No Stress	Yes	No	5	114	66	5	0.9	3.35	1.28	No	No	No	No	No	No	0	0
681	1178.07	1_Johor	SMK MAJIDI BARU 2	47	Male	Malay	Degree	Married	Yes	No	High	360	No Sedentary	<2	<3	Inadequate	5	< 7 hrs	106	Central obese	0	No Depression	2	No Anxiety	4	No Stress	No	No	4.9	110	70	5.3	1.2	2.99	1.74	No	No	No	No	No	Yes	0	0
682	1178.07	1_Johor	SMK MAJIDI BARU 2	48	Female	Malay	Degree	Divorced/Widowed	Yes	No	Moderate	120	No Sedentary	<2	<3	Inadequate	6	< 7 hrs	80	Central obese	6	No Depression	4	No Anxiety	6	No Stress	No	No	5.1	131	78	7.2	1	5.36	1.35	No	No	No	No	No	No	0	0
683	1178.07	1_Johor	SMK MAJIDI BARU 2	46	Female	Malay	Degree	Married	No	No	Low	125	No Sedentary	<2	<3	Inadequate	6	< 7 hrs	78	No central obese	8	No Depression	8	Anxiety	12	No Stress	No	No	5.2	116	74	5.2	1	3.47	1.29	No	No	No	No	No	No	0	0
685	130.748	1_Johor	SMK DATO ONN	47	Female	Malay	Degree	Married	Yes	No	Low	60	No Sedentary	<2	<3	Inadequate	5.5	< 7 hrs	81.5	Central obese	0	No Depression	2	No Anxiety	2	No Stress	No	No	4.7	145	83	5.3	2.6	2.92	1.2	No	No	No	No	No	No	0	0
687	130.748	1_Johor	SMK DATO ONN	47	Male	Malay	Diploma and below	Married	Yes	No	Low	240	No Sedentary	<2	<3	Inadequate	5	< 7 hrs	103.3	Central obese	6	No Depression	10	Anxiety	2	No Stress	No	No	5.1	151	94	3.9	1.9	2.24	0.8	No	No	No	No	No	No	0	0
688	130.748	1_Johor	SMK DATO ONN	49	Male	Malay	Degree	Married	No	No	High	60	No Sedentary	<2	<3	Inadequate	6	< 7 hrs	88.1	No central obese	2	No Depression	6	No Anxiety	10	No Stress	No	No	4.9	139	91	6.6	1.1	4.2	1.9	No	No	No	No	No	No	0	0
690	130.748	1_Johor	SMK DATO ONN	38	Female	Malay	Degree	Married	No	No	Moderate	160	No Sedentary	<2	<3	Inadequate	5	< 7 hrs	78.1	No central obese	2	No Depression	0	No Anxiety	8	No Stress	No	No	4.8	94	59	4.2	0.9	2.39	1.4	No	No	No	No	No	No	0	0
704	130.748	1_Johor	SMK DATO ONN	49	Female	Malay	Degree	Married	No	No	Low	180	No Sedentary	<2	<3	Inadequate	6.11106	< 7 hrs	78	No central obese	6	No Depression	10	Anxiety	10	No Stress	No	No	4.9	173	87	5.6	1.5	2.92	2	No	No	No	No	No	No	0	0
709	130.748	1_Johor	SMK DATO ONN	29	Female	Malay	Degree	Married	Yes	No	High	184	No Sedentary	<2	<3	Inadequate	5.5	< 7 hrs	85	Central obese	8	No Depression	16	Anxiety	18	Stress	No	No	4.6	131	84	5.9	0.9	3.39	2.1	No	No	No	No	No	No	0	0
710	130.748	1_Johor	SMK DATO ONN	39	Female	Malay	Master and above	Married	No	No	Low	150	No Sedentary	<2	<3	Inadequate	6	< 7 hrs	76	No central obese	12	Depression	12	Anxiety	18	Stress	No	No	4.9	94	67	3.8	0.8	2.14	1.3	No	No	No	No	No	No	0	0
714	130.748	1_Johor	SMK DATO ONN	40	Female	Malay	Degree	Married	Yes	No	High	174	No Sedentary	<2	<3	Inadequate	6	< 7 hrs	93.5	Central obese	0	No Depression	2	No Anxiety	0	No Stress	No	No	4.6	119	75	4.6	1.8	2.78	1	No	No	No	No	No	No	0	0
717	149.426	1_Johor	SMK DATO SULAIMAN	52	Male	Malay	Diploma and below	Married	Yes	No	Moderate	350	No Sedentary	<2	<3	Inadequate	6	< 7 hrs	84	No central obese	4	No Depression	4	No Anxiety	8	No Stress	No	No	8.3	134	87	5.9	1.9	3.64	1.4	No	Yes	No	No	Yes	Yes		1
718	149.426	1_Johor	SMK DATO SULAIMAN	51	Female	Malay	Diploma and below	Married	No	No	Low	181	No Sedentary	<2	<3	Inadequate	6	< 7 hrs	85	Central obese	0	No Depression	2	No Anxiety	0	No Stress	No	No	6.2	162	103	7.8	2	5.39	1.5	No	Yes	No	No	Yes	No		1
719	149.426	1_Johor	SMK DATO SULAIMAN	51	Female	Malay	Diploma and below	Married	No	No	Low	60	No Sedentary	<2	<3	Inadequate	6	< 7 hrs	82	Central obese	8	No Depression	12	Anxiety	8	No Stress	No	No	4.3	156	91	6.5	2.4	3.71	1.7	No	No	No	No	No	Yes	0	0
720	149.426	1_Johor	SMK DATO SULAIMAN	38	Female	Malay	Degree	Married	Yes	No	Moderate	90	No Sedentary	>=2	<3	Inadequate	6	< 7 hrs	82	Central obese	6	No Depression	4	No Anxiety	6	No Stress	No	No	5.5	132	82	6.2	2.6	3.62	1.4	No	No	No	No	No	No	0	0
721	149.426	1_Johor	SMK DATO SULAIMAN	42	Female	Malay	Degree	Married	Yes	No	High	180	No Sedentary	<2	<3	Inadequate	6.5	< 7 hrs	104.2	Central obese	2	No Depression	4	No Anxiety	2	No Stress	No	No	4	140	77	4.9	2	2.79	1.2	No	No	No	No	No	No	0	0
722	149.426	1_Johor	SMK DATO SULAIMAN	46	Female	Malay	Degree	Married	No	No	High	30	No Sedentary	<2	<3	Inadequate	6	< 7 hrs	72	No central obese	2	No Depression	4	No Anxiety	4	No Stress	No	No	4.9	130	79	7.1	1.1	4.9	1.7	No	No	No	No	No	No	0	0
723	149.426	1_Johor	SMK DATO SULAIMAN	49	Female	Malay	Degree	Single	No	No	High	120	No Sedentary	>=2	<3	Inadequate	5.5	< 7 hrs	78.7	No central obese	4	No Depression	6	No Anxiety	6	No Stress	No	No	4.5	126	82	4.7	0.8	2.74	1.6	No	No	No	No	No	No	0	0
724	149.426	1_Johor	SMK DATO SULAIMAN	43	Female	Malay	Degree	Married	Yes	Yes	Low	166	No Sedentary	>=2	<3	Inadequate	5.5	< 7 hrs	79	No central obese	12	Depression	12	Anxiety	18	Stress	No	No	8	137	95	4.5	1.22692	2.935	1.7	Yes	No	Yes	Yes	No	No		1
725	149.426	1_Johor	SMK DATO SULAIMAN	48	Male	Malay	Degree	Married	No	No	Moderate	120	No Sedentary	<2	<3	Inadequate	5.94135	< 7 hrs	84	No central obese	30	Depression	36	Anxiety	32	Stress	No	No	5.4	139	93	6.7	1.89615	3.96	1.1	No	No	No	No	No	No	0	0
726	149.426	1_Johor	SMK DATO SULAIMAN	53	Male	Malay	Degree	Married	No	No	High	300	No Sedentary	<2	>=3	Inadequate	6	< 7 hrs	87	No central obese	2	No Depression	12	Anxiety	14	Stress	No	No	4.2	154	91	6.1	1.4	3.86	1.6	No	No	No	No	No	Yes	0	0
727	149.426	1_Johor	SMK DATO SULAIMAN	38	Female	Malay	Master and above	Married	Yes	No	Low	168	No Sedentary	<2	<3	Inadequate	5.5	< 7 hrs	93	Central obese	10	Depression	10	Anxiety	10	No Stress	No	No	4.1	132	83	5.9	2.6	3.22	1.5	No	No	No	No	No	No	0	0
728	149.426	1_Johor	SMK DATO SULAIMAN	53	Female	Malay	Degree	Married	No	No	Low	193	No Sedentary	<2	<3	Inadequate	5.5	< 7 hrs	85	Central obese	0	No Depression	0	No Anxiety	0	No Stress	No	No	4.8	151.154	110	4.7	0.7	3.08	1.3	No	No	No	No	Yes	No	0	0
729	149.426	1_Johor	SMK DATO SULAIMAN	34	Female	Malay	Degree	Married	Yes	No	Moderate	420	No Sedentary	<2	<3	Inadequate	6	< 7 hrs	66	No central obese	0	No Depression	4	No Anxiety	2	No Stress	No	No	4.6	144	86	5.5	1.2	3.16	1.8	No	No	No	No	No	No	0	0
730	149.426	1_Johor	SMK DATO SULAIMAN	40	Male	Malay	Degree	Married	Yes	No	High	240	No Sedentary	<2	<3	Inadequate	5	< 7 hrs	101	Central obese	8	No Depression	14	Anxiety	16	Stress	Yes	No	5.4	143	89	5.4	1	3.85	1.1	No	No	No	No	No	No	0	0
731	149.426	1_Johor	SMK DATO SULAIMAN	29	Male	Malay	Degree	Married	Yes	No	High	120	No Sedentary	>=2	<3	Inadequate	6.5	< 7 hrs	86	No central obese	4	No Depression	2	No Anxiety	4	No Stress	No	No	4.3	138	86	5.4	2.1	3.35	1.1	No	No	No	No	No	No	0	0
732	149.426	1_Johor	SMK DATO SULAIMAN	37	Female	Malay	Degree	Married	Yes	No	Moderate	90	No Sedentary	<2	<3	Inadequate	5.5	< 7 hrs	68	No central obese	0	No Depression	8	Anxiety	6	No Stress	No	No	4.6	130	82	5.28654	0.9	1.69	1.4	No	No	No	No	No	No	0	0
733	149.426	1_Johor	SMK DATO SULAIMAN	27	Female	Malay	Degree	Single	Yes	No	Moderate	300	No Sedentary	<2	<3	Inadequate	7.5	7 hrs and above	95.5	Central obese	4	No Depression	12	Anxiety	12	No Stress	No	No	4.9	130	77	4.6	1.1	3	1.1	No	No	No	No	No	No	0	0
734	149.426	1_Johor	SMK DATO SULAIMAN	40	Female	Malay	Degree	Married	No	No	Low	60	No Sedentary	<2	<3	Inadequate	7.5	7 hrs and above	73	No central obese	0	No Depression	0	No Anxiety	0	No Stress	No	No	4.2	122	101	6.1	1.2	4.06	1.5	No	No	No	No	No	No	0	0
735	149.426	1_Johor	SMK DATO SULAIMAN	47	Male	Malay	Master and above	Married	No	No	High	300	No Sedentary	<2	<3	Inadequate	5	< 7 hrs	91.2	Central obese	0	No Depression	2	No Anxiety	4	No Stress	No	No	5	121	76	5.7	1	3.95	1.3	No	No	No	No	No	No	0	0
736	149.426	1_Johor	SMK DATO SULAIMAN	36	Female	Malay	Degree	Married	Yes	No	Moderate	120	No Sedentary	>=2	<3	Inadequate	6	< 7 hrs	69	No central obese	2	No Depression	12	Anxiety	12	No Stress	No	No	5.19423	142	98	5.8	1	3.95	1.4	No	No	No	No	No	No	0	0
737	149.426	1_Johor	SMK DATO SULAIMAN	48	Female	Malay	Degree	Married	No	No	Moderate	450	No Sedentary	<2	<3	Inadequate	5	< 7 hrs	70	No central obese	2	No Depression	0	No Anxiety	4	No Stress	No	No	4.5	116	74	6.4	1.2	4.56	1.3	No	No	No	No	No	Yes	0	0
738	149.426	1_Johor	SMK DATO SULAIMAN	51	Female	Malay	Degree	Married	Yes	Yes	Moderate	60	No Sedentary	<2	<3	Inadequate	6.5	< 7 hrs	83	Central obese	14	Depression	12	Anxiety	18	Stress	No	No	4.3	123	83	6	0.8	3.24	1.47827	No	No	No	No	No	No	0	0
739	149.426	1_Johor	SMK DATO SULAIMAN	45	Female	Malay	Degree	Married	No	No	Moderate	360	No Sedentary	<2	>=3	Inadequate	8.5	7 hrs and above	76	No central obese	0	No Depression	0	No Anxiety	6	No Stress	No	No	4.2	125	86	5.8	2.3	3.26	1.5	No	No	No	No	No	No	0	0
740	149.426	1_Johor	SMK DATO SULAIMAN	45	Male	Malay	Degree	Married	No	No	High	65	No Sedentary	<2	>=3	Inadequate	5.84615	< 7 hrs	88	No central obese	2	No Depression	4	No Anxiety	4	No Stress	No	No	4.8	141	85	7.2	1.1	4.9	1.8	No	No	No	No	No	No	0	0
741	149.426	1_Johor	SMK DATO SULAIMAN	49	Male	Malay	Degree	Married	No	No	Moderate	210	No Sedentary	<2	<3	Inadequate	5.5	< 7 hrs	80	No central obese	14	Depression	16	Anxiety	16	Stress	No	No	4.9	118	72	5.8	1	3.75	1.6	No	No	No	No	No	No	0	0
742	149.426	1_Johor	SMK DATO SULAIMAN	44	Female	Malay	Degree	Married	Yes	No	Moderate	300	No Sedentary	<2	<3	Inadequate	5.5	< 7 hrs	76	No central obese	2	No Depression	2	No Anxiety	10	No Stress	No	No	4.2	131	78	4.8	1.7	2.93	1.1	No	No	No	No	No	No	0	0
743	71.992	1_Johor	SMK BANDAR EASTER	44	Female	Malay	Degree	Married	Yes	No	High	60	No Sedentary	<2	<3	Inadequate	6.5	< 7 hrs	95	Central obese	16	Depression	16	Anxiety	16	Stress	No	No	4.5	116	81	7.5	1.3	5.42	1.49	No	No	No	No	No	Yes	0	0
744	71.992	1_Johor	SMK BANDAR EASTER	46	Female	Malay	Degree	Married	No	No	Moderate	189	No Sedentary	<2	<3	Inadequate	5.5	< 7 hrs	77	No central obese	2	No Depression	2	No Anxiety	6	No Stress	No	No	4.7	129	69	6.1	1.1	3.81	1.79	No	No	No	No	No	No	0	0
745	71.992	1_Johor	SMK BANDAR EASTER	38	Male	Malay	Degree	Married	No	No	Moderate	120	No Sedentary	<2	<3	Inadequate	6.5	< 7 hrs	107	Central obese	12	Depression	14	Anxiety	14	Stress	No	No	5.7	141	77	6.9	2.7	4.33	1.34	No	Yes	No	No	No	No	1	0
746	71.992	1_Johor	SMK BANDAR EASTER	49	Male	Malay	Degree	Married	No	No	Low	120	No Sedentary	<2	<3	Inadequate	5	< 7 hrs	89	No central obese	0	No Depression	4	No Anxiety	2	No Stress	No	No	4.8	144	78	5.6	1	3.88	1.27	No	No	No	No	Yes	No	0	0
747	71.992	1_Johor	SMK BANDAR EASTER	34	Female	Malay	Degree	Married	No	No	Moderate	30	No Sedentary	<2	<3	Inadequate	6	< 7 hrs	82	Central obese	2	No Depression	6	No Anxiety	4	No Stress	No	No	5	111	61	7.2	1.1	4.84	1.86	No	No	No	No	No	No	0	0
748	71.992	1_Johor	SMK BANDAR EASTER	44	Female	Malay	Degree	Married	No	Yes	Low	120	No Sedentary	<2	<3	Inadequate	5.5	< 7 hrs	82.5	Central obese	0	No Depression	8	Anxiety	2	No Stress	No	No	5.7	117	62	6.4	0.9	4.12	1.87	No	Yes	No	No	No	No	1	0
749	71.992	1_Johor	SMK BANDAR EASTER	34	Female	Malay	Degree	Married	No	No	Moderate	120	No Sedentary	<2	<3	Inadequate	7.5	7 hrs and above	67	No central obese	4	No Depression	6	No Anxiety	8	No Stress	No	No	4.8	107	66	5.5	0.9	3.2	1.89	No	No	No	No	No	No	0	0
750	71.992	1_Johor	SMK BANDAR EASTER	31	Female	Malay	Degree	Married	No	No	Low	240	No Sedentary	<2	<3	Inadequate	7	7 hrs and above	75	No central obese	12	Depression	16	Anxiety	16	Stress	No	No	4.9	107	71	4.9	0.4	3.12	1.6	No	No	No	No	No	No	0	0
751	71.992	1_Johor	SMK BANDAR EASTER	46	Male	Malay	Degree	Married	No	No	High	120	No Sedentary	<2	<3	Inadequate	5	< 7 hrs	85	No central obese	0	No Depression	4	No Anxiety	2	No Stress	No	No	5.3	120	72	6.4	1.5	4.29	1.43	No	No	No	No	No	No	0	0
752	71.992	1_Johor	SMK BANDAR EASTER	39	Female	Malay	Degree	Married	Yes	Yes	Low	10	No Sedentary	<2	<3	Inadequate	5	< 7 hrs	66	No central obese	12	Depression	14	Anxiety	14	Stress	No	No	4.8	112	67	4.8	0.5	2.71	1.86	No	No	No	No	No	No	0	0
753	71.992	1_Johor	SMK BANDAR EASTER	56	Female	Malay	Degree	Married	Yes	No	Low	200	No Sedentary	<2	<3	Inadequate	7	7 hrs and above	90	Central obese	0	No Depression	4	No Anxiety	8	No Stress	No	No	9.3	141	89	5.4	1.7	3.42	1.21	Yes	No	Yes	Yes	Yes	Yes		1
754	71.992	1_Johor	SMK BANDAR EASTER	41	Male	Malay	Degree	Married	No	No	Low	182	No Sedentary	<2	<3	Inadequate	6	< 7 hrs	83	No central obese	8	No Depression	8	Anxiety	10	No Stress	No	No	5	138	91	5.7	1.2	3.86	1.3	No	No	No	No	No	No	0	0
755	71.992	1_Johor	SMK BANDAR EASTER	28	Female	Malay	Degree	Married	No	No	Moderate	40	No Sedentary	<2	<3	Inadequate	8	7 hrs and above	62.5	No central obese	4	No Depression	4	No Anxiety	6	No Stress	No	No	4.7	103	66	7	0.9	4.49	2.1	No	No	No	No	No	No	0	0
756	71.992	1_Johor	SMK BANDAR EASTER	27	Male	Malay	Degree	Single	No	No	Low	218	No Sedentary	<2	<3	Inadequate	6.32788	< 7 hrs	95	Central obese	12	Depression	4	No Anxiety	18	Stress	No	No	5.2	134	86	5.4	1.1	3.57	1.33	No	No	No	No	No	No	0	0
757	71.992	1_Johor	SMK BANDAR EASTER	35	Female	Malay	Master and above	Married	No	No	Low	169	No Sedentary	>=2	<3	Inadequate	6	< 7 hrs	83	Central obese	0	No Depression	2	No Anxiety	4	No Stress	No	No	5.3	123	67	4.4	1.36154	2.82019	0.79	No	No	No	No	No	No	0	0
758	71.992	1_Johor	SMK BANDAR EASTER	29	Female	Malay	Degree	Single	Yes	No	Low	90	No Sedentary	<2	<3	Inadequate	7	7 hrs and above	87.5269	Central obese	6	No Depression	10	Anxiety	14	Stress	No	No	5.8	145	98	5.7	1.9	3.32	1.52	No	Yes	No	No	No	No	1	0
759	71.992	1_Johor	SMK BANDAR EASTER	29	Male	Malay	Degree	Married	Yes	No	Low	220	No Sedentary	<2	<3	Inadequate	6	< 7 hrs	81	No central obese	0	No Depression	6	No Anxiety	4	No Stress	Yes	No	4.8	130	71	5.2	1.5	3.43	1.09	No	No	No	No	No	No	0	0
760	71.992	1_Johor	SMK BANDAR EASTER	49	Male	Chinese	Degree	Married	No	No	Moderate	120	No Sedentary	<2	<3	Inadequate	5.5	< 7 hrs	95	Central obese	2	No Depression	0	No Anxiety	2	No Stress	No	No	5.5	123	86	4.7	1.6	2.69	1.28	No	No	No	No	No	No	0	0
761	71.992	1_Johor	SMK BANDAR EASTER	39	Female	Malay	Degree	Married	Yes	No	Moderate	189	No Sedentary	<2	<3	Inadequate	7	7 hrs and above	74	No central obese	4	No Depression	4	No Anxiety	6	No Stress	No	No	5.2	113	66	5.7	1.4	3.78	1.28	No	No	No	No	No	No	0	0
762	71.992	1_Johor	SMK BANDAR EASTER	43	Female	Malay	Degree	Married	Yes	No	Moderate	120	No Sedentary	>=2	<3	Inadequate	6.5	< 7 hrs	66.5	No central obese	10	Depression	16	Anxiety	18	Stress	No	No	4.6	125	76	4.1	0.7	2.05	1.73	No	No	No	No	No	No	0	0
763	284.167	1_Johor	SMK TENANG STESEN	42	Male	Malay	Degree	Married	No	No	Low	200	No Sedentary	<2	<3	Inadequate	5.5	< 7 hrs	105	Central obese	10	Depression	14	Anxiety	14	Stress	No	No	7.1	140	95	5.2	1.6	3.17	1.3	No	Yes	No	No	No	No		1
764	284.167	1_Johor	SMK TENANG STESEN	38	Male	Malay	Degree	Married	Yes	No	Low	163	No Sedentary	<2	>=3	Inadequate	7	7 hrs and above	97	Central obese	2	No Depression	8	Anxiety	2	No Stress	No	No	4.4	131	91	5.5	0.8	3.64	1.5	No	No	No	No	No	No	0	0
765	284.167	1_Johor	SMK TENANG STESEN	38	Male	Malay	Degree	Married	Yes	No	Low	198	No Sedentary	<2	<3	Inadequate	5.5	< 7 hrs	103	Central obese	2	No Depression	8	Anxiety	6	No Stress	No	No	9.8	135	79	5.3	1	3.95	0.9	No	Yes	No	No	No	Yes		1
768	284.167	1_Johor	SMK TENANG STESEN	38	Male	Malay	Degree	Married	Yes	No	Low	212	No Sedentary	<2	<3	Inadequate	5.5	< 7 hrs	103	Central obese	12	Depression	6	No Anxiety	14	Stress	No	No	7.2	162	111	5.9	2.2	3.6	1.3	No	Yes	No	No	No	No		1
769	284.167	1_Johor	SMK TENANG STESEN	52	Female	Malay	Degree	Married	Yes	No	Moderate	480	No Sedentary	<2	<3	Inadequate	5	< 7 hrs	83	Central obese	6	No Depression	4	No Anxiety	10	No Stress	No	No	6.4	136	88	6.4	1.4	3.86	1.9	No	Yes	No	No	No	Yes		1
771	170.909	1_Johor	SMK ST ANDREW	32	Male	Malay	Degree	Married	No	No	High	45	No Sedentary	>=2	<3	Inadequate	7.5	7 hrs and above	94.5	Central obese	6	No Depression	2	No Anxiety	12	No Stress	No	No	5.4	158	110	5.8	1.5	3.85	1.23	No	No	No	No	No	No	0	0
772	170.909	1_Johor	SMK ST ANDREW	36	Male	Chinese	Degree	Single	Yes	No	Low	210	No Sedentary	<2	<3	Inadequate	6	< 7 hrs	79	No central obese	6	No Depression	4	No Anxiety	14	Stress	No	No	5.1	146	88	4.9	1	3.31	1.17	No	No	No	No	No	No	0	0
773	170.909	1_Johor	SMK ST ANDREW	48	Male	Malay	Degree	Married	Yes	No	Low	360	No Sedentary	>=2	<3	Inadequate	5.5	< 7 hrs	93	Central obese	6	No Depression	12	Anxiety	14	Stress	No	No	4.5	169	105	6.7	1.3	4.32	1.75	No	No	No	No	No	No	0	0
774	170.909	1_Johor	SMK ST ANDREW	32	Male	Malay	Degree	Married	No	No	Low	229	No Sedentary	<2	<3	Inadequate	8	7 hrs and above	66	No central obese	0	No Depression	0	No Anxiety	2	No Stress	Yes	No	4.7	123	80	4.8	0.6	3.47	1	No	No	No	No	No	No	0	0
775	170.909	1_Johor	SMK ST ANDREW	54	Male	Malay	Degree	Married	Yes	No	Moderate	212	No Sedentary	<2	<3	Inadequate	7.5	7 hrs and above	76	No central obese	2	No Depression	6	No Anxiety	8	No Stress	No	No	4.6	123	80	4.8	1.4	3.04	1.17	No	No	No	No	No	No	0	0
776	170.909	1_Johor	SMK ST ANDREW	48	Female	Chinese	Degree	Married	No	No	High	180	No Sedentary	>=2	<3	Inadequate	7.5	7 hrs and above	64	No central obese	16	Depression	14	Anxiety	22	Stress	No	Yes	4.8	121	73	6.7	0.8	4.45	1.9	No	No	No	No	No	No	0	0
777	170.909	1_Johor	SMK ST ANDREW	58	Male	Malay	Degree	Married	Yes	No	Moderate	360	No Sedentary	<2	<3	Inadequate	8	7 hrs and above	99.5	Central obese	10	Depression	10	Anxiety	10	No Stress	No	No	5.3	148	82	6.6	1.2	4.86	1.16	No	No	No	No	Yes	No	0	0
778	170.909	1_Johor	SMK ST ANDREW	56	Female	Chinese	Degree	Married	No	No	Low	220	No Sedentary	>=2	<3	Inadequate	6.5	< 7 hrs	79.5	No central obese	2	No Depression	2	No Anxiety	2	No Stress	No	No	4.1	111	74	4.3	0.9	2.57	1.28	No	No	No	No	No	No	0	0
779	170.909	1_Johor	SMK ST ANDREW	32	Male	Malay	Degree	Married	No	No	High	30	No Sedentary	<2	<3	Inadequate	5	< 7 hrs	76.5	No central obese	0	No Depression	4	No Anxiety	6	No Stress	No	No	5.1	127	83	6.2	0.9	4.2	1.55	No	No	No	No	No	No	0	0
780	170.909	1_Johor	SMK ST ANDREW	51	Male	Malay	Degree	Married	Yes	No	Low	186	No Sedentary	>=2	<3	Inadequate	5.80337	< 7 hrs	80.5	No central obese	0	No Depression	0	No Anxiety	0	No Stress	No	No	5.4	131	76	4.9	0.9	3.3	1.17	No	No	No	No	No	No	0	0
781	170.909	1_Johor	SMK ST ANDREW	56	Female	Chinese	Degree	Married	No	No	Moderate	300	No Sedentary	>=2	<3	Inadequate	5.5	< 7 hrs	74.5	No central obese	12	Depression	10	Anxiety	6	No Stress	No	Yes	4.8	113	61	5.5	0.8	2.72	1.80808	No	No	No	No	No	Yes	0	0
782	170.909	1_Johor	SMK ST ANDREW	35	Female	Malay	Degree	Single	No	No	Low	166	No Sedentary	<2	>=3	Inadequate	6	< 7 hrs	66.9	No central obese	36	Depression	38	Anxiety	30	Stress	No	No	4.4	112	70	7	0.8	4.55	2.1	No	No	No	No	No	No	0	0
783	170.909	1_Johor	SMK ST ANDREW	53	Male	Chinese	Degree	Married	Yes	No	Low	300	No Sedentary	>=2	<3	Inadequate	6.59423	< 7 hrs	92	Central obese	2	No Depression	2	No Anxiety	0	No Stress	No	No	6.7	130	76	5.56923	1.62115	3.45269	1.25	No	Yes	No	No	No	Yes		1
784	170.909	1_Johor	SMK ST ANDREW	27	Female	Malay	Degree	Single	No	No	Low	120	No Sedentary	<2	<3	Inadequate	7	7 hrs and above	81	Central obese	14	Depression	14	Anxiety	14	Stress	No	No	4.8	139	79	5.2	0.8	3.21	1.58	No	No	No	No	No	No	0	0
785	170.909	1_Johor	SMK ST ANDREW	44	Female	Malay	Degree	Married	Yes	No	Moderate	120	No Sedentary	<2	<3	Inadequate	4.5	< 7 hrs	70.5	No central obese	0	No Depression	4	No Anxiety	0	No Stress	No	No	4.6	144	83	4.3	1.6	1.98	1.55	No	No	No	No	No	No	0	0
786	174.872	1_Johor	SMK GEMEREH	56	Female	Malay	Degree	Married	Yes	No	Low	186	No Sedentary	<2	<3	Inadequate	5	< 7 hrs	96	Central obese	0	No Depression	2	No Anxiety	2	No Stress	No	No	11.7	152	88	6.4	1.4	4.15	1.61	No	Yes	No	No	No	No		1
788	174.872	1_Johor	SMK GEMEREH	27	Female	Malay	Degree	Married	Yes	No	Moderate	300	No Sedentary	>=2	<3	Inadequate	7.5	7 hrs and above	86	Central obese	4	No Depression	4	No Anxiety	6	No Stress	No	No	4.4	112	59	5.1	1	3.41	1.24	No	No	No	No	No	No	0	0
789	174.872	1_Johor	SMK GEMEREH	40	Male	Malay	Degree	Married	Yes	No	Moderate	120	No Sedentary	<2	>=3	Inadequate	7.5	7 hrs and above	96	Central obese	16	Depression	18	Anxiety	22	Stress	No	No	5.1	126	85	5.4	1.7	2.87	1.76	No	No	No	No	No	No	0	0
791	174.872	1_Johor	SMK GEMEREH	46	Female	Malay	Degree	Married	No	No	Low	420	No Sedentary	<2	<3	Inadequate	7	7 hrs and above	77	No central obese	0	No Depression	2	No Anxiety	0	No Stress	No	No	4.4	108	68	5.1	1.3	3.06	1.45	No	No	No	No	No	No	0	0
793	174.872	1_Johor	SMK GEMEREH	28	Male	Malay	Degree	Married	Yes	No	Moderate	156	No Sedentary	<2	<3	Inadequate	6	< 7 hrs	99	Central obese	0	No Depression	0	No Anxiety	2	No Stress	No	No	5.2	133	77	5.5	1.3	3.63	1.28	No	No	No	No	No	No	0	0
794	174.872	1_Johor	SMK GEMEREH	44	Female	Malay	Degree	Married	Yes	Yes	Low	300	No Sedentary	>=2	<3	Inadequate	5.5	< 7 hrs	95	Central obese	2	No Depression	16	Anxiety	12	No Stress	No	No	10.2	143	78	6	1.64231	3.22	1.33	Yes	No	Yes	Yes	No	No		1
795	174.872	1_Johor	SMK GEMEREH	25	Female	Malay	Degree	Married	No	No	Moderate	30	No Sedentary	<2	<3	Inadequate	5.5	< 7 hrs	62.5	No central obese	14	Depression	22	Anxiety	22	Stress	No	No	4.7	103	70	5.1	0.6	2.76	2.07	No	No	No	No	No	No	0	0
796	174.872	1_Johor	SMK GEMEREH	32	Female	Malay	Degree	Single	Yes	No	Low	199	No Sedentary	<2	<3	Inadequate	7	7 hrs and above	70.5	No central obese	14	Depression	6	No Anxiety	12	No Stress	No	No	4.4	113	59	6.5	1.4	4.34	1.52	No	No	No	No	No	No	0	0
797	174.872	1_Johor	SMK GEMEREH	46	Female	Malay	Degree	Married	No	No	High	3	No Sedentary	>=2	<3	Inadequate	7	7 hrs and above	71	No central obese	12	Depression	10	Anxiety	14	Stress	No	No	4.9	133	83	5.8	0.8	3.27	2.17	No	No	No	No	No	No	0	0
798	174.872	1_Johor	SMK GEMEREH	28	Female	Malay	Degree	Married	Yes	No	Low	90	No Sedentary	<2	<3	Inadequate	7	7 hrs and above	69.5	No central obese	10	Depression	24	Anxiety	18	Stress	No	No	4.7	115	60	4.57885	0.4	1.79	1.43	No	No	No	No	No	No	0	0
799	170.909	1_Johor	SMK LENGA	39	Male	Malay	Degree	Married	Yes	No	Low	180	No Sedentary	<2	<3	Inadequate	5.5	< 7 hrs	104	Central obese	4	No Depression	14	Anxiety	8	No Stress	No	No	5.3	153	95	5.5	1.1	3.78	1.2	No	No	No	No	No	Yes	0	0
800	170.909	1_Johor	SMK LENGA	46	Male	Malay	Degree	Married	No	No	Moderate	300	No Sedentary	<2	<3	Inadequate	6.5	< 7 hrs	77	No central obese	4	No Depression	12	Anxiety	8	No Stress	Yes	No	4.5	131	87	6	1.3	3.7	1.77	No	No	No	No	No	No	0	0
801	170.909	1_Johor	SMK LENGA	42	Male	Malay	Degree	Married	No	No	Moderate	45	No Sedentary	<2	<3	Inadequate	5	< 7 hrs	90	Central obese	2	No Depression	2	No Anxiety	4	No Stress	No	No	4.8	136	89	4.7	1.9	2.72	1.11	No	No	No	No	No	No	0	0
802	170.909	1_Johor	SMK LENGA	49	Male	Malay	Diploma and below	Married	No	No	High	135	No Sedentary	<2	>=3	Inadequate	8	7 hrs and above	94	Central obese	8	No Depression	6	No Anxiety	8	No Stress	No	No	5	150	94	6.7	1.3	4.51	1.56	No	No	No	No	No	No	0	0
803	170.909	1_Johor	SMK LENGA	46	Male	Malay	Master and above	Married	No	No	Moderate	120	No Sedentary	<2	<3	Inadequate	5.5	< 7 hrs	85	No central obese	0	No Depression	4	No Anxiety	4	No Stress	No	No	5.6	124	80	6.3	1	4.18	1.71	No	Yes	No	No	No	No	1	0
804	170.909	1_Johor	SMK LENGA	55	Male	Malay	Degree	Married	Yes	No	High	209	No Sedentary	<2	<3	Inadequate	5	< 7 hrs	89	No central obese	4	No Depression	2	No Anxiety	4	No Stress	No	No	4.2	127	75	6.3	1.8	4.03	1.41	No	No	No	No	No	Yes	0	0
805	170.909	1_Johor	SMK LENGA	31	Male	Malay	Degree	Married	Yes	No	Low	152	No Sedentary	<2	<3	Inadequate	7	7 hrs and above	66	No central obese	12	Depression	14	Anxiety	14	Stress	No	No	4.4	110	68	4.79615	0.8	2.2	0.86	No	No	No	No	No	No	0	0
806	170.909	1_Johor	SMK LENGA	32	Male	Malay	Diploma and below	Married	No	No	Low	300	No Sedentary	<2	<3	Inadequate	7	7 hrs and above	96.1731	Central obese	26	Depression	28	Anxiety	24	Stress	No	No	7	159	91	6	2.4	3.92	1.04	No	Yes	No	No	No	No		1
807	170.909	1_Johor	SMK LENGA	30	Female	Malay	Degree	Married	Yes	No	Moderate	180	No Sedentary	<2	<3	Inadequate	5	< 7 hrs	70	No central obese	8	No Depression	4	No Anxiety	10	No Stress	No	No	4.5	107	59	4.8	0.8	3.08	1.35	No	No	No	No	No	No	0	0
808	170.909	1_Johor	SMK LENGA	33	Female	Malay	Degree	Single	Yes	No	Low	200	No Sedentary	<2	<3	Inadequate	6.5	< 7 hrs	81	Central obese	0	No Depression	4	No Anxiety	0	No Stress	No	No	5	137	72	6.1	1.3	4.15	1.35	No	No	No	No	No	No	0	0
809	170.909	1_Johor	SMK LENGA	32	Male	Malay	Degree	Married	No	No	Moderate	161	No Sedentary	<2	<3	Inadequate	5.5	< 7 hrs	81	No central obese	0	No Depression	0	No Anxiety	2	No Stress	No	No	4.8	139	70	4.9	1.4	3.08	1.16	No	No	No	No	No	No	0	0
810	170.909	1_Johor	SMK LENGA	45	Female	Malay	Degree	Married	No	No	Moderate	120	No Sedentary	<2	>=3	Inadequate	6.5	< 7 hrs	73	No central obese	0	No Depression	0	No Anxiety	0	No Stress	No	No	4.9	142	75	6.4	0.8	4.11	1.98	No	No	No	No	No	No	0	0
811	170.909	1_Johor	SMK LENGA	34	Female	Malay	Degree	Married	No	No	Low	240	No Sedentary	>=2	<3	Inadequate	6	< 7 hrs	90	Central obese	0	No Depression	0	No Anxiety	0	No Stress	No	No	4.9	146.308	100	5.4	1	3.56	1.34	No	No	No	No	Yes	No	0	0
812	170.909	1_Johor	SMK LENGA	36	Female	Chinese	Diploma and below	Married	No	No	Low	90	No Sedentary	<2	<3	Inadequate	7	7 hrs and above	71	No central obese	0	No Depression	0	No Anxiety	0	No Stress	No	No	4.8	122	85	4.8	1.3	3.21	1.04	No	No	No	No	No	No	0	0
813	232.44	1_Johor	SMK SERI GADING	50	Male	Malay	Diploma and below	Married	Yes	No	Low	180	No Sedentary	<2	<3	Inadequate	5.5	< 7 hrs	92	Central obese	0	No Depression	0	No Anxiety	0	No Stress	Yes	No	5.1	133	95	5.6	1.825	3.15	1	No	No	No	No	No	No	0	0
814	232.44	1_Johor	SMK SERI GADING	46	Female	Malay	Degree	Married	No	No	High	480	No Sedentary	<2	<3	Inadequate	6.5	< 7 hrs	67	No central obese	0	No Depression	4	No Anxiety	0	No Stress	No	No	5.1	122	75	5	0.7	2.98	1.7	No	No	No	No	No	No	0	0
815	232.44	1_Johor	SMK SERI GADING	36	Female	Malay	Degree	Married	Yes	No	Low	186	No Sedentary	<2	<3	Inadequate	6.5	< 7 hrs	87	Central obese	8	No Depression	14	Anxiety	12	No Stress	No	No	4.3	150	80	6.2	1.2	4.26	1.4	No	No	No	No	No	Yes	0	0
816	232.44	1_Johor	SMK SERI GADING	33	Female	Malay	Degree	Married	No	No	Low	30	No Sedentary	<2	<3	Inadequate	7.5	7 hrs and above	80	Central obese	2	No Depression	4	No Anxiety	4	No Stress	No	No	4.9	114	67	4.2	0.8	2.24	1.6	No	No	No	No	No	No	0	0
817	232.44	1_Johor	SMK SERI GADING	32	Female	Malay	Degree	Married	Yes	No	Moderate	120	No Sedentary	<2	<3	Inadequate	6.5	< 7 hrs	63	No central obese	4	No Depression	6	No Anxiety	10	No Stress	No	No	4.8	125	74	4.4	1.6	1.87	1.8	No	No	No	No	No	No	0	0
818	232.44	1_Johor	SMK SERI GADING	32	Female	Malay	Degree	Married	Yes	No	Moderate	176	No Sedentary	<2	<3	Inadequate	7.5	7 hrs and above	77	No central obese	2	No Depression	6	No Anxiety	10	No Stress	No	No	4.6	111	63	5.3	0.8	3.44	1.5	No	No	No	No	No	No	0	0
819	232.44	1_Johor	SMK SERI GADING	35	Female	Malay	Degree	Married	Yes	No	Moderate	179	No Sedentary	<2	<3	Inadequate	4.5	< 7 hrs	75	No central obese	12	Depression	8	Anxiety	10	No Stress	No	No	4.3	100	68.1923	5.5	1	3.45	1.6	No	No	No	No	No	No	0	0
820	232.44	1_Johor	SMK SERI GADING	28	Female	Malay	Degree	Married	Yes	No	Moderate	30	No Sedentary	<2	<3	Inadequate	6	< 7 hrs	64	No central obese	14	Depression	12	Anxiety	18	Stress	No	No	4.9	131	86	4.7	0.8	2.44	1.9	No	No	No	No	No	No	0	0
821	232.44	1_Johor	SMK SERI GADING	33	Female	Malay	Master and above	Married	No	No	Low	120	No Sedentary	<2	<3	Inadequate	7	7 hrs and above	74	No central obese	1	No Depression	2	No Anxiety	3	No Stress	No	No	4.5	114	66	5.5	1.8	3.48	1.2	No	No	No	No	No	No	0	0
822	232.44	1_Johor	SMK SERI GADING	24	Female	Malay	Degree	Single	Yes	No	Low	206	No Sedentary	<2	<3	Inadequate	6.5	< 7 hrs	70	No central obese	10	Depression	16	Anxiety	22	Stress	No	No	4.7	111	62	5.6	1	3.25	1.9	No	No	No	No	No	No	0	0
824	232.44	1_Johor	SMK SERI GADING	29	Female	Malay	Degree	Married	No	No	Moderate	60	No Sedentary	<2	<3	Inadequate	6.5	< 7 hrs	70	No central obese	4	No Depression	6	No Anxiety	4	No Stress	No	No	4.4	118	76	4.5	0.6	2.63	1.6	No	No	No	No	No	No	0	0
825	232.44	1_Johor	SMK SERI GADING	52	Male	Malay	Master and above	Married	No	No	Moderate	120	No Sedentary	>=2	>=3	Adequate	6	< 7 hrs	86.5	No central obese	6	No Depression	8	Anxiety	4	No Stress	Yes	No	5.6	122	72	4.6	2.7	2.37	1	No	Yes	No	No	No	No	1	0
826	232.44	1_Johor	SMK SERI GADING	32	Female	Malay	Degree	Married	Yes	No	Low	173	No Sedentary	<2	<3	Inadequate	5.5	< 7 hrs	71.5	No central obese	6	No Depression	4	No Anxiety	12	No Stress	No	No	5.3	125	79	6.5	2.9	3.98	1.2	No	No	No	No	No	No	0	0
827	232.44	1_Johor	SMK SERI GADING	57	Female	Malay	Degree	Married	No	No	Low	190	No Sedentary	>=2	>=3	Adequate	7	7 hrs and above	69	No central obese	0	No Depression	0	No Anxiety	0	No Stress	No	No	4.7	151	82	6.5	1.2	4.06	1.9	No	No	No	No	No	No	0	0
828	232.44	1_Johor	SMK SERI GADING	50	Male	Malay	Master and above	Married	No	No	Low	60	No Sedentary	<2	<3	Inadequate	6	< 7 hrs	76.5	No central obese	0	No Depression	0	No Anxiety	0	No Stress	No	No	4.8	128	81	5.2	1.1	3.3	1.4	No	No	No	No	No	No	0	0
830	232.44	1_Johor	SMK SERI GADING	54	Male	Malay	Degree	Married	No	No	Low	120	No Sedentary	<2	>=3	Inadequate	6	< 7 hrs	90	Central obese	0	No Depression	0	No Anxiety	4	No Stress	No	No	5.9	124	81	6.1	0.9	4.29	1.4	No	Yes	No	No	No	No	1	0
831	883.55	1_Johor	SMK TAMAN PELANGI	26	Female	Malay	Degree	Married	Yes	No	Low	162	No Sedentary	<2	<3	Inadequate	6.5	< 7 hrs	70	No central obese	6	No Depression	10	Anxiety	14	Stress	No	No	5.1	116	82	5.24808	1.2	1.96	1	No	No	No	No	No	No	0	0
832	883.55	1_Johor	SMK TAMAN PELANGI	31	Female	Malay	Degree	Married	Yes	No	Low	217	No Sedentary	<2	<3	Inadequate	6	< 7 hrs	83	Central obese	10	Depression	10	Anxiety	12	No Stress	No	No	4.7	118	78	6.1	1.5	3.62	1.8	No	No	No	No	No	No	0	0
833	883.55	1_Johor	SMK TAMAN PELANGI	27	Female	Malay	Degree	Married	No	No	High	300	No Sedentary	<2	<3	Inadequate	7.5	7 hrs and above	79	No central obese	0	No Depression	8	Anxiety	4	No Stress	No	No	4.6	105	68	5.3	1.2	3.06	1.7	No	No	No	No	No	No	0	0
834	883.55	1_Johor	SMK TAMAN PELANGI	32	Female	Malay	Degree	Married	No	No	Moderate	164	No Sedentary	<2	<3	Inadequate	8	7 hrs and above	83	Central obese	10	Depression	2	No Anxiety	8	No Stress	No	No	4.9	108	72.2692	4.9	0.7	3.18	1.4	No	No	No	No	No	No	0	0
835	883.55	1_Johor	SMK TAMAN PELANGI	29	Female	Malay	Degree	Married	No	No	Moderate	197	No Sedentary	>=2	<3	Inadequate	7	7 hrs and above	61	No central obese	6	No Depression	8	Anxiety	12	No Stress	No	No	4.56731	105	66	6.6	0.4	4.32	2.1	No	No	No	No	No	No	0	0
836	883.55	1_Johor	SMK TAMAN PELANGI	42	Female	Malay	Degree	Married	Yes	No	Low	172	No Sedentary	>=2	<3	Inadequate	5	< 7 hrs	77	No central obese	6	No Depression	14	Anxiety	14	Stress	No	No	9.8	131	77	6.7	1.39615	3.79	1.5	Yes	No	Yes	No	No	Yes		1
837	883.55	1_Johor	SMK TAMAN PELANGI	32	Female	Malay	Degree	Single	No	No	Moderate	60	No Sedentary	<2	<3	Inadequate	4.5	< 7 hrs	65	No central obese	0	No Depression	4	No Anxiety	2	No Stress	No	No	5.4	111	73	4.6	0.7	2.18	2.1	No	No	No	No	No	No	0	0
838	883.55	1_Johor	SMK TAMAN PELANGI	36	Female	Malay	Master and above	Married	Yes	No	Moderate	186	No Sedentary	<2	>=3	Inadequate	5	< 7 hrs	91	Central obese	8	No Depression	8	Anxiety	8	No Stress	No	No	4.6	143	91	4.1	0.7	2.38	1.4	No	No	No	No	No	No	0	0
839	336.59	1_Johor	SMK GELANG PATAH	44	Female	Chinese	Degree	Married	Yes	No	Low	222	No Sedentary	<2	<3	Inadequate	8	7 hrs and above	94	Central obese	16	Depression	12	Anxiety	16	Stress	No	No	4.6	155	86	5.3	0.8	3.24	1.7	No	No	No	No	No	No	0	0
841	336.59	1_Johor	SMK GELANG PATAH	45	Female	Malay	Degree	Married	Yes	Yes	Moderate	200	No Sedentary	<2	<3	Inadequate	6.5	< 7 hrs	96	Central obese	4	No Depression	0	No Anxiety	8	No Stress	No	No	6.3	120	78	5.8	1.9	3.64	1.3	No	Yes	No	No	No	No		1
842	336.59	1_Johor	SMK GELANG PATAH	29	Female	Malay	Degree	Single	No	No	Low	221	No Sedentary	<2	>=3	Inadequate	5	< 7 hrs	73	No central obese	2	No Depression	4	No Anxiety	4	No Stress	No	No	4.6	108	75	5.7	1.2	3.66	1.5	No	No	No	No	No	No	0	0
843	336.59	1_Johor	SMK GELANG PATAH	34	Female	Malay	Degree	Married	No	No	High	180	No Sedentary	<2	<3	Inadequate	5.5	< 7 hrs	73	No central obese	12	Depression	12	Anxiety	12	No Stress	No	No	4.4	116	78	4.6	0.8	2.84	1.4	No	No	No	No	No	No	0	0
844	336.59	1_Johor	SMK GELANG PATAH	38	Male	Malay	Degree	Married	Yes	No	High	120	No Sedentary	<2	<3	Inadequate	6	< 7 hrs	111	Central obese	0	No Depression	0	No Anxiety	0	No Stress	Yes	No	5.1	117	71	5.9	2.7	3.67	1	No	No	No	No	No	Yes	0	0
845	336.59	1_Johor	SMK GELANG PATAH	46	Female	Malay	Degree	Married	Yes	No	High	60	No Sedentary	>=2	<3	Inadequate	5.54135	< 7 hrs	81	Central obese	14	Depression	10	Anxiety	16	Stress	No	No	4.9	117	79	5.9	1.2	3.66	1.7	No	No	No	No	No	No	0	0
846	336.59	1_Johor	SMK GELANG PATAH	32	Female	Malay	Degree	Single	No	No	Low	120	No Sedentary	<2	<3	Inadequate	7.64712	7 hrs and above	69	No central obese	0	No Depression	2	No Anxiety	0	No Stress	No	No	4.8	114	65	5.2	0.8	3.34	1.5	No	No	No	No	No	No	0	0
847	336.59	1_Johor	SMK GELANG PATAH	48	Female	Malay	Degree	Married	Yes	No	Moderate	120	No Sedentary	<2	<3	Inadequate	6.5	< 7 hrs	81	Central obese	4	No Depression	14	Anxiety	8	No Stress	No	No	5.1	109	59	4.2	0.4	2.22	1.8	No	No	No	No	No	No	0	0
848	336.59	1_Johor	SMK GELANG PATAH	34	Male	Malay	Diploma and below	Married	Yes	No	Moderate	180	No Sedentary	<2	<3	Inadequate	7	7 hrs and above	102	Central obese	8	No Depression	6	No Anxiety	10	No Stress	No	No	5	139	81	6.4	1.725	3.57	1.1	No	No	No	No	No	No	0	0
849	336.59	1_Johor	SMK GELANG PATAH	28	Female	Malay	Degree	Single	No	No	Moderate	157	No Sedentary	<2	<3	Inadequate	6	< 7 hrs	82	Central obese	4	No Depression	6	No Anxiety	8	No Stress	No	No	4.6	115	73	3.7	0.8	1.84	1.5	No	No	No	No	No	No	0	0
850	336.59	1_Johor	SMK GELANG PATAH	37	Female	Malay	Degree	Married	Yes	No	Moderate	120	No Sedentary	<2	<3	Inadequate	6.5	< 7 hrs	88	Central obese	16	Depression	12	Anxiety	14	Stress	No	No	5.2	126	64	4.6	1.6	2.67	1.2	No	No	No	No	No	No	0	0
851	336.59	1_Johor	SMK GELANG PATAH	29	Female	Malay	Degree	Married	Yes	No	Low	300	No Sedentary	<2	<3	Inadequate	5	< 7 hrs	73	No central obese	0	No Depression	2	No Anxiety	2	No Stress	No	No	4.6	111	59	3.7	0.8	2.14	1.2	No	No	No	No	No	No	0	0
852	336.59	1_Johor	SMK GELANG PATAH	37	Female	Indian	Degree	Married	Yes	No	High	162	No Sedentary	<2	<3	Inadequate	5	< 7 hrs	88	Central obese	6	No Depression	8	Anxiety	10	No Stress	No	No	4.6	112	68	5.3	1	3.45	1.4	No	No	No	No	No	No	0	0
853	336.59	1_Johor	SMK GELANG PATAH	30	Female	Malay	Degree	Married	No	No	Moderate	138	No Sedentary	<2	<3	Inadequate	6	< 7 hrs	80	Central obese	8	No Depression	12	Anxiety	12	No Stress	No	No	4.1	126	74	5	0.6	2.53	2.2	No	No	No	No	No	No	0	0
854	336.59	1_Johor	SMK GELANG PATAH	31	Female	Malay	Degree	Single	No	No	Moderate	175	No Sedentary	<2	<3	Inadequate	6.5	< 7 hrs	68	No central obese	0	No Depression	2	No Anxiety	4	No Stress	No	No	5.2	122	64	4	0.8	2.04	1.6	No	No	No	No	No	No	0	0
855	336.59	1_Johor	SMK GELANG PATAH	42	Female	Malay	Degree	Married	Yes	No	High	360	No Sedentary	<2	<3	Inadequate	6	< 7 hrs	80	Central obese	6	No Depression	2	No Anxiety	14	Stress	No	No	5.2	138	67	5.8	1.2	3.96	1.3	No	No	No	No	No	No	0	0
856	336.59	1_Johor	SMK GELANG PATAH	37	Female	Malay	Degree	Married	No	No	Low	180	No Sedentary	>=2	>=3	Adequate	5	< 7 hrs	69	No central obese	10	Depression	14	Anxiety	14	Stress	No	No	4.9	120	80	4.6	0.7	2.58	1.7	No	No	No	No	No	No	0	0
857	336.59	1_Johor	SMK GELANG PATAH	34	Female	Indian	Degree	Married	Yes	Yes	Moderate	175	No Sedentary	<2	<3	Inadequate	7	7 hrs and above	84	Central obese	10	Depression	12	Anxiety	14	Stress	No	No	5.2	128	75.4231	3.6	0.7	2.18	1.1	No	No	No	No	No	No	0	0
858	336.59	1_Johor	SMK GELANG PATAH	40	Female	Malay	Degree	Married	No	No	Moderate	174	No Sedentary	<2	<3	Inadequate	5.5	< 7 hrs	83	Central obese	0	No Depression	2	No Anxiety	2	No Stress	No	No	5.2	109	71	4.1	0.8	2.34	1.4	No	No	No	No	No	No	0	0
859	336.59	1_Johor	SMK GELANG PATAH	31	Female	Malay	Degree	Married	Yes	Yes	Low	30	No Sedentary	<2	<3	Inadequate	5.5	< 7 hrs	89	Central obese	2	No Depression	2	No Anxiety	2	No Stress	No	No	4.8	116	75	5.5	0.8	3.34	1.8	No	No	No	No	No	No	0	0
861	169.436	1_Johor	SMK PASIR GUDANG	46	Female	Malay	Degree	Married	No	No	High	168	No Sedentary	<2	>=3	Inadequate	4	< 7 hrs	88	Central obese	10	Depression	16	Anxiety	16	Stress	No	No	4.8	120	82	5.1	1.2	3.06	1.5	No	No	No	No	Yes	Yes	0	0
863	169.436	1_Johor	SMK PASIR GUDANG	42	Female	Malay	Degree	Married	Yes	No	High	220	No Sedentary	<2	<3	Inadequate	5	< 7 hrs	62	No central obese	14	Depression	12	Anxiety	12	No Stress	No	No	5.1	107	72	5	0.4	3.12	1.7	No	No	No	No	No	No	0	0
864	169.436	1_Johor	SMK PASIR GUDANG	29	Male	Malay	Degree	Married	Yes	No	Moderate	360	No Sedentary	<2	<3	Inadequate	6.20048	< 7 hrs	92	Central obese	4	No Depression	4	No Anxiety	6	No Stress	Yes	No	5	128	76	7.1	2.2	4.9	1.2	No	No	No	No	No	No	0	0
866	169.436	1_Johor	SMK PASIR GUDANG	35	Female	Malay	Degree	Married	Yes	No	Low	120	No Sedentary	<2	<3	Inadequate	6.5	< 7 hrs	90	Central obese	4	No Depression	8	Anxiety	8	No Stress	No	No	5.4	131	72	5.2	1.3	3.41	1.2	No	No	No	No	No	No	0	0
867	169.436	1_Johor	SMK PASIR GUDANG	43	Female	Malay	Degree	Married	Yes	No	High	196	No Sedentary	<2	<3	Inadequate	5.93221	< 7 hrs	99	Central obese	4	No Depression	12	Anxiety	18	Stress	No	No	5.3	140	85	4.5	0.8	2.34	1.8	No	No	No	No	No	No	0	0
868	169.436	1_Johor	SMK PASIR GUDANG	43	Female	Malay	Degree	Married	No	No	High	300	No Sedentary	<2	<3	Inadequate	6.5	< 7 hrs	89	Central obese	8	No Depression	10	Anxiety	12	No Stress	No	No	4.7	114	74	4	1.3	2.01	1.4	No	No	No	No	No	Yes	0	0
869	169.436	1_Johor	SMK PASIR GUDANG	35	Male	Malay	Degree	Married	No	No	High	270	No Sedentary	<2	<3	Inadequate	5.5	< 7 hrs	82	No central obese	12	Depression	14	Anxiety	16	Stress	No	No	4.67885	116	76	5.3	0.8	2.94	2	No	No	No	No	No	No	0	0
870	169.436	1_Johor	SMK PASIR GUDANG	29	Female	Malay	Diploma and below	Married	Yes	No	Low	182	No Sedentary	<2	<3	Inadequate	5.5	< 7 hrs	66	No central obese	14	Depression	6	No Anxiety	10	No Stress	No	No	4.7	121	66	4.5	2.1	2.55	1	No	No	No	No	No	No	0	0
871	169.436	1_Johor	SMK PASIR GUDANG	31	Female	Malay	Degree	Married	Yes	No	Low	180	No Sedentary	<2	<3	Inadequate	6	< 7 hrs	68	No central obese	6	No Depression	4	No Anxiety	8	No Stress	No	No	4.8	107	67	3.8	1.2	1.86	1.4	No	No	No	No	No	No	0	0
872	169.436	1_Johor	SMK PASIR GUDANG	39	Female	Malay	Degree	Married	Yes	No	Low	234	No Sedentary	>=2	<3	Inadequate	6	< 7 hrs	78	No central obese	0	No Depression	4	No Anxiety	16	Stress	No	No	5.3	113	76	4.6	0.7	3.18	1.1	No	No	No	No	No	No	0	0
873	169.436	1_Johor	SMK PASIR GUDANG	27	Male	Malay	Degree	Single	Yes	No	Low	159	No Sedentary	<2	<3	Inadequate	5	< 7 hrs	74	No central obese	2	No Depression	0	No Anxiety	0	No Stress	No	No	5	118	64	4.2	0.8	2.34	1.5	No	No	No	No	No	No	0	0
874	169.436	1_Johor	SMK PASIR GUDANG	43	Male	Malay	Master and above	Married	Yes	No	Moderate	234	No Sedentary	<2	<3	Inadequate	4	< 7 hrs	90	Central obese	2	No Depression	8	Anxiety	6	No Stress	No	No	4.8	114	73	4.6	2.7	2.47	1.9	No	No	No	No	No	No	0	0
875	169.436	1_Johor	SMK PASIR GUDANG	31	Male	Malay	Degree	Married	Yes	No	High	180	No Sedentary	<2	<3	Inadequate	6	< 7 hrs	88	No central obese	12	Depression	10	Anxiety	20	Stress	Yes	No	4.7	140	93	5.4	1	3.65	1.3	No	No	No	No	No	No	0	0
877	169.436	1_Johor	SMK PASIR GUDANG	32	Female	Malay	Degree	Married	No	Yes	Low	60	No Sedentary	<2	<3	Inadequate	5.38942	< 7 hrs	73	No central obese	6	No Depression	4	No Anxiety	8	No Stress	No	No	4.9	90	69.1731	5.3	0.9	3.49	1.4	No	No	No	No	No	No	0	0
879	169.436	1_Johor	SMK PASIR GUDANG	34	Female	Malay	Degree	Married	Yes	No	Low	177	No Sedentary	<2	<3	Inadequate	5.5	< 7 hrs	87	Central obese	8	No Depression	10	Anxiety	16	Stress	No	No	4.6	116	61	4.5	0.8	2.54	1.6	No	No	No	No	No	No	0	0
880	169.436	1_Johor	SMK PASIR GUDANG	36	Female	Malay	Degree	Married	No	No	High	210	No Sedentary	<2	<3	Inadequate	6.5	< 7 hrs	73	No central obese	2	No Depression	2	No Anxiety	8	No Stress	No	No	4.4	102	64	4.2	0.6	2.53	1.4	No	No	No	No	No	No	0	0
881	169.436	1_Johor	SMK PASIR GUDANG	29	Female	Malay	Degree	Married	No	No	Moderate	155	No Sedentary	<2	<3	Inadequate	7	7 hrs and above	77	No central obese	4	No Depression	6	No Anxiety	8	No Stress	No	No	4.6	110	70	4.3	0.7	2.88	1.1	No	No	No	No	No	No	0	0
882	169.436	1_Johor	SMK PASIR GUDANG	28	Female	Malay	Degree	Married	Yes	No	Low	30	No Sedentary	<2	<3	Inadequate	8	7 hrs and above	70	No central obese	2	No Depression	0	No Anxiety	14	Stress	No	No	4.4	99	61	3.9	0.4	2.32	1.4	No	No	No	No	No	No	0	0
883	169.436	1_Johor	SMK PASIR GUDANG	48	Female	Malay	Degree	Married	Yes	No	High	900	sedentary	>=2	<3	Inadequate	5.5	< 7 hrs	84	Central obese	2	No Depression	6	No Anxiety	6	No Stress	No	No	10.8	170	86	5.9	2.1	3.55	1.4	No	Yes	No	No	Yes	No		1
884	169.436	1_Johor	SMK PASIR GUDANG	47	Female	Malay	Diploma and below	Married	No	No	Low	155	No Sedentary	<2	<3	Inadequate	6.23654	< 7 hrs	85	Central obese	2	No Depression	8	Anxiety	8	No Stress	No	No	5.5	142	84	4.6	1	2.65	1.5	No	No	No	No	Yes	No	0	0
885	169.436	1_Johor	SMK PASIR GUDANG	51	Male	Malay	Degree	Married	Yes	No	Moderate	120	No Sedentary	<2	<3	Inadequate	5	< 7 hrs	91	Central obese	12	Depression	8	Anxiety	16	Stress	No	No	4.8	146	70	6.7	2.2	4.4	1.3	No	No	No	No	No	No	0	0
886	169.436	1_Johor	SMK PASIR GUDANG	41	Male	Malay	Degree	Married	No	No	Moderate	213	No Sedentary	<2	>=3	Inadequate	7.66154	7 hrs and above	85	No central obese	1	No Depression	2	No Anxiety	2	No Stress	No	No	4.4	116	82	5.1	1.5	3.22	1.2	No	No	No	No	No	Yes	0	0
887	169.436	1_Johor	SMK PASIR GUDANG	32	Male	Malay	Degree	Married	No	No	Moderate	110	No Sedentary	<2	<3	Inadequate	5	< 7 hrs	86	No central obese	10	Depression	10	Anxiety	14	Stress	No	No	5.2	123	63	4.8	0.8	3.34	1.1	No	No	No	No	No	No	0	0
888	169.436	1_Johor	SMK PASIR GUDANG	32	Female	Malay	Master and above	Married	No	No	Low	300	No Sedentary	<2	<3	Inadequate	6.5	< 7 hrs	73	No central obese	6	No Depression	8	Anxiety	10	No Stress	No	No	4.2	111	69.1538	4.6	0.7	2.38	1.9	No	No	No	No	No	No	0	0
889	169.436	1_Johor	SMK PASIR GUDANG	32	Female	Malay	Degree	Married	No	No	Moderate	300	No Sedentary	>=2	>=3	Adequate	6.37115	< 7 hrs	92	Central obese	2	No Depression	8	Anxiety	8	No Stress	No	No	4.9	122	77	4.9	0.8	3.14	1.4	No	No	No	No	No	No	0	0
890	169.436	1_Johor	SMK PASIR GUDANG	31	Female	Malay	Degree	Married	No	No	Moderate	120	No Sedentary	<2	<3	Inadequate	5.5	< 7 hrs	67	No central obese	0	No Depression	2	No Anxiety	0	No Stress	No	No	4.5	96	63	4.1	0.5	1.87	2	No	No	No	No	No	No	0	0
892	169.436	1_Johor	SMK PASIR GUDANG	28	Male	Malay	Degree	Married	No	No	Low	197	No Sedentary	<2	<3	Inadequate	5	< 7 hrs	100	Central obese	8	No Depression	10	Anxiety	14	Stress	Yes	No	4.7	115	76	5	1.6	3.07	1.2	No	No	No	No	No	No	0	0
893	169.436	1_Johor	SMK PASIR GUDANG	41	Female	Malay	Degree	Married	Yes	No	Low	190	No Sedentary	<2	<3	Inadequate	6	< 7 hrs	98	Central obese	14	Depression	18	Anxiety	14	Stress	No	No	5.3	140	90	5	0.7	3.18	1.5	No	No	No	No	No	Yes	0	0
894	169.436	1_Johor	SMK PASIR GUDANG	28	Female	Malay	Degree	Married	No	No	Low	180	No Sedentary	>=2	<3	Inadequate	4	< 7 hrs	64	No central obese	14	Depression	6	No Anxiety	14	Stress	No	No	4.49423	106	71	4.3	0.4	2.22	1.9	No	No	No	No	No	No	0	0
896	169.436	1_Johor	SMK PASIR GUDANG	40	Female	Malay	Degree	Married	No	No	Low	156	No Sedentary	<2	<3	Inadequate	5	< 7 hrs	90	Central obese	6	No Depression	6	No Anxiety	2	No Stress	No	No	4.6	103	73	6.6	0.7	4.68	1.6	No	No	No	No	No	Yes	0	0
898	169.436	1_Johor	SMK PASIR GUDANG	53	Female	Malay	Degree	Married	Yes	No	Moderate	180	No Sedentary	<2	>=3	Inadequate	6	< 7 hrs	96	Central obese	0	No Depression	2	No Anxiety	2	No Stress	No	No	4.6	128	75	6.2	1.3	3.61	2	No	No	No	No	No	Yes	0	0
899	169.436	1_Johor	SMK PASIR GUDANG	32	Female	Malay	Degree	Married	Yes	No	High	180	No Sedentary	>=2	<3	Inadequate	7	7 hrs and above	88	Central obese	8	No Depression	8	Anxiety	12	No Stress	No	No	4.7	131	67	3.9	0.8	2.24	1.3	No	No	No	No	No	No	0	0
900	169.436	1_Johor	SMK PASIR GUDANG	26	Female	Malay	Degree	Single	Yes	No	Low	120	No Sedentary	<2	>=3	Inadequate	8	7 hrs and above	66	No central obese	0	No Depression	0	No Anxiety	0	No Stress	No	No	4.3	100	59	5.9	0.7	3.98	1.6	No	No	No	No	No	No	0	0
901	169.436	1_Johor	SMK PASIR GUDANG	33	Female	Malay	Degree	Married	Yes	No	Moderate	135	No Sedentary	<2	<3	Inadequate	6.45	< 7 hrs	85	Central obese	4	No Depression	0	No Anxiety	2	No Stress	No	No	4.6	110	65	4.9	0.7	3.18	1.4	No	No	No	No	No	No	0	0
902	169.436	1_Johor	SMK PASIR GUDANG	38	Female	Malay	Degree	Married	Yes	Yes	Moderate	169	No Sedentary	<2	<3	Inadequate	4	< 7 hrs	88	Central obese	28	Depression	30	Anxiety	28	Stress	No	No	4.3	124	75	5.2	0.9	3.49	1.3	No	No	No	No	Yes	No	0	0
903	169.436	1_Johor	SMK PASIR GUDANG	33	Female	Malay	Master and above	Married	No	No	Moderate	209	No Sedentary	<2	<3	Inadequate	5.5	< 7 hrs	74	No central obese	0	No Depression	12	Anxiety	12	No Stress	No	No	4.2	116.885	74	5.8	0.6	3.93	1.6	No	No	No	No	No	No	0	0
905	169.436	1_Johor	SMK PASIR GUDANG	38	Female	Malay	Degree	Married	No	No	High	30	No Sedentary	<2	<3	Inadequate	6.5	< 7 hrs	81	Central obese	12	Depression	12	Anxiety	16	Stress	No	No	4.8	135	89	4.9	1.6	3.17	1	No	No	No	No	No	No	0	0
906	169.436	1_Johor	SMK PASIR GUDANG	41	Female	Malay	Degree	Married	Yes	No	Low	175	No Sedentary	>=2	<3	Inadequate	8	7 hrs and above	108	Central obese	1	No Depression	3	No Anxiety	2	No Stress	No	No	4.7	167	104	4.8	1.6	2.67	1.4	No	No	Yes	No	Yes	Yes		1
907	169.436	1_Johor	SMK PASIR GUDANG	36	Female	Indian	Degree	Married	Yes	Yes	High	180	No Sedentary	<2	<3	Inadequate	7.5	7 hrs and above	103	Central obese	0	No Depression	4	No Anxiety	6	No Stress	No	No	7.5	118	64	4.5	1.5	2.92	0.9	No	Yes	No	No	No	No		1
908	169.436	1_Johor	SMK PASIR GUDANG	32	Female	Malay	Degree	Married	No	No	Low	159	No Sedentary	>=2	>=3	Adequate	6	< 7 hrs	74	No central obese	8	No Depression	12	Anxiety	14	Stress	No	No	5	107	69.9423	5	0.8	2.84	1.8	No	No	No	No	No	No	0	0
909	169.436	1_Johor	SMK PASIR GUDANG	31	Female	Malay	Degree	Married	No	No	High	45	No Sedentary	<2	<3	Inadequate	5.5	< 7 hrs	70	No central obese	8	No Depression	10	Anxiety	14	Stress	No	No	5.5	101	63	4.99231	0.8	3.08481	1.2	No	No	No	No	No	No	0	0
910	169.436	1_Johor	SMK PASIR GUDANG	30	Male	Malay	Degree	Married	No	No	Low	138	No Sedentary	<2	<3	Inadequate	6.5	< 7 hrs	63	No central obese	10	Depression	10	Anxiety	16	Stress	No	No	4.6	118	76	5.10385	1	1.75	1.3	No	No	No	No	No	No	0	0
911	68.862	1_Johor	SMK SEMENCHU	39	Female	Malay	Degree	Married	Yes	No	Low	188	No Sedentary	<2	<3	Inadequate	6.5	< 7 hrs	82	Central obese	4	No Depression	6	No Anxiety	10	No Stress	No	No	4.9	134	80	5	0.6	3.02	1.66	No	No	No	No	No	No	0	0
912	68.862	1_Johor	SMK SEMENCHU	24	Female	Malay	Degree	Single	No	No	High	300	No Sedentary	<2	<3	Inadequate	5.5	< 7 hrs	72	No central obese	18	Depression	24	Anxiety	20	Stress	No	No	4.9	102	60	4.2	0.6	2.69	1.19	No	No	No	No	No	No	0	0
913	68.862	1_Johor	SMK SEMENCHU	41	Male	Malay	Diploma and below	Married	No	No	Low	30	No Sedentary	<2	<3	Inadequate	5	< 7 hrs	99	Central obese	8	No Depression	12	Anxiety	12	No Stress	No	No	5.3	137	85	4.3	1.1	2.82	0.99	No	No	No	No	No	No	0	0
914	68.862	1_Johor	SMK SEMENCHU	47	Female	Malay	Degree	Married	No	No	Moderate	223	No Sedentary	<2	<3	Inadequate	8	7 hrs and above	72	No central obese	8	No Depression	10	Anxiety	10	No Stress	No	No	5	121	87	4.6	0.7	3.08	1.16	No	No	No	No	No	No	0	0
915	68.862	1_Johor	SMK SEMENCHU	43	Female	Malay	Degree	Married	No	No	Low	180	No Sedentary	<2	<3	Inadequate	8	7 hrs and above	79	No central obese	10	Depression	6	No Anxiety	10	No Stress	No	No	5	144	91	4.6	1.2	2.59	1.51	No	No	No	No	No	No	0	0
917	68.862	1_Johor	SMK SEMENCHU	43	Female	Malay	Degree	Married	No	No	Moderate	30	No Sedentary	<2	<3	Inadequate	6	< 7 hrs	68	No central obese	4	No Depression	8	Anxiety	6	No Stress	No	No	5	127	81	4.2	0.9	2.66	1.15	No	No	No	No	No	No	0	0
918	68.862	1_Johor	SMK SEMENCHU	38	Male	Malay	Degree	Married	No	No	Low	147	No Sedentary	<2	<3	Inadequate	7	7 hrs and above	83	No central obese	2	No Depression	6	No Anxiety	0	No Stress	No	No	4.8	124	78	7	1.2	4.94	1.52	No	No	No	No	No	No	0	0
919	68.862	1_Johor	SMK SEMENCHU	44	Female	Malay	Degree	Married	Yes	Yes	Low	177	No Sedentary	<2	<3	Inadequate	5.5	< 7 hrs	112	Central obese	6	No Depression	8	Anxiety	6	No Stress	No	No	4.4	171	101	3.9	1.1	2.14	1.25	No	No	No	No	No	No	0	0
920	68.862	1_Johor	SMK SEMENCHU	31	Female	Malay	Degree	Married	No	No	Low	20	No Sedentary	<2	<3	Inadequate	6.5	< 7 hrs	74	No central obese	2	No Depression	2	No Anxiety	4	No Stress	No	No	4.7	135	80	5.5	0.9	3.56	1.56	No	No	No	No	No	No	0	0
922	68.862	1_Johor	SMK SEMENCHU	28	Male	Malay	Degree	Married	No	No	Moderate	182	No Sedentary	<2	<3	Inadequate	5.5	< 7 hrs	72	No central obese	6	No Depression	4	No Anxiety	14	Stress	Yes	No	4.7	133	73	5.4	0.8	3.45	1.53	No	No	No	No	No	No	0	0
923	68.862	1_Johor	SMK SEMENCHU	45	Female	Malay	Degree	Married	No	No	Low	2	No Sedentary	<2	<3	Inadequate	7	7 hrs and above	89	Central obese	0	No Depression	2	No Anxiety	2	No Stress	No	No	5.4	145	99	5	1.3	2.99	1.36	No	No	No	No	No	Yes	0	0
924	68.862	1_Johor	SMK SEMENCHU	25	Female	Malay	Degree	Single	Yes	No	Low	180	No Sedentary	<2	<3	Inadequate	5.5	< 7 hrs	65	No central obese	8	No Depression	12	Anxiety	12	No Stress	No	No	5.2	132	80	5.5	0.6	3.27	1.94	No	No	No	No	No	No	0	0
925	68.862	1_Johor	SMK SEMENCHU	42	Female	Malay	Degree	Single	No	No	Moderate	60	No Sedentary	<2	>=3	Inadequate	6	< 7 hrs	64	No central obese	0	No Depression	0	No Anxiety	4	No Stress	No	No	4.8	111	67	5.3	0.5	3.6	1.46	No	No	No	No	No	No	0	0
926	68.862	1_Johor	SMK SEMENCHU	46	Female	Malay	Degree	Married	Yes	Yes	Moderate	60	No Sedentary	<2	>=3	Inadequate	5	< 7 hrs	74.5	No central obese	4	No Depression	2	No Anxiety	8	No Stress	No	No	4.4	149	88	4.6	1.4	2.75	1.14	No	No	No	No	No	No	0	0
927	68.862	1_Johor	SMK SEMENCHU	28	Female	Malay	Degree	Married	No	No	Low	138	No Sedentary	<2	<3	Inadequate	8	7 hrs and above	68	No central obese	4	No Depression	6	No Anxiety	8	No Stress	No	No	4	107	70	4.9	0.6	2.65	2	No	No	No	No	No	No	0	0
928	68.862	1_Johor	SMK SEMENCHU	30	Male	Malay	Degree	Married	Yes	No	Low	182	No Sedentary	<2	<3	Inadequate	5	< 7 hrs	85	No central obese	6	No Depression	4	No Anxiety	14	Stress	No	No	5.2	135	90	5.4	1	4.02	0.94	No	No	No	No	No	No	0	0
929	68.862	1_Johor	SMK SEMENCHU	37	Female	Malay	Degree	Married	Yes	No	Moderate	90	No Sedentary	>=2	<3	Inadequate	6	< 7 hrs	91	Central obese	8	No Depression	14	Anxiety	16	Stress	No	No	5.5	129	77	6.1	1.5	4.3	1.14	No	No	No	No	No	No	0	0
930	68.862	1_Johor	SMK SEMENCHU	29	Male	Malay	Degree	Married	Yes	No	Low	120	No Sedentary	<2	<3	Inadequate	5	< 7 hrs	81	No central obese	6	No Depression	4	No Anxiety	14	Stress	No	No	4.6	112	71	4	1.3	2.19	1.24	No	No	No	No	No	No	0	0
931	68.862	1_Johor	SMK SEMENCHU	25	Female	Malay	Degree	Married	No	No	Low	10	No Sedentary	<2	<3	Inadequate	8	7 hrs and above	68	No central obese	0	No Depression	0	No Anxiety	2	No Stress	No	No	4.6	114	71	4.3	0.5	2.14	1.95	No	No	No	No	No	No	0	0
934	75.778	1_Johor	SMK SEG HWA	46	Female	Malay	Degree	Divorced/Widowed	Yes	No	Moderate	174	No Sedentary	<2	<3	Inadequate	6	< 7 hrs	75	No central obese	0	No Depression	2	No Anxiety	8	No Stress	No	No	4.9	142	80	4.8	1	2.85	1.5	No	No	No	No	No	No	0	0
935	75.778	1_Johor	SMK SEG HWA	43	Female	Chinese	Degree	Married	No	Yes	Moderate	180	No Sedentary	<2	<3	Inadequate	7	7 hrs and above	97.5	Central obese	12	Depression	12	Anxiety	20	Stress	No	No	4.4	127	80	4.5	1.3	2.81	1.1	No	No	No	No	No	No	0	0
936	75.778	1_Johor	SMK SEG HWA	52	Female	Chinese	Diploma and below	Married	No	No	Low	192	No Sedentary	<2	<3	Inadequate	8	7 hrs and above	73	No central obese	2	No Depression	2	No Anxiety	4	No Stress	No	No	4.9	107	61	5.4	1	3.35	1.6	No	No	No	No	No	Yes	0	0
937	75.778	1_Johor	SMK SEG HWA	29	Female	Chinese	Degree	Single	No	No	Low	540	No Sedentary	<2	<3	Inadequate	8	7 hrs and above	62	No central obese	4	No Depression	8	Anxiety	10	No Stress	No	No	4.4	111	67	4.8	0.9	2.69	1.7	No	No	No	No	No	No	0	0
938	75.778	1_Johor	SMK SEG HWA	33	Male	Chinese	Degree	Married	Yes	No	Low	720	sedentary	<2	<3	Inadequate	6.5	< 7 hrs	83	No central obese	30	Depression	14	Anxiety	30	Stress	No	No	5.1	129	78	5.9	1.325	3.05	1.4	No	No	No	No	No	No	0	0
939	75.778	1_Johor	SMK SEG HWA	39	Female	Chinese	Degree	Married	Yes	No	Low	221	No Sedentary	>=2	<3	Inadequate	8	7 hrs and above	82	Central obese	2	No Depression	2	No Anxiety	10	No Stress	No	Yes	4.8	116	72	4.2	0.6	2.33	1.6	No	No	No	No	No	No	0	0
940	75.778	1_Johor	SMK SEG HWA	34	Female	Chinese	Degree	Married	No	No	High	435	No Sedentary	<2	<3	Inadequate	8	7 hrs and above	66.5	No central obese	12	Depression	14	Anxiety	14	Stress	No	No	4.5	100	63	4.9	0.5	2.97	1.7	No	No	No	No	No	No	0	0
941	75.778	1_Johor	SMK SEG HWA	38	Female	Chinese	Degree	Married	Yes	No	Moderate	240	No Sedentary	>=2	<3	Inadequate	7.5	7 hrs and above	80	Central obese	8	No Depression	8	Anxiety	14	Stress	No	No	4.6	118	69	4	1	2.35	1.2	No	No	No	No	No	No	0	0
942	75.778	1_Johor	SMK SEG HWA	29	Female	Malay	Degree	Married	Yes	No	Moderate	60	No Sedentary	<2	<3	Inadequate	5	< 7 hrs	70	No central obese	8	No Depression	18	Anxiety	22	Stress	No	No	6.1	123	73	4.4	0.5	2.87	1.3	No	Yes	No	No	No	No		1
943	75.778	1_Johor	SMK SEG HWA	42	Female	Malay	Degree	Married	Yes	No	High	240	No Sedentary	<2	>=3	Inadequate	6	< 7 hrs	85	Central obese	6	No Depression	16	Anxiety	12	No Stress	No	No	9.9	142	88	5.4	1.1	3.7	1.2	Yes	No	Yes	Yes	No	Yes		1
944	75.778	1_Johor	SMK SEG HWA	50	Male	Indian	Degree	Married	No	No	Low	330	No Sedentary	<2	<3	Inadequate	7	7 hrs and above	96	Central obese	8	No Depression	10	Anxiety	14	Stress	Yes	No	5.6	126	80	5.23654	1.4	1.86	0.9	No	Yes	No	No	No	No	1	0
945	75.778	1_Johor	SMK SEG HWA	49	Male	Chinese	Degree	Married	No	No	Moderate	120	No Sedentary	<2	<3	Inadequate	6.5	< 7 hrs	85	No central obese	14	Depression	14	Anxiety	14	Stress	No	Yes	5	126	75	4.6	1.3	2.91	1.1	No	No	No	No	No	No	0	0
946	75.778	1_Johor	SMK SEG HWA	33	Female	Malay	Degree	Married	Yes	No	Low	180	No Sedentary	<2	<3	Inadequate	6.5	< 7 hrs	90	Central obese	6	No Depression	16	Anxiety	14	Stress	No	No	4.3	114	59	4.3	0.6	2.83	1.2	No	No	No	No	No	No	0	0
947	75.778	1_Johor	SMK SEG HWA	29	Female	Malay	Degree	Married	No	No	High	190	No Sedentary	<2	<3	Inadequate	4.5	< 7 hrs	96	Central obese	2	No Depression	6	No Anxiety	6	No Stress	No	No	4.5	132	86	5.6	1.8	3.48	1.3	No	No	No	No	No	No	0	0
948	75.778	1_Johor	SMK SEG HWA	45	Female	Chinese	Degree	Married	Yes	Yes	Moderate	120	No Sedentary	<2	<3	Inadequate	7	7 hrs and above	73	No central obese	12	Depression	14	Anxiety	14	Stress	No	Yes	6.4	115	71	5.5	1.4	3.56	1.3	No	No	Yes	Yes	No	No		1
949	75.778	1_Johor	SMK SEG HWA	36	Male	Chinese	Degree	Married	Yes	No	Low	240	No Sedentary	<2	<3	Inadequate	6.5	< 7 hrs	96	Central obese	10	Depression	18	Anxiety	22	Stress	No	Yes	4.6	127	75	3.9	0.7	2.48	1.1	No	No	No	No	No	No	0	0
950	75.778	1_Johor	SMK SEG HWA	47	Female	Chinese	Degree	Single	Yes	No	Moderate	90	No Sedentary	<2	<3	Inadequate	8.5	7 hrs and above	73	No central obese	8	No Depression	10	Anxiety	18	Stress	No	Yes	5.1	116	65	6.1	1.9	3.44	1.8	No	No	No	No	No	No	0	0
951	75.778	1_Johor	SMK SEG HWA	40	Female	Malay	Degree	Married	No	Yes	Low	120	No Sedentary	<2	<3	Inadequate	7.5	7 hrs and above	84	Central obese	6	No Depression	12	Anxiety	10	No Stress	No	No	4.6	111	67	5.4	2	3.09	1.4	No	No	No	No	No	No	0	0
952	75.778	1_Johor	SMK SEG HWA	32	Female	Malay	Degree	Married	Yes	No	Low	180	No Sedentary	<2	<3	Inadequate	5	< 7 hrs	69	No central obese	8	No Depression	4	No Anxiety	12	No Stress	No	No	5.2	112	73	4.3	0.6	2.23	1.8	No	No	No	No	No	No	0	0
953	75.778	1_Johor	SMK SEG HWA	48	Female	Chinese	Degree	Married	No	No	Low	120	No Sedentary	<2	<3	Inadequate	7.5	7 hrs and above	84	Central obese	6	No Depression	2	No Anxiety	4	No Stress	No	No	4.5	130	76	3.9	0.9	2.19	1.3	No	No	No	No	Yes	Yes	0	0
954	75.778	1_Johor	SMK SEG HWA	30	Female	Malay	Master and above	Married	Yes	No	Low	178	No Sedentary	<2	<3	Inadequate	7.5	7 hrs and above	60.3	No central obese	12	Depression	4	No Anxiety	4	No Stress	No	No	5.5	110	68	6.5	0.6	3.93	2.3	No	No	No	No	No	No	0	0
955	75.778	1_Johor	SMK SEG HWA	29	Female	Malay	Degree	Single	No	No	Moderate	120	No Sedentary	<2	<3	Inadequate	6	< 7 hrs	83.5	Central obese	2	No Depression	8	Anxiety	2	No Stress	No	No	5	123	68	4.1	1.1	2.2	1.4	No	No	No	No	No	No	0	0
956	75.778	1_Johor	SMK SEG HWA	31	Female	Malay	Degree	Married	No	No	Moderate	184	No Sedentary	>=2	<3	Inadequate	6.4	< 7 hrs	68.5	No central obese	8	No Depression	12	Anxiety	6	No Stress	No	No	4.9	107	67	3.8	0.4	2.42	1.2	No	No	No	No	No	No	0	0
957	75.778	1_Johor	SMK SEG HWA	42	Female	Chinese	Degree	Married	No	No	Moderate	60	No Sedentary	>=2	<3	Inadequate	8.5	7 hrs and above	85	Central obese	0	No Depression	2	No Anxiety	0	No Stress	No	No	4.6	111	66	4.5	0.6	2.13	2.1	No	No	No	No	No	No	0	0
958	75.778	1_Johor	SMK SEG HWA	49	Male	Indian	Master and above	Married	No	No	Moderate	780	sedentary	<2	<3	Inadequate	7.63077	7 hrs and above	104	Central obese	28	Depression	28	Anxiety	28	Stress	No	No	4.9	145	78	4.2	1.8	2.48	0.9	No	No	No	No	No	No	0	0
959	75.778	1_Johor	SMK SEG HWA	33	Female	Chinese	Degree	Married	No	No	Moderate	180	No Sedentary	<2	<3	Inadequate	7	7 hrs and above	82	Central obese	0	No Depression	2	No Anxiety	10	No Stress	No	Yes	5.2	116	68	4.87115	0.8	1.64	1.1	No	No	No	No	No	No	0	0
960	75.778	1_Johor	SMK SEG HWA	51	Male	Malay	Degree	Married	Yes	No	Low	166	No Sedentary	<2	<3	Inadequate	4	< 7 hrs	92	Central obese	0	No Depression	0	No Anxiety	0	No Stress	No	No	4.7	135	87	5.9	1.63462	2.89	1.1	No	No	No	No	No	No	0	0
961	75.778	1_Johor	SMK SEG HWA	33	Female	Malay	Degree	Divorced/Widowed	Yes	No	Low	200	No Sedentary	<2	<3	Inadequate	8.5	7 hrs and above	64	No central obese	4	No Depression	4	No Anxiety	6	No Stress	No	No	4.4	100	70	6.1	0.9	4.09	1.6	No	No	No	No	No	No	0	0
962	75.778	1_Johor	SMK SEG HWA	46	Female	Indian	Degree	Single	Yes	No	Low	600	sedentary	>=2	<3	Inadequate	6.5	< 7 hrs	93	Central obese	4	No Depression	8	Anxiety	14	Stress	No	No	5	138	93	5.6	1.1	3.7	1.4	No	No	No	No	No	No	0	0
963	75.778	1_Johor	SMK SEG HWA	26	Female	Malay	Degree	Single	Yes	No	Moderate	300	No Sedentary	<2	<3	Inadequate	5.5	< 7 hrs	71	No central obese	18	Depression	6	No Anxiety	22	Stress	No	No	4.8	109	67	4.8	1.1	2.7	1.6	No	No	No	No	No	No	0	0
964	422.727	1_Johor	SMK DATO' IBRAHIM MAJID	38	Female	Malay	Degree	Married	Yes	No	Low	120	No Sedentary	<2	<3	Inadequate	5	< 7 hrs	65	No central obese	16	Depression	22	Anxiety	22	Stress	No	No	5.5	98	67	6.1	1.5	3.82	1.6	No	No	No	No	No	Yes	0	0
965	422.727	1_Johor	SMK DATO' IBRAHIM MAJID	31	Female	Malay	Degree	Married	Yes	No	Low	90	No Sedentary	<2	<3	Inadequate	8.5	7 hrs and above	67	No central obese	2	No Depression	4	No Anxiety	4	No Stress	No	No	4.8	107	68	3.9	0.7	2.18	1.4	No	No	No	No	No	No	0	0
966	422.727	1_Johor	SMK DATO' IBRAHIM MAJID	47	Male	Malay	Degree	Married	No	No	Moderate	4	No Sedentary	<2	<3	Inadequate	5.5	< 7 hrs	92	Central obese	20	Depression	20	Anxiety	20	Stress	No	No	4.9	129	82	5.2	0.9	3.59	1.2	No	No	No	No	No	Yes	0	0
967	422.727	1_Johor	SMK DATO' IBRAHIM MAJID	50	Female	Malay	Degree	Married	Yes	No	Low	167	No Sedentary	>=2	<3	Inadequate	5	< 7 hrs	76	No central obese	8	No Depression	4	No Anxiety	8	No Stress	No	No	5.4	121	66	4.4	0.6	2.83	1.3	No	No	No	No	No	Yes	0	0
968	422.727	1_Johor	SMK DATO' IBRAHIM MAJID	42	Male	Malay	Degree	Married	Yes	No	High	420	No Sedentary	<2	<3	Inadequate	7	7 hrs and above	77	No central obese	2	No Depression	0	No Anxiety	8	No Stress	Yes	No	4.5	110	70	5.8	1.2	4.06	1.2	No	No	No	No	No	No	0	0
969	422.727	1_Johor	SMK DATO' IBRAHIM MAJID	44	Female	Malay	Diploma and below	Single	No	No	Moderate	207	No Sedentary	<2	<3	Inadequate	5.5	< 7 hrs	79	No central obese	14	Depression	8	Anxiety	8	No Stress	No	No	4.6	147	95	4.6	1.3	3.01	1	No	No	No	No	No	No	0	0
970	422.727	1_Johor	SMK DATO' IBRAHIM MAJID	52	Female	Malay	Degree	Married	No	No	Low	60	No Sedentary	<2	<3	Inadequate	6	< 7 hrs	73	No central obese	4	No Depression	0	No Anxiety	2	No Stress	No	No	5.4	114	65	6.3	1.5	4.32	1.3	No	No	No	No	No	No	0	0
972	422.727	1_Johor	SMK DATO' IBRAHIM MAJID	38	Female	Malay	Degree	Married	No	No	Low	179	No Sedentary	<2	>=3	Inadequate	6	< 7 hrs	80	Central obese	12	Depression	6	No Anxiety	8	No Stress	No	No	5.7	122	66	4.8	1	3.25	1.1	No	Yes	No	No	No	No	1	0
973	375.706	1_Johor	SMK PASIR PUTIH	51	Female	Malay	Degree	Married	No	No	High	120	No Sedentary	<2	<3	Inadequate	6.5	< 7 hrs	81	Central obese	16	Depression	22	Anxiety	18	Stress	No	No	7.1	137	82	4.4	0.9	2.89	1.1	No	Yes	No	No	Yes	Yes		1
974	375.706	1_Johor	SMK PASIR PUTIH	36	Female	Malay	Master and above	Married	Yes	Yes	High	120	No Sedentary	<2	<3	Inadequate	6	< 7 hrs	81	Central obese	2	No Depression	8	Anxiety	4	No Stress	No	No	4.3	122	71	4.8	0.7	2.78	1.7	No	No	No	No	No	No	0	0
976	375.706	1_Johor	SMK PASIR PUTIH	49	Female	Malay	Master and above	Married	Yes	No	High	120	No Sedentary	>=2	>=3	Adequate	6.5	< 7 hrs	74	No central obese	2	No Depression	2	No Anxiety	2	No Stress	No	No	4.6	132	85	5.5	1.2	3.56	1.4	No	No	No	No	No	No	0	0
977	375.706	1_Johor	SMK PASIR PUTIH	42	Female	Malay	Degree	Married	No	No	Low	480	No Sedentary	<2	<3	Inadequate	5.5	< 7 hrs	66	No central obese	2	No Depression	0	No Anxiety	0	No Stress	No	No	5	124	74.7115	4	0.5	2.07	1.7	No	No	No	No	No	No	0	0
980	375.706	1_Johor	SMK PASIR PUTIH	26	Female	Malay	Degree	Single	No	No	Low	176	No Sedentary	<2	<3	Inadequate	5	< 7 hrs	61	No central obese	0	No Depression	8	Anxiety	4	No Stress	No	No	4.3	102	63	5.5	0.5	3.17	2.1	No	No	No	No	No	No	0	0
981	375.706	1_Johor	SMK PASIR PUTIH	46	Female	Malay	Master and above	Married	Yes	No	Low	20	No Sedentary	<2	<3	Inadequate	5	< 7 hrs	81	Central obese	8	No Depression	16	Anxiety	16	Stress	No	No	5.4	117	76	4.8	1	2.95	1.4	No	No	No	No	No	No	0	0
982	375.706	1_Johor	SMK PASIR PUTIH	27	Female	Malay	Degree	Married	No	No	High	60	No Sedentary	<2	<3	Inadequate	6.5	< 7 hrs	99	Central obese	2	No Depression	6	No Anxiety	12	No Stress	No	No	4.9	134	86	4.6	1.4	2.76	1.2	No	No	No	No	No	No	0	0
985	375.706	1_Johor	SMK PASIR PUTIH	29	Female	Indian	Degree	Single	Yes	No	Low	240	No Sedentary	<2	<3	Inadequate	6	< 7 hrs	86	Central obese	8	No Depression	10	Anxiety	18	Stress	No	No	4.7	110	65	5.1	1	3.65	1	No	No	No	No	No	No	0	0
986	375.706	1_Johor	SMK PASIR PUTIH	46	Female	Malay	Degree	Married	No	No	High	120	No Sedentary	<2	<3	Inadequate	6	< 7 hrs	71	No central obese	4	No Depression	14	Anxiety	12	No Stress	No	No	4.3	108	65	5.2	1.7	3.23	1.2	No	No	No	No	No	No	0	0
988	375.706	1_Johor	SMK PASIR PUTIH	46	Female	Malay	Degree	Married	Yes	No	Low	238	No Sedentary	<2	<3	Inadequate	7.5	7 hrs and above	92	Central obese	20	Depression	18	Anxiety	28	Stress	No	No	5.9	139	89	5.4	1	3.25	1.7	No	Yes	No	No	Yes	No	1	0
989	375.706	1_Johor	SMK PASIR PUTIH	36	Female	Malay	Degree	Married	Yes	No	Low	217	No Sedentary	<2	>=3	Inadequate	5.5	< 7 hrs	63	No central obese	12	Depression	8	Anxiety	18	Stress	No	No	5	129	70	4.7	0.6	2.83	1.6	No	No	No	No	No	No	0	0
990	375.706	1_Johor	SMK PASIR PUTIH	31	Female	Malay	Degree	Married	Yes	No	Low	157	No Sedentary	<2	<3	Inadequate	6.5	< 7 hrs	77	No central obese	10	Depression	8	Anxiety	16	Stress	No	No	5.3	122	69	6.1	0.7	3.88	1.9	No	No	No	No	No	No	0	0
991	375.706	1_Johor	SMK PASIR PUTIH	30	Female	Malay	Degree	Married	Yes	No	Low	330	No Sedentary	<2	<3	Inadequate	6	< 7 hrs	85	Central obese	16	Depression	16	Anxiety	16	Stress	No	No	5.3	119	76	6.7	1.7	4.53	1.4	No	No	No	No	No	No	0	0
992	375.706	1_Johor	SMK PASIR PUTIH	29	Female	Malay	Degree	Single	No	No	Low	40	No Sedentary	<2	<3	Inadequate	7	7 hrs and above	64	No central obese	8	No Depression	2	No Anxiety	12	No Stress	No	No	4.5	114	71	5.1	0.9	3.09	1.6	No	No	No	No	No	No	0	0
993	375.706	1_Johor	SMK PASIR PUTIH	26	Female	Malay	Degree	Married	No	No	High	60	No Sedentary	<2	<3	Inadequate	4.5	< 7 hrs	72	No central obese	12	Depression	16	Anxiety	18	Stress	No	No	5.3	127	67	5.2	1.1	3.3	1.4	No	No	No	No	No	No	0	0
994	375.706	1_Johor	SMK PASIR PUTIH	32	Female	Malay	Degree	Married	Yes	No	Low	240	No Sedentary	<2	<3	Inadequate	6	< 7 hrs	87	Central obese	4	No Depression	18	Anxiety	20	Stress	No	No	5.4	120	82	5.7	1	4.05	1.2	No	No	No	No	No	No	0	0
995	375.706	1_Johor	SMK PASIR PUTIH	29	Female	Malay	Master and above	Single	Yes	No	Low	300	No Sedentary	>=2	<3	Inadequate	6.5	< 7 hrs	64	No central obese	4	No Depression	6	No Anxiety	14	Stress	No	No	4.7	105	70	3.9	0.7	2.48	1.1	No	No	No	No	No	No	0	0
996	138.596	1_Johor	SMK IMPIAN EMAS	45	Male	Malay	Degree	Married	No	No	Moderate	196	No Sedentary	>=2	>=3	Adequate	6	< 7 hrs	79	No central obese	0	No Depression	2	No Anxiety	0	No Stress	No	No	7.03269	144.885	102	6.3	1.4	4.16	1.5	Yes	No	Yes	No	Yes	No		1
997	138.596	1_Johor	SMK IMPIAN EMAS	36	Male	Chinese	Degree	Married	No	No	Low	60	No Sedentary	<2	<3	Inadequate	7.5	7 hrs and above	63	No central obese	4	No Depression	2	No Anxiety	10	No Stress	No	No	4.5	121	78	5.2	0.7	2.98	1.9	No	No	No	No	No	No	0	0
998	138.596	1_Johor	SMK IMPIAN EMAS	48	Male	Malay	Degree	Married	Yes	No	Moderate	120	No Sedentary	<2	<3	Inadequate	5	< 7 hrs	108	Central obese	4	No Depression	6	No Anxiety	10	No Stress	No	No	4.9	127	74	5.2	0.5	3.27	1.7	No	No	No	No	No	No	0	0
999	138.596	1_Johor	SMK IMPIAN EMAS	34	Male	Chinese	Degree	Married	Yes	No	Moderate	120	No Sedentary	<2	<3	Inadequate	7.5	7 hrs and above	96	Central obese	8	No Depression	0	No Anxiety	6	No Stress	No	No	4.7	127	78	5	1.7	2.93	1.3	No	No	No	No	No	No	0	0
1000	138.596	1_Johor	SMK IMPIAN EMAS	55	Male	Malay	Degree	Married	No	No	Low	180	No Sedentary	<2	>=3	Inadequate	8	7 hrs and above	76	No central obese	0	No Depression	2	No Anxiety	4	No Stress	No	No	5.6	126	62	8.3	1.2	5.96	1.8	No	Yes	No	No	No	No	1	0
1001	138.596	1_Johor	SMK IMPIAN EMAS	42	Male	Malay	Degree	Married	No	No	Moderate	120	No Sedentary	<2	<3	Inadequate	6	< 7 hrs	97	Central obese	2	No Depression	4	No Anxiety	8	No Stress	No	No	6.2	105	61	5.6	0.9	3.89	1.3	No	Yes	No	No	No	No		1
1002	138.596	1_Johor	SMK IMPIAN EMAS	31	Male	Malay	Degree	Single	No	No	Low	171	No Sedentary	<2	<3	Inadequate	6	< 7 hrs	94	Central obese	14	Depression	14	Anxiety	14	Stress	No	No	4.7	125	69	4.8	1.2	3.16	1.1	No	No	No	No	No	No	0	0
1003	138.596	1_Johor	SMK IMPIAN EMAS	39	Male	Malay	Degree	Married	No	No	Moderate	120	No Sedentary	<2	<3	Inadequate	5.5	< 7 hrs	83	No central obese	2	No Depression	6	No Anxiety	6	No Stress	No	No	4.9	127	78	5.7	1.1	3.9	1.3	No	No	No	No	No	No	0	0
1004	138.596	1_Johor	SMK IMPIAN EMAS	41	Male	Indian	Degree	Married	Yes	No	Low	197	No Sedentary	<2	<3	Inadequate	8.5	7 hrs and above	80	No central obese	2	No Depression	4	No Anxiety	4	No Stress	No	No	5.7	122	73	4.9	1	3.35	1.1	No	Yes	No	No	No	No	1	0
1005	138.596	1_Johor	SMK IMPIAN EMAS	30	Male	Malay	Degree	Married	Yes	No	Moderate	30	No Sedentary	<2	<3	Inadequate	8.5	7 hrs and above	88	No central obese	8	No Depression	8	Anxiety	14	Stress	No	No	4.8	124	76	4.1	0.7	2.08	1.7	No	No	No	No	No	No	0	0
1006	138.596	1_Johor	SMK IMPIAN EMAS	34	Male	Indian	Degree	Married	No	No	High	180	No Sedentary	<2	<3	Inadequate	6.5	< 7 hrs	89	No central obese	14	Depression	14	Anxiety	14	Stress	No	No	5.6	117	76	6.2	1.2	4.76	0.9	No	Yes	No	No	No	No	1	0
1007	138.596	1_Johor	SMK IMPIAN EMAS	53	Male	Chinese	Degree	Married	Yes	No	Moderate	300	No Sedentary	<2	<3	Inadequate	6.5	< 7 hrs	75	No central obese	14	Depression	14	Anxiety	14	Stress	No	No	5.3	113	63	6.1	1.7	3.83	1.5	No	No	No	No	No	Yes	0	0
1008	138.596	1_Johor	SMK IMPIAN EMAS	34	Male	Malay	Degree	Married	Yes	No	Low	180	No Sedentary	<2	<3	Inadequate	7.5	7 hrs and above	74	No central obese	14	Depression	14	Anxiety	14	Stress	No	No	5.3	115	75	4.3	0.7	1.98	2	No	No	No	No	No	No	0	0
1009	138.596	1_Johor	SMK IMPIAN EMAS	29	Male	Malay	Degree	Married	Yes	No	Moderate	60	No Sedentary	<2	<3	Inadequate	7.5	7 hrs and above	85	No central obese	2	No Depression	4	No Anxiety	4	No Stress	No	No	4.1	116	74	7	1.7	4.63	1.6	No	No	No	No	No	No	0	0
1010	138.596	1_Johor	SMK IMPIAN EMAS	38	Male	Malay	Degree	Married	Yes	No	Low	162	No Sedentary	<2	<3	Inadequate	5	< 7 hrs	84	No central obese	0	No Depression	2	No Anxiety	2	No Stress	No	No	4.9	106	72	7.5	2.4	5.31	1.1	No	No	No	No	No	Yes	0	0
1011	138.596	1_Johor	SMK IMPIAN EMAS	29	Male	Malay	Degree	Married	No	No	High	180	No Sedentary	<2	<3	Inadequate	7.5	7 hrs and above	97	Central obese	2	No Depression	10	Anxiety	10	No Stress	No	No	4.8	120	73	4.3	0.6	2.63	1.4	No	No	No	No	No	No	0	0
1012	138.596	1_Johor	SMK IMPIAN EMAS	47	Male	Chinese	Degree	Married	Yes	No	Low	720	sedentary	<2	<3	Inadequate	6.5	< 7 hrs	81	No central obese	8	No Depression	8	Anxiety	10	No Stress	No	No	4.6	112	74	4.1	1.2	2.36	1.2	No	No	No	No	No	No	0	0
1013	138.596	1_Johor	SMK IMPIAN EMAS	47	Female	Malay	Degree	Married	No	No	Low	160	No Sedentary	<2	>=3	Inadequate	6	< 7 hrs	74	No central obese	0	No Depression	0	No Anxiety	2	No Stress	No	No	15.1	146	80	6.3	0.9	3.89	2	No	Yes	No	No	No	No		1
1014	138.596	1_Johor	SMK IMPIAN EMAS	33	Male	Malay	Degree	Married	Yes	No	Low	155	No Sedentary	<2	<3	Inadequate	7	7 hrs and above	82	No central obese	6	No Depression	6	No Anxiety	12	No Stress	No	No	4.8	113	73	4.2	0.5	2.37	1.6	No	No	No	No	No	No	0	0
1015	138.596	1_Johor	SMK IMPIAN EMAS	33	Male	Malay	Degree	Married	No	No	Moderate	219	No Sedentary	<2	<3	Inadequate	6.5	< 7 hrs	72	No central obese	8	No Depression	6	No Anxiety	24	Stress	No	No	4.8	118	68	5.5	1.1	3.6	1.4	No	No	No	No	No	No	0	0
1016	138.596	1_Johor	SMK IMPIAN EMAS	32	Female	Malay	Degree	Married	No	No	High	180	No Sedentary	<2	<3	Inadequate	4.5	< 7 hrs	92	Central obese	14	Depression	12	Anxiety	12	No Stress	No	No	4.6	96	71.75	4	0.6	2.43	1.3	No	No	No	No	No	No	0	0
1017	138.596	1_Johor	SMK IMPIAN EMAS	32	Male	Malay	Diploma and below	Married	No	No	Low	120	No Sedentary	<2	<3	Inadequate	5	< 7 hrs	80	No central obese	4	No Depression	10	Anxiety	10	No Stress	No	No	4.9	113	70	4.7	0.6	3.33	1.1	No	No	No	No	No	No	0	0
1018	138.596	1_Johor	SMK IMPIAN EMAS	50	Male	Malay	Degree	Married	No	No	Moderate	300	No Sedentary	<2	<3	Inadequate	5.72885	< 7 hrs	78	No central obese	0	No Depression	1	No Anxiety	2	No Stress	No	No	4.8	116	66	6.2	0.9	4.09	1.7	No	No	No	No	No	No	0	0
1019	138.596	1_Johor	SMK IMPIAN EMAS	36	Male	Malay	Degree	Married	Yes	No	Low	199	No Sedentary	<2	<3	Inadequate	7.5	7 hrs and above	76	No central obese	8	No Depression	26	Anxiety	26	Stress	No	No	4.5	107	72.7115	6.9	0.7	3.88	1.57327	No	No	No	No	No	Yes	0	0
1020	138.596	1_Johor	SMK IMPIAN EMAS	34	Male	Malay	Degree	Married	No	No	High	152	No Sedentary	<2	<3	Inadequate	7	7 hrs and above	84	No central obese	22	Depression	6	No Anxiety	22	Stress	No	No	4.5	122	64	5	0.4	3.12	1.7	No	No	No	No	No	No	0	0
1021	138.596	1_Johor	SMK IMPIAN EMAS	29	Male	Malay	Degree	Married	Yes	No	High	480	No Sedentary	<2	<3	Inadequate	6	< 7 hrs	71	No central obese	4	No Depression	8	Anxiety	12	No Stress	No	No	4.8	117	74	4.5	0.7	2.48	1.7	No	No	No	No	No	No	0	0
1022	138.596	1_Johor	SMK IMPIAN EMAS	40	Male	Malay	Degree	Married	Yes	No	Low	180	No Sedentary	<2	<3	Inadequate	5.5	< 7 hrs	90	Central obese	14	Depression	14	Anxiety	14	Stress	No	No	4.4	117	82	5.8	0.7	3.88	1.6	No	No	No	No	No	No	0	0
1024	138.596	1_Johor	SMK IMPIAN EMAS	35	Male	Malay	Degree	Married	Yes	No	High	480	No Sedentary	<2	<3	Inadequate	7	7 hrs and above	80	No central obese	2	No Depression	2	No Anxiety	2	No Stress	No	No	4.5	119	81	5	0.9	2.99	1.6	No	No	No	No	No	No	0	0
1025	138.596	1_Johor	SMK IMPIAN EMAS	47	Male	Malay	Degree	Married	Yes	No	Moderate	60	No Sedentary	<2	<3	Inadequate	5	< 7 hrs	91	Central obese	6	No Depression	6	No Anxiety	6	No Stress	No	No	5.3	142	82	4.9	0.7	2.58	2	No	No	No	No	No	No	0	0
1026	138.596	1_Johor	SMK IMPIAN EMAS	30	Male	Chinese	Degree	Married	Yes	No	Low	300	No Sedentary	<2	<3	Inadequate	7	7 hrs and above	71	No central obese	2	No Depression	8	Anxiety	14	Stress	No	No	4.7	104	72	4.4	1	2.25	1.7	No	No	No	No	No	No	0	0
1027	138.596	1_Johor	SMK IMPIAN EMAS	27	Male	Malay	Degree	Married	Yes	No	Moderate	120	No Sedentary	<2	>=3	Inadequate	7	7 hrs and above	91	Central obese	0	No Depression	12	Anxiety	6	No Stress	No	No	4.3	95	71.5192	4.6	0.6	2.63	1.7	No	No	No	No	No	No	0	0
1028	138.596	1_Johor	SMK IMPIAN EMAS	33	Male	Malay	Degree	Married	No	No	Low	141	No Sedentary	<2	<3	Inadequate	7.5	7 hrs and above	74	No central obese	2	No Depression	8	Anxiety	9	No Stress	No	No	5.3	119	93	6.1	1	4.25	1.4	No	No	No	No	No	No	0	0
1029	138.596	1_Johor	SMK IMPIAN EMAS	40	Male	Malay	Degree	Married	Yes	No	Low	30	No Sedentary	<2	>=3	Inadequate	6.5	< 7 hrs	76	No central obese	14	Depression	14	Anxiety	14	Stress	No	No	4.4	126	81	5.8	0.6	3.73	1.8	No	No	No	No	No	No	0	0
1030	138.596	1_Johor	SMK IMPIAN EMAS	37	Male	Indian	Degree	Married	No	No	Moderate	120	No Sedentary	<2	<3	Inadequate	7	7 hrs and above	80	No central obese	4	No Depression	10	Anxiety	12	No Stress	No	No	5.4	93	60	4.9	1.1	3.1	1.3	No	No	No	No	No	No	0	0
1031	138.596	1_Johor	SMK IMPIAN EMAS	39	Male	Malay	Diploma and below	Married	Yes	No	Moderate	181	No Sedentary	<2	<3	Inadequate	5.5	< 7 hrs	106	Central obese	8	No Depression	8	Anxiety	10	No Stress	No	No	5.2	160	91	5.2	1	3.25	1.5	No	No	No	No	No	No	0	0
1032	138.596	1_Johor	SMK IMPIAN EMAS	41	Male	Malay	Degree	Married	Yes	No	Low	60	No Sedentary	<2	<3	Inadequate	6.5	< 7 hrs	93	Central obese	0	No Depression	2	No Anxiety	8	No Stress	No	No	4.6	130	79	4.2	0.7	2.98	0.9	No	No	No	No	No	No	0	0
1033	138.596	1_Johor	SMK IMPIAN EMAS	28	Male	Indian	Degree	Divorced/Widowed	No	No	High	240	No Sedentary	<2	<3	Inadequate	6.4851	< 7 hrs	86	No central obese	2	No Depression	14	Anxiety	10	No Stress	No	No	4.7	116	75	4.8	0.8	3.14	1.3	No	No	No	No	No	No	0	0
1034	138.596	1_Johor	SMK IMPIAN EMAS	57	Male	Malay	Degree	Married	No	No	High	140	No Sedentary	<2	<3	Inadequate	6.16106	< 7 hrs	87	No central obese	0	No Depression	4	No Anxiety	2	No Stress	No	No	4.8	96	59	4.3	0.7	2.78	1.2	No	No	No	No	No	No	0	0
1035	138.596	1_Johor	SMK IMPIAN EMAS	39	Male	Malay	Degree	Married	Yes	No	Moderate	60	No Sedentary	<2	<3	Inadequate	7	7 hrs and above	84	No central obese	8	No Depression	20	Anxiety	22	Stress	No	No	5.2	107	69	6.7	1.1	5	1.2	No	No	No	No	No	No	0	0
1036	138.596	1_Johor	SMK IMPIAN EMAS	46	Male	Malay	Master and above	Married	Yes	No	Low	168	No Sedentary	<2	<3	Inadequate	6.05673	< 7 hrs	85	No central obese	0	No Depression	0	No Anxiety	0	No Stress	No	No	4.8	122	73	5.8	1	3.85	1.5	No	No	No	No	No	No	0	0
1037	138.596	1_Johor	SMK IMPIAN EMAS	45	Male	Malay	Degree	Married	No	No	Moderate	120	No Sedentary	<2	<3	Inadequate	5.5	< 7 hrs	90	Central obese	1	No Depression	3	No Anxiety	3	No Stress	Yes	No	5.4	121	80	5.9	1.1	4.1	1.3	No	No	No	No	No	No	0	0
1038	138.596	1_Johor	SMK IMPIAN EMAS	32	Male	Malay	Master and above	Single	Yes	No	Low	90	No Sedentary	<2	<3	Inadequate	5.5	< 7 hrs	72	No central obese	16	Depression	10	Anxiety	14	Stress	No	No	5.1	94	69.8654	5.6	0.7	3.58	1.7	No	No	No	No	No	No	0	0
1039	138.596	1_Johor	SMK IMPIAN EMAS	39	Male	Malay	Master and above	Married	No	No	Moderate	120	No Sedentary	<2	<3	Inadequate	5.5	< 7 hrs	79	No central obese	2	No Depression	2	No Anxiety	0	No Stress	No	No	4.7	100	59	6.4	0.8	4.04	2	No	No	No	No	No	No	0	0
1040	138.596	1_Johor	SMK IMPIAN EMAS	33	Male	Malay	Degree	Married	No	No	Low	180	No Sedentary	<2	<3	Inadequate	6.5	< 7 hrs	69	No central obese	2	No Depression	6	No Anxiety	0	No Stress	No	No	4.7	101	63	5.4	0.6	3.53	1.6	No	No	No	No	No	No	0	0
1041	138.596	1_Johor	SMK IMPIAN EMAS	31	Male	Malay	Degree	Married	Yes	No	Low	218	No Sedentary	<2	>=3	Inadequate	7	7 hrs and above	79	No central obese	4	No Depression	6	No Anxiety	14	Stress	No	No	4.3	109	72	5.8	1.1	3.9	1.4	No	No	No	No	No	No	0	0
1042	138.596	1_Johor	SMK IMPIAN EMAS	37	Male	Indian	Degree	Married	No	No	Low	120	No Sedentary	>=2	<3	Inadequate	8	7 hrs and above	81	No central obese	0	No Depression	0	No Anxiety	2	No Stress	No	No	4.7	91	71.4423	3.9	1.2	2.56	0.8	No	No	No	No	No	No	0	0
1044	138.596	1_Johor	SMK IMPIAN EMAS	37	Male	Malay	Degree	Married	Yes	No	High	240	No Sedentary	<2	<3	Inadequate	7	7 hrs and above	83	No central obese	8	No Depression	8	Anxiety	14	Stress	No	No	4.4	125	67	6.3	1.5	4.42	1.2	No	No	No	No	No	No	0	0
1045	138.596	1_Johor	SMK IMPIAN EMAS	27	Male	Malay	Degree	Single	No	No	Moderate	780	sedentary	<2	<3	Inadequate	6.5	< 7 hrs	71	No central obese	6	No Depression	10	Anxiety	10	No Stress	No	No	4.6	103	63	4.6	0.5	2.77	1.6	No	No	No	No	No	No	0	0
1046	138.596	1_Johor	SMK IMPIAN EMAS	27	Male	Malay	Degree	Married	Yes	No	High	171	No Sedentary	<2	<3	Inadequate	7.5	7 hrs and above	72	No central obese	10	Depression	8	Anxiety	10	No Stress	No	No	4.6	121	69	6.1	1.1	4.4	1.2	No	No	No	No	No	No	0	0
1047	181.169	1_Johor	SMK SERI INTAN	28	Male	Malay	Degree	Married	Yes	No	Low	120	No Sedentary	<2	<3	Inadequate	5	< 7 hrs	81	No central obese	0	No Depression	6	No Anxiety	4	No Stress	No	No	4.6	116	65	4.3	0.7	2.82	1.14	No	No	No	No	No	No	0	0
1048	181.169	1_Johor	SMK SERI INTAN	42	Male	Malay	Degree	Married	No	No	High	420	No Sedentary	>=2	<3	Inadequate	7.5	7 hrs and above	94	Central obese	4	No Depression	10	Anxiety	6	No Stress	No	No	6.3	146	88	6.3	1.5	4.36	1.3	No	Yes	No	No	No	No		1
1049	181.169	1_Johor	SMK SERI INTAN	41	Male	Malay	Degree	Married	Yes	No	Low	190	No Sedentary	>=2	>=3	Adequate	6.5	< 7 hrs	79.5	No central obese	10	Depression	14	Anxiety	16	Stress	No	No	5.5	131	78	5.4	1.2	3.48	1.33	No	No	No	No	No	No	0	0
1050	181.169	1_Johor	SMK SERI INTAN	54	Male	Malay	Degree	Married	No	No	Moderate	207	No Sedentary	>=2	<3	Inadequate	5.5	< 7 hrs	115	Central obese	0	No Depression	0	No Anxiety	2	No Stress	No	No	7.5	145	85	6.2	1.76731	3.75	0.89	No	Yes	No	No	No	No		1
1051	181.169	1_Johor	SMK SERI INTAN	48	Male	Malay	Degree	Married	Yes	No	Low	120	No Sedentary	>=2	<3	Inadequate	7	7 hrs and above	79	No central obese	0	No Depression	10	Anxiety	4	No Stress	No	No	4.9	130	80	3.8	1.8	1.88	1.12	No	No	No	No	Yes	Yes	0	0
1052	181.169	1_Johor	SMK SERI INTAN	32	Male	Malay	Degree	Married	Yes	No	Low	181	No Sedentary	>=2	<3	Inadequate	4.5	< 7 hrs	104	Central obese	2	No Depression	2	No Anxiety	10	No Stress	No	No	4.7	134	84	5.9	1.57308	3.95327	1.07	No	No	No	No	No	No	0	0
1053	181.169	1_Johor	SMK SERI INTAN	43	Male	Malay	Degree	Married	No	No	High	120	No Sedentary	<2	<3	Inadequate	6.5	< 7 hrs	84	No central obese	2	No Depression	0	No Anxiety	2	No Stress	No	No	7.1	119	69	5.4	1	3.84	1.12	No	Yes	No	No	No	No		1
1054	181.169	1_Johor	SMK SERI INTAN	33	Male	Malay	Degree	Married	Yes	No	Moderate	120	No Sedentary	<2	<3	Inadequate	7	7 hrs and above	89	No central obese	6	No Depression	6	No Anxiety	12	No Stress	No	No	5.4	125	68	4.3	1	2.48	1.31	No	No	No	No	No	No	0	0
1055	181.169	1_Johor	SMK SERI INTAN	54	Male	Malay	Degree	Married	No	No	Low	60	No Sedentary	<2	<3	Inadequate	6.5	< 7 hrs	70	No central obese	16	Depression	18	Anxiety	22	Stress	No	No	4.5	143	79	7.5	1	4.49	1.46173	No	No	No	No	No	No	0	0
1056	181.169	1_Johor	SMK SERI INTAN	27	Male	Malay	Degree	Married	No	No	Moderate	30	No Sedentary	>=2	>=3	Adequate	7.5	7 hrs and above	75	No central obese	0	No Depression	2	No Anxiety	0	No Stress	No	No	4.8	117	64	5.1	1.2	3.07	1.5	No	No	No	No	No	No	0	0
1057	181.169	1_Johor	SMK SERI INTAN	42	Male	Malay	Degree	Married	Yes	No	High	240	No Sedentary	<2	<3	Inadequate	5	< 7 hrs	96	Central obese	10	Depression	2	No Anxiety	6	No Stress	No	No	4.7	123	85	4.8	1.5	2.84	1.24	No	No	No	No	No	No	0	0
1058	181.169	1_Johor	SMK SERI INTAN	48	Male	Malay	Degree	Married	No	No	Moderate	20	No Sedentary	<2	<3	Inadequate	5	< 7 hrs	96	Central obese	14	Depression	14	Anxiety	14	Stress	No	No	4.4	138	83	4.6	1.2	2.79	1.26	No	No	No	No	No	No	0	0
1059	181.169	1_Johor	SMK SERI INTAN	26	Male	Malay	Degree	Married	Yes	No	Moderate	180	No Sedentary	<2	<3	Inadequate	7.5	7 hrs and above	71	No central obese	0	No Depression	4	No Anxiety	4	No Stress	No	No	5	104	67	5.5	1.4	3.2	1.69	No	No	No	No	No	No	0	0
1060	181.169	1_Johor	SMK SERI INTAN	38	Male	Malay	Degree	Married	Yes	No	High	180	No Sedentary	>=2	<3	Inadequate	5.5	< 7 hrs	92	Central obese	4	No Depression	16	Anxiety	10	No Stress	No	No	13.8	116	76	3.9	1.8	2.13	0.93	No	Yes	No	No	No	No		1
1061	181.169	1_Johor	SMK SERI INTAN	42	Male	Malay	Degree	Married	No	No	High	90	No Sedentary	<2	<3	Inadequate	6	< 7 hrs	68	No central obese	11	Depression	8	Anxiety	16	Stress	No	No	4.6	117	67	5.2	0.7	3.19	1.74	No	No	No	No	No	No	0	0
1062	181.169	1_Johor	SMK SERI INTAN	49	Male	Malay	Degree	Married	No	No	High	300	No Sedentary	<2	>=3	Inadequate	5.5	< 7 hrs	73	No central obese	4	No Depression	0	No Anxiety	6	No Stress	No	No	4.3	134	78	5.6	0.7	3.61	1.63	No	No	No	No	No	No	0	0
1063	181.169	1_Johor	SMK SERI INTAN	45	Male	Malay	Degree	Married	Yes	No	Moderate	120	No Sedentary	<2	<3	Inadequate	6	< 7 hrs	88	No central obese	2	No Depression	8	Anxiety	10	No Stress	Yes	No	5.2	137	93	4.6	2.4	2.59	0.92	No	No	No	No	No	No	0	0
1064	181.169	1_Johor	SMK SERI INTAN	30	Male	Malay	Degree	Single	Yes	No	High	30	No Sedentary	<2	<3	Inadequate	5.45096	< 7 hrs	88.375	No central obese	0	No Depression	0	No Anxiety	6	No Stress	No	No	4.7	133	75	7.8	2	5.46	1.43	No	No	No	No	No	No	0	0
1065	181.169	1_Johor	SMK SERI INTAN	43	Male	Malay	Degree	Married	Yes	No	Moderate	120	No Sedentary	<2	<3	Inadequate	5.5	< 7 hrs	80	No central obese	14	Depression	18	Anxiety	14	Stress	No	No	5.7	142	83	7.4	1.9	4.79	1.7	No	Yes	No	No	No	Yes	1	0
1066	181.169	1_Johor	SMK SERI INTAN	45	Male	Indian	Degree	Married	No	No	Moderate	40	No Sedentary	<2	<3	Inadequate	6.5	< 7 hrs	105	Central obese	6	No Depression	6	No Anxiety	10	No Stress	No	No	5.1	111	68	3.8	1.2	2.25	0.96	No	No	No	No	No	Yes	0	0
1067	181.169	1_Johor	SMK SERI INTAN	35	Male	Malay	Degree	Married	Yes	No	High	600	sedentary	<2	<3	Inadequate	7.83558	7 hrs and above	84	No central obese	4	No Depression	0	No Anxiety	4	No Stress	No	No	4.3	103	67	3.9	0.7	2.48	1.07	No	No	No	No	No	No	0	0
1068	196.344	1_Johor	SMK (P) SULTAN IBRAHIM	52	Female	Malay	Master and above	Married	Yes	No	Moderate	209	No Sedentary	<2	<3	Inadequate	5	< 7 hrs	101	Central obese	4	No Depression	12	Anxiety	10	No Stress	No	No	5.9	136	91	5.7	2.6	3.32	1.2	No	Yes	No	No	Yes	Yes	1	0
1069	196.344	1_Johor	SMK (P) SULTAN IBRAHIM	36	Female	Malay	Degree	Married	No	No	High	120	No Sedentary	<2	<3	Inadequate	4.5	< 7 hrs	94	Central obese	0	No Depression	2	No Anxiety	2	No Stress	No	No	4.8	124	86	5.2	1.5	3.51	1.01	No	No	No	No	No	No	0	0
1070	196.344	1_Johor	SMK (P) SULTAN IBRAHIM	26	Female	Malay	Degree	Single	Yes	No	Moderate	180	No Sedentary	<2	<3	Inadequate	6.5	< 7 hrs	66	No central obese	18	Depression	22	Anxiety	24	Stress	No	No	5.1	119	78	4.78269	0.7	1.93	1.25	No	No	No	No	No	No	0	0
1071	196.344	1_Johor	SMK (P) SULTAN IBRAHIM	56	Female	Malay	Diploma and below	Married	No	No	Moderate	120	No Sedentary	<2	<3	Inadequate	6.5	< 7 hrs	62.5	No central obese	0	No Depression	0	No Anxiety	0	No Stress	No	No	5.2	100	68	5.6	1	3.82	1.33	No	No	No	No	No	No	0	0
1073	196.344	1_Johor	SMK (P) SULTAN IBRAHIM	29	Female	Malay	Degree	Married	Yes	No	High	240	No Sedentary	<2	<3	Inadequate	7	7 hrs and above	88.5	Central obese	6	No Depression	12	Anxiety	14	Stress	No	No	6.5	137	85	6.2	2.2	3.66	1.54	No	Yes	No	No	No	No		1
1074	196.344	1_Johor	SMK (P) SULTAN IBRAHIM	27	Female	Malay	Degree	Married	No	No	High	129	No Sedentary	>=2	<3	Inadequate	6	< 7 hrs	75	No central obese	2	No Depression	6	No Anxiety	10	No Stress	No	No	4.8	111	78	5.3	0.7	3.31	1.67	No	No	No	No	No	No	0	0
1075	196.344	1_Johor	SMK (P) SULTAN IBRAHIM	33	Female	Malay	Diploma and below	Married	No	No	Low	60	No Sedentary	<2	<3	Inadequate	7	7 hrs and above	79	No central obese	0	No Depression	8	Anxiety	10	No Stress	No	No	4.8	99	68	3.9	0.8	2.36	1.18	No	No	No	No	No	No	0	0
1076	196.344	1_Johor	SMK (P) SULTAN IBRAHIM	34	Female	Malay	Degree	Married	No	No	Low	196	No Sedentary	<2	<3	Inadequate	7	7 hrs and above	70	No central obese	18	Depression	10	Anxiety	14	Stress	No	No	4.6	102	72	4.9	0.8	3.11	1.43	No	No	No	No	No	No	0	0
1077	196.344	1_Johor	SMK (P) SULTAN IBRAHIM	27	Female	Malay	Master and above	Married	Yes	No	Moderate	240	No Sedentary	<2	<3	Inadequate	7	7 hrs and above	75	No central obese	2	No Depression	0	No Anxiety	8	No Stress	No	No	5.2	125	84	5	0.8	3.19	1.45	No	No	No	No	No	No	0	0
1078	196.344	1_Johor	SMK (P) SULTAN IBRAHIM	44	Female	Malay	Degree	Married	Yes	No	Moderate	150	No Sedentary	<2	<3	Inadequate	5	< 7 hrs	93	Central obese	18	Depression	16	Anxiety	14	Stress	No	No	4.6	121	70	4.6	0.8	2.96	1.28	No	No	No	No	No	No	0	0
1079	196.344	1_Johor	SMK (P) SULTAN IBRAHIM	35	Female	Malay	Degree	Married	Yes	No	High	179	No Sedentary	<2	<3	Inadequate	6.5	< 7 hrs	84	Central obese	2	No Depression	0	No Anxiety	8	No Stress	No	No	4.8	116	66	4.5	0.5	2.98	1.29	No	No	No	No	No	No	0	0
1080	196.344	1_Johor	SMK (P) SULTAN IBRAHIM	47	Female	Malay	Degree	Married	No	No	Moderate	60	No Sedentary	<2	>=3	Inadequate	6	< 7 hrs	94	Central obese	0	No Depression	2	No Anxiety	4	No Stress	No	No	6.2	145.288	99	4.7	1.1	3.12	1.08	No	Yes	No	No	No	No		1
1081	196.344	1_Johor	SMK (P) SULTAN IBRAHIM	45	Female	Malay	Degree	Married	Yes	No	Moderate	120	No Sedentary	<2	<3	Inadequate	5.5	< 7 hrs	85	Central obese	0	No Depression	8	Anxiety	4	No Stress	No	No	5	130	86	6.2	1.7	4.16	1.27	No	No	No	No	No	No	0	0
1082	196.344	1_Johor	SMK (P) SULTAN IBRAHIM	29	Female	Malay	Diploma and below	Married	Yes	No	Low	209	No Sedentary	<2	>=3	Inadequate	8	7 hrs and above	87	Central obese	2	No Depression	8	Anxiety	8	No Stress	No	No	5.2	136	94	4.9	1.2	2.91	1.45	No	No	No	No	No	No	0	0
1083	196.344	1_Johor	SMK (P) SULTAN IBRAHIM	25	Female	Malay	Degree	Single	No	No	High	3	No Sedentary	<2	<3	Inadequate	7	7 hrs and above	75.5	No central obese	8	No Depression	6	No Anxiety	10	No Stress	No	No	4.8	123	75	5.7	0.5	3.91	1.56	No	No	No	No	No	No	0	0
1084	196.344	1_Johor	SMK (P) SULTAN IBRAHIM	51	Male	Malay	Degree	Married	Yes	No	Moderate	150	No Sedentary	<2	<3	Inadequate	6	< 7 hrs	99	Central obese	16	Depression	14	Anxiety	22	Stress	No	No	7.1	129	86	5.8	1.6	3.72	1.35	Yes	No	Yes	No	No	Yes		1
1085	196.344	1_Johor	SMK (P) SULTAN IBRAHIM	49	Female	Other races	Master and above	Single	Yes	No	Moderate	300	No Sedentary	<2	<3	Inadequate	5.5	< 7 hrs	71.5	No central obese	14	Depression	14	Anxiety	14	Stress	No	No	5	117	92	6.1	1.6	3.97	1.4	No	No	No	No	No	No	0	0
1086	196.344	1_Johor	SMK (P) SULTAN IBRAHIM	43	Female	Malay	Diploma and below	Married	Yes	Yes	Low	187	No Sedentary	<2	<3	Inadequate	5.90481	< 7 hrs	97	Central obese	12	Depression	12	Anxiety	14	Stress	No	No	6.5	131	90	6.3	1.7	4.21	1.32	No	Yes	No	No	No	No		1
1087	196.344	1_Johor	SMK (P) SULTAN IBRAHIM	31	Female	Malay	Diploma and below	Married	No	Yes	Moderate	300	No Sedentary	<2	>=3	Inadequate	6	< 7 hrs	74	No central obese	0	No Depression	0	No Anxiety	0	No Stress	No	No	5.1	103	71	5	0.6	3.11	1.62	No	No	No	No	No	No	0	0
1088	196.344	1_Johor	SMK (P) SULTAN IBRAHIM	37	Female	Malay	Master and above	Single	No	No	Low	185	No Sedentary	<2	<3	Inadequate	8	7 hrs and above	98	Central obese	0	No Depression	10	Anxiety	10	No Stress	No	No	5.3	120	84	6.2	1.7	4.31	1.12	No	No	No	No	No	No	0	0
1089	196.344	1_Johor	SMK (P) SULTAN IBRAHIM	31	Female	Malay	Degree	Married	No	No	Moderate	191	No Sedentary	<2	<3	Inadequate	7	7 hrs and above	67	No central obese	28	Depression	26	Anxiety	28	Stress	No	No	4.1	114	79	4.8	1	3.13	1.22	No	No	No	No	No	No	0	0
1090	196.344	1_Johor	SMK (P) SULTAN IBRAHIM	45	Male	Chinese	Master and above	Married	Yes	No	Moderate	189	No Sedentary	<2	<3	Inadequate	6	< 7 hrs	99	Central obese	8	No Depression	6	No Anxiety	10	No Stress	No	Yes	5.6	118	76	4.9	1.1	3.33	1.07	No	Yes	No	No	No	Yes	1	0
1091	196.344	1_Johor	SMK (P) SULTAN IBRAHIM	34	Female	Malay	Diploma and below	Married	Yes	No	Low	199	No Sedentary	<2	<3	Inadequate	7	7 hrs and above	70.5	No central obese	0	No Depression	2	No Anxiety	2	No Stress	No	No	4.7	103	63	5	0.8	3.32	1.32	No	No	No	No	No	No	0	0
1092	196.344	1_Johor	SMK (P) SULTAN IBRAHIM	33	Female	Chinese	Degree	Married	No	No	Moderate	202	No Sedentary	<2	<3	Inadequate	7.5	7 hrs and above	64	No central obese	8	No Depression	4	No Anxiety	10	No Stress	No	No	5.2	119	75	5.1	0.7	3.23	1.55	No	No	No	No	No	No	0	0
1093	196.344	1_Johor	SMK (P) SULTAN IBRAHIM	31	Female	Malay	Master and above	Single	Yes	No	Moderate	180	No Sedentary	<2	<3	Inadequate	7.5	7 hrs and above	72.5	No central obese	10	Depression	8	Anxiety	12	No Stress	No	No	4.6	103	70.2115	3.8	1.9	1.74	1.2	No	No	No	No	No	No	0	0
1094	196.344	1_Johor	SMK (P) SULTAN IBRAHIM	53	Female	Malay	Degree	Single	No	No	Moderate	204	No Sedentary	<2	<3	Inadequate	5.5	< 7 hrs	72.5	No central obese	2	No Depression	8	Anxiety	8	No Stress	No	No	5.1	120	79	5.4	0.6	3.25	1.88	No	No	No	No	No	No	0	0
1095	196.344	1_Johor	SMK (P) SULTAN IBRAHIM	43	Female	Malay	Degree	Married	No	No	Low	180	No Sedentary	<2	>=3	Inadequate	6.5	< 7 hrs	77.5	No central obese	8	No Depression	22	Anxiety	26	Stress	No	No	4.6	107	72	4.6	0.8	2.78	1.46	No	No	No	No	No	No	0	0
1096	196.344	1_Johor	SMK (P) SULTAN IBRAHIM	47	Female	Chinese	Degree	Single	Yes	No	Low	219	No Sedentary	<2	<3	Inadequate	7	7 hrs and above	85	Central obese	0	No Depression	0	No Anxiety	8	No Stress	No	No	5.4	121	75	6.1	1.2	4.2	1.36	No	No	No	No	No	No	0	0
1097	196.344	1_Johor	SMK (P) SULTAN IBRAHIM	42	Female	Indian	Master and above	Married	No	No	Moderate	120	No Sedentary	<2	<3	Inadequate	6.5	< 7 hrs	84	Central obese	4	No Depression	4	No Anxiety	12	No Stress	No	No	5	118	73.1346	4.9	1.4	3.18	1.08	No	No	No	No	No	No	0	0
1098	196.344	1_Johor	SMK (P) SULTAN IBRAHIM	28	Female	Malay	Degree	Married	No	No	Low	360	No Sedentary	<2	<3	Inadequate	6.5	< 7 hrs	69	No central obese	14	Depression	18	Anxiety	18	Stress	No	No	4.4	122	75	6.3	2.7	3.76	1.31	No	No	No	No	No	No	0	0
1099	196.344	1_Johor	SMK (P) SULTAN IBRAHIM	31	Female	Malay	Degree	Married	Yes	Yes	Low	209	No Sedentary	<2	<3	Inadequate	6	< 7 hrs	82.5	Central obese	26	Depression	16	Anxiety	20	Stress	No	No	4.7	121	72	4.6	0.7	2.35	1.93	No	No	No	No	No	No	0	0
1100	89.099	1_Johor	SMK PARIT BETAK	50	Male	Malay	Degree	Married	No	No	Low	60	No Sedentary	<2	<3	Inadequate	5	< 7 hrs	94	Central obese	16	Depression	18	Anxiety	16	Stress	Yes	No	5.2	138	85	6.7	2.3	4.46	1.2	No	No	No	No	No	No	0	0
1101	89.099	1_Johor	SMK PARIT BETAK	29	Female	Malay	Degree	Married	Yes	Yes	Moderate	210	No Sedentary	<2	<3	Inadequate	7.5	7 hrs and above	70	No central obese	8	No Depression	10	Anxiety	8	No Stress	No	No	4.6	92	60	4	0.4	1.82	2	No	No	No	No	No	No	0	0
1102	89.099	1_Johor	SMK PARIT BETAK	35	Female	Malay	Degree	Married	No	No	Low	176	No Sedentary	<2	<3	Inadequate	6.5	< 7 hrs	79	No central obese	8	No Depression	10	Anxiety	8	No Stress	No	No	5.2	118	78	5.3	0.5	2.97	2.1	No	No	No	No	No	No	0	0
1103	89.099	1_Johor	SMK PARIT BETAK	34	Female	Malay	Degree	Married	No	No	Moderate	60	No Sedentary	<2	<3	Inadequate	5.5	< 7 hrs	62	No central obese	0	No Depression	2	No Anxiety	6	No Stress	No	No	5	119	74	3.6	0.6	1.93	1.4	No	No	No	No	No	No	0	0
1104	89.099	1_Johor	SMK PARIT BETAK	39	Female	Malay	Degree	Married	No	No	Moderate	240	No Sedentary	<2	<3	Inadequate	6.5	< 7 hrs	74	No central obese	6	No Depression	14	Anxiety	10	No Stress	No	No	5.1	107	66	5.5	1.3	3.31	1.6	No	No	No	No	No	No	0	0
1105	89.099	1_Johor	SMK PARIT BETAK	58	Female	Malay	Degree	Married	No	No	High	487	No Sedentary	<2	>=3	Inadequate	6	< 7 hrs	112	Central obese	1	No Depression	3	No Anxiety	4	No Stress	No	No	4.6	139	71	5.8	1.7	3.83	1.2	No	No	No	No	No	No	0	0
1106	89.099	1_Johor	SMK PARIT BETAK	48	Female	Malay	Degree	Married	No	No	High	188	No Sedentary	<2	<3	Inadequate	5	< 7 hrs	71	No central obese	0	No Depression	0	No Anxiety	0	No Stress	No	No	5.3	124	71	4.6	0.9	2.39	1.8	No	No	No	No	No	Yes	0	0
1107	89.099	1_Johor	SMK PARIT BETAK	40	Female	Malay	Degree	Married	No	No	Moderate	212	No Sedentary	>=2	<3	Inadequate	5.5	< 7 hrs	70	No central obese	2	No Depression	4	No Anxiety	8	No Stress	No	No	4.7	107	71	4.6	0.7	2.78	1.5	No	No	No	No	No	No	0	0
1108	89.099	1_Johor	SMK PARIT BETAK	28	Female	Malay	Degree	Married	Yes	No	Moderate	180	No Sedentary	<2	<3	Inadequate	5.5	< 7 hrs	72	No central obese	8	No Depression	12	Anxiety	14	Stress	No	No	5.1	122	78	5.5	0.6	3.03	2.2	No	No	No	No	No	No	0	0
1109	89.099	1_Johor	SMK PARIT BETAK	34	Female	Malay	Degree	Married	No	No	Low	165	No Sedentary	<2	<3	Inadequate	6.5	< 7 hrs	101	Central obese	12	Depression	8	Anxiety	12	No Stress	No	No	7.4	145	92	6.2	1.9	4.14	1.2	No	Yes	No	No	No	No		1
1110	89.099	1_Johor	SMK PARIT BETAK	49	Female	Malay	Degree	Married	Yes	No	High	172	No Sedentary	<2	<3	Inadequate	5	< 7 hrs	79	No central obese	0	No Depression	0	No Anxiety	0	No Stress	No	No	6.7	156	90	6.3	1.2	4.16	1.6	No	Yes	No	No	Yes	No		1
1111	89.099	1_Johor	SMK PARIT BETAK	48	Female	Malay	Degree	Married	No	No	Low	143	No Sedentary	<2	<3	Inadequate	5	< 7 hrs	84	Central obese	0	No Depression	0	No Anxiety	4	No Stress	No	No	6.4	158	99	4.7	0.6	3.23	1.2	No	Yes	No	No	Yes	No		1
1112	89.099	1_Johor	SMK PARIT BETAK	34	Female	Malay	Degree	Married	Yes	Yes	Moderate	165	No Sedentary	<2	<3	Inadequate	6.5	< 7 hrs	99	Central obese	12	Depression	22	Anxiety	20	Stress	No	No	9.1	123	83	5.6	1.2	3.86	1.2	Yes	No	Yes	No	No	No		1
1113	89.099	1_Johor	SMK PARIT BETAK	46	Female	Malay	Degree	Married	Yes	Yes	Low	199	No Sedentary	>=2	<3	Inadequate	5.5	< 7 hrs	91	Central obese	6	No Depression	12	Anxiety	10	No Stress	No	No	7.2	127	78	6.2	1.6	3.97	1.5	Yes	No	Yes	Yes	No	Yes		1
1114	89.099	1_Johor	SMK PARIT BETAK	25	Female	Malay	Master and above	Single	Yes	No	Low	209	No Sedentary	<2	<3	Inadequate	7	7 hrs and above	74.3135	No central obese	6	No Depression	8	Anxiety	6	No Stress	No	No	4.8	111	74	6	0.7	3.68	2	No	No	No	No	No	No	0	0
1116	158.383	1_Johor	SMK LINGGIU	45	Female	Malay	Degree	Married	No	No	Low	182	No Sedentary	<2	>=3	Inadequate	7	7 hrs and above	63.5	No central obese	6	No Depression	16	Anxiety	14	Stress	No	No	4.7	123	76	5.6	1	2.63	1.62942	No	No	No	No	No	Yes	0	0
1117	158.383	1_Johor	SMK LINGGIU	41	Female	Malay	Degree	Married	No	Yes	Low	120	No Sedentary	<2	<3	Inadequate	6.5	< 7 hrs	77	No central obese	2	No Depression	6	No Anxiety	6	No Stress	No	No	4.9	161	95	4.2	0.8	2.22	1.6	No	No	No	No	No	No	0	0
1118	158.383	1_Johor	SMK LINGGIU	31	Female	Malay	Diploma and below	Single	No	No	Low	175	No Sedentary	<2	<3	Inadequate	6.5	< 7 hrs	98	Central obese	10	Depression	10	Anxiety	10	No Stress	No	No	5.9	155	79	3.9	0.7	1.75	1.81	No	Yes	No	No	No	No	1	0
1119	158.383	1_Johor	SMK LINGGIU	38	Female	Malay	Degree	Married	No	No	Low	840	sedentary	<2	<3	Inadequate	6.5	< 7 hrs	88	Central obese	6	No Depression	6	No Anxiety	6	No Stress	No	No	4.7	122	67	5.8	0.9	3.93	1.43	No	No	No	No	No	No	0	0
1120	158.383	1_Johor	SMK LINGGIU	52	Male	Malay	Degree	Married	Yes	No	Low	258	No Sedentary	<2	<3	Inadequate	6.5	< 7 hrs	101	Central obese	4	No Depression	16	Anxiety	0	No Stress	No	No	6	147	81	4.1	1.2	2.45	1.09	No	No	Yes	Yes	Yes	Yes		1
1122	158.383	1_Johor	SMK LINGGIU	40	Female	Malay	Degree	Married	No	No	Low	219	No Sedentary	<2	<3	Inadequate	6.5	< 7 hrs	71	No central obese	10	Depression	10	Anxiety	10	No Stress	No	No	5	103	64	6.1	0.7	3.97	1.86	No	No	No	No	No	No	0	0
1123	158.383	1_Johor	SMK LINGGIU	31	Female	Malay	Degree	Married	No	No	Moderate	60	No Sedentary	<2	<3	Inadequate	5	< 7 hrs	104	Central obese	0	No Depression	0	No Anxiety	0	No Stress	No	No	4.9	144	90	5.6	2	3.6	1.09	No	No	No	No	No	No	0	0
1124	158.383	1_Johor	SMK LINGGIU	25	Male	Malay	Degree	Single	No	No	Moderate	160	No Sedentary	<2	<3	Inadequate	7	7 hrs and above	80	No central obese	20	Depression	12	Anxiety	16	Stress	No	No	4.5	144	72	4.5	0.8	2.91	1.22	No	No	No	No	No	No	0	0
1135	243.738	1_Johor	SMK DATO JAAFAR	49	Female	Chinese	Degree	Married	No	No	High	120	No Sedentary	<2	<3	Inadequate	5.5	< 7 hrs	84	Central obese	14	Depression	14	Anxiety	22	Stress	No	No	5.4	155	98	5	1	3.25	1.3	No	No	No	No	Yes	Yes	0	0
1136	243.738	1_Johor	SMK DATO JAAFAR	44	Female	Indian	Degree	Married	No	Yes	High	194	No Sedentary	>=2	<3	Inadequate	6	< 7 hrs	82	Central obese	4	No Depression	10	Anxiety	8	No Stress	No	No	4.1	127	86	7.5	1.2	4.76	2.2	No	No	No	No	No	No	0	0
1137	243.738	1_Johor	SMK DATO JAAFAR	38	Female	Malay	Degree	Married	Yes	No	Low	270	No Sedentary	<2	<3	Inadequate	5.5	< 7 hrs	63.5	No central obese	2	No Depression	6	No Anxiety	4	No Stress	No	No	5.2	110	60	6.5	0.7	3.88	2.3	No	No	No	No	No	No	0	0
1138	243.738	1_Johor	SMK DATO JAAFAR	34	Female	Malay	Degree	Married	No	No	Moderate	150	No Sedentary	<2	<3	Inadequate	6.5	< 7 hrs	86	Central obese	6	No Depression	8	Anxiety	12	No Stress	No	No	4.9	134	89	5.1	1.8	3.28	1	No	No	No	No	No	No	0	0
1139	243.738	1_Johor	SMK DATO JAAFAR	30	Female	Malay	Degree	Married	Yes	No	Moderate	120	No Sedentary	>=2	<3	Inadequate	8	7 hrs and above	75	No central obese	0	No Depression	6	No Anxiety	10	No Stress	No	No	4.7	101	68	4.7	0.4	2.72	1.8	No	No	No	No	No	No	0	0
1140	243.738	1_Johor	SMK DATO JAAFAR	40	Female	Malay	Degree	Married	No	No	Moderate	172	No Sedentary	<2	<3	Inadequate	7	7 hrs and above	78	No central obese	0	No Depression	2	No Anxiety	8	No Stress	No	No	5.4	141	94	5.4	0.7	3.38	1.7	No	No	No	No	No	No	0	0
1141	243.738	1_Johor	SMK DATO JAAFAR	40	Female	Malay	Degree	Married	Yes	No	Low	195	No Sedentary	<2	<3	Inadequate	6.5	< 7 hrs	72	No central obese	0	No Depression	8	Anxiety	6	No Stress	No	No	5.2	118	81	5.2	0.8	3.74	1.1	No	No	No	No	No	No	0	0
1142	243.738	1_Johor	SMK DATO JAAFAR	56	Male	Malay	Degree	Married	Yes	No	High	181	No Sedentary	>=2	>=3	Adequate	6	< 7 hrs	101	Central obese	0	No Depression	4	No Anxiety	0	No Stress	No	No	8	119	80	5.53462	1.3	1.61	1.2	Yes	No	Yes	Yes	Yes	Yes		1
1143	243.738	1_Johor	SMK DATO JAAFAR	41	Female	Malay	Degree	Married	No	No	Moderate	120	No Sedentary	<2	<3	Inadequate	7	7 hrs and above	77.5	No central obese	2	No Depression	6	No Anxiety	12	No Stress	No	No	4.7	119	59	6.9	1.09808	3.41	1.9	No	No	No	No	No	No	0	0
1144	243.738	1_Johor	SMK DATO JAAFAR	39	Female	Malay	Degree	Married	Yes	No	Low	30	No Sedentary	<2	<3	Inadequate	8	7 hrs and above	81	Central obese	0	No Depression	0	No Anxiety	6	No Stress	No	No	5.1	107	63	4.7	0.8	2.74	1.6	No	No	No	No	No	No	0	0
1145	243.738	1_Johor	SMK DATO JAAFAR	32	Female	Chinese	Degree	Married	Yes	No	Moderate	211	No Sedentary	<2	<3	Inadequate	8.5	7 hrs and above	76.5	No central obese	14	Depression	6	No Anxiety	16	Stress	No	No	5.1	122	75	5.4	1.2	3.76	1.1	No	No	No	No	No	No	0	0
1146	243.738	1_Johor	SMK DATO JAAFAR	31	Female	Chinese	Degree	Married	Yes	No	Moderate	180	No Sedentary	<2	<3	Inadequate	7	7 hrs and above	70	No central obese	2	No Depression	0	No Anxiety	4	No Stress	No	No	5.3	112	69	5.2	0.6	2.53	1.60692	No	No	No	No	No	No	0	0
1147	243.738	1_Johor	SMK DATO JAAFAR	31	Male	Malay	Degree	Married	Yes	No	Low	120	No Sedentary	<2	<3	Inadequate	7.5	7 hrs and above	71	No central obese	6	No Depression	12	Anxiety	12	No Stress	No	No	4.6	146	82	4.1	1.1	2	1.6	No	No	No	No	No	No	0	0
1148	243.738	1_Johor	SMK DATO JAAFAR	24	Male	Malay	Diploma and below	Single	Yes	No	Low	243	No Sedentary	<2	<3	Inadequate	7	7 hrs and above	71	No central obese	6	No Depression	8	Anxiety	8	No Stress	No	No	4.6	117	72	5.3	0.7	2.98	2	No	No	No	No	No	No	0	0
1149	243.738	1_Johor	SMK DATO JAAFAR	50	Male	Indian	Degree	Married	No	No	Moderate	180	No Sedentary	<2	<3	Inadequate	6.5	< 7 hrs	79	No central obese	10	Depression	16	Anxiety	14	Stress	No	No	5.2	110	76	4.5	0.8	2.54	1.6	No	No	No	No	No	No	0	0
1150	243.738	1_Johor	SMK DATO JAAFAR	47	Female	Indian	Degree	Married	No	No	Moderate	40	No Sedentary	>=2	>=3	Adequate	7	7 hrs and above	71	No central obese	0	No Depression	6	No Anxiety	6	No Stress	No	No	5.6	108	73	6.2	1.6	4.27	1.2	No	Yes	No	No	No	No	1	0
1151	243.738	1_Johor	SMK DATO JAAFAR	28	Female	Malay	Degree	Married	Yes	No	High	188	No Sedentary	<2	<3	Inadequate	6.5	< 7 hrs	87	Central obese	8	No Depression	10	Anxiety	14	Stress	No	No	4.4	121	68	5.1	1	2.95	1.7	No	No	No	No	No	No	0	0
1152	243.738	1_Johor	SMK DATO JAAFAR	27	Female	Malay	Degree	Married	Yes	No	Moderate	20	No Sedentary	<2	<3	Inadequate	6.5	< 7 hrs	70.5	No central obese	0	No Depression	2	No Anxiety	0	No Stress	No	No	4.4	112	70.1923	5.7	0.7	3.58	1.8	No	No	No	No	No	No	0	0
1153	243.738	1_Johor	SMK DATO JAAFAR	42	Male	Malay	Degree	Married	No	No	Moderate	60	No Sedentary	<2	<3	Inadequate	6	< 7 hrs	83	No central obese	0	No Depression	8	Anxiety	4	No Stress	No	No	5	124	78	5.6	1.2	3.86	1.2	No	No	No	No	No	No	0	0
1154	243.738	1_Johor	SMK DATO JAAFAR	28	Male	Malay	Degree	Married	Yes	No	Moderate	150	No Sedentary	<2	<3	Inadequate	5	< 7 hrs	77	No central obese	22	Depression	12	Anxiety	24	Stress	No	No	4.4	126	72	4.2	0.8	2.74	1.1	No	No	No	No	No	No	0	0
1156	243.738	1_Johor	SMK DATO JAAFAR	57	Male	Malay	Degree	Married	Yes	No	High	720	sedentary	<2	<3	Inadequate	9	7 hrs and above	95	Central obese	0	No Depression	2	No Anxiety	4	No Stress	No	No	7.46731	138	78	5.2	1.5	3.32	1.2	Yes	No	Yes	Yes	No	No		1
1157	243.738	1_Johor	SMK DATO JAAFAR	41	Female	Malay	Degree	Married	Yes	No	Low	240	No Sedentary	>=2	>=3	Adequate	6.5	< 7 hrs	72	No central obese	2	No Depression	14	Anxiety	12	No Stress	No	No	5	112	66	5.5	0.9	3.69	1.4	No	No	No	No	No	No	0	0
1158	243.738	1_Johor	SMK DATO JAAFAR	27	Female	Malay	Degree	Married	No	No	High	300	No Sedentary	>=2	<3	Inadequate	4.5	< 7 hrs	72	No central obese	2	No Depression	14	Anxiety	22	Stress	No	No	4.2	110	65	4.2	1.1	2.1	1.6	No	No	No	No	No	No	0	0
1159	243.738	1_Johor	SMK DATO JAAFAR	57	Female	Malay	Degree	Married	Yes	Yes	Low	210	No Sedentary	<2	<3	Inadequate	6	< 7 hrs	104.5	Central obese	10	Depression	10	Anxiety	14	Stress	No	No	13.1	122	80	6.7	2	4.19	1.6	Yes	No	Yes	Yes	Yes	No		1
1160	243.738	1_Johor	SMK DATO JAAFAR	40	Female	Malay	Degree	Single	No	No	Moderate	120	No Sedentary	<2	<3	Inadequate	7.5	7 hrs and above	69	No central obese	10	Depression	12	Anxiety	14	Stress	No	No	5.2	103	65	4.1	0.6	2.53	1.3	No	No	No	No	No	No	0	0
1161	243.738	1_Johor	SMK DATO JAAFAR	25	Male	Malay	Degree	Single	No	No	Low	169	No Sedentary	<2	<3	Inadequate	5	< 7 hrs	111.5	Central obese	10	Depression	12	Anxiety	14	Stress	No	No	5	122	76	4	0.9	2.69	0.9	No	No	No	No	No	No	0	0
1162	243.738	1_Johor	SMK DATO JAAFAR	54	Female	Chinese	Degree	Married	No	No	Low	30	No Sedentary	<2	<3	Inadequate	8	7 hrs and above	80	Central obese	0	No Depression	0	No Anxiety	0	No Stress	No	No	4.6	116	74.0962	5.9	1.6	3.77	1.4	No	No	No	No	No	No	0	0
1163	243.738	1_Johor	SMK DATO JAAFAR	47	Female	Chinese	Degree	Married	Yes	No	Low	60	No Sedentary	>=2	<3	Inadequate	6.5	< 7 hrs	90	Central obese	6	No Depression	6	No Anxiety	8	No Stress	No	No	5.5	114	80	6.2	2.7	3.67	1.3	No	No	No	No	No	No	0	0
1181	158.523	1_Johor	SMK JALAN KOTA TINGGI	48	Male	Malay	Degree	Married	Yes	No	Moderate	169	No Sedentary	>=2	<3	Inadequate	5	< 7 hrs	80	No central obese	0	No Depression	0	No Anxiety	4	No Stress	No	No	5.9	113	78	4.7	1.6	2.57	1.4	No	Yes	No	No	No	No	1	0
1182	158.523	1_Johor	SMK JALAN KOTA TINGGI	53	Male	Malay	Degree	Married	No	No	Low	420	No Sedentary	<2	>=3	Inadequate	5.5	< 7 hrs	88	No central obese	6	No Depression	12	Anxiety	16	Stress	No	No	5.3	133	85	7.9	1.1	4.45942	1.2	No	No	No	No	No	Yes	0	0
1183	158.523	1_Johor	SMK JALAN KOTA TINGGI	56	Female	Malay	Degree	Married	No	No	High	250	No Sedentary	>=2	<3	Inadequate	8	7 hrs and above	66.5	No central obese	0	No Depression	0	No Anxiety	0	No Stress	No	No	5.5	118	73	5.9	0.9	3.59	1.9	No	No	No	No	No	No	0	0
1186	158.523	1_Johor	SMK JALAN KOTA TINGGI	50	Male	Malay	Degree	Married	No	No	Low	190	No Sedentary	<2	<3	Inadequate	6	< 7 hrs	87	No central obese	16	Depression	12	Anxiety	14	Stress	No	No	4.7	119	62	6.6	1.55962	3.9	1.2	No	No	No	No	No	Yes	0	0
1188	158.523	1_Johor	SMK JALAN KOTA TINGGI	45	Male	Malay	Degree	Married	Yes	No	High	510	No Sedentary	<2	<3	Inadequate	5.5	< 7 hrs	109	Central obese	10	Depression	6	No Anxiety	10	No Stress	No	No	5	117	74	4.9	1	3.05	1.4	No	No	No	No	No	No	0	0
1189	158.523	1_Johor	SMK JALAN KOTA TINGGI	55	Female	Malay	Master and above	Married	Yes	No	High	180	No Sedentary	<2	<3	Inadequate	6.5	< 7 hrs	85	Central obese	14	Depression	12	Anxiety	14	Stress	No	No	6.1	124	75	4	1.9	2.14	1	No	No	Yes	Yes	Yes	Yes		1
1190	158.523	1_Johor	SMK JALAN KOTA TINGGI	40	Female	Malay	Degree	Married	Yes	No	Low	148	No Sedentary	<2	<3	Inadequate	5.5	< 7 hrs	85	Central obese	8	No Depression	16	Anxiety	8	No Stress	No	No	5.3	124	76	4.7	1.6	2.77	1.2	No	No	No	No	Yes	No	0	0
1191	158.523	1_Johor	SMK JALAN KOTA TINGGI	55	Male	Malay	Degree	Married	No	No	Low	120	No Sedentary	<2	<3	Inadequate	6.5	< 7 hrs	69	No central obese	6	No Depression	14	Anxiety	8	No Stress	No	No	4.8	118	77	3.8	0.6	2.13	1.4	No	No	No	No	No	No	0	0
1192	158.523	1_Johor	SMK JALAN KOTA TINGGI	58	Male	Malay	Diploma and below	Married	Yes	No	Low	216	No Sedentary	>=2	<3	Inadequate	6.5	< 7 hrs	103	Central obese	2	No Depression	8	Anxiety	8	No Stress	No	No	5.6	137.942	83.9038	6.8	1.5	5.02	1.1	No	Yes	No	No	No	No	1	0
1195	158.523	1_Johor	SMK JALAN KOTA TINGGI	39	Female	Malay	Degree	Divorced/Widowed	Yes	No	Moderate	240	No Sedentary	<2	<3	Inadequate	5.5	< 7 hrs	72	No central obese	14	Depression	12	Anxiety	14	Stress	No	No	5.1	98	68.2308	5.3	0.7	3.48	1.5	No	No	No	No	No	No	0	0
1196	158.523	1_Johor	SMK JALAN KOTA TINGGI	50	Female	Malay	Degree	Single	Yes	No	Low	360	No Sedentary	>=2	<3	Inadequate	6	< 7 hrs	88.5	Central obese	2	No Depression	4	No Anxiety	8	No Stress	No	No	4.8	125	70	6.9	2.5	4.36	1.4	No	No	No	No	No	Yes	0	0
1197	158.523	1_Johor	SMK JALAN KOTA TINGGI	34	Female	Malay	Degree	Married	No	No	Moderate	177	No Sedentary	<2	>=3	Inadequate	7	7 hrs and above	67	No central obese	0	No Depression	0	No Anxiety	0	No Stress	No	No	4.1	118	72	4.5	0.4	2.72	1.6	No	No	No	No	No	No	0	0
1198	158.523	1_Johor	SMK JALAN KOTA TINGGI	38	Female	Malay	Degree	Married	Yes	No	Moderate	135	No Sedentary	<2	<3	Inadequate	5.5	< 7 hrs	111	Central obese	0	No Depression	0	No Anxiety	6	No Stress	No	No	5.1	146	93	6.4	3	3.94	1.1	No	No	No	No	No	No	0	0
1199	158.523	1_Johor	SMK JALAN KOTA TINGGI	42	Female	Chinese	Degree	Married	No	No	Moderate	120	No Sedentary	>=2	<3	Inadequate	6.5	< 7 hrs	71.5	No central obese	14	Depression	14	Anxiety	12	No Stress	No	No	4.8	135	85	4.8	1.2	2.26	2	No	No	No	No	No	No	0	0
1200	158.523	1_Johor	SMK JALAN KOTA TINGGI	37	Male	Malay	Degree	Married	Yes	No	Low	187	No Sedentary	<2	<3	Inadequate	5	< 7 hrs	81	No central obese	4	No Depression	2	No Anxiety	4	No Stress	Yes	No	4.8	127	78	4.1	1.5	2.62	0.8	No	No	No	No	No	No	0	0
1201	158.523	1_Johor	SMK JALAN KOTA TINGGI	43	Male	Malay	Degree	Married	Yes	No	Moderate	201	No Sedentary	>=2	>=3	Adequate	4.5	< 7 hrs	102	Central obese	2	No Depression	0	No Anxiety	8	No Stress	No	No	10.4	138	87	5.2	1.6	2.97	1.5	No	Yes	No	No	No	No		1
1202	158.523	1_Johor	SMK JALAN KOTA TINGGI	28	Female	Malay	Degree	Married	Yes	No	High	205	No Sedentary	>=2	<3	Inadequate	5	< 7 hrs	63	No central obese	8	No Depression	6	No Anxiety	14	Stress	No	No	4.7	105	73	5	1	2.45	2.1	No	No	No	No	No	No	0	0
1203	158.523	1_Johor	SMK JALAN KOTA TINGGI	32	Female	Malay	Degree	Married	Yes	No	Low	60	No Sedentary	<2	<3	Inadequate	4.5	< 7 hrs	84	Central obese	0	No Depression	0	No Anxiety	0	No Stress	No	No	5	119	73	6.4	1.4	4.56	1.2	No	No	No	No	No	Yes	0	0
1204	158.523	1_Johor	SMK JALAN KOTA TINGGI	43	Female	Malay	Degree	Married	No	No	Moderate	30	No Sedentary	<2	<3	Inadequate	6	< 7 hrs	108	Central obese	0	No Depression	0	No Anxiety	0	No Stress	No	No	6.6	154	90.4423	6.4	1.8	4.38	1.2	No	Yes	No	No	No	No		1
1205	307.322	1_Johor	SMK SAINT JOSEPH	58	Male	Malay	Master and above	Married	No	No	Moderate	240	No Sedentary	<2	<3	Inadequate	6.5	< 7 hrs	95.5	Central obese	0	No Depression	0	No Anxiety	0	No Stress	No	No	4.7	140	83	5.6	1.8	3.58	1.2	No	No	No	No	No	Yes	0	0
1206	307.322	1_Johor	SMK SAINT JOSEPH	55	Male	Malay	Degree	Married	Yes	No	Low	90	No Sedentary	<2	<3	Inadequate	6	< 7 hrs	112	Central obese	0	No Depression	6	No Anxiety	4	No Stress	Yes	No	6	149	88	6	2	4.09	1	No	No	Yes	Yes	Yes	Yes		1
1207	307.322	1_Johor	SMK SAINT JOSEPH	51	Female	Malay	Degree	Married	Yes	No	Moderate	90	No Sedentary	>=2	<3	Inadequate	6.5	< 7 hrs	76	No central obese	2	No Depression	12	Anxiety	10	No Stress	No	No	4.4	122	70	4.4	0.5	2.47	1.7	No	No	No	No	No	No	0	0
1208	307.322	1_Johor	SMK SAINT JOSEPH	34	Male	Malay	Degree	Married	Yes	No	Low	151	No Sedentary	<2	<3	Inadequate	6.07981	< 7 hrs	98	Central obese	0	No Depression	10	Anxiety	2	No Stress	No	No	5.2	124	78	6.8	1.78077	4.39	1	No	No	No	No	No	Yes	0	0
1209	307.322	1_Johor	SMK SAINT JOSEPH	28	Male	Indian	Degree	Single	Yes	No	Low	180	No Sedentary	<2	<3	Inadequate	6.50769	< 7 hrs	94	Central obese	4	No Depression	14	Anxiety	22	Stress	No	No	5.1	108	74.2115	5.6	0.9	3.99	1.2	No	No	No	No	No	No	0	0
1210	307.322	1_Johor	SMK SAINT JOSEPH	40	Female	Malay	Degree	Married	No	No	Low	420	No Sedentary	<2	<3	Inadequate	5.5	< 7 hrs	71	No central obese	2	No Depression	2	No Anxiety	4	No Stress	No	No	4.3	128	79	5.9	1.7	3.83	1.3	No	No	No	No	No	No	0	0
1211	307.322	1_Johor	SMK SAINT JOSEPH	27	Male	Malay	Degree	Married	Yes	No	High	60	No Sedentary	<2	<3	Inadequate	6	< 7 hrs	76	No central obese	4	No Depression	8	Anxiety	10	No Stress	No	No	5.1	120	63	4.2	1.1	2.2	1.5	No	No	No	No	No	No	0	0
1212	307.322	1_Johor	SMK SAINT JOSEPH	47	Male	Malay	Diploma and below	Married	No	No	High	60	No Sedentary	<2	<3	Inadequate	6	< 7 hrs	96	Central obese	4	No Depression	8	Anxiety	10	No Stress	Yes	No	5.1	147	96	6.9	1.69808	4.06	1.2	No	No	No	No	No	No	0	0
1213	307.322	1_Johor	SMK SAINT JOSEPH	44	Male	Malay	Degree	Married	Yes	No	Low	300	No Sedentary	<2	<3	Inadequate	6	< 7 hrs	105	Central obese	4	No Depression	0	No Anxiety	2	No Stress	No	No	6	166	91.5962	5	1.7	3.23	1	No	Yes	No	No	No	Yes	1	0
1214	307.322	1_Johor	SMK SAINT JOSEPH	32	Male	Malay	Degree	Married	No	No	Moderate	60	No Sedentary	<2	<3	Inadequate	6.1	< 7 hrs	83	No central obese	16	Depression	26	Anxiety	16	Stress	No	No	4.4	112	68	4.5	0.8	3.14	1	No	No	No	No	No	No	0	0
1215	307.322	1_Johor	SMK SAINT JOSEPH	30	Male	Malay	Degree	Married	Yes	No	High	60	No Sedentary	<2	<3	Inadequate	5	< 7 hrs	86	No central obese	10	Depression	12	Anxiety	12	No Stress	No	No	6	121	74	5.3	1.7	3.43	1.1	No	Yes	No	No	No	No	1	0
1216	307.322	1_Johor	SMK SAINT JOSEPH	26	Male	Malay	Degree	Married	Yes	No	Moderate	120	No Sedentary	<2	<3	Inadequate	6.5	< 7 hrs	87	No central obese	4	No Depression	2	No Anxiety	4	No Stress	No	No	4.8	119	67	3.9	0.9	2.49	1	No	No	No	No	No	No	0	0
1217	307.322	1_Johor	SMK SAINT JOSEPH	28	Female	Malay	Degree	Married	No	No	Moderate	240	No Sedentary	<2	<3	Inadequate	6.5	< 7 hrs	70	No central obese	2	No Depression	8	Anxiety	8	No Stress	No	No	4.3	114	66	5.2	0.8	3.34	1.5	No	No	No	No	No	No	0	0
1218	307.322	1_Johor	SMK SAINT JOSEPH	30	Female	Malay	Master and above	Married	Yes	No	Low	220	No Sedentary	>=2	<3	Inadequate	5.5	< 7 hrs	91	Central obese	12	Depression	16	Anxiety	20	Stress	No	No	4.1	123	86	5.3	1.2	3.56	1.2	No	No	No	No	No	Yes	0	0
1219	307.322	1_Johor	SMK SAINT JOSEPH	26	Female	Malay	Degree	Single	Yes	No	Low	243	No Sedentary	<2	<3	Inadequate	8.5	7 hrs and above	71.8462	No central obese	10	Depression	18	Anxiety	16	Stress	No	No	4.4	117	80	4.9	0.5	2.47	2.2	No	No	No	No	No	No	0	0
1220	307.322	1_Johor	SMK SAINT JOSEPH	33	Female	Malay	Degree	Married	No	No	Low	100	No Sedentary	<2	<3	Inadequate	5.5	< 7 hrs	83	Central obese	8	No Depression	6	No Anxiety	8	No Stress	No	No	4.7	117	72	4.2	0.6	2.33	1.6	No	No	No	No	No	No	0	0
1221	307.322	1_Johor	SMK SAINT JOSEPH	48	Female	Malay	Master and above	Married	No	No	High	60	No Sedentary	<2	<3	Inadequate	6.5	< 7 hrs	74.5	No central obese	0	No Depression	0	No Anxiety	0	No Stress	No	No	5	117	67	6.5	0.8	4.44	1.7	No	No	No	No	No	No	0	0
1222	307.322	1_Johor	SMK SAINT JOSEPH	46	Female	Malay	Degree	Married	Yes	No	High	120	No Sedentary	<2	<3	Inadequate	7.5	7 hrs and above	78	No central obese	8	No Depression	12	Anxiety	10	No Stress	No	No	5	141	76	5.8	1.5	4.02	1.1	No	No	No	No	No	No	0	0
1223	307.322	1_Johor	SMK SAINT JOSEPH	40	Female	Malay	Degree	Married	Yes	No	Low	60	No Sedentary	<2	<3	Inadequate	6.5	< 7 hrs	95	Central obese	8	No Depression	2	No Anxiety	10	No Stress	No	No	5.5	144	75	8	1.4	5.66	1.7	No	No	No	No	No	No	0	0
1224	307.322	1_Johor	SMK SAINT JOSEPH	50	Female	Malay	Degree	Divorced/Widowed	Yes	No	Low	210	No Sedentary	<2	<3	Inadequate	6	< 7 hrs	103	Central obese	16	Depression	10	Anxiety	10	No Stress	No	No	5.3	166	101	5	1.2	3.46	1	No	No	No	No	No	No	0	0
1225	307.322	1_Johor	SMK SAINT JOSEPH	49	Female	Indian	Degree	Married	Yes	No	Low	226	No Sedentary	>=2	<3	Inadequate	6.5	< 7 hrs	91	Central obese	8	No Depression	14	Anxiety	6	No Stress	No	No	4.9	128	76	4.6	1.1	2.4	1.7	No	No	No	No	No	Yes	0	0
1226	307.322	1_Johor	SMK SAINT JOSEPH	35	Female	Malay	Master and above	Married	No	No	Low	60	No Sedentary	<2	<3	Inadequate	7	7 hrs and above	83	Central obese	14	Depression	16	Anxiety	24	Stress	No	No	4.4	117	71	5	1.4	3.16	1.2	No	No	No	No	No	No	0	0
1227	307.322	1_Johor	SMK SAINT JOSEPH	46	Female	Malay	Diploma and below	Married	No	No	Moderate	212	No Sedentary	<2	<3	Inadequate	7	7 hrs and above	86	Central obese	8	No Depression	12	Anxiety	10	No Stress	No	No	5.5	128	74	7.1	1.3	5.01	1.5	No	No	No	No	No	No	0	0
1228	62.182	1_Johor	SMK ANJUNG BATU	37	Female	Malay	Degree	Married	Yes	No	Low	173	No Sedentary	<2	<3	Inadequate	6.5	< 7 hrs	70.5	No central obese	6	No Depression	6	No Anxiety	12	No Stress	No	No	4.5	107	68	5.7	1.5	3.05	1.92	No	No	No	No	No	Yes	0	0
1230	62.182	1_Johor	SMK ANJUNG BATU	31	Female	Malay	Degree	Married	No	No	Low	198	No Sedentary	<2	<3	Inadequate	7	7 hrs and above	95	Central obese	0	No Depression	10	Anxiety	4	No Stress	No	No	4.2	126	82	4.1	1.5	1.87	1.56	No	No	No	No	No	No	0	0
1231	62.182	1_Johor	SMK ANJUNG BATU	49	Female	Malay	Degree	Married	No	No	High	180	No Sedentary	<2	<3	Inadequate	5	< 7 hrs	77	No central obese	6	No Depression	12	Anxiety	8	No Stress	No	No	4.9	133	88	6	1.9	3.39	1.72	No	No	No	No	No	Yes	0	0
1233	62.182	1_Johor	SMK ANJUNG BATU	43	Female	Malay	Degree	Married	No	No	Moderate	191	No Sedentary	<2	<3	Inadequate	8	7 hrs and above	82	Central obese	4	No Depression	2	No Anxiety	4	No Stress	No	No	4.8	109	82	4.6	1	2.91	1.25	No	No	No	No	No	No	0	0
1238	62.182	1_Johor	SMK ANJUNG BATU	30	Female	Malay	Degree	Married	No	No	Low	205	No Sedentary	<2	<3	Inadequate	8.5	7 hrs and above	80	Central obese	14	Depression	14	Anxiety	14	Stress	No	No	4.5	136	85	6.3	1.36731	3.55	1.29	No	No	No	No	No	No	0	0
1239	62.182	1_Johor	SMK ANJUNG BATU	33	Female	Malay	Degree	Married	No	No	High	165	No Sedentary	<2	<3	Inadequate	4.825	< 7 hrs	64	No central obese	12	Depression	12	Anxiety	12	No Stress	No	No	4.7	102	65.6346	5.4	0.7	3.19	1.9	No	No	No	No	No	No	0	0
1243	62.182	1_Johor	SMK ANJUNG BATU	32	Male	Malay	Degree	Married	Yes	No	Low	150	No Sedentary	<2	<3	Inadequate	4	< 7 hrs	81	No central obese	2	No Depression	2	No Anxiety	8	No Stress	No	No	4.3	117	76	5.2	1.2	3.43	1.22	No	No	No	No	No	No	0	0
1244	62.182	1_Johor	SMK ANJUNG BATU	28	Female	Malay	Degree	Married	Yes	No	Low	60	No Sedentary	<2	<3	Inadequate	7	7 hrs and above	67	No central obese	8	No Depression	14	Anxiety	16	Stress	No	No	4.7	110	67	5.7	1	3.63	1.59	No	No	No	No	No	No	0	0
1247	62.182	1_Johor	SMK ANJUNG BATU	32	Female	Malay	Degree	Married	Yes	No	Moderate	180	No Sedentary	<2	<3	Inadequate	9	7 hrs and above	95	Central obese	10	Depression	14	Anxiety	12	No Stress	No	No	4.5	122	75.75	3.8	1.4	2.04	1.12	No	No	No	No	No	No	0	0
1248	62.182	1_Johor	SMK ANJUNG BATU	49	Male	Malay	Degree	Married	Yes	No	High	120	No Sedentary	<2	<3	Inadequate	7.5	7 hrs and above	98	Central obese	8	No Depression	6	No Anxiety	8	No Stress	No	No	5.6	165	92	6.5	1.2	4.69	1.23	No	Yes	No	No	No	No	1	0
1250	353.42	1_Johor	SMK TAMAN SELESA JAYA 2	34	Female	Malay	Degree	Married	No	No	Moderate	40	No Sedentary	<2	<3	Inadequate	5.62115	< 7 hrs	88	Central obese	0	No Depression	6	No Anxiety	4	No Stress	No	No	5.3	120	74	5.7	2	3.59	1.2	No	No	No	No	No	Yes	0	0
1251	353.42	1_Johor	SMK TAMAN SELESA JAYA 2	32	Female	Malay	Degree	Married	Yes	No	Low	151	No Sedentary	<2	<3	Inadequate	6.5	< 7 hrs	75	No central obese	6	No Depression	8	Anxiety	4	No Stress	No	No	4.6	113	71.25	4.7	0.9	2.29	2	No	No	No	No	No	No	0	0
1252	353.42	1_Johor	SMK TAMAN SELESA JAYA 2	31	Male	Indian	Degree	Married	No	No	Low	240	No Sedentary	<2	<3	Inadequate	8	7 hrs and above	73	No central obese	2	No Depression	6	No Anxiety	12	No Stress	No	No	4.7	120	77	5.5	1.7	3.53	1.2	No	No	No	No	No	No	0	0
1253	353.42	1_Johor	SMK TAMAN SELESA JAYA 2	53	Female	Malay	Degree	Married	Yes	No	Low	190	No Sedentary	<2	<3	Inadequate	5.5	< 7 hrs	86	Central obese	12	Depression	14	Anxiety	14	Stress	No	No	7.1	122	79	5.42115	1.4	1.76	1.1	Yes	No	Yes	Yes	Yes	Yes		1
1254	353.42	1_Johor	SMK TAMAN SELESA JAYA 2	47	Female	Malay	Master and above	Divorced/Widowed	No	No	Moderate	192	No Sedentary	<2	<3	Inadequate	5.5	< 7 hrs	98	Central obese	0	No Depression	12	Anxiety	8	No Stress	No	No	8	144.788	105	7.3	1.87308	4.15	1.2	No	Yes	No	No	No	No		1
1255	353.42	1_Johor	SMK TAMAN SELESA JAYA 2	46	Female	Malay	Degree	Single	No	No	High	30	No Sedentary	>=2	>=3	Adequate	6.25	< 7 hrs	61	No central obese	14	Depression	14	Anxiety	26	Stress	No	No	4.5	100	65	5.4	0.4	3.22	2	No	No	No	No	No	No	0	0
1256	353.42	1_Johor	SMK TAMAN SELESA JAYA 2	25	Female	Malay	Degree	Married	Yes	No	Low	60	No Sedentary	<2	<3	Inadequate	5.5	< 7 hrs	65	No central obese	12	Depression	12	Anxiety	18	Stress	No	No	4.6	103	59	4.5	0.5	2.87	1.4	No	No	No	No	No	No	0	0
1257	353.42	1_Johor	SMK TAMAN SELESA JAYA 2	26	Female	Malay	Degree	Single	Yes	No	Low	120	No Sedentary	<2	<3	Inadequate	7	7 hrs and above	61	No central obese	6	No Depression	4	No Anxiety	8	No Stress	No	No	4.6	94	66	5.8	0.8	3.84	1.6	No	No	No	No	No	No	0	0
1258	353.42	1_Johor	SMK TAMAN SELESA JAYA 2	30	Female	Malay	Degree	Married	Yes	No	Moderate	30	No Sedentary	<2	<3	Inadequate	6.5	< 7 hrs	74	No central obese	8	No Depression	8	Anxiety	16	Stress	No	No	5.1	115	70	5.3	0.8	3.14	1.8	No	No	No	No	No	No	0	0
1260	353.42	1_Johor	SMK TAMAN SELESA JAYA 2	32	Female	Malay	Degree	Married	No	No	Low	184	No Sedentary	<2	>=3	Inadequate	6	< 7 hrs	62	No central obese	2	No Depression	6	No Anxiety	6	No Stress	No	No	4.9	102	66.3269	5.1	0.7	3.18	1.6	No	No	No	No	No	No	0	0
1261	353.42	1_Johor	SMK TAMAN SELESA JAYA 2	31	Male	Malay	Degree	Married	No	No	Low	149	No Sedentary	<2	<3	Inadequate	5.5	< 7 hrs	77	No central obese	0	No Depression	2	No Anxiety	2	No Stress	No	No	4.9	122	82	4.3	0.5	2.57	1.5	No	No	No	No	No	No	0	0
1262	353.42	1_Johor	SMK TAMAN SELESA JAYA 2	31	Female	Chinese	Degree	Married	No	No	Moderate	30	No Sedentary	<2	>=3	Inadequate	5.5	< 7 hrs	69	No central obese	8	No Depression	8	Anxiety	12	No Stress	No	No	5.2	108	65	4.66538	0.3	1.76	1.6	No	No	No	No	No	No	0	0
1263	353.42	1_Johor	SMK TAMAN SELESA JAYA 2	38	Male	Malay	Master and above	Married	Yes	No	Low	270	No Sedentary	<2	<3	Inadequate	7	7 hrs and above	97	Central obese	14	Depression	14	Anxiety	14	Stress	No	No	5.2	127	91	4.6	1.3	2.71	1.3	No	No	No	No	No	No	0	0
1264	353.42	1_Johor	SMK TAMAN SELESA JAYA 2	35	Female	Malay	Degree	Single	Yes	No	Moderate	150	No Sedentary	<2	<3	Inadequate	5.5	< 7 hrs	72	No central obese	12	Depression	24	Anxiety	20	Stress	No	No	4.6	119	70	4.9	1.1	2.9	1.5	No	No	No	No	No	No	0	0
1265	353.42	1_Johor	SMK TAMAN SELESA JAYA 2	31	Female	Malay	Degree	Married	No	No	Low	154	No Sedentary	<2	<3	Inadequate	5	< 7 hrs	69.5	No central obese	2	No Depression	4	No Anxiety	4	No Stress	No	No	4.7	104	69	4.6	0.6	2.23	2.1	No	No	No	No	No	No	0	0
1267	353.42	1_Johor	SMK TAMAN SELESA JAYA 2	24	Female	Malay	Degree	Single	Yes	No	Moderate	30	No Sedentary	<2	<3	Inadequate	8	7 hrs and above	66	No central obese	8	No Depression	4	No Anxiety	10	No Stress	No	No	4.5	103	68.9423	3.8	0.7	2.38	1.1	No	No	No	No	No	No	0	0
1268	353.42	1_Johor	SMK TAMAN SELESA JAYA 2	24	Female	Other races	Degree	Single	No	No	Low	199	No Sedentary	<2	<3	Inadequate	7.72019	7 hrs and above	66	No central obese	6	No Depression	4	No Anxiety	14	Stress	No	No	4.7	117	70	4.3	0.7	2.28	1.7	No	No	No	No	No	No	0	0
1269	353.42	1_Johor	SMK TAMAN SELESA JAYA 2	26	Female	Malay	Degree	Single	Yes	No	Moderate	600	sedentary	<2	<3	Inadequate	8	7 hrs and above	82	Central obese	2	No Depression	6	No Anxiety	4	No Stress	No	No	5.8	138	84	5.6	1.5	3.42	1.5	No	Yes	No	No	No	No	1	0
1270	148.987	1_Johor	SMK KOTA MASAI 2	28	Female	Malay	Degree	Single	No	No	Moderate	120	No Sedentary	<2	<3	Inadequate	7.5	7 hrs and above	78	No central obese	0	No Depression	8	Anxiety	4	No Stress	No	No	4.6	128	82	3.7	0.6	1.73	1.7	No	No	No	No	No	No	0	0
1271	148.987	1_Johor	SMK KOTA MASAI 2	29	Female	Malay	Degree	Married	Yes	No	Moderate	123	No Sedentary	<2	<3	Inadequate	7	7 hrs and above	77	No central obese	0	No Depression	2	No Anxiety	2	No Stress	No	No	4.7	119	69	4.6	0.7	2.78	1.5	No	No	No	No	No	No	0	0
1274	148.987	1_Johor	SMK KOTA MASAI 2	27	Female	Malay	Degree	Married	No	No	Moderate	60	No Sedentary	<2	>=3	Inadequate	6	< 7 hrs	72	No central obese	0	No Depression	2	No Anxiety	0	No Stress	No	No	4.6	113	71.6154	6.1	0.7	3.88	1.9	No	No	No	No	No	No	0	0
1276	148.987	1_Johor	SMK KOTA MASAI 2	35	Male	Malay	Degree	Married	No	No	Moderate	372	No Sedentary	<2	<3	Inadequate	7	7 hrs and above	91	Central obese	10	Depression	14	Anxiety	16	Stress	No	No	4.6	122	73	5.6	2.6	3.42	1	No	No	No	No	No	No	0	0
1277	148.987	1_Johor	SMK KOTA MASAI 2	26	Female	Malay	Degree	Married	Yes	No	Low	120	No Sedentary	<2	<3	Inadequate	7	7 hrs and above	74.0769	No central obese	2	No Depression	12	Anxiety	10	No Stress	No	No	4.3	112	69	4.7	0.8	3.14	1.2	No	No	No	No	No	No	0	0
1279	148.987	1_Johor	SMK KOTA MASAI 2	43	Female	Malay	Degree	Married	No	Yes	Low	176	No Sedentary	<2	<3	Inadequate	6.5	< 7 hrs	80	Central obese	10	Depression	16	Anxiety	18	Stress	No	No	4.9	107	64	4.8	0.4	2.72	1.9	No	No	No	No	No	No	0	0
1280	148.987	1_Johor	SMK KOTA MASAI 2	27	Female	Malay	Degree	Married	No	No	High	60	No Sedentary	<2	<3	Inadequate	6.5	< 7 hrs	81	Central obese	4	No Depression	12	Anxiety	8	No Stress	No	No	4.7	110	77	6.4	0.7	4.08	2	No	No	No	No	No	No	0	0
1281	148.987	1_Johor	SMK KOTA MASAI 2	28	Female	Malay	Degree	Married	No	Yes	Low	155	No Sedentary	<2	<3	Inadequate	5.5	< 7 hrs	89	Central obese	2	No Depression	2	No Anxiety	6	No Stress	No	No	4.4	120	80	5.8	0.9	3.79	1.6	No	No	No	No	No	No	0	0
1282	148.987	1_Johor	SMK KOTA MASAI 2	32	Female	Malay	Degree	Married	No	Yes	Low	208	No Sedentary	<2	>=3	Inadequate	6.51442	< 7 hrs	67	No central obese	10	Depression	10	Anxiety	14	Stress	No	No	4.3	113	69	3.6	0.3	2.36	1.1	No	No	No	No	No	No	0	0
1283	148.987	1_Johor	SMK KOTA MASAI 2	31	Female	Malay	Degree	Married	Yes	No	Low	190	No Sedentary	<2	<3	Inadequate	7	7 hrs and above	77	No central obese	2	No Depression	4	No Anxiety	10	No Stress	No	No	4.8	157	90	4.9	0.5	3.07	1.6	No	No	No	No	No	No	0	0
1284	148.987	1_Johor	SMK KOTA MASAI 2	27	Female	Malay	Degree	Single	No	No	High	216	No Sedentary	<2	<3	Inadequate	6	< 7 hrs	72.6269	No central obese	4	No Depression	2	No Anxiety	4	No Stress	No	No	4.5	113	66	4.7	0.6	2.23	2.2	No	No	No	No	No	No	0	0
1286	148.987	1_Johor	SMK KOTA MASAI 2	30	Female	Malay	Degree	Single	No	No	Low	202	No Sedentary	<2	<3	Inadequate	7	7 hrs and above	68	No central obese	0	No Depression	2	No Anxiety	2	No Stress	No	No	4.4	124	70	6.5	0.6	3.83	1.80846	No	No	No	No	No	No	0	0
1287	148.987	1_Johor	SMK KOTA MASAI 2	27	Female	Malay	Degree	Married	No	No	High	420	No Sedentary	<2	<3	Inadequate	6.5	< 7 hrs	65	No central obese	2	No Depression	8	Anxiety	8	No Stress	No	No	4.1	112	65	4.7	0.5	2.87	1.6	No	No	No	No	No	No	0	0
1288	148.987	1_Johor	SMK KOTA MASAI 2	43	Female	Malay	Master and above	Married	No	No	Moderate	195	No Sedentary	<2	<3	Inadequate	6	< 7 hrs	80	Central obese	0	No Depression	0	No Anxiety	2	No Stress	No	No	5.5	166	73	5.5	0.9	3.59	1.5	No	No	No	No	No	No	0	0
1290	148.987	1_Johor	SMK KOTA MASAI 2	27	Female	Malay	Degree	Single	Yes	No	Moderate	300	No Sedentary	<2	<3	Inadequate	5	< 7 hrs	87	Central obese	4	No Depression	6	No Anxiety	8	No Stress	No	No	5	117	80	4.3	0.4	2.92	1.2	No	No	No	No	No	No	0	0
1291	148.987	1_Johor	SMK KOTA MASAI 2	30	Female	Malay	Degree	Married	No	No	Low	217	No Sedentary	<2	<3	Inadequate	6.5	< 7 hrs	67	No central obese	6	No Depression	8	Anxiety	12	No Stress	No	No	4.3	121	67	4.9	0.8	2.84	1.7	No	No	No	No	No	No	0	0
1292	148.987	1_Johor	SMK KOTA MASAI 2	44	Female	Malay	Degree	Married	Yes	Yes	Moderate	300	No Sedentary	<2	<3	Inadequate	6	< 7 hrs	72	No central obese	8	No Depression	14	Anxiety	10	No Stress	No	No	4.8	101	60	5.3	0.6	3.03	2	No	No	No	No	No	No	0	0
1294	148.987	1_Johor	SMK KOTA MASAI 2	26	Female	Malay	Degree	Married	No	No	High	300	No Sedentary	<2	<3	Inadequate	5	< 7 hrs	67	No central obese	0	No Depression	24	Anxiety	8	No Stress	No	No	4.5	92	67.5962	5.2	1	3.15	1.6	No	No	No	No	No	No	0	0
1296	148.987	1_Johor	SMK KOTA MASAI 2	31	Female	Malay	Degree	Single	No	No	Moderate	180	No Sedentary	<2	<3	Inadequate	6	< 7 hrs	73	No central obese	8	No Depression	14	Anxiety	16	Stress	No	No	4.8	107	66	4.7	0.3	2.56	2	No	No	No	No	No	No	0	0
1297	148.987	1_Johor	SMK KOTA MASAI 2	31	Female	Malay	Degree	Married	Yes	No	Moderate	120	No Sedentary	<2	<3	Inadequate	5.5	< 7 hrs	83	Central obese	0	No Depression	2	No Anxiety	0	No Stress	No	No	4.7	120	80	6.4	1	4.35	1.6	No	No	No	No	No	No	0	0
1298	148.987	1_Johor	SMK KOTA MASAI 2	28	Female	Malay	Degree	Married	No	No	Moderate	167	No Sedentary	>=2	>=3	Adequate	6	< 7 hrs	67	No central obese	0	No Depression	4	No Anxiety	2	No Stress	No	No	4.1	99	63	4.6	0.5	2.17	2.2	No	No	No	No	No	No	0	0
1301	148.987	1_Johor	SMK KOTA MASAI 2	41	Female	Malay	Degree	Married	No	No	Moderate	300	No Sedentary	<2	<3	Inadequate	6	< 7 hrs	80	Central obese	8	No Depression	10	Anxiety	14	Stress	No	No	4.5	111	67	5.5	0.8	3.44	1.7	No	No	No	No	No	No	0	0
1302	148.987	1_Johor	SMK KOTA MASAI 2	29	Female	Malay	Degree	Married	Yes	No	Moderate	360	No Sedentary	<2	<3	Inadequate	7.5	7 hrs and above	74	No central obese	0	No Depression	2	No Anxiety	0	No Stress	No	No	4.7	100	61	4.8	1.1	3.1	1.2	No	No	No	No	No	No	0	0
1304	148.987	1_Johor	SMK KOTA MASAI 2	54	Male	Malay	Degree	Divorced/Widowed	No	No	Low	197	No Sedentary	<2	<3	Inadequate	6	< 7 hrs	79	No central obese	6	No Depression	10	Anxiety	10	No Stress	No	No	13	109	59	6	2.8	3.33	1.4	Yes	No	Yes	Yes	Yes	No		1
1305	148.987	1_Johor	SMK KOTA MASAI 2	32	Female	Malay	Degree	Married	No	No	Low	15	No Sedentary	<2	<3	Inadequate	6	< 7 hrs	69	No central obese	2	No Depression	10	Anxiety	8	No Stress	No	No	4.2	101	69	5.2	1	3.35	1.4	No	No	No	No	No	No	0	0
1306	148.987	1_Johor	SMK KOTA MASAI 2	27	Male	Malay	Degree	Married	No	No	Low	60	No Sedentary	<2	<3	Inadequate	6.5	< 7 hrs	81	No central obese	10	Depression	14	Anxiety	16	Stress	No	No	5	132	82	3.8	1	2.15	1.2	No	No	No	No	No	No	0	0
1308	148.987	1_Johor	SMK KOTA MASAI 2	25	Female	Malay	Diploma and below	Single	No	No	Low	180	No Sedentary	<2	>=3	Inadequate	9	7 hrs and above	67	No central obese	0	No Depression	10	Anxiety	10	No Stress	No	No	4.2	109	69	4.8	0.6	2.93	1.6	No	No	No	No	No	No	0	0
1309	148.987	1_Johor	SMK KOTA MASAI 2	31	Female	Malay	Degree	Married	Yes	No	Low	179	No Sedentary	<2	<3	Inadequate	7	7 hrs and above	74.3	No central obese	4	No Depression	4	No Anxiety	8	No Stress	No	No	4.3	115	72	6.2	0.5	3.97	2	No	No	No	No	No	No	0	0
1310	148.987	1_Johor	SMK KOTA MASAI 2	33	Female	Chinese	Degree	Married	Yes	No	Moderate	208	No Sedentary	<2	<3	Inadequate	8	7 hrs and above	64	No central obese	2	No Depression	2	No Anxiety	4	No Stress	No	No	4.7	109	70	4.75769	0.6	1.73	1.5	No	No	No	No	No	No	0	0
1311	148.987	1_Johor	SMK KOTA MASAI 2	27	Female	Chinese	Degree	Single	No	No	Moderate	180	No Sedentary	<2	<3	Inadequate	7.5	7 hrs and above	62	No central obese	8	No Depression	12	Anxiety	20	Stress	No	No	4.4	107	73	3.9	0.4	2.02	1.7	No	No	No	No	No	No	0	0
1314	148.987	1_Johor	SMK KOTA MASAI 2	28	Female	Malay	Degree	Single	Yes	No	Low	180	No Sedentary	<2	<3	Inadequate	6	< 7 hrs	79	No central obese	10	Depression	12	Anxiety	12	No Stress	No	No	5.1	110	59	4.4	0.6	2.83	1.3	No	No	No	No	No	No	0	0
1317	148.987	1_Johor	SMK KOTA MASAI 2	29	Male	Malay	Diploma and below	Married	No	No	High	30	No Sedentary	<2	<3	Inadequate	8	7 hrs and above	79	No central obese	4	No Depression	8	Anxiety	8	No Stress	No	No	4.7	146	71	4.7	1.1	3.1	1.1	No	No	No	No	No	No	0	0
1319	148.987	1_Johor	SMK KOTA MASAI 2	27	Male	Malay	Degree	Married	Yes	No	Low	183	No Sedentary	<2	<3	Inadequate	8.5	7 hrs and above	81	No central obese	4	No Depression	14	Anxiety	12	No Stress	No	No	4.77115	122	64	4.7	0.6	2.63	1.8	No	No	No	No	No	No	0	0
1321	148.987	1_Johor	SMK KOTA MASAI 2	31	Female	Malay	Degree	Married	No	No	Low	210	No Sedentary	<2	<3	Inadequate	7	7 hrs and above	84	Central obese	12	Depression	12	Anxiety	14	Stress	No	No	4.4	118	84	5.4	2	3.39	1.1	No	No	No	No	No	No	0	0
1322	148.987	1_Johor	SMK KOTA MASAI 2	26	Male	Malay	Degree	Married	Yes	No	Low	197	No Sedentary	<2	<3	Inadequate	5	< 7 hrs	91	Central obese	6	No Depression	10	Anxiety	4	No Stress	Yes	No	5.6	159	90	5.1	3	2.74	1	No	Yes	No	No	No	No	1	0
1323	148.987	1_Johor	SMK KOTA MASAI 2	24	Female	Malay	Degree	Single	Yes	No	Moderate	60	No Sedentary	<2	>=3	Inadequate	7	7 hrs and above	68	No central obese	2	No Depression	8	Anxiety	10	No Stress	No	No	4.2	114	81	4	0.4	2.22	1.6	No	No	No	No	No	No	0	0
1324	148.987	1_Johor	SMK KOTA MASAI 2	44	Female	Chinese	Degree	Married	No	No	Moderate	420	No Sedentary	<2	<3	Inadequate	6	< 7 hrs	102	Central obese	2	No Depression	8	Anxiety	10	No Stress	No	No	4.9	126	95	5.2	1	3.15	1.6	No	No	No	No	No	No	0	0
1325	148.987	1_Johor	SMK KOTA MASAI 2	27	Female	Malay	Degree	Married	No	No	Low	420	No Sedentary	<2	<3	Inadequate	6	< 7 hrs	76	No central obese	8	No Depression	16	Anxiety	18	Stress	No	No	4.8	119	75	4.1	0.5	2.57	1.3	No	No	No	No	No	No	0	0
1327	1902.27	1_Johor	SMK KAHANG	49	Male	Malay	Degree	Married	No	No	Moderate	138	No Sedentary	<2	>=3	Inadequate	5	< 7 hrs	115	Central obese	2	No Depression	4	No Anxiety	4	No Stress	No	No	5.1	135	81	5	1	3.35	1.2	No	No	No	No	No	No	0	0
1328	1902.27	1_Johor	SMK KAHANG	28	Male	Indian	Degree	Married	Yes	No	High	120	No Sedentary	<2	<3	Inadequate	7	7 hrs and above	94	Central obese	0	No Depression	12	Anxiety	8	No Stress	No	No	5.5	129	85	7	1.3	4.91	1.5	No	No	No	No	No	No	0	0
1329	294.517	1_Johor	SMK AMINUDDIN BAKI	59	Female	Malay	Degree	Married	No	No	Low	184	No Sedentary	<2	<3	Inadequate	6	< 7 hrs	96	Central obese	6	No Depression	6	No Anxiety	10	No Stress	No	No	5.6	110	68	4.9	1.2	3.26	1.1	No	Yes	No	No	No	No	1	0
1330	294.517	1_Johor	SMK AMINUDDIN BAKI	28	Female	Malay	Degree	Married	No	No	Low	154	No Sedentary	<2	<3	Inadequate	5.5	< 7 hrs	66	No central obese	4	No Depression	4	No Anxiety	4	No Stress	No	No	4.8	115	66	5.4	0.6	3.23	1.9	No	No	No	No	No	No	0	0
1332	294.517	1_Johor	SMK AMINUDDIN BAKI	27	Female	Malay	Degree	Single	No	No	Low	173	No Sedentary	<2	<3	Inadequate	7.5	7 hrs and above	69	No central obese	6	No Depression	10	Anxiety	8	No Stress	No	No	5	114	79	5	1	2.95	1.6	No	No	No	No	No	No	0	0
1333	294.517	1_Johor	SMK AMINUDDIN BAKI	34	Female	Malay	Degree	Married	No	No	Low	170	No Sedentary	<2	<3	Inadequate	5	< 7 hrs	76	No central obese	4	No Depression	6	No Anxiety	10	No Stress	No	No	5.4	110	77	3.8	1	2.15	1.2	No	No	No	No	No	No	0	0
1334	294.517	1_Johor	SMK AMINUDDIN BAKI	28	Female	Malay	Degree	Divorced/Widowed	No	No	High	180	No Sedentary	<2	<3	Inadequate	5.5	< 7 hrs	93	Central obese	6	No Depression	10	Anxiety	10	No Stress	No	No	4.7	120	80	5.3	1	3.35	1.5	No	No	No	No	No	No	0	0
1335	294.517	1_Johor	SMK AMINUDDIN BAKI	38	Female	Malay	Degree	Married	No	No	Low	136	No Sedentary	<2	<3	Inadequate	5	< 7 hrs	80	Central obese	0	No Depression	6	No Anxiety	4	No Stress	No	No	5.5	141	88	5.7	1.4	3.56	1.5	No	No	No	No	No	No	0	0
1336	294.517	1_Johor	SMK AMINUDDIN BAKI	51	Female	Malay	Degree	Married	Yes	No	Low	225	No Sedentary	<2	<3	Inadequate	6.5	< 7 hrs	80	Central obese	8	No Depression	10	Anxiety	10	No Stress	No	No	5.5	121	79	6	1.5	3.72	1.6	No	No	No	No	No	No	0	0
1337	294.517	1_Johor	SMK AMINUDDIN BAKI	31	Female	Malay	Degree	Married	No	No	Low	164	No Sedentary	<2	<3	Inadequate	5.5	< 7 hrs	63	No central obese	0	No Depression	4	No Anxiety	8	No Stress	No	No	4.8	123	73	4.2	0.6	2.53	1.4	No	No	No	No	No	No	0	0
1338	294.517	1_Johor	SMK AMINUDDIN BAKI	26	Male	Other races	Degree	Single	No	No	Moderate	193	No Sedentary	<2	<3	Inadequate	7.73173	7 hrs and above	69	No central obese	2	No Depression	8	Anxiety	4	No Stress	No	No	4.3	114	65	3.6	0.7	2.38	0.9	No	No	No	No	No	No	0	0
1339	294.517	1_Johor	SMK AMINUDDIN BAKI	29	Male	Malay	Degree	Married	Yes	No	High	231	No Sedentary	<2	<3	Inadequate	6	< 7 hrs	106	Central obese	4	No Depression	6	No Anxiety	12	No Stress	No	No	4.4	138	90	5.7	1.2	3.86	1.3	No	No	No	No	No	No	0	0
1340	294.517	1_Johor	SMK AMINUDDIN BAKI	28	Female	Malay	Degree	Married	Yes	Yes	Low	168	No Sedentary	<2	<3	Inadequate	7.5	7 hrs and above	76	No central obese	6	No Depression	2	No Anxiety	2	No Stress	No	No	4.4	109	61	5.2	0.4	3.22	1.8	No	No	No	No	No	No	0	0
1341	294.517	1_Johor	SMK AMINUDDIN BAKI	31	Female	Indian	Degree	Single	Yes	No	Low	211	No Sedentary	<2	<3	Inadequate	7.17404	7 hrs and above	72	No central obese	12	Depression	2	No Anxiety	4	No Stress	No	No	5.6	116	76	6.6	2.6	4.22	1.2	No	Yes	No	No	No	No	1	0
1344	294.517	1_Johor	SMK AMINUDDIN BAKI	52	Female	Malay	Degree	Married	Yes	No	Low	188	No Sedentary	<2	<3	Inadequate	5.5	< 7 hrs	91	Central obese	4	No Depression	10	Anxiety	10	No Stress	No	No	5.7	129	65	4.6	1.4	2.76	1.2	No	Yes	No	No	No	No	1	0
1346	294.517	1_Johor	SMK AMINUDDIN BAKI	31	Female	Malay	Degree	Single	No	No	Low	182	No Sedentary	<2	<3	Inadequate	6.5	< 7 hrs	72	No central obese	0	No Depression	2	No Anxiety	0	No Stress	No	No	5.4	122	80	4.6	1.2	2.96	1.1	No	No	No	No	No	No	0	0
1348	294.517	1_Johor	SMK AMINUDDIN BAKI	25	Male	Malay	Degree	Single	Yes	No	High	208	No Sedentary	<2	<3	Inadequate	6.5	< 7 hrs	80	No central obese	4	No Depression	12	Anxiety	10	No Stress	Yes	No	4.6	125	70	4.6	0.7	3.08	1.2	No	No	No	No	No	No	0	0
1349	294.517	1_Johor	SMK AMINUDDIN BAKI	53	Female	Malay	Diploma and below	Married	No	No	Low	184	No Sedentary	<2	<3	Inadequate	4.5	< 7 hrs	89	Central obese	4	No Depression	8	Anxiety	10	No Stress	No	No	4.8	105	64	5.6	0.8	4.04	1.2	No	No	No	No	No	No	0	0
1350	294.517	1_Johor	SMK AMINUDDIN BAKI	33	Female	Malay	Degree	Single	No	No	Low	210	No Sedentary	<2	<3	Inadequate	5.5	< 7 hrs	72	No central obese	0	No Depression	2	No Anxiety	4	No Stress	No	No	5.1	112	65	4.4	0.9	2.49	1.5	No	No	No	No	No	No	0	0
1351	294.517	1_Johor	SMK AMINUDDIN BAKI	59	Male	Malay	Degree	Married	No	No	Low	192	No Sedentary	<2	<3	Inadequate	6	< 7 hrs	107	Central obese	6	No Depression	6	No Anxiety	10	No Stress	No	No	6.5	133	78	3.9	1.6	1.97	1.2	No	Yes	No	No	Yes	Yes		1
1352	294.517	1_Johor	SMK AMINUDDIN BAKI	32	Female	Malay	Degree	Single	Yes	No	Low	199	No Sedentary	<2	<3	Inadequate	7	7 hrs and above	76	No central obese	16	Depression	16	Anxiety	18	Stress	No	No	5.1	125	88	3.9	0.8	1.94	1.6	No	No	No	No	No	No	0	0
1354	91.934	1_Johor	SMK KELAPA SAWIT	27	Female	Chinese	Degree	Single	No	No	Moderate	60	No Sedentary	<2	<3	Inadequate	6.5	< 7 hrs	81.7885	Central obese	4	No Depression	6	No Anxiety	8	No Stress	No	No	4.4	130	84	4.9	0.7	3.4	1.13	No	No	No	No	No	No	0	0
1355	91.934	1_Johor	SMK KELAPA SAWIT	35	Female	Chinese	Degree	Married	No	No	Low	231	No Sedentary	<2	<3	Inadequate	6	< 7 hrs	76.9462	No central obese	8	No Depression	22	Anxiety	16	Stress	No	No	4.4	123	83	5.6	0.5	3.99	1.4	No	No	No	No	No	No	0	0
1356	91.934	1_Johor	SMK KELAPA SAWIT	48	Male	Malay	Degree	Married	No	No	Moderate	120	No Sedentary	<2	<3	Inadequate	4	< 7 hrs	87.3212	No central obese	2	No Depression	4	No Anxiety	8	No Stress	Yes	No	5.3	126	76	6.1	1.5	4.15	1.32	No	No	No	No	No	No	0	0
1357	91.934	1_Johor	SMK KELAPA SAWIT	34	Male	Malay	Degree	Married	No	No	High	240	No Sedentary	<2	>=3	Inadequate	6	< 7 hrs	79.1212	No central obese	2	No Depression	6	No Anxiety	8	No Stress	Yes	No	5.2	111	67	4.6	0.6	3.08	1.21	No	No	No	No	No	No	0	0
1358	91.934	1_Johor	SMK KELAPA SAWIT	29	Male	Malay	Degree	Married	No	No	High	210	No Sedentary	<2	>=3	Inadequate	5	< 7 hrs	86.8923	No central obese	4	No Depression	6	No Anxiety	4	No Stress	No	No	4.8	131	86	6.8	2.2	4.72	1.09	No	No	No	No	No	No	0	0
1359	91.934	1_Johor	SMK KELAPA SAWIT	46	Female	Chinese	Master and above	Single	No	No	Moderate	120	No Sedentary	<2	<3	Inadequate	5	< 7 hrs	74.8673	No central obese	12	Depression	18	Anxiety	22	Stress	No	No	4.4	122	84	5	1	2.56	2	No	No	No	No	No	No	0	0
1360	91.934	1_Johor	SMK KELAPA SAWIT	26	Female	Chinese	Degree	Single	No	No	Low	240	No Sedentary	<2	<3	Inadequate	6	< 7 hrs	76.2788	No central obese	2	No Depression	10	Anxiety	10	No Stress	No	No	5.5	106	64	4	0.6	2.5	1.24	No	No	No	No	No	No	0	0
1361	91.934	1_Johor	SMK KELAPA SAWIT	27	Male	Malay	Degree	Single	No	No	Low	60	No Sedentary	<2	<3	Inadequate	7.5	7 hrs and above	88.2596	No central obese	4	No Depression	2	No Anxiety	10	No Stress	No	No	5.3	148	91	4.5	0.9	2.91	1.18	No	No	No	No	No	No	0	0
1362	91.934	1_Johor	SMK KELAPA SAWIT	38	Female	Chinese	Degree	Married	No	No	High	60	No Sedentary	<2	<3	Inadequate	7.5	7 hrs and above	79.2192	No central obese	2	No Depression	4	No Anxiety	6	No Stress	No	No	4.7	133	84	6.4	1.2	4.18	1.69	No	No	No	No	No	No	0	0
1364	91.934	1_Johor	SMK KELAPA SAWIT	53	Female	Malay	Degree	Married	No	No	High	240	No Sedentary	<2	>=3	Inadequate	6	< 7 hrs	86.5385	Central obese	8	No Depression	10	Anxiety	14	Stress	No	No	5.2	136	88	6.8	1.6	4.89	1.2	No	No	No	No	No	No	0	0
1365	91.934	1_Johor	SMK KELAPA SAWIT	28	Female	Chinese	Degree	Married	No	No	Moderate	165	No Sedentary	<2	<3	Inadequate	7	7 hrs and above	76.8615	No central obese	8	No Depression	6	No Anxiety	14	Stress	No	No	4.6	118	74	5.9	1	3.36	2.07	No	No	No	No	No	No	0	0
1366	91.934	1_Johor	SMK KELAPA SAWIT	45	Male	Malay	Master and above	Married	No	No	Moderate	120	No Sedentary	<2	<3	Inadequate	6.5	< 7 hrs	93.0673	Central obese	2	No Depression	14	Anxiety	18	Stress	No	No	5.4	148	95	5.5	2.6	3.33	0.96	No	No	No	No	No	No	0	0
1367	91.934	1_Johor	SMK KELAPA SAWIT	30	Female	Chinese	Degree	Married	No	No	Low	187	No Sedentary	>=2	<3	Inadequate	6.5	< 7 hrs	76.375	No central obese	12	Depression	10	Anxiety	12	No Stress	No	No	4.6	119	61	4.6	0.8	2.77	1.47	No	No	No	No	No	No	0	0
1368	91.934	1_Johor	SMK KELAPA SAWIT	28	Male	Malay	Degree	Married	No	No	Moderate	144	No Sedentary	<2	<3	Inadequate	6.5	< 7 hrs	84.2115	No central obese	14	Depression	10	Anxiety	12	No Stress	No	No	4.9	125	83	5.5	1.4	3.44	1.44	No	No	No	No	No	No	0	0
1369	91.934	1_Johor	SMK KELAPA SAWIT	34	Female	Chinese	Degree	Married	No	No	High	207	No Sedentary	<2	<3	Inadequate	5	< 7 hrs	83.5288	Central obese	12	Depression	14	Anxiety	16	Stress	No	No	5.5	102	75	5	1.5	3.21	1.1	No	No	No	No	No	No	0	0
1370	91.934	1_Johor	SMK KELAPA SAWIT	38	Female	Chinese	Degree	Married	No	No	Low	187	No Sedentary	<2	<3	Inadequate	8	7 hrs and above	85.2923	Central obese	10	Depression	16	Anxiety	18	Stress	No	No	5.1	132	92	5.7	1	3.63	1.67	No	No	No	No	No	No	0	0
1371	91.934	1_Johor	SMK KELAPA SAWIT	27	Female	Chinese	Degree	Married	No	No	Moderate	120	No Sedentary	<2	<3	Inadequate	7.35865	7 hrs and above	79.5865	No central obese	2	No Depression	4	No Anxiety	14	Stress	No	No	4.7	115	72	5.9	2.3	3.74	1.1	No	No	No	No	No	No	0	0
1372	91.934	1_Johor	SMK KELAPA SAWIT	27	Female	Chinese	Degree	Single	No	No	Moderate	60	No Sedentary	<2	<3	Inadequate	6	< 7 hrs	77.6212	No central obese	4	No Depression	6	No Anxiety	6	No Stress	No	No	4.8	136	78	5.3	0.8	3.39	1.54	No	No	No	No	No	No	0	0
1373	91.934	1_Johor	SMK KELAPA SAWIT	24	Female	Chinese	Degree	Single	No	No	Moderate	300	No Sedentary	<2	<3	Inadequate	7.5	7 hrs and above	75.3846	No central obese	10	Depression	8	Anxiety	22	Stress	No	No	5	110	63	4.1	0.8	2.56	1.19	No	No	No	No	No	No	0	0
1374	91.934	1_Johor	SMK KELAPA SAWIT	49	Female	Chinese	Degree	Married	No	No	Low	204	No Sedentary	<2	<3	Inadequate	6	< 7 hrs	84.9615	Central obese	10	Depression	10	Anxiety	12	No Stress	No	No	5.5	151	92	6.4	2	3.85	1.62	No	No	No	No	No	No	0	0
1375	91.934	1_Johor	SMK KELAPA SAWIT	48	Male	Malay	Degree	Single	No	No	Moderate	120	No Sedentary	<2	<3	Inadequate	4.5	< 7 hrs	90.3365	Central obese	6	No Depression	16	Anxiety	14	Stress	No	No	7	166	84	5.5	2.5	3.34	0.98	No	Yes	No	No	No	No		1
1376	91.934	1_Johor	SMK KELAPA SAWIT	45	Female	Chinese	Degree	Married	No	No	Moderate	120	No Sedentary	<2	<3	Inadequate	6.5	< 7 hrs	77.7019	No central obese	8	No Depression	12	Anxiety	14	Stress	Yes	No	5.1	128	68	5.05192	0.6	1.86	1.08	No	No	No	No	No	No	0	0
1377	91.934	1_Johor	SMK KELAPA SAWIT	29	Female	Chinese	Degree	Married	No	No	Moderate	30	No Sedentary	<2	<3	Inadequate	5	< 7 hrs	77.6346	No central obese	12	Depression	14	Anxiety	18	Stress	No	No	4.4	101	64	3.9	1.2	2.18	1.24	No	No	No	No	No	No	0	0
1378	91.934	1_Johor	SMK KELAPA SAWIT	42	Female	Chinese	Degree	Married	No	No	High	60	No Sedentary	>=2	<3	Inadequate	6	< 7 hrs	75.1769	No central obese	8	No Depression	8	Anxiety	8	No Stress	No	No	5.1	123	74	4.7	0.5	3	1.46	No	No	No	No	No	No	0	0
1379	91.934	1_Johor	SMK KELAPA SAWIT	30	Female	Chinese	Degree	Married	No	No	High	240	No Sedentary	<2	<3	Inadequate	5	< 7 hrs	75.5192	No central obese	24	Depression	24	Anxiety	18	Stress	No	No	4.1	118	64	6	0.7	3.8	1.89	No	No	No	No	No	No	0	0
1380	91.934	1_Johor	SMK KELAPA SAWIT	50	Male	Malay	Degree	Married	No	No	Low	60	No Sedentary	<2	<3	Inadequate	5	< 7 hrs	84.8673	No central obese	6	No Depression	4	No Anxiety	2	No Stress	No	No	5	120	81	6.5	0.9	4.7	1.42	No	No	No	No	No	No	0	0
1381	91.934	1_Johor	SMK KELAPA SAWIT	39	Male	Malay	Master and above	Married	No	No	Low	180	No Sedentary	<2	<3	Inadequate	6.5	< 7 hrs	91.1404	Central obese	4	No Depression	8	Anxiety	2	No Stress	No	No	4.6	130	88	6.2	1.3	4.57	1	No	No	No	No	No	No	0	0
1382	91.934	1_Johor	SMK KELAPA SAWIT	33	Female	Chinese	Degree	Married	No	No	Low	203	No Sedentary	<2	<3	Inadequate	7	7 hrs and above	79.1942	No central obese	4	No Depression	8	Anxiety	12	No Stress	No	No	4.5	126	68	4.7	1.1	2.78	1.39	No	No	No	No	No	No	0	0
1383	91.934	1_Johor	SMK KELAPA SAWIT	30	Female	Chinese	Degree	Single	No	No	Moderate	300	No Sedentary	<2	<3	Inadequate	7.5	7 hrs and above	76.3654	No central obese	6	No Depression	4	No Anxiety	8	No Stress	No	No	4.7	126	80	4.4	1.3	2.25	1.51	No	No	No	No	No	No	0	0
1384	91.934	1_Johor	SMK KELAPA SAWIT	30	Female	Chinese	Degree	Single	Yes	No	Low	238	No Sedentary	<2	<3	Inadequate	5	< 7 hrs	83.2635	Central obese	0	No Depression	0	No Anxiety	2	No Stress	No	No	4.4	144	88	5.3	0.9	3.61	1.31	No	No	No	No	No	No	0	0
1385	91.934	1_Johor	SMK KELAPA SAWIT	33	Female	Chinese	Degree	Single	Yes	No	Low	255	No Sedentary	<2	<3	Inadequate	5.5	< 7 hrs	79.9135	No central obese	6	No Depression	10	Anxiety	4	No Stress	No	No	4.6	121	81	7.6	2.8	4.91	1.46	No	No	No	No	No	No	0	0
1386	91.934	1_Johor	SMK KELAPA SAWIT	46	Female	Chinese	Degree	Married	Yes	No	High	217	No Sedentary	<2	<3	Inadequate	6	< 7 hrs	79.6788	No central obese	2	No Depression	6	No Anxiety	4	No Stress	No	No	4.3	139	80	6.6	0.8	4.21	2.01	No	No	No	No	No	No	0	0
1387	91.934	1_Johor	SMK KELAPA SAWIT	30	Female	Chinese	Degree	Single	No	No	Low	173	No Sedentary	>=2	<3	Inadequate	5	< 7 hrs	88.7865	Central obese	0	No Depression	0	No Anxiety	2	No Stress	No	No	7.5	162	97	5.2	1.2	3.65	0.99	No	Yes	No	No	No	No		1
1388	91.934	1_Johor	SMK KELAPA SAWIT	26	Female	Chinese	Degree	Single	Yes	No	Low	360	No Sedentary	<2	<3	Inadequate	7	7 hrs and above	74.9827	No central obese	8	No Depression	14	Anxiety	14	Stress	No	No	4.2	141	83	5.9	0.6	3.65	2.03	No	No	No	No	No	No	0	0
1389	211.364	1_Johor	SMK (FELDA) KAHANG TIMUR	41	Female	Malay	Degree	Married	Yes	No	High	240	No Sedentary	<2	<3	Inadequate	6.5	< 7 hrs	91	Central obese	0	No Depression	0	No Anxiety	0	No Stress	No	No	7.2	124	68	6.2	2.7	3.57	1.4	No	Yes	No	No	No	No		1
1390	211.364	1_Johor	SMK (FELDA) KAHANG TIMUR	34	Female	Malay	Degree	Married	No	No	Moderate	150	No Sedentary	<2	<3	Inadequate	7	7 hrs and above	78	No central obese	6	No Depression	6	No Anxiety	6	No Stress	No	No	4.8	111	60	4.1	0.4	2.52	1.4	No	No	No	No	No	No	0	0
1391	211.364	1_Johor	SMK (FELDA) KAHANG TIMUR	32	Female	Malay	Degree	Married	Yes	No	Moderate	360	No Sedentary	<2	>=3	Inadequate	5.5	< 7 hrs	77	No central obese	6	No Depression	12	Anxiety	8	No Stress	No	No	4.6	107	66	4.2	0.4	2.62	1.4	No	No	No	No	No	No	0	0
1392	211.364	1_Johor	SMK (FELDA) KAHANG TIMUR	39	Female	Malay	Degree	Married	No	No	Low	165	No Sedentary	<2	<3	Inadequate	5.5	< 7 hrs	80	Central obese	0	No Depression	6	No Anxiety	4	No Stress	No	No	4.7	99	68.3846	4.1	0.5	2.47	1.4	No	No	No	No	No	No	0	0
1393	211.364	1_Johor	SMK (FELDA) KAHANG TIMUR	53	Female	Malay	Degree	Married	Yes	No	Low	60	No Sedentary	<2	>=3	Inadequate	6	< 7 hrs	73	No central obese	4	No Depression	14	Anxiety	8	No Stress	No	No	4.7	106	67	5.2	1.2	3.26	1.4	No	No	No	No	Yes	No	0	0
1394	211.364	1_Johor	SMK (FELDA) KAHANG TIMUR	54	Female	Malay	Degree	Married	Yes	Yes	High	360	No Sedentary	<2	<3	Inadequate	5	< 7 hrs	86	Central obese	0	No Depression	0	No Anxiety	0	No Stress	No	No	7.7	148	71	5.5	1.2	3.96	1	Yes	No	Yes	Yes	Yes	Yes		1
1395	211.364	1_Johor	SMK (FELDA) KAHANG TIMUR	35	Female	Malay	Degree	Married	Yes	No	Low	165	No Sedentary	<2	<3	Inadequate	6	< 7 hrs	84	Central obese	6	No Depression	14	Anxiety	12	No Stress	No	No	4.2	111	76	4.3	0.6	2.53	1.5	No	No	No	No	No	No	0	0
1396	211.364	1_Johor	SMK (FELDA) KAHANG TIMUR	34	Female	Malay	Degree	Married	Yes	No	Low	240	No Sedentary	<2	<3	Inadequate	6.5	< 7 hrs	69	No central obese	12	Depression	16	Anxiety	16	Stress	No	No	4.7	106	68.4615	4.5	1.6	2.57	1.2	No	No	No	No	No	No	0	0
1397	211.364	1_Johor	SMK (FELDA) KAHANG TIMUR	25	Female	Malay	Degree	Married	No	No	High	240	No Sedentary	<2	<3	Inadequate	6.5	< 7 hrs	76	No central obese	18	Depression	2	No Anxiety	14	Stress	No	No	4.8	116	62	4.3	0.6	2.23	1.8	No	No	No	No	No	No	0	0
1398	211.364	1_Johor	SMK (FELDA) KAHANG TIMUR	43	Female	Malay	Degree	Married	No	No	Low	176	No Sedentary	<2	<3	Inadequate	5.5	< 7 hrs	86	Central obese	0	No Depression	2	No Anxiety	2	No Stress	No	No	4.7	136	82	6.8	0.9	4.79	1.6	No	No	No	No	No	No	0	0
1399	211.364	1_Johor	SMK (FELDA) KAHANG TIMUR	29	Male	Malay	Degree	Single	Yes	No	High	190	No Sedentary	<2	<3	Inadequate	5.5	< 7 hrs	85	No central obese	2	No Depression	14	Anxiety	14	Stress	No	No	5	140	79	6.6	1.2	4.56	1.5	No	No	No	No	No	No	0	0
1400	211.364	1_Johor	SMK (FELDA) KAHANG TIMUR	42	Female	Malay	Degree	Married	Yes	Yes	High	120	No Sedentary	>=2	<3	Inadequate	7.5	7 hrs and above	93	Central obese	4	No Depression	0	No Anxiety	0	No Stress	No	No	5.8	143	85	4.4	0.9	2.49	1.5	No	No	Yes	No	No	No		1
1401	211.364	1_Johor	SMK (FELDA) KAHANG TIMUR	37	Female	Malay	Degree	Married	Yes	No	Moderate	30	No Sedentary	>=2	<3	Inadequate	8	7 hrs and above	74	No central obese	8	No Depression	12	Anxiety	12	No Stress	No	No	4.9	110	61	4.7	0.6	2.63	1.8	No	No	No	No	No	No	0	0
1402	211.364	1_Johor	SMK (FELDA) KAHANG TIMUR	52	Male	Malay	Master and above	Married	No	No	Moderate	60	No Sedentary	<2	<3	Inadequate	5.5	< 7 hrs	86	No central obese	6	No Depression	6	No Anxiety	14	Stress	Yes	No	10.2	140	93	7.1	2.1	4.95	1.2	No	Yes	No	No	No	Yes		1
1403	211.364	1_Johor	SMK (FELDA) KAHANG TIMUR	40	Male	Malay	Degree	Married	Yes	No	Low	165	No Sedentary	<2	<3	Inadequate	5.5	< 7 hrs	100	Central obese	0	No Depression	4	No Anxiety	8	No Stress	No	No	4.9	147.635	103	5.5	1.3	3.81	1.1	No	No	No	No	Yes	Yes	0	0
1404	211.364	1_Johor	SMK (FELDA) KAHANG TIMUR	44	Female	Malay	Degree	Married	Yes	No	Moderate	60	No Sedentary	<2	<3	Inadequate	5	< 7 hrs	83	Central obese	28	Depression	28	Anxiety	28	Stress	No	No	4.8	124	66	5.3	0.9	3.79	1.1	No	No	No	No	No	No	0	0
1405	211.364	1_Johor	SMK (FELDA) KAHANG TIMUR	33	Female	Malay	Diploma and below	Married	Yes	No	Moderate	30	No Sedentary	<2	<3	Inadequate	7	7 hrs and above	94	Central obese	8	No Depression	6	No Anxiety	2	No Stress	No	No	5.8	133	79	3.8	0.6	2.13	1.4	No	Yes	No	No	No	No	1	0
1406	211.364	1_Johor	SMK (FELDA) KAHANG TIMUR	35	Male	Malay	Degree	Married	No	No	Low	169	No Sedentary	<2	<3	Inadequate	5.5	< 7 hrs	102	Central obese	0	No Depression	0	No Anxiety	0	No Stress	No	No	4.8	127	78	4.4	1.6	2.77	0.9	No	No	No	No	No	Yes	0	0
1407	268.731	1_Johor	SMK KULAI BESAR	50	Female	Malay	Degree	Married	Yes	No	Moderate	330	No Sedentary	<2	<3	Inadequate	7.65337	7 hrs and above	79	No central obese	6	No Depression	20	Anxiety	12	No Stress	No	No	7.60385	165	98	4.2	2.4	3.02212	1.6	Yes	No	Yes	Yes	No	Yes		1
1408	268.731	1_Johor	SMK KULAI BESAR	44	Female	Malay	Master and above	Married	Yes	No	Low	150	No Sedentary	<2	<3	Inadequate	5	< 7 hrs	77	No central obese	0	No Depression	0	No Anxiety	0	No Stress	No	No	5.3	146	86	3.8	0.7	2.28	1.2	No	No	No	No	No	No	0	0
1409	268.731	1_Johor	SMK KULAI BESAR	37	Female	Malay	Degree	Married	Yes	No	Moderate	180	No Sedentary	<2	<3	Inadequate	5	< 7 hrs	76	No central obese	10	Depression	24	Anxiety	28	Stress	No	No	5.3	120	81	4	0.7	2.28	1.4	No	No	Yes	No	No	No		1
1410	268.731	1_Johor	SMK KULAI BESAR	30	Male	Malay	Degree	Married	No	No	High	192	No Sedentary	>=2	<3	Inadequate	5	< 7 hrs	74	No central obese	4	No Depression	10	Anxiety	8	No Stress	No	No	4.8	115	70	4.3	1	2.65	1.2	No	No	No	No	No	No	0	0
1411	268.731	1_Johor	SMK KULAI BESAR	42	Female	Malay	Degree	Married	Yes	No	High	60	No Sedentary	<2	<3	Inadequate	5	< 7 hrs	77	No central obese	6	No Depression	12	Anxiety	6	No Stress	No	No	4.9	114	66	3.6	0.9	2.54635	1.6	No	No	No	No	No	No	0	0
1412	268.731	1_Johor	SMK KULAI BESAR	30	Male	Malay	Degree	Married	No	No	Moderate	360	No Sedentary	<2	<3	Inadequate	4.5	< 7 hrs	85	No central obese	2	No Depression	4	No Anxiety	8	No Stress	No	No	5.2	139	83	4.8	1.5	2.92	1.2	No	No	No	No	No	No	0	0
1413	268.731	1_Johor	SMK KULAI BESAR	44	Female	Malay	Degree	Married	No	No	High	360	No Sedentary	<2	<3	Inadequate	6	< 7 hrs	83	Central obese	4	No Depression	2	No Anxiety	2	No Stress	No	No	5.1	130	72	5	1.6	3.07	1.2	No	No	No	No	No	No	0	0
1414	268.731	1_Johor	SMK KULAI BESAR	49	Male	Malay	Master and above	Married	No	No	Low	300	No Sedentary	<2	<3	Inadequate	6.15337	< 7 hrs	108	Central obese	16	Depression	18	Anxiety	20	Stress	No	No	5.1	137.5	84.1731	6.7	2	4.49	1.3	No	No	No	No	No	No	0	0
1415	268.731	1_Johor	SMK KULAI BESAR	48	Male	Malay	Degree	Married	No	No	High	180	No Sedentary	<2	<3	Inadequate	6.5	< 7 hrs	92	Central obese	16	Depression	12	Anxiety	16	Stress	No	No	4.8	164	90.8269	5.9	1.6	3.77	1.4	No	No	No	No	Yes	No	0	0
1416	268.731	1_Johor	SMK KULAI BESAR	40	Female	Malay	Degree	Married	Yes	No	Low	175	No Sedentary	>=2	<3	Inadequate	6	< 7 hrs	94	Central obese	2	No Depression	2	No Anxiety	2	No Stress	No	No	6.4	149	94	5.6	2.3	3.36	1.2	No	Yes	No	No	No	No		1
1417	268.731	1_Johor	SMK KULAI BESAR	30	Female	Malay	Degree	Married	Yes	No	High	157	No Sedentary	<2	<3	Inadequate	6	< 7 hrs	92	Central obese	12	Depression	10	Anxiety	6	No Stress	No	No	4.2	123	83	5	1.1	3.2	1.3	No	No	No	No	No	No	0	0
1418	268.731	1_Johor	SMK KULAI BESAR	34	Female	Malay	Master and above	Married	No	No	High	120	No Sedentary	<2	>=3	Inadequate	6.5	< 7 hrs	71	No central obese	12	Depression	14	Anxiety	18	Stress	No	No	4.3	105	73	6.1	0.4	3.72	2.2	No	No	No	No	No	No	0	0
1419	268.731	1_Johor	SMK KULAI BESAR	33	Female	Malay	Degree	Married	Yes	No	Moderate	40	No Sedentary	<2	<3	Inadequate	7.5	7 hrs and above	82	Central obese	0	No Depression	6	No Anxiety	6	No Stress	No	No	5	107	82	4	0.8	2.24	1.4	No	No	No	No	No	No	0	0
1420	400.944	1_Johor	SMK KAYU ARA PASONG	56	Female	Malay	Degree	Married	No	No	High	60	No Sedentary	<2	<3	Inadequate	5.5	< 7 hrs	76	No central obese	8	No Depression	2	No Anxiety	12	No Stress	No	No	5	124	67	6.5	0.9	4.21	1.88	No	No	No	No	No	No	0	0
1421	400.944	1_Johor	SMK KAYU ARA PASONG	29	Female	Malay	Degree	Married	No	No	Low	191	No Sedentary	<2	<3	Inadequate	5	< 7 hrs	73	No central obese	6	No Depression	18	Anxiety	14	Stress	No	No	4.3	114	64	3.9	0.4	2.03	1.69	No	No	No	No	No	No	0	0
1422	400.944	1_Johor	SMK KAYU ARA PASONG	36	Female	Malay	Degree	Married	No	No	Low	144	No Sedentary	<2	<3	Inadequate	5.5	< 7 hrs	71	No central obese	4	No Depression	14	Anxiety	8	No Stress	No	No	4.6	117	69	4.5	1.2	2.85	1.11	No	No	No	No	No	No	0	0
1423	65.993	1_Johor	SMK ADELA	34	Female	Malay	Degree	Married	Yes	No	High	240	No Sedentary	<2	<3	Inadequate	8	7 hrs and above	61.5	No central obese	0	No Depression	0	No Anxiety	0	No Stress	No	No	4.6	100	62	5.2	0.8	3.12	1.69	No	No	No	No	No	No	0	0
1424	65.993	1_Johor	SMK ADELA	39	Female	Malay	Degree	Married	Yes	No	Moderate	185	No Sedentary	<2	<3	Inadequate	6	< 7 hrs	81	Central obese	2	No Depression	2	No Anxiety	6	No Stress	No	No	4.8	103	68.8654	4.1	0.8	2.39	1.38	No	No	No	No	No	No	0	0
1425	65.993	1_Johor	SMK ADELA	40	Female	Malay	Degree	Married	No	No	High	120	No Sedentary	>=2	>=3	Adequate	6.5	< 7 hrs	109	Central obese	0	No Depression	4	No Anxiety	0	No Stress	No	No	8.6	143.038	99	4.5	2.1	2.5	1.03	No	Yes	No	No	No	No		1
1426	65.993	1_Johor	SMK ADELA	31	Female	Malay	Degree	Married	Yes	No	Low	195	No Sedentary	<2	<3	Inadequate	6	< 7 hrs	88	Central obese	4	No Depression	6	No Anxiety	8	No Stress	No	No	5.1	115	79	5.7	1	4.02	1.25	No	No	No	No	No	No	0	0
1427	65.993	1_Johor	SMK ADELA	42	Female	Malay	Degree	Married	Yes	No	Low	172	No Sedentary	<2	<3	Inadequate	7.5	7 hrs and above	73	No central obese	4	No Depression	4	No Anxiety	2	No Stress	No	No	4.9	109	66	5.7	1	3.68	1.56	No	No	No	No	No	No	0	0
1428	65.993	1_Johor	SMK ADELA	27	Male	Malay	Degree	Married	Yes	No	Low	193	No Sedentary	<2	<3	Inadequate	7	7 hrs and above	73	No central obese	8	No Depression	18	Anxiety	14	Stress	No	No	4.8	97	70.7692	5.4	0.7	3.59	1.52	No	No	No	No	No	No	0	0
1429	65.993	1_Johor	SMK ADELA	33	Male	Malay	Degree	Married	Yes	No	Moderate	120	No Sedentary	<2	<3	Inadequate	5	< 7 hrs	69	No central obese	6	No Depression	6	No Anxiety	12	No Stress	No	No	4.9	129	75	6.1	1.3	3.93	1.55	No	No	Yes	No	Yes	Yes		1
1430	65.993	1_Johor	SMK ADELA	36	Female	Malay	Degree	Married	Yes	No	Low	180	No Sedentary	<2	<3	Inadequate	6.5	< 7 hrs	70	No central obese	2	No Depression	2	No Anxiety	2	No Stress	No	No	5.1	119	71.6596	5.1	0.5	3.23	1.69	No	No	No	No	No	No	0	0
1431	65.993	1_Johor	SMK ADELA	27	Female	Malay	Degree	Single	Yes	No	Low	155	No Sedentary	>=2	<3	Inadequate	6.5	< 7 hrs	66	No central obese	4	No Depression	6	No Anxiety	0	No Stress	No	No	4.8	102	61	3.9	0.7	2.04	1.53	No	No	No	No	No	No	0	0
1432	65.993	1_Johor	SMK ADELA	25	Female	Malay	Diploma and below	Single	Yes	No	High	214	No Sedentary	<2	>=3	Inadequate	5.5	< 7 hrs	96	Central obese	4	No Depression	4	No Anxiety	10	No Stress	No	No	5.6	159	92	4.6	1.2	3.03	1.06	No	Yes	No	No	No	No	1	0
1433	65.993	1_Johor	SMK ADELA	45	Female	Malay	Master and above	Married	Yes	No	Low	199	No Sedentary	<2	<3	Inadequate	6	< 7 hrs	84	Central obese	4	No Depression	6	No Anxiety	8	No Stress	No	No	4.4	134	81	3.6	0.8	2.60481	1.96	No	No	No	No	No	No	0	0
1434	65.993	1_Johor	SMK ADELA	43	Female	Malay	Degree	Married	Yes	No	Moderate	240	No Sedentary	<2	<3	Inadequate	6	< 7 hrs	75	No central obese	12	Depression	16	Anxiety	14	Stress	No	No	5.5	116	68	5.7	0.8	3.76	1.6	No	No	No	No	No	No	0	0
1435	65.993	1_Johor	SMK ADELA	39	Female	Malay	Degree	Single	Yes	No	High	120	No Sedentary	<2	<3	Inadequate	7.5	7 hrs and above	106	Central obese	0	No Depression	8	Anxiety	4	No Stress	No	No	5.3	155	88	5	1	3.53	1.07	No	No	No	No	No	No	0	0
1436	65.993	1_Johor	SMK ADELA	41	Female	Malay	Diploma and below	Married	Yes	Yes	Moderate	120	No Sedentary	<2	<3	Inadequate	6.5	< 7 hrs	76	No central obese	2	No Depression	0	No Anxiety	0	No Stress	No	No	4.8	117	70	5.5	0.9	3.31	1.76	No	No	No	No	No	No	0	0
1437	65.993	1_Johor	SMK ADELA	51	Female	Malay	Degree	Married	Yes	No	Low	198	No Sedentary	<2	<3	Inadequate	6	< 7 hrs	117	Central obese	0	No Depression	6	No Anxiety	2	No Stress	No	No	5.8	117	65	6.6	1.6	4.8	1.05	No	Yes	No	No	No	Yes	1	0
1438	65.993	1_Johor	SMK ADELA	48	Male	Malay	Degree	Married	No	No	Low	20	No Sedentary	<2	<3	Inadequate	6	< 7 hrs	82	No central obese	0	No Depression	2	No Anxiety	2	No Stress	Yes	No	4.4	127	83	7	1.3	4.87	1.57	No	No	No	No	No	No	0	0
1439	65.993	1_Johor	SMK ADELA	41	Male	Malay	Master and above	Married	Yes	No	Moderate	30	No Sedentary	<2	<3	Inadequate	6	< 7 hrs	91	Central obese	0	No Depression	4	No Anxiety	2	No Stress	No	No	4.9	133	87	6.3	2.1	3.74	1.57	No	No	No	No	No	No	0	0
1440	65.993	1_Johor	SMK ADELA	34	Female	Malay	Degree	Married	Yes	No	Moderate	120	No Sedentary	>=2	<3	Inadequate	4.5	< 7 hrs	86	Central obese	9	Depression	12	Anxiety	10	No Stress	No	No	6.1	108	72	4.4	1	2.85	1.08	No	Yes	No	No	No	No		1
1441	65.993	1_Johor	SMK ADELA	32	Female	Malay	Degree	Divorced/Widowed	No	No	Low	157	No Sedentary	<2	<3	Inadequate	5.5	< 7 hrs	62	No central obese	4	No Depression	2	No Anxiety	2	No Stress	No	No	4.3	115	66	5.6	0.9	3.56	1.64	No	No	No	No	No	No	0	0
1442	65.993	1_Johor	SMK ADELA	44	Male	Malay	Degree	Married	No	No	Moderate	159	No Sedentary	<2	<3	Inadequate	5.5	< 7 hrs	94	Central obese	0	No Depression	2	No Anxiety	0	No Stress	No	No	5.1	139	93	6.2	1.69808	3.73	1.09	No	No	No	No	No	Yes	0	0
1443	65.993	1_Johor	SMK ADELA	29	Male	Malay	Master and above	Married	No	No	High	10	No Sedentary	<2	<3	Inadequate	8	7 hrs and above	88	No central obese	2	No Depression	6	No Anxiety	0	No Stress	No	No	4.9	139	82	5	1.1	3.28	1.27	No	No	No	No	No	No	0	0
1444	65.993	1_Johor	SMK ADELA	53	Female	Malay	Degree	Married	No	No	Low	340	No Sedentary	>=2	>=3	Adequate	6	< 7 hrs	78	No central obese	4	No Depression	2	No Anxiety	2	No Stress	No	No	4.6	134	77	6.8	1	4.7	1.72	No	No	No	No	No	No	0	0
1445	65.993	1_Johor	SMK ADELA	47	Male	Malay	Master and above	Married	No	No	High	420	No Sedentary	<2	<3	Inadequate	6.5	< 7 hrs	86	No central obese	6	No Depression	6	No Anxiety	12	No Stress	No	No	4.8	123	79	7.2	2.6	4.73	1.27	No	No	No	No	No	No	0	0
1446	44.423	1_Johor	SMK LEDANG	47	Female	Malay	Degree	Married	No	No	Low	176	No Sedentary	<2	<3	Inadequate	6	< 7 hrs	107	Central obese	8	No Depression	8	Anxiety	10	No Stress	No	No	5.8	149	97	3.7	0.8	2.4	0.95	No	Yes	No	No	No	No	1	0
1447	44.423	1_Johor	SMK LEDANG	56	Male	Malay	Degree	Married	No	No	High	60	No Sedentary	<2	<3	Inadequate	8.5	7 hrs and above	74	No central obese	4	No Depression	6	No Anxiety	6	No Stress	No	No	4.4	108	64	6.1	0.9	4.07	1.63	No	No	No	No	No	No	0	0
1448	44.423	1_Johor	SMK LEDANG	52	Female	Malay	Degree	Married	No	No	Low	200	No Sedentary	<2	<3	Inadequate	6.5	< 7 hrs	87	Central obese	0	No Depression	2	No Anxiety	2	No Stress	No	No	13.4	141	77	6.9	1.8	4.43	1.64	No	Yes	No	No	No	No		1
1452	44.423	1_Johor	SMK LEDANG	49	Female	Malay	Degree	Married	Yes	No	High	164	No Sedentary	>=2	<3	Inadequate	6.5	< 7 hrs	95	Central obese	4	No Depression	2	No Anxiety	4	No Stress	No	No	5.9	171	96	5.6	2.8	2.77	1.57	No	Yes	No	No	No	No	1	0
1453	44.423	1_Johor	SMK LEDANG	30	Female	Malay	Degree	Married	No	No	Low	174	No Sedentary	>=2	>=3	Adequate	7	7 hrs and above	67	No central obese	2	No Depression	4	No Anxiety	2	No Stress	No	No	4.4	105	77	4.1	0.5	2.18	1.67	No	No	No	No	Yes	Yes	0	0
1454	44.423	1_Johor	SMK LEDANG	39	Female	Chinese	Degree	Married	No	No	Low	218	No Sedentary	<2	>=3	Inadequate	6.5	< 7 hrs	96.5	Central obese	4	No Depression	4	No Anxiety	8	No Stress	No	No	5	128	73	5.3	1.1	3.48	1.32	No	No	Yes	Yes	No	Yes		1
1455	44.423	1_Johor	SMK LEDANG	56	Male	Malay	Degree	Married	No	No	Low	196	No Sedentary	>=2	>=3	Adequate	5.5	< 7 hrs	85	No central obese	0	No Depression	2	No Anxiety	6	No Stress	No	No	10.1	156	98	6.2	1.7	4.3	1.09	No	Yes	No	No	No	No		1
1456	44.423	1_Johor	SMK LEDANG	45	Female	Malay	Degree	Married	Yes	No	High	180	No Sedentary	<2	<3	Inadequate	7	7 hrs and above	91	Central obese	2	No Depression	2	No Anxiety	2	No Stress	No	No	6.7	121	78	5.8	1.7	3.74	1.29	No	Yes	No	No	No	No		1
1457	44.423	1_Johor	SMK LEDANG	48	Male	Malay	Degree	Divorced/Widowed	No	No	High	245	No Sedentary	>=2	<3	Inadequate	6	< 7 hrs	83	No central obese	2	No Depression	8	Anxiety	10	No Stress	No	No	4.8	136	83	5	0.6	3.45	1.27	No	No	No	No	No	No	0	0
1458	44.423	1_Johor	SMK LEDANG	32	Female	Malay	Degree	Married	Yes	No	High	173	No Sedentary	<2	<3	Inadequate	7	7 hrs and above	70	No central obese	4	No Depression	0	No Anxiety	2	No Stress	No	No	5.2	106	63	3.8	0.8	2.04	1.44	No	No	No	No	No	No	0	0
1459	44.423	1_Johor	SMK LEDANG	54	Male	Indian	Degree	Married	No	No	Moderate	300	No Sedentary	<2	<3	Inadequate	6	< 7 hrs	88	No central obese	12	Depression	14	Anxiety	8	No Stress	No	No	4.6	136	83	5.3	1.8	3.2	1.24	No	No	No	No	No	No	0	0
1460	44.423	1_Johor	SMK LEDANG	34	Female	Malay	Degree	Married	No	No	Moderate	173	No Sedentary	<2	<3	Inadequate	6.5	< 7 hrs	60.5	No central obese	2	No Depression	12	Anxiety	8	No Stress	No	No	4.6	90	59	6.2	0.8	3.92	1.89	No	No	No	No	Yes	No	0	0
1461	44.423	1_Johor	SMK LEDANG	34	Female	Malay	Degree	Married	No	No	High	150	No Sedentary	<2	<3	Inadequate	7.5	7 hrs and above	60	No central obese	2	No Depression	0	No Anxiety	2	No Stress	Yes	No	4.7	112	69	4.1	0.5	2.48	1.38	No	No	No	Yes	No	No	0	0
1462	44.423	1_Johor	SMK LEDANG	29	Male	Malay	Degree	Single	Yes	No	High	180	No Sedentary	<2	<3	Inadequate	5.5	< 7 hrs	73	No central obese	14	Depression	14	Anxiety	14	Stress	No	No	5	133	87	4.5	1.7	2.81	0.96	No	No	No	No	No	No	0	0
1463	44.423	1_Johor	SMK LEDANG	36	Male	Chinese	Master and above	Married	Yes	No	High	240	No Sedentary	<2	<3	Inadequate	6.5	< 7 hrs	86	No central obese	2	No Depression	2	No Anxiety	2	No Stress	No	Yes	4.4	135	76	5.2	0.7	3.26	1.63	No	No	No	No	No	No	0	0
1464	44.423	1_Johor	SMK LEDANG	31	Female	Malay	Degree	Married	No	No	Moderate	25	No Sedentary	<2	<3	Inadequate	7.5	7 hrs and above	97.5	Central obese	0	No Depression	0	No Anxiety	0	No Stress	No	No	4.5	140	82	5.7	1.4	3.61	1.42	No	No	No	No	No	No	0	0
1465	44.423	1_Johor	SMK LEDANG	52	Male	Indian	Diploma and below	Married	No	No	High	360	No Sedentary	<2	<3	Inadequate	6.5	< 7 hrs	100	Central obese	2	No Depression	2	No Anxiety	0	No Stress	No	No	5.3	125	78	4.7	0.6	2.69	1.71	No	No	No	No	No	No	0	0
1466	44.423	1_Johor	SMK LEDANG	49	Female	Chinese	Degree	Single	Yes	No	Low	190	No Sedentary	<2	<3	Inadequate	7.5	7 hrs and above	72.5	No central obese	0	No Depression	0	No Anxiety	0	No Stress	No	No	5.7	118	72	6.3	1	3.31	1.67981	No	Yes	No	No	No	No	1	0
1467	44.423	1_Johor	SMK LEDANG	47	Female	Malay	Degree	Married	No	No	Low	164	No Sedentary	<2	<3	Inadequate	7	7 hrs and above	78	No central obese	0	No Depression	8	Anxiety	6	No Stress	No	No	5.7	125	70	6.2	1.6	3.38	2.11	No	Yes	No	No	No	No	1	0
1468	44.423	1_Johor	SMK LEDANG	59	Female	Chinese	Degree	Married	No	No	Moderate	120	No Sedentary	<2	<3	Inadequate	7.5	7 hrs and above	66	No central obese	0	No Depression	2	No Anxiety	4	No Stress	No	No	5.2	148	77	4.8	1	2.36	1.96	No	No	No	No	No	No	0	0
1469	44.423	1_Johor	SMK LEDANG	37	Female	Malay	Degree	Married	No	No	High	182	No Sedentary	<2	<3	Inadequate	6.5	< 7 hrs	82	Central obese	4	No Depression	2	No Anxiety	6	No Stress	No	No	5.2	129	81	4.9	1.1	2.46	1.95	No	No	No	No	No	No	0	0
1470	44.423	1_Johor	SMK LEDANG	34	Male	Malay	Degree	Married	No	No	Moderate	240	No Sedentary	<2	<3	Inadequate	5.5	< 7 hrs	83.5	No central obese	2	No Depression	4	No Anxiety	4	No Stress	No	No	5.1	129	91	6	0.9	4.22	1.32	No	No	No	No	No	No	0	0
1471	44.423	1_Johor	SMK LEDANG	30	Female	Malay	Degree	Married	No	No	Moderate	120	No Sedentary	<2	<3	Inadequate	8.5	7 hrs and above	78.5	No central obese	2	No Depression	12	Anxiety	8	No Stress	No	No	4.75577	126	65	4.4	1.7	2.47	1.15	No	No	No	No	No	No	0	0
1472	71.992	1_Johor	SMK LOKMAN HAKIM	41	Female	Malay	Degree	Married	Yes	No	High	120	No Sedentary	<2	<3	Inadequate	6.5	< 7 hrs	94	Central obese	2	No Depression	4	No Anxiety	6	No Stress	No	No	5	143	89	4.2	1.5	2.4	1.14	No	No	No	No	Yes	Yes	0	0
1473	71.992	1_Johor	SMK LOKMAN HAKIM	30	Female	Malay	Degree	Married	No	No	Moderate	300	No Sedentary	<2	>=3	Inadequate	7.5	7 hrs and above	68	No central obese	6	No Depression	0	No Anxiety	6	No Stress	No	No	4.5	99	66	4.3	0.9	2.47	1.45	No	No	No	No	No	No	0	0
1474	71.992	1_Johor	SMK LOKMAN HAKIM	34	Female	Malay	Degree	Married	No	No	High	300	No Sedentary	<2	<3	Inadequate	6.5	< 7 hrs	104	Central obese	0	No Depression	4	No Anxiety	10	No Stress	No	No	5.4	164	101	3.8	1.8	2.04	0.98	No	No	No	No	No	No	0	0
1475	71.992	1_Johor	SMK LOKMAN HAKIM	41	Female	Malay	Master and above	Married	Yes	Yes	High	230	No Sedentary	<2	<3	Inadequate	5	< 7 hrs	82	Central obese	4	No Depression	8	Anxiety	16	Stress	No	No	11.7	115	77	5.6	1.1	3.57	1.52	No	Yes	No	No	No	No		1
1476	71.992	1_Johor	SMK LOKMAN HAKIM	26	Female	Malay	Degree	Married	No	No	Low	160	No Sedentary	<2	<3	Inadequate	7	7 hrs and above	62	No central obese	14	Depression	18	Anxiety	18	Stress	No	No	4.3	101	64	3.8	0.5	2.42	1.16	No	No	No	No	No	No	0	0
1477	71.992	1_Johor	SMK LOKMAN HAKIM	33	Female	Malay	Master and above	Married	Yes	No	High	240	No Sedentary	>=2	<3	Inadequate	6.5	< 7 hrs	86	Central obese	0	No Depression	4	No Anxiety	10	No Stress	No	No	4.4	106	64	5.2	1.4	2.94	1.64	No	No	No	No	No	No	0	0
1478	71.992	1_Johor	SMK LOKMAN HAKIM	35	Female	Malay	Degree	Married	Yes	No	Moderate	120	No Sedentary	<2	<3	Inadequate	8	7 hrs and above	78	No central obese	0	No Depression	4	No Anxiety	10	No Stress	No	No	10.3	116	76	6.4	1.1	4.57	1.33	Yes	No	Yes	No	No	Yes		1
1479	71.992	1_Johor	SMK LOKMAN HAKIM	41	Male	Malay	Degree	Married	No	No	Low	196	No Sedentary	<2	<3	Inadequate	7	7 hrs and above	97	Central obese	10	Depression	10	Anxiety	12	No Stress	No	No	4.3	160	90	4.8	1	3.22	1.11	No	No	No	No	No	No	0	0
1480	71.992	1_Johor	SMK LOKMAN HAKIM	25	Female	Malay	Degree	Married	No	No	Moderate	180	No Sedentary	<2	<3	Inadequate	6.5	< 7 hrs	64	No central obese	2	No Depression	4	No Anxiety	2	No Stress	No	No	4.8	102	62	4.7	0.5	2.8	1.65	No	No	No	No	No	No	0	0
1481	71.992	1_Johor	SMK LOKMAN HAKIM	53	Female	Malay	Degree	Married	No	No	Low	60	No Sedentary	<2	<3	Inadequate	7	7 hrs and above	84	Central obese	12	Depression	16	Anxiety	18	Stress	No	No	5.1	134	78	6.5	0.8	4.12	1.98	No	No	No	No	No	No	0	0
1482	71.992	1_Johor	SMK LOKMAN HAKIM	42	Female	Malay	Degree	Married	No	No	Low	137	No Sedentary	<2	<3	Inadequate	6.5	< 7 hrs	80	Central obese	0	No Depression	0	No Anxiety	2	No Stress	No	No	4.6	107	68.2115	4.6	0.6	3.05	1.25	No	No	No	No	No	No	0	0
1483	71.992	1_Johor	SMK LOKMAN HAKIM	49	Male	Malay	Degree	Married	No	No	Low	180	No Sedentary	<2	<3	Inadequate	7.5	7 hrs and above	98	Central obese	18	Depression	8	Anxiety	14	Stress	No	No	5.7	162	109	6	1.6	4.07	1.18	No	Yes	No	No	No	No	1	0
1484	71.992	1_Johor	SMK LOKMAN HAKIM	40	Female	Malay	Degree	Married	Yes	No	Low	151	No Sedentary	<2	<3	Inadequate	5	< 7 hrs	79.5	No central obese	0	No Depression	2	No Anxiety	6	No Stress	No	No	5.1	118	75	5.6	0.4	3.66	1.72	No	No	No	No	No	No	0	0
1485	71.992	1_Johor	SMK LOKMAN HAKIM	40	Female	Malay	Degree	Married	Yes	No	High	60	No Sedentary	>=2	<3	Inadequate	8	7 hrs and above	82.5	Central obese	0	No Depression	4	No Anxiety	10	No Stress	No	No	4.9	107	64	5.7	1.3	3.73	1.36	No	No	No	No	No	No	0	0
1486	71.992	1_Johor	SMK LOKMAN HAKIM	26	Male	Malay	Degree	Married	No	No	Moderate	198	No Sedentary	<2	<3	Inadequate	5	< 7 hrs	82	No central obese	12	Depression	12	Anxiety	12	No Stress	No	No	4.3	119	68	4.2	0.7	2.82	1.02	No	No	No	No	No	No	0	0
1487	71.992	1_Johor	SMK LOKMAN HAKIM	54	Female	Malay	Master and above	Married	Yes	No	Low	60	No Sedentary	>=2	<3	Inadequate	6.02981	< 7 hrs	91	Central obese	16	Depression	24	Anxiety	22	Stress	No	No	6	129	71	6.7	1.2	4.81	1.39	No	Yes	No	No	No	Yes	1	0
1488	71.992	1_Johor	SMK LOKMAN HAKIM	44	Female	Malay	Degree	Married	Yes	Yes	Moderate	120	No Sedentary	<2	<3	Inadequate	7.5	7 hrs and above	67	No central obese	4	No Depression	12	Anxiety	6	No Stress	No	No	4.5	100	67	5.8	1.4	3.2	1.91	No	No	No	No	No	No	0	0
1489	71.992	1_Johor	SMK LOKMAN HAKIM	41	Female	Malay	Degree	Married	No	No	Low	165	No Sedentary	<2	<3	Inadequate	5.5	< 7 hrs	88	Central obese	2	No Depression	20	Anxiety	16	Stress	No	No	5.2	118	72	4.1	1.4	2.48	0.98	No	No	No	No	No	No	0	0
1490	71.992	1_Johor	SMK LOKMAN HAKIM	41	Female	Malay	Degree	Married	No	No	Moderate	120	No Sedentary	<2	<3	Inadequate	6	< 7 hrs	72	No central obese	0	No Depression	2	No Anxiety	6	No Stress	No	No	4.7	150	93	5.2	1	2.99	1.74	No	No	No	No	No	No	0	0
1491	71.992	1_Johor	SMK LOKMAN HAKIM	36	Male	Malay	Degree	Married	Yes	No	Low	169	No Sedentary	<2	<3	Inadequate	5	< 7 hrs	99	Central obese	12	Depression	6	No Anxiety	16	Stress	No	No	4.7	120	73	6.3	1.9	4.22	1.28	No	No	No	No	No	No	0	0
1492	71.992	1_Johor	SMK LOKMAN HAKIM	28	Female	Malay	Degree	Married	Yes	No	Low	200	No Sedentary	<2	<3	Inadequate	7.5	7 hrs and above	74	No central obese	4	No Depression	6	No Anxiety	6	No Stress	No	No	4.5	125	82	5.2	1.6	3.29	1.15	No	No	No	No	No	No	0	0
1493	42.806	1_Johor	SMK LAKSAMANA	45	Female	Malay	Diploma and below	Married	No	No	Moderate	420	No Sedentary	<2	<3	Inadequate	7.5	7 hrs and above	85	Central obese	6	No Depression	14	Anxiety	10	No Stress	No	No	4.8	109	77	4.9	1.2	2.82	1.49	No	No	No	No	No	Yes	0	0
1494	42.806	1_Johor	SMK LAKSAMANA	42	Male	Malay	Degree	Married	Yes	No	High	210	No Sedentary	<2	>=3	Inadequate	6	< 7 hrs	89	No central obese	0	No Depression	0	No Anxiety	0	No Stress	No	No	5.1	125	87	5	2	3.06	1.05	No	No	No	No	No	No	0	0
1495	42.806	1_Johor	SMK LAKSAMANA	41	Female	Malay	Degree	Married	Yes	No	Moderate	15	No Sedentary	<2	>=3	Inadequate	6	< 7 hrs	81.5	Central obese	0	No Depression	6	No Anxiety	4	No Stress	No	No	6.6	148	82	6.8	1.9	4.84	1.14	No	Yes	No	No	No	No		1
1496	42.806	1_Johor	SMK LAKSAMANA	41	Male	Malay	Diploma and below	Married	Yes	No	Low	120	No Sedentary	<2	<3	Inadequate	5.5	< 7 hrs	91.25	Central obese	12	Depression	14	Anxiety	18	Stress	No	No	5.6	122	84	5.9	2	3.87	1.16	No	Yes	No	No	No	Yes	1	0
1497	42.806	1_Johor	SMK LAKSAMANA	56	Female	Malay	Degree	Married	Yes	No	Low	204	No Sedentary	<2	<3	Inadequate	6	< 7 hrs	79.5	No central obese	0	No Depression	8	Anxiety	2	No Stress	No	No	4.4	127	63	6.6	1.3	4.12	1.83	No	No	No	No	No	No	0	0
1498	42.806	1_Johor	SMK LAKSAMANA	54	Male	Malay	Diploma and below	Married	No	No	Low	30	No Sedentary	>=2	<3	Inadequate	6	< 7 hrs	90	Central obese	0	No Depression	0	No Anxiety	0	No Stress	Yes	No	5.3	128	66	5.9	2.4	3.76	1.1	No	No	No	No	No	No	0	0
1499	42.806	1_Johor	SMK LAKSAMANA	51	Female	Chinese	Degree	Single	Yes	No	High	180	No Sedentary	<2	<3	Inadequate	6	< 7 hrs	88	Central obese	14	Depression	14	Anxiety	16	Stress	No	No	5.4	134	78	6.3	1.4	4.04	1.59	No	No	No	No	Yes	Yes	0	0
1500	42.806	1_Johor	SMK LAKSAMANA	26	Female	Malay	Degree	Single	Yes	No	Low	120	No Sedentary	<2	<3	Inadequate	6	< 7 hrs	72	No central obese	12	Depression	6	No Anxiety	12	No Stress	No	No	4.6	110	66	5.1	0.5	3.34	1.54	No	No	No	No	No	No	0	0
1501	42.806	1_Johor	SMK LAKSAMANA	36	Female	Malay	Master and above	Married	Yes	Yes	Moderate	191	No Sedentary	<2	<3	Inadequate	6.31827	< 7 hrs	115.5	Central obese	0	No Depression	6	No Anxiety	8	No Stress	No	No	7.4	118	81	7	2.4	4.57	1.3	No	Yes	No	No	No	Yes		1
1502	42.806	1_Johor	SMK LAKSAMANA	44	Female	Malay	Degree	Married	No	No	Moderate	192	No Sedentary	>=2	>=3	Adequate	6	< 7 hrs	72	No central obese	0	No Depression	2	No Anxiety	2	No Stress	No	No	5	106	62	4.5	1.5	2.3	1.47	No	No	No	No	No	No	0	0
1503	42.806	1_Johor	SMK LAKSAMANA	43	Female	Chinese	Degree	Married	No	No	Moderate	60	No Sedentary	>=2	<3	Inadequate	6.5	< 7 hrs	86.5	Central obese	12	Depression	12	Anxiety	14	Stress	No	No	5.6	151	100	4.9	1.7	3.01	1.15	No	Yes	No	No	No	No	1	0
1504	42.806	1_Johor	SMK LAKSAMANA	52	Female	Malay	Master and above	Married	No	No	High	243	No Sedentary	<2	>=3	Inadequate	6	< 7 hrs	73	No central obese	14	Depression	12	Anxiety	14	Stress	No	No	4.4	108	66	5.1	1.5	2.54	1.82	No	No	No	No	No	No	0	0
1505	42.806	1_Johor	SMK LAKSAMANA	50	Female	Malay	Degree	Married	No	No	Low	170	No Sedentary	<2	<3	Inadequate	5.5	< 7 hrs	71	No central obese	2	No Depression	6	No Anxiety	4	No Stress	No	No	5	105	71	5.3	0.7	3.17	1.75	No	No	No	No	No	No	0	0
1506	42.806	1_Johor	SMK LAKSAMANA	36	Female	Malay	Degree	Married	No	No	Low	207	No Sedentary	<2	<3	Inadequate	6.19183	< 7 hrs	106	Central obese	6	No Depression	8	Anxiety	10	No Stress	No	No	4.9	139	92	6.2	1.8	3.99	1.37	No	No	No	No	Yes	No	0	0
1507	42.806	1_Johor	SMK LAKSAMANA	47	Male	Malay	Degree	Married	No	No	Low	180	No Sedentary	<2	<3	Inadequate	6.5	< 7 hrs	99	Central obese	0	No Depression	2	No Anxiety	4	No Stress	No	No	5.3	153	87	6.8	2.9	4.32	1.12	No	No	No	No	No	No	0	0
1508	42.806	1_Johor	SMK LAKSAMANA	47	Male	Malay	Degree	Married	Yes	No	Moderate	60	No Sedentary	<2	<3	Inadequate	5	< 7 hrs	84	No central obese	4	No Depression	12	Anxiety	10	No Stress	No	No	5.6	173	87	5.8	1.1	3.94	1.4	No	Yes	No	No	Yes	No	1	0
1509	42.806	1_Johor	SMK LAKSAMANA	31	Female	Malay	Degree	Married	No	No	Low	125	No Sedentary	<2	<3	Inadequate	6.44808	< 7 hrs	78.5	No central obese	12	Depression	14	Anxiety	14	Stress	No	No	4.8	119	66	4.8	0.8	3.15	1.32	No	No	No	No	No	No	0	0
1510	42.806	1_Johor	SMK LAKSAMANA	46	Female	Malay	Degree	Married	No	No	Moderate	20	No Sedentary	<2	<3	Inadequate	5	< 7 hrs	72.5	No central obese	0	No Depression	2	No Anxiety	2	No Stress	No	No	4.7	137	81	5.5	1.6	3.29	1.47	No	No	No	No	No	No	0	0
1511	42.806	1_Johor	SMK LAKSAMANA	45	Female	Indian	Degree	Married	Yes	No	High	450	No Sedentary	<2	>=3	Inadequate	6.5	< 7 hrs	94.5	Central obese	1	No Depression	3	No Anxiety	4	No Stress	No	No	9.1	141	78	5	2.8	2.4	1.38	Yes	No	Yes	Yes	Yes	Yes		1
1512	42.806	1_Johor	SMK LAKSAMANA	44	Female	Malay	Degree	Married	No	No	Low	60	No Sedentary	<2	<3	Inadequate	5.5	< 7 hrs	77.5	No central obese	0	No Depression	2	No Anxiety	2	No Stress	No	No	4.8	110	65	4.6	0.7	2.87	1.41	No	No	No	No	No	No	0	0
1513	42.806	1_Johor	SMK LAKSAMANA	38	Male	Malay	Degree	Married	No	No	High	480	No Sedentary	<2	<3	Inadequate	6.5	< 7 hrs	85.5	No central obese	12	Depression	10	Anxiety	12	No Stress	Yes	No	4.8	111	68	4.9	1.3	3.14	1.14	No	No	No	No	No	No	0	0
1514	42.806	1_Johor	SMK LAKSAMANA	38	Male	Malay	Degree	Married	Yes	No	Low	198	No Sedentary	<2	<3	Inadequate	5.5	< 7 hrs	113	Central obese	4	No Depression	8	Anxiety	14	Stress	No	No	5.4	116	72	7.5	1	5.5	1.51	No	No	No	No	No	Yes	0	0
1515	42.806	1_Johor	SMK LAKSAMANA	27	Female	Malay	Degree	Single	Yes	No	Moderate	166	No Sedentary	<2	>=3	Inadequate	6.5	< 7 hrs	75.5	No central obese	4	No Depression	4	No Anxiety	2	No Stress	No	No	4.5	114	72	3.6	0.5	2.32	1.03	No	No	No	No	No	No	0	0
1516	42.806	1_Johor	SMK LAKSAMANA	47	Female	Malay	Degree	Married	No	No	Low	211	No Sedentary	<2	<3	Inadequate	7.17981	7 hrs and above	63	No central obese	10	Depression	6	No Anxiety	12	No Stress	No	No	4.6	108	67	4.5	0.5	2.64	1.65	No	No	No	No	No	No	0	0
1517	42.806	1_Johor	SMK LAKSAMANA	45	Female	Malay	Degree	Married	Yes	No	Moderate	60	No Sedentary	<2	<3	Inadequate	5.5	< 7 hrs	72.5	No central obese	2	No Depression	12	Anxiety	12	No Stress	No	No	4.7	123	69	4.5	1.3	2.66	1.25	No	No	No	No	No	No	0	0
1518	42.806	1_Johor	SMK LAKSAMANA	45	Male	Indian	Degree	Married	No	No	Low	90	No Sedentary	<2	<3	Inadequate	7	7 hrs and above	84	No central obese	2	No Depression	2	No Anxiety	4	No Stress	No	No	5.1	146	95	4.8	1	3.28	1.03	No	No	No	No	No	No	0	0
1519	42.806	1_Johor	SMK LAKSAMANA	29	Female	Chinese	Degree	Single	No	No	Low	188	No Sedentary	<2	>=3	Inadequate	8	7 hrs and above	61	No central obese	2	No Depression	2	No Anxiety	6	No Stress	No	No	4.9	96	65	4.8	0.7	2.54	1.89	No	No	No	No	No	No	0	0
1520	42.806	1_Johor	SMK LAKSAMANA	25	Female	Chinese	Diploma and below	Single	Yes	No	Low	360	No Sedentary	<2	<3	Inadequate	7	7 hrs and above	76.5	No central obese	0	No Depression	2	No Anxiety	4	No Stress	No	No	5.1	106	63	6	0.7	3.63	2.05	No	No	No	No	No	No	0	0
1521	42.806	1_Johor	SMK LAKSAMANA	48	Female	Malay	Degree	Married	Yes	No	Moderate	180	No Sedentary	<2	<3	Inadequate	7.5	7 hrs and above	81	Central obese	8	No Depression	22	Anxiety	16	Stress	No	No	4.8	134	72	5.4	1.28846	2.76	1.18	No	No	No	No	No	No	0	0
1522	42.806	1_Johor	SMK LAKSAMANA	30	Female	Chinese	Degree	Married	No	No	High	120	No Sedentary	>=2	<3	Inadequate	7.33413	7 hrs and above	67	No central obese	2	No Depression	8	Anxiety	14	Stress	No	No	4.8	112	67	4.3	0.7	2.73	1.28	No	No	No	No	No	No	0	0
1523	42.806	1_Johor	SMK LAKSAMANA	33	Female	Malay	Degree	Married	Yes	Yes	High	195	No Sedentary	<2	<3	Inadequate	6	< 7 hrs	74.5	No central obese	0	No Depression	4	No Anxiety	0	No Stress	No	No	4.8	95	64	4.5	1.5	2.39	1.47	No	No	No	No	No	No	0	0
1524	181.169	1_Johor	SMK LAYANG-LAYANG	33	Female	Malay	Degree	Single	Yes	No	Low	720	sedentary	<2	<3	Inadequate	6	< 7 hrs	69	No central obese	4	No Depression	6	No Anxiety	8	No Stress	No	No	5	111	70	6.3	0.9	4.19	1.7	No	No	No	No	No	No	0	0
1525	181.169	1_Johor	SMK LAYANG-LAYANG	39	Female	Malay	Degree	Married	Yes	No	Low	180	No Sedentary	<2	<3	Inadequate	6.22692	< 7 hrs	73	No central obese	4	No Depression	6	No Anxiety	12	No Stress	No	No	4.5	132	75	5.2	1.1	3.2	1.5	No	No	No	No	No	No	0	0
1526	181.169	1_Johor	SMK LAYANG-LAYANG	49	Female	Malay	Degree	Married	Yes	No	Moderate	60	No Sedentary	<2	<3	Inadequate	7	7 hrs and above	83	Central obese	0	No Depression	4	No Anxiety	4	No Stress	No	No	5.7	128	69	5	0.9	2.79	1.8	No	Yes	No	No	No	No	1	0
1527	181.169	1_Johor	SMK LAYANG-LAYANG	44	Female	Chinese	Degree	Married	No	No	Low	215	No Sedentary	<2	<3	Inadequate	7.5	7 hrs and above	89	Central obese	34	Depression	24	Anxiety	32	Stress	No	No	5.7	135	76	4.5	2	2.19	1.4	No	Yes	No	No	No	No	1	0
1528	181.169	1_Johor	SMK LAYANG-LAYANG	40	Female	Malay	Degree	Single	No	No	Moderate	182	No Sedentary	<2	<3	Inadequate	6.5	< 7 hrs	67	No central obese	2	No Depression	8	Anxiety	10	No Stress	No	No	5.5	133	77	6.1	0.6	3.53	2.3	No	No	No	No	No	No	0	0
1529	181.169	1_Johor	SMK LAYANG-LAYANG	53	Male	Malay	Degree	Married	Yes	No	Moderate	154	No Sedentary	>=2	>=3	Adequate	6.5	< 7 hrs	87	No central obese	0	No Depression	0	No Anxiety	2	No Stress	No	No	5.1	127	82	5.6	1.53077	3.25	0.9	No	No	No	No	No	No	0	0
1530	181.169	1_Johor	SMK LAYANG-LAYANG	31	Female	Chinese	Degree	Single	Yes	No	Moderate	300	No Sedentary	<2	>=3	Inadequate	6.72115	< 7 hrs	79	No central obese	8	No Depression	10	Anxiety	20	Stress	No	Yes	5	105	78	5	0.7	3.18	1.5	No	No	No	No	No	No	0	0
1531	181.169	1_Johor	SMK LAYANG-LAYANG	25	Male	Indian	Degree	Single	Yes	No	Low	189	No Sedentary	<2	<3	Inadequate	6	< 7 hrs	87	No central obese	14	Depression	14	Anxiety	16	Stress	No	No	4.3	126	81	4.4	1	3.05	0.9	No	No	No	No	No	No	0	0
1532	181.169	1_Johor	SMK LAYANG-LAYANG	25	Female	Indian	Degree	Single	No	No	Low	217	No Sedentary	<2	<3	Inadequate	8	7 hrs and above	71.5	No central obese	2	No Depression	4	No Anxiety	6	No Stress	No	No	4.7	101	64	5.6	1.1	4	1.1	No	No	No	No	No	No	0	0
1533	181.169	1_Johor	SMK LAYANG-LAYANG	36	Female	Malay	Degree	Married	No	No	Moderate	60	No Sedentary	<2	>=3	Inadequate	6	< 7 hrs	67.5	No central obese	8	No Depression	10	Anxiety	14	Stress	No	No	4.6	106	68	3.6	0.6	2.33	1	No	No	No	No	No	No	0	0
1534	181.169	1_Johor	SMK LAYANG-LAYANG	27	Male	Malay	Degree	Married	No	No	High	204	No Sedentary	<2	<3	Inadequate	4	< 7 hrs	81	No central obese	12	Depression	12	Anxiety	14	Stress	No	No	4.4	129	69	4.2	0.7	2.58	1.3	No	No	No	No	No	No	0	0
1535	181.169	1_Johor	SMK LAYANG-LAYANG	31	Female	Malay	Degree	Married	Yes	Yes	Moderate	181	No Sedentary	<2	<3	Inadequate	7.5	7 hrs and above	72	No central obese	4	No Depression	6	No Anxiety	8	No Stress	No	No	5	128	88	6.3	0.6	4.53	1.5	No	No	No	No	No	No	0	0
1536	181.169	1_Johor	SMK LAYANG-LAYANG	48	Male	Malay	Degree	Married	No	No	High	60	No Sedentary	<2	<3	Inadequate	5	< 7 hrs	92	Central obese	6	No Depression	12	Anxiety	12	No Stress	No	No	7.2	147	94	7.3	1.77115	3.96	1.3	Yes	No	Yes	No	No	No		1
1537	181.169	1_Johor	SMK LAYANG-LAYANG	26	Male	Malay	Degree	Single	Yes	No	Low	179	No Sedentary	<2	<3	Inadequate	4.5	< 7 hrs	90.3942	Central obese	10	Depression	16	Anxiety	18	Stress	No	No	4.8	172	104	5.9	0.8	4.44	1.1	No	No	No	No	No	No	0	0
1538	181.169	1_Johor	SMK LAYANG-LAYANG	25	Female	Malay	Degree	Married	No	No	Moderate	149	No Sedentary	<2	<3	Inadequate	7	7 hrs and above	80	Central obese	6	No Depression	8	Anxiety	12	No Stress	No	No	4.6	109	71	4.9	0.7	3.38	1.2	No	No	No	No	No	No	0	0
1539	181.169	1_Johor	SMK LAYANG-LAYANG	44	Male	Malay	Master and above	Married	No	No	High	60	No Sedentary	>=2	>=3	Adequate	6	< 7 hrs	97	Central obese	2	No Depression	4	No Anxiety	4	No Stress	No	No	5.4	132	82	7.2	1.58462	4.46	1.2	No	No	No	No	No	No	0	0
1540	181.169	1_Johor	SMK LAYANG-LAYANG	51	Male	Malay	Degree	Married	Yes	No	Low	193	No Sedentary	>=2	<3	Inadequate	6	< 7 hrs	93	Central obese	4	No Depression	0	No Anxiety	2	No Stress	Yes	No	4.2	135	92	4.9	1.1	3.2	1.2	No	No	No	No	Yes	No	0	0
1541	181.169	1_Johor	SMK LAYANG-LAYANG	39	Female	Malay	Degree	Married	No	No	Low	360	No Sedentary	<2	<3	Inadequate	6	< 7 hrs	77.5	No central obese	4	No Depression	8	Anxiety	12	No Stress	No	No	5	125	75	4.9	0.7	2.88	1.7	No	No	No	No	No	No	0	0
1542	181.169	1_Johor	SMK LAYANG-LAYANG	43	Female	Indian	Degree	Single	No	No	Low	167	No Sedentary	<2	<3	Inadequate	7.6125	7 hrs and above	98	Central obese	8	No Depression	10	Anxiety	14	Stress	No	No	5.1	130	71	4.1	0.5	2.37	1.5	No	No	No	No	No	No	0	0
1543	181.169	1_Johor	SMK LAYANG-LAYANG	41	Male	Malay	Degree	Married	No	No	Moderate	129	No Sedentary	<2	<3	Inadequate	5.5	< 7 hrs	83	No central obese	10	Depression	14	Anxiety	10	No Stress	No	No	5.6	116	71	5.2	0.9	3.25	1.49	No	Yes	No	No	No	No	1	0
1544	436.688	1_Johor	SMK MUNSHI ABDULLAH (KULAI)	32	Female	Malay	Degree	Married	No	No	High	194	No Sedentary	<2	<3	Inadequate	7	7 hrs and above	62	No central obese	4	No Depression	10	Anxiety	8	No Stress	No	No	4.1	123	85	4.3	0.9	2.49	1.4	No	No	Yes	No	No	No		1
1545	436.688	1_Johor	SMK MUNSHI ABDULLAH (KULAI)	34	Female	Malay	Degree	Married	No	No	Low	150	No Sedentary	<2	<3	Inadequate	5.5	< 7 hrs	82	Central obese	2	No Depression	12	Anxiety	10	No Stress	No	No	4.7	107	73	5.8	1.4	3.56	1.6	No	No	No	No	No	Yes	0	0
1548	436.688	1_Johor	SMK MUNSHI ABDULLAH (KULAI)	40	Female	Malay	Degree	Married	No	Yes	Low	180	No Sedentary	<2	<3	Inadequate	6	< 7 hrs	70	No central obese	10	Depression	26	Anxiety	36	Stress	No	No	5	115	81	4.4	0.8	2.84	1.2	No	No	No	No	No	No	0	0
1551	436.688	1_Johor	SMK MUNSHI ABDULLAH (KULAI)	49	Male	Malay	Master and above	Married	Yes	No	High	240	No Sedentary	<2	<3	Inadequate	8	7 hrs and above	94	Central obese	6	No Depression	10	Anxiety	10	No Stress	No	No	5.8	136	81	6	1	3.95	1.6	No	Yes	No	No	No	Yes	1	0
1552	720.103	1_Johor	SMK TAMAN MEGAH RIA	42	Female	Chinese	Degree	Married	Yes	No	High	120	No Sedentary	<2	<3	Inadequate	6	< 7 hrs	78	No central obese	14	Depression	10	Anxiety	14	Stress	No	No	5.1	113	72	5.64808	1.05192	3.39	1.62654	No	No	No	No	No	Yes	0	0
1553	720.103	1_Johor	SMK TAMAN MEGAH RIA	27	Female	Malay	Degree	Married	Yes	No	Moderate	204	No Sedentary	<2	<3	Inadequate	6	< 7 hrs	88	Central obese	4	No Depression	2	No Anxiety	6	No Stress	No	No	4.1	122	77	5.26731	1.13462	2.99	1.44827	No	No	No	No	No	No	0	0
1554	720.103	1_Johor	SMK TAMAN MEGAH RIA	25	Female	Malay	Degree	Married	Yes	Yes	High	480	No Sedentary	<2	<3	Inadequate	6	< 7 hrs	66	No central obese	4	No Depression	8	Anxiety	4	No Stress	No	No	4.3	129	91	5.40385	0.840385	2.24	2.24	No	No	No	No	No	No	0	0
1555	720.103	1_Johor	SMK TAMAN MEGAH RIA	37	Female	Malay	Diploma and below	Single	No	No	High	229	No Sedentary	<2	<3	Inadequate	6	< 7 hrs	63	No central obese	2	No Depression	6	No Anxiety	10	No Stress	No	No	4.7	102	61	5.06538	0.723077	3.32	1.64519	No	No	No	No	No	No	0	0
1556	720.103	1_Johor	SMK TAMAN MEGAH RIA	27	Female	Malay	Degree	Married	No	No	Low	180	No Sedentary	<2	<3	Inadequate	8.5	7 hrs and above	71	No central obese	2	No Depression	6	No Anxiety	10	No Stress	No	No	4.71538	109	76	4.925	0.801923	2.42	1.55423	No	No	No	No	No	No	0	0
1557	720.103	1_Johor	SMK TAMAN MEGAH RIA	25	Female	Malay	Degree	Single	Yes	No	Moderate	194	No Sedentary	>=2	<3	Inadequate	6.5	< 7 hrs	64	No central obese	16	Depression	10	Anxiety	14	Stress	No	No	5.1	95	67.7885	5.20558	0.888462	2.61	1.64904	No	No	No	No	No	No	0	0
1559	232.44	1_Johor	SMK MUNSHI SULAIMAN	37	Female	Malay	Degree	Married	Yes	No	Moderate	153	No Sedentary	<2	<3	Inadequate	7.5	7 hrs and above	79	No central obese	4	No Depression	10	Anxiety	10	No Stress	No	No	4.85192	130	80	5	0.8	3.14	1.5	No	No	No	No	No	No	0	0
1560	232.44	1_Johor	SMK MUNSHI SULAIMAN	46	Female	Malay	Degree	Single	Yes	No	Low	223	No Sedentary	<2	<3	Inadequate	6.5	< 7 hrs	67.5	No central obese	2	No Depression	10	Anxiety	8	No Stress	No	No	4.8	110	69	5.2	1.1	2.9	1.8	No	No	No	No	No	Yes	0	0
1561	232.44	1_Johor	SMK MUNSHI SULAIMAN	52	Female	Malay	Degree	Married	No	No	High	212	No Sedentary	<2	<3	Inadequate	5.5	< 7 hrs	83.1	Central obese	6	No Depression	6	No Anxiety	8	No Stress	No	No	5.3	145	78	5.5	1.1	3.3	1.7	No	No	No	No	No	No	0	0
1562	232.44	1_Johor	SMK MUNSHI SULAIMAN	49	Female	Malay	Degree	Married	No	No	Moderate	480	No Sedentary	<2	<3	Inadequate	5.5	< 7 hrs	82.4	Central obese	0	No Depression	2	No Anxiety	0	No Stress	No	No	5.2	131	73	7.1	1.5	4.82	1.6	No	No	No	No	No	No	0	0
1563	232.44	1_Johor	SMK MUNSHI SULAIMAN	46	Female	Chinese	Degree	Divorced/Widowed	No	No	Low	150	No Sedentary	<2	<3	Inadequate	7.5	7 hrs and above	64.1	No central obese	0	No Depression	0	No Anxiety	2	No Stress	No	No	4.8	113	70.5192	5.7	0.5	3.47	2	No	No	No	No	No	No	0	0
1564	232.44	1_Johor	SMK MUNSHI SULAIMAN	53	Male	Malay	Master and above	Married	No	No	High	240	No Sedentary	<2	<3	Inadequate	5.5	< 7 hrs	78.5	No central obese	0	No Depression	8	Anxiety	6	No Stress	No	No	5.5	136	76	6.2	0.7	4.58	1	No	No	No	No	No	Yes	0	0
1565	232.44	1_Johor	SMK MUNSHI SULAIMAN	45	Female	Malay	Degree	Married	No	No	Low	180	No Sedentary	<2	<3	Inadequate	6	< 7 hrs	81	Central obese	0	No Depression	0	No Anxiety	0	No Stress	No	No	4.3	120	75	4.7	0.7	2.78	1.6	No	No	No	No	No	No	0	0
1566	232.44	1_Johor	SMK MUNSHI SULAIMAN	47	Male	Chinese	Degree	Married	Yes	No	Moderate	300	No Sedentary	<2	>=3	Inadequate	6	< 7 hrs	91	Central obese	0	No Depression	0	No Anxiety	0	No Stress	Yes	No	4.9	137	87	4.4	1.2	2.76	1.1	No	No	No	No	Yes	No	0	0
1568	232.44	1_Johor	SMK MUNSHI SULAIMAN	37	Female	Malay	Degree	Married	Yes	Yes	Moderate	120	No Sedentary	<2	<3	Inadequate	6.5	< 7 hrs	73.5	No central obese	12	Depression	12	Anxiety	14	Stress	No	No	4.6	108	68	5.3	1.6	3.17	1.4	No	No	No	No	No	No	0	0
1569	232.44	1_Johor	SMK MUNSHI SULAIMAN	31	Female	Chinese	Diploma and below	Married	Yes	No	Low	197	No Sedentary	<2	<3	Inadequate	7.01202	7 hrs and above	73	No central obese	4	No Depression	4	No Anxiety	2	No Stress	No	No	4.7	99	67.8269	4.1	0.7	1.98	1.8	No	No	No	No	No	No	0	0
1570	232.44	1_Johor	SMK MUNSHI SULAIMAN	56	Female	Malay	Degree	Divorced/Widowed	Yes	No	Moderate	120	No Sedentary	<2	<3	Inadequate	5.5	< 7 hrs	81.5	Central obese	14	Depression	2	No Anxiety	6	No Stress	No	No	6.5	132	75	5.4	0.9	3.39	1.6	No	No	Yes	Yes	Yes	No		1
1571	232.44	1_Johor	SMK MUNSHI SULAIMAN	33	Female	Malay	Degree	Single	No	No	Moderate	360	No Sedentary	<2	<3	Inadequate	6	< 7 hrs	73.5	No central obese	0	No Depression	2	No Anxiety	4	No Stress	No	No	4.9	106	70	6.6	0.8	3.84	1.64731	No	No	No	No	No	No	0	0
1572	232.44	1_Johor	SMK MUNSHI SULAIMAN	43	Female	Malay	Degree	Married	Yes	No	Low	30	No Sedentary	<2	<3	Inadequate	5.5	< 7 hrs	76.5	No central obese	8	No Depression	6	No Anxiety	14	Stress	No	No	4.8	143	89	6	1.7	3.93	1.3	No	No	No	No	No	No	0	0
1573	232.44	1_Johor	SMK MUNSHI SULAIMAN	29	Male	Malay	Degree	Married	Yes	No	Moderate	120	No Sedentary	<2	<3	Inadequate	5.5	< 7 hrs	90.0288	Central obese	22	Depression	26	Anxiety	22	Stress	No	No	4.3	135	80	5.4	1.59615	2.99	1	No	No	No	No	No	No	0	0
1574	232.44	1_Johor	SMK MUNSHI SULAIMAN	27	Female	Chinese	Degree	Married	No	No	High	360	No Sedentary	<2	<3	Inadequate	7	7 hrs and above	68	No central obese	0	No Depression	0	No Anxiety	0	No Stress	No	No	4.6	110	70	4	0.8	2.24	1.4	No	No	No	No	No	No	0	0
1576	85.455	1_Johor	SEKOLAH TINGGI MUAR	59	Female	Chinese	Degree	Married	No	No	Moderate	120	No Sedentary	<2	<3	Inadequate	8	7 hrs and above	87	Central obese	2	No Depression	6	No Anxiety	6	No Stress	No	No	4.9	143	74	5.5	1.9	2.88	1.76	No	No	No	No	No	No	0	0
1577	85.455	1_Johor	SEKOLAH TINGGI MUAR	36	Male	Malay	Master and above	Married	Yes	No	Low	168	No Sedentary	<2	<3	Inadequate	6	< 7 hrs	88.5	No central obese	0	No Depression	2	No Anxiety	10	No Stress	No	No	5.2	133	87	6.1	1.4	3.87	1.59	No	No	No	No	No	No	0	0
1578	85.455	1_Johor	SEKOLAH TINGGI MUAR	46	Female	Malay	Degree	Married	No	No	High	720	sedentary	<2	<3	Inadequate	9	7 hrs and above	65	No central obese	10	Depression	12	Anxiety	14	Stress	No	No	4.7	104	65	4.6	0.7	2.77	1.51	No	No	No	No	No	No	0	0
1579	85.455	1_Johor	SEKOLAH TINGGI MUAR	34	Male	Malay	Master and above	Married	Yes	No	High	180	No Sedentary	<2	<3	Inadequate	5.5	< 7 hrs	99	Central obese	8	No Depression	8	Anxiety	12	No Stress	No	No	5.1	145	82	5.8	1.3	3.91	1.3	No	No	No	No	No	No	0	0
1580	85.455	1_Johor	SEKOLAH TINGGI MUAR	39	Female	Chinese	Degree	Married	Yes	No	Low	480	No Sedentary	<2	>=3	Inadequate	7.5	7 hrs and above	66	No central obese	4	No Depression	4	No Anxiety	10	No Stress	No	No	4.7	106	61	4.79231	0.9	2.95731	1.5	No	No	No	No	No	No	0	0
1581	85.455	1_Johor	SEKOLAH TINGGI MUAR	28	Male	Malay	Degree	Married	No	No	High	180	No Sedentary	<2	<3	Inadequate	5.5	< 7 hrs	85	No central obese	8	No Depression	8	Anxiety	12	No Stress	No	No	4.8	125	73	3.7	1.2	2.18	0.98	No	No	No	No	No	No	0	0
1582	85.455	1_Johor	SEKOLAH TINGGI MUAR	49	Male	Malay	Master and above	Married	No	No	High	60	No Sedentary	<2	<3	Inadequate	6	< 7 hrs	78	No central obese	0	No Depression	0	No Anxiety	2	No Stress	Yes	No	4.9	151	87	3.7	1.1	1.83	1.37	No	No	No	No	Yes	No	0	0
1583	85.455	1_Johor	SEKOLAH TINGGI MUAR	49	Male	Malay	Degree	Married	No	No	High	180	No Sedentary	<2	<3	Inadequate	5	< 7 hrs	71	No central obese	0	No Depression	0	No Anxiety	0	No Stress	No	No	4.7	112	68	8	1	5.42	2.13	No	No	No	No	No	No	0	0
1585	85.455	1_Johor	SEKOLAH TINGGI MUAR	55	Female	Malay	Degree	Married	No	No	Moderate	240	No Sedentary	<2	<3	Inadequate	5	< 7 hrs	94	Central obese	0	No Depression	2	No Anxiety	4	No Stress	No	No	5.3	131	66	6.2	1.8	3.54	1.84	No	No	No	No	No	Yes	0	0
1586	85.455	1_Johor	SEKOLAH TINGGI MUAR	35	Female	Malay	Master and above	Married	Yes	No	Moderate	161	No Sedentary	<2	<3	Inadequate	5.5	< 7 hrs	75.5	No central obese	8	No Depression	4	No Anxiety	10	No Stress	No	No	5.1	115	73	4.4	1	2.55	1.4	No	No	No	No	No	No	0	0
1587	85.455	1_Johor	SEKOLAH TINGGI MUAR	52	Female	Malay	Degree	Divorced/Widowed	No	No	Low	30	No Sedentary	<2	<3	Inadequate	6	< 7 hrs	88	Central obese	2	No Depression	10	Anxiety	16	Stress	No	No	5.5	126	75	5.6	1.1	3.54	1.56	No	No	No	No	No	Yes	0	0
1588	85.455	1_Johor	SEKOLAH TINGGI MUAR	52	Female	Malay	Degree	Married	Yes	No	Moderate	120	No Sedentary	>=2	<3	Inadequate	6	< 7 hrs	98	Central obese	1	No Depression	2	No Anxiety	2	No Stress	No	No	4.9	145.096	94	5.8	1.1	3.66	1.64	No	No	No	No	No	No	0	0
1592	85.455	1_Johor	SEKOLAH TINGGI MUAR	50	Male	Chinese	Degree	Married	Yes	No	Moderate	300	No Sedentary	<2	<3	Inadequate	5	< 7 hrs	92	Central obese	14	Depression	14	Anxiety	14	Stress	No	No	5.7	137	89	4.3	1.1	2.42	1.38	No	Yes	No	No	No	No	1	0
1593	85.455	1_Johor	SEKOLAH TINGGI MUAR	48	Female	Chinese	Degree	Single	Yes	No	High	780	sedentary	<2	<3	Inadequate	7.5	7 hrs and above	82	Central obese	1	No Depression	2	No Anxiety	3	No Stress	No	No	5.4	121	75	4	1.4	2.19	1.17	No	No	No	No	Yes	Yes	0	0
1594	85.455	1_Johor	SEKOLAH TINGGI MUAR	55	Female	Malay	Degree	Married	No	No	High	187	No Sedentary	>=2	<3	Inadequate	6	< 7 hrs	100	Central obese	1	No Depression	2	No Anxiety	2	No Stress	No	No	5	94	73	6.1	1.2	4	1.56	No	No	No	No	No	No	0	0
1595	85.455	1_Johor	SEKOLAH TINGGI MUAR	50	Female	Malay	Degree	Married	No	No	High	120	No Sedentary	<2	<3	Inadequate	6.14856	< 7 hrs	78.5	No central obese	0	No Depression	0	No Anxiety	2	No Stress	No	No	5	130	85	7.3	1.7	4.78	1.75	No	No	No	No	No	No	0	0
1596	85.455	1_Johor	SEKOLAH TINGGI MUAR	56	Male	Chinese	Degree	Married	No	No	Low	120	No Sedentary	<2	<3	Inadequate	6.5	< 7 hrs	87	No central obese	8	No Depression	12	Anxiety	14	Stress	No	Yes	4.6	129	74	5.6	1.4	3.77	1.19	No	No	No	No	No	No	0	0
1597	85.455	1_Johor	SEKOLAH TINGGI MUAR	32	Female	Malay	Degree	Married	Yes	No	Low	167	No Sedentary	<2	<3	Inadequate	7	7 hrs and above	61	No central obese	8	No Depression	8	Anxiety	12	No Stress	No	No	4.2	105	61	3.8	0.9	2.42673	1.99	No	No	Yes	No	No	No		1
1598	85.455	1_Johor	SEKOLAH TINGGI MUAR	40	Female	Malay	Degree	Married	Yes	Yes	Low	120	No Sedentary	<2	<3	Inadequate	6	< 7 hrs	94	Central obese	8	No Depression	8	Anxiety	6	No Stress	No	No	9.6	147	87	5.8	2.6	3.3	1.32	No	Yes	No	No	Yes	No		1
1599	85.455	1_Johor	SEKOLAH TINGGI MUAR	37	Female	Malay	Degree	Married	No	No	Low	240	No Sedentary	>=2	<3	Inadequate	6.32981	< 7 hrs	77.5	No central obese	6	No Depression	8	Anxiety	14	Stress	No	No	4.7	136	80	5.2	2	3.22	1.07	No	No	No	No	No	No	0	0
1601	85.455	1_Johor	SEKOLAH TINGGI MUAR	33	Male	Malay	Degree	Married	Yes	No	High	120	No Sedentary	>=2	<3	Inadequate	6.5	< 7 hrs	106	Central obese	8	No Depression	6	No Anxiety	6	No Stress	No	No	4.4	166	105	6.9	1.4	4.84	1.42	No	No	No	No	No	No	0	0
1602	85.455	1_Johor	SEKOLAH TINGGI MUAR	32	Male	Malay	Degree	Married	Yes	No	Low	202	No Sedentary	<2	<3	Inadequate	5.5	< 7 hrs	69	No central obese	0	No Depression	0	No Anxiety	2	No Stress	Yes	No	4.9	115	74	5.3	1.3	3.37	1.34	No	No	No	No	No	No	0	0
1603	85.455	1_Johor	SEKOLAH TINGGI MUAR	35	Female	Malay	Degree	Married	No	No	Low	174	No Sedentary	<2	<3	Inadequate	7.5	7 hrs and above	82.5	Central obese	10	Depression	14	Anxiety	12	No Stress	No	No	5.4	127	81	5.8	0.9	3.94	1.45	No	No	No	No	No	No	0	0
1604	85.455	1_Johor	SEKOLAH TINGGI MUAR	39	Female	Malay	Degree	Married	No	No	Low	300	No Sedentary	<2	<3	Inadequate	5	< 7 hrs	82.5	Central obese	2	No Depression	2	No Anxiety	8	No Stress	No	No	4.6	111	63	4.7	0.7	3.05	1.33	No	No	No	No	No	No	0	0
1605	85.455	1_Johor	SEKOLAH TINGGI MUAR	48	Male	Malay	Degree	Married	Yes	No	Low	197	No Sedentary	<2	<3	Inadequate	6	< 7 hrs	96	Central obese	0	No Depression	0	No Anxiety	0	No Stress	No	No	6.3	124	70	5.1	1.2	3.44	1.12	No	Yes	No	No	No	Yes		1
1606	85.455	1_Johor	SEKOLAH TINGGI MUAR	55	Female	Malay	Master and above	Single	No	No	Low	210	No Sedentary	>=2	<3	Inadequate	6.5	< 7 hrs	79	No central obese	4	No Depression	6	No Anxiety	6	No Stress	No	No	4.9	163	76	5.5	1.2	3.71	1.25	No	No	No	No	Yes	Yes	0	0
1609	114.556	1_Johor	SMK DATO' MOHD. YUNOS SULAIMAN	39	Female	Malay	Degree	Married	Yes	Yes	High	212	No Sedentary	<2	<3	Inadequate	5	< 7 hrs	87	Central obese	4	No Depression	16	Anxiety	6	No Stress	No	No	5.5	149	79	7	1.8	4.59	1.57	No	No	No	No	No	No	0	0
1610	114.556	1_Johor	SMK DATO' MOHD. YUNOS SULAIMAN	32	Female	Malay	Degree	Married	No	No	High	360	No Sedentary	<2	<3	Inadequate	7.5	7 hrs and above	73	No central obese	8	No Depression	8	Anxiety	10	No Stress	No	No	4.5	99	61	4.6	0.5	2.58	1.79	No	No	No	No	No	No	0	0
1611	114.556	1_Johor	SMK DATO' MOHD. YUNOS SULAIMAN	29	Female	Malay	Master and above	Single	Yes	No	Moderate	480	No Sedentary	<2	<3	Inadequate	5.5	< 7 hrs	86	Central obese	2	No Depression	4	No Anxiety	4	No Stress	No	No	5	124	74	7	2.4	4.83	1.05	No	No	No	No	No	No	0	0
1612	114.556	1_Johor	SMK DATO' MOHD. YUNOS SULAIMAN	46	Female	Malay	Degree	Married	Yes	No	Moderate	120	No Sedentary	>=2	<3	Inadequate	5	< 7 hrs	83	Central obese	8	No Depression	14	Anxiety	12	No Stress	No	No	7.3	157	87	4.6	0.8	2.74	1.49	No	Yes	No	No	No	No		1
1613	114.556	1_Johor	SMK DATO' MOHD. YUNOS SULAIMAN	28	Female	Malay	Degree	Single	Yes	No	Moderate	300	No Sedentary	<2	<3	Inadequate	5.5	< 7 hrs	76	No central obese	6	No Depression	12	Anxiety	14	Stress	No	No	5.2	129	79	4.9	1.3	3.07	1.25	No	No	No	No	No	No	0	0
1614	114.556	1_Johor	SMK DATO' MOHD. YUNOS SULAIMAN	50	Male	Malay	Degree	Married	No	No	Moderate	60	No Sedentary	<2	<3	Inadequate	5	< 7 hrs	92	Central obese	4	No Depression	4	No Anxiety	2	No Stress	No	No	5.1	138	89	3.6	0.7	2.67423	1.91	No	No	No	No	Yes	Yes	0	0
1616	114.556	1_Johor	SMK DATO' MOHD. YUNOS SULAIMAN	24	Female	Malay	Degree	Single	No	No	High	120	No Sedentary	<2	<3	Inadequate	5.5	< 7 hrs	60	No central obese	2	No Depression	8	Anxiety	10	No Stress	No	No	4.8	111	75	4.72692	0.3	1.66	1.29	No	No	No	No	No	No	0	0
1617	114.556	1_Johor	SMK DATO' MOHD. YUNOS SULAIMAN	23	Female	Malay	Degree	Single	No	No	High	120	No Sedentary	<2	<3	Inadequate	6.5	< 7 hrs	60	No central obese	2	No Depression	6	No Anxiety	10	No Stress	No	No	4.8	105	90	5	0.5	2.97	1.77	No	No	No	No	No	No	0	0
1618	114.556	1_Johor	SMK DATO' MOHD. YUNOS SULAIMAN	48	Male	Malay	Degree	Married	No	No	High	90	No Sedentary	<2	<3	Inadequate	6	< 7 hrs	87	No central obese	0	No Depression	8	Anxiety	6	No Stress	No	No	4.4	113	74	5	1.3	3.12	1.25	No	No	No	No	No	No	0	0
1619	114.556	1_Johor	SMK DATO' MOHD. YUNOS SULAIMAN	31	Female	Malay	Degree	Single	No	No	Low	600	sedentary	<2	<3	Inadequate	7	7 hrs and above	77.7788	No central obese	14	Depression	8	Anxiety	14	Stress	No	No	4.76154	137	95	4.6	0.6	2.19	2.11	No	No	No	No	No	No	0	0
1620	114.556	1_Johor	SMK DATO' MOHD. YUNOS SULAIMAN	42	Female	Malay	Degree	Married	Yes	No	Low	166	No Sedentary	<2	<3	Inadequate	7	7 hrs and above	78	No central obese	4	No Depression	20	Anxiety	18	Stress	No	No	5.1	102	70	5.2	2.1	3.13	1.08	No	No	No	No	No	No	0	0
1621	41.455	1_Johor	SMK SRI MERSING	33	Female	Malay	Degree	Married	No	No	Low	600	sedentary	<2	<3	Inadequate	7	7 hrs and above	66.5	No central obese	0	No Depression	4	No Anxiety	4	No Stress	No	No	4.5	111	61	4.5	0.4	2.45	1.9	No	No	No	No	No	No	0	0
1623	41.455	1_Johor	SMK SRI MERSING	27	Female	Malay	Degree	Married	No	No	Low	162	No Sedentary	<2	<3	Inadequate	5.5	< 7 hrs	65	No central obese	4	No Depression	2	No Anxiety	4	No Stress	No	No	5.3	128	80	5.4	1.4	3.13	1.7	No	No	No	No	No	No	0	0
1624	41.455	1_Johor	SMK SRI MERSING	28	Female	Malay	Degree	Married	Yes	No	Moderate	150	No Sedentary	<2	<3	Inadequate	6	< 7 hrs	78.8269	No central obese	6	No Depression	12	Anxiety	24	Stress	No	No	4	157	64	5	0.6	2.95	1.75	No	No	No	No	No	No	0	0
1626	41.455	1_Johor	SMK SRI MERSING	39	Female	Malay	Degree	Married	No	No	Low	172	No Sedentary	<2	<3	Inadequate	5.5	< 7 hrs	69.5	No central obese	12	Depression	20	Anxiety	16	Stress	No	No	5	120	77	4.6	0.6	2.83	1.51	No	No	No	No	No	No	0	0
1627	41.455	1_Johor	SMK SRI MERSING	25	Female	Malay	Degree	Single	Yes	No	Low	212	No Sedentary	<2	<3	Inadequate	8	7 hrs and above	66	No central obese	2	No Depression	4	No Anxiety	8	No Stress	No	No	4.7	118	80	4	0.4	2.22	1.64	No	No	No	No	No	No	0	0
1628	41.455	1_Johor	SMK SRI MERSING	27	Female	Malay	Degree	Single	Yes	No	High	240	No Sedentary	<2	<3	Inadequate	7	7 hrs and above	89	Central obese	4	No Depression	8	Anxiety	8	No Stress	No	No	5.1	102	73	6.5	0.6	5.01	1.23	No	No	No	No	No	No	0	0
1629	41.455	1_Johor	SMK SRI MERSING	49	Female	Malay	Degree	Married	No	No	High	180	No Sedentary	<2	<3	Inadequate	6.5	< 7 hrs	67	No central obese	2	No Depression	8	Anxiety	4	No Stress	No	No	5.4	104	68.4231	5	1.1	3.12	1.37	No	No	No	No	No	No	0	0
1631	41.455	1_Johor	SMK SRI MERSING	33	Male	Malay	Degree	Married	No	No	High	180	No Sedentary	<2	<3	Inadequate	6	< 7 hrs	80	No central obese	6	No Depression	0	No Anxiety	2	No Stress	No	No	4.9	123	78	5.1	2.1	2.98	1.13	No	No	No	No	No	No	0	0
1632	41.455	1_Johor	SMK SRI MERSING	44	Female	Malay	Degree	Married	Yes	Yes	Low	180	No Sedentary	<2	<3	Inadequate	7	7 hrs and above	67	No central obese	8	No Depression	12	Anxiety	8	No Stress	No	No	4.3	93	71.6154	5.5	0.8	3.67	1.43	No	No	Yes	Yes	No	Yes		1
1634	41.455	1_Johor	SMK SRI MERSING	42	Female	Malay	Degree	Married	No	No	High	330	No Sedentary	<2	<3	Inadequate	6.5	< 7 hrs	65	No central obese	4	No Depression	4	No Anxiety	6	No Stress	No	No	5.2	103	63	4	0.8	2.17	1.42	No	No	No	No	No	No	0	0
1640	41.455	1_Johor	SMK SRI MERSING	27	Female	Malay	Degree	Single	Yes	No	Low	20	No Sedentary	<2	>=3	Inadequate	7	7 hrs and above	70	No central obese	12	Depression	10	Anxiety	6	No Stress	No	No	4.9	108	70	4.3	0.7	2.64	1.4	No	No	No	No	No	No	0	0
1641	41.455	1_Johor	SMK SRI MERSING	59	Female	Malay	Degree	Married	Yes	No	Low	390	No Sedentary	<2	<3	Inadequate	6.26058	< 7 hrs	104	Central obese	2	No Depression	2	No Anxiety	0	No Stress	No	No	5	142	74	4.3	1	2.38	1.52	No	No	No	No	No	Yes	0	0
1642	41.455	1_Johor	SMK SRI MERSING	43	Female	Malay	Degree	Married	Yes	No	High	240	No Sedentary	<2	<3	Inadequate	6.5	< 7 hrs	70	No central obese	6	No Depression	4	No Anxiety	8	No Stress	No	No	4.6	112	76	5.1	0.9	3.25	1.45	No	No	No	No	No	No	0	0
1643	41.455	1_Johor	SMK SRI MERSING	25	Male	Chinese	Degree	Single	No	No	Low	120	No Sedentary	<2	<3	Inadequate	7.5	7 hrs and above	80	No central obese	2	No Depression	2	No Anxiety	2	No Stress	No	No	5.2	137	75	4.5	0.7	3	1.22	No	No	No	No	No	No	0	0
1644	41.455	1_Johor	SMK SRI MERSING	31	Female	Malay	Degree	Married	No	No	Low	240	No Sedentary	<2	>=3	Inadequate	6	< 7 hrs	79	No central obese	0	No Depression	0	No Anxiety	0	No Stress	No	No	4.6	115	85	5.4	0.8	3.24	1.83	No	No	No	No	No	No	0	0
1645	41.455	1_Johor	SMK SRI MERSING	30	Male	Malay	Degree	Married	No	No	Moderate	182	No Sedentary	>=2	<3	Inadequate	8	7 hrs and above	89	No central obese	18	Depression	22	Anxiety	14	Stress	No	No	5.4	126	76	6.4	0.8	4.59	1.43	No	No	No	No	No	No	0	0
1646	41.455	1_Johor	SMK SRI MERSING	32	Female	Malay	Degree	Single	No	No	High	195	No Sedentary	<2	<3	Inadequate	7	7 hrs and above	76	No central obese	12	Depression	6	No Anxiety	6	No Stress	No	No	4.7	99	71	5	0.8	3.43	1.17	No	No	No	No	No	No	0	0
1647	41.455	1_Johor	SMK SRI MERSING	27	Female	Malay	Degree	Single	No	No	High	420	No Sedentary	<2	>=3	Inadequate	7.5	7 hrs and above	76	No central obese	4	No Depression	2	No Anxiety	8	No Stress	No	No	4	120	84	4.7	0.4	3.08	1.48	No	No	No	No	No	No	0	0
1648	41.455	1_Johor	SMK SRI MERSING	53	Female	Malay	Degree	Single	Yes	No	Low	60	No Sedentary	<2	<3	Inadequate	6.5	< 7 hrs	88	Central obese	4	No Depression	8	Anxiety	2	No Stress	No	No	5.9	117	77	5.1	1.2	3.13	1.42	No	Yes	No	No	No	Yes	1	0
1649	41.455	1_Johor	SMK SRI MERSING	30	Female	Malay	Degree	Single	No	No	Low	480	No Sedentary	<2	<3	Inadequate	6	< 7 hrs	75	No central obese	12	Depression	2	No Anxiety	14	Stress	No	No	4.6	115	66	5.7	0.9	3.93	1.33	No	No	No	No	No	No	0	0
1650	41.455	1_Johor	SMK SRI MERSING	31	Female	Malay	Degree	Married	Yes	No	Moderate	200	No Sedentary	<2	<3	Inadequate	8.5	7 hrs and above	75	No central obese	10	Depression	8	Anxiety	10	No Stress	No	No	4.6	125	86	5	0.9	3.19	1.37	No	No	No	No	No	No	0	0
1652	41.455	1_Johor	SMK SRI MERSING	39	Female	Malay	Degree	Married	Yes	Yes	Low	142	No Sedentary	<2	<3	Inadequate	4.5	< 7 hrs	81	Central obese	12	Depression	16	Anxiety	16	Stress	No	No	5	143	99	6	1	3.44	2.07	No	No	No	No	No	No	0	0
1653	41.455	1_Johor	SMK SRI MERSING	28	Female	Malay	Diploma and below	Single	No	No	High	212	No Sedentary	>=2	>=3	Adequate	5.5	< 7 hrs	84	Central obese	6	No Depression	8	Anxiety	10	No Stress	No	No	4.7	114	77	5.2	0.8	3.25	1.56	No	No	No	No	No	No	0	0
1654	101.279	1_Johor	SMK BANDAR MAHARANI	51	Female	Malay	Degree	Married	No	No	Moderate	160	No Sedentary	<2	<3	Inadequate	6.5	< 7 hrs	86.4519	Central obese	4	No Depression	6	No Anxiety	4	No Stress	No	No	5.5	135	90	5.8	1.2	3.96	1.35	No	No	No	No	Yes	Yes	0	0
1655	101.279	1_Johor	SMK BANDAR MAHARANI	46	Female	Malay	Degree	Married	Yes	No	Low	180	No Sedentary	>=2	<3	Inadequate	5	< 7 hrs	100.5	Central obese	4	No Depression	6	No Anxiety	10	No Stress	No	No	5	148	75	4.7	1.5	2.71	1.33	No	No	No	No	Yes	No	0	0
1656	101.279	1_Johor	SMK BANDAR MAHARANI	32	Female	Malay	Degree	Single	No	No	Moderate	60	No Sedentary	<2	<3	Inadequate	6.5	< 7 hrs	87	Central obese	12	Depression	24	Anxiety	24	Stress	No	No	4.7	121	80	4.9	1.8	2.89	1.13	No	No	No	No	No	No	0	0
1658	101.279	1_Johor	SMK BANDAR MAHARANI	48	Male	Malay	Degree	Married	Yes	No	High	193	No Sedentary	>=2	<3	Inadequate	5	< 7 hrs	86	No central obese	8	No Depression	14	Anxiety	12	No Stress	No	No	6	146	69	6.9	0.8	5	1.53	No	Yes	No	No	Yes	Yes	1	0
1661	101.279	1_Johor	SMK BANDAR MAHARANI	33	Female	Malay	Degree	Married	No	No	Low	161	No Sedentary	<2	<3	Inadequate	5	< 7 hrs	68.2	No central obese	0	No Depression	6	No Anxiety	4	No Stress	No	No	4.7	125	74	5.2	0.7	3.38	1.54	No	No	No	No	No	No	0	0
1662	101.279	1_Johor	SMK BANDAR MAHARANI	33	Female	Malay	Degree	Married	Yes	No	Low	193	No Sedentary	<2	<3	Inadequate	6	< 7 hrs	73	No central obese	8	No Depression	6	No Anxiety	16	Stress	No	No	4.3	117	64	5.1	0.8	3.68	1.07	No	No	No	No	No	No	0	0
1663	101.279	1_Johor	SMK BANDAR MAHARANI	46	Female	Malay	Degree	Married	Yes	No	Moderate	780	sedentary	>=2	>=3	Adequate	5.5	< 7 hrs	86	Central obese	0	No Depression	10	Anxiety	6	No Stress	No	No	5.5	119	70	6.5	1.2	4.59	1.37	No	No	No	No	No	Yes	0	0
1664	101.279	1_Johor	SMK BANDAR MAHARANI	46	Female	Malay	Degree	Married	Yes	No	Low	233	No Sedentary	<2	<3	Inadequate	6.03077	< 7 hrs	81	Central obese	4	No Depression	6	No Anxiety	6	No Stress	No	No	9.2	123	73	5.1	2.1	2.67	1.49	No	Yes	No	No	No	No		1
1665	101.279	1_Johor	SMK BANDAR MAHARANI	33	Female	Malay	Degree	Married	No	No	Moderate	120	No Sedentary	<2	<3	Inadequate	8	7 hrs and above	69	No central obese	0	No Depression	2	No Anxiety	0	No Stress	No	No	4.3	104	70	4.5	0.6	2.8	1.38	No	No	No	No	No	No	0	0
1666	101.279	1_Johor	SMK BANDAR MAHARANI	45	Male	Malay	Degree	Married	No	No	High	120	No Sedentary	<2	<3	Inadequate	5.5	< 7 hrs	91.3	Central obese	4	No Depression	18	Anxiety	18	Stress	No	No	5	123	77	4.6	2.3	2.61	0.98	No	No	No	No	No	No	0	0
1667	101.279	1_Johor	SMK BANDAR MAHARANI	33	Female	Malay	Degree	Married	No	No	High	180	No Sedentary	<2	<3	Inadequate	4.5	< 7 hrs	62	No central obese	6	No Depression	6	No Anxiety	4	No Stress	No	No	4.5	117	66	4.2	0.4	2.63	1.38	No	No	No	No	No	No	0	0
1668	101.279	1_Johor	SMK BANDAR MAHARANI	43	Female	Malay	Degree	Married	Yes	No	High	220	No Sedentary	>=2	>=3	Adequate	5.5	< 7 hrs	72	No central obese	10	Depression	2	No Anxiety	10	No Stress	No	No	4.3	124	80	4.8	0.8	2.83	1.61	No	No	No	No	No	No	0	0
1669	101.279	1_Johor	SMK BANDAR MAHARANI	46	Female	Malay	Degree	Married	Yes	No	Moderate	120	No Sedentary	>=2	<3	Inadequate	5.5	< 7 hrs	93	Central obese	6	No Depression	12	Anxiety	8	No Stress	Yes	No	4.6	158	83	4.8	1.1	2.56	1.79	No	No	No	No	No	No	0	0
1670	101.279	1_Johor	SMK BANDAR MAHARANI	45	Female	Malay	Degree	Married	Yes	No	Moderate	180	No Sedentary	<2	<3	Inadequate	6	< 7 hrs	115	Central obese	8	No Depression	14	Anxiety	12	No Stress	No	No	5.9	137	88	4.8	2.4	2.62	1.07	No	Yes	No	No	No	No	1	0
1671	101.279	1_Johor	SMK BANDAR MAHARANI	28	Female	Malay	Degree	Married	No	No	High	150	No Sedentary	<2	>=3	Inadequate	7	7 hrs and above	78	No central obese	10	Depression	6	No Anxiety	14	Stress	No	No	4.6	115	68	4.74231	0.4	1.77	1.33	No	No	No	No	No	No	0	0
1672	101.279	1_Johor	SMK BANDAR MAHARANI	51	Female	Malay	Degree	Married	Yes	No	Low	120	No Sedentary	<2	<3	Inadequate	6.5	< 7 hrs	93	Central obese	4	No Depression	10	Anxiety	8	No Stress	No	No	4.6	143	92	4.6	0.8	2.58	1.64	No	No	No	No	No	No	0	0
1673	101.279	1_Johor	SMK BANDAR MAHARANI	45	Female	Malay	Degree	Married	Yes	No	High	120	No Sedentary	>=2	<3	Inadequate	5	< 7 hrs	91	Central obese	2	No Depression	4	No Anxiety	2	No Stress	No	No	5.9	127	75	5.8	2.1	3.56	1.31	No	Yes	No	No	No	No	1	0
1674	101.279	1_Johor	SMK BANDAR MAHARANI	54	Female	Chinese	Degree	Married	No	No	High	180	No Sedentary	<2	<3	Inadequate	5.5	< 7 hrs	69.5	No central obese	8	No Depression	6	No Anxiety	18	Stress	No	No	4.5	121	68	7.5	1.2	4.26	1.58808	No	No	No	No	No	No	0	0
1675	101.279	1_Johor	SMK BANDAR MAHARANI	57	Female	Malay	Degree	Married	Yes	No	Low	300	No Sedentary	<2	<3	Inadequate	5.5	< 7 hrs	89	Central obese	4	No Depression	12	Anxiety	14	Stress	No	No	5.2	157	85	5.4	0.9	3.1	1.94	No	No	No	No	No	Yes	0	0
1677	101.279	1_Johor	SMK BANDAR MAHARANI	41	Female	Malay	Degree	Married	Yes	No	Low	180	No Sedentary	<2	<3	Inadequate	6	< 7 hrs	68.5	No central obese	18	Depression	16	Anxiety	18	Stress	No	No	4.9	104	67	5	0.8	2.71	1.93	No	No	No	No	No	No	0	0
1678	101.279	1_Johor	SMK BANDAR MAHARANI	42	Male	Malay	Degree	Married	Yes	No	High	120	No Sedentary	<2	<3	Inadequate	6	< 7 hrs	79	No central obese	28	Depression	28	Anxiety	28	Stress	No	No	4.4	142	92	7.9	2.9	5.06	1.46	No	No	No	No	No	Yes	0	0
1679	101.279	1_Johor	SMK BANDAR MAHARANI	46	Male	Malay	Degree	Married	Yes	No	Moderate	90	No Sedentary	<2	<3	Inadequate	7	7 hrs and above	87	No central obese	0	No Depression	0	No Anxiety	2	No Stress	No	No	14.4	127	83	6.5	1.73846	3.3	1.28	Yes	No	Yes	Yes	No	Yes		1
1680	101.279	1_Johor	SMK BANDAR MAHARANI	47	Female	Indian	Master and above	Married	Yes	No	Low	192	No Sedentary	<2	<3	Inadequate	5.5	< 7 hrs	72	No central obese	1	No Depression	2	No Anxiety	3	No Stress	No	No	4.8	130	70	5.3	1	3.85	1.05	No	No	No	No	No	No	0	0
1681	43.345	1_Johor	SMK TAN SRI OSMAN MOHD SA'AT	35	Female	Malay	Degree	Married	No	No	High	180	No Sedentary	<2	<3	Inadequate	6	< 7 hrs	65	No central obese	0	No Depression	2	No Anxiety	8	No Stress	No	No	4.6	114	72	4	0.5	1.97	1.8	No	No	No	No	No	No	0	0
1682	43.345	1_Johor	SMK TAN SRI OSMAN MOHD SA'AT	54	Female	Malay	Degree	Married	No	No	Low	60	No Sedentary	>=2	<3	Inadequate	5.5	< 7 hrs	72	No central obese	0	No Depression	0	No Anxiety	2	No Stress	No	No	5.1	126	84	4.5	0.6	2.73	1.5	No	No	No	No	Yes	No	0	0
1683	43.345	1_Johor	SMK TAN SRI OSMAN MOHD SA'AT	50	Male	Malay	Degree	Married	Yes	No	Low	720	sedentary	<2	<3	Inadequate	5.5	< 7 hrs	103	Central obese	2	No Depression	4	No Anxiety	4	No Stress	No	No	5.8	128	95	7.3	1.5	5.42	1.2	No	Yes	No	No	No	No	1	0
1684	43.345	1_Johor	SMK TAN SRI OSMAN MOHD SA'AT	42	Female	Malay	Degree	Married	No	No	Moderate	189	No Sedentary	<2	<3	Inadequate	6.5	< 7 hrs	84	Central obese	0	No Depression	0	No Anxiety	4	No Stress	No	No	4.7	154	93	6.2	1.4	4.06	1.5	No	No	No	No	No	No	0	0
1685	43.345	1_Johor	SMK TAN SRI OSMAN MOHD SA'AT	42	Female	Malay	Degree	Married	No	No	Low	158	No Sedentary	<2	<3	Inadequate	8	7 hrs and above	79	No central obese	0	No Depression	0	No Anxiety	4	No Stress	No	No	5.4	135	91	5	1.2	3.56	0.9	No	No	No	No	No	No	0	0
1686	43.345	1_Johor	SMK TAN SRI OSMAN MOHD SA'AT	35	Female	Malay	Degree	Married	Yes	No	Low	185	No Sedentary	<2	<3	Inadequate	8	7 hrs and above	68	No central obese	0	No Depression	0	No Anxiety	4	No Stress	No	No	4.8	98	65	4.8	0.5	3.17	1.4	No	No	No	No	No	No	0	0
1687	43.345	1_Johor	SMK TAN SRI OSMAN MOHD SA'AT	48	Male	Malay	Diploma and below	Married	Yes	No	High	40	No Sedentary	<2	<3	Inadequate	6.5	< 7 hrs	94	Central obese	0	No Depression	6	No Anxiety	4	No Stress	No	No	4.6	135	85	5.2	1.2	3.46	1.2	No	No	No	No	No	No	0	0
1688	43.345	1_Johor	SMK TAN SRI OSMAN MOHD SA'AT	46	Female	Malay	Degree	Married	No	No	Low	212	No Sedentary	<2	<3	Inadequate	7	7 hrs and above	90	Central obese	24	Depression	20	Anxiety	22	Stress	No	No	6.1	133	77	4.4	1.2	2.56	1.3	No	Yes	No	No	No	No		1
1689	43.345	1_Johor	SMK TAN SRI OSMAN MOHD SA'AT	31	Male	Malay	Master and above	Married	Yes	No	Moderate	30	No Sedentary	<2	<3	Inadequate	7.5	7 hrs and above	99	Central obese	0	No Depression	4	No Anxiety	4	No Stress	No	No	4.4	123	82	6.4	1.54615	3.75	1.2	No	No	No	No	No	No	0	0
1690	43.345	1_Johor	SMK TAN SRI OSMAN MOHD SA'AT	31	Male	Indian	Degree	Married	Yes	No	Low	120	No Sedentary	<2	<3	Inadequate	5	< 7 hrs	109	Central obese	2	No Depression	2	No Anxiety	4	No Stress	No	No	5.8	128	72	5	1.1	3.5	1	No	Yes	No	No	No	No	1	0
1691	43.345	1_Johor	SMK TAN SRI OSMAN MOHD SA'AT	46	Female	Malay	Degree	Married	Yes	No	High	60	No Sedentary	<2	<3	Inadequate	6	< 7 hrs	84	Central obese	16	Depression	10	Anxiety	16	Stress	No	No	5.1	108	67	4.8	1	3.05	1.3	No	No	No	No	No	No	0	0
1692	43.345	1_Johor	SMK TAN SRI OSMAN MOHD SA'AT	35	Female	Malay	Degree	Married	Yes	No	Moderate	180	No Sedentary	<2	<3	Inadequate	6.5	< 7 hrs	78	No central obese	4	No Depression	8	Anxiety	16	Stress	No	No	4.5	132	86	5.9	0.6	4.23	1.4	No	No	No	No	No	No	0	0
1693	43.345	1_Johor	SMK TAN SRI OSMAN MOHD SA'AT	32	Male	Malay	Degree	Married	No	No	Low	189	No Sedentary	<2	<3	Inadequate	7	7 hrs and above	93	Central obese	12	Depression	10	Anxiety	14	Stress	No	No	5.1	131	78	6.1	1	4.25	1.4	No	No	No	No	No	No	0	0
1694	43.345	1_Johor	SMK TAN SRI OSMAN MOHD SA'AT	33	Female	Malay	Degree	Divorced/Widowed	No	No	Low	30	No Sedentary	<2	<3	Inadequate	6.5	< 7 hrs	76	No central obese	2	No Depression	0	No Anxiety	2	No Stress	No	No	5.5	125	78	5.2	0.6	3.43	1.5	No	No	No	No	No	No	0	0
1695	43.345	1_Johor	SMK TAN SRI OSMAN MOHD SA'AT	43	Male	Malay	Degree	Married	No	No	High	120	No Sedentary	<2	<3	Inadequate	5	< 7 hrs	112	Central obese	2	No Depression	2	No Anxiety	0	No Stress	No	No	5.1	161	89	6	1.1	4.3	1.2	No	No	No	No	No	Yes	0	0
1696	43.345	1_Johor	SMK TAN SRI OSMAN MOHD SA'AT	33	Male	Malay	Degree	Married	No	No	High	540	No Sedentary	>=2	<3	Inadequate	6	< 7 hrs	97	Central obese	0	No Depression	2	No Anxiety	0	No Stress	No	No	5.6	127	81	7.4	1.9	5.34	1.2	No	Yes	No	No	No	No	1	0
1697	43.345	1_Johor	SMK TAN SRI OSMAN MOHD SA'AT	49	Male	Malay	Degree	Married	No	No	Low	196	No Sedentary	<2	<3	Inadequate	6	< 7 hrs	87	No central obese	8	No Depression	2	No Anxiety	6	No Stress	Yes	No	4.7	125	76	5.1	2	3.19	1	No	No	No	No	No	No	0	0
1698	43.345	1_Johor	SMK TAN SRI OSMAN MOHD SA'AT	49	Male	Malay	Degree	Married	Yes	No	Moderate	120	No Sedentary	<2	<3	Inadequate	5	< 7 hrs	90	Central obese	14	Depression	28	Anxiety	24	Stress	No	No	4.9	149	90	6.2	1.6	3.87	1.6	No	No	No	No	Yes	Yes	0	0
1699	43.345	1_Johor	SMK TAN SRI OSMAN MOHD SA'AT	32	Female	Malay	Degree	Married	No	No	Low	185	No Sedentary	<2	<3	Inadequate	7.5	7 hrs and above	66	No central obese	0	No Depression	6	No Anxiety	6	No Stress	No	No	4.4	114	81	5.7	0.5	3.47	2	No	No	No	No	No	No	0	0
1700	43.345	1_Johor	SMK TAN SRI OSMAN MOHD SA'AT	38	Female	Malay	Degree	Married	No	No	Low	152	No Sedentary	<2	<3	Inadequate	5	< 7 hrs	95	Central obese	2	No Depression	10	Anxiety	16	Stress	No	No	4.9	133	84	4.4	0.8	2.24	1.8	No	No	No	No	No	No	0	0
1701	43.345	1_Johor	SMK TAN SRI OSMAN MOHD SA'AT	30	Female	Malay	Degree	Single	Yes	No	Moderate	20	No Sedentary	<2	<3	Inadequate	5	< 7 hrs	70	No central obese	28	Depression	28	Anxiety	30	Stress	No	No	4.9	114	60	5.3	0.7	3.38	1.6	No	No	No	No	No	No	0	0
1702	43.345	1_Johor	SMK TAN SRI OSMAN MOHD SA'AT	36	Female	Malay	Degree	Divorced/Widowed	No	No	Low	180	No Sedentary	<2	<3	Inadequate	8	7 hrs and above	64	No central obese	14	Depression	6	No Anxiety	12	No Stress	No	No	4.9	116	73	5.4	0.6	3.23	1.9	No	No	No	No	No	Yes	0	0
1703	43.345	1_Johor	SMK TAN SRI OSMAN MOHD SA'AT	33	Female	Chinese	Degree	Married	No	No	Low	208	No Sedentary	<2	<3	Inadequate	6.5	< 7 hrs	77	No central obese	12	Depression	8	Anxiety	14	Stress	No	No	4.7	111	71	5.2	0.9	3.39	1.4	No	No	No	No	No	No	0	0
1704	43.345	1_Johor	SMK TAN SRI OSMAN MOHD SA'AT	34	Female	Malay	Degree	Married	No	No	Low	120	No Sedentary	<2	<3	Inadequate	7	7 hrs and above	70	No central obese	0	No Depression	2	No Anxiety	6	No Stress	No	No	5	115	73	4.1	0.6	2.23	1.6	No	No	No	No	No	No	0	0
1705	43.345	1_Johor	SMK TAN SRI OSMAN MOHD SA'AT	37	Female	Malay	Diploma and below	Married	No	No	Moderate	172	No Sedentary	<2	>=3	Inadequate	5	< 7 hrs	87	Central obese	0	No Depression	10	Anxiety	6	No Stress	No	No	4.6	147	93	4.7	0.7	2.88	1.5	No	No	No	No	Yes	No	0	0
1706	43.345	1_Johor	SMK TAN SRI OSMAN MOHD SA'AT	35	Female	Malay	Degree	Married	No	No	High	120	No Sedentary	<2	<3	Inadequate	6.5	< 7 hrs	70	No central obese	8	No Depression	4	No Anxiety	8	No Stress	No	No	5.4	107	64	4.8	0.6	3.33	1.2	No	No	No	No	No	No	0	0
1707	43.345	1_Johor	SMK TAN SRI OSMAN MOHD SA'AT	39	Female	Malay	Degree	Married	Yes	No	Low	120	No Sedentary	<2	<3	Inadequate	6	< 7 hrs	91	Central obese	4	No Depression	4	No Anxiety	8	No Stress	No	No	4.9	121	86	5.1	1.31731	2.17	1.2	No	No	No	No	No	No	0	0
1708	43.345	1_Johor	SMK TAN SRI OSMAN MOHD SA'AT	26	Female	Malay	Degree	Single	Yes	No	Low	60	No Sedentary	<2	<3	Inadequate	5.5	< 7 hrs	80	Central obese	4	No Depression	4	No Anxiety	6	No Stress	No	No	5	119	86	4.4	0.6	2.93	1.2	No	No	No	No	No	No	0	0
1709	43.345	1_Johor	SMK TAN SRI OSMAN MOHD SA'AT	29	Male	Malay	Degree	Married	Yes	No	Moderate	840	sedentary	<2	<3	Inadequate	5	< 7 hrs	90	Central obese	6	No Depression	16	Anxiety	12	No Stress	No	No	5.4	132	75	6.3	1.6	4.57	1	No	No	No	No	No	No	0	0
1711	43.345	1_Johor	SMK TAN SRI OSMAN MOHD SA'AT	30	Male	Malay	Degree	Married	No	No	Low	166	No Sedentary	<2	<3	Inadequate	6	< 7 hrs	98	Central obese	4	No Depression	12	Anxiety	18	Stress	Yes	No	4.5	122	78	5.3	1.2	3.36	1.4	No	No	No	No	No	No	0	0
1712	43.345	1_Johor	SMK TAN SRI OSMAN MOHD SA'AT	35	Female	Malay	Degree	Married	No	No	Low	172	No Sedentary	<2	<3	Inadequate	6.5	< 7 hrs	67	No central obese	4	No Depression	12	Anxiety	8	No Stress	No	No	4.5	113	79	5.1	0.7	2.98	1.8	No	No	No	No	No	No	0	0
1713	43.345	1_Johor	SMK TAN SRI OSMAN MOHD SA'AT	32	Female	Malay	Degree	Married	No	No	Low	240	No Sedentary	<2	<3	Inadequate	6	< 7 hrs	72	No central obese	2	No Depression	4	No Anxiety	12	No Stress	No	No	5	108	76	4.6	0.8	2.94	1.3	No	No	No	No	No	No	0	0
1715	43.345	1_Johor	SMK TAN SRI OSMAN MOHD SA'AT	32	Female	Malay	Master and above	Married	Yes	No	Low	208	No Sedentary	<2	<3	Inadequate	5.5	< 7 hrs	95	Central obese	2	No Depression	8	Anxiety	10	No Stress	No	No	5.3	125	85	4.1	1	2.65	1	No	No	No	No	No	No	0	0
1716	43.345	1_Johor	SMK TAN SRI OSMAN MOHD SA'AT	40	Female	Malay	Degree	Married	Yes	No	Low	211	No Sedentary	<2	<3	Inadequate	6	< 7 hrs	79	No central obese	8	No Depression	4	No Anxiety	14	Stress	No	No	4.6	106	68	4.4	1	2.85	1.1	No	No	No	No	No	No	0	0
1718	42.778	1_Johor	SMK PARIT BUNGA	50	Female	Malay	Degree	Married	Yes	Yes	Moderate	217	No Sedentary	<2	<3	Inadequate	7	7 hrs and above	101.5	Central obese	4	No Depression	2	No Anxiety	4	No Stress	No	No	7.8	120	68	5.1	2.4	2.81	1.2	Yes	No	Yes	No	Yes	Yes		1
1719	42.778	1_Johor	SMK PARIT BUNGA	40	Female	Malay	Degree	Married	Yes	No	Moderate	184	No Sedentary	<2	<3	Inadequate	7	7 hrs and above	106.2	Central obese	0	No Depression	4	No Anxiety	4	No Stress	No	No	4.4	129	79	3.9	0.9	2.29	1.2	No	No	No	No	No	Yes	0	0
1720	42.778	1_Johor	SMK PARIT BUNGA	46	Female	Chinese	Degree	Single	Yes	No	High	120	No Sedentary	<2	<3	Inadequate	9	7 hrs and above	77.2	No central obese	6	No Depression	4	No Anxiety	10	No Stress	No	No	4.7	125	71	7	1.1	4.7	1.8	No	No	No	No	No	No	0	0
1721	42.778	1_Johor	SMK PARIT BUNGA	48	Male	Malay	Degree	Married	Yes	No	Moderate	60	No Sedentary	<2	<3	Inadequate	5	< 7 hrs	75.9	No central obese	0	No Depression	0	No Anxiety	0	No Stress	No	No	5.2	113	64	4.9	0.9	2.79	1.7	No	No	No	No	No	No	0	0
1722	42.778	1_Johor	SMK PARIT BUNGA	42	Female	Malay	Degree	Married	No	No	Moderate	120	No Sedentary	<2	<3	Inadequate	5.5	< 7 hrs	72.1	No central obese	18	Depression	10	Anxiety	14	Stress	No	No	5.2	120	71	4.4	0.4	2.12	2.1	No	No	No	No	No	No	0	0
1723	42.778	1_Johor	SMK PARIT BUNGA	44	Female	Malay	Degree	Married	Yes	No	Low	120	No Sedentary	<2	<3	Inadequate	6.5	< 7 hrs	73.4	No central obese	2	No Depression	4	No Anxiety	6	No Stress	No	No	5.2	111	69.6346	4.6	1	2.65	1.5	No	No	No	No	No	No	0	0
1724	42.778	1_Johor	SMK PARIT BUNGA	41	Female	Malay	Degree	Married	No	No	Low	120	No Sedentary	<2	<3	Inadequate	6.5	< 7 hrs	78.8	No central obese	2	No Depression	8	Anxiety	6	No Stress	No	No	5.2	149	87	5.9	0.7	2.98	1.53096	No	No	No	No	No	No	0	0
1725	42.778	1_Johor	SMK PARIT BUNGA	51	Male	Malay	Degree	Married	Yes	No	High	240	No Sedentary	<2	<3	Inadequate	6.5	< 7 hrs	97	Central obese	0	No Depression	2	No Anxiety	0	No Stress	No	No	6.4	126	71	4.6	0.9	3.09	1.1	No	Yes	No	No	No	No		1
1727	42.778	1_Johor	SMK PARIT BUNGA	34	Female	Malay	Degree	Single	Yes	No	Low	183	No Sedentary	<2	<3	Inadequate	5	< 7 hrs	107.1	Central obese	0	No Depression	0	No Anxiety	0	No Stress	No	No	6.4	142	93	6.7	1.4	4.86	1.2	No	Yes	No	No	No	No		1
1728	42.778	1_Johor	SMK PARIT BUNGA	34	Female	Malay	Degree	Married	No	No	High	156	No Sedentary	<2	<3	Inadequate	6.5	< 7 hrs	74.1	No central obese	6	No Depression	6	No Anxiety	12	No Stress	No	No	4.9	108	67	4.6	0.5	2.77	1.6	No	No	No	No	No	No	0	0
1729	42.778	1_Johor	SMK PARIT BUNGA	51	Male	Chinese	Degree	Married	Yes	No	Low	120	No Sedentary	<2	<3	Inadequate	8.5	7 hrs and above	92	Central obese	2	No Depression	6	No Anxiety	8	No Stress	No	No	5.3	138	87	5.7	1.3	4.01	1.1	No	No	No	No	Yes	No	0	0
1730	42.778	1_Johor	SMK PARIT BUNGA	30	Female	Malay	Degree	Married	No	No	Low	182	No Sedentary	<2	<3	Inadequate	5.5	< 7 hrs	72.5	No central obese	0	No Depression	16	Anxiety	16	Stress	No	No	4.7	116	73	5.2	1.7	2.83	1.6	No	No	No	No	No	No	0	0
1731	42.778	1_Johor	SMK PARIT BUNGA	40	Female	Malay	Degree	Married	No	No	High	180	No Sedentary	<2	<3	Inadequate	8	7 hrs and above	70	No central obese	6	No Depression	10	Anxiety	12	No Stress	No	No	5.3	127	77	4.7	2.2	2.5	1.2	No	No	No	No	No	No	0	0
1733	42.778	1_Johor	SMK PARIT BUNGA	40	Female	Malay	Diploma and below	Married	Yes	No	Low	360	No Sedentary	<2	<3	Inadequate	5.5	< 7 hrs	74.7	No central obese	6	No Depression	6	No Anxiety	8	No Stress	No	No	4.5	109	61	4.8	1.2	2.96	1.3	No	No	No	No	No	No	0	0
1734	42.778	1_Johor	SMK PARIT BUNGA	51	Female	Malay	Degree	Married	Yes	No	Low	212	No Sedentary	<2	<3	Inadequate	4	< 7 hrs	72	No central obese	10	Depression	12	Anxiety	18	Stress	No	No	4.4	117	65	5.5	1.1	3.1	1.9	No	No	No	No	No	No	0	0
1735	42.778	1_Johor	SMK PARIT BUNGA	39	Female	Malay	Degree	Married	No	No	Moderate	60	No Sedentary	<2	<3	Inadequate	7.5	7 hrs and above	78.1	No central obese	2	No Depression	8	Anxiety	6	No Stress	No	No	4.9	95	68.2885	4.6	0.7	2.78	1.5	No	No	No	No	No	No	0	0
1736	42.778	1_Johor	SMK PARIT BUNGA	28	Female	Chinese	Degree	Married	No	No	Moderate	120	No Sedentary	<2	<3	Inadequate	7.5	7 hrs and above	71	No central obese	8	No Depression	10	Anxiety	12	No Stress	No	No	4.7	118	60	4.3	0.5	2.67	1.4	No	No	No	No	No	No	0	0
1738	42.778	1_Johor	SMK PARIT BUNGA	40	Female	Malay	Degree	Single	No	No	Moderate	167	No Sedentary	<2	<3	Inadequate	6	< 7 hrs	91	Central obese	4	No Depression	2	No Anxiety	4	No Stress	No	No	4.7	154	89	4.9	1.4	3.06	1.2	No	No	No	No	No	No	0	0
1740	42.778	1_Johor	SMK PARIT BUNGA	32	Female	Malay	Degree	Married	Yes	No	High	120	No Sedentary	<2	<3	Inadequate	5	< 7 hrs	70	No central obese	0	No Depression	4	No Anxiety	2	No Stress	No	No	4.7	112	71	4.2	0.6	2.33	1.6	No	No	No	No	No	No	0	0
1741	42.778	1_Johor	SMK PARIT BUNGA	31	Female	Malay	Degree	Married	Yes	No	Low	60	No Sedentary	<2	<3	Inadequate	7.5	7 hrs and above	88	Central obese	4	No Depression	6	No Anxiety	4	No Stress	No	No	4.5	123	76	6.3	2.3	3.86	1.4	No	No	No	No	No	No	0	0
1742	42.778	1_Johor	SMK PARIT BUNGA	44	Female	Malay	Degree	Married	No	No	Low	420	No Sedentary	<2	<3	Inadequate	5.5	< 7 hrs	74.1	No central obese	10	Depression	8	Anxiety	14	Stress	No	No	4.2	101	60	5	0.9	3.09	1.5	No	No	No	No	No	No	0	0
1743	42.778	1_Johor	SMK PARIT BUNGA	32	Female	Malay	Degree	Married	No	No	High	180	No Sedentary	<2	<3	Inadequate	6.5	< 7 hrs	79.0096	No central obese	0	No Depression	2	No Anxiety	2	No Stress	No	No	4.4	124	74	4.4	1	2.55	1.4	No	No	No	No	No	No	0	0
1744	42.778	1_Johor	SMK PARIT BUNGA	32	Female	Malay	Degree	Married	No	No	High	120	No Sedentary	<2	<3	Inadequate	5.5	< 7 hrs	62	No central obese	14	Depression	16	Anxiety	18	Stress	No	No	4.2	98	70.3462	6.6	0.8	4.44	1.8	No	No	No	No	No	No	0	0
1745	72	1_Johor	SMK PAI CHEE	36	Female	Malay	Degree	Married	No	No	Moderate	141	No Sedentary	<2	<3	Inadequate	6	< 7 hrs	63	No central obese	0	No Depression	2	No Anxiety	6	No Stress	No	No	4.6	95	60	5.4	0.9	2.86	2.15	No	No	No	No	No	No	0	0
1746	72	1_Johor	SMK PAI CHEE	54	Female	Malay	Diploma and below	Married	No	No	Low	205	No Sedentary	<2	<3	Inadequate	5	< 7 hrs	97	Central obese	10	Depression	10	Anxiety	10	No Stress	No	No	5.2	137	64	4.3	1.6	2.3	1.24	No	No	No	No	No	No	0	0
1747	72	1_Johor	SMK PAI CHEE	34	Female	Malay	Master and above	Married	No	No	Moderate	300	No Sedentary	<2	<3	Inadequate	8.5	7 hrs and above	72	No central obese	0	No Depression	2	No Anxiety	4	No Stress	No	No	4.5	105	65	4	0.9	2.62	1.03	No	No	No	No	No	No	0	0
1748	72	1_Johor	SMK PAI CHEE	29	Female	Malay	Degree	Single	Yes	No	High	480	No Sedentary	<2	<3	Inadequate	7	7 hrs and above	111	Central obese	4	No Depression	10	Anxiety	8	No Stress	No	No	4.4	114	63	4.6	0.5	2.72	1.66	No	No	No	No	No	No	0	0
1749	72	1_Johor	SMK PAI CHEE	39	Female	Malay	Degree	Married	Yes	No	High	360	No Sedentary	<2	<3	Inadequate	5	< 7 hrs	88	Central obese	4	No Depression	2	No Anxiety	2	No Stress	No	No	4.8	115	73	4.5	0.3	2.75	1.14	No	No	No	No	No	No	0	0
1750	72	1_Johor	SMK PAI CHEE	33	Male	Malay	Degree	Married	No	No	High	240	No Sedentary	<2	<3	Inadequate	5.45625	< 7 hrs	87	No central obese	4	No Depression	2	No Anxiety	2	No Stress	No	No	4.8	116	70	4.5	0.8	2.95	1.23	No	No	No	No	No	No	0	0
1751	72	1_Johor	SMK PAI CHEE	28	Female	Malay	Degree	Married	Yes	No	Moderate	300	No Sedentary	<2	<3	Inadequate	6.5	< 7 hrs	76.5	No central obese	0	No Depression	4	No Anxiety	4	No Stress	No	No	4.7	127	70	4.6	1	2.76	1.37	No	No	No	No	No	No	0	0
1752	72	1_Johor	SMK PAI CHEE	29	Male	Malay	Degree	Married	Yes	No	Low	220	No Sedentary	<2	>=3	Inadequate	6.5	< 7 hrs	102	Central obese	16	Depression	16	Anxiety	18	Stress	No	No	6.2	115	75	6.7	2.7	4.32	1.17	No	Yes	No	No	No	No		1
1753	72	1_Johor	SMK PAI CHEE	38	Female	Malay	Degree	Married	Yes	No	Low	300	No Sedentary	<2	<3	Inadequate	6.5	< 7 hrs	74	No central obese	0	No Depression	4	No Anxiety	6	No Stress	No	No	5.1	113	77	7.1	1.3	5.15	1.35	No	No	No	No	No	No	0	0
1754	72	1_Johor	SMK PAI CHEE	53	Male	Malay	Degree	Married	No	No	Low	180	No Sedentary	<2	<3	Inadequate	5	< 7 hrs	105	Central obese	4	No Depression	6	No Anxiety	4	No Stress	No	No	12.4	163	98	5.8	1.3	3.94	1.28	No	Yes	No	No	No	No		1
1755	72	1_Johor	SMK PAI CHEE	55	Male	Chinese	Degree	Married	No	No	Low	226	No Sedentary	<2	<3	Inadequate	7.5	7 hrs and above	79	No central obese	12	Depression	11	Anxiety	14	Stress	No	No	5	155	94	5	1.6	3.03	1.24	No	No	No	No	Yes	No	0	0
1756	72	1_Johor	SMK PAI CHEE	33	Male	Malay	Degree	Married	Yes	No	Moderate	170	No Sedentary	<2	<3	Inadequate	6.5	< 7 hrs	91	Central obese	4	No Depression	14	Anxiety	12	No Stress	No	No	5.1	136	88	5.1	2	3.1	1.12	No	No	No	No	No	No	0	0
1757	72	1_Johor	SMK PAI CHEE	55	Male	Chinese	Degree	Married	No	No	High	183	No Sedentary	>=2	<3	Inadequate	7	7 hrs and above	97	Central obese	0	No Depression	6	No Anxiety	2	No Stress	No	Yes	5.9	167	74	4.8	0.9	2.81	1.56	No	Yes	No	No	Yes	No	1	0
1758	72	1_Johor	SMK PAI CHEE	35	Female	Malay	Degree	Married	Yes	Yes	Moderate	120	No Sedentary	<2	<3	Inadequate	5.5	< 7 hrs	84	Central obese	0	No Depression	2	No Anxiety	6	No Stress	No	No	4.6	124	69	6.4	1.8	4.28	1.27	No	No	No	No	No	No	0	0
1759	72	1_Johor	SMK PAI CHEE	54	Male	Malay	Diploma and below	Divorced/Widowed	Yes	No	Low	238	No Sedentary	<2	<3	Inadequate	6.18365	< 7 hrs	83	No central obese	8	No Depression	8	Anxiety	12	No Stress	No	No	5.4	108	69	5.5	0.8	4.09	1	No	No	No	No	No	No	0	0
1760	72	1_Johor	SMK PAI CHEE	41	Female	Chinese	Degree	Married	No	No	Low	193	No Sedentary	<2	<3	Inadequate	7	7 hrs and above	87	Central obese	4	No Depression	4	No Anxiety	4	No Stress	No	No	4.6	124	73	5.2	0.8	3.34	1.49	No	No	No	No	No	No	0	0
1762	72	1_Johor	SMK PAI CHEE	31	Female	Malay	Degree	Married	No	No	Moderate	175	No Sedentary	<2	<3	Inadequate	6.5	< 7 hrs	73.7212	No central obese	4	No Depression	16	Anxiety	18	Stress	No	No	4.3	114	70	5.4	0.8	3.5	1.6	No	No	No	No	No	No	0	0
1763	72	1_Johor	SMK PAI CHEE	27	Female	Malay	Diploma and below	Married	No	No	High	192	No Sedentary	<2	>=3	Inadequate	6.5	< 7 hrs	81	Central obese	2	No Depression	10	Anxiety	4	No Stress	No	No	4.4	103	59	3.7	0.5	2.12	1.39	No	No	No	No	No	No	0	0
1764	785.566	1_Johor	SMK PERMAS JAYA	51	Female	Chinese	Degree	Married	No	No	Low	210	No Sedentary	<2	>=3	Inadequate	6	< 7 hrs	88	Central obese	8	No Depression	6	No Anxiety	14	Stress	No	No	5.1	126	81	5.7	0.7	3.38	2	No	No	No	No	No	Yes	0	0
1765	785.566	1_Johor	SMK PERMAS JAYA	35	Female	Chinese	Master and above	Married	No	No	Low	480	No Sedentary	<2	<3	Inadequate	8	7 hrs and above	70	No central obese	10	Depression	4	No Anxiety	12	No Stress	No	No	4.2	106	60	3.7	0.5	2.27	1.2	No	No	No	No	No	No	0	0
1766	785.566	1_Johor	SMK PERMAS JAYA	51	Female	Chinese	Degree	Single	No	No	Moderate	120	No Sedentary	<2	<3	Inadequate	6.5	< 7 hrs	90	Central obese	0	No Depression	18	Anxiety	6	No Stress	No	No	5	136	69	5.4	1.4	3.16	1.6	No	No	No	No	Yes	No	0	0
1767	785.566	1_Johor	SMK PERMAS JAYA	45	Female	Malay	Degree	Married	Yes	No	Low	177	No Sedentary	<2	<3	Inadequate	4	< 7 hrs	93	Central obese	14	Depression	14	Anxiety	16	Stress	No	No	5.9	114	70	6.5	1.4	4.66	1.2	No	Yes	No	No	No	Yes	1	0
1769	785.566	1_Johor	SMK PERMAS JAYA	33	Male	Malay	Degree	Married	No	No	Low	163	No Sedentary	<2	<3	Inadequate	7	7 hrs and above	84	No central obese	0	No Depression	10	Anxiety	4	No Stress	No	No	4.6	119	78	5.05192	0.5	3.02904	2	No	No	No	No	No	No	0	0
1771	785.566	1_Johor	SMK PERMAS JAYA	25	Female	Chinese	Degree	Married	No	No	Moderate	100	No Sedentary	<2	<3	Inadequate	7.5	7 hrs and above	71	No central obese	8	No Depression	2	No Anxiety	4	No Stress	No	No	4.9	106	76	4.6	0.7	2.68	1.6	No	No	No	No	No	No	0	0
1775	48.125	1_Johor	SMK PEI HWA	49	Female	Malay	Diploma and below	Married	Yes	No	Low	248	No Sedentary	<2	<3	Inadequate	6	< 7 hrs	105.1	Central obese	0	No Depression	6	No Anxiety	6	No Stress	No	No	7.9	154	90	7.7	2.3	4.86	1.8	No	Yes	No	No	No	Yes		1
1776	48.125	1_Johor	SMK PEI HWA	45	Female	Chinese	Degree	Married	No	No	Low	180	No Sedentary	<2	>=3	Inadequate	7	7 hrs and above	68.6	No central obese	6	No Depression	2	No Anxiety	8	No Stress	No	No	4.4	133	79	4.5	1.6	2.65077	1.41288	No	No	No	No	No	No	0	0
1777	48.125	1_Johor	SMK PEI HWA	53	Female	Malay	Degree	Married	Yes	No	High	420	No Sedentary	>=2	<3	Inadequate	6	< 7 hrs	84	Central obese	6	No Depression	18	Anxiety	10	No Stress	No	No	5.7	122	68	5.2	0.5	3.37	1.6	No	Yes	No	No	No	No	1	0
1778	48.125	1_Johor	SMK PEI HWA	49	Female	Malay	Degree	Married	Yes	No	Moderate	180	No Sedentary	<2	<3	Inadequate	6.5	< 7 hrs	86	Central obese	6	No Depression	8	Anxiety	12	No Stress	No	No	4.8	114	66	5.6	2.2	3.1	1.5	No	No	No	No	No	No	0	0
1779	48.125	1_Johor	SMK PEI HWA	47	Female	Malay	Degree	Divorced/Widowed	Yes	No	Moderate	150	No Sedentary	<2	<3	Inadequate	5	< 7 hrs	82.5	Central obese	4	No Depression	6	No Anxiety	8	No Stress	No	No	4.6	129	72	4.7	0.8	2.84	1.5	No	No	No	No	No	No	0	0
1780	48.125	1_Johor	SMK PEI HWA	31	Female	Malay	Degree	Married	Yes	No	Moderate	240	No Sedentary	<2	<3	Inadequate	7	7 hrs and above	76.5	No central obese	6	No Depression	12	Anxiety	10	No Stress	No	No	4.5	108	71	4.6	1.2	3.06	1	No	No	No	No	No	No	0	0
1781	48.125	1_Johor	SMK PEI HWA	48	Female	Malay	Degree	Married	Yes	No	Low	187	No Sedentary	<2	<3	Inadequate	7	7 hrs and above	89.5	Central obese	22	Depression	8	Anxiety	16	Stress	No	No	5.5	144	70	5.1	0.8	3.34	1.4	No	No	No	No	No	No	0	0
1782	48.125	1_Johor	SMK PEI HWA	29	Female	Malay	Degree	Married	No	No	High	90	No Sedentary	<2	<3	Inadequate	7.5	7 hrs and above	65.1	No central obese	4	No Depression	8	Anxiety	8	No Stress	No	No	4.64808	114	68	4.1	0.3	2.46	1.5	No	No	No	No	No	No	0	0
1783	48.125	1_Johor	SMK PEI HWA	35	Female	Malay	Degree	Married	No	No	High	270	No Sedentary	<2	<3	Inadequate	6.11827	< 7 hrs	81.1	Central obese	8	No Depression	10	Anxiety	14	Stress	No	No	5.7	129	81	5.4	1.2	3.36	1.5	No	Yes	No	No	No	No	1	0
1784	48.125	1_Johor	SMK PEI HWA	30	Female	Malay	Degree	Married	Yes	No	Moderate	169	No Sedentary	<2	<3	Inadequate	6.5	< 7 hrs	66	No central obese	4	No Depression	14	Anxiety	6	No Stress	No	No	4.1	107	66	4.6	0.6	2.43	1.9	No	No	No	No	No	No	0	0
1785	48.125	1_Johor	SMK PEI HWA	42	Female	Malay	Degree	Married	No	No	Low	186	No Sedentary	<2	<3	Inadequate	7.5	7 hrs and above	72	No central obese	24	Depression	30	Anxiety	28	Stress	No	No	4.8	115	71	5	0.5	3.07	1.7	No	No	No	No	No	No	0	0
1786	48.125	1_Johor	SMK PEI HWA	57	Female	Chinese	Degree	Single	No	No	Moderate	220	No Sedentary	<2	<3	Inadequate	7	7 hrs and above	66.5	No central obese	2	No Depression	12	Anxiety	14	Stress	No	No	4.5	105	64	5.2	1.3	2.81	1.8	No	No	No	No	No	Yes	0	0
1787	48.125	1_Johor	SMK PEI HWA	48	Female	Chinese	Degree	Married	No	No	Moderate	30	No Sedentary	>=2	<3	Inadequate	6	< 7 hrs	77	No central obese	28	Depression	18	Anxiety	28	Stress	No	Yes	4.7	122	83	5.4	1.8	3.08	1.5	No	No	No	No	Yes	No	0	0
1788	48.125	1_Johor	SMK PEI HWA	43	Female	Chinese	Degree	Married	Yes	No	High	60	No Sedentary	<2	<3	Inadequate	7	7 hrs and above	68	No central obese	0	No Depression	2	No Anxiety	6	No Stress	No	No	4.9	99	65	4.5	0.9	2.09	2	No	No	No	No	No	No	0	0
1789	48.125	1_Johor	SMK PEI HWA	49	Female	Chinese	Degree	Single	Yes	No	Moderate	240	No Sedentary	<2	>=3	Inadequate	5	< 7 hrs	92	Central obese	2	No Depression	4	No Anxiety	4	No Stress	No	No	8.4	133	86	3.6	0.9	2.09	1.1	No	Yes	No	No	No	No		1
1790	48.125	1_Johor	SMK PEI HWA	29	Female	Malay	Degree	Married	No	No	High	60	No Sedentary	<2	>=3	Inadequate	6.5	< 7 hrs	66	No central obese	6	No Depression	12	Anxiety	12	No Stress	No	No	4.4	116	70	3.6	0.4	1.82	1.6	No	No	No	No	No	No	0	0
1791	48.125	1_Johor	SMK PEI HWA	48	Female	Chinese	Degree	Single	Yes	No	Moderate	240	No Sedentary	<2	>=3	Inadequate	5.5	< 7 hrs	75	No central obese	10	Depression	8	Anxiety	18	Stress	No	No	5.1	114	73	5.9	1.4	3.66	1.6	No	No	No	No	No	Yes	0	0
1792	48.125	1_Johor	SMK PEI HWA	36	Female	Malay	Degree	Married	No	No	Moderate	240	No Sedentary	<2	<3	Inadequate	7	7 hrs and above	68	No central obese	6	No Depression	10	Anxiety	14	Stress	No	No	5.1	110	71	5.3	0.7	3.38	1.6	No	No	No	No	No	No	0	0
1793	48.125	1_Johor	SMK PEI HWA	26	Female	Malay	Degree	Married	Yes	No	High	240	No Sedentary	<2	<3	Inadequate	8.5	7 hrs and above	71.6	No central obese	4	No Depression	4	No Anxiety	12	No Stress	No	No	4.6	104	68	3.7	0.5	1.67	1.8	No	No	No	No	No	No	0	0
1794	48.125	1_Johor	SMK PEI HWA	44	Female	Malay	Degree	Married	Yes	No	High	240	No Sedentary	>=2	<3	Inadequate	6	< 7 hrs	73	No central obese	10	Depression	10	Anxiety	10	No Stress	No	No	4.5	133	84	5.7	1.2	3.16	2	No	No	No	No	No	No	0	0
1795	48.125	1_Johor	SMK PEI HWA	38	Female	Chinese	Degree	Married	No	No	Moderate	30	No Sedentary	>=2	<3	Inadequate	7.5	7 hrs and above	76	No central obese	0	No Depression	4	No Anxiety	4	No Stress	No	No	4.4	115	75	5.6	1	3.75	1.4	No	No	No	No	No	No	0	0
1796	48.125	1_Johor	SMK PEI HWA	44	Female	Malay	Degree	Married	Yes	No	Moderate	147	No Sedentary	<2	<3	Inadequate	6	< 7 hrs	86.5	Central obese	0	No Depression	0	No Anxiety	2	No Stress	No	No	5.6	129	77	5.3	0.6	3.63	1.4	No	Yes	No	No	No	No	1	0
1797	48.125	1_Johor	SMK PEI HWA	38	Female	Malay	Degree	Married	No	No	Low	189	No Sedentary	<2	<3	Inadequate	6.5	< 7 hrs	89.5	Central obese	4	No Depression	0	No Anxiety	4	No Stress	No	No	4.6	106	66	4.9	1	3.25	1.2	No	No	No	No	No	No	0	0
1798	48.125	1_Johor	SMK PEI HWA	48	Female	Malay	Degree	Married	Yes	Yes	Moderate	171	No Sedentary	<2	>=3	Inadequate	5	< 7 hrs	90.5	Central obese	0	No Depression	0	No Anxiety	0	No Stress	No	No	4.4	127	76	4.99808	0.8	2.14	1	No	No	No	No	No	No	0	0
1799	48.125	1_Johor	SMK SERI PINANG	41	Male	Malay	Degree	Married	Yes	No	Low	120	No Sedentary	<2	<3	Inadequate	6	< 7 hrs	84	No central obese	4	No Depression	6	No Anxiety	10	No Stress	No	No	4.9	118	81	6	0.9	4.03	1.56	No	No	No	No	No	No	0	0
1800	48.125	1_Johor	SMK SERI PINANG	35	Female	Malay	Degree	Married	Yes	No	Moderate	60	No Sedentary	<2	<3	Inadequate	6.5	< 7 hrs	71	No central obese	4	No Depression	10	Anxiety	14	Stress	No	No	4.5	133	79	5.4	0.7	3.78	1.32	No	No	No	No	No	No	0	0
1801	48.125	1_Johor	SMK SERI PINANG	37	Female	Malay	Master and above	Married	Yes	No	Low	180	No Sedentary	<2	<3	Inadequate	5.5	< 7 hrs	66	No central obese	4	No Depression	8	Anxiety	6	No Stress	No	No	4.7	114	76	5.5	1	3.59	1.41	No	No	No	No	No	No	0	0
1802	48.125	1_Johor	SMK SERI PINANG	43	Female	Malay	Degree	Married	No	No	High	220	No Sedentary	>=2	<3	Inadequate	6	< 7 hrs	69	No central obese	4	No Depression	4	No Anxiety	8	No Stress	No	No	4.3	138	87	4.6	1.1	2.65	1.46	No	No	No	No	No	No	0	0
1803	48.125	1_Johor	SMK SERI PINANG	33	Female	Malay	Degree	Married	Yes	No	Low	300	No Sedentary	<2	<3	Inadequate	7	7 hrs and above	87	Central obese	0	No Depression	6	No Anxiety	6	No Stress	No	No	15.1	108	70	5.4	1.2	3.61	1.29	No	Yes	No	No	No	No		1
1805	48.125	1_Johor	SMK SERI PINANG	31	Female	Malay	Degree	Married	Yes	No	Moderate	60	No Sedentary	<2	<3	Inadequate	7	7 hrs and above	70	No central obese	6	No Depression	8	Anxiety	6	No Stress	No	No	4.2	118	70	5.1	0.7	3.32	1.5	No	No	No	No	No	No	0	0
1806	48.125	1_Johor	SMK SERI PINANG	27	Female	Malay	Degree	Married	No	No	Low	120	No Sedentary	<2	<3	Inadequate	7.5	7 hrs and above	61	No central obese	2	No Depression	6	No Anxiety	2	No Stress	No	No	4.1	111	65	4.9	0.8	3.06	1.49	No	No	No	No	No	No	0	0
1807	48.125	1_Johor	SMK SERI PINANG	31	Female	Malay	Degree	Married	Yes	No	Low	60	No Sedentary	<2	<3	Inadequate	6	< 7 hrs	88	Central obese	4	No Depression	4	No Anxiety	6	No Stress	No	No	4.1	113	68	4	1	2.25	1.27	No	No	No	No	No	No	0	0
1808	48.125	1_Johor	SMK SERI PINANG	38	Female	Malay	Degree	Married	Yes	No	Moderate	120	No Sedentary	<2	>=3	Inadequate	6.5	< 7 hrs	77	No central obese	0	No Depression	6	No Anxiety	2	No Stress	No	No	4.8	122	80	3.7	0.7	2	1.36	No	No	No	No	No	No	0	0
1809	48.125	1_Johor	SMK SERI PINANG	53	Female	Malay	Degree	Married	Yes	No	High	90	No Sedentary	>=2	<3	Inadequate	5	< 7 hrs	76	No central obese	2	No Depression	10	Anxiety	12	No Stress	No	No	8.86154	126	83	6.7	1.8	4.68	1.19	Yes	No	Yes	Yes	No	Yes		1
1810	48.125	1_Johor	SMK SERI PINANG	41	Female	Malay	Degree	Married	Yes	Yes	Low	30	No Sedentary	<2	<3	Inadequate	6	< 7 hrs	69	No central obese	4	No Depression	6	No Anxiety	6	No Stress	No	No	4.9	138	80	3.7	0.5	2.06	1.47	No	No	No	No	No	No	0	0
1811	48.125	1_Johor	SMK SERI PINANG	33	Female	Malay	Degree	Married	Yes	No	High	60	No Sedentary	<2	<3	Inadequate	5.5	< 7 hrs	67	No central obese	4	No Depression	14	Anxiety	12	No Stress	No	No	4.3	103	67.0962	4.5	0.4	2.5	1.86	No	No	No	No	No	No	0	0
1813	48.125	1_Johor	SMK SERI PINANG	36	Female	Malay	Degree	Married	Yes	No	Low	60	No Sedentary	<2	<3	Inadequate	8.5	7 hrs and above	73	No central obese	12	Depression	14	Anxiety	16	Stress	No	No	4.6	116	75	4.3	0.6	2.87	1.19	No	No	No	No	No	No	0	0
1814	123.368	1_Johor	SMK PEKAN NENAS	37	Female	Malay	Degree	Married	No	No	Moderate	195	No Sedentary	<2	<3	Inadequate	7.5	7 hrs and above	71	No central obese	6	No Depression	18	Anxiety	14	Stress	No	No	4.8	128	77	5.2	0.7	3.04	1.84	No	No	No	No	No	No	0	0
1815	123.368	1_Johor	SMK PEKAN NENAS	33	Female	Malay	Degree	Married	Yes	No	High	166	No Sedentary	<2	<3	Inadequate	8	7 hrs and above	71	No central obese	0	No Depression	4	No Anxiety	8	No Stress	No	No	4.9	142	96	4.2	0.4	2.38	1.64	No	No	No	No	No	No	0	0
1816	123.368	1_Johor	SMK PEKAN NENAS	27	Female	Malay	Degree	Married	Yes	No	Low	180	No Sedentary	<2	<3	Inadequate	6	< 7 hrs	62	No central obese	14	Depression	14	Anxiety	12	No Stress	No	No	4.4	114	73	4.2	0.4	2.22	1.8	No	No	No	No	No	No	0	0
1817	123.368	1_Johor	SMK PEKAN NENAS	45	Female	Malay	Degree	Married	Yes	Yes	Low	480	No Sedentary	<2	<3	Inadequate	5.5	< 7 hrs	83	Central obese	22	Depression	20	Anxiety	24	Stress	No	No	4.7	143	90	5.5	1.69038	3.38385	1.15	No	No	No	No	Yes	No	0	0
1819	123.368	1_Johor	SMK PEKAN NENAS	61	Male	Chinese	Degree	Married	Yes	No	Moderate	360	No Sedentary	<2	<3	Inadequate	8	7 hrs and above	79	No central obese	16	Depression	10	Anxiety	20	Stress	No	No	4.7	130	76	5.1	1.5	2.64	1.78	No	No	No	No	Yes	Yes	0	0
1820	123.368	1_Johor	SMK PEKAN NENAS	47	Male	Malay	Master and above	Married	No	No	Low	179	No Sedentary	>=2	>=3	Adequate	6	< 7 hrs	86	No central obese	4	No Depression	8	Anxiety	4	No Stress	No	No	5.7	152	78	7.5	2.3	5.11	1.35	No	Yes	No	No	No	No	1	0
1822	123.368	1_Johor	SMK PEKAN NENAS	42	Female	Malay	Degree	Married	No	Yes	Moderate	247	No Sedentary	<2	<3	Inadequate	5.5	< 7 hrs	80	Central obese	4	No Depression	18	Anxiety	14	Stress	Yes	No	5.8	165	108	5.4	3	2.97	1.07	No	Yes	No	No	Yes	No	1	0
1823	123.368	1_Johor	SMK PEKAN NENAS	29	Female	Chinese	Degree	Single	No	No	High	240	No Sedentary	<2	<3	Inadequate	7	7 hrs and above	69	No central obese	0	No Depression	2	No Anxiety	4	No Stress	No	Yes	4.61154	111	71	6.7	0.6	4.62	1.81	No	No	No	No	No	No	0	0
1824	123.368	1_Johor	SMK PEKAN NENAS	43	Male	Malay	Degree	Married	No	No	Moderate	900	sedentary	<2	<3	Inadequate	6	< 7 hrs	81	No central obese	4	No Depression	10	Anxiety	14	Stress	No	No	4.7	132	88	5.3	0.9	3.76	1.13	No	No	No	No	No	No	0	0
1825	123.368	1_Johor	SMK PEKAN NENAS	28	Female	Malay	Degree	Married	Yes	No	Moderate	60	No Sedentary	<2	<3	Inadequate	6.5	< 7 hrs	74	No central obese	2	No Depression	4	No Anxiety	4	No Stress	No	No	4.7	117	84	5.3	0.7	3.32	1.66	No	No	No	No	No	No	0	0
1826	123.368	1_Johor	SMK PEKAN NENAS	29	Female	Malay	Degree	Married	No	No	Moderate	30	No Sedentary	<2	<3	Inadequate	8	7 hrs and above	93	Central obese	0	No Depression	2	No Anxiety	10	No Stress	No	No	5.2	142	91	5.8	1	4.24	1.11	No	No	No	No	No	No	0	0
1827	105	1_Johor	SMK PESISIRAN PERDANA	45	Female	Chinese	Degree	Married	No	No	Moderate	120	No Sedentary	>=2	<3	Inadequate	8	7 hrs and above	74.5	No central obese	12	Depression	18	Anxiety	22	Stress	No	No	5.4	118	77	6.2	1.3	4.01	1.6	No	No	No	No	No	No	0	0
1828	105	1_Johor	SMK PESISIRAN PERDANA	28	Female	Malay	Degree	Married	No	No	Low	166	No Sedentary	<2	<3	Inadequate	5.5	< 7 hrs	73	No central obese	8	No Depression	14	Anxiety	16	Stress	No	No	4.3	97	61	4.9	0.6	2.73	1.9	No	No	No	No	No	No	0	0
1832	105	1_Johor	SMK PESISIRAN PERDANA	55	Male	Malay	Master and above	Married	Yes	No	Moderate	60	No Sedentary	<2	>=3	Inadequate	5	< 7 hrs	83	No central obese	0	No Depression	0	No Anxiety	0	No Stress	Yes	No	5.3	120	72	6.6	1.59231	3.81	1.2	No	No	No	No	No	Yes	0	0
1833	105	1_Johor	SMK PESISIRAN PERDANA	42	Female	Malay	Degree	Married	Yes	No	High	60	No Sedentary	<2	>=3	Inadequate	7	7 hrs and above	92	Central obese	2	No Depression	2	No Anxiety	0	No Stress	No	No	5.8	140	92	4.7	1.3	3.01	1.1	No	Yes	No	No	No	No	1	0
1834	105	1_Johor	SMK PESISIRAN PERDANA	47	Female	Malay	Degree	Married	No	No	Low	182	No Sedentary	<2	<3	Inadequate	7.5	7 hrs and above	67	No central obese	0	No Depression	4	No Anxiety	2	No Stress	No	No	5	110	64	6.1	1.2	3.26	2.3	No	No	No	No	No	Yes	0	0
1835	105	1_Johor	SMK PESISIRAN PERDANA	56	Male	Malay	Degree	Married	No	No	High	180	No Sedentary	<2	<3	Inadequate	6	< 7 hrs	96	Central obese	18	Depression	12	Anxiety	16	Stress	No	No	8	150	101	5.9	2.6	3.52	1.2	Yes	No	Yes	No	Yes	Yes		1
1836	105	1_Johor	SMK PESISIRAN PERDANA	27	Female	Malay	Degree	Married	No	No	Low	173	No Sedentary	<2	<3	Inadequate	6	< 7 hrs	109	Central obese	4	No Depression	6	No Anxiety	10	No Stress	No	No	4.3	133	77	4.5	2.2	2.5	1	No	No	No	No	No	No	0	0
1837	105	1_Johor	SMK PESISIRAN PERDANA	56	Male	Malay	Degree	Married	No	No	Low	156	No Sedentary	<2	>=3	Inadequate	5.5	< 7 hrs	83	No central obese	0	No Depression	2	No Anxiety	2	No Stress	No	No	5.3	129	80	3.9	1.4	2.16	1.1	No	No	No	No	No	Yes	0	0
1838	200.239	1_Johor	SMK SERI PERDANA	23	Female	Malay	Degree	Single	Yes	No	Low	220	No Sedentary	<2	<3	Inadequate	6	< 7 hrs	72	No central obese	2	No Depression	10	Anxiety	6	No Stress	No	No	4.4	117	84	4.1	0.5	2.17	1.7	No	No	No	No	No	No	0	0
1839	200.239	1_Johor	SMK SERI PERDANA	27	Female	Malay	Degree	Married	No	No	Moderate	120	No Sedentary	<2	<3	Inadequate	6.5	< 7 hrs	73	No central obese	2	No Depression	12	Anxiety	8	No Stress	No	No	4.8	113	70	5.6	0.7	3.58	1.7	No	No	No	No	No	No	0	0
1840	200.239	1_Johor	SMK SERI PERDANA	32	Female	Malay	Degree	Married	No	No	Moderate	60	No Sedentary	<2	<3	Inadequate	7	7 hrs and above	75	No central obese	12	Depression	20	Anxiety	20	Stress	No	No	4.6	114	71	6.3	0.8	4.44	1.5	No	No	No	No	No	No	0	0
1843	200.239	1_Johor	SMK SERI PERDANA	45	Female	Malay	Degree	Married	Yes	No	Moderate	120	No Sedentary	<2	<3	Inadequate	7	7 hrs and above	79	No central obese	12	Depression	14	Anxiety	10	No Stress	No	No	4.8	113	63	7	1	4.95	1.6	No	No	Yes	No	Yes	No		1
1846	200.239	1_Johor	SMK SERI PERDANA	51	Male	Malay	Degree	Married	Yes	No	High	480	No Sedentary	>=2	<3	Inadequate	5.5	< 7 hrs	93	Central obese	4	No Depression	10	Anxiety	8	No Stress	No	No	6.7	115	76	4.6	1.5	2.52	1.4	No	No	Yes	Yes	Yes	No		1
1847	200.239	1_Johor	SMK SERI PERDANA	33	Female	Malay	Degree	Married	Yes	No	Moderate	30	No Sedentary	<2	<3	Inadequate	5.5	< 7 hrs	87	Central obese	20	Depression	28	Anxiety	24	Stress	No	No	4.4	110	75	5.4	1.4	3.46	1.3	No	No	No	No	No	Yes	0	0
1848	200.239	1_Johor	SMK SERI PERDANA	44	Male	Malay	Degree	Married	Yes	No	Low	162	No Sedentary	<2	<3	Inadequate	6	< 7 hrs	95	Central obese	4	No Depression	4	No Anxiety	4	No Stress	No	No	5.1	141	81	6.1	2.8	3.73	1.1	No	No	No	No	No	No	0	0
1850	200.239	1_Johor	SMK SERI PERDANA	30	Male	Malay	Degree	Married	No	No	Moderate	720	sedentary	<2	<3	Inadequate	5.97356	< 7 hrs	102	Central obese	1	No Depression	2	No Anxiety	2	No Stress	Yes	No	4.6	141	86	4.9	1.5	3.22	1	No	No	No	No	No	No	0	0
1851	200.239	1_Johor	SMK SERI PERDANA	56	Female	Malay	Degree	Married	Yes	No	Moderate	120	No Sedentary	<2	<3	Inadequate	6	< 7 hrs	84	Central obese	0	No Depression	0	No Anxiety	0	No Stress	No	No	9.5	145	70	4.3	0.5	2.47	1.6	No	Yes	No	No	No	No		1
1852	200.239	1_Johor	SMK SERI PERDANA	47	Female	Malay	Degree	Married	No	No	Low	5	No Sedentary	>=2	<3	Inadequate	6.5	< 7 hrs	70	No central obese	4	No Depression	10	Anxiety	12	No Stress	No	No	4.7	129	68	5.4	0.5	3.67	1.5	No	No	No	No	No	No	0	0
1853	200.239	1_Johor	SMK SERI PERDANA	52	Male	Chinese	Degree	Married	No	No	Moderate	239	No Sedentary	>=2	<3	Inadequate	6.5	< 7 hrs	90	Central obese	0	No Depression	6	No Anxiety	4	No Stress	No	No	5.8	127	80	5.9	0.8	4.04	1.5	No	Yes	No	No	No	No	1	0
1854	200.239	1_Johor	SMK SERI PERDANA	34	Female	Malay	Degree	Married	No	No	Low	152	No Sedentary	<2	<3	Inadequate	8	7 hrs and above	62	No central obese	2	No Depression	6	No Anxiety	2	No Stress	No	No	4.9	105	68	4.7	0.5	2.57	1.9	No	No	No	No	No	No	0	0
1855	200.239	1_Johor	SMK SERI PERDANA	28	Female	Malay	Degree	Married	No	No	Low	198	No Sedentary	<2	<3	Inadequate	6.36346	< 7 hrs	64	No central obese	0	No Depression	8	Anxiety	4	No Stress	No	No	4.7	113	68	5.5	0.5	2.67	1.68	No	No	No	No	No	No	0	0
1856	200.239	1_Johor	SMK SERI PERDANA	51	Female	Malay	Degree	Married	No	No	High	240	No Sedentary	>=2	>=3	Adequate	5	< 7 hrs	79	No central obese	8	No Depression	8	Anxiety	8	No Stress	No	No	5.2	125	71	5.6	0.9	3.49	1.7	No	No	No	No	No	No	0	0
1857	321.841	1_Johor	SMK PENGHULU SAAT	45	Female	Malay	Degree	Married	Yes	No	Moderate	120	No Sedentary	<2	<3	Inadequate	6.5	< 7 hrs	69	No central obese	10	Depression	14	Anxiety	14	Stress	No	No	5.1	122	76	6.4	1.4	3.96	1.8	No	No	No	No	No	Yes	0	0
1858	321.841	1_Johor	SMK PENGHULU SAAT	36	Female	Malay	Degree	Married	No	No	Low	171	No Sedentary	<2	>=3	Inadequate	6.21058	< 7 hrs	81	Central obese	6	No Depression	4	No Anxiety	12	No Stress	No	No	4.2	133	74	3.9	0.5	2.47	1.2	No	No	No	No	No	No	0	0
1859	321.841	1_Johor	SMK PENGHULU SAAT	34	Female	Malay	Degree	Married	No	No	Moderate	120	No Sedentary	<2	<3	Inadequate	6	< 7 hrs	69	No central obese	8	No Depression	8	Anxiety	18	Stress	No	No	4.5	111	79	6.2	2.2	3.7	1.5	No	No	No	No	No	No	0	0
1860	321.841	1_Johor	SMK PENGHULU SAAT	46	Male	Malay	Degree	Married	No	No	Low	60	No Sedentary	<2	<3	Inadequate	4.5	< 7 hrs	99	Central obese	0	No Depression	4	No Anxiety	0	No Stress	No	No	6.2	137	79	5	1.8	2.88	1.3	No	Yes	No	No	No	Yes		1
1861	321.841	1_Johor	SMK PENGHULU SAAT	44	Male	Malay	Degree	Married	No	No	Low	191	No Sedentary	<2	<3	Inadequate	6.5	< 7 hrs	86.5	No central obese	0	No Depression	2	No Anxiety	8	No Stress	No	No	4.7	138	72	6.6	1.3	4.71	1.3	No	No	No	No	No	No	0	0
1862	321.841	1_Johor	SMK PENGHULU SAAT	40	Female	Malay	Degree	Married	Yes	No	Low	30	No Sedentary	>=2	<3	Inadequate	5.5	< 7 hrs	89	Central obese	2	No Depression	8	Anxiety	8	No Stress	No	No	5.2	132	83	5.4	0.8	3.44	1.6	No	No	No	No	No	No	0	0
1863	321.841	1_Johor	SMK PENGHULU SAAT	44	Female	Malay	Degree	Married	No	No	Low	180	No Sedentary	<2	<3	Inadequate	6.17404	< 7 hrs	71	No central obese	4	No Depression	2	No Anxiety	2	No Stress	No	No	5.1	108	62	5	0.7	3.18	1.5	No	No	No	No	No	No	0	0
1864	321.841	1_Johor	SMK PENGHULU SAAT	51	Male	Malay	Degree	Married	Yes	No	Low	251	No Sedentary	<2	>=3	Inadequate	5	< 7 hrs	88	No central obese	2	No Depression	8	Anxiety	4	No Stress	No	No	4.8	146	88	5.2	1.2	3.36	1.3	No	No	No	No	Yes	Yes	0	0
1865	321.841	1_Johor	SMK PENGHULU SAAT	36	Female	Malay	Diploma and below	Married	Yes	Yes	Low	10	No Sedentary	<2	<3	Inadequate	7	7 hrs and above	72.5	No central obese	8	No Depression	6	No Anxiety	10	No Stress	No	No	4.3	112	67	5.6	1	3.45	1.7	No	No	No	No	No	No	0	0
1867	321.841	1_Johor	SMK PENGHULU SAAT	36	Female	Malay	Degree	Married	Yes	No	High	30	No Sedentary	<2	<3	Inadequate	6.34856	< 7 hrs	76.2	No central obese	2	No Depression	2	No Anxiety	4	No Stress	No	No	4.5	116	76	6	2	3.49	1.6	No	No	No	No	No	No	0	0
1868	321.841	1_Johor	SMK PENGHULU SAAT	39	Female	Malay	Degree	Married	Yes	No	Low	168	No Sedentary	<2	<3	Inadequate	6.57308	< 7 hrs	66	No central obese	6	No Depression	6	No Anxiety	4	No Stress	No	No	5	141	82	5.3	0.7	3.28	1.7	No	No	No	No	Yes	Yes	0	0
1869	321.841	1_Johor	SMK PENGHULU SAAT	44	Female	Malay	Degree	Married	Yes	No	Low	193	No Sedentary	<2	<3	Inadequate	5	< 7 hrs	75	No central obese	10	Depression	16	Anxiety	14	Stress	No	No	5	155	96	5.7	1.1	3.4	1.8	No	No	Yes	No	Yes	Yes		1
1870	254.154	1_Johor	SMK DATO PENGGAWA TIMUR	38	Female	Malay	Degree	Married	No	No	Moderate	90	No Sedentary	>=2	>=3	Adequate	5	< 7 hrs	65	No central obese	2	No Depression	2	No Anxiety	6	No Stress	No	No	4.3	109	72	3.9	0.5	2.17	1.56	No	No	No	No	No	No	0	0
1871	254.154	1_Johor	SMK DATO PENGGAWA TIMUR	37	Female	Malay	Degree	Married	Yes	No	Low	195	No Sedentary	<2	<3	Inadequate	5.5	< 7 hrs	91	Central obese	6	No Depression	4	No Anxiety	8	No Stress	No	No	4.7	129	88	6	1.2	4.01	1.45	No	No	No	No	No	No	0	0
1872	254.154	1_Johor	SMK DATO PENGGAWA TIMUR	45	Female	Indian	Degree	Married	Yes	No	High	180	No Sedentary	<2	<3	Inadequate	5.5	< 7 hrs	95	Central obese	2	No Depression	8	Anxiety	8	No Stress	Yes	Yes	4.9	146	97	5.36538	0.8	1.63	1.52	No	No	No	No	No	No	0	0
1873	254.154	1_Johor	SMK DATO PENGGAWA TIMUR	41	Female	Malay	Degree	Married	No	No	Low	157	No Sedentary	<2	<3	Inadequate	6.5	< 7 hrs	63	No central obese	4	No Depression	10	Anxiety	6	No Stress	No	No	4.5	103	63	3.6	0.7	1.61	1.63	No	No	No	No	No	No	0	0
1874	254.154	1_Johor	SMK DATO PENGGAWA TIMUR	32	Female	Malay	Master and above	Married	No	No	Low	240	No Sedentary	<2	<3	Inadequate	6.5	< 7 hrs	80	Central obese	2	No Depression	4	No Anxiety	0	No Stress	No	No	4.6	104	73	4.5	0.8	2.67	1.5	No	No	No	No	No	No	0	0
1875	254.154	1_Johor	SMK DATO PENGGAWA TIMUR	46	Female	Indian	Degree	Single	Yes	No	High	240	No Sedentary	<2	<3	Inadequate	7.5	7 hrs and above	64	No central obese	10	Depression	14	Anxiety	22	Stress	No	No	4.9	126	80	6.9	1	4.66	1.82	No	No	No	No	No	Yes	0	0
1876	254.154	1_Johor	SMK DATO PENGGAWA TIMUR	50	Female	Chinese	Degree	Married	No	No	Moderate	164	No Sedentary	<2	<3	Inadequate	5.5	< 7 hrs	79	No central obese	14	Depression	14	Anxiety	14	Stress	No	No	5.8	130	82	5.3	0.8	3.47	1.44	No	Yes	No	No	No	No	1	0
1877	254.154	1_Johor	SMK DATO PENGGAWA TIMUR	48	Female	Chinese	Degree	Married	No	No	Moderate	300	No Sedentary	>=2	<3	Inadequate	6.5	< 7 hrs	95	Central obese	2	No Depression	6	No Anxiety	6	No Stress	No	No	4.5	144	87	4.4	1.2	2.58	1.31	No	No	No	No	No	No	0	0
1878	254.154	1_Johor	SMK DATO PENGGAWA TIMUR	37	Female	Malay	Degree	Married	Yes	No	Moderate	169	No Sedentary	<2	<3	Inadequate	7	7 hrs and above	88	Central obese	2	No Depression	4	No Anxiety	4	No Stress	No	No	4	115	73	5.7	1.6	3.11	1.92	No	No	No	No	No	Yes	0	0
1879	254.154	1_Johor	SMK DATO PENGGAWA TIMUR	26	Female	Malay	Degree	Single	No	No	Low	179	No Sedentary	<2	<3	Inadequate	5	< 7 hrs	71.0058	No central obese	10	Depression	20	Anxiety	20	Stress	No	No	4.5	102	69.6154	4.3	0.8	2.26	1.7	No	No	No	No	No	No	0	0
1880	254.154	1_Johor	SMK DATO PENGGAWA TIMUR	49	Female	Malay	Degree	Married	No	No	Moderate	149	No Sedentary	<2	<3	Inadequate	7.5	7 hrs and above	86	Central obese	0	No Depression	4	No Anxiety	2	No Stress	No	No	4.5	139	76	5.2	1.1	3.54	1.1	No	No	No	No	No	No	0	0
1881	254.154	1_Johor	SMK DATO PENGGAWA TIMUR	44	Female	Malay	Degree	Married	Yes	No	Low	300	No Sedentary	<2	<3	Inadequate	6	< 7 hrs	77	No central obese	0	No Depression	4	No Anxiety	0	No Stress	No	No	4.7	134	69	5.8	1	4.07	1.33	No	No	No	No	No	No	0	0
1882	254.154	1_Johor	SMK DATO PENGGAWA TIMUR	33	Female	Malay	Degree	Married	Yes	No	Low	157	No Sedentary	<2	<3	Inadequate	5.5	< 7 hrs	68	No central obese	0	No Depression	0	No Anxiety	0	No Stress	No	No	4.7	115	66	5.2	0.8	3.03	1.74	No	No	No	No	No	No	0	0
1883	254.154	1_Johor	SMK DATO PENGGAWA TIMUR	27	Female	Malay	Degree	Married	No	No	Low	151	No Sedentary	<2	<3	Inadequate	6.5	< 7 hrs	75	No central obese	0	No Depression	0	No Anxiety	4	No Stress	No	No	4.7	97	68.5	6	0.8	4.03	1.57	No	No	No	No	No	No	0	0
1884	254.154	1_Johor	SMK DATO PENGGAWA TIMUR	41	Female	Malay	Degree	Married	Yes	No	Low	60	No Sedentary	<2	<3	Inadequate	6.5	< 7 hrs	89	Central obese	2	No Depression	4	No Anxiety	2	No Stress	No	No	4.5	120	73	5.3	0.8	3.57	1.39	No	No	No	No	No	No	0	0
1885	254.154	1_Johor	SMK DATO PENGGAWA TIMUR	44	Female	Malay	Diploma and below	Married	No	No	Moderate	180	No Sedentary	<2	<3	Inadequate	5.5	< 7 hrs	84	Central obese	6	No Depression	8	Anxiety	8	No Stress	No	No	5.3	157	92	6	1.3	4.38	1.01	No	No	No	No	No	No	0	0
1886	254.154	1_Johor	SMK DATO PENGGAWA TIMUR	34	Female	Malay	Degree	Married	Yes	No	Low	240	No Sedentary	>=2	>=3	Adequate	7	7 hrs and above	89	Central obese	0	No Depression	0	No Anxiety	0	No Stress	No	No	5	106	67	4.4	0.8	2.55	1.53	No	No	No	No	No	No	0	0
1887	254.154	1_Johor	SMK DATO PENGGAWA TIMUR	29	Female	Malay	Degree	Married	Yes	No	Low	300	No Sedentary	>=2	>=3	Adequate	7	7 hrs and above	106	Central obese	2	No Depression	0	No Anxiety	4	No Stress	No	No	4.7	116	71	4.3	0.7	3	0.94	No	No	No	No	No	No	0	0
1888	254.154	1_Johor	SMK DATO PENGGAWA TIMUR	48	Female	Indian	Degree	Married	No	No	High	180	No Sedentary	<2	<3	Inadequate	6	< 7 hrs	89	Central obese	18	Depression	20	Anxiety	16	Stress	No	No	4.8	118	76	4.93462	0.6	3.08885	1.21	No	No	No	No	No	No	0	0
1889	254.154	1_Johor	SMK DATO PENGGAWA TIMUR	40	Female	Malay	Degree	Married	No	No	Low	195	No Sedentary	<2	<3	Inadequate	6	< 7 hrs	103	Central obese	12	Depression	16	Anxiety	18	Stress	No	No	5.5	129	79	5.6	0.7	4.04	1.27	No	No	No	No	No	No	0	0
1890	254.154	1_Johor	SMK DATO PENGGAWA TIMUR	44	Female	Malay	Degree	Married	No	No	High	60	No Sedentary	<2	<3	Inadequate	7	7 hrs and above	68	No central obese	2	No Depression	4	No Anxiety	2	No Stress	No	No	4.9	106	67	5.3	0.9	2.86	1.99	No	No	No	No	No	No	0	0
1891	254.154	1_Johor	SMK DATO PENGGAWA TIMUR	27	Female	Malay	Degree	Married	Yes	Yes	Moderate	183	No Sedentary	<2	<3	Inadequate	5	< 7 hrs	80	Central obese	10	Depression	10	Anxiety	8	No Stress	No	No	4.7	108	61	4.6	0.5	2.62	1.79	No	No	No	No	No	No	0	0
[truncated: 9,795 more rows]
