# Supplementary material for: Prevalence of type 2 diabetes mellitus and impaired fasting glucose, and their associated lifestyle factors among teachers in the CLUSTer cohort
Source: PeerJ. 2024 Jan 22;12:e16778. doi: 10.7717/peerj.16778 (PMC10809994; doi:10.7717/peerj.16778)
Supplement: Supplemental Information 14 [file peerj-12-16778-s014.xlsx]

## Sheet: Sheet1
No	bmi
1	22.8
2	29.8
3	22.8
4	18.6
5	29.4
7	22.66
8	32.1
9	29.77
10	25.97
11	33.41
12	33.09
13	33.02
15	35.79
16	22.34
18	20.57
19	21.9
21	21.66
22	35.94
23	36.18
24	23.7
25	28.35
26	36.65
27	27.24
28	27.74
29	22.08
30	20.83
31	29.07
32	28
33	46.64
34	29.46
35	21.41
36	39.4
38	29.51
39	31.79
40	24.71
41	21.1
42	28.34
43	16.01
44	31.29
45	22.27
46	19.27
47	20.69
48	29.67
49	35.03
50	29.8
51	20.76
52	26.29
53	25.94
54	27.62
55	23.19
56	40.04
57	25.83
58	28.35
59	22.99
60	27.51
61	26.21
62	26.98
63	22.48
64	30.4
65	22.51
66	20.14
67	26.52
68	23.62
69	22.39
70	29.51
71	25
73	27.58
74	28.96
75	20.92
76	19.78
77	23.04
78	19.6
79	27.81
80	31.13
81	19.76
82	27.33
83	19.98
84	29.13
85	26.72
86	20.88
88	25.54
90	24.26
92	20.23
94	24.21
95	26.99
96	26.07
97	24.46
98	20.07
99	26.91
100	21.81
101	19.47
102	26.91
103	26.03
104	27.74
105	20.45
106	39.24
107	31.91
108	26.2
109	25.19
110	19.64
111	25.61
113	16.77
114	26.42
117	29.52
118	19.04
119	19.11
122	50.49
123	28.26
125	20.7
126	21.94
127	25.85
128	35.16
129	19.87
130	39.31
131	23.67
132	32.27
133	27.77
134	24.67
135	19.96
136	19.26
137	23.83
138	30.64
140	31.2
141	21.33
142	26.88
143	30.71
144	33.2
146	27.21
147	29.73
148	21.66
149	24.73
150	20.22
151	25.31
152	24.35
153	31.16
155	23.07
156	29.77
157	25.23
159	22.56
160	34.26
162	31.96
164	31.6
165	33.39
166	38.7
167	47.78
168	20.08
169	27
170	25.31
171	22.68
172	26.26
173	25.31
174	20.8
175	31.81
177	26.11
178	27.33
179	21.66
180	28.05
181	23.93
182	27.79
183	21.31
185	33.78
186	32.87
187	25.48
188	34.57
190	27.33
191	41.87
193	28.14
194	28.98
195	35.15
196	23.83
197	19.11
198	29.35
199	22.38
200	33.52
203	18.98
204	21.18
205	20.84
206	26.84
207	38.45
209	26.45
210	29.76
211	27.02
212	39.16
213	21.51
215	26.14
216	23.83
217	23.33
218	25.56
219	25.19
221	26.27
222	23.51
223	21.52
224	28.92
226	25.06
227	33.84
228	23.79
229	28.38
231	17.89
232	25.07
233	25.47
234	19.95
235	24.84
236	19.51
237	27.73
241	29.72
243	16.97
244	27.48
246	34.75
247	29.96
248	17.96
249	26.4
250	22.19
251	25.6
253	21.47
254	24.44
255	23.15
256	21.79
257	25.36
258	25.92
259	23.37
260	19.85
261	17.17
262	40.91
263	26.58
264	26.6
265	18.31
266	32.09
267	29.65
268	29.84
269	34.88
270	23.97
271	31.09
272	19.78
273	27.87
274	19.1
275	28.58
276	20.27
277	31.18
279	19.63
280	28.01
282	24.88
283	24.46
284	24.45
285	26.6
286	23.15
287	20.94
288	22.93
289	21.19
290	28.6
291	20.55
292	32.29
293	23.83
294	30.4
295	17.73
296	22.18
297	27.3
298	35.63
300	21.87
301	36.51
302	33.91
304	28.77
305	32.14
306	29.58
307	19.83
308	31.6
309	23.97
310	21.56
311	26.89
312	24.86
313	29.05
314	33.9
315	23.84
316	29.43
317	26.23
319	16.92
321	27.53
322	26.52
323	27.32
324	43.23
325	25.88
326	33.69
327	23.49
328	24.99
330	27.92
331	28.44
332	27.42
333	29.11
334	22.61
335	24.01
336	24.23
337	26.62
339	27.16
341	26.62
343	21.53
344	22.13
345	22.85
346	26.82
347	23.87
348	25.34
349	37.75
350	20.87
351	22.9
352	25.41
353	20.27
354	28.64
355	20.91
356	27.16
357	24.43
359	23.45
360	24.01
361	24.46
362	25.35
363	27.36
365	30.09
366	24.96
367	22.14
368	28.24
370	25.66
371	19.8
372	39.78
373	34.41
375	25.83
376	27.67
377	30.73
378	21.79
379	22.97
380	24.58
381	25.06
382	21.64
383	17.99
384	26.67
385	42.91
386	19.57
387	33.95
388	20.33
389	24.27
390	29.15
391	20.73
392	31.91
393	21.08
394	26.03
395	25.47
396	30.08
399	25.38
400	27.23
402	37.08
403	20.48
404	28.76
405	34.3
406	31
407	23
408	28.19
409	24.88
410	26.39
411	22.58
413	23.98
415	24.27
416	20.65
417	25.97
418	22.23
419	25.02
420	30.38
421	25.28
422	24.18
423	25.2
424	27.92
425	27.34
426	24.3
427	23.42
428	21.07
429	34.41
430	21.08
431	25.54
432	25.31
433	27.39
434	20.65
435	23.64
436	30.8
437	24.24
438	36.18
439	42.63
440	29.65
441	23.22
443	23.39
444	18.29
445	28.9
446	27.85
447	21.53
448	23.16
449	29.26
451	19.12
452	28.5
453	27.26
454	25.72
455	29.09
456	25.93
457	24.96
458	14.81
459	23.71
461	22.07
462	26.93
463	25.82
464	29.58
465	29.82
466	37.04
468	36.44
469	17.9
470	25.23
471	22.43
472	25.42
473	25.22
474	24.21
475	39.28
476	29.32
477	22.67
478	27.96
479	15.85
480	27.65
481	30
483	27.6
484	24
485	27.82
488	23.52
489	22.38
490	30.74
491	29.44
492	32.64
493	26.7
494	29.02
495	37.59
496	18.97
497	24.42
498	33.91
499	25.43
500	21.75
501	36.8
502	43.27
503	22.81
504	20.08
505	17.97
506	23.42
507	28
508	21.98
511	30.38
512	21.87
513	21.08
514	21.44
515	17.59
516	29.16
517	27.92
518	24.18
519	24.58
520	22.43
521	20.68
522	42.46
523	35.26
524	33.31
525	27.97
526	25.35
527	24.27
528	28.28
529	31.02
530	23.82
531	24.83
532	31.92
533	28.61
534	23.23
538	33.29
539	22.98
540	24.74
541	25.89
542	29.56
543	32.19
544	27.27
545	24.38
546	31.73
547	29.47
548	23.02
549	27.79
550	18.55
552	21.64
553	20.87
554	35.17
557	27.77
558	23.18
559	33.87
560	18.2
561	26.33
562	23.26
563	16.53
564	19.92
565	20.06
568	24.87
569	27.87
570	27.14
571	28.84
572	20.72
573	28.89
574	23.21
575	19.68
576	27.05
577	16.67
578	20.34
579	27.02
580	23.5
581	25.71
582	23.47
583	19.64
584	34.86
585	24.58
586	22.82
589	37.9
592	18.11
593	28.47
594	26.14
595	29.47
596	23.8
597	25.04
598	30.46
599	23.99
600	25.64
601	35.88
602	21.19
603	22.68
604	22.34
605	28.8
606	25.76
607	17.13
608	27.72
609	22.25
610	17.46
611	21.32
612	31.29
613	16.94
614	29.15
615	29.94
616	19.99
617	24.77
618	41.08
619	23.67
620	22.01
621	24.93
622	23.22
623	23.16
624	25.47
625	20.56
626	33.4
627	23.09
628	22.39
629	26.46
630	27.03
631	19.65
632	26.71
633	24.2
634	20.28
635	20.72
636	17.37
638	32.21
639	22.76
640	26.88
641	28.73
642	23.75
643	23.38
645	33.93
646	20.85
647	21.53
649	22.66
651	23.11
652	43.42
653	29.73
654	32.82
656	28.63
657	19.91
658	31.51
659	19.3
660	31.95
661	16.6
662	24.16
663	23.82
664	33.76
665	24.12
666	17.93
667	27.96
668	27.04
669	22.87
670	32.84
671	28.69
672	30.59
673	23.63
674	24.82
675	23.96
676	19.35
677	24.19
678	23.42
679	34.96
680	19.56
681	30.86
682	27.49
683	26.44
685	24.26
687	31.69
688	25.53
690	24.07
704	26.27
709	28.08
710	23.16
714	32.28
717	23.75
718	23.7
719	28.28
720	30.03
721	35.42
722	25.19
723	24.27
724	25.89
725	26.81
726	27.1
727	31.63
728	29.04
729	21.41
730	34.35
731	24.43
732	20.15
733	38.2
734	28.21
735	28.09
736	23.44
737	22.67
738	25.18
739	26.42
740	25.3
741	27.38
742	23.91
743	37.34
744	26.23
745	33.67
746	25.89
747	29.79
748	25.12
749	19.4
750	25.64
751	27.42
752	19.95
753	29.79
754	23.56
755	18.09
756	28.66
757	26.93
758	48.47
759	24.25
760	26.26
761	24.84
762	20.73
763	33.16
764	27.81
765	33.13
768	32.67
769	27.01
771	31.76
772	24.74
773	27.36
774	17.71
775	21.23
776	19.48
777	28.51
778	23.46
779	24.5
780	24.46
781	22.78
782	24.67
783	28.54
784	31.33
785	24.91
786	29.47
788	32.21
789	30.15
791	27.57
793	35.24
794	31.34
795	19.87
796	20.1
797	27.03
798	18.14
799	33.53
800	20.22
801	30.58
802	28.84
803	26.31
804	30.61
805	18.53
806	42.92
807	21.13
808	32.61
809	25.72
810	20.83
811	29.73
812	20.37
813	27.74
814	22.58
815	32.5
816	28.56
817	21.04
818	25.03
819	25.41
820	23.59
821	26.74
822	24.03
824	22.93
825	26.5
826	24.36
827	22.09
828	21.87
830	26.1
831	26.97
832	27.53
833	26.36
834	24.39
835	17.56
836	29.47
837	21.8
838	30.31
839	27.9
841	32.68
842	21.3
843	21.7
844	32.64
845	23.9
846	22.03
847	25.04
848	28.57
849	23.63
850	34.62
851	27.02
852	29.68
853	23.87
854	24.21
855	24.48
856	23.06
857	27.86
858	25.93
859	29.24
861	27.82
863	17.68
864	30.09
866	32.66
867	38.38
868	31.56
869	23.84
870	20.42
871	20.42
872	22.38
873	21.64
874	25.07
875	28.3
877	24.98
879	29.54
880	21.82
881	26.49
882	22.06
883	27.2
884	31.93
885	27.32
886	22.77
887	24.13
888	20.5
889	31.53
890	19.3
892	30.15
893	30.04
894	20.43
896	26.24
898	30.07
899	28.65
900	19.91
901	24.88
902	30.61
903	24.73
905	26.84
906	40.25
907	33.39
908	21.15
909	25.16
910	16.95
911	24.61
912	23.38
913	30.34
914	21.84
915	25.51
917	23.56
918	23.95
919	43.04
920	25.13
922	21.6
923	31.38
924	18.72
925	22.4
926	25.81
927	18.38
928	24.91
929	32.52
930	21.79
931	24.74
934	23.35
935	29.8
936	21.91
937	17.59
938	22.14
939	24.16
940	19.57
941	23.23
942	20.66
943	26.46
944	26.08
945	21.85
946	29.82
947	39.32
948	22.6
949	26.99
950	21.71
951	27.81
952	22.85
953	27.5
954	19.6
955	20.04
956	20.92
957	25.58
958	28.67
959	26.66
960	26.63
961	15.95
962	30.43
963	26.29
964	22.56
965	20.62
966	25.46
967	25.31
968	23.85
969	27.38
970	24.45
972	29.13
973	23.61
974	28.57
976	24.39
977	21.98
980	21.55
981	27.63
982	37.95
985	32.84
986	23.53
988	37.14
989	21.6
990	26.09
991	27.64
992	20.18
993	26.47
994	33.69
995	22.13
996	25.77
997	17.25
998	34.97
999	31.63
1000	24.11
1001	31.96
1002	34.02
1003	24.39
1004	24.6
1005	26.7
1006	30.67
1007	25.48
1008	28.35
1009	25.22
1010	21.83
1011	28.37
1012	22.27
1013	19.6
1014	25.64
1015	23.81
1016	25.74
1017	28.04
1018	28
1019	22.33
1020	26.41
1021	22.96
1022	30.3
1024	25.58
1025	26.07
1026	22.58
1027	27.83
1028	25.4
1029	23.06
1030	21.84
1031	38.17
1032	28.48
1033	28.12
1034	26.33
1035	28.91
1036	30.71
1037	23.11
1038	21.74
1039	27.72
1040	22.73
1041	26.56
1042	23.33
1044	26.35
1045	17.51
1046	28.75
1047	26.91
1048	37.85
1049	26.54
1050	34.05
1051	32.26
1052	31.5
1053	25.6
1054	27.96
1055	21.02
1056	23.95
1057	38.27
1058	29.55
1059	21.18
1060	35.31
1061	17.96
1062	23.98
1063	23.44
1064	32.82
1065	26.06
1066	29.4
1067	22.36
1068	37.84
1069	35.59
1070	24.02
1071	19.47
1073	36.49
1074	20.63
1075	21.62
1076	22.26
1077	24.44
1078	28.68
1079	24.93
1080	37.07
1081	27.79
1082	28.81
1083	25.1
1084	30.12
1085	21.38
1086	31.57
1087	21.04
1088	31.86
1089	21.83
1090	31.96
1091	20.89
1092	21.02
1093	25.97
1094	21.14
1095	25.42
1096	28.24
1097	27.24
1098	21.51
1099	29.83
1100	27.88
1101	18.61
1102	23.54
1103	16.89
1104	24.89
1105	37.66
1106	17.83
1107	24.49
1108	22.98
1109	38.78
1110	27.83
1111	29.61
1112	34.69
1113	30.35
1114	18.13
1116	21.66
1117	26.16
1118	41.41
1119	30.68
1120	32.05
1122	22.16
1123	42.06
1124	21.74
1135	27.22
1136	25.34
1137	22.23
1138	31.68
1139	25.02
1140	26.91
1141	24.69
1142	32.42
1143	26.45
1144	26.06
1145	22.18
1146	21
1147	20.56
1148	20.69
1149	22.07
1150	26.77
1151	31.04
1152	19.44
1153	21.64
1154	19.87
1156	28.69
1157	25.7
1158	21.94
1159	37.91
1160	23.49
1161	32.35
1162	24.93
1163	28.6
1181	22.39
1182	25.24
1183	26.36
1186	26.32
1188	34.44
1189	33.13
1190	29.11
1191	19.03
1192	35.27
1195	20.56
1196	28.86
1197	24.34
1198	40.82
1199	18.79
1200	22.09
1201	30.63
1202	18.33
1203	29.35
1204	38.03
1205	26.96
1206	31.22
1207	28.44
1208	26.82
1209	28.53
1210	23.51
1211	21.09
1212	29.52
1213	30.49
1214	26.49
1215	23.7
1216	25.5
1217	21.19
1218	34.26
1219	17.22
1220	28.16
1221	26.13
1222	25.8
1223	35.46
1224	37.73
1225	28.98
1226	23.96
1227	31.71
1228	23.5
1230	32.98
1231	30.23
1233	27.63
1238	28.5
1239	22.42
1243	22.01
1244	20.8
1247	30.55
1248	29
1250	26.51
1251	19.44
1252	19.43
1253	26.23
1254	36.59
1255	20.33
1256	18.54
1257	19.31
1258	22.41
1260	19.06
1261	22.21
1262	19.06
1263	27.98
1264	21.87
1265	15.86
1267	21
1268	20.53
1269	31.97
1270	21.81
1271	27.28
1274	23.3
1276	26.3
1277	16.77
1279	20.47
1280	25.25
1281	29.64
1282	22.88
1283	22.8
1284	16.96
1286	19.97
1287	20.39
1288	26.9
1290	28.19
1291	21.49
1292	21.57
1294	21.16
1296	25.36
1297	24.86
1298	19.04
1301	24.8
1302	20
1304	20.57
1305	24.91
1306	25.97
1308	18.43
1309	16.06
1310	19.39
1311	18.15
1314	26.62
1317	24.78
1319	25.54
1321	34.1
1322	30.15
1323	22.97
1324	34.42
1325	27.41
1327	31.41
1328	26.65
1329	22.95
1330	20.21
1332	20.31
1333	27.3
1334	32.81
1335	26.18
1336	27.76
1337	20.69
1338	20.64
1339	35.27
1340	24.33
1341	20.56
1344	31.76
1346	22.18
1348	25.36
1349	26.22
1350	27.08
1351	29.53
1352	24.87
1354	23.1
1355	21.19
1356	26.25
1357	23.69
1358	31.76
1359	23.51
1360	20.13
1361	27.02
1362	26.04
1364	25.1
1365	17.88
1366	23.97
1367	17.3
1368	26.1
1369	32.76
1370	25.24
1371	27.98
1372	18.48
1373	25.1
1374	30.57
1375	29.86
1376	29.39
1377	19.47
1378	22.92
1379	26.6
1380	30.13
1381	27.03
1382	27.7
1383	25.58
1384	35.94
1385	27.14
1386	28.72
1387	35.15
1388	24.43
1389	27.75
1390	26.67
1391	25.66
1392	29.35
1393	24.07
1394	26.19
1395	26.92
1396	23.76
1397	25.43
1398	30.68
1399	25.43
1400	31.91
1401	24.8
1402	26.53
1403	30.53
1404	28.44
1405	37.19
1406	32.67
1407	21.77
1408	27.54
1409	24.34
1410	20.97
1411	28.17
1412	29.1
1413	27.18
1414	34.88
1415	27.65
1416	34.81
1417	31.72
1418	23.56
1419	25.59
1420	23.87
1421	23.01
1422	24.09
1423	18.09
1424	25.08
1425	34.84
1426	18.73
1427	23.79
1428	23.37
1429	19.89
1430	27.34
1431	21.4
1432	37.04
1433	31.85
1434	24.74
1435	39.78
1436	26.4
1437	31.55
1438	23.84
1439	25.43
1440	31.64
1441	19.77
1442	28.64
1443	27.89
1444	25.48
1445	22.06
1446	33.74
1447	25.08
1448	28.3
1452	30.44
1453	18.75
1454	35.55
1455	22.88
1456	28.22
1457	23.57
1458	22.95
1459	25.62
1460	16.91
1461	17.34
1462	22.88
1463	25.94
1464	37.09
1465	31.99
1466	24.42
1467	27.41
1468	21.01
1469	29.65
1470	24.39
1471	29.82
1472	31.77
1473	20.58
1474	36.25
1475	28.68
1476	21.99
1477	31.4
1478	27.21
1479	39.78
1480	21.57
1481	31.08
1482	27.75
1483	29.68
1484	29.4
1485	28.27
1486	20.73
1487	31.88
1488	22.56
1489	30.54
1490	23.51
1491	31.64
1492	27.51
1493	30.4
1494	26.73
1495	28.13
1496	47.36
1497	26.04
1498	25.35
1499	26.49
1500	23.47
1501	44.86
1502	24.67
1503	28.6
1504	20.87
1505	23.24
1506	38.59
1507	30.34
1508	22.54
1509	27.32
1510	19.91
1511	33.88
1512	26.74
1513	26.65
1514	37.25
1515	24.42
1516	19.55
1517	23.09
1518	21.04
1519	15.89
1520	22.52
1521	25.13
1522	19.81
1523	22.96
1524	20.05
1525	24.38
1526	28.72
1527	28.49
1528	22.1
1529	25.12
1530	26.67
1531	26.19
1532	20.74
1533	17.34
1534	22.28
1535	22.41
1536	29.02
1537	43.75
1538	24.54
1539	28.7
1540	28.88
1541	30.63
1542	35.99
1543	20.97
1544	18.48
1545	29.93
1548	19.47
1551	28.29
1552	24.63
1553	31.9
1554	18.99
1555	18.93
1556	23.02
1557	20.79
1559	22.76
1560	22.54
1561	25.2
1562	26.48
1563	21.79
1564	23.23
1565	27.72
1566	25.95
1568	21.64
1569	23.87
1570	24.95
1571	24.11
1572	26.29
1573	24.04
1574	20.02
1576	28.24
1577	25.44
1578	24.53
1579	31.51
1580	22.48
1581	26.23
1582	23.85
1583	21.93
1585	33.24
1586	20.03
1587	31.2
1588	35.86
1592	27.88
1593	29.28
1594	29.01
1595	24.29
1596	22.21
1597	18.86
1598	33.7
1599	25.58
1601	37.1
1602	19.52
1603	25.58
1604	29.17
1605	27.33
1606	26.02
1609	31.68
1610	23.01
1611	31.38
1612	30.93
1613	26.9
1614	28.7
1616	17.12
1617	17.72
1618	26.47
1619	14.82
1620	26.27
1621	19.3
1623	20.03
1624	16.16
1626	23.38
1627	20.02
1628	43.41
1629	23.83
1631	23.59
1632	19.84
1634	20.07
1640	23.37
1641	34.89
1642	22.42
1643	22.82
1644	28.72
1645	26.96
1646	23.99
1647	22.92
1648	28.84
1649	25.22
1650	26.4
1652	26.4
1653	24.41
1654	33.85
1655	40.82
1656	30.79
1658	26.22
1661	18.76
1662	26.36
1663	24.55
1664	28.3
1665	21.18
1666	29.33
1667	21.23
1668	22.8
1669	33.57
1670	39.04
1671	21.42
1672	27.7
1673	28.5
1674	22.25
1675	28.2
1677	19.71
1678	24.68
1679	24.82
1680	24.59
1681	18.67
1682	26.83
1683	30.12
1684	30.72
1685	26.62
1686	19.06
1687	29.58
1688	28.61
1689	27.47
1690	36.62
1691	27.62
1692	27.38
1693	27.05
1694	22.67
1695	37.21
1696	29.11
1697	25.77
1698	26.57
1699	18
1700	28.84
1701	21.49
1702	19.9
1703	21.51
1704	22.76
1705	25.08
1706	24.12
1707	25.71
1708	26.94
1709	26.08
1711	30.57
1712	22.94
1713	22.51
1715	32.77
1716	26.14
1718	35.45
1719	35.59
1720	24.23
1721	16.36
1722	25.2
1723	20.75
1724	21.72
1725	28.2
1727	40.16
1728	24.06
1729	25.43
1730	22.73
1731	26.4
1733	24.32
1734	20.68
1735	19.51
1736	21.8
1738	36.51
1740	23.46
1741	31.06
1742	19.52
1743	19.35
1744	19.43
1745	19.75
1746	26.61
1747	22.25
1748	42.3
1749	28.49
1750	25.09
1751	24.99
1752	29.55
1753	22.76
1754	30.63
1755	22.07
1756	30.78
1757	30
1758	30.12
1759	21.6
1760	27.82
1762	16.34
1763	26.2
1764	24.77
1765	17.11
1766	28.05
1767	34.1
1769	29.3
1771	19.1
1775	34.41
1776	23.86
1777	25.06
1778	25.32
1779	25.84
1780	24.36
1781	27.53
1782	21.94
1783	28.05
1784	17.17
1785	25.07
1786	19.06
1787	21.03
1788	19.74
1789	25.15
1790	19
1791	24.72
1792	21.6
1793	24.2
1794	24.65
1795	22.88
1796	25.87
1797	31.73
1798	32.21
1799	24.51
1800	21.71
1801	19.94
1802	26.74
1803	27.21
1805	22.59
1806	21.17
1807	24.93
1808	26.49
1809	26.16
1810	23.87
1811	22.9
1813	24.75
1814	22.03
1815	22.14
1816	19.44
1817	30.95
1819	22.1
1820	24.76
1822	24.35
1823	19.9
1824	22.82
1825	23.02
1826	29.7
1827	23.42
1828	20.23
1832	21.4
1833	30.15
1834	18.36
1835	26.89
1836	36.66
1837	23.93
1838	21.04
1839	20.63
1840	22.01
1843	24.97
1846	24.92
1847	27.18
1848	25.22
1850	32.66
1851	23.71
1852	21.82
1853	23.77
1854	15.66
1855	20.77
1856	25.51
1857	23.31
1858	28.74
1859	22.09
1860	32.01
1861	26.38
1862	34.73
1863	22.49
1864	26.43
1865	25.73
1867	26.57
1868	21.64
1869	21.49
1870	19.51
1871	33.64
1872	28.05
1873	18.99
1874	19.73
1875	19.03
1876	22.56
1877	25.37
1878	26.44
1879	13.3
1880	27.17
1881	27.49
1882	21.38
1883	24.59
1884	30.81
1885	29.68
1886	31.58
1887	41.02
1888	22.02
1889	37.53
1890	22.07
1891	23.63
1892	24.99
1893	11.47
1894	28.76
1896	32.98
1898	25.27
1900	20.35
1901	26.1
1902	23.96
1903	29.57
1904	28.55
1905	18.61
1907	22.26
1908	24.26
1909	26.93
1910	24.94
1911	24.33
1913	21.15
1914	26.22
1915	21.02
1916	30.92
1917	29.97
1918	27.23
1919	25.67
1920	24.82
1921	25.67
1922	29.19
1923	23.64
1924	16.62
1926	28.13
1927	27.91
1928	25.41
1929	21.62
1930	20.13
1931	24.77
1932	27.4
1933	28.18
1934	27.2
1935	27.78
1936	25.44
1937	35.96
1939	20.97
1940	48.22
1941	29.54
1942	22.88
1943	27.44
1944	27.86
1945	31.94
1946	34.45
1947	30.08
1948	17.64
1949	24.67
1951	20.94
1953	20.88
1954	22.71
1955	24.71
1959	31.73
1960	31.76
1962	28.18
1963	25.52
1964	26.08
1965	26.12
1966	28.79
1968	28.84
1969	27.76
1970	18.35
1971	19.35
1972	27.43
1975	35.71
1977	24.05
1978	30.26
1979	27.28
1980	20.96
1981	25.81
1982	35.95
1983	23.34
1984	23.55
1985	29.44
1986	29.34
1988	25.52
1989	29.48
1990	30.54
1991	24.54
1993	21.49
1994	23.99
1995	22.75
1996	34.65
1997	20.67
1998	24.67
1999	24.2
2000	22.64
2001	19.78
2002	23.71
2003	33.98
2004	22.34
2005	28.93
2006	35.17
2007	26.74
2009	26.49
2010	27.3
2011	21.52
2012	23.19
2013	24.91
2014	30.88
2015	25.37
2016	18.43
2017	35.95
2018	23.71
2019	21.28
2020	22.67
2021	27.03
2023	34.1
2025	25.19
2026	21.64
2027	23.54
2028	27.55
2029	25.67
2030	25.76
2031	23.31
2032	31.23
2033	29.55
2034	26.98
2035	28.34
2036	28.63
2037	24.85
2038	21.47
2039	27.37
2040	27.65
2041	20.3
2042	27
2043	22.5
2044	20.55
2045	21.14
2046	32.52
2047	34.33
2048	24.42
2049	31
2050	24.5
2051	18.05
2052	24.5
2053	26.77
2054	22.6
2055	19.74
2056	28.5
2057	31.4
2058	29.64
2059	27.24
2060	24.42
2062	23.34
2063	26.4
2064	27.85
2065	22.05
2066	26.84
2068	24.43
2069	17.77
2070	24.26
2071	28.83
2072	26.6
2073	41.56
2074	20.6
2075	27.89
2077	25.12
2078	18.71
2079	25.22
2080	33.65
2081	20.8
2083	25.41
2084	18.22
2085	21.21
2086	27
2087	19.82
2088	24.88
2089	23.11
2090	26.46
2091	21.91
2092	41.75
2093	28.67
2094	24.84
2095	23.13
2096	16.75
2097	13.02
2100	29.83
2102	24.88
2103	22.59
2104	28.94
2106	28.62
2107	25.8
2108	27.49
2110	23.62
2111	25.06
2112	28.48
2113	26.37
2114	32.49
2115	22.99
2116	32.59
2118	31.4
2119	26.72
2120	22.07
2121	19.83
2122	32.54
2123	30.75
2125	20.2
2126	24.61
2127	24.61
2128	26.68
2129	29.22
2130	26.05
2131	25.67
2133	33.58
2134	30.82
2136	26.19
2138	20.23
2139	29.96
2140	26.7
2142	29.61
2143	22.68
2144	24.36
2145	22.11
2146	23.06
2147	32.38
2149	33.71
2150	23.49
2151	19.3
2153	25.2
2154	47.35
2155	28.33
2156	26.83
2157	26.27
2158	33.32
2159	29.33
2160	35.88
2161	21.94
2162	23.83
2163	30.46
2164	25.44
2166	22.02
2167	27.43
2168	22.09
2169	30.89
2170	26.09
2171	20.92
2172	22.68
2173	22.19
2174	23.19
2175	26.87
2176	31.67
2177	19.35
2178	23.06
2179	31.51
2180	20.21
2181	19.86
2182	25.45
2183	19.52
2184	19.15
2185	23.14
2187	29.22
2188	25.77
2190	27.7
2191	29.52
2192	22.64
2193	25.32
2194	23.13
2195	53.78
2196	32.65
2197	20.08
2198	33.1
2199	32.05
2200	27.58
2202	30.71
2203	21.1
2204	19.65
2205	25.29
2206	23.66
2207	34.24
2208	24.64
2209	28.56
2210	23.36
2211	15.94
2212	23.81
2213	23.19
2214	20.6
2215	21.67
2216	24.7
2217	19.56
2218	23.88
2219	20.72
2220	29.41
2221	31.45
2222	31.85
2223	18.6
2224	27.13
2225	26
2226	36.51
2227	22.26
2228	26.78
2229	32.51
2230	22.74
2231	23.41
2232	27.65
2233	25.36
2234	30.72
2235	18.74
2236	28.91
2237	25.94
2240	27.64
2241	18.86
2242	23.13
2243	25.86
2244	28.3
2245	22.89
2246	34.62
2247	27.88
2248	30.63
2249	20.39
2251	17.4
2252	19.88
2253	27.23
2254	39.86
2255	26.48
2256	28.21
2257	26.23
2258	19.47
2259	20.72
2260	23.86
2261	29.69
2262	40.49
2263	22.14
2264	25.86
2265	31.67
2266	21.3
2267	42.23
2268	34.41
2270	22.96
2271	35.56
2272	23.59
2273	26.12
2274	23.83
2275	16.73
2276	36.23
2277	36.08
2278	25.62
2279	27.4
2280	28.26
2281	21.78
2282	22.75
2283	21.05
2284	27.26
2285	31.47
2286	16.94
2287	26.47
2288	26.85
2289	25.63
2290	30.86
2291	33.89
2292	34.59
2293	32.08
2296	22.81
2297	27.53
2298	32.34
2299	36.16
2300	24.57
2301	37.23
2302	18.62
2303	27.91
2304	26.02
2305	23.13
2306	28.71
2307	27.96
2308	32.37
2309	18.14
2310	18.53
2311	20.08
2312	25.41
2313	28.54
2314	16.78
2315	18.54
2316	31.71
2318	31.63
2319	19.88
2320	23.98
2321	31.87
2323	24.12
2324	23.03
[truncated: 9,413 more rows]
